# Supplementary material for: Enhanced Hyper-Cube Framework Aco for Combinatorial Optimization Problems
Source: Preprints.org preprint supplement (doi:10.20944/preprints202108.0573.v1), 2021-08-31
Supplement: Supplementary file 1 [file supplementary]

## Sheet: 00_Index
		Global optimal solution		Relaibility (%)		Normalized Price (iteration)		Correlation Coefficent		Performance rate		Elapsed time (Sec)		Solution Quality
		Fast convergence	Slow Convergence	Fast convergence	Slow Convergence	Fast convergence	Slow Convergence	Fast convergence	Slow Convergence	Fast convergence	Slow Convergence	Fast convergence	Slow Convergence	Fast convergence	Slow Convergence
	Seed (301)	3972.67	3973	5	9.5	304.8	646.632	-1	-1	0.003937	0.0015465	0.98678	2.9334	98.1759	98.7041
	Seed (2)	3973.01	3973	5	7.5	309.8	819.467	-1	-1	0.0032279	0.0012203	1.1096	2.8795	98.4678	98.765
	Seed (50)	3973.01	3973.01	8.5	8.5	181.823	1232.9	-1	-1	0.0054998	0.0008111	1.0176	2.8753	98.3627	98.5986
	Seed (75)	3972.5	3973.01	6	8.5	262.667	262.667	-1	-0.88386	0.0044416	0.0013725	0.80277	2.8889	98.452	98.6644
	Seed (111)	3973	3973	9.5	8	165.79	770.938	-1	-0.89751	0.0060317	0.0012971	0.8028	2.8697	98.7001	98.7581
	Seed (200)	3973.01	3973	10.5	8	153.381	770.25	-0.83206	-1	0.0065197	0.0012983	0.82998	2.8724	98.658	98.6982
	Seed (167)	3973	3973	15.07	7	158.632	887.643	-1	-1	0.0035854	0.0011266	0.77646	2.8924	98.44	98.7727
	Seed (225)	3973	3972.67	5.5	6	278.909	1022.83	-1	-1	0.0047893	0.00097768	0.78296	2.858	98.4335	98.5362
	Seed (11)	3973.01	3972.67	7.5	8.5	208.8	727.177	-1	-1	0.0047893	0.001537	0.80733	2.8801	98.4826	98.8401
	Seed (25)	3973.01	3973.01	7.5	4	205.867	1547.75	-1	-1	0.0048575	0.0006461	0.79009	2.8844	98.2128	98.5834
			Fast Convergence						Slow Convergence
			Relaibility (%)	Normalized Price (iteration)	Correlation Coefficent	Performance Rate	Elapsed time (sec)		Relaibility (%)	Normalized Price (iteration)	Correlation Coefficent	Performance Rate	Elapsed time (sec)
		Min.	5	153.381	-1	0.0032279	0.77646	Min.	4	262.667	-1	0.0006461	2.858
		Max.	15.07	309.8	-0.83206	0.0065197	1.1096	Max.	9.5	1547.75	-0.88386	0.0015465	2.9334
		Mean	8.007	223.047	-0.983206	0.00476792	0.870637	Mean	7.55	868.826	-0.978137	0.00118332	2.88341
		Median	7.5	207.333	-1	0.0047893	0.805065	Median	8	795.202	-1	0.0012587	2.8798
		Standrad division	2.95778	57.7742	0.050382	0.000988807	0.114063	Standrad division	1.49081	328.049	0.0438324	0.000281597	0.0191254
			Solution Quality
			Fast Conv.	Slow Conv.
		Min.	98.1759	98.5362
		Max.	98.7001	98.8401
		Mean	98.4385	98.6921
		Median	98.446	98.7011
		Standrad division	0.156612	0.0915871

## Sheet: 01_RBACO_Seeds(301)
Fast Converegnce Exp							Fast Converegnce Exp			Slow Converegnce Exp							Slow Converegnce Exp
#	CBLF	Quality	Taumax	Taumin	DeltaTauminmax		Global Optimal Solution =	3972.67		#	CBLF	Quality	Taumax	Taumin	DeltaTauminmax		Global Optimal Solution =	3973
1	3946.2	99.33	74.1131	0.06841	74.0447		Minimum Optimal Solution =	3596.39		1	3946.2	99.33	127.081	0.06841	127.012		Minimum Optimal Solution =	3572.41
2	3846.02	96.8	76.4067	0.07173	76.335		Mean of Optimal Solution =	3900.54		2	3865.97	97.31	127.098	0.07554	127.022		Mean of Optimal Solution =	3902.29
3	3963.71	99.77	73.4916	0.04726	73.4444		Median of Optimal Solution =	3900.54		3	3933.04	98.99	126.988	0.06917	126.919		Median of Optimal Solution =	3902.29
4	3928.55	98.88	71.8735	0.0735	71.8		Solution Standrad Deviation =	67.9941		4	3852.94	96.98	127.046	0.0704	126.976		Solution Standrad Deviation =	72.6408
5	3763.63	94.73	72.5041	0.07006	72.434		Average Price =	15.24		5	3939.01	99.14	126.987	0.0714	126.916		Average Price =	61.43
6	3944.58	99.28	74.0626	0.03273	74.0298		Relability =	5		6	3940.44	99.18	127.091	0.07038	127.021		Relability =	9.5
7	3915.81	98.56	75.863	0.07218	75.7908		Normalized Price =	304.8		7	3907.83	98.36	127.07	0.07264	126.998		Normalized Price =	646.632
8	3956.63	99.59	61.352	0.06913	61.2829		Average Solution Quality =	98.1759		8	3855.08	97.03	126.598	0.07342	126.525		Average Solution Quality =	98.2201
9	3958.78	99.64	69.3051	0.05882	69.2463		Average FDC =	-78.8235		9	3900.93	98.19	126.987	0.00214	126.985		Average FDC =	-26.4412
10	3935.79	99.06	77.3176	0.07325	77.2444		Correlation Coefficent =	-1		10	3615.74	91.01	127.028	0.06929	126.958		Correlation Coefficent =	-1
11	3882.54	97.72	64.9092	0.07323	64.8359		Solution Robustness =	57.3658		11	3963.19	99.75	127.025	0.00068	127.024		Solution Robustness =	53.7204
12	3871.26	97.44	65.3205	0.06936	65.2512		Performance Rate =	0.003937		12	3910.97	98.44	127.093	0.0742	127.019		Performance Rate =	0.0015465
13	3811.27	95.93	72.9778	0.06391	72.9139		Average Elapsed Time =	0.98678		13	3948.88	99.39	127.027	0.07308	126.954		Average Elapsed Time =	2.9334
14	3968.88	99.9	72.2387	0.00324	72.2355					14	3831.08	96.43	126.967	0.0726	126.895
15	3891.56	97.95	65.2379	0.06788	65.17					15	3708.21	93.33	127.132	0.07181	127.06
16	3764.99	94.76	66.4279	0.07123	66.3566					16	3942.94	99.24	127.035	0.00104	127.034
17	3814.73	96.02	63.41	0.07004	63.34					17	3972.67	99.99	126.964	0.00021	126.964
18	3869.57	97.4	58.6746	0.0697	58.6049					18	3870.99	97.43	127.086	0.06826	127.017
19	3919.04	98.64	74.3541	0.0701	74.284					19	3665.4	92.26	127.078	0.06619	127.012
20	3841.16	96.68	71.9044	0.07041	71.834					20	3869.61	97.4	127.06	0.07095	126.989
21	3914.2	98.52	70.6533	0.07025	70.5831					21	3817.76	96.09	127.105	0.06796	127.037
22	3969.76	99.92	64.6394	0.02708	64.6124					22	3972.35	99.98	127.05	0.00013	127.05
23	3939.8	99.16	74.6854	0.07335	74.6121					23	3893.93	98.01	126.995	0.06696	126.928
24	3882.95	97.73	57.5406	0.07074	57.4699					24	3964.92	99.8	126.95	0.0004	126.95
25	3971.06	99.95	67.0912	0.05252	67.0387					25	3908.69	98.38	126.946	0.00016	126.946
26	3851.43	96.94	80.3418	0.06833	80.2735					26	3906.72	98.33	127.068	0.07093	126.997
27	3741.73	94.18	74.981	0.06974	74.9113					27	3877.16	97.59	127.028	0.06973	126.958
28	3959.22	99.65	75.8717	0.07042	75.8012					28	3817.78	96.09	127.052	0.07081	126.981
29	3951.82	99.47	68.0539	0.07067	67.9833					29	3899.96	98.16	127.098	0.00016	127.098
30	3859.79	97.15	73.0052	0.07023	72.935					30	3712.06	93.43	127.08	0.07079	127.01
31	3952.66	99.49	74.7091	0.07251	74.6366					31	3881.88	97.71	127.085	0.07227	127.012
32	3920.35	98.67	68.8357	0.07117	68.7645					32	3833.43	96.49	126.993	0.07108	126.922
33	3962.66	99.74	79.3793	0.02026	79.3591					33	3807.89	95.84	127.078	0.07023	127.008
34	3950.27	99.43	68.0732	0.05292	68.0202					34	3953.61	99.51	126.786	0.00137	126.785
35	3906.31	98.32	75.0043	0.06687	74.9374					35	3943.03	99.25	126.971	0.06587	126.905
36	3786.9	95.32	73.4358	0.06964	73.3661					36	3952.96	99.5	126.928	0.0007	126.927
37	3955.02	99.55	75.0731	0.07251	75.0006					37	3918.75	98.63	126.995	0.07314	126.922
38	3883.57	97.75	56.5178	0.06945	56.4484					38	3972.67	99.99	127.039	1e-05	127.039
39	3918.21	98.62	72.9258	0.07468	72.8512					39	3900.12	98.17	127.023	0.07005	126.953
40	3963.19	99.75	72.4227	0.07189	72.3508					40	3828.26	96.36	126.919	0.06867	126.85
41	3951.46	99.46	77.9912	0.07525	77.916					41	3931.31	98.95	126.945	0.00054	126.945
42	3876.85	97.58	72.1792	0.06839	72.1108					42	3921.31	98.7	127.083	0.06744	127.016
43	3945.2	99.3	46.4678	0.07401	46.3938					43	3914.04	98.52	127.05	0.06811	126.982
44	3957.16	99.6	67.9484	0.035	67.9134					44	3911.36	98.45	127	0.07139	126.929
45	3910.97	98.44	75.6711	0.0742	75.5969					45	3962.67	99.74	126.994	0.00054	126.994
46	3930.1	98.92	64.1441	0.06937	64.0748					46	3880.47	97.67	127.092	0.07304	127.019
47	3966.86	99.85	71.4096	0.03074	71.3789					47	3938.86	99.14	127.024	0.07117	126.953
48	3855.14	97.03	57.0548	0.06839	56.9864					48	3935.79	99.06	127.083	0.00015	127.083
49	3824.12	96.25	72.9386	0.07378	72.8648					49	3928.03	98.87	127.088	0.07225	127.016
50	3897.53	98.1	74.4907	0.07473	74.4159					50	3933.6	99.01	126.999	0.06908	126.93
51	3760.5	94.65	66.9212	0.06981	66.8514					51	3572.41	89.92	127.098	0.07093	127.027
52	3694.36	92.99	77.4371	0.06751	77.3696					52	3885.64	97.8	127.101	0.07215	127.029
53	3951.3	99.45	73.8649	0.06926	73.7956					53	3972.03	99.98	127.112	1e-05	127.112
54	3938.53	99.13	66.0077	0.0727	65.935					54	3958.54	99.64	126.712	0.06571	126.646
55	3815.26	96.03	74.4453	0.06849	74.3768					55	3716.13	93.53	127.114	0.07094	127.043
56	3948.76	99.39	75.2589	0.00113	75.2578					56	3972.67	99.99	127.024	0.00017	127.024
57	3861.94	97.2	78.1317	0.0706	78.0611					57	3937.22	99.1	126.986	0.07423	126.912
58	3731.58	93.92	63.148	0.07159	63.0764					58	3964.22	99.78	127.052	0.00026	127.051
59	3827.22	96.33	69.9159	0.07259	69.8434					59	3902.89	98.24	127.07	0.06858	127.001
60	3796.19	95.55	72.4398	0.07368	72.3661					60	3912.24	98.47	127.069	0.00028	127.069
61	3922.62	98.73	69.2961	0.07387	69.2223					61	3926.81	98.84	127.117	0.06819	127.049
62	3957.5	99.61	75.6815	0.0729	75.6086					62	3909.72	98.41	126.485	0.07005	126.415
63	3925.97	98.82	70.3039	0.07085	70.233					63	3790.51	95.41	127.101	0.06652	127.034
64	3962.15	99.73	70.7363	0.07242	70.6639					64	3875.52	97.55	126.898	0.0723	126.826
65	3972.67	99.99	59.2441	0.02731	59.2168					65	3964.92	99.8	127.061	0.00046	127.06
66	3972.49	99.99	76.0901	0.07224	76.0178					66	3962.16	99.73	126.93	0.0649	126.865
67	3962.66	99.74	68.891	0.07053	68.8205					67	3934.31	99.03	127.019	0.07115	126.948
68	3923.69	98.76	77.0617	0.07517	76.9866					68	3907.2	98.34	127.108	0.07433	127.034
69	3956.84	99.59	72.0851	0.05182	72.0333					69	3936.25	99.07	126.999	0.06975	126.93
70	3888.05	97.86	77.7776	0.0706	77.707					70	3957.6	99.61	127.039	0.0723	126.967
71	3718.14	93.58	62.2315	0.07045	62.1611					71	3837.09	96.58	126.777	0.06951	126.707
72	3893.47	98	78.8695	0.07321	78.7963					72	3955.02	99.55	127.046	0.07412	126.971
73	3960.09	99.67	74.7591	0.07056	74.6886					73	3943.36	99.25	126.978	0.06802	126.91
74	3959.1	99.65	72.1715	0.02216	72.1493					74	3646.38	91.78	127.111	0.0696	127.042
75	3947.47	99.36	64.5197	0.07012	64.4496					75	3924.15	98.77	127.089	0.07396	127.015
76	3893.09	97.99	61.3976	0.07206	61.3255					76	3970.09	99.93	127.023	0.00101	127.022
77	3951.93	99.47	71.4468	0.07363	71.3732					77	3972.67	99.99	126.979	0.00016	126.979
78	3939.01	99.14	70.0385	0.06815	69.9703					78	3858.65	97.12	127.035	0.06676	126.968
79	3906.58	98.33	81.2121	0.06943	81.1427					79	3946.52	99.33	127.045	0.0758	126.97
80	3964.74	99.79	64.5074	0.07264	64.4348					80	3875.76	97.55	127.086	0.07031	127.015
81	3942.06	99.22	60.052	0.07032	59.9817					81	3915.49	98.55	127.088	0.06905	127.019
82	3817.76	96.09	77.1574	0.06796	77.0894					82	3760.58	94.65	127.1	0.06971	127.031
83	3834.12	96.5	72.2471	0.07111	72.176					83	3805.51	95.78	127.06	0.07126	126.989
84	3939.27	99.15	62.9795	0.07143	62.908					84	3927	98.84	127.049	0.07267	126.977
85	3787.93	95.34	75.4652	0.07408	75.3912					85	3932.69	98.99	127.088	0.07426	127.013
86	3969.47	99.91	68.6657	0.07105	68.5946					86	3759.08	94.62	127.077	0.0683	127.008
87	3744.88	94.26	74.0457	0.07006	73.9756					87	3746.57	94.3	127.084	0.06803	127.016
88	3953.37	99.51	70.3033	0.05934	70.244					88	3856.45	97.07	126.66	0.06985	126.59
89	3906.07	98.32	60.8514	0.07211	60.7793					89	3896.22	98.07	126.977	0.06938	126.907
90	3958.27	99.63	76.2204	0.07282	76.1476					90	3937.89	99.12	127.022	0.06928	126.953
91	3883.02	97.73	70.1344	0.07127	70.0631					91	3871.68	97.45	127.095	1e-05	127.095
92	3879.72	97.65	73.1935	0.0695	73.124					92	3970.09	99.93	126.979	0.00053	126.978
93	3892.61	97.98	58.5781	0.07152	58.5066					93	3689.71	92.87	127.12	0.07271	127.047
94	3856.17	97.06	56.552	0.06863	56.4834					94	3964.22	99.78	127.066	0.00018	127.066
95	3963.71	99.77	64.7281	0.03171	64.6963					95	3924.42	98.78	127.031	0.07201	126.959
96	3923.39	98.75	77.5174	0.07236	77.445					96	3962.16	99.73	127.065	0.00018	127.064
97	3827.29	96.33	75.7796	0.06893	75.7107					97	3973	100	127.068	0.00014	127.068
98	3955.8	99.57	70.3295	0.07058	70.259					98	3929.99	98.92	127.06	0.07087	126.989
99	3951.49	99.46	60.9562	0.07042	60.8858					99	3955.95	99.57	127.074	0.07043	127.003
100	3830	96.4	72.0315	0.0712	71.9603					100	3960.74	99.69	125.407	0.07162	125.335
101	3970.09	99.93	55.7182	0.03749	55.6807					101	3903.8	98.26	126.972	0.06606	126.906
102	3920.39	98.68	78.4436	0.07488	78.3687					102	3953.37	99.51	127.082	0.0702	127.012
103	3906.72	98.33	72.4746	0.07093	72.4037					103	3944.12	99.27	126.881	0.07304	126.808
104	3918.68	98.63	47.6909	0.06854	47.6224					104	3819.47	96.14	127.103	0.07362	127.029
105	3912.42	98.48	77.6105	0.07217	77.5383					105	3949.41	99.41	126.973	0.00048	126.972
106	3834.46	96.51	70.1734	0.07123	70.1022					106	3959.57	99.66	127.086	0.07147	127.014
107	3916.65	98.58	57.8305	0.07214	57.7584					107	3951.6	99.46	126.981	0.07307	126.908
108	3957.3	99.6	79.024	0.07441	78.9496					108	3888.74	97.88	126.95	0.06851	126.882
109	3948.58	99.39	67.9817	0.06926	67.9124					109	3953.4	99.51	127.003	0.07035	126.933
110	3812.01	95.95	72.6675	0.06708	72.6004					110	3930.1	98.92	126.82	0.07168	126.749
111	3885.71	97.8	74.4394	0.06964	74.3698					111	3949.75	99.41	127.02	0.07396	126.946
112	3939.41	99.15	64.3861	0.0713	64.3148					112	3909.03	98.39	126.932	0.07167	126.86
113	3903.22	98.24	79.2309	0.07268	79.1582					113	3655.99	92.02	127.112	0.07008	127.042
114	3877.37	97.59	62.604	0.06989	62.5341					114	3898.45	98.12	126.939	0.07071	126.868
115	3935.79	99.06	58.7155	0.0711	58.6444					115	3947.56	99.36	126.994	0.07474	126.919
116	3890.3	97.92	69.9858	0.0716	69.9142					116	3849.06	96.88	126.901	0.07662	126.824
117	3825	96.27	73.5448	0.06875	73.4761					117	3928.35	98.88	127.06	0.07175	126.988
118	3712.06	93.43	75.4005	0.07079	75.3297					118	3948.2	99.38	127.031	0.06936	126.961
119	3903.22	98.24	59.0976	0.07199	59.0256					119	3949.75	99.41	126.991	0.0646	126.926
120	3949.75	99.41	67.1947	0.07407	67.1206					120	3891.52	97.95	127.094	0.07213	127.022
121	3963.62	99.76	70.1102	0.06793	70.0423					121	3852.43	96.97	127.055	0.06856	126.986
122	3884.61	97.77	75.5865	0.06874	75.5178					122	3955.95	99.57	126.964	0.0006	126.963
123	3964.27	99.78	64.7168	0.00092	64.7159					123	3886.66	97.83	126.988	0.06874	126.92
124	3959.05	99.65	70.4444	0.07196	70.3724					124	3955.89	99.57	127.088	0.07043	127.018
125	3962.33	99.73	72.1214	0.07112	72.0503					125	3963	99.75	126.928	0.07179	126.856
126	3925.97	98.82	47.7162	0.07255	47.6437					126	3863.59	97.25	127.037	0.07204	126.965
127	3937.27	99.1	76.1142	0.07035	76.0438					127	3906.32	98.32	127.006	0.07057	126.936
128	3900.89	98.18	76.2059	0.07333	76.1326					128	3952.13	99.47	127.042	0.06993	126.972
129	3828.26	96.36	74.5184	0.06924	74.4492					129	3970.73	99.94	127.09	0.00017	127.089
130	3950.78	99.44	78.1374	0.00113	78.1362					130	3933.41	99	126.906	0.07136	126.835
131	3933.2	99	71.9855	0.0724	71.913					131	3956.98	99.6	126.939	0.07135	126.867
132	3910.64	98.43	62.7483	0.06873	62.6796					132	3893.91	98.01	127.079	0.07051	127.008
133	3968.36	99.88	65.3263	0.07318	65.2531					133	3918.15	98.62	126.762	0.07297	126.689
134	3965.89	99.82	65.3887	0.0598	65.3289					134	3930.01	98.92	126.984	0.00078	126.984
135	3691.69	92.92	77.3585	0.0666	77.2919					135	3959.05	99.65	127.025	0.07545	126.949
136	3878.31	97.62	78.1989	0.00102	78.1979					136	3963.09	99.75	127.02	0.07165	126.948
137	3926.9	98.84	74.5763	0.07125	74.5051					137	3839.36	96.64	127.033	0.07	126.963
138	3790	95.39	73.1227	0.06831	73.0544					138	3886.16	97.81	127.114	0.07345	127.04
139	3917.7	98.61	76.6702	0.07438	76.5958					139	3971.46	99.96	126.925	0.07451	126.851
140	3967.53	99.86	55.7912	0.07092	55.7203					140	3865.48	97.29	127.075	0.07255	127.003
141	3730.18	93.89	75.0838	0.0699	75.0139					141	3972.03	99.98	127.093	0.00069	127.092
142	3931.14	98.95	50.8141	0.07439	50.7398					142	3947.68	99.36	127.026	0.07083	126.955
143	3810.85	95.92	76.3962	0.07455	76.3217					143	3917.18	98.59	127.02	0.06993	126.95
144	3950.61	99.44	67.1704	0.07104	67.0994					144	3971.46	99.96	127.089	0.00031	127.089
145	3940.44	99.18	76.1518	0.07308	76.0788					145	3909.7	98.41	126.947	0.07129	126.875
146	3913.56	98.5	73.5986	0.07063	73.5279					146	3953.63	99.51	126.99	0.07084	126.919
147	3968.36	99.88	59.1942	0.07254	59.1217					147	3905.29	98.3	127.073	0.06958	127.003
148	3964.59	99.79	72.3762	0.07352	72.3027					148	3928.86	98.89	126.976	0.06998	126.906
149	3836.44	96.56	75.8733	0.07165	75.8016					149	3776.04	95.04	125.618	0.07105	125.547
150	3956.63	99.59	47.5965	0.073	47.5235					150	3778.88	95.11	127.126	0.07092	127.055
151	3887.19	97.84	68.57	0.07314	68.4969					151	3772.38	94.95	127.073	0.06411	127.009
152	3955.55	99.56	66.5352	0.06751	66.4677					152	3972.35	99.98	126.958	0.00027	126.958
153	3877.75	97.6	68.0712	0.06817	68.0031					153	3831.88	96.45	126.834	0.07117	126.763
154	3930.11	98.92	80.1734	0.07286	80.1005					154	3846.84	96.82	127.036	0.06723	126.969
155	3928.03	98.87	65.7028	0.0708	65.632					155	3931.13	98.95	126.95	0.07189	126.878
156	3924.29	98.77	74.5217	0.07387	74.4478					156	3917.74	98.61	127.062	0.00029	127.062
157	3930.08	98.92	57.6211	0.07113	57.55					157	3892.88	97.98	127.112	0.06836	127.044
158	3828.26	96.36	72.502	0.06867	72.4333					158	3922.35	98.72	126.36	0.04707	126.313
159	3971.85	99.97	68.0567	0.07052	67.9861					159	3921.83	98.71	126.936	0.06918	126.867
160	3881.22	97.69	68.8938	0.06942	68.8244					160	3832.05	96.45	127.065	0.07439	126.99
161	3881.51	97.7	77.6955	0.07393	77.6216					161	3951.37	99.46	126.959	0.07227	126.886
162	3933.2	99	72.9355	0.07498	72.8606					162	3963.19	99.75	126.997	0.00012	126.997
163	3823.21	96.23	65.6716	0.07129	65.6003					163	3947.14	99.35	126.99	0.00056	126.989
164	3940.44	99.18	5.92666	0.07134	5.85532					164	3856.69	97.07	126.83	0.06993	126.76
165	3781.73	95.19	58.3164	0.07174	58.2447					165	3958.8	99.64	126.775	0.06868	126.706
166	3846.69	96.82	68.878	0.0714	68.8066					166	3851.75	96.95	126.967	0.06972	126.898
167	3959.42	99.66	75.5119	0.01987	75.4921					167	3856.74	97.07	127.104	0.07271	127.031
168	3921.83	98.71	67.4979	0.07094	67.427					168	3809.66	95.89	127.103	0.07289	127.03
169	3972.35	99.98	54.1803	0.07236	54.1079					169	3937.47	99.11	125.695	0.07026	125.625
170	3912.53	98.48	64.654	0.0716	64.5824					170	3940.44	99.18	127.07	0.07041	127
171	3869.86	97.4	53.4612	0.06727	53.394					171	3949.23	99.4	126.922	0.07059	126.852
172	3838.05	96.6	71.0352	0.0711	70.9641					172	3943.55	99.26	127.087	0.07273	127.014
173	3968.88	99.9	64.2051	0.04086	64.1643					173	3864.64	97.27	127.093	0.07042	127.023
174	3940.44	99.18	65.121	0.06937	65.0517					174	3880.99	97.68	127.111	0.07337	127.038
175	3972.5	99.99	71.7512	0.01763	71.7336					175	3971.98	99.97	127.074	0.00033	127.074
176	3936.76	99.09	73.2816	0.07174	73.2098					176	3971.98	99.97	126.976	0.00017	126.975
177	3949.23	99.4	72.0835	0.06924	72.0143					177	3942.51	99.23	127.044	0.07402	126.97
178	3940.15	99.17	75.4835	0.07459	75.409					178	3965.78	99.82	126.883	0.00366	126.879
179	3946.5	99.33	74.4218	0.03358	74.3882					179	3958.62	99.64	126.861	0.07228	126.789
180	3852.2	96.96	65.7053	0.07179	65.6335					180	3972.35	99.98	126.921	0.00904	126.912
181	3955.95	99.57	77.1576	0.07114	77.0864					181	3889.25	97.89	126.985	0.06968	126.915
182	3900.28	98.17	79.1767	0.02213	79.1545					182	3938.09	99.12	126.829	0.00513	126.824
183	3952.33	99.48	71.3402	0.06891	71.2712					183	3863.78	97.25	126.919	0.07182	126.847
184	3596.39	90.52	77.8142	0.06964	77.7446					184	3919.82	98.66	127.084	0.0694	127.015
185	3788.76	95.36	72.7026	0.06869	72.6339					185	3827.56	96.34	127.055	0.07269	126.982
186	3832.39	96.46	71.6923	0.07023	71.6221					186	3909.42	98.4	126.999	0.00162	126.998
187	3933.57	99.01	74.0243	0.03457	73.9897					187	3911.22	98.44	126.945	0.0694	126.876
188	3962.33	99.73	59.2597	0.0698	59.1899					188	3863.37	97.24	127.101	0.07535	127.026
189	3951.76	99.47	75.4305	0.0682	75.3623					189	3962.16	99.73	127.009	0.00063	127.008
190	3934.24	99.02	70.7896	0.0747	70.7149					190	3904.43	98.27	127.064	0.06887	126.995
191	3933.72	99.01	71.151	0.07134	71.0797					191	3946.94	99.34	127.066	0.07422	126.992
192	3891.77	97.96	71.8724	0.06976	71.8027					192	3971.7	99.97	126.963	0.0009	126.962
193	3778.11	95.09	76.3275	0.06766	76.2599					193	3935.3	99.05	126.954	0.07148	126.882
194	3877.46	97.6	67.6003	0.06651	67.5338					194	3936.82	99.09	127.025	0.07071	126.955
195	3905.8	98.31	66.5155	0.07227	66.4432					195	3916.63	98.58	127.009	0.0732	126.936
196	3918.7	98.63	65.7542	0.00082	65.7534					196	3885.42	97.8	127.097	0.00017	127.097
197	3862.47	97.22	73.5632	0.02238	73.5408					197	3927.25	98.85	125.662	0.0692	125.593
198	3972.03	99.98	59.3487	0.03288	59.3158					198	3967.02	99.85	127.041	0.07061	126.971
199	3908.73	98.38	67.2153	0.06808	67.1472					199	3918.75	98.63	126.76	0.07346	126.687
200	3928.28	98.87	74.6367	0.07722	74.5595					200	3970.95	99.95	127.051	0.07107	126.98

## Sheet: 02_RBACO_Seeds(2)
Fast Converegnce Exp							Fast Converegnce Exp			Slow Converegnce Exp							Slow Converegnce Exp
#	CBLF	Quality	Taumax	Taumin	DeltaTauminmax		Global Optimal Solution =	3973.01		#	CBLF	Quality	Taumax	Taumin	DeltaTauminmax		Global Optimal Solution =	3973
1	3944.33	99.28	54.7206	0.06936	54.6512		Minimum Optimal Solution =	3461.38		1	3944.33	99.28	126.902	0.06936	126.832		Minimum Optimal Solution =	3658.12
2	3933.2	99	70.3828	0.07081	70.312		Mean of Optimal Solution =	3912.13		2	3873.85	97.5	127.037	0.07064	126.966		Mean of Optimal Solution =	3904.5
3	3926.8	98.84	74.4332	0.06625	74.367		Median of Optimal Solution =	3912.13		3	3794.08	95.5	127.077	0.07062	127.006		Median of Optimal Solution =	3904.5
4	3856.69	97.07	76.2914	0.07001	76.2214		Solution Standrad Deviation =	66.5873		4	3954.02	99.52	126.844	0.0725	126.772		Solution Standrad Deviation =	66.9786
5	3906.32	98.32	32.2021	0.0741	32.128		Average Price =	15.49		5	3949.23	99.4	127.038	0.0673	126.97		Average Price =	61.46
6	3887.71	97.85	77.4541	0.0725	77.3816		Relability =	5		6	3878.98	97.63	127.1	0.07476	127.025		Relability =	7.5
7	3971.98	99.97	54.9878	0.07422	54.9136		Normalized Price =	309.8		7	3970.73	99.94	127.046	0.00094	127.045		Normalized Price =	819.467
8	3937.34	99.1	70.7252	0.07177	70.6534		Average Solution Quality =	98.4678		8	3955.95	99.57	127.072	0.06648	127.005		Average Solution Quality =	98.2756
9	3959.05	99.65	75.1549	0.0712	75.0837		Average FDC =	-82.5647		9	3959.57	99.66	126.618	8e-05	126.617		Average FDC =	-26.6194
10	3732.61	93.95	67.7687	0.06987	67.6988		Correlation Coefficent =	-1		10	3873.78	97.5	126.121	0.07316	126.048		Correlation Coefficent =	-1
11	3968.47	99.89	65.9614	0.07114	65.8903		Solution Robustness =	58.7519		11	3763.11	94.72	127.108	0.07243	127.035		Solution Robustness =	58.2948
12	3925.45	98.8	47.5489	0.07026	47.4786		Performance Rate =	0.0032279		12	3957.83	99.62	127.09	0.07318	127.017		Performance Rate =	0.0012203
13	3951.99	99.47	54.6641	0.06621	54.5978		Average Elapsed Time =	1.1096		13	3931.31	98.95	127.051	0.00016	127.051		Average Elapsed Time =	2.8795
14	3962.16	99.73	70.1863	0.07299	70.1133					14	3927.06	98.84	126.877	0.06966	126.807
15	3461.38	87.12	77.5777	0.06893	77.5088					15	3929.72	98.91	127.087	0.06617	127.021
16	3949.75	99.41	60.9105	0.07022	60.8403					16	3784.6	95.26	127.076	0.07071	127.005
17	3816.15	96.05	60.767	0.07153	60.6955					17	3948.37	99.38	127.001	0.07392	126.927
18	3942.11	99.22	61.4274	0.07589	61.3515					18	3719.54	93.62	127.034	0.06982	126.965
19	3918.73	98.63	76.9532	0.07337	76.8799					19	3970.23	99.93	126.929	0.0687	126.86
20	3934.68	99.04	61.9892	0.07531	61.9139					20	3860.21	97.16	126.966	0.00232	126.963
21	3859.79	97.15	75.5922	0.07354	75.5187					21	3935.95	99.07	126.711	0.07226	126.638
22	3946.65	99.34	76.634	0.02196	76.6121					22	3885.12	97.79	126.899	0.07145	126.827
23	3904.13	98.27	47.8873	0.06939	47.8179					23	3963.77	99.77	127	0.07014	126.93
24	3917.02	98.59	73.033	0.07147	72.9615					24	3959.1	99.65	126.947	0.00033	126.947
25	3838.5	96.61	75.074	0.07251	75.0015					25	3957.5	99.61	126.892	0.00245	126.89
26	3972.03	99.98	76.3701	0.05426	76.3158					26	3868.06	97.36	127.089	0.06961	127.02
27	3937.45	99.1	77.1158	0.07063	77.0452					27	3937.45	99.1	126.784	0.00073	126.783
28	3738.3	94.09	75.7756	0.06989	75.7057					28	3912.31	98.47	127.062	0.07605	126.986
29	3955.95	99.57	72.9906	0.06648	72.9241					29	3971.46	99.96	127.044	0.00163	127.042
30	3930.61	98.93	54.9541	0.07015	54.8839					30	3693.84	92.97	127.095	0.06995	127.025
31	3886.11	97.81	69.881	0.07123	69.8098					31	3893.93	98.01	127.022	0.07168	126.95
32	3868.09	97.36	75.7419	0.0742	75.6677					32	3877.11	97.59	127.049	0.07281	126.977
33	3669.54	92.36	75.5058	0.07145	75.4343					33	3918.68	98.63	126.816	0.06978	126.747
34	3894.49	98.02	66.0798	0.06795	66.0119					34	3904.25	98.27	126.964	0.07107	126.893
35	3970.09	99.93	68.9304	0.07173	68.8587					35	3927.52	98.85	127.008	0.07092	126.937
36	3962.16	99.73	74.2995	0.05477	74.2448					36	3938.09	99.12	126.986	0.00041	126.985
37	3873.78	97.5	63.6108	0.07316	63.5376					37	3941.28	99.2	127.064	0.07045	126.994
38	3841.26	96.68	73.418	0.06831	73.3497					38	3941.77	99.21	127.022	0.06839	126.953
39	3949.23	99.4	76.3278	0.07342	76.2544					39	3794.2	95.5	127.086	0.06935	127.017
40	3876.85	97.58	75.6917	0.0706	75.6211					40	3847.7	96.85	127.074	0.07285	127.001
41	3949.23	99.4	55.389	0.06882	55.3201					41	3966.05	99.82	126.978	0.07346	126.905
42	3884.09	97.76	66.1041	0.06746	66.0367					42	3964.74	99.79	127.032	0.07407	126.958
43	3951.25	99.45	71.2519	0.07381	71.1781					43	3957.48	99.61	127.105	1e-05	127.105
44	3921.31	98.7	78.0873	0.07354	78.0138					44	3872.52	97.47	127.038	0.06787	126.97
45	3879.78	97.65	70.0184	0.06788	69.9505					45	3859.36	97.14	127.032	0.07285	126.959
46	3637.87	91.56	70.0174	0.04116	69.9763					46	3972.67	99.99	127.042	0.0003	127.042
47	3966.56	99.84	58.5524	0.06933	58.483					47	3862.7	97.22	127.096	0.07129	127.025
48	3953.86	99.52	71.6852	0.06664	71.6185					48	3729.97	93.88	127.11	0.07007	127.039
49	3871.17	97.44	79.5847	0.0721	79.5126					49	3787.58	95.33	127.08	0.07378	127.006
50	3944	99.27	51.9479	0.07331	51.8746					50	3871.68	97.45	127.079	0.0714	127.007
51	3956.95	99.6	71.8762	0.06951	71.8067					51	3964.59	99.79	127.092	0.00049	127.092
52	3918.21	98.62	77.9749	0.07481	77.9001					52	3938.09	99.12	126.967	0.00027	126.966
53	3877.3	97.59	73.7866	0.07106	73.7156					53	3881.51	97.7	127.089	0.0703	127.018
54	3874.27	97.51	68.2721	0.07148	68.2006					54	3711.41	93.42	127.09	0.06929	127.021
55	3885.21	97.79	45.0863	0.06961	45.0167					55	3968.18	99.88	127.05	0.07436	126.976
56	3963.09	99.75	72.7317	0.07021	72.6615					56	3970.41	99.93	127.066	0.00053	127.066
57	3927.82	98.86	66.8195	0.07293	66.7466					57	3971.98	99.97	126.085	0.07372	126.012
58	3929.72	98.91	74.8912	0.06617	74.825					58	3911.3	98.45	126.861	0.07043	126.79
59	3956.98	99.6	72.4825	0.06827	72.4142					59	3909.81	98.41	127.113	0.06574	127.048
60	3970.88	99.95	49.6662	0.06798	49.5982					60	3874.2	97.51	126.651	0.07244	126.578
61	3952.96	99.5	36.7489	0.07288	36.6761					61	3949.75	99.41	127.004	0.07056	126.933
62	3953.89	99.52	66.4239	0.07199	66.3519					62	3966.21	99.83	126.907	0.00214	126.904
63	3963.62	99.76	70.4753	0.0576	70.4177					63	3947.79	99.37	127.068	0.00032	127.068
64	3931.45	98.95	78.456	0.07197	78.384					64	3971.98	99.97	127.061	0.00041	127.061
65	3972.5	99.99	76.8818	0.07569	76.8061					65	3921.83	98.71	127.111	0.07263	127.039
66	3879.69	97.65	71.3102	0.07175	71.2385					66	3854.69	97.02	127.083	0.06971	127.014
67	3932.92	98.99	71.3909	0.03875	71.3521					67	3907.87	98.36	127.108	0.07272	127.035
68	3968.5	99.89	65.2633	0.07276	65.1905					68	3809.13	95.88	127.101	0.06816	127.033
69	3925.79	98.81	52.3008	0.07355	52.2272					69	3877.89	97.61	127.053	0.06925	126.984
70	3890.53	97.92	76.5542	0.06764	76.4866					70	3910.33	98.42	127.102	0.07206	127.03
71	3971.06	99.95	73.1972	0.03408	73.1631					71	3746.96	94.31	127.049	0.07126	126.978
72	3752.9	94.46	39.7232	0.06913	39.654					72	3904.81	98.28	126.753	0.00011	126.753
73	3966.21	99.83	66.4575	0.07115	66.3863					73	3839.69	96.64	126.992	0.07101	126.921
74	3950.52	99.43	71.1278	0.07303	71.0548					74	3957.3	99.6	126.841	0.07071	126.771
75	3920.28	98.67	79.4698	0.06629	79.4036					75	3958.78	99.64	126.93	0.00045	126.929
76	3953.28	99.5	58.0832	0.07394	58.0093					76	3887.71	97.85	127.134	0.00018	127.133
77	3945.64	99.31	70.6558	0.073	70.5828					77	3901.74	98.21	127.1	0.06761	127.033
78	3866.47	97.32	74.3271	0.0707	74.2564					78	3943.03	99.25	127.08	0.07421	127.005
79	3889.3	97.89	74.4739	0.0673	74.4066					79	3972.03	99.98	126.798	0.00013	126.798
80	3956.33	99.58	80.7462	0.07613	80.6701					80	3968.15	99.88	127.054	0.00032	127.054
81	3935.95	99.07	76.6284	0.07226	76.5561					81	3887.36	97.84	127.104	1e-05	127.104
82	3941.24	99.2	73.536	0.06607	73.4699					82	3658.12	92.07	127.059	0.0709	126.988
83	3865.75	97.3	75.0679	0.0701	74.9978					83	3846.58	96.82	127.086	0.0687	127.017
84	3960.19	99.68	73.4512	0.0725	73.3787					84	3942.76	99.24	126.895	0.07158	126.823
85	3931.37	98.95	71.4337	0.07076	71.363					85	3909.91	98.41	127.055	0.07387	126.981
86	3955.44	99.56	63.5623	0.07008	63.4922					86	3877.89	97.61	127.078	0.07255	127.005
87	3699.57	93.12	73.0855	0.07329	73.0122					87	3955.36	99.56	127.058	0.07235	126.986
88	3972.67	99.99	66.1772	0.03985	66.1374					88	3907.81	98.36	124.619	0.06891	124.55
89	3940.44	99.18	53.1469	0.06715	53.0797					89	3928.08	98.87	127.056	0.00065	127.055
90	3952.85	99.49	68.9899	0.07143	68.9185					90	3930.01	98.92	127.071	0.00064	127.07
91	3957.28	99.6	67.2049	0.073	67.1319					91	3818.43	96.11	127.084	0.07288	127.011
92	3840.88	96.67	77.291	0.07062	77.2204					92	3839.22	96.63	127.112	0.07151	127.041
93	3898.13	98.12	72.8535	0.07251	72.781					93	3960.24	99.68	126.946	0.07005	126.876
94	3954.92	99.54	72.6206	0.07139	72.5492					94	3879.55	97.65	127.056	0.07365	126.982
95	3940.44	99.18	58.9996	0.07365	58.9259					95	3936.94	99.09	127.021	0.07145	126.95
96	3877.37	97.59	69.7657	0.07088	69.6948					96	3875.72	97.55	127.053	0.00015	127.053
97	3956.99	99.6	75.488	0.07479	75.4132					97	3919.25	98.65	127.059	0.06913	126.99
98	3941.86	99.22	54.2398	0.0705	54.1693					98	3839.86	96.65	127.105	0.0703	127.035
99	3927.87	98.86	70.7888	0.07046	70.7183					99	3971.98	99.97	127.003	0.07443	126.928
100	3960.72	99.69	68.7158	0.0187	68.6971					100	3952.33	99.48	127.063	0.07095	126.992
101	3922.26	98.72	61.9874	0.07359	61.9138					101	3965.27	99.81	127.023	0.07144	126.951
102	3804.47	95.76	74.0227	0.07168	73.951					102	3858.36	97.11	127.059	0.06861	126.991
103	3868.12	97.36	80.2395	0.07374	80.1657					103	3887.51	97.85	127.107	0.07083	127.036
104	3941.65	99.21	69.365	0.07227	69.2928					104	3973	100	126.94	0.00047	126.94
105	3808.95	95.87	75.4814	0.06905	75.4123					105	3933.84	99.01	126.988	0.06885	126.919
106	3941.33	99.2	61.9461	0.07248	61.8736					106	3958.42	99.63	127.005	0.06955	126.935
107	3948.53	99.38	74.0503	0.07408	73.9762					107	3893.29	97.99	127.053	0.06925	126.984
108	3949.75	99.41	61.1345	0.07177	61.0627					108	3918.21	98.62	127.017	0.07126	126.946
109	3918.73	98.63	75.1535	0.07401	75.0794					109	3782.12	95.2	126.962	0.07053	126.892
110	3965.26	99.8	57.4281	0.07202	57.3561					110	3946.2	99.33	126.132	0.07009	126.062
111	3801.98	95.7	77.0068	0.07154	76.9352					111	3918.22	98.62	127.023	0.07225	126.951
112	3956.95	99.6	75.0844	0.07095	75.0135					112	3949.75	99.41	127.09	0.07081	127.019
113	3900.12	98.17	74.7832	0.0728	74.7104					113	3893.91	98.01	127.004	0.06691	126.937
114	3808.58	95.86	62.7564	0.072	62.6844					114	3925.45	98.8	127.04	0.0716	126.968
115	3903.32	98.25	76.0198	0.07429	75.9455					115	3940.44	99.18	127.052	0.07131	126.981
116	3904.25	98.27	55.493	0.07066	55.4223					116	3897.05	98.09	127.069	0.00018	127.069
117	3793.48	95.48	70.8297	0.07076	70.7589					117	3939.34	99.15	126.918	0.07056	126.847
118	3956.99	99.6	64.9347	0.05234	64.8823					118	3930.75	98.94	127.063	0.07227	126.991
119	3876.37	97.57	72.8487	0.07309	72.7756					119	3827.74	96.34	127.102	0.06691	127.035
120	3967.84	99.87	72.3262	0.07168	72.2545					120	3951.43	99.46	127.023	0.06948	126.953
121	3941.6	99.21	65.9911	0.06973	65.9214					121	3936.31	99.08	127.069	0.06952	127
122	3847.38	96.84	69.8441	0.07042	69.7737					122	3833.94	96.5	127.029	0.07054	126.958
123	3908.91	98.39	68.5834	0.06947	68.514					123	3960.01	99.67	127.024	0.07234	126.952
124	3964.59	99.79	54.0939	0.07086	54.0231					124	3670.06	92.37	127.122	0.07297	127.049
125	3952.46	99.48	59.8114	0.07324	59.7381					125	3962.77	99.74	126.992	0.07213	126.92
126	3945.2	99.3	69.5209	0.01919	69.5017					126	3968.88	99.9	127.071	0.0007	127.07
127	3959.68	99.66	72.8461	0.07153	72.7746					127	3941.99	99.22	127.026	0.00014	127.026
128	3917.7	98.61	72.5974	0.06947	72.528					128	3958.78	99.64	127.05	0.00069	127.049
129	3827.74	96.34	71.6031	0.07027	71.5329					129	3970.73	99.94	126.902	0.00024	126.901
130	3891.18	97.94	66.9481	0.0713	66.8768					130	3967.53	99.86	126.758	0.07152	126.687
131	3958.25	99.63	52.0862	0.07352	52.0127					131	3952.33	99.48	126.967	0.07408	126.893
132	3941.92	99.22	40.5144	0.06713	40.4473					132	3781.73	95.19	127.134	0.07194	127.062
133	3953.37	99.51	63.4744	0.06903	63.4054					133	3962.59	99.74	127.071	0.06987	127.001
134	3862.38	97.22	67.9325	0.07065	67.8619					134	3965.26	99.8	127.056	0.00031	127.056
135	3963.44	99.76	48.2021	0.07235	48.1297					135	3871.17	97.44	126.623	0.07235	126.551
136	3909.37	98.4	62.4179	0.07198	62.3459					136	3868.06	97.36	127.019	0.07415	126.945
137	3902.04	98.21	73.328	0.06937	73.2586					137	3905.8	98.31	127.028	0.07298	126.955
138	3973.01	100	73.4232	0.04289	73.3803					138	3949.75	99.41	127.057	0.06954	126.987
139	3914.87	98.54	77.2474	0.07585	77.1715					139	3912.22	98.47	127.037	0.07259	126.964
140	3938.09	99.12	62.0031	0.05197	61.9511					140	3951.76	99.47	127.094	0.07571	127.018
141	3968.36	99.88	67.6929	0.07595	67.6169					141	3913.55	98.5	127.041	0.07091	126.97
142	3926.23	98.82	64.0468	0.06735	63.9794					142	3958.78	99.64	127.036	0.00088	127.035
143	3931.77	98.96	68.6569	0.07603	68.5808					143	3956.98	99.6	126.895	0.07203	126.823
144	3768.28	94.85	58.8511	0.0036	58.8475					144	3956.47	99.58	126.99	0.0003	126.99
145	3892.85	97.98	66.6964	0.01743	66.679					145	3924.26	98.77	127.035	0.06872	126.966
146	3927.32	98.85	70.2751	0.06874	70.2064					146	3905.56	98.3	126.979	0.0701	126.909
147	3966.53	99.84	75.3645	0.00113	75.3634					147	3791.03	95.42	126.989	0.07113	126.918
148	3941.77	99.21	68.2215	0.06839	68.1531					148	3949.23	99.4	127.047	0.06939	126.978
149	3960.61	99.69	69.1654	0.07216	69.0932					149	3928.86	98.89	127.123	0.06975	127.053
150	3947.16	99.35	73.0922	0.06893	73.0233					150	3951.99	99.47	127.032	0.0008	127.032
151	3865.48	97.29	68.4957	0.06942	68.4263					151	3962.01	99.72	127.053	0.00033	127.053
152	3794.2	95.5	74.8008	0.06935	74.7315					152	3968.47	99.89	127.059	1e-05	127.059
153	3905.8	98.31	54.0207	0.07179	53.9489					153	3795.68	95.54	126.654	0.07015	126.584
154	3968.88	99.9	74.5484	0.0246	74.5238					154	3869.28	97.39	124.417	0.07163	124.346
155	3968.32	99.88	73.4867	0.07536	73.4113					155	3941.48	99.21	126.993	0.07138	126.921
156	3959.1	99.65	74.7473	0.00102	74.7463					156	3946.94	99.34	127.108	0.07186	127.036
157	3954.92	99.54	67.2808	0.07333	67.2074					157	3962.33	99.73	126.946	0.00027	126.946
158	3931.14	98.95	71.3515	0.07097	71.2806					158	3961.83	99.72	126.934	0.07281	126.861
159	3949.23	99.4	56.2245	0.07021	56.1543					159	3971.85	99.97	127.015	0.06779	126.947
160	3952.96	99.5	75.5673	0.04055	75.5268					160	3930.62	98.93	127.012	0.07459	126.937
161	3973	100	71.5852	0.07135	71.5139					161	3943.03	99.25	127.014	0.00071	127.013
162	3935.51	99.06	68.197	0.0726	68.1244					162	3942.55	99.23	127.044	0.068	126.976
163	3881.33	97.69	74.2637	0.07105	74.1926					163	3871.68	97.45	127.041	0.0717	126.969
164	3728.81	93.85	74.5614	0.07189	74.4895					164	3949.75	99.41	127.096	0.0003	127.096
165	3946.65	99.34	72.213	0.00113	72.2118					165	3926.46	98.83	126.851	0.0008	126.85
166	3884.09	97.76	79.3046	0.06695	79.2377					166	3931.77	98.96	127.017	0.07019	126.947
167	3936.31	99.08	62.8871	0.07196	62.8151					167	3895.08	98.04	127.052	0.07132	126.98
168	3879.85	97.66	63.2407	0.06936	63.1713					168	3818.89	96.12	127.107	0.07255	127.034
169	3908.02	98.36	49.3363	0.06967	49.2666					169	3882.28	97.72	126.958	0.07139	126.886
170	3945.85	99.32	66.6075	0.03297	66.5746					170	3890.3	97.92	127.026	0.0706	126.955
171	3945.85	99.32	65.8357	0.03842	65.7973					171	3895.78	98.06	126.899	0.0736	126.825
172	3873.61	97.5	76.0633	0.07217	75.9911					172	3843.28	96.73	127.051	0.07221	126.979
173	3850.44	96.91	71.3306	0.07024	71.2604					173	3813.26	95.98	126.963	0.067	126.896
174	3955.04	99.55	65.2995	0.0036	65.2959					174	3941.03	99.2	127.06	0.07141	126.989
175	3948.72	99.39	61.6	0.06881	61.5312					175	3818.96	96.12	127.107	0.06929	127.038
176	3944.03	99.27	75.0782	0.07107	75.0072					176	3922.7	98.73	127.069	0.06958	127
177	3948.07	99.37	65.475	0.0725	65.4025					177	3665.88	92.27	127.099	0.07026	127.029
178	3943.08	99.25	80.2158	0.07424	80.1415					178	3966.56	99.84	127.071	0.07169	126.999
179	3855.14	97.03	69.2771	0.0747	69.2024					179	3939.74	99.16	126.716	0.07139	126.645
180	3911.49	98.45	65.9999	0.07147	65.9284					180	3765.7	94.78	126.725	0.07172	126.653
181	3918.21	98.62	57.1613	0.07315	57.0882					181	3971.85	99.97	127.015	0.07063	126.945
182	3919.79	98.66	72.548	0.07221	72.4758					182	3941.6	99.21	127.067	0.07303	126.994
183	3962.68	99.74	57.2566	0.06945	57.1871					183	3868.58	97.37	127.022	0.0719	126.951
184	3878.4	97.62	60.4388	0.07171	60.3671					184	3965.24	99.8	127.074	1e-05	127.074
185	3960.51	99.69	64.63	0.07213	64.5578					185	3767.45	94.83	127.031	0.07249	126.958
186	3949.52	99.41	76.7293	0.07433	76.655					186	3882.9	97.73	127.065	0.07286	126.992
187	3912.15	98.47	54.6152	0.07307	54.5421					187	3894.43	98.02	127.103	0.07109	127.032
188	3903.88	98.26	68.863	0.07346	68.7895					188	3864.96	97.28	127.048	0.06777	126.981
189	3941.65	99.21	64.7158	0.06846	64.6473					189	3964.59	99.79	126.86	0.00149	126.858
190	3859.36	97.14	69.6176	0.07221	69.5454					190	3941.53	99.21	127.061	0.07153	126.99
191	3927.75	98.86	63.8537	0.06899	63.7847					191	3859.08	97.13	127.11	0.07257	127.038
192	3972.35	99.98	62.9885	0.07393	62.9145					192	3805.41	95.78	126.948	0.07088	126.877
193	3859.24	97.14	65.1833	0.06831	65.115					193	3970.41	99.93	127.036	0.00013	127.036
194	3919.91	98.66	75.4278	0.0742	75.3536					194	3942.94	99.24	127.069	0.00135	127.068
195	3900.42	98.17	74.3427	0.07277	74.27					195	3972.67	99.99	126.945	0.00019	126.945
196	3937.34	99.1	52.3261	0.07166	52.2544					196	3844.8	96.77	127.031	0.07043	126.96
197	3898.57	98.13	73.1281	0.07156	73.0566					197	3891	97.94	127.022	0.07193	126.951
198	3968.8	99.89	77.0586	0.02034	77.0382					198	3919.04	98.64	126.995	0.06872	126.926
199	3932.02	98.97	77.7722	0.07221	77.7					199	3954.92	99.54	126.982	0.07095	126.911
200	3962.16	99.73	70.308	0.0724	70.2356					200	3925.96	98.82	127.065	0.07374	126.991

## Sheet: 03_RBACO_Seeds(50)
Fast Converegnce Exp							Fast Converegnce Exp			Slow Converegnce Exp							Slow Converegnce Exp
#	CBLF	Quality	Taumax	Taumin	DeltaTauminmax		Global Optimal Solution =	3973.01		#	CBLF	Quality	Taumax	Taumin	DeltaTauminmax		Global Optimal Solution =	3973.01
1	3929.49	98.9	56.1464	0.07113	56.0753		Minimum Optimal Solution=	3561.95		1	3929.49	98.9	126.921	0.07113	126.85		Minimum Optimal Solution =	3422.92
2	3860.33	97.16	75.3565	0.07019	75.2863		Mean of Optimal Solution =	3907.96		2	3918.18	98.62	127.012	0.06821	126.944		Mean of Optimal Solution =	3902.93
3	3927.52	98.85	69.2511	0.07498	69.1762		Median of Optimal Solution =	3907.96		3	3952.85	99.49	126.997	0.07176	126.925		Median of Optimal Solution =	3902.93
4	3945.35	99.3	74.9638	0.07215	74.8917		Solution Standrad Deviation =	71.2769		4	3724.72	93.75	127.118	0.06933	127.048		Solution Standrad Deviation =	73.9796
5	3918.18	98.62	69.5449	0.06821	69.4767		Average Price =	15.455		5	3860.03	97.16	127.1	0.07064	127.029		Average Price =	61.645
6	3849.38	96.89	72.9435	0.07155	72.8719		Relability =	8.5		6	3912.53	98.48	127.1	0.06996	127.03		Relability =	5
7	3843.21	96.73	67.4326	0.06828	67.3643		Normalized Price =	181.823		7	3968.88	99.9	127.043	0.07258	126.971		Normalized Price =	1232.9
8	3956.51	99.58	74.3147	0.0036	74.3111		Average Solution Quality =	98.3627		8	3775.82	95.04	127.099	0.06939	127.03		Average Solution Quality =	98.236
9	3967.84	99.87	76.2847	0.06935	76.2154		Average FDC =	-82.2968		9	3943.68	99.26	126.811	0.06922	126.742		Average FDC =	-26.3397
10	3935.83	99.06	71.1025	0.04839	71.0541		Correlation Coefficent =	-1		10	3967.84	99.87	127.032	0.06956	126.963		Correlation Coefficent =	-1
11	3939.8	99.16	73.8485	0.07232	73.7762		Solution Robustness =	54.8279		11	3888.94	97.88	127.031	0.07184	126.959		Solution Robustness =	52.7568
12	3695.78	93.02	59.3765	0.06767	59.3088		Performance Rate =	0.0054998		12	3971.98	99.97	127.047	0.00024	127.046		Performance Rate =	0.0008111
13	3889.76	97.9	65.1389	0.07057	65.0684		Average Elapsed Time =	1.0176		13	3884.07	97.76	127.113	0.07435	127.039		Average Elapsed Time =	2.8753
14	3867.55	97.35	74.9733	0.06705	74.9063					14	3947.68	99.36	127.043	0.07097	126.972
15	3971.98	99.97	55.558	0.07343	55.4846					15	3939.93	99.17	127.067	0.06796	126.999
16	3962.66	99.74	69.8841	0.06866	69.8155					16	3895.36	98.05	127.048	0.06741	126.98
17	3711.31	93.41	77.2347	0.06972	77.1649					17	3877.72	97.6	127.056	0.06988	126.986
18	3971.98	99.97	70.5142	0.0646	70.4496					18	3894.61	98.03	127.021	0.07055	126.951
19	3872.26	97.46	61.881	0.07064	61.8103					19	3944.06	99.27	127.005	0.07053	126.935
20	3855.95	97.05	67.512	0.07249	67.4395					20	3953.28	99.5	126.962	0.00157	126.961
21	3956.33	99.58	69.1607	0.06996	69.0907					21	3691.25	92.91	124.466	0.07278	124.393
22	3942.06	99.22	60.7631	0.07263	60.6905					22	3906.07	98.32	127.01	0.07343	126.937
23	3860.13	97.16	71.4496	0.06903	71.3805					23	3952.33	99.48	126.967	0.07278	126.895
24	3952.33	99.48	72.9007	0.06741	72.8333					24	3876.34	97.57	127.064	0.07237	126.992
25	3926.15	98.82	67.8748	0.07114	67.8036					25	3625.59	91.26	127.083	0.06905	127.014
26	3953.4	99.51	71.6711	0.07114	71.5999					26	3877.33	97.59	127.088	0.0741	127.014
27	3921.83	98.71	76.8938	0.07497	76.8188					27	3886.16	97.81	126.211	0.07021	126.141
28	3964.92	99.8	62.8449	0.01444	62.8305					28	3970.41	99.93	126.9	0.00042	126.9
29	3904.77	98.28	62.3816	0.07428	62.3073					29	3941.42	99.2	126.771	0.07146	126.7
30	3968.88	99.9	78.3914	0.0726	78.3188					30	3890.9	97.93	126.921	0.07269	126.848
31	3895.85	98.06	76.4174	0.07359	76.3438					31	3890.81	97.93	127.056	0.07013	126.986
32	3955.57	99.56	75.4419	0.07273	75.3692					32	3875.2	97.54	127.013	0.07001	126.943
33	3968.88	99.9	72.997	0.02249	72.9745					33	3968.36	99.88	126.97	0.00046	126.969
34	3947.79	99.37	63.2296	0.05038	63.1792					34	3892.36	97.97	126.989	0.06977	126.92
35	3921.31	98.7	74.447	0.06661	74.3804					35	3948.2	99.38	126.947	0.07027	126.877
36	3921.31	98.7	68.8464	0.07379	68.7726					36	3958.6	99.64	127.099	0.07385	127.025
37	3895.47	98.05	78.4129	0.0756	78.3374					37	3967.33	99.86	127.083	0.07259	127.01
38	3927.7	98.86	72.0952	0.069	72.0262					38	3951.76	99.47	127.117	0.07537	127.041
39	3797.32	95.58	77.6238	0.07114	77.5526					39	3912.01	98.46	127.077	0.07357	127.003
40	3692.44	92.94	78.3881	0.07018	78.318					40	3856.45	97.07	127.097	0.07046	127.027
41	3971.06	99.95	31.6478	0.06886	31.579					41	3968.88	99.9	126.955	0.00071	126.954
42	3921.38	98.7	69.5225	0.07233	69.4501					42	3859.14	97.13	127.066	0.07051	126.995
43	3949.75	99.41	51.5305	0.00067	51.5298					43	3955.04	99.55	127.02	0.0752	126.945
44	3957.5	99.61	42.2364	0.06906	42.1674					44	3905.22	98.29	126.981	0.07088	126.91
45	3952.13	99.47	69.1856	0.06534	69.1202					45	3807.01	95.82	127.002	0.07042	126.932
46	3887.68	97.85	68.8761	0.0333	68.8428					46	3964.22	99.78	126.987	0.00036	126.986
47	3931.14	98.95	76.8666	0.071	76.7956					47	3820.5	96.16	127.1	0.06779	127.032
48	3705.12	93.26	76.7018	0.07267	76.6291					48	3786.57	95.31	127.111	0.07469	127.037
49	3972.5	99.99	61.7011	0.0538	61.6473					49	3874.78	97.53	127.055	0.06707	126.988
50	3952.99	99.5	77.7136	0.07402	77.6396					50	3952.33	99.48	127.134	0.07114	127.063
51	3968.36	99.88	69.2775	0.07178	69.2057					51	3931.95	98.97	126.977	0.00101	126.976
52	3938.86	99.14	60.4547	0.0701	60.3846					52	3906.84	98.33	127.019	0.07055	126.948
53	3931.14	98.95	60.0114	0.0741	59.9373					53	3939.39	99.15	126.988	0.00013	126.988
54	3970.41	99.93	65.9763	0.02457	65.9518					54	3962.66	99.74	127.078	0.00037	127.077
55	3956.33	99.58	74.6526	0.07154	74.5811					55	3875.3	97.54	127.004	0.06836	126.936
56	3941.48	99.21	77.5265	0.00113	77.5254					56	3954.69	99.54	126.981	0.07536	126.906
57	3830.84	96.42	74.9308	0.06901	74.8618					57	3881.86	97.71	126.876	0.00016	126.876
58	3954.51	99.53	71.0229	0.07449	70.9484					58	3833.96	96.5	126.999	0.07074	126.928
59	3692.61	92.94	76.5126	0.0717	76.4409					59	3918.4	98.63	127.111	0.07358	127.037
60	3965.26	99.8	74.8233	0.07231	74.7509					60	3944.79	99.29	127.106	0.072	127.034
61	3924.2	98.77	72.8993	0.07371	72.8256					61	3941.33	99.2	126.951	0.00057	126.95
62	3821.22	96.18	72.2795	0.07407	72.2054					62	3890.3	97.92	127.046	0.07132	126.975
63	3939.59	99.16	56.5607	0.06873	56.492					63	3951.14	99.45	126.994	0.07356	126.92
64	3966.88	99.85	69.9024	0.07324	69.8291					64	3880.99	97.68	127.101	0.06719	127.033
65	3958.54	99.64	71.3295	0.07334	71.2561					65	3925.76	98.81	126.99	0.06699	126.923
66	3972.03	99.98	59.4588	0.07481	59.384					66	3945.1	99.3	127.099	0.07039	127.029
67	3943.55	99.26	69.458	0.07153	69.3865					67	3958.78	99.64	126.806	0.00457	126.802
68	3972.35	99.98	63.0424	0.07327	62.9691					68	3941	99.19	126.928	0.00044	126.927
69	3970.41	99.93	61.7613	0.01611	61.7452					69	3920.98	98.69	126.862	0.07378	126.789
70	3940.96	99.19	63.2695	0.06962	63.1999					70	3915.63	98.56	127.039	0.07293	126.966
71	3952.13	99.47	66.0413	0.06944	65.9719					71	3888.23	97.87	127.087	0.07454	127.012
72	3952.85	99.49	73.7155	0.07235	73.6431					72	3921.56	98.71	127.041	0.06991	126.971
73	3923.38	98.75	73.5837	0.06892	73.5147					73	3871.32	97.44	127.051	0.07211	126.979
74	3947.16	99.35	64.5586	0.07144	64.4871					74	3936.82	99.09	126.726	0.06803	126.658
75	3956.47	99.58	69.736	0.07061	69.6654					75	3947.47	99.36	126.969	0.00048	126.969
76	3881.51	97.7	80.1396	0.07177	80.0679					76	3834.46	96.51	127.019	0.07127	126.947
77	3956.99	99.6	62.5419	0.03091	62.511					77	3949.41	99.41	126.758	0.00102	126.757
78	3966.24	99.83	59.3992	0.07232	59.3268					78	3953.43	99.51	127.037	0.06845	126.969
79	3970.95	99.95	71.0845	0.02688	71.0577					79	3951.46	99.46	126.996	0.07218	126.924
80	3907.73	98.36	65.5275	0.06845	65.459					80	3939.71	99.16	126.987	0.00037	126.986
81	3968.8	99.89	64.45	0.06778	64.3822					81	3970.09	99.93	127.005	0.00068	127.004
82	3912.24	98.47	77.0883	0.044	77.0443					82	3958.27	99.63	126.803	0.06908	126.734
83	3915.19	98.54	77.254	0.07059	77.1834					83	3928.49	98.88	126.973	0.06959	126.903
84	3925.75	98.81	73.397	0.07137	73.3257					84	3970.73	99.94	123.936	0.07678	123.859
85	3962.16	99.73	72.9149	0.073	72.8419					85	3853.65	97	127.129	0.07184	127.058
86	3875.3	97.54	75.1584	0.06983	75.0885					86	3960.72	99.69	127.036	1e-05	127.036
87	3910.62	98.43	69.4279	0.05288	69.375					87	3887.15	97.84	127.03	0.06994	126.96
88	3707.28	93.31	78.5313	0.07479	78.4565					88	3877.89	97.61	126.891	0.07143	126.819
89	3897.14	98.09	69.553	0.07516	69.4779					89	3825.67	96.29	127.101	0.07158	127.03
90	3897.02	98.09	76.3026	0.06937	76.2333					90	3970.95	99.95	127.027	1e-05	127.027
91	3948.72	99.39	78.5391	0.0751	78.464					91	3797.3	95.58	127.091	0.0672	127.024
92	3900.12	98.17	47.9265	0.07062	47.8558					92	3966.29	99.83	127.104	0.00018	127.104
93	3968.47	99.89	66.286	0.0155	66.2705					93	3947.79	99.37	126.904	0.00919	126.895
94	3851.35	96.94	56.0418	0.07183	55.97					94	3933.72	99.01	127.052	0.07031	126.981
95	3927.43	98.85	61.7616	0.0665	61.6951					95	3941.6	99.21	127.087	0.07437	127.013
96	3876.96	97.58	73.2555	0.06968	73.1859					96	3904.95	98.29	127.047	0.06933	126.978
97	3969.76	99.92	77.1256	0.03337	77.0922					97	3809.13	95.88	127.101	0.0718	127.029
98	3954.25	99.53	58.9868	0.05251	58.9343					98	3808.72	95.86	127.105	0.07064	127.034
99	3922.21	98.72	65.7771	0.06836	65.7087					99	3795.38	95.53	127.111	0.07364	127.038
100	3962.98	99.75	54.226	0.07062	54.1553					100	3951.67	99.46	126.811	0.00328	126.808
101	3877.42	97.59	72.6726	0.07453	72.5981					101	3845.74	96.8	127.062	0.07246	126.989
102	3904.76	98.28	78.008	0.07112	77.9369					102	3915.63	98.56	126.986	0.0739	126.912
103	3925.44	98.8	50.7208	0.07166	50.6491					103	3876.85	97.58	126.956	0.06946	126.887
104	3872.2	97.46	54.7479	0.04237	54.7055					104	3868.06	97.36	127.048	0.06832	126.98
105	3959.1	99.65	73.2832	0.00324	73.2799					105	3841.87	96.7	127.089	0.06447	127.024
106	3959.05	99.65	76.1621	0.07312	76.089					106	3923.88	98.76	127.043	0.00066	127.042
107	3962.45	99.73	71.4759	0.07438	71.4016					107	3861.78	97.2	127.023	0.06783	126.955
108	3951.02	99.45	66.3834	0.04037	66.3431					108	3866.59	97.32	127.008	0.06971	126.939
109	3916.39	98.57	64.2986	0.07436	64.2243					109	3943.55	99.26	127.015	0.0695	126.945
110	3852.84	96.98	73.9612	0.06898	73.8922					110	3719.17	93.61	127.07	0.07032	127
111	3930.78	98.94	67.7768	0.07101	67.7058					111	3908.04	98.36	127.003	0.00073	127.002
112	3970.41	99.93	51.1596	0.05369	51.1059					112	3950.49	99.43	126.907	0.07573	126.832
113	3906.75	98.33	75.3658	0.02275	75.343					113	3859.33	97.14	127.021	0.06985	126.951
114	3941.65	99.21	40.9298	0.06754	40.8622					114	3967.64	99.86	124.802	0.0705	124.731
115	3781.73	95.19	76.3245	0.07174	76.2528					115	3958.54	99.64	127.125	0.07189	127.053
116	3944.06	99.27	70.765	0.07241	70.6926					116	3905.88	98.31	127.061	0.07058	126.99
117	3926.47	98.83	59.8187	0.06843	59.7503					117	3966.29	99.83	126.973	0.00084	126.972
118	3952.33	99.48	56.0523	0.06956	55.9828					118	3952.66	99.49	126.986	0.0718	126.914
119	3954.37	99.53	67.9724	0.07335	67.8991					119	3964.27	99.78	127.044	0.00038	127.043
120	3758.76	94.61	73.587	0.06984	73.5171					120	3875.64	97.55	127.046	0.06998	126.976
121	3865.09	97.28	71.9545	0.06971	71.8848					121	3952.46	99.48	127.063	0.07052	126.992
122	3900.12	98.17	66.7336	0.03991	66.6937					122	3955.44	99.56	127.053	0.07446	126.979
123	3877.37	97.59	75.7742	0.07183	75.7024					123	3834.13	96.5	126.947	0.06601	126.881
124	3943.59	99.26	70.8281	0.05735	70.7708					124	3945.1	99.3	126.958	0.06966	126.888
125	3972.67	99.99	71.408	0.07344	71.3346					125	3831.36	96.43	127.049	0.0728	126.977
126	3844.08	96.75	76.0663	0.07072	75.9956					126	3964.74	99.79	127.093	0.06873	127.025
127	3665.18	92.25	69.8672	0.06766	69.7995					127	3964.74	99.79	127.033	0.00088	127.032
128	3732.28	93.94	60.9009	0.0722	60.8287					128	3860.28	97.16	127.08	0.07024	127.01
129	3933.2	99	74.3517	0.07132	74.2803					129	3967.5	99.86	127.019	0.00027	127.019
130	3964.74	99.79	71.922	0.07391	71.8481					130	3867.46	97.34	127.078	0.07096	127.007
131	3704.66	93.25	63.6608	0.0677	63.5931					131	3778.11	95.09	127.078	0.07341	127.005
132	3743.06	94.21	76.7624	0.07135	76.6911					132	3829.84	96.4	127.084	0.07388	127.01
133	3805.33	95.78	72.4038	0.07179	72.332					133	3973.01	100	126.985	0.00053	126.985
134	3849.97	96.9	65.8751	0.07252	65.8026					134	3966.86	99.85	126.897	0.00044	126.896
135	3899.92	98.16	76.4377	0.06619	76.3715					135	3958.25	99.63	127.036	0.07146	126.965
136	3937.86	99.12	79.877	0.07509	79.8019					136	3753.98	94.49	127.073	0.07257	127.001
137	3881.18	97.69	70.7744	0.06983	70.7045					137	3873.59	97.5	127.095	0.06995	127.025
138	3956.63	99.59	49.8496	0.07275	49.7768					138	3931.9	98.97	127.036	0.0694	126.966
139	3818.95	96.12	72.9688	0.07106	72.8978					139	3955.02	99.55	127.095	0.06976	127.025
140	3901.85	98.21	60.0186	0.07332	59.9452					140	3933.8	99.01	127.045	0.07684	126.968
141	3966.88	99.85	71.0196	0.06941	70.9502					141	3809.13	95.88	127.135	0.06517	127.07
142	3937.8	99.11	58.9462	0.07192	58.8743					142	3913.04	98.49	127.126	0.07149	127.054
143	3910.3	98.42	80.6445	0.0036	80.6409					143	3908.39	98.37	127.013	0.07384	126.939
144	3894.43	98.02	60.5329	0.06772	60.4652					144	3856.74	97.07	127.061	0.06845	126.993
145	3968.88	99.9	75.4572	0.07292	75.3843					145	3820.34	96.16	127.086	0.07316	127.013
146	3830.84	96.42	74.1604	0.07266	74.0878					146	3960.51	99.69	126.753	0.07181	126.681
147	3914.83	98.54	59.0248	0.07158	58.9532					147	3947.72	99.36	127.113	0.0689	127.044
148	3902.7	98.23	73.731	0.07316	73.6579					148	3939.71	99.16	126.947	0.00033	126.947
149	3848.54	96.87	66.0755	0.07026	66.0052					149	3894.47	98.02	126.857	0.00287	126.854
150	3925.97	98.82	67.4723	0.07528	67.397					150	3422.93	86.15	127.067	0.07061	126.996
151	3959.45	99.66	74.3856	0.07465	74.311					151	3893.91	98.01	127.111	0.07416	127.037
152	3955.04	99.55	68.8803	0.07071	68.8096					152	3811.82	95.94	127.014	0.07149	126.942
153	3901.67	98.2	80.1625	0.07282	80.0897					153	3605.93	90.76	127.073	0.07118	127.002
154	3919.61	98.66	53.9392	0.07275	53.8665					154	3919.47	98.65	127.07	0.07045	126.999
155	3909.42	98.4	72.3158	0.0708	72.245					155	3955.04	99.55	126.87	0.06809	126.802
156	3886.68	97.83	79.6547	0.07289	79.5819					156	3910.45	98.43	126.978	0.07051	126.908
157	3962.98	99.75	71.385	0.02049	71.3645					157	3939.93	99.17	127.071	0.07361	126.998
158	3923.38	98.75	76.4587	0.0737	76.385					158	3940.53	99.18	127.038	0.07068	126.967
159	3968.64	99.89	71.2814	0.07459	71.2069					159	3952.96	99.5	127.09	0.00017	127.09
160	3878.75	97.63	56.3754	0.07002	56.3054					160	3921.46	98.7	127.107	0.07298	127.034
161	3925.97	98.82	73.3095	0.07264	73.2369					161	3855.48	97.04	127.029	0.07125	126.957
162	3942.09	99.22	69.9836	0.06858	69.915					162	3928.03	98.87	127.014	0.07046	126.943
163	3973.01	100	66.3588	0.07429	66.2845					163	3927.52	98.85	126.795	0.07091	126.724
164	3865.48	97.29	81.1351	0.07055	81.0645					164	3931.75	98.96	127.092	0.07155	127.021
165	3907.23	98.34	71.3771	0.06865	71.3084					165	3937.77	99.11	126.848	1e-05	126.848
166	3923.9	98.76	76.6938	0.07242	76.6213					166	3933.57	99.01	127.111	0.00013	127.111
167	3894.64	98.03	61.3659	0.07053	61.2953					167	3927.52	98.86	127.116	0.07386	127.042
168	3945.11	99.3	72.4542	0.0721	72.3821					168	3944.06	99.27	127.059	0.07403	126.985
169	3949.75	99.41	74.8802	0.06758	74.8126					169	3880.8	97.68	127.059	0.07205	126.987
170	3676.51	92.54	64.2864	0.0716	64.2148					170	3756.39	94.55	127.034	0.06937	126.965
171	3880.99	97.68	55.8683	0.07034	55.7979					171	3955.22	99.55	127.067	1e-05	127.067
172	3768.78	94.86	79.9487	0.07014	79.8786					172	3965.26	99.8	126.945	0.0738	126.871
173	3917.06	98.59	71.8452	0.06816	71.777					173	3909.42	98.4	127.002	0.00163	127
174	3912.89	98.49	71.5156	0.07084	71.4447					174	3685.83	92.77	126.054	0.07157	125.983
175	3950.27	99.43	50.1741	0.06976	50.1043					175	3884.09	97.76	127.116	0.07235	127.044
176	3972.35	99.98	61.6753	0.07215	61.6031					176	3967.84	99.87	127.093	0.06939	127.024
177	3971.06	99.95	56.3597	0.04744	56.3122					177	3788.67	95.36	127.073	0.06946	127.003
178	3856.88	97.08	75.2299	0.07085	75.1591					178	3883.16	97.74	127.093	0.00017	127.093
179	3877.75	97.6	64.4144	0.07225	64.3421					179	3936.31	99.08	127.017	0.07009	126.947
180	3928.49	98.88	64.2847	0.07084	64.2138					180	3945.32	99.3	127.009	0.07003	126.939
181	3970.41	99.93	66.2656	0.07205	66.1936					181	3964.09	99.78	127.071	0.07174	127
182	3938.09	99.12	72.9096	0.01425	72.8953					182	3969.26	99.91	127.02	0.07408	126.946
183	3950.27	99.43	56.0096	0.06452	55.945					183	3907.82	98.36	127.084	0.06971	127.014
184	3972.35	99.98	75.6984	0.01952	75.6788					184	3880.99	97.68	127.117	0.06946	127.048
185	3968.15	99.88	50.879	0.05447	50.8245					185	3956.66	99.59	126.968	0.07288	126.895
186	3858.64	97.12	66.9473	0.06984	66.8774					186	3951.76	99.47	126.676	0.07246	126.603
187	3939.93	99.17	68.7956	0.06981	68.7257					187	3958.54	99.64	126.989	0.00055	126.989
188	3934.76	99.04	63.0782	0.0681	63.0101					188	3949.73	99.41	127.128	0.00017	127.127
189	3966.53	99.84	63.9359	0.05483	63.881					189	3919.39	98.65	127.066	0.07269	126.994
190	3561.95	89.65	77.6176	0.06912	77.5485					190	3968.36	99.88	127.113	0.0739	127.039
191	3952.57	99.49	72.2988	0.07407	72.2247					191	3784.93	95.27	127.002	0.07159	126.93
192	3901.99	98.21	69.0957	0.07489	69.0208					192	3923.88	98.76	127.045	0.00041	127.045
193	3852.04	96.96	71.5892	0.06998	71.5192					193	3969.14	99.9	126.966	0.06847	126.897
194	3967.97	99.87	59.1451	0.07052	59.0746					194	3933.2	99	126.842	0.00055	126.842
195	3918.21	98.62	77.5554	0.06809	77.4873					195	3957.19	99.6	127.041	0.07068	126.971
196	3911.49	98.45	59.8391	0.07149	59.7676					196	3970.73	99.94	127.05	0.0004	127.05
197	3843.92	96.75	77.6668	0.07097	77.5959					197	3954.02	99.52	126.909	0.07094	126.838
198	3956.13	99.58	66.8992	0.07671	66.8225					198	3874.78	97.53	127.098	0.07017	127.027
199	3834.97	96.53	76.4939	0.06836	76.4255					199	3921.83	98.71	127.067	0.07182	126.995
200	3962.27	99.73	72.9635	0.07081	72.8927					200	3972.03	99.98	126.982	0.00019	126.981

## Sheet: 04_RBACO_Seeds(75)
Fast Converegnce Exp							Fast Converegnce Exp			Slow Converegnce Exp							Slow Converegnce Exp
#	CBLF	Quality	Taumax	Taumin	DeltaTauminmax		Global Optimal Solution =	3972.5		#	CBLF	Quality	Taumax	Taumin	DeltaTauminmax		Global Optimal Solution =	3973.01
1	3847.38	96.84	71.2146	0.07199	71.1426		Minimum Optimal Solution =	3650.14		1	3847.38	96.84	127.058	0.07199	126.986		Minimum Optimal Solution =	3674.26
2	3958.45	99.63	74.6106	0.00113	74.6095		Mean of Optimal Solution =	3911.51		2	3931.66	98.96	126.993	0.06781	126.925		Mean of Optimal Solution =	3914.05
3	3966.86	99.85	75.5751	0.06988	75.5052		Median of Optimal Solution =	3911.51		3	3926.46	98.83	127.095	0.00016	127.095		Median of Optimal Solution =	3914.05
4	3893.54	98	75.9354	0.07072	75.8647		Solution Standrad Deviation =	64.4094		4	3828.13	96.35	125.302	0.06809	125.233		Solution Standrad Deviation =	61.1468
5	3930.01	98.92	48.8751	0.07254	48.8025		Average Price =	15.76		5	3833.8	96.5	126.98	0.07179	126.908		Average Price =	61.93
6	3958.48	99.63	68.4753	0.06915	68.4062		Relability =	6		6	3803.69	95.74	127.093	0.07058	127.022		Relability =	8.5
7	3968.18	99.88	75.6839	0.07164	75.6122		Normalized Price =	262.667		7	3923.38	98.75	127.054	0.00026	127.053		Normalized Price =	728.588
8	3926.47	98.83	67.2294	0.07154	67.1578		Average Solution Quality =	98.452		8	3934.76	99.04	126.958	0.07185	126.886		Average Solution Quality =	98.5159
9	3930.04	98.92	69.1627	0.07325	69.0894		Average FDC =	-81.2877		9	3963.19	99.75	127.012	0.07076	126.941		Average FDC =	-27.5329
10	3903.74	98.26	64.1748	0.071	64.1038		Correlation Coefficent =	-1		10	3968.47	99.89	126.976	0.00086	126.975		Correlation Coefficent =	-0.88386
11	3776.12	95.04	56.5686	0.06813	56.5005		Solution Robustness =	60.7288		11	3917.5	98.6	127.037	0.07201	126.965		Solution Robustness =	64.0107
12	3949.2	99.4	67.8265	0.07113	67.7554		Performance Rate =	0.0044416		12	3923.9	98.76	127.023	0.07429	126.949		Performance Rate =	0.0013725
13	3941.33	99.2	64.8547	0.06935	64.7853		Average Elapsed Time =	0.80277		13	3956.63	99.59	127.124	0.07092	127.053		Average Elapsed Time =	2.8889
14	3912.01	98.46	71.7987	0.07341	71.7253					14	3970.41	99.93	127.123	0.00029	127.123
15	3731.58	93.92	73.5725	0.07116	73.5014					15	3674.26	92.48	127.112	0.07195	127.04
16	3934.71	99.04	61.4741	0.07032	61.4038					16	3776.51	95.05	127.088	0.00029	127.088
17	3948.88	99.39	69.5439	0.07251	69.4714					17	3893.4	98	127.009	0.07398	126.935
18	3958.02	99.62	66.3609	0.07798	66.2829					18	3862.04	97.21	127.099	0.07246	127.026
19	3937.34	99.1	66.8385	0.07166	66.7668					19	3946.85	99.34	126.977	0.07061	126.906
20	3950.61	99.44	76.5863	0.07131	76.515					20	3880.47	97.67	127.077	0.0716	127.005
21	3914.83	98.54	71.6934	0.01603	71.6774					21	3908.48	98.38	127.086	0.07432	127.012
22	3959.68	99.66	64.289	0.07113	64.2179					22	3930.6	98.93	127.103	0.06784	127.035
23	3716.59	93.55	81.2559	0.06926	81.1866					23	3953.19	99.5	127.051	0.06908	126.982
24	3816.05	96.05	76.0539	0.06852	75.9854					24	3761.73	94.68	127.084	0.07207	127.012
25	3960.21	99.68	56.8842	0.06953	56.8147					25	3764.03	94.74	127.121	0.0706	127.051
26	3929.58	98.91	76.7662	0.07152	76.6946					26	3945.88	99.32	127.088	0.07039	127.018
27	3949.23	99.4	72.8998	0.07291	72.8269					27	3949.23	99.4	127.041	0.07297	126.968
28	3968.88	99.9	73.749	0.03695	73.712					28	3970.95	99.95	127.03	0.00137	127.028
29	3934.76	99.04	62.2306	0.07185	62.1588					29	3953.63	99.51	126.974	0.06667	126.907
30	3946.13	99.32	68.5007	0.0683	68.4324					30	3765.68	94.78	127.086	0.06487	127.021
31	3966.35	99.83	76.3331	0.07112	76.262					31	3894.29	98.02	127.003	0.07186	126.932
32	3967.18	99.85	34.6099	0.07159	34.5384					32	3918.21	98.62	127.058	0.07294	126.985
33	3814.88	96.02	67.725	0.06649	67.6585					33	3958.54	99.64	127.081	0.07207	127.009
34	3947.58	99.36	73.6067	0.0715	73.5352					34	3904.49	98.28	127.093	0.00047	127.093
35	3952.85	99.49	71.5344	0.07148	71.4629					35	3900.12	98.17	124.895	0.07389	124.821
36	3942.94	99.24	67.1873	0.06823	67.1191					36	3968.18	99.88	127.03	0.07179	126.958
37	3935.95	99.07	60.8023	0.07028	60.732					37	3856.69	97.07	127.079	0.07227	127.006
38	3926.48	98.83	68.9521	0.03825	68.9139					38	3967.84	99.87	126.992	0.00023	126.992
39	3942.39	99.23	56.952	0.07419	56.8779					39	3951.34	99.45	127.054	0.00045	127.053
40	3926.11	98.82	14.6101	0.07111	14.539					40	3961.64	99.71	127.064	0.07197	126.992
41	3947.14	99.35	72.945	0.03755	72.9074					41	3964.92	99.8	127.039	0.00015	127.039
42	3949.11	99.4	68.2305	0.06742	68.1631					42	3918.21	98.62	127.1	0.07058	127.029
43	3915.11	98.54	69.146	0.07397	69.072					43	3955.57	99.56	126.993	0.06783	126.925
44	3926.14	98.82	71.3106	0.02018	71.2904					44	3969.26	99.91	127.071	0.07168	126.999
45	3950.19	99.43	63.8377	0.06976	63.768					45	3781.79	95.19	126.714	0.07139	126.642
46	3904.97	98.29	67.0152	0.07326	66.942					46	3916.19	98.57	126.953	0.0654	126.888
47	3964.59	99.79	14.0481	0.07053	13.9775					47	3902.69	98.23	127.065	0.07039	126.995
48	3933.07	98.99	67.8658	0.07439	67.7914					48	3945.61	99.31	127.014	0.07243	126.942
49	3949.5	99.41	73.1919	0.07166	73.1202					49	3967.33	99.86	127.05	0.07456	126.975
50	3951.02	99.45	66.2576	0.03758	66.22					50	3941.56	99.21	126.928	0.06505	126.863
51	3887.19	97.84	70.0884	0.07323	70.0152					51	3924.54	98.78	127.106	0.07632	127.03
52	3799.82	95.64	68.9372	0.07009	68.8671					52	3970.43	99.94	126.961	0.00024	126.96
53	3967.84	99.87	79.1947	0.0036	79.1911					53	3928.35	98.88	126.864	0.07142	126.792
54	3872.38	97.47	70.1064	0.06695	70.0394					54	3952.46	99.48	127.021	0.07004	126.951
55	3886.16	97.81	79.1494	0.06809	79.0813					55	3886.65	97.83	127.096	0.06926	127.027
56	3883.48	97.75	78.7616	0.07259	78.689					56	3905.8	98.31	127.038	0.07061	126.967
57	3920.36	98.67	71.886	0.07292	71.8131					57	3965.89	99.82	127.002	0.00103	127.001
58	3930.62	98.93	65.5341	0.05758	65.4766					58	3867.76	97.35	126.964	0.06953	126.894
59	3943.03	99.25	72.1441	0.06991	72.0742					59	3972.67	99.99	126.906	0.00085	126.906
60	3951.67	99.46	75.5964	0.03697	75.5594					60	3928.17	98.87	127.049	0.07104	126.978
61	3838.08	96.6	55.6461	0.06883	55.5773					61	3952.48	99.48	127.078	0.07611	127.002
62	3939.48	99.16	72.158	0.07097	72.087					62	3883.57	97.75	127.067	0.07094	126.997
63	3950.84	99.44	66.6997	0.07077	66.6289					63	3936.94	99.09	127.107	0.07101	127.035
64	3891.03	97.94	71.427	0.06837	71.3586					64	3931.14	98.95	126.944	0.0724	126.872
65	3853.26	96.99	72.9036	0.07501	72.8286					65	3972.67	99.99	127.001	0.00028	127.001
66	3951.67	99.46	70.1421	0.06676	70.0753					66	3901.67	98.2	127.118	0.07194	127.046
67	3969.39	99.91	72.228	0.00082	72.2272					67	3959.68	99.66	127.046	0.06905	126.977
68	3874.78	97.53	65.9057	0.07027	65.8354					68	3963	99.75	127.106	0.06772	127.038
69	3927.52	98.85	52.7483	0.07077	52.6775					69	3942.18	99.22	127.041	0.07038	126.97
70	3893.91	98.01	82.4583	0.07372	82.3846					70	3963.3	99.76	127.092	0.00138	127.091
71	3737.76	94.08	77.4638	0.07086	77.3929					71	3889.04	97.89	127.057	0.0718	126.985
72	3650.14	91.87	74.0664	0.06865	73.9977					72	3922.38	98.73	127.052	0.07211	126.98
73	3813.11	95.98	71.2731	0.07163	71.2015					73	3965.78	99.82	126.955	0.00847	126.947
74	3924.61	98.78	62.6267	0.06733	62.5594					74	3937.45	99.1	126.831	0.00124	126.83
75	3941.6	99.21	53.2059	0.06765	53.1382					75	3962.77	99.74	127.009	0.07451	126.935
76	3927.52	98.85	71.0477	0.07524	70.9725					76	3944.7	99.29	127.004	0.07148	126.932
77	3726.84	93.8	77.461	0.06856	77.3925					77	3960.39	99.68	127.047	0.00044	127.047
78	3778.34	95.1	75.8258	0.07018	75.7557					78	3972.35	99.98	127.092	0.00012	127.092
79	3953.28	99.5	71.4097	0.07097	71.3387					79	3961.83	99.72	126.993	0.07115	126.922
80	3972.5	99.99	65.6352	0.07088	65.5644					80	3924.29	98.77	126.924	0.07154	126.853
81	3861.86	97.2	76.4029	0.07048	76.3325					81	3958.54	99.64	126.963	0.00028	126.962
82	3940.77	99.19	65.9437	0.0715	65.8722					82	3905.02	98.29	127.086	0.07178	127.014
83	3938.83	99.14	76.6162	0.07299	76.5432					83	3966.53	99.84	127.063	0.00023	127.063
84	3755.58	94.53	66.26	0.0707	66.1893					84	3970.41	99.93	127.091	0.00017	127.091
85	3931.65	98.96	56.4899	0.04675	56.4431					85	3679.7	92.62	127.012	0.06969	126.943
86	3934.98	99.04	74.9124	0.07248	74.84					86	3925.66	98.81	127.039	0.07126	126.967
87	3957.16	99.6	58.8044	0.07234	58.732					87	3805.76	95.79	127.086	0.0671	127.019
88	3840.66	96.67	68.9535	0.06788	68.8857					88	3895.08	98.04	127.056	0.06951	126.986
89	3941.65	99.21	71.3664	0.06551	71.3009					89	3947.31	99.35	127.073	0.07136	127.002
90	3944.67	99.29	73.7003	0.073	73.6273					90	3958.54	99.64	127.098	0.00015	127.097
91	3932.28	98.97	72.8359	0.0632	72.7727					91	3958.78	99.64	127.096	1e-05	127.096
92	3948.2	99.38	72.7383	0.07374	72.6645					92	3937.45	99.1	123.871	2e-05	123.87
93	3896.72	98.08	64.2451	0.07174	64.1734					93	3909.93	98.41	127.029	0.068	126.961
94	3959.05	99.65	68.9899	0.06978	68.9201					94	3850.22	96.91	127.133	0.07369	127.059
95	3916.07	98.57	56.8869	0.0709	56.816					95	3961.12	99.7	127.034	0.07196	126.962
96	3781.09	95.17	74.0982	0.07055	74.0277					96	3906.71	98.33	126.993	0.07224	126.921
97	3965.78	99.82	58.7851	0.07201	58.7131					97	3912.15	98.47	127.101	0.06979	127.032
98	3908.39	98.37	76.9559	0.07446	76.8814					98	3892.88	97.98	127.009	0.07104	126.938
99	3963.62	99.76	58.6196	0.07007	58.5496					99	3875.69	97.55	127.01	0.06711	126.943
100	3898.16	98.12	72.7216	0.07008	72.6515					100	3902.19	98.22	127.043	0.07065	126.972
101	3950.7	99.44	64.6556	0.06349	64.5921					101	3973	100	126.954	0.00027	126.954
102	3935.78	99.06	73.3795	0.07307	73.3065					102	3881.34	97.69	126.948	0.06962	126.878
103	3741.92	94.18	78.238	0.07069	78.1673					103	3874.43	97.52	127.123	0.00016	127.122
104	3970.73	99.94	71.6445	0.07091	71.5736					104	3830.8	96.42	127.115	0.00014	127.115
105	3749.67	94.38	74.869	0.07108	74.798					105	3861.74	97.2	126.493	0.07364	126.42
106	3950.27	99.43	61.4653	0.07185	61.3935					106	3965.24	99.8	126.732	0.00289	126.729
107	3922.35	98.72	72.7027	0.0543	72.6484					107	3957.28	99.6	127.049	0.07047	126.979
108	3970.41	99.93	51.494	0.04723	51.4468					108	3882.16	97.71	127.097	0.07019	127.027
109	3861.86	97.2	62.8087	0.07021	62.7385					109	3937.34	99.1	127.053	0.07095	126.982
110	3954.92	99.54	75.4999	0.07241	75.4275					110	3941.77	99.21	127.091	0.07142	127.019
111	3852.55	96.97	65.0014	0.0724	64.929					111	3872.25	97.46	127.04	0.07059	126.97
112	3896.32	98.07	75.553	0.06932	75.4837					112	3870.88	97.43	127.066	0.00056	127.066
113	3868.99	97.38	64.7089	0.07093	64.638					113	3972.03	99.98	127.005	0.00058	127.005
114	3929.19	98.9	76.4876	0.07072	76.4169					114	3952.75	99.49	126.932	0.07089	126.861
115	3899.08	98.14	77.9254	0.07276	77.8526					115	3916.21	98.57	126.981	0.06608	126.915
116	3943.91	99.27	69.825	0.06991	69.7551					116	3944.65	99.29	127.084	0.07084	127.013
117	3960.72	99.69	75.1037	0.01282	75.0908					117	3952.85	99.49	127.115	1e-05	127.115
118	3969.91	99.92	65.0071	0.0702	64.9369					118	3932.55	98.98	126.936	0.07133	126.865
119	3918.21	98.62	71.1922	0.07294	71.1192					119	3821.53	96.19	127.054	0.06778	126.986
120	3970.73	99.94	74.6087	0.04383	74.5649					120	3902.68	98.23	126.939	0.06977	126.87
121	3688.87	92.85	18.7456	0.07141	18.6742					121	3945	99.29	126.973	0.07083	126.902
122	3924.93	98.79	69.5397	0.07325	69.4664					122	3869.1	97.38	127.023	0.07221	126.951
123	3959.57	99.66	79.7783	0.07198	79.7064					123	3968.36	99.88	126.93	0.00065	126.929
124	3891.34	97.94	75.2233	0.07426	75.149					124	3963.42	99.76	126.964	0.07303	126.891
125	3940.44	99.18	75.0404	0.07016	74.9703					125	3971.46	99.96	127.092	0.00034	127.092
126	3958.8	99.64	38.6925	0.0706	38.6219					126	3828.77	96.37	126.99	0.07063	126.919
127	3904.49	98.28	75.7052	0.06032	75.6449					127	3803.44	95.73	127.087	0.06865	127.019
128	3927.17	98.85	72.8029	0.06702	72.7359					128	3866	97.31	126.707	0.06984	126.637
129	3949.23	99.4	71.8034	0.07401	71.7294					129	3950.27	99.43	127.101	0.00017	127.101
130	3970.73	99.94	59.404	0.03076	59.3732					130	3942.51	99.23	126.589	0.07233	126.517
131	3970.09	99.93	73.7686	0.05803	73.7106					131	3904.25	98.27	126.838	0.07232	126.766
132	3969.39	99.91	57.6654	0.07272	57.5926					132	3884.27	97.77	127.069	0.07107	126.998
133	3937.12	99.1	78.2444	0.03695	78.2075					133	3703.66	93.22	127.08	0.06807	127.012
134	3955.02	99.55	69.3848	0.07231	69.3125					134	3947.29	99.35	127.083	0.06935	127.013
135	3902.76	98.23	75.4935	0.07091	75.4226					135	3798.27	95.6	126.847	0.06894	126.778
136	3881.98	97.71	71.9285	0.07063	71.8578					136	3955.95	99.57	127.065	0.0748	126.99
137	3965.78	99.82	72.3629	0.04888	72.314					137	3932.63	98.98	127.054	0.07066	126.983
138	3793.1	95.47	75.6195	0.07326	75.5462					138	3760.91	94.66	127.087	0.06707	127.02
139	3968.88	99.9	67.9902	0.02204	67.9682					139	3918.42	98.63	126.963	0.07197	126.891
140	3931.14	98.95	64.4068	0.07265	64.3342					140	3939.41	99.15	127.096	0.0702	127.026
141	3760.46	94.65	73.1468	0.06875	73.0781					141	3960.42	99.68	127.049	0.06873	126.98
142	3915.68	98.56	71.9017	0.0722	71.8295					142	3949.41	99.41	127.005	0.00046	127.004
143	3771.9	94.94	72.713	0.06906	72.6439					143	3931.13	98.95	127.014	0.06977	126.944
144	3936.07	99.07	74.0728	0.07052	74.0023					144	3970.41	99.93	127.056	0.00016	127.055
145	3955.95	99.57	76.1972	0.04246	76.1548					145	3934.98	99.04	126.892	0.06858	126.823
146	3965.26	99.8	78.9245	0.02075	78.9038					146	3965.26	99.8	127.023	0.00032	127.022
147	3890.86	97.93	70.8092	0.07348	70.7357					147	3934.49	99.03	127.073	0.06957	127.004
148	3956.45	99.58	78.5837	0.07076	78.5129					148	3951.02	99.45	126.199	0.00088	126.198
149	3965.78	99.82	77.4461	0.04023	77.4058					149	3933.21	99	127.094	0.07065	127.024
150	3949.23	99.4	71.6102	0.07322	71.537					150	3853.07	96.98	127.096	0.07343	127.022
151	3972.35	99.98	44.0707	0.06968	44.0011					151	3968.29	99.88	127.076	0.06989	127.006
152	3970.95	99.95	60.193	0.05265	60.1404					152	3955.87	99.57	127.024	0.00015	127.024
153	3948.72	99.39	66.9362	0.07251	66.8637					153	3885.38	97.79	125.296	0.0703	125.226
154	3963.09	99.75	63.9217	0.07054	63.8511					154	3929.6	98.91	126.942	0.074	126.868
155	3972.5	99.99	64.4666	0.07434	64.3922					155	3924.42	98.78	126.876	0.07062	126.805
156	3947.49	99.36	61.8009	0.0714	61.7295					156	3939.59	99.16	127.033	0.06571	126.967
157	3883.43	97.75	68.4489	0.07213	68.3768					157	3912.41	98.47	126.7	0.06898	126.631
158	3941	99.19	70.3249	0.06644	70.2584					158	3949.23	99.4	127.084	0.07021	127.014
159	3874.2	97.51	50.5326	0.07199	50.4606					159	3801.89	95.69	127.079	0.06805	127.011
160	3718.02	93.58	75.6247	0.00113	75.6235					160	3893.27	97.99	127.052	0.07389	126.978
161	3887.19	97.84	79.7264	0.06931	79.6571					161	3922.35	98.72	127.083	0.07315	127.01
162	3828.26	96.36	75.971	0.07383	75.8972					162	3948.9	99.39	127.017	0.07012	126.947
163	3967.33	99.86	70.3132	0.06797	70.2452					163	3835.79	96.55	126.941	0.07055	126.871
164	3955.04	99.55	75.0354	0.07539	74.96					164	3973.01	100	127.035	0.00087	127.034
165	3955.44	99.56	60.7783	0.04152	60.7368					165	3927.84	98.86	126.971	0.07053	126.901
166	3963.95	99.77	67.0209	0.03884	66.982					166	3970.09	99.93	127.008	0.00055	127.007
167	3892	97.96	71.8136	0.06619	71.7474					167	3953.89	99.52	127.091	0.06641	127.024
168	3936.31	99.08	75.3143	0.07126	75.2431					168	3933.52	99.01	125.608	0.06858	125.54
169	3852.55	96.97	81.1303	0.07319	81.0571					169	3953.28	99.5	127.065	0.00115	127.064
170	3949.23	99.4	69.0207	0.06933	68.9514					170	3910.78	98.43	127.093	0.07026	127.022
171	3774.49	95	76.6144	0.07103	76.5433					171	3899.64	98.15	126.985	0.00046	126.984
172	3967.18	99.85	55.4429	0.03029	55.4126					172	3955.95	99.57	127.087	0.06931	127.017
173	3902.7	98.23	62.1401	0.06885	62.0712					173	3949.75	99.41	126.978	0.00052	126.977
174	3951.16	99.45	71.9725	0.06915	71.9033					174	3886.79	97.83	127.084	0.07499	127.009
175	3900.89	98.18	68.0813	0.07017	68.0111					175	3969.91	99.92	126.928	0.00118	126.927
176	3910.83	98.44	67.2781	0.06958	67.2085					176	3745.02	94.26	127.099	0.07002	127.029
177	3937.86	99.12	70.4697	0.07133	70.3983					177	3945.35	99.3	126.929	0.07044	126.859
178	3852.55	96.97	71.4324	0.07541	71.357					178	3917.7	98.61	126.866	0.07091	126.795
179	3933.07	98.99	70.4792	0.07071	70.4085					179	3893.46	98	126.417	0.07293	126.344
180	3959.05	99.65	70.9294	0.06971	70.8597					180	3901.59	98.2	127.018	0.07062	126.948
181	3906.75	98.33	69.9682	0.07084	69.8974					181	3784.91	95.27	126.915	0.0694	126.846
182	3932.23	98.97	62.4742	0.06953	62.4046					182	3684.26	92.73	127.105	0.07175	127.033
183	3934.76	99.04	65.4995	0.07051	65.429					183	3925.66	98.81	127.027	0.06975	126.957
184	3947.17	99.35	75.7656	0.07109	75.6945					184	3960.74	99.69	127.087	0.07285	127.014
185	3896.89	98.08	67.8825	0.07086	67.8116					185	3811.18	95.93	126.988	0.07127	126.916
186	3912.37	98.47	58.3536	0.07143	58.2821					186	3954.92	99.54	127.03	0.07123	126.959
187	3945.53	99.31	77.034	0.02371	77.0103					187	3961.94	99.72	127.04	0.07219	126.968
188	3860.09	97.16	67.815	0.06648	67.7486					188	3965.26	99.8	127.1	0.06895	127.031
189	3790.42	95.4	63.0238	0.07425	62.9496					189	3920.34	98.67	127.002	0.07016	126.931
190	3940.38	99.18	44.5272	0.06701	44.4602					190	3949.23	99.4	127.035	0.07221	126.962
191	3948.72	99.39	73.5977	0.07135	73.5264					191	3970.95	99.95	127.083	1e-05	127.083
192	3942.44	99.23	54.1097	0.06886	54.0409					192	3927.04	98.84	127.059	0.07228	126.986
193	3907.41	98.35	63.7161	0.07351	63.6426					193	3836.51	96.56	126.135	0.07162	126.063
194	3953.89	99.52	75.5993	0.06986	75.5295					194	3928.98	98.89	127.048	0.0711	126.977
195	3933.22	99	71.9056	0.06683	71.8388					195	3939.98	99.17	126.943	0.07455	126.869
196	3827.74	96.34	78.5403	0.07076	78.4695					196	3963.71	99.77	127.056	0.07114	126.985
197	3843.84	96.75	71.585	0.07346	71.5115					197	3956.98	99.6	127.076	0.07095	127.006
198	3964.74	99.79	67.2958	0.07272	67.2231					198	3972.67	99.99	127.112	0.00029	127.111
199	3900.75	98.18	72.8668	0.07317	72.7936					199	3925.45	98.8	127	0.0011	126.999
200	3958.92	99.65	74.8045	0.07103	74.7335					200	3953.31	99.5	126.993	0.07374	126.919

## Sheet: 05_RBACO_Seeds(111)
Fast Converegnce Exp							Fast Converegnce Exp			Slow Converegnce Exp							Slow Converegnce Exp
#	CBLF	Quality	Taumax	Taumin	DeltaTauminmax		Global Optimal Solution =	3973		#	CBLF	Quality	Taumax	Taumin	DeltaTauminmax		Global Optimal Solution =	3973
1	3955.22	99.55	70.9206	0.02008	70.9006		Minimum Optimal Solution=	3776.1		1	3955.22	99.55	127.056	0.00016	127.055		Minimum Optimal Solution =	3616.29
2	3810.68	95.91	69.7991	0.07071	69.7284		Mean of Optimal Solution =	3921.36		2	3892.94	97.98	127.081	0.07025	127.011		Mean of Optimal Solution =	3912.76
3	3949.17	99.4	73.3405	0.06732	73.2732		Median of Optimal Solution =	3921.36		3	3922.38	98.73	126.99	0.0762	126.913		Median of Optimal Solution =	3912.76
4	3966.86	99.85	75.1618	0.02052	75.1413		Solution Standrad Deviation=	47.6594		4	3949.43	99.41	127.063	0.06919	126.994		Solution Standrad Deviation =	62.2724
5	3881.03	97.68	64.1425	0.0697	64.0728		Average Price =	15.75		5	3958.54	99.64	127.034	0.06858	126.965		Average Price =	61.675
6	3815.29	96.03	68.7956	0.04768	68.7479		Relability =	9.5		6	3953.37	99.51	126.519	0.03072	126.488		Relability =	8
7	3898.34	98.12	79.3392	0.02038	79.3188		Normalized Price =	165.79		7	3912.19	98.47	127.002	0.06851	126.933		Normalized Price =	770.938
8	3973	100	66.2191	0.05442	66.1647		Average Solution Quality =	98.7001		8	3856.3	97.06	127.104	0.06852	127.035		Average Solution Quality =	98.4835
9	3952.8	99.49	62.996	0.07069	62.9253		Average FDC =	-93.0594		9	3837.8	96.6	127.085	0.07019	127.015		Average FDC =	-28.0327
10	3943.06	99.25	73.6259	0.07003	73.5558		Correlation Coefficent =	-1		10	3925.45	98.8	126.974	0.00087	126.973		Correlation Coefficent =	-0.89751
11	3918.87	98.64	66.4337	0.07132	66.3624		Solution Robustness =	82.2789		11	3875.2	97.54	126.997	0.06815	126.929		Solution Robustness =	62.833
12	3842.77	96.72	69.2234	0.071	69.1525		Performance Rate =	0.0060317		12	3868.58	97.37	127.061	0.06714	126.993		Performance Rate =	0.0012971
13	3949.43	99.41	71.9108	0.06919	71.8416		Average Elapsed Time =	0.8028		13	3973	100	127.045	0.00042	127.045		Average Elapsed Time =	2.8697
14	3834.46	96.51	78.697	0.07049	78.6265					14	3958.57	99.64	126.983	0.07159	126.912
15	3906.4	98.32	80.0373	0.0704	79.9669					15	3972.67	99.99	126.993	0.00051	126.993
16	3909.08	98.39	65.955	0.07153	65.8835					16	3964.94	99.8	126.399	0.07085	126.329
17	3958.54	99.64	75.2946	0.06858	75.226					17	3949.87	99.42	127.136	0.07151	127.065
18	3962.67	99.74	61.6121	0.05305	61.559					18	3964.27	99.78	126.98	0.00074	126.979
19	3894.47	98.02	77.9062	0.07337	77.8328					19	3943.55	99.26	127.054	0.0722	126.982
20	3859.8	97.15	63.5714	0.07123	63.5002					20	3971.46	99.96	126.958	0.00046	126.958
21	3963.19	99.75	61.2733	0.07013	61.2031					21	3968.88	99.9	127.083	1e-05	127.083
22	3966.53	99.84	69.8516	0.05965	69.792					22	3900.64	98.18	127.088	0.06908	127.019
23	3776.1	95.04	73.7879	0.07223	73.7157					23	3943.06	99.25	127.006	0.07437	126.932
24	3941.48	99.21	69.6034	0.07145	69.532					24	3809.13	95.88	127.107	0.07009	127.037
25	3919.76	98.66	76.0695	0.02183	76.0477					25	3925.97	98.82	126.973	0.0703	126.903
26	3949.23	99.4	69.9288	0.07454	69.8543					26	3824.03	96.25	126.951	0.06713	126.884
27	3955.22	99.55	54.2676	0.07302	54.1946					27	3955.25	99.55	127.085	0.0745	127.01
28	3932.16	98.97	78.9378	0.07223	78.8655					28	3956.84	99.59	127.03	0.00057	127.03
29	3856.3	97.06	77.0849	0.06852	77.0163					29	3957.16	99.6	127	0.00063	126.999
30	3917.26	98.6	68.9086	0.06858	68.84					30	3972.35	99.98	127.043	0.00013	127.042
31	3962.16	99.73	77.3574	0.077	77.2804					31	3832.99	96.48	126.981	0.06908	126.912
32	3938.83	99.14	70.0492	0.07095	69.9782					32	3936.11	99.07	126.717	0.07241	126.645
33	3956.47	99.58	59.4259	0.07067	59.3552					33	3937.34	99.1	127.012	0.01097	127.001
34	3958.13	99.63	77.5755	0.03926	77.5363					34	3961.36	99.71	126.931	0.00023	126.931
35	3960.39	99.68	63.2914	0.07046	63.221					35	3964.27	99.78	127.068	0.00016	127.067
36	3968.15	99.88	69.06	0.00082	69.0592					36	3948.9	99.39	121.642	0.07437	121.568
37	3937.12	99.1	60.8366	0.07082	60.7658					37	3915.94	98.56	127.073	0.07009	127.003
38	3970.41	99.93	62.9877	0.06772	62.92					38	3960.56	99.69	127.034	0.07192	126.962
39	3884.09	97.76	72.5029	0.06817	72.4347					39	3887.45	97.85	127.055	0.07153	126.983
40	3871.68	97.45	77.7944	0.0725	77.7219					40	3961.36	99.71	127.079	0.00043	127.078
41	3836.62	96.57	65.4273	0.05909	65.3682					41	3962.16	99.73	127.033	0.00065	127.032
42	3922.35	98.72	55.0257	0.07119	54.9545					42	3953.28	99.5	127.082	0.00015	127.082
43	3928.03	98.87	60.0865	0.07189	60.0146					43	3910.1	98.42	127.037	0.07032	126.967
44	3891.2	97.94	32.5757	0.06825	32.5075					44	3950.49	99.43	126.956	0.06904	126.887
45	3955.95	99.57	59.7304	0.07106	59.6593					45	3906.24	98.32	127.029	0.07059	126.958
46	3955.34	99.56	72.1778	0.07387	72.104					46	3971.46	99.96	127.077	0.0003	127.076
47	3947.68	99.36	66.3606	0.06822	66.2923					47	3869.1	97.38	127.091	0.07038	127.021
48	3905.8	98.31	68.7173	0.07186	68.6454					48	3916.14	98.57	127.025	0.07065	126.955
49	3918.98	98.64	71.4558	0.07103	71.3848					49	3954.9	99.54	126.972	0.00079	126.972
50	3934.31	99.03	71.7857	0.0722	71.7135					50	3931.14	98.95	127.041	0.07275	126.968
51	3918.21	98.62	78.0072	0.06952	77.9377					51	3948.37	99.38	124.875	0.07091	124.804
52	3969.91	99.92	73.801	0.05873	73.7422					52	3942.88	99.24	126.992	0.06702	126.925
53	3970.41	99.93	76.2467	0.01614	76.2306					53	3942.06	99.22	127.02	0.07102	126.949
54	3949.23	99.4	78.6789	0.07296	78.6059					54	3925.26	98.8	125.827	0.0716	125.755
55	3944.06	99.27	69.9301	0.06916	69.861					55	3876.8	97.58	127.078	0.07049	127.008
56	3866	97.31	58.4939	0.07266	58.4213					56	3883.28	97.74	127.04	0.07224	126.967
57	3947.49	99.36	73.2911	0.0688	73.2223					57	3850.86	96.93	127.069	0.0699	126.999
58	3846.28	96.81	52.0445	0.07169	51.9728					58	3931.65	98.96	127.1	0.07166	127.028
59	3949.52	99.41	54.0387	0.07102	53.9677					59	3952.96	99.5	127.029	0.00059	127.029
60	3948.2	99.38	76.1585	0.07395	76.0845					60	3908.16	98.37	127.004	0.07073	126.934
61	3958.54	99.64	80.3523	0.06743	80.2849					61	3926.48	98.83	127.05	0.07075	126.979
62	3883.91	97.76	77.4674	0.06825	77.3992					62	3936.82	99.09	126.867	0.06955	126.797
63	3958.27	99.63	73.3405	0.0735	73.267					63	3950.27	99.43	125.531	2e-05	125.531
64	3893.91	98.01	59.2787	0.06869	59.21					64	3928.81	98.89	127.099	0.07029	127.028
65	3945.61	99.31	69.9323	0.06906	69.8632					65	3953.37	99.51	126.997	0.07443	126.923
66	3937.42	99.1	65.6201	0.07227	65.5478					66	3943.03	99.25	127.103	0.0707	127.032
67	3889.26	97.89	71.9533	0.07027	71.883					67	3760.8	94.66	127.076	0.07258	127.004
68	3969.12	99.9	63.5588	0.03698	63.5218					68	3827.68	96.34	127.071	0.06948	127.001
69	3833.94	96.5	70.7838	0.0712	70.7126					69	3946.13	99.32	127.054	0.07073	126.983
70	3833.95	96.5	63.8508	0.06827	63.7825					70	3970.95	99.95	127.063	0.06982	126.993
71	3966.24	99.83	66.0661	0.07306	65.9931					71	3933.34	99	126.77	0.07086	126.699
72	3958.54	99.64	71.6809	0.02776	71.6531					72	3875.3	97.54	127.02	0.07183	126.948
73	3891.35	97.94	76.0264	0.07175	75.9547					73	3924.2	98.77	127.073	0.00019	127.072
74	3954.74	99.54	73.8848	0.07261	73.8122					74	3940.8	99.19	127.08	0.06929	127.011
75	3959.57	99.66	61.9392	0.06781	61.8714					75	3931.95	98.97	127.038	0.00038	127.038
76	3875.64	97.55	68.9777	0.07103	68.9067					76	3932.74	98.99	126.999	0.06801	126.931
77	3962.12	99.73	67.3651	0.07359	67.2915					77	3972.35	99.98	126.698	0.00027	126.698
78	3908.91	98.39	75.7406	0.07139	75.6693					78	3854.44	97.02	127.056	0.07006	126.986
79	3966.38	99.83	73.1553	0.07138	73.084					79	3939.34	99.15	127.019	0.06786	126.951
80	3939.41	99.15	72.0396	0.07094	71.9686					80	3885.54	97.8	127.006	0.07131	126.934
81	3906.32	98.32	76.2735	0.0206	76.2529					81	3917.7	98.61	126.958	0.07167	126.887
82	3877.16	97.59	74.2619	0.07398	74.1879					82	3952.85	99.49	127.079	0.00042	127.079
83	3971.06	99.95	61.5783	0.00324	61.5751					83	3877.04	97.58	127.088	0.07206	127.016
84	3903.21	98.24	64.9397	0.07153	64.8681					84	3625.72	91.26	127.014	0.07243	126.941
85	3912.9	98.49	77.4272	0.07212	77.3551					85	3795.85	95.54	127.1	0.06882	127.031
86	3966.88	99.85	77.9333	0.07734	77.8559					86	3900.64	98.18	127.089	0.00032	127.088
87	3841.18	96.68	67.2134	0.06764	67.1457					87	3908.33	98.37	126.933	0.07132	126.861
88	3879.4	97.64	64.5332	0.0693	64.4639					88	3972.5	99.99	127.011	0.00055	127.01
89	3878.26	97.62	65.0317	0.07282	64.9589					89	3955.34	99.56	127.11	0.07235	127.037
90	3946.82	99.34	75.7445	0.03638	75.7081					90	3891.1	97.94	127.061	0.06642	126.994
91	3971.98	99.97	61.3655	0.0328	61.3327					91	3935.83	99.06	126.944	0.00053	126.943
92	3782.54	95.21	75.8205	0.07259	75.7479					92	3945	99.29	126.986	0.07062	126.915
93	3900.61	98.18	68.7121	0.04093	68.6711					93	3870.88	97.43	127.078	0.00017	127.078
94	3964.74	99.79	78.7048	0.07332	78.6315					94	3940.15	99.17	127.057	0.07302	126.984
95	3900.56	98.18	71.1062	0.07193	71.0343					95	3859.79	97.15	127.024	0.06899	126.955
96	3933.36	99	76.3822	0.07202	76.3102					96	3616.29	91.02	127.095	0.07094	127.024
97	3939.93	99.17	75.9303	0.07274	75.8576					97	3843.1	96.73	127.114	0.06912	127.045
98	3946.2	99.33	77.124	0.07096	77.053					98	3928.86	98.89	127.031	0.07335	126.958
99	3962.66	99.74	65.4921	0.06893	65.4232					99	3951.43	99.46	127.002	0.07067	126.932
100	3966.86	99.85	68.4525	0.01717	68.4353					100	3959.05	99.65	127.039	0.07163	126.967
101	3951.3	99.45	65.5405	0.07316	65.4674					101	3898.79	98.13	127.008	0.06907	126.939
102	3947.58	99.36	58.2136	0.06978	58.1438					102	3925.45	98.8	127.006	0.06931	126.936
103	3944.56	99.28	61.6198	0.0402	61.5796					103	3827.61	96.34	127.073	0.06958	127.003
104	3912.01	98.46	61.058	0.014	61.044					104	3863.86	97.25	126.861	0.07097	126.79
105	3928.03	98.87	77.2305	0.0691	77.1614					105	3862.15	97.21	127.11	1e-05	127.11
106	3913.86	98.51	63.4117	0.06761	63.3441					106	3964.59	99.79	127.051	0.00016	127.05
107	3942.94	99.24	64.7254	0.07261	64.6527					107	3939.66	99.16	126.692	0.07442	126.617
108	3966.88	99.85	52.328	0.0724	52.2556					108	3805.51	95.78	127.09	0.07252	127.017
109	3846.55	96.82	64.1835	0.06867	64.1148					109	3939.16	99.15	127.075	0.07269	127.002
110	3969.91	99.92	62.5888	0.07343	62.5153					110	3962.45	99.73	126.839	0.07338	126.766
111	3920.68	98.68	67.582	0.07303	67.509					111	3840.41	96.66	127.072	0.07013	127.002
112	3935.49	99.06	72.2224	0.07028	72.1521					112	3966.24	99.83	127.052	0.07026	126.982
113	3859.62	97.15	71.7177	0.07193	71.6458					113	3730.03	93.88	127.059	0.07027	126.989
114	3971.46	99.96	70.2583	0.06897	70.1894					114	3948.53	99.38	127.086	0.07149	127.015
115	3926.19	98.82	66.6347	0.07047	66.5642					115	3899.08	98.14	127.087	0.0729	127.014
116	3897.08	98.09	74.8394	0.06761	74.7718					116	3866.46	97.32	126.986	0.07232	126.914
117	3962.98	99.75	33.0324	0.07392	32.9585					117	3959.06	99.65	126.973	0.06944	126.904
118	3968.88	99.9	69.3158	0.07117	69.2446					118	3927.66	98.86	126.997	0.07026	126.927
119	3944.06	99.27	64.2869	0.05797	64.2289					119	3921.83	98.71	127.064	0.06895	126.995
120	3955.55	99.56	67.5352	0.07143	67.4637					120	3931.14	98.95	127.131	0.0716	127.06
121	3823.92	96.25	68.7076	0.071	68.6366					121	3947.58	99.36	127.034	0.06938	126.965
122	3789.29	95.38	79.012	0.06921	78.9428					122	3962.77	99.74	127.064	0.06803	126.996
123	3971.52	99.96	70.6494	0.0637	70.5857					123	3930.62	98.93	127.12	0.07001	127.05
124	3943.7	99.26	60.0533	0.06753	59.9857					124	3829.98	96.4	126.966	0.06774	126.898
125	3945.79	99.31	74.6606	0.07143	74.5892					125	3960.74	99.69	127.079	0.0702	127.009
126	3967.84	99.87	69.4791	0.06604	69.4131					126	3944.06	99.27	127.062	0.00055	127.061
127	3822.51	96.21	66.6993	0.06989	66.6295					127	3915.63	98.56	127.051	0.00032	127.05
128	3971.38	99.96	68.9101	0.05225	68.8579					128	3930.62	98.93	127.105	0.06876	127.037
129	3969.12	99.9	70.642	0.07001	70.572					129	3969.58	99.91	127.008	0.0748	126.933
130	3967.33	99.86	71.5855	0.06942	71.5161					130	3919.25	98.65	126.984	0.06772	126.917
131	3909.94	98.41	55.1862	0.07183	55.1144					131	3751.53	94.43	127.105	0.0709	127.034
132	3890.81	97.93	72.7178	0.06912	72.6487					132	3969.12	99.9	123.631	9e-05	123.631
133	3931.54	98.96	72.0369	0.07375	71.9631					133	3886.83	97.83	127.081	0.0723	127.008
134	3881.49	97.7	59.3897	0.06813	59.3216					134	3920.15	98.67	127.066	0.06864	126.997
135	3869.1	97.38	76.2936	0.0708	76.2228					135	3929.59	98.91	126.973	0.06876	126.905
136	3968.8	99.89	69.1714	0.03375	69.1377					136	3965.26	99.8	126.988	0.07022	126.918
137	3922.26	98.72	72.1848	0.04705	72.1378					137	3706.66	93.3	127.007	0.07235	126.935
138	3973	100	67.323	0.07122	67.2518					138	3911.59	98.45	126.396	0.02436	126.372
139	3919.83	98.66	53.3746	0.06984	53.3047					139	3777.59	95.08	127.081	0.07012	127.011
140	3966.86	99.85	61.5	0.01973	61.4803					140	3955.36	99.56	127.133	0.0705	127.063
141	3874.78	97.53	76.7055	0.06756	76.6379					141	3839.59	96.64	127.093	0.07339	127.019
142	3950.93	99.44	57.2785	0.07088	57.2076					142	3899.98	98.16	126.974	0.0727	126.901
143	3972.35	99.98	74.9404	0.0223	74.9181					143	3923.02	98.74	127.086	0.06971	127.016
144	3955.55	99.56	76.6698	0.01983	76.65					144	3964.74	99.79	127.028	0.00015	127.028
145	3972.67	99.99	59.6378	0.02776	59.61					145	3964.09	99.78	127.004	0.07346	126.93
146	3952.48	99.48	71.0072	0.07169	70.9355					146	3955.95	99.57	126.793	0.00061	126.793
147	3915.91	98.56	73.8604	0.07161	73.7888					147	3838.56	96.62	126.989	0.00016	126.989
148	3924.43	98.78	74.5482	0.07015	74.4781					148	3893.91	98.01	126.894	0.07155	126.822
149	3948.85	99.39	71.286	0.0733	71.2127					149	3967.02	99.85	126.97	0.06642	126.904
150	3970.43	99.94	65.3299	0.06763	65.2623					150	3927.89	98.86	127.094	0.07098	127.023
151	3939.71	99.16	69.6239	0.03897	69.585					151	3767.45	94.83	127.049	0.07216	126.977
152	3971.46	99.96	62.8038	0.0765	62.7273					152	3928.72	98.89	127.087	1e-05	127.087
153	3831.13	96.43	71.9706	0.00082	71.9697					153	3971.46	99.96	126.917	0.00074	126.916
154	3934.76	99.04	61.3338	0.07176	61.262					154	3950.34	99.43	127.083	0.06895	127.014
155	3962.15	99.73	77.2335	0.07457	77.1589					155	3834.38	96.51	126.949	0.07351	126.875
156	3956.19	99.58	70.7166	0.02189	70.6947					156	3727.07	93.81	127.061	0.06804	126.993
157	3965.26	99.8	68.5405	0.07044	68.4701					157	3871.17	97.44	127.073	0.06597	127.007
158	3964.92	99.8	73.1	0.00082	73.0991					158	3957.92	99.62	127.083	0.07336	127.01
159	3803.44	95.73	74.6143	0.07249	74.5418					159	3921.06	98.69	126.972	0.07068	126.901
160	3830.84	96.42	56.3731	0.06968	56.3035					160	3947.16	99.35	127.083	0.06933	127.014
161	3902.51	98.23	76.0367	0.07017	75.9666					161	3811.04	95.92	127.092	0.07241	127.019
162	3846.35	96.81	78.1524	0.07036	78.0821					162	3955.55	99.56	126.921	0.00057	126.92
163	3925.45	98.8	66.5633	0.03842	66.5249					163	3961.12	99.7	126.975	0.00114	126.974
164	3967.18	99.85	71.9873	0.03581	71.9515					164	3879.95	97.66	127.133	0.06867	127.064
165	3937.77	99.11	51.686	0.07043	51.6156					165	3966.88	99.85	127.045	0.07392	126.971
166	3911.92	98.46	75.8888	0.04159	75.8472					166	3918.21	98.62	126.997	0.07091	126.926
167	3941.6	99.21	72.1575	0.07185	72.0856					167	3966.35	99.83	127.091	0.07102	127.02
168	3868.09	97.36	61.5656	0.07155	61.4941					168	3908.8	98.38	127.093	0.06983	127.024
169	3952.85	99.49	49.4964	0.06963	49.4268					169	3948.2	99.38	126.679	0.07377	126.606
170	3946.26	99.33	73.964	0.07168	73.8923					170	3938.21	99.12	127.057	0.07107	126.986
171	3921.31	98.7	63.381	0.0691	63.3119					171	3797.28	95.58	127.052	0.07351	126.978
172	3930.62	98.93	58.5922	0.04156	58.5507					172	3971.85	99.97	127.024	0.07412	126.95
173	3944.58	99.28	68.2261	0.0697	68.1564					173	3929.69	98.91	127.062	0.00075	127.062
174	3941.65	99.21	68.9755	0.02729	68.9482					174	3971.46	99.96	127.061	0.0708	126.991
175	3794.5	95.51	75.2448	0.07458	75.1703					175	3928.03	98.87	127.104	0.07148	127.033
176	3968.15	99.88	67.9939	0.07237	67.9215					176	3940.44	99.18	127.008	0.0722	126.935
177	3968.36	99.88	60.4117	0.07271	60.3389					177	3900.96	98.19	127.081	0.06967	127.011
178	3911.99	98.46	63.879	0.07365	63.8053					178	3846.35	96.81	127.081	0.06979	127.011
179	3905.45	98.3	70.9326	0.07245	70.8602					179	3884.86	97.78	126.801	0.07074	126.73
180	3970.09	99.93	62.0411	0.01454	62.0266					180	3961.07	99.7	127.089	0.07478	127.014
181	3920.59	98.68	76.4164	0.07058	76.3458					181	3865.48	97.29	127.01	0.0741	126.936
182	3949.75	99.41	71.1318	0.07452	71.0573					182	3954.51	99.53	126.913	0.06778	126.845
183	3953.61	99.51	59.7123	0.05785	59.6544					183	3939.83	99.16	127.065	0.07222	126.992
184	3923.71	98.76	69.1773	0.07179	69.1055					184	3937.34	99.1	126.96	0.06789	126.892
185	3915.24	98.55	71.8451	0.07211	71.7729					185	3926.49	98.83	127.073	0.07149	127.001
186	3953.61	99.51	64.5136	0.07259	64.441					186	3905.55	98.3	127.046	0.07158	126.975
187	3904.9	98.29	72.2513	0.06895	72.1824					187	3970.43	99.94	126.928	0.07173	126.856
188	3914.21	98.52	35.0063	0.07139	34.9349					188	3916.66	98.58	127.065	0.06542	127
189	3846.58	96.82	73.4608	0.07096	73.3899					189	3914.08	98.52	127.072	0.07131	127
190	3970.73	99.94	74.9526	0.07222	74.8804					190	3915.63	98.56	126.988	0.07755	126.91
191	3945.61	99.31	63.3925	0.07466	63.3178					191	3966.53	99.84	126.7	0.00252	126.697
192	3885.58	97.8	73.137	0.07174	73.0652					192	3965.78	99.82	127.029	0.00033	127.029
193	3838.6	96.62	66.8289	0.07077	66.7581					193	3967.2	99.85	127.008	0.07495	126.933
194	3923.9	98.76	75.8315	0.06773	75.7638					194	3786.24	95.3	127.081	0.07222	127.009
195	3867.47	97.34	56.9271	0.07034	56.8567					195	3971.98	99.97	127.022	0.00113	127.021
196	3781.73	95.19	79.3484	0.06781	79.2806					196	3927.73	98.86	127.003	0.06946	126.934
197	3800.24	95.65	75.0791	0.07174	75.0074					197	3967.33	99.86	127.038	0.00014	127.038
198	3920.11	98.67	65.732	0.07231	65.6597					198	3888.99	97.89	127.047	0.07347	126.973
199	3915.86	98.56	74.644	0.06586	74.5781					199	3970.73	99.94	127.058	0.00017	127.058
200	3902.7	98.23	73.815	0.07049	73.7445					200	3797.24	95.58	127.112	0.06891	127.043

## Sheet: 06_RBACO_Seeds(200)
Fast Converegnce Exp							Fast Converegnce Exp			Slow Converegnce Exp							Slow Converegnce Exp
#	CBLF	Quality	Taumax	Taumin	DeltaTauminmax		Global Optimal Solution =	3973.01		#	CBLF	Quality	Taumax	Taumin	DeltaTauminmax		Global Optimal Solution =	3973
1	3948.72	99.39	71.3788	0.07017	71.3086		Minimum Optimal Solution =	3694.35		1	3948.72	99.39	127.059	0.07017	126.989		Minimum Optimal Solution =	3476.87
2	3965.26	99.8	62.2384	0.07312	62.1653		Mean of Optimal Solution =	3919.69		2	3942.94	99.24	127.061	0.00042	127.061		Mean of Optimal Solution =	3908.65
3	3951.81	99.47	55.4604	0.06815	55.3923		Median of Optimal Solution =	3919.69		3	3871.17	97.44	127.112	0.07044	127.042		Median of Optimal Solution =	3908.65
4	3964.27	99.78	76.1418	0.06849	76.0733		Solution Standrad Deviation =	56.5636		4	3937.24	99.1	127.079	0.07576	127.003		Solution Standrad Deviation =	65.7809
5	3852.55	96.97	75.8615	0.07244	75.7891		Average Price =	16.105		5	3940.96	99.19	126.88	0.06927	126.81		Average Price =	61.62
6	3871.76	97.45	76.5147	0.07228	76.4424		Relability =	10.5		6	3819.33	96.13	127.086	0.07107	127.015		Relability =	8
7	3872.2	97.46	56.1388	0.06791	56.0709		Normalized Price =	153.381		7	3811.29	95.93	127.075	0.07117	127.003		Normalized Price =	770.25
8	3971.98	99.97	57.1993	0.00861	57.1907		Average Solution Quality =	98.658		8	3972.5	99.99	126.989	0.0043	126.985		Average Solution Quality =	98.3801
9	3968.36	99.88	65.1817	0.05278	65.1289		Average FDC =	-90.0715		9	3940.96	99.19	127.005	0.07212	126.933		Average FDC =	-26.6696
10	3889.78	97.91	56.7183	0.07181	56.6465		Correlation Coefficent =	-0.83206		10	3719.17	93.61	126.678	0.06871	126.609		Correlation Coefficent =	-1
11	3964.74	99.79	63.4688	0.07035	63.3984		Solution Robustness =	69.2971		11	3960.72	99.69	126.888	0.00185	126.886		Solution Robustness =	59.4193
12	3845.76	96.8	50.1783	0.0671	50.1112		Performance Rate =	0.0065197		12	3914.84	98.54	127.029	0.07099	126.958		Performance Rate =	0.0012983
13	3877.61	97.6	78.956	0.0721	78.8839		Average Elapsed Time =	0.82998		13	3940.15	99.17	127.06	0.07055	126.989		Average Elapsed Time =	2.8724
14	3963.44	99.76	73.9993	0.06984	73.9295					14	3939.94	99.17	126.9	0.0711	126.829
15	3943.59	99.26	71.2375	0.06024	71.1773					15	3861.83	97.2	127.118	0.00017	127.118
16	3852.04	96.96	68.2157	0.06963	68.1461					16	3875.65	97.55	127.079	0.07092	127.008
17	3821.02	96.17	72.7487	0.06869	72.68					17	3830.84	96.42	127.059	0.07125	126.987
18	3900.95	98.19	71.5529	0.07009	71.4828					18	3946.32	99.33	127	0.07507	126.925
19	3919.67	98.66	79.8651	0.07084	79.7943					19	3927.55	98.86	127.089	0.07354	127.015
20	3951.82	99.47	65.645	0.0689	65.5761					20	3912.93	98.49	127.107	0.07331	127.033
21	3900.56	98.18	66.9644	0.07107	66.8933					21	3800.34	95.65	127.101	0.07121	127.03
22	3934.01	99.02	77.0226	0.07441	76.9482					22	3855.66	97.05	127.034	0.06963	126.965
23	3961.64	99.71	64.9496	0.03266	64.917					23	3832.68	96.47	127.11	0.07012	127.04
24	3904.81	98.28	58.7541	0.06489	58.6892					24	3921.76	98.71	127.067	0.07069	126.996
25	3888.74	97.88	80.5085	0.07155	80.4369					25	3919.25	98.65	126.938	0.06973	126.868
26	3955.95	99.57	58.3906	0.05072	58.3398					26	3937.77	99.11	127.069	0.00032	127.068
27	3753.09	94.46	76.6585	0.0717	76.5868					27	3960.19	99.68	127.007	0.0729	126.934
28	3829.3	96.38	58.2603	0.07083	58.1895					28	3807.98	95.85	127.093	0.06842	127.024
29	3921.83	98.71	65.9834	0.07101	65.9124					29	3937.27	99.1	127.059	0.07189	126.987
30	3774.49	95	27.2649	0.06929	27.1956					30	3844.46	96.76	127.091	0.07256	127.019
31	3942.51	99.23	62.3938	0.06922	62.3246					31	3964.74	99.79	127.021	0.02093	127
32	3915.61	98.56	70.3361	0.07263	70.2635					32	3955.22	99.55	127.045	0.00041	127.045
33	3943.55	99.26	68.9228	0.0176	68.9052					33	3873.94	97.51	127.095	0.06836	127.027
34	3964.74	99.79	63.1222	0.07533	63.0469					34	3963.19	99.75	127.085	0.00203	127.083
35	3935.45	99.05	59.0838	0.06714	59.0166					35	3961.12	99.7	127.059	0.07444	126.984
36	3920.8	98.69	66.9269	0.07551	66.8514					36	3970.43	99.94	126.963	0.07073	126.892
37	3971.38	99.96	70.8542	0.03526	70.8189					37	3967.84	99.87	127.034	0.0696	126.965
38	3905.08	98.29	65.5691	0.07183	65.4973					38	3967.18	99.85	126.554	0.00188	126.553
39	3962.82	99.74	75.1003	0.07392	75.0264					39	3937.12	99.1	127.016	0.00143	127.014
40	3940.8	99.19	68.0393	0.06997	67.9693					40	3875.2	97.54	126.778	0.06595	126.712
41	3844.33	96.76	72.3263	0.06889	72.2574					41	3921.7	98.71	127.037	0.06909	126.968
42	3968.36	99.88	70.4891	0.0424	70.4467					42	3957.81	99.62	126.958	0.00012	126.958
43	3969.76	99.92	63.3137	0.07187	63.2419					43	3959.05	99.65	126.854	0.07111	126.783
44	3921.83	98.71	71.8684	0.05933	71.809					44	3912.89	98.49	126.925	0.00029	126.925
45	3907.09	98.34	76.2306	0.07032	76.1603					45	3970.41	99.93	127.017	0.00042	127.016
46	3934.51	99.03	57.9009	0.07218	57.8287					46	3956.13	99.58	127.011	0.07209	126.939
47	3934.17	99.02	18.9832	0.07078	18.9124					47	3946.65	99.34	127.003	0.07224	126.93
48	3814.56	96.01	73.0233	0.0688	72.9545					48	3918.73	98.63	127.071	0.0713	127
49	3972.17	99.98	70.189	0.07205	70.117					49	3964.74	99.79	126.948	0.07119	126.877
50	3958.07	99.62	73.46	0.06578	73.3942					50	3869.72	97.4	127.059	0.07152	126.988
51	3945.64	99.31	62.5137	0.07252	62.4412					51	3940.03	99.17	126.957	0.00046	126.956
52	3739.85	94.13	77.5513	0.07299	77.4783					52	3949.73	99.41	126.88	0.00026	126.88
53	3955.02	99.55	74.6161	0.06956	74.5465					53	3970.41	99.93	126.809	0.00039	126.808
54	3950.84	99.44	71.5956	0.07426	71.5214					54	3908.91	98.39	127.063	0.07255	126.991
55	3930.34	98.93	60.7998	0.03233	60.7674					55	3930.78	98.94	127.058	0.07352	126.985
56	3955.55	99.56	72.7062	0.03291	72.6733					56	3970.09	99.93	126.975	0	126.975
57	3871.68	97.45	76.4984	0.0744	76.424					57	3956.51	99.58	127.054	0.00016	127.054
58	3925.45	98.8	76.1288	0.0692	76.0596					58	3792.37	95.45	127.072	0.06945	127.003
59	3904.43	98.27	71.2856	0.06744	71.2181					59	3972.67	99.99	126.991	0.00055	126.99
60	3941.92	99.22	67.8054	0.07074	67.7347					60	3933.2	99	126.994	0.07164	126.923
61	3828.77	96.37	71.4859	0.0733	71.4126					61	3971.46	99.96	126.913	0.07333	126.839
62	3953.19	99.5	70.5461	0.0704	70.4757					62	3926.99	98.84	126.914	0.07203	126.842
63	3944.7	99.29	66.8563	0.07357	66.7827					63	3969.91	99.92	126.932	0.06889	126.863
64	3942.76	99.24	79.9399	0.07058	79.8693					64	3943.26	99.25	126.883	0.00455	126.878
65	3925.76	98.81	49.2343	0.07076	49.1635					65	3953.89	99.52	126.951	0.00212	126.949
66	3867.26	97.34	69.6313	0.07165	69.5597					66	3930.1	98.92	127.088	0.06919	127.019
67	3964.94	99.8	61.5481	0.06853	61.4796					67	3839.79	96.65	127.082	0.06974	127.013
68	3927.55	98.86	75.1577	0.07354	75.0842					68	3926.15	98.82	126.914	0.07104	126.843
69	3872.72	97.48	77.6078	0.0718	77.536					69	3836.88	96.57	127.065	0.07047	126.995
70	3920	98.67	66.6874	0.02677	66.6606					70	3836.45	96.56	127.097	0.06939	127.028
71	3962.77	99.74	74.1989	0.06811	74.1308					71	3933.2	99	127.109	0.07005	127.039
72	3941.86	99.22	69.3636	0.06855	69.2951					72	3901.2	98.19	126.946	0.07234	126.873
73	3959.1	99.65	80.1799	0.01622	80.1636					73	3833.94	96.5	127.103	0.06999	127.033
74	3961.36	99.71	67.4859	0.02425	67.4617					74	3941.21	99.2	126.974	0.06913	126.905
75	3800.34	95.65	76.724	0.07121	76.6528					75	3893.4	98	126.986	0.06803	126.918
76	3905.47	98.3	60.0076	0.07001	59.9375					76	3924.54	98.78	127.066	0.07142	126.994
77	3890.03	97.91	74.3426	0.07288	74.2697					77	3917.7	98.61	126.961	0.07005	126.891
78	3888.74	97.88	61.5568	0.07174	61.485					78	3879.14	97.64	127.064	0.06699	126.997
79	3855.66	97.05	68.2228	0.06963	68.1532					79	3952.85	99.49	127.063	0.0759	126.987
80	3799.67	95.64	72.8893	0.07243	72.8169					80	3805.01	95.77	127.09	0.0725	127.017
81	3966.86	99.85	72.9154	0.06885	72.8466					81	3968.47	99.89	127.057	0.00018	127.056
82	3961.5	99.71	79.5223	0.07448	79.4479					82	3954.4	99.53	127.066	0.00031	127.066
83	3918.73	98.63	61.7748	0.0503	61.7245					83	3954.39	99.53	127.031	0.07285	126.958
84	3921.83	98.71	77.5949	0.07276	77.5222					84	3940.03	99.17	127.026	0.00014	127.025
85	3940.96	99.19	70.2344	0.07031	70.1641					85	3900.93	98.19	127.076	0.00031	127.076
86	3904.83	98.28	77.5895	0.06834	77.5211					86	3822.57	96.21	127.082	0.07079	127.011
87	3964.59	99.79	53.065	0.07249	52.9926					87	3855.53	97.04	127.064	0.07152	126.993
88	3897.99	98.11	56.6409	0.07039	56.5705					88	3972.03	99.98	126.683	0.03241	126.65
89	3900.93	98.19	78.477	0.02354	78.4535					89	3934.17	99.02	126.914	0.07074	126.844
90	3972.67	99.99	67.2117	0.04626	67.1654					90	3953.37	99.51	127.138	0.07479	127.063
91	3865.81	97.3	67.0057	0.07427	66.9314					91	3936.82	99.09	127.046	0.06934	126.977
92	3969.39	99.91	74.7435	0.0569	74.6866					92	3924.82	98.79	127.039	0.07126	126.968
93	3877.37	97.59	39.045	0.07004	38.975					93	3966.05	99.82	126.916	0.07331	126.843
94	3937.77	99.11	72.5725	0.04125	72.5312					94	3973	100	127.014	0.0004	127.014
95	3937.45	99.1	64.9006	0.05808	64.8425					95	3916.14	98.57	125.293	0.07008	125.223
96	3831.81	96.45	79.2327	0.06884	79.1639					96	3936.27	99.08	127.026	0.07402	126.952
97	3973.01	100	72.019	0.00113	72.0179					97	3893.91	98.01	127.007	0.07101	126.936
98	3971.98	99.97	58.4299	0.07387	58.3561					98	3843.34	96.74	127.102	0.07296	127.029
99	3945.61	99.31	62.1667	0.07063	62.0961					99	3940.45	99.18	125.005	0.07237	124.932
100	3933.72	99.01	76.0469	0.07054	75.9764					100	3925.97	98.82	126.741	0.06955	126.671
101	3705.1	93.26	74.7831	0.07014	74.713					101	3953.72	99.51	127.011	0.07206	126.939
102	3879.95	97.66	75.3153	0.0736	75.2417					102	3909.35	98.4	127.057	0.07187	126.985
103	3964.59	99.79	59.1572	0.03577	59.1214					103	3875.3	97.54	127.124	0.06942	127.055
104	3919.25	98.65	68.2231	0.06594	68.1572					104	3833.94	96.5	127.021	0.06911	126.951
105	3873.75	97.5	79.5323	0.07617	79.4561					105	3927.43	98.85	127.043	0.00046	127.043
106	3963.19	99.75	63.6436	0.07257	63.571					106	3933.57	99.01	127.067	0.00014	127.067
107	3947.91	99.37	52.9215	0.06759	52.8539					107	3955.44	99.56	127.042	0.07226	126.97
108	3964.59	99.79	62.4494	0.07013	62.3793					108	3973	100	127.046	0.00097	127.045
109	3759.49	94.63	68.5389	0.06712	68.4718					109	3968.88	99.9	126.939	0.07212	126.867
110	3874.78	97.53	72.6644	0.07167	72.5927					110	3944.67	99.29	127.058	0.06873	126.989
111	3951.14	99.45	67.8973	0.07249	67.8248					111	3827.18	96.33	126.969	0.06694	126.902
112	3954.93	99.54	71.8004	0.07297	71.7275					112	3831.99	96.45	127.083	0.06913	127.014
113	3855.66	97.05	63.2561	0.07045	63.1856					113	3915.11	98.54	126.907	0.07087	126.837
114	3944.82	99.29	62.0768	0.07071	62.0061					114	3885.47	97.8	127.091	0.06929	127.022
115	3955.95	99.57	73.8128	0.07085	73.7419					115	3960.88	99.69	126.957	0.06938	126.887
116	3962.66	99.74	70.2579	0.06969	70.1883					116	3967.5	99.86	124.113	0.06972	124.043
117	3921.55	98.7	79.7159	0.07213	79.6437					117	3871.01	97.43	127.082	0.07155	127.01
118	3970.41	99.93	67.0585	0.073	66.9855					118	3952.87	99.49	126.455	0.07414	126.381
119	3887.16	97.84	73.5389	0.0701	73.4688					119	3910.97	98.44	126.98	0.06909	126.91
120	3889.57	97.9	78.4562	0.07316	78.383					120	3886.16	97.81	127.118	0.07079	127.047
121	3930.8	98.94	69.2108	0.07056	69.1403					121	3968.88	99.9	127.09	0.00091	127.089
122	3951.02	99.45	61.3776	0.07362	61.3039					122	3939.41	99.15	127.043	0.07183	126.971
123	3875.47	97.54	75.964	0.06921	75.8948					123	3889.78	97.91	127.073	0.07083	127.002
124	3861.34	97.19	67.3962	0.06897	67.3272					124	3965.26	99.8	127.062	0.00115	127.061
125	3920.35	98.67	77.8506	0.07378	77.7768					125	3883.57	97.75	127.094	0.07244	127.022
126	3967.32	99.86	69.0613	0.07323	68.9881					126	3890.91	97.93	127.079	0.00033	127.078
127	3970.73	99.94	57.1767	0.01596	57.1607					127	3843.49	96.74	127.114	0.07052	127.044
128	3963.19	99.75	34.4563	0.06432	34.392					128	3921.83	98.71	124.75	0.0752	124.675
129	3966.86	99.85	76.0871	0.03884	76.0483					129	3851.57	96.94	127.016	0.06693	126.949
130	3908.39	98.37	75.1646	0.07409	75.0905					130	3793.62	95.48	127.145	0.07472	127.071
131	3869.33	97.39	76.5226	0.06939	76.4532					131	3910.1	98.42	127.064	0.07154	126.993
132	3947.91	99.37	74.3277	0.07551	74.2522					132	3964.12	99.78	126.981	0.07464	126.906
133	3966.88	99.85	70.7675	0.06812	70.6994					133	3953.7	99.51	127.022	0.07308	126.948
134	3954.74	99.54	63.3091	0.0752	63.2339					134	3907.43	98.35	126.99	0.06226	126.927
135	3960.72	99.69	64.802	0.07282	64.7292					135	3912.53	98.48	127.047	0.07509	126.972
136	3968.47	99.89	61.8617	0.05865	61.803					136	3923.82	98.76	127.065	0.07198	126.993
137	3972.03	99.98	55.4254	0.0657	55.3597					137	3773.45	94.98	127.042	0.06844	126.974
138	3923.39	98.75	75.7633	0.06944	75.6938					138	3950.79	99.44	125.54	0.06985	125.47
139	3903.95	98.26	74.1432	0.07043	74.0727					139	3969.12	99.9	127.05	0.00034	127.05
140	3961.04	99.7	75.8334	0.04022	75.7932					140	3893.46	98	127.099	0.07006	127.029
141	3970.95	99.95	51.2898	0.02851	51.2613					141	3865.48	97.29	127.063	0.07016	126.993
142	3965.24	99.8	69.733	0.0456	69.6874					142	3970.09	99.93	126.966	0.00011	126.966
143	3858.76	97.12	51.2606	0.07037	51.1903					143	3939.18	99.15	127.036	0.0707	126.966
144	3961.12	99.7	74.0635	0.06911	73.9944					144	3832.39	96.46	127.027	0.06768	126.959
145	3969.26	99.91	60.6295	0.07101	60.5585					145	3908.91	98.39	127.096	0.07482	127.021
146	3944	99.27	54.9802	0.07025	54.9099					146	3959.68	99.66	127.067	0.06976	126.997
147	3892.31	97.97	64.2223	0.07053	64.1518					147	3964.59	99.79	127.041	0.00031	127.04
148	3895.59	98.05	77.7445	0.0723	77.6722					148	3938.63	99.13	127.009	0.07192	126.937
149	3966.21	99.83	65.7634	0.01112	65.7523					149	3771.01	94.92	127.11	0.07353	127.036
150	3966.88	99.85	71.0498	0.07367	70.9762					150	3919.04	98.64	126.965	0.07301	126.892
151	3934.76	99.04	68.4317	0.06599	68.3657					151	3902.19	98.22	127.107	0.07236	127.035
152	3936.16	99.07	51.6942	0.07178	51.6225					152	3972.03	99.98	127.094	0.0003	127.093
153	3961.12	99.7	64.752	0.07143	64.6806					153	3943.55	99.26	127.004	0.07622	126.927
154	3970.95	99.95	67.9657	0.0737	67.892					154	3932.28	98.97	127.076	0.00032	127.076
155	3941.33	99.2	63.4387	0.0431	63.3956					155	3892.8	97.98	127.092	0.07516	127.017
156	3972.67	99.99	61.0884	0.07299	61.0154					156	3704.56	93.24	127.114	0.07064	127.044
157	3917.53	98.6	58.5053	0.06766	58.4376					157	3903.53	98.25	127.06	0.07015	126.99
158	3970.41	99.93	68.0852	0.04495	68.0402					158	3963.95	99.77	126.835	0.00121	126.834
159	3865.22	97.29	71.4534	0.07141	71.382					159	3964.41	99.78	126.844	0.06712	126.777
160	3701.08	93.16	77.0913	0.07091	77.0204					160	3939.41	99.15	127.094	0.07418	127.02
161	3954.92	99.54	74.577	0.04141	74.5356					161	3917.23	98.6	127.119	0.07421	127.044
162	3887.41	97.85	75.983	0.07288	75.9101					162	3878.45	97.62	127.112	0.07243	127.04
163	3967.18	99.85	62.4584	0.07366	62.3847					163	3945.61	99.31	126.95	0.07282	126.877
164	3899.26	98.14	67.8714	0.0726	67.7988					164	3937.59	99.11	127.002	0.07071	126.931
165	3717.35	93.56	63.01	0.0036	63.0064					165	3476.87	87.51	127.083	0.07096	127.012
166	3876.49	97.57	67.7073	0.07148	67.6359					166	3960.09	99.67	126.607	0.00041	126.607
167	3940.44	99.18	74.2479	0.06943	74.1784					167	3966.24	99.83	127.004	0.07349	126.93
168	3957.6	99.61	51.0578	0.07224	50.9856					168	3919.82	98.66	127.074	0.0697	127.004
169	3972.67	99.99	74.0144	0.01616	73.9983					169	3910.46	98.43	126.373	0.06904	126.304
170	3962.5	99.74	67.4699	0.07146	67.3985					170	3920.64	98.68	126.591	0.00024	126.591
171	3694.36	92.99	77.3557	0.06752	77.2882					171	3844.28	96.76	127.06	0.07297	126.987
172	3972.35	99.98	41.2326	0.0706	41.162					172	3888.65	97.88	127.075	0.00029	127.075
173	3950.14	99.42	69.5832	0.07278	69.5105					173	3818.95	96.12	126.986	0.0726	126.913
174	3890.88	97.93	72.1259	0.06948	72.0564					174	3891.33	97.94	127.067	0.07392	126.993
175	3967.2	99.85	66.3693	0.07334	66.296					175	3893.4	98	127.028	0.06626	126.962
176	3972.17	99.98	67.9897	0.06721	67.9225					176	3972.35	99.98	127.066	0.00053	127.066
177	3970.73	99.94	65.7142	0.07456	65.6396					177	3927.52	98.85	127.128	0.06696	127.061
178	3968.36	99.88	70.9565	0.02245	70.9341					178	3847.9	96.85	126.685	0.07362	126.612
179	3844.5	96.77	69.8076	0.07204	69.7356					179	3908.55	98.38	127.012	0.07044	126.942
180	3943.26	99.25	29.4118	0.06963	29.3421					180	3956.84	99.59	126.647	0.01036	126.636
181	3936.04	99.07	48.5281	0.06938	48.4587					181	3939.41	99.15	126.986	0.07263	126.913
182	3967.18	99.85	72.6491	0.07243	72.5767					182	3922.49	98.73	127.101	0.07015	127.031
183	3906.04	98.31	69.8265	0.07008	69.7565					183	3921.95	98.71	127.031	0.06929	126.961
184	3970.41	99.93	72.3829	0.05031	72.3326					184	3926.88	98.84	127.009	0.07199	126.937
185	3966.03	99.82	66.4872	0.07286	66.4143					185	3943.03	99.25	127.018	0.07007	126.948
186	3964.74	99.79	62.3571	0.06769	62.2894					186	3962.66	99.74	126.985	0.00038	126.985
187	3910.3	98.42	76.3398	0.00074	76.3391					187	3875.3	97.54	127.06	0.07109	126.989
188	3948.9	99.39	59.9899	0.07129	59.9186					188	3922.67	98.73	127.081	0.07336	127.008
189	3951.34	99.45	71.1579	0.03374	71.1242					189	3801.62	95.69	127.109	0.07277	127.036
190	3865.07	97.28	66.0903	0.07106	66.0192					190	3955.44	99.56	126.807	0.0003	126.807
191	3920.41	98.68	64.7929	0.06947	64.7234					191	3924.42	98.78	126.895	0.00068	126.894
192	3956.51	99.58	68.0339	0.07155	67.9623					192	3946.65	99.34	127.096	0.07308	127.023
193	3957.19	99.6	65.3079	0.07148	65.2364					193	3633.78	91.46	127.014	0.06903	126.945
194	3851.4	96.94	55.4903	0.0718	55.4185					194	3732.09	93.94	126.956	0.07341	126.883
195	3943.03	99.25	61.5117	0.07427	61.4374					195	3753.62	94.48	127.052	0.06831	126.983
196	3924.42	98.78	68.0524	0.07024	67.9822					196	3884.71	97.78	127.107	0.07212	127.035
197	3951.99	99.47	68.229	0.04716	68.1818					197	3928.14	98.87	127.044	0.07405	126.97
198	3881.98	97.71	66.5354	0.07064	66.4648					198	3972.35	99.98	126.966	0.0044	126.962
199	3900.1	98.16	65.182	0.07144	65.1105					199	3862.38	97.22	127.056	0.06911	126.987
200	3926.47	98.83	70.9817	0.06731	70.9144					200	3958.54	99.64	126.925	0.06669	126.858

## Sheet: 07_RBACO_Seeds(167)
Fast Converegnce Exp							Fast Converegnce Exp			Slow Converegnce Exp							Slow Converegnce Exp
1	3937.34	99.1	3.13838	0.01962	3.11876		Global Optimal Solution =	3973		#	CBLF	Quality	Taumax	Taumin	DeltaTauminmax		Global Optimal Solution =	3973
1	3966.53	99.84	45.4203	0.05118	45.3691		Minimum Optimal Solution =	3692.27		1	3966.53	99.84	126.847	0.0004	126.846		Minimum Optimal Solution =	3606.98
2	3947.88	99.37	49.691	0.07136	49.6197		Mean of Optimal Solution =	3911.03		2	3848.03	96.85	127.076	0.07293	127.003		Mean of Optimal Solution =	3906.78
3	3942.3	99.23	70.7828	0.01314	70.7696		Median of Optimal Solution=	3911.03		3	3876.85	97.58	127.031	0.07169	126.96		Median of Optimal Solution =	3906.78
4	3808.18	95.85	62.8157	0.00421	62.8115		Solution Standrad Deviation =	60.4554		4	3972.67	99.99	127.012	0.00053	127.011		Solution Standrad Deviation =	65.622
5	3931.54	98.96	69.5558	0.07039	69.4854		Average Price =	15.07		5	3971.06	99.95	126.959	0.00035	126.959		Average Price =	62.135
6	3922.56	98.73	67.0997	0.07472	67.025		Relability =	9.5		6	3971.98	99.97	127.05	0.0003	127.05		Relability =	7
7	3889.21	97.89	74.014	0.06595	73.9481		Normalized Price =	158.632		7	3922.35	98.72	127.055	0.07102	126.984		Normalized Price =	887.643
8	3876.85	97.58	67.8513	0.07169	67.7796		Average Solution Quality =	98.44		8	3955.44	99.56	127.115	0.07414	127.041		Average Solution Quality =	98.3329
9	3958.07	99.62	72.9215	0.06663	72.8548		Average FDC =	-72.3944		9	3931.24	98.95	127.058	0.07039	126.988		Average FDC =	-27.802
10	3809.24	95.88	75.0128	0.07049	74.9423		Correlation Coefficent =	-1		10	3945.61	99.31	126.932	0.00013	126.932		Correlation Coefficent =	-1
11	3965.78	99.82	79.3434	0.07191	79.2715		Solution Robustness =	64.6928		11	3881.01	97.68	126.858	0.07099	126.787		Solution Robustness =	59.5346
12	3956.95	99.6	58.5635	0.06748	58.4961		Performance Rate =	0.0063039		12	3642.4	91.68	127.104	0.00018	127.104		Performance Rate =	0.0011266
13	3946.65	99.34	76.6741	0.07118	76.6029		Average Elapsed Time =	0.77646		13	3924.2	98.77	127.019	0.00102	127.018		Average Elapsed Time =	2.8924
14	3888.74	97.88	69.4153	0.07249	69.3428					14	3651.44	91.91	127.069	0.06685	127.002
15	3818.04	96.1	73.1353	0.07542	73.0599					15	3947.82	99.37	126.974	0.07309	126.901
16	3879.84	97.65	62.6539	0.07237	62.5815					16	3939.41	99.15	126.95	0.06934	126.881
17	3875.2	97.54	43.1599	0.06859	43.0913					17	3866	97.31	127.007	0.07515	126.932
18	3946.13	99.32	52.0793	0.0722	52.007					18	3784.31	95.25	126.901	0.07332	126.827
19	3941.99	99.22	53.6515	0.06914	53.5824					19	3886.51	97.82	126.846	0.07193	126.774
20	3944.56	99.28	67.8689	0.07331	67.7956					20	3913.68	98.51	126.612	0.07309	126.539
21	3826.39	96.31	64.7089	0.07206	64.6369					21	3942.11	99.22	127.018	0.07042	126.947
22	3968.36	99.88	74.2647	0.07569	74.189					22	3915.68	98.56	126.865	0.07131	126.793
23	3972.03	99.98	66.5779	0.03996	66.538					23	3873.24	97.49	127.066	0.07318	126.993
24	3807.86	95.84	77.1364	0.07224	77.0642					24	3952.96	99.5	126.95	0.00033	126.949
25	3849.01	96.88	56.1143	0.07292	56.0414					25	3882.09	97.71	127.049	0.06789	126.981
26	3954.69	99.54	66.888	0.07288	66.8151					26	3842.99	96.73	124.068	0.07034	123.998
27	3845.11	96.78	49.1306	0.06872	49.0619					27	3947.16	99.35	127.111	0.0704	127.04
28	3973	100	72.5142	0.01934	72.4948					28	3968.88	99.9	127	0.00033	127
29	3868.76	97.38	62.7168	0.0713	62.6455					29	3962.16	99.73	127.079	0.00274	127.076
30	3802.11	95.7	72.0396	0.07115	71.9685					30	3909.43	98.4	127.041	0.07039	126.971
31	3970.95	99.95	71.3007	0.01865	71.282					31	3925.43	98.8	127.03	0.06811	126.962
32	3972.17	99.98	71.6966	0.07307	71.6236					32	3940.44	99.18	127.041	0.07426	126.967
33	3867.67	97.35	71.0054	0.07228	70.9331					33	3928.03	98.87	126.817	0.07053	126.747
34	3934.95	99.04	60.4869	0.06954	60.4174					34	3856.69	97.07	126.96	0.06729	126.893
35	3960.33	99.68	70.055	0.07424	69.9807					35	3960.74	99.69	127.024	0.07064	126.953
36	3908.45	98.38	76.0931	0.07126	76.0218					36	3959.77	99.67	126.961	0.06981	126.891
37	3959.1	99.65	73.959	0.03763	73.9214					37	3969.58	99.91	127.058	0.07088	126.987
38	3962.45	99.73	64.3571	0.07138	64.2857					38	3973	100	127.002	0.0006	127.001
39	3893.14	97.99	79.5007	0.07119	79.4295					39	3949.87	99.42	126.991	0.07245	126.919
40	3961.64	99.71	72.9123	0.07247	72.8398					40	3876.8	97.58	126.892	0.07103	126.821
41	3849.5	96.89	74.8308	0.07023	74.7606					41	3956.84	99.59	127.096	1e-05	127.096
42	3898.48	98.12	72.5469	0.07015	72.4768					42	3949.23	99.4	127.063	0.07429	126.988
43	3921.31	98.7	74.0552	0.07225	73.983					43	3856.25	97.06	127.109	0.07296	127.036
44	3968.88	99.9	59.0233	0.07267	58.9506					44	3878.08	97.61	124.682	0.07119	124.611
45	3943.68	99.26	65.0097	0.07127	64.9385					45	3954.69	99.54	126.836	0.07222	126.763
46	3927	98.84	59.9876	0.07318	59.9144					46	3849.93	96.9	127.074	0.071	127.003
47	3894.95	98.04	74.7791	0.07461	74.7045					47	3777.45	95.08	127.11	0.07213	127.038
48	3964.27	99.78	65.7345	0.06874	65.6658					48	3914.08	98.52	127.058	0.07075	126.987
49	3883.28	97.74	77.1087	0.07188	77.0369					49	3906.75	98.33	126.989	0.00015	126.989
50	3832.39	96.46	73.396	0.0715	73.3245					50	3942.44	99.23	127.049	0.07223	126.977
51	3970.41	99.93	76.8397	0.01429	76.8254					51	3939.21	99.15	125.059	0.07383	124.985
52	3962.77	99.74	50.9968	0.0739	50.9229					52	3969.91	99.92	127.059	0.07245	126.987
53	3912.91	98.49	77.7766	0.07338	77.7032					53	3922.6	98.73	127.094	0.07148	127.023
54	3972.35	99.98	66.2682	0.02036	66.2478					54	3902.34	98.22	126.988	0.06979	126.918
55	3964.22	99.78	76.6251	0.00113	76.624					55	3905.56	98.3	127.048	0.07203	126.975
56	3973	100	66.2386	0.058	66.1806					56	3953.7	99.51	127.082	0.07567	127.006
57	3846.45	96.81	77.7578	0.07108	77.6867					57	3888.16	97.86	127.057	0.07286	126.984
58	3860.12	97.16	51.0409	0.07172	50.9692					58	3962.45	99.73	127.056	0.0713	126.985
59	3939.34	99.15	73.4923	0.07791	73.4143					59	3900.93	98.19	127.046	0.00037	127.046
60	3929.69	98.91	80.1822	0.07207	80.1102					60	3941	99.19	127.047	0.00058	127.046
61	3957.63	99.61	73.4848	0.06927	73.4155					61	3859.79	97.15	127.097	0.072	127.025
62	3923.89	98.76	62.1959	0.06756	62.1283					62	3930.62	98.93	127.034	0.07283	126.961
63	3928.52	98.88	67.9524	0.07392	67.8785					63	3884.09	97.76	127.106	0.07137	127.034
64	3912.01	98.46	69.7084	0.07296	69.6354					64	3783.88	95.24	127.024	0.07295	126.951
65	3969.26	99.91	67.4615	0.07112	67.3904					65	3957.51	99.61	126.112	0.07504	126.036
66	3931.27	98.95	78.7729	0.07118	78.7017					66	3960.72	99.69	126.946	0.00051	126.945
67	3943.59	99.26	72.1043	0.04131	72.063					67	3868.32	97.36	126.999	0.0706	126.928
68	3937.34	99.1	40.5825	0.07066	40.5118					68	3962.01	99.72	127.04	0.0003	127.039
69	3923.23	98.75	71.7298	0.04144	71.6884					69	3914.83	98.54	126.941	0.00019	126.94
70	3961.8	99.72	57.8193	0.06972	57.7496					70	3852.04	96.96	127.069	0.07067	126.999
71	3971.98	99.97	60.3034	0.06625	60.2372					71	3919.04	98.64	126.984	0.06991	126.914
72	3835.67	96.54	33.1736	0.0698	33.1038					72	3929.64	98.91	126.865	0.07304	126.791
73	3966.38	99.83	63.4067	0.07169	63.335					73	3922.91	98.74	127.066	0.00037	127.065
74	3958.27	99.63	31.3365	0.06956	31.267					74	3963.3	99.76	126.875	0.00075	126.874
75	3959.57	99.66	71.0871	0.07055	71.0166					75	3912.89	98.49	126.864	0.00063	126.863
76	3936.31	99.08	76.4982	0.0714	76.4268					76	3812.53	95.96	127.109	0.07009	127.039
77	3806.03	95.8	77.8	0.07285	77.7271					77	3970.09	99.93	127.009	0.00026	127.009
78	3923.4	98.75	78.7968	0.07323	78.7235					78	3931.75	98.96	126.826	0.06727	126.759
79	3930.1	98.92	73.7104	0.07549	73.635					79	3932.6	98.98	127.011	0.006	127.005
80	3724.86	93.75	72.1062	0.07558	72.0306					80	3854.01	97	127.117	0.071	127.046
81	3964.74	99.79	76.5353	0.07291	76.4624					81	3968.47	99.89	127.066	0.00033	127.066
82	3945.23	99.3	40.5803	0.07234	40.508					82	3696.37	93.04	127.05	1e-05	127.05
83	3919.49	98.65	69.9005	0.06742	69.8331					83	3888.69	97.88	127.01	0.07306	126.936
84	3781.68	95.18	69.3652	0.02206	69.3432					84	3953.28	99.5	126.11	0.02672	126.083
85	3928.67	98.88	66.977	0.06831	66.9087					85	3912.66	98.48	127.014	0.0697	126.945
86	3958.02	99.62	79.9144	0.07389	79.8405					86	3936.82	99.09	124.776	0.07134	124.705
87	3963.77	99.77	69.8495	0.07101	69.7785					87	3971.85	99.97	123.44	0.07016	123.37
88	3893.4	98	69.3337	0.07246	69.2613					88	3951.43	99.46	127.004	0.07235	126.932
89	3932.28	98.97	58.5764	0.07047	58.5059					89	3972.67	99.99	127.013	1e-05	127.013
90	3964.74	99.79	66.2446	0.03742	66.2071					90	3821.94	96.2	127.014	0.07374	126.94
91	3800.48	95.66	74.2936	0.06997	74.2237					91	3911.36	98.45	126.896	0.07001	126.826
92	3965.78	99.82	72.7723	0.05603	72.7163					92	3852.55	96.97	127.135	0.06795	127.068
93	3895.53	98.05	76.422	0.07185	76.3502					93	3938.04	99.12	126.998	0.07026	126.927
94	3954.07	99.52	72.9036	0.06999	72.8336					94	3906.56	98.33	127.097	0.07176	127.025
95	3899.08	98.14	65.746	0.07096	65.675					95	3890.4	97.92	126.858	0.07311	126.785
96	3800.96	95.67	72.6406	0.07158	72.569					96	3793.62	95.48	127.052	0.06889	126.983
97	3885.68	97.8	70.2107	0.07419	70.1365					97	3959.42	99.66	127.057	0.00026	127.057
98	3840.88	96.67	76.5616	0.07148	76.4901					98	3957.74	99.62	126.53	0.07402	126.456
99	3926.14	98.82	72.5016	0.01909	72.4825					99	3893.17	97.99	127.027	0.00016	127.027
100	3947.26	99.35	59.3363	0.06914	59.2672					100	3940.96	99.19	126.974	0.06959	126.904
101	3972.67	99.99	64.7065	0.06961	64.6369					101	3914.76	98.53	126.998	0.06886	126.929
102	3969.39	99.91	75.6347	0.06696	75.5677					102	3951.14	99.45	127.052	0.07054	126.981
103	3916.14	98.57	62.3483	0.07103	62.2773					103	3804.67	95.76	127.087	0.07328	127.014
104	3857.21	97.09	70.8236	0.07227	70.7514					104	3966.86	99.85	125.809	0.00941	125.8
105	3966.53	99.84	76.3808	0.02246	76.3583					105	3918.21	98.62	127.06	0.0709	126.99
106	3909.8	98.41	76.3307	0.07636	76.2543					106	3912.19	98.47	124.85	0.07003	124.78
107	3951.11	99.45	71.3572	0.07142	71.2857					107	3879.75	97.65	127.099	0.07076	127.029
108	3956.84	99.59	70.2218	0.01455	70.2073					108	3930.1	98.92	124.688	0.0708	124.617
109	3972.03	99.98	77.805	0.00113	77.8039					109	3926.49	98.83	125.506	0.07255	125.434
110	3914.87	98.54	73.9647	0.07128	73.8934					110	3891.38	97.95	126.777	0.07051	126.706
111	3847.72	96.85	75.2052	0.06761	75.1376					111	3859.79	97.15	126.895	0.07228	126.823
112	3859.53	97.14	74.2316	0.0722	74.1594					112	3925.97	98.82	126.898	0.00023	126.898
113	3949.23	99.4	54.6689	0.04637	54.6225					113	3914.87	98.54	127.061	0.07504	126.986
114	3963.77	99.77	72.6215	0.06813	72.5533					114	3956.63	99.59	127.073	0.07281	127
115	3801.61	95.69	68.9317	0.07054	68.8612					115	3961.07	99.7	126.993	0.07162	126.922
116	3948.2	99.38	70.4932	0.07009	70.4232					116	3950.7	99.44	126.988	0.0011	126.987
117	3906.39	98.32	61.4038	0.07319	61.3306					117	3853.29	96.99	127.118	0.07675	127.041
118	3824.3	96.26	8.0651	0.07154	7.99356					118	3947.49	99.36	127.039	0.06986	126.969
119	3921.41	98.7	79.2213	0.07196	79.1494					119	3893.29	97.99	127.052	0.06758	126.984
120	3970.09	99.93	68.9297	0.06433	68.8654					120	3959.05	99.65	127.098	0.07146	127.027
121	3957.28	99.6	64.8057	0.0763	64.7294					121	3890.38	97.92	126.843	0.06728	126.776
122	3876.85	97.58	76.3657	0.07097	76.2947					122	3961.64	99.71	127.003	0.07065	126.933
123	3863.93	97.25	74.4069	0.06977	74.3371					123	3960.61	99.69	127.055	0.00045	127.054
124	3965.26	99.8	70.5735	0.07238	70.5011					124	3754.03	94.49	127.099	0.06771	127.032
125	3832.55	96.46	72.2176	0.06939	72.1482					125	3947.56	99.36	127.067	0.07048	126.997
126	3972.35	99.98	66.4702	0.07196	66.3982					126	3968.8	99.89	127.037	0.0003	127.037
127	3893.4	98	61.5071	0.07315	61.4339					127	3897.05	98.09	126.993	0.0005	126.992
128	3888.97	97.88	74.5314	0.02222	74.5091					128	3953.7	99.51	127.001	0.0684	126.933
129	3951.99	99.47	63.7781	0.05106	63.7271					129	3949.55	99.41	126.891	0.07099	126.82
130	3955.25	99.55	68.6489	0.07384	68.5751					130	3952.33	99.48	126.773	0.07365	126.699
131	3970.95	99.95	58.212	0.07157	58.1405					131	3966.86	99.85	127.057	0.00045	127.057
132	3968.5	99.89	68.1631	0.07384	68.0892					132	3819.59	96.14	126.984	0.07075	126.914
133	3967.5	99.86	80.9654	0.00102	80.9644					133	3898.99	98.14	126.189	0.02167	126.167
134	3849.79	96.9	75.7912	0.07261	75.7186					134	3747.73	94.33	127.071	0.07098	127
135	3698.8	93.1	62.5528	0.06866	62.4842					135	3968.36	99.88	127.027	0.07341	126.953
136	3937.34	99.1	61.8974	0.04267	61.8547					136	3971.46	99.96	126.972	0.00083	126.971
137	3807.37	95.83	74.076	0.07256	74.0035					137	3945.67	99.31	126.927	0.07198	126.855
138	3949.73	99.41	73.5494	0.00324	73.5461					138	3907.87	98.36	127.058	0.07286	126.985
139	3968.8	99.89	71.9244	0.02046	71.9039					139	3875.49	97.55	127.094	0.06721	127.027
140	3915.42	98.55	78.1132	0.07036	78.0429					140	3967.5	99.86	127.092	0.00017	127.092
141	3934.36	99.03	70.6853	0.06755	70.6178					141	3749.3	94.37	127.101	0.0691	127.031
142	3931.14	98.95	68.1049	0.07341	68.0315					142	3880.42	97.67	127.053	0.06907	126.984
143	3880.47	97.67	73.9075	0.07175	73.8358					143	3838.19	96.61	127.085	0.07102	127.014
144	3935.42	99.05	70.8667	0.06936	70.7973					144	3961.5	99.71	126.968	0.07157	126.896
145	3900.25	98.17	72.747	0.07321	72.6738					145	3705.52	93.27	127.072	0.0691	127.003
146	3940.44	99.18	69.7549	0.07322	69.6817					146	3886.68	97.83	124.941	0.07205	124.869
147	3866.91	97.33	71.6773	0.068	71.6093					147	3958.3	99.63	127.094	0.07089	127.023
148	3836.56	96.57	65.964	0.07078	65.8933					148	3773.34	94.97	127.016	0.07087	126.945
149	3768.8	94.86	66.5138	0.07055	66.4433					149	3928.03	98.87	126.875	0.07226	126.803
150	3941.74	99.21	73.3459	0.07163	73.2743					150	3800.34	95.65	127.04	0.07159	126.969
151	3953.19	99.5	71.313	0.07063	71.2423					151	3962.45	99.73	127.056	0.07366	126.983
152	3907.86	98.36	72.6092	0.07107	72.5382					152	3940.5	99.18	127.029	0.06771	126.961
153	3972.67	99.99	65.4728	0.06984	65.4029					153	3956.99	99.6	127.045	0.07141	126.974
154	3889.78	97.91	71.8111	0.07419	71.7369					154	3783.79	95.24	127.029	0.0036	127.025
155	3914.07	98.52	38.6784	0.06974	38.6087					155	3972.67	99.99	127.043	0.00041	127.043
156	3891.99	97.96	70.8918	0.0691	70.8227					156	3879.59	97.65	126.791	0.07143	126.72
157	3952.33	99.48	73.3684	0.07185	73.2966					157	3914.87	98.54	126.854	0.06657	126.788
158	3931.65	98.96	74.7218	0.07399	74.6478					158	3931.75	98.96	126.969	0.06986	126.899
159	3908.39	98.37	72.9778	0.07242	72.9054					159	3890.86	97.93	127.013	0.07045	126.943
160	3968.15	99.88	58.8643	0.0741	58.7902					160	3905.8	98.31	126.997	0.06938	126.927
161	3970.41	99.93	63.822	0.07142	63.7505					161	3840.3	96.66	127.112	0.07377	127.038
162	3932.3	98.98	73.8773	0.07064	73.8067					162	3818.95	96.12	127.09	0.07028	127.02
163	3946.64	99.34	74.7354	0.06958	74.6658					163	3842.76	96.72	126.924	0.00098	126.923
164	3840.54	96.67	74.8406	0.06717	74.7734					164	3972.67	99.99	126.918	0.00086	126.917
165	3939.66	99.16	74.4552	0.07217	74.383					165	3868.58	97.37	126.977	0.07244	126.905
166	3962.66	99.74	61.6143	0.07086	61.5435					166	3958.78	99.64	126.98	0.00052	126.979
167	3816.36	96.06	74.9209	0.06897	74.8519					167	3910.67	98.43	127.092	0.0719	127.02
168	3932.42	98.98	62.5553	0.07238	62.4829					168	3967.5	99.86	127.042	0.00027	127.041
169	3947.47	99.36	66.9369	0.06841	66.8685					169	3883.16	97.74	127.108	1e-05	127.108
170	3927.52	98.85	70.3372	0.06951	70.2677					170	3881.51	97.7	127.073	0.07353	126.999
171	3888.47	97.87	78.7129	0.07326	78.6396					171	3897.28	98.09	127.069	0.07372	126.995
172	3824.64	96.27	66.9039	0.07025	66.8336					172	3933.04	98.99	127.068	0.07162	126.996
173	3692.27	92.93	65.6158	0.06514	65.5507					173	3930.62	98.93	126.896	0.06766	126.828
174	3833.94	96.5	75.8273	0.07309	75.7542					174	3962.67	99.74	127.074	0.07606	126.998
175	3971.7	99.97	65.0952	0.07272	65.0225					175	3943.91	99.27	127.093	1e-05	127.093
176	3889.76	97.9	70.8156	0.07313	70.7425					176	3924.04	98.77	127.073	0.06771	127.006
177	3927.55	98.86	77.9968	0.0753	77.9215					177	3916.66	98.58	127.023	0.07127	126.952
178	3953.37	99.51	62.1267	0.07762	62.0491					178	3927.66	98.86	127.009	0.07105	126.938
179	3906.12	98.32	72.8898	0.07274	72.817					179	3908.91	98.39	127.093	0.07107	127.022
180	3900.96	98.19	78.7634	0.07288	78.6906					180	3937.75	99.11	127.112	0.06969	127.042
181	3924.2	98.77	73.7282	0.03936	73.6888					181	3970.41	99.93	126.904	0.0044	126.9
182	3737.43	94.07	73.6457	0.0742	73.5715					182	3949.41	99.41	127.023	0.00053	127.023
183	3746.57	94.3	68.7348	0.06982	68.665					183	3945.02	99.3	126.977	0.07126	126.906
184	3760.17	94.64	70.4903	0.07185	70.4184					184	3918.73	98.63	127.028	0.06976	126.959
185	3894.79	98.03	67.4593	0.02403	67.4353					185	3920.98	98.69	127.008	0.07212	126.936
186	3961.64	99.71	71.6713	0.07298	71.5984					186	3937.59	99.11	127.004	0.07163	126.932
187	3803.83	95.74	81.4485	0.07285	81.3757					187	3606.98	90.79	127.122	0.06673	127.055
188	3971.46	99.96	63.8638	0.07096	63.7929					188	3962.5	99.74	127.127	0.07206	127.055
189	3968.5	99.89	59.5651	0.06701	59.4981					189	3973	100	126.974	0.00053	126.973
190	3967.84	99.87	77.7328	0.07238	77.6604					190	3917.04	98.59	127.039	0.06991	126.969
191	3931.08	98.94	80.3165	0.07342	80.2431					191	3929.69	98.91	127.092	0.00032	127.092
192	3958.13	99.63	60.7577	0.01301	60.7447					192	3931.95	98.97	127.006	0.00057	127.006
193	3923.9	98.76	72.9134	0.07118	72.8422					193	3946.52	99.33	126.997	0.06995	126.928
194	3799.43	95.63	72.0803	0.07094	72.0093					194	3786.38	95.3	127.113	0.07182	127.042
195	3872.2	97.46	73.4943	0.07052	73.4238					195	3929.64	98.91	127.006	0.07381	126.933
196	3939.93	99.17	74.6139	0.07209	74.5418					196	3945.61	99.31	127.087	0.07222	127.015
197	3959.05	99.65	58.347	0.07273	58.2743					197	3941.42	99.2	126.438	0.06491	126.373
198	3947.47	99.36	70.4509	0.01986	70.4311					198	3763.61	94.73	127.105	0.07107	127.034
199	3928.34	98.88	78.1292	0.07543	78.0538					199	3879.57	97.65	127.08	0.07258	127.008
200	3949.75	99.41	60.6088	0.07126						200	3880.07	97.66	127.017	0.07048	126.947

## Sheet: 08_RBACO_Seeds(225)
Fast Converegnce Exp							Fast Converegnce Exp			Slow Converegnce Exp							Slow Converegnce Exp
#	CBLF	Quality	Taumax	Taumin	DeltaTauminmax		Global Optimal Solution =	3973		#	CBLF	Quality	Taumax	Taumin	DeltaTauminmax		Global Optimal Solution =	3972.67
1	3874.78	97.53	74.6031	0.07086	74.5323		Minimum Optimal Solution =	3699.88		1	3874.78	97.53	127.084	0.07086	127.014		Minimum Optimal Solution =	3651.21
2	3875.93	97.56	67.2207	0.06952	67.1512		Mean of Optimal Solution =	3910.77		2	3765.93	94.79	126.938	0.06912	126.869		Mean of Optimal Solution =	3910.36
3	3949.75	99.41	61.6546	0.07047	61.5841		Median of Optimal Solution=	3910.77		3	3969.26	99.91	125.65	0.07524	125.575		Median of Optimal Solution =	3910.36
4	3845.83	96.8	76.4126	0.07519	76.3374		Solution Standrad Deviation =	58.4206		4	3893.14	97.99	127.092	0.07228	127.02		Solution Standrad Deviation =	63.7853
5	3851.54	96.94	70.9783	0.06736	70.9109		Average Price =	15.34		5	3875.24	97.54	127.083	0.07029	127.013		Average Price =	61.37
6	3967.5	99.86	68.7175	0.06857	68.6489		Relability =	5.5		6	3946.65	99.34	127.029	0.06943	126.959		Relability =	6
7	3804.71	95.76	76.4284	0.06838	76.3601		Normalized Price =	278.909		7	3873.75	97.5	126.966	0.07009	126.896		Normalized Price =	1022.83
8	3878.92	97.63	74.9818	0.07281	74.909		Average Solution Quality =	98.4335		8	3846.35	96.81	127.112	0.07215	127.04		Average Solution Quality =	98.423
9	3969.26	99.91	63.4561	0.07524	63.3809		Average FDC =	-78.7832		9	3951.67	99.46	126.962	0.00086	126.961		Average FDC =	-25.9208
10	3909.42	98.4	77.0757	0.07247	77.0032		Correlation Coefficent =	-1		10	3945.67	99.31	127.051	0.07061	126.98		Correlation Coefficent =	-1
11	3972.67	99.99	72.301	0.0328	72.2682		Solution Robustness =	66.9416		11	3843.01	96.73	127.061	0.06968	126.992		Solution Robustness =	61.3049
12	3941.48	99.21	48.2469	0.07097	48.176		Performance Rate =	0.0035854		12	3938.44	99.13	126.724	0.07139	126.653		Performance Rate =	0.00097768
13	3962.16	99.73	50.6594	0.0169	50.6425		Average Elapsed Time =	0.78296		13	3932.92	98.99	127.079	0.00093	127.078		Average Elapsed Time =	2.858
14	3955.44	99.56	74.7647	0.07681	74.6879					14	3959.05	99.65	127.084	0.0696	127.015
15	3955.55	99.56	64.607	0.07374	64.5332					15	3960.39	99.68	126.376	0.00054	126.375
16	3968.36	99.88	62.3946	0.05993	62.3347					16	3965.7	99.82	126.983	0.0706	126.913
17	3937.38	99.1	66.4374	0.06986	66.3675					17	3972.5	99.99	126.985	0.00237	126.983
18	3935.92	99.07	74.817	0.07225	74.7447					18	3954.72	99.54	127.038	0.07094	126.967
19	3925.84	98.81	68.8651	0.0732	68.7919					19	3959.89	99.67	127.111	0.0731	127.037
20	3925.45	98.8	75.4189	0.07199	75.3469					20	3750.05	94.39	127.097	0.06948	127.027
21	3967.84	99.87	63.3526	0.07219	63.2804					21	3962.98	99.75	126.838	0.00103	126.837
22	3908.73	98.38	72.7607	0.07129	72.6894					22	3864.96	97.28	126.829	0.07002	126.759
23	3960.61	99.69	67.7503	0.07374	67.6766					23	3957.48	99.61	127.067	0.00077	127.067
24	3961.12	99.7	68.4375	0.07043	68.3671					24	3966.03	99.82	126.925	0.06795	126.857
25	3958.6	99.64	71.1102	0.07339	71.0369					25	3852.8	96.97	127.069	0.07335	126.996
26	3958.27	99.63	71.7719	0.06716	71.7047					26	3856.17	97.06	127.049	0.07169	126.977
27	3931.65	98.96	55.2753	0.07306	55.2022					27	3914.32	98.52	127.047	0.07241	126.974
28	3967.85	99.87	66.519	0.07079	66.4482					28	3967.85	99.87	127.032	0.0714	126.961
29	3903.22	98.24	56.2568	0.06717	56.1897					29	3959.57	99.66	126.961	0.00058	126.961
30	3916.66	98.58	53.2918	0.07196	53.2198					30	3754.89	94.51	127.117	0.07283	127.044
31	3819.47	96.14	72.6527	0.07281	72.5799					31	3962.66	99.74	127.103	1e-05	127.103
32	3929.19	98.9	72.8916	0.06494	72.8267					32	3907.84	98.36	127.025	0.0718	126.953
33	3855.66	97.05	70.1342	0.0717	70.0625					33	3918.21	98.62	127.115	0.07014	127.045
34	3922.21	98.72	62.2182	0.07138	62.1468					34	3970.73	99.94	126.858	0.00011	126.858
35	3825.15	96.28	74.2547	0.06792	74.1868					35	3963.19	99.75	127.115	0.07248	127.043
36	3964.92	99.8	67.173	0.04726	67.1257					36	3824.64	96.27	127.029	0.07114	126.958
37	3817.23	96.08	61.3308	0.07012	61.2606					37	3886.16	97.81	127.108	0.0722	127.036
38	3897.08	98.09	74.08	0.06588	74.0141					38	3912.01	98.46	127.021	0.07254	126.948
39	3910.62	98.43	75.5625	0.06178	75.5007					39	3935.01	99.04	127.054	0.07426	126.98
40	3938.89	99.14	71.7306	0.0739	71.6568					40	3948.72	99.39	127.058	0.07417	126.984
41	3882.45	97.72	69.224	0.07104	69.1529					41	3962.67	99.74	127.032	0.00041	127.032
42	3871.17	97.44	68.5537	0.06905	68.4846					42	3921.87	98.71	127.046	0.07486	126.972
43	3825.15	96.28	72.1864	0.07233	72.114					43	3945.64	99.31	126.991	0.07194	126.919
44	3895.08	98.04	72.8156	0.07256	72.743					44	3923.67	98.76	126.986	0.06987	126.916
45	3853.86	97	74.8241	0.07566	74.7484					45	3906.32	98.32	127.054	0.06996	126.984
46	3844.28	96.76	78.2527	0.07568	78.177					46	3971.46	99.96	127.021	0.00024	127.02
47	3875.82	97.55	78.9126	0.06751	78.8451					47	3927.52	98.85	126.477	0.00118	126.476
48	3965.78	99.82	75.2207	0.04073	75.18					48	3956.99	99.6	127.051	0.00062	127.051
49	3941.6	99.21	76.6932	0.07246	76.6208					49	3959.22	99.65	126.891	0.07196	126.819
50	3837.13	96.58	62.7234	0.07288	62.6505					50	3777.8	95.09	127.034	0.00641	127.027
51	3963.95	99.77	59.2695	0.07189	59.1976					51	3966.56	99.84	127.039	0.07174	126.968
52	3762.76	94.71	78.1182	0.07202	78.0462					52	3958.54	99.64	127.053	0.0751	126.978
53	3934.75	99.04	71.3117	0.0702	71.2415					53	3953.61	99.51	127.069	0.0005	127.069
54	3946.85	99.34	78.8671	0.07332	78.7938					54	3952.31	99.48	126.934	0.00014	126.934
55	3958.8	99.64	56.2717	0.06983	56.2019					55	3846.75	96.82	127.112	0.07082	127.042
56	3960.07	99.67	63.9913	0.07344	63.9179					56	3908.2	98.37	126.807	0.07062	126.737
57	3856.86	97.08	58.1461	0.06924	58.0769					57	3926.81	98.84	127.029	0.07265	126.956
58	3958.02	99.62	60.916	0.06727	60.8487					58	3802.72	95.71	127.032	0.07077	126.961
59	3966.05	99.82	61.9889	0.074	61.9149					59	3929.39	98.9	127.036	0.07148	126.964
60	3940.12	99.17	74.3632	0.07178	74.2914					60	3952.96	99.5	126.994	0.00021	126.994
61	3948.2	99.38	76.6355	0.07292	76.5626					61	3972.67	99.99	127.07	0.00014	127.07
62	3964.59	99.79	57.5506	0.07342	57.4772					62	3835.42	96.54	127.003	0.07302	126.93
63	3793.46	95.48	73.0354	0.0713	72.9641					63	3852.9	96.98	127.014	0.07155	126.942
64	3883.57	97.75	73.0244	0.07445	72.9499					64	3946.13	99.32	126.959	0.07365	126.885
65	3855.23	97.04	67.0171	0.06913	66.948					65	3961.94	99.72	126.972	0.07022	126.902
66	3972.03	99.98	77.6716	0.07071	77.6009					66	3906.32	98.32	127.079	0.00039	127.079
67	3972.03	99.98	74.4394	0.04649	74.393					67	3931.8	98.96	127.025	0.06776	126.957
68	3827.98	96.35	77.3414	0.07147	77.2699					68	3798.63	95.61	127.091	0.07204	127.019
69	3922.05	98.72	70.8669	0.06865	70.7982					69	3919.3	98.65	126.842	0.07233	126.77
70	3952.13	99.47	73.3586	0.07154	73.2871					70	3954.92	99.54	127.045	0.07332	126.971
71	3953.28	99.5	71.2579	0.07184	71.1861					71	3922.35	98.72	127.04	0.07313	126.967
72	3929.69	98.91	73.1033	0.06598	73.0374					72	3719.17	93.61	127.064	0.07207	126.992
73	3895.78	98.06	64.5279	0.07202	64.4559					73	3782.24	95.2	126.776	0.07425	126.701
74	3964.59	99.79	74.4121	0.04198	74.3702					74	3955.44	99.56	126.901	0.0692	126.832
75	3879.19	97.64	69.0517	0.06868	68.983					75	3960.39	99.68	127.087	0.0008	127.086
76	3911.49	98.45	73.9096	0.07048	73.8392					76	3921.91	98.71	127.015	0.07531	126.94
77	3875.69	97.55	76.8688	0.07169	76.7971					77	3966.53	99.84	127.082	0.00027	127.082
78	3896.5	98.07	69.6175	0.07138	69.5461					78	3948.2	99.38	127.048	0.07085	126.977
79	3948.9	99.39	74.5852	0.07507	74.5102					79	3955.22	99.55	127.066	0.00016	127.066
80	3902.21	98.22	74.0677	0.07431	73.9934					80	3952.78	99.49	127.07	0.07363	126.996
81	3838.19	96.61	77.7539	0.06944	77.6845					81	3941.35	99.2	127.021	0.0695	126.952
82	3958.02	99.62	62.1785	0.01161	62.1669					82	3901.4	98.2	127.006	0.06853	126.937
83	3960.53	99.69	70.5899	0.07337	70.5166					83	3923.99	98.77	127.051	0.06876	126.982
84	3864.96	97.28	78.9379	0.07326	78.8646					84	3865.48	97.29	127.141	0.07137	127.07
85	3916.07	98.57	76.3477	0.07106	76.2766					85	3959.42	99.66	127.003	0.00045	127.002
86	3881.95	97.71	63.5478	0.07152	63.4763					86	3956.99	99.6	127.042	0.07244	126.97
87	3729.98	93.88	69.3526	0.01583	69.3368					87	3895.48	98.05	126.996	0.07061	126.926
88	3818.21	96.1	76.4421	0.07064	76.3715					88	3933.72	99.01	127.066	0.07251	126.994
89	3951.25	99.45	71.8207	0.07219	71.7485					89	3888.47	97.87	127.108	0.07158	127.036
90	3962.67	99.74	60.9315	0.07175	60.8598					90	3908.39	98.37	126.854	0.06954	126.785
91	3971.06	99.95	57.7535	0.07348	57.68					91	3808.29	95.85	126.781	0.07032	126.711
92	3935.33	99.05	73.595	0.07234	73.5227					92	3949.75	99.41	127.045	0.07067	126.974
93	3970.41	99.93	76.0824	0.00113	76.0813					93	3854.95	97.03	127.007	0.06533	126.942
94	3848.42	96.86	75.3721	0.07171	75.3004					94	3945.53	99.31	126.993	0.00019	126.993
95	3900.12	98.17	78.1107	0.07226	78.0384					95	3853.87	97	127.136	0.06923	127.067
96	3942.06	99.22	68.5343	0.07491	68.4593					96	3873.75	97.5	127.084	0.0702	127.013
97	3874.12	97.51	76.8552	0.06991	76.7853					97	3717.1	93.56	126.927	0.06696	126.86
98	3949.73	99.41	47.0983	0.07516	47.0231					98	3948.72	99.39	127.051	0.06775	126.983
99	3960.74	99.69	74.9702	0.0749	74.8953					99	3949.08	99.4	126.993	0.0006	126.993
100	3888.23	97.87	77.358	0.07461	77.2834					100	3862.07	97.21	127.098	0.07211	127.026
101	3879.97	97.66	77.1123	0.0741	77.0382					101	3859.01	97.13	127.054	0.06675	126.988
102	3960.74	99.69	58.9508	0.07102	58.8798					102	3956.45	99.58	127.027	0.07389	126.953
103	3941.28	99.2	67.1938	0.07527	67.1185					103	3870.93	97.43	127.073	0.07263	127
104	3765.92	94.79	72.4069	0.07255	72.3343					104	3967.84	99.87	126.94	0.06995	126.87
105	3946.85	99.34	60.8165	0.06779	60.7487					105	3969.76	99.92	127.091	0.00062	127.09
106	3829.94	96.4	71.9941	0.0715	71.9226					106	3955.95	99.57	127.007	0.072	126.935
107	3900.89	98.18	60.1832	0.06776	60.1154					107	3906.32	98.32	126.84	0.07502	126.765
108	3951.02	99.45	71.1889	0.00074	71.1882					108	3808.29	95.85	127.084	0.07074	127.013
109	3955.55	99.56	69.5062	0.05154	69.4547					109	3651.2	91.9	127.11	0.06704	127.043
110	3964.22	99.78	61.1602	0.07455	61.0857					110	3902.66	98.23	127.027	0.07253	126.954
111	3852.55	96.97	73.9869	0.07029	73.9166					111	3831.93	96.45	127.079	0.07471	127.005
112	3889.59	97.9	72.5749	0.07406	72.5009					112	3897.02	98.09	127.014	0.06965	126.944
113	3809.64	95.89	66.9433	0.06916	66.8741					113	3924.42	98.78	127.086	0.07329	127.013
114	3964.22	99.78	58.9836	0.0699	58.9137					114	3969.44	99.91	127.091	0.00029	127.09
115	3848.48	96.87	77.2407	0.07436	77.1663					115	3958.6	99.64	127.012	0.07271	126.939
116	3831.36	96.43	77.9833	0.07473	77.9086					116	3949.23	99.4	127.073	0.07426	126.999
117	3896.49	98.07	61.5192	0.07098	61.4482					117	3930.62	98.93	127.024	0.0687	126.955
118	3949.41	99.41	66.3572	0.0474	66.3098					118	3970.73	99.94	127.024	0.00041	127.024
119	3926.55	98.83	71.805	0.0686	71.7364					119	3953.37	99.51	127.078	0.07107	127.006
120	3941.48	99.21	67.1239	0.06635	67.0575					120	3887.19	97.84	127.015	0.07123	126.944
121	3915.63	98.56	78.7127	0.07475	78.638					121	3824.64	96.27	126.924	0.07242	126.852
122	3961.64	99.71	62.9592	0.07456	62.8846					122	3734.66	94	127.066	0.06944	126.997
123	3964.09	99.78	62.557	0.07104	62.486					123	3922.91	98.74	127.055	0.00031	127.054
124	3932.3	98.98	68.5216	0.07537	68.4463					124	3962.67	99.74	126.918	0.00121	126.917
125	3759.5	94.63	77.9099	0.07407	77.8358					125	3946.29	99.33	126.942	0.07142	126.871
126	3973	100	65.5438	0.07123	65.4726					126	3931.65	98.96	127.063	0.07316	126.989
127	3939.93	99.17	67.4604	0.06886	67.3915					127	3964.92	99.8	127.049	1e-05	127.049
128	3931.45	98.95	73.6007	0.07066	73.53					128	3879.95	97.66	127.098	0.07349	127.024
129	3925.26	98.8	68.1854	0.0716	68.1138					129	3936.48	99.08	126.876	0.00104	126.875
130	3967.84	99.87	70.7497	0.07279	70.6769					130	3966.38	99.83	127.069	0.07113	126.998
131	3893.4	98	65.6917	0.06679	65.6249					131	3894.16	98.02	126.991	0.07057	126.921
132	3745.31	94.27	75.8705	0.06898	75.8015					132	3958.02	99.62	127.097	0.07335	127.024
133	3915.63	98.56	61.8712	0.07193	61.7992					133	3971.98	99.97	126.97	0.07027	126.9
134	3958.78	99.64	65.2066	0.07161	65.1349					134	3895.39	98.05	127.02	0.0702	126.95
135	3917.7	98.61	73.2047	0.07258	73.1321					135	3832.78	96.47	126.801	0.07177	126.729
136	3920.64	98.68	77.2389	0.04199	77.197					136	3966.81	99.84	127.085	0.00015	127.084
137	3962.45	99.73	78.8759	0.07125	78.8046					137	3968.36	99.88	126.954	0.00028	126.954
138	3963.19	99.75	78.5505	0.07248	78.478					138	3891.56	97.95	127.082	0.00016	127.082
139	3943.29	99.25	76.4335	0.07197	76.3616					139	3948.88	99.39	126.913	0.07545	126.837
140	3873.73	97.5	75.9037	0.06976	75.8339					140	3901.67	98.2	127.052	0.07156	126.98
141	3759.55	94.63	77.9807	0.07111	77.9095					141	3738.45	94.1	127.107	0.07266	127.034
142	3892.88	97.98	64.6458	0.07384	64.5719					142	3873.75	97.5	127.108	0.06933	127.038
143	3895.87	98.06	75.93	0.07054	75.8595					143	3969.26	99.91	127.061	0.06877	126.992
144	3967.18	99.85	66.0337	0.01986	66.0138					144	3893.29	97.99	126.975	0.06685	126.908
145	3923.9	98.76	68.6822	0.07387	68.6083					145	3910.76	98.43	126.543	0.06695	126.476
146	3886.16	97.81	77.6013	0.0722	77.5291					146	3963.62	99.76	126.771	0.00021	126.771
147	3921.73	98.71	54.6578	0.07382	54.584					147	3903.53	98.25	126.843	0.07271	126.771
148	3922.58	98.73	77.9684	0.02339	77.945					148	3828.26	96.36	127.059	0.06838	126.991
149	3973	100	68.9821	0.05124	68.9308					149	3953.61	99.51	127.02	0.00094	127.019
150	3941.97	99.22	75.9174	0.01829	75.8991					150	3966.05	99.82	126.946	0.07321	126.873
151	3864.36	97.27	63.1983	0.07037	63.1279					151	3963.77	99.77	127.034	0.07125	126.963
152	3944	99.27	70.6486	0.07367	70.5749					152	3875.43	97.54	127.071	0.0735	126.998
153	3935.83	99.06	73.2888	0.07239	73.2164					153	3836.74	96.57	127.016	0.07262	126.943
154	3935.01	99.04	70.741	0.07426	70.6667					154	3940.96	99.19	127.131	0.07282	127.058
155	3908.69	98.38	68.9474	0.05842	68.889					155	3949.23	99.4	127.091	0.07104	127.02
156	3954.37	99.53	72.3897	0.06959	72.3201					156	3786.02	95.29	127.081	0.06934	127.012
157	3853.59	96.99	76.7572	0.07512	76.6821					157	3907.87	98.36	127.073	0.07176	127.001
158	3972.67	99.99	69.9217	0.05765	69.8641					158	3936.62	99.08	127.062	0.07315	126.989
159	3960.72	99.69	74.9482	0.07486	74.8733					159	3935.51	99.06	127.09	0.00018	127.09
160	3970.41	99.93	74.8315	0.07044	74.7611					160	3875.84	97.55	126.999	0.06885	126.93
161	3925.49	98.8	52.9155	0.07455	52.841					161	3956.33	99.58	127	0.06656	126.934
162	3962.67	99.74	67.9359	0.05259	67.8833					162	3865.48	97.29	127.113	0.06789	127.045
163	3954.92	99.54	56.3975	0.07181	56.3257					163	3930.08	98.92	127.022	0.07427	126.948
164	3867.8	97.35	64.9183	0.06959	64.8487					164	3922.86	98.74	127.09	0.07049	127.02
165	3903.4	98.25	69.5168	0.06945	69.4474					165	3969.91	99.92	126.927	0.06827	126.859
166	3956.47	99.58	64.1883	0.03749	64.1508					166	3947.91	99.37	126.477	0.06789	126.409
167	3961.07	99.7	61.3019	0.0694	61.2325					167	3868.67	97.37	127.065	0.07168	126.993
168	3972.67	99.99	45.006	0.03362	44.9724					168	3939.93	99.17	126.95	0.06968	126.88
169	3754.84	94.51	72.33	0.07169	72.2584					169	3971.46	99.96	127.006	0.00032	127.006
170	3862.53	97.22	18.4979	0.07308	18.4249					170	3952.33	99.48	127.017	0.07038	126.947
171	3928.1	98.87	71.3426	0.06862	71.2739					171	3958.92	99.65	127.085	0.07341	127.012
172	3822.08	96.2	73.3012	0.00324	73.2979					172	3968.36	99.88	127.11	1e-05	127.11
173	3931.4	98.95	44.0695	0.0718	43.9977					173	3950.27	99.43	127.073	0.0679	127.005
174	3963.3	99.76	69.1458	0.05194	69.0938					174	3708.97	93.35	127.062	0.00017	127.062
175	3949.41	99.41	68.6235	0.02992	68.5936					175	3958.54	99.64	127.016	0.07345	126.943
176	3933.39	99	69.1029	0.07161	69.0313					176	3931.14	98.95	126.976	0.07463	126.901
177	3906.32	98.32	73.1631	0.06996	73.0931					177	3964.27	99.78	126.924	0.00068	126.924
178	3878.74	97.63	67.8503	0.07516	67.7751					178	3968.36	99.88	127.069	0.07193	126.997
179	3954.6	99.54	66.8493	0.06907	66.7802					179	3937.75	99.11	127.075	0.07221	127.002
180	3960.09	99.67	64.3344	0.07167	64.2627					180	3931.14	98.95	126.901	0.07117	126.83
181	3959.24	99.65	78.2593	0.07373	78.1856					181	3954.92	99.54	127.101	0.07339	127.027
182	3952.31	99.48	36.0219	0.06909	35.9528					182	3877.37	97.59	127.138	0.07437	127.064
183	3956.63	99.59	65.3252	0.06766	65.2576					183	3963.19	99.75	127.082	0.07281	127.01
184	3910.62	98.43	72.2606	0.02161	72.239					184	3806.13	95.8	127.079	0.06815	127.011
185	3906.45	98.32	72.0158	0.07219	71.9436					185	3957.95	99.62	127.044	0.07562	126.968
186	3713.79	93.48	78.4944	0.07302	78.4214					186	3890.42	97.92	127.068	0.07184	126.996
187	3858.34	97.11	73.6252	0.0692	73.556					187	3967.84	99.87	127.042	0.00071	127.041
188	3956.86	99.59	80.4857	0.07229	80.4134					188	3955.25	99.55	127.086	0.07089	127.015
189	3912.84	98.49	64.5288	0.07049	64.4583					189	3792.07	95.45	127.018	0.06906	126.949
190	3915.8	98.56	78.2074	0.04884	78.1586					190	3833.47	96.49	127.042	0.07285	126.97
191	3939.93	99.17	71.55	0.07189	71.4781					191	3921.87	98.71	127.067	0.06654	127
192	3963.65	99.76	72.3721	0.07183	72.3002					192	3924.41	98.78	127.057	0.06915	126.988
193	3896.69	98.08	64.9041	0.07413	64.83					193	3921.96	98.72	127.092	0.07149	127.021
194	3939.93	99.17	65.7653	0.07159	65.6937					194	3954.58	99.54	127.077	0.00037	127.076
195	3699.88	93.13	75.6788	0.06824	75.6105					195	3917.7	98.61	126.989	0.07106	126.918
196	3921.31	98.7	61.0802	0.07287	61.0073					196	3702.63	93.19	127.092	0.07141	127.021
197	3896.72	98.08	74.154	0.06973	74.0843					197	3905.22	98.29	127.113	0.06905	127.044
198	3926.53	98.83	64.9878	0.07156	64.9162					198	3903.22	98.24	127.095	0.07114	127.024
199	3734.25	93.99	77.9862	0.07037	77.9158					199	3939.41	99.15	127.062	0.0705	126.992
200	3953.75	99.52	62.9922	0.07236	62.9198					200	3930.66	98.93	126.978	0.00145	126.976

## Sheet: 09_RBACO_Seeds(11)
Fast Converegnce Exp							Fast Converegnce Exp			Slow Converegnce Exp							Slow Converegnce Exp
#	CBLF	Quality	Taumax	Taumin	DeltaTauminmax		Global Optimal Solution =	3973.01		#	CBLF	Quality	Taumax	Taumin	DeltaTauminmax		Global Optimal Solution =	3972.67
1	3905.8	98.31	77.6859	0.0729	77.613		Minimum Optimal Solution =	3654.27		1	3905.8	98.31	127.078	0.0729	127.005		Minimum Optimal Solution =	3609.57
2	3654.27	91.98	76.1543	0.07065	76.0836		Mean of Optimal Solution =	3912.72		2	3928.55	98.88	127.106	0.0695	127.036		Mean of Optimal Solution =	3904.88
3	3927.37	98.85	78.4284	0.07309	78.3553		Median of Optimal Solution =	3912.72		3	3918.38	98.63	127.036	0.00047	127.035		Median of Optimal Solution =	3904.88
4	3939.93	99.17	80.5737	0.07386	80.4999		Solution Standrad Deviation =	58.0518		4	3879.22	97.64	126.966	0.07356	126.892		Solution Standrad Deviation =	73.7299
5	3939.34	99.15	59.9802	0.07542	59.9048		Average Price =	15.66		5	3785.34	95.28	127.059	0.07282	126.986		Average Price =	61.81
6	3940.44	99.18	76.5087	0.0714	76.4373		Relability =	7.5		6	3944.88	99.29	126.975	0.00062	126.975		Relability =	8.5
7	3927.52	98.85	70.7171	0.07039	70.6467		Normalized Price =	208.8		7	3843.25	96.73	127.058	0.07127	126.987		Normalized Price =	727.177
8	3939.41	99.15	81.5579	0.07303	81.4848		Average Solution Quality =	98.4826		8	3959.89	99.67	126.514	0.0741	126.439		Average Solution Quality =	98.2851
9	3825.47	96.29	75.1955	0.0705	75.125		Average FDC =	-77.5416		9	3649.31	91.85	127.102	0.06783	127.034		Average FDC =	-26.1119
10	3918.73	98.63	33.5597	0.07116	33.4885		Correlation Coefficent =	-1		10	3939.62	99.16	127.03	0.07546	126.954		Correlation Coefficent =	-1
11	3885.42	97.8	71.759	0.0409	71.7181		Solution Robustness =	67.4005		11	3803.96	95.74	127.05	0.07076	126.979		Solution Robustness =	52.9619
12	3852.04	96.96	65.7737	0.06988	65.7038		Performance Rate =	0.0047893		12	3848.22	96.86	127.102	0.07251	127.029		Performance Rate =	0.001537
13	3971.85	99.97	70.3553	0.07427	70.2811		Average Elapsed Time =	0.80733		13	3747.73	94.33	125.204	0.07241	125.132		Average Elapsed Time =	2.8801
14	3961.83	99.72	67.2571	0.06981	67.1873					14	3929.9	98.91	123.759	0.07252	123.687
15	3900.89	98.18	37.4746	0.07067	37.404					15	3938.74	99.14	127.106	0.00043	127.105
16	3928.03	98.87	76.1714	0.07414	76.0973					16	3803.96	95.74	127.012	0.07079	126.941
17	3918.73	98.63	52.8812	0.07078	52.8104					17	3856.17	97.06	127.04	0.06895	126.971
18	3859.73	97.15	71.1456	0.07059	71.075					18	3945.85	99.32	126.98	0.00086	126.979
19	3971.98	99.97	60.6533	0.07344	60.5799					19	3891.56	97.95	126.977	0.00078	126.976
20	3893.4	98	77.6285	0.07007	77.5584					20	3907.87	98.36	127.026	0.07077	126.955
21	3947.16	99.35	65.8985	0.0708	65.8277					21	3912.53	98.48	127.029	0.00038	127.029
22	3973.01	100	75.7331	0.07621	75.6569					22	3956.45	99.58	126.857	0.07068	126.786
23	3961.36	99.71	60.3961	0.06988	60.3263					23	3967.97	99.87	127.083	0.07055	127.013
24	3957.63	99.61	66.6845	0.07142	66.613					24	3959.57	99.66	127.005	0.00026	127.005
25	3948.76	99.39	66.6933	0.05205	66.6412					25	3876.85	97.58	127.088	0.06982	127.018
26	3967.84	99.87	53.6169	0.06691	53.55					26	3910.95	98.44	127.082	0.00017	127.082
27	3942.44	99.23	72.1662	0.0703	72.0958					27	3803.34	95.73	127.113	1e-05	127.113
28	3919.76	98.66	73.6295	0.06552	73.564					28	3951.02	99.45	126.96	0.00264	126.957
29	3939.93	99.17	71.9383	0.06803	71.8703					29	3959.1	99.65	126.999	0.00083	126.998
30	3912.24	98.47	71.8574	0.03792	71.8195					30	3943.03	99.25	127.054	0.07257	126.981
31	3972.5	99.99	72.7787	0.03448	72.7443					31	3930.62	98.93	127.097	0.07308	127.024
32	3921.31	98.7	70.373	0.07147	70.3015					32	3885.74	97.8	127.047	0.00286	127.044
33	3962.47	99.73	65.8675	0.06829	65.7993					33	3801.05	95.67	127.081	0.06893	127.013
34	3883.35	97.74	78.9364	0.0705	78.8659					34	3968.88	99.9	126.96	0.00053	126.96
35	3896.18	98.07	59.7206	0.07076	59.6499					35	3852.62	96.97	126.899	0.07059	126.828
36	3965.78	99.82	34.4751	0.06861	34.4064					36	3790.59	95.41	127.095	0.07044	127.024
37	3902.22	98.22	64.9672	0.06829	64.8989					37	3871.17	97.44	127.089	0.07132	127.017
38	3958.78	99.64	67.3702	0.01693	67.3533					38	3917.04	98.59	127.005	0.07621	126.929
39	3943.91	99.27	34.0134	0.01174	34.0017					39	3964.41	99.78	127.031	0.06986	126.961
40	3960.01	99.67	75.7729	0.071	75.7019					40	3860.32	97.16	126.698	0.07235	126.626
41	3868.07	97.36	57.5299	0.07263	57.4573					41	3928.03	98.87	127.089	0.07352	127.016
42	3864.09	97.26	74.8984	0.02307	74.8753					42	3922.21	98.72	127.106	0.07069	127.035
43	3968.36	99.88	61.3505	0.06974	61.2807					43	3960.53	99.69	126.984	0.06991	126.914
44	3924.84	98.79	62.3059	0.06782	62.2381					44	3910.57	98.43	126.993	0.07317	126.919
45	3941.48	99.21	72.7388	0.07257	72.6663					45	3963.09	99.75	126.932	0.06611	126.866
46	3952.33	99.48	73.3419	0.06788	73.274					46	3834.63	96.52	127.123	0.07229	127.051
47	3973.01	100	68.5831	0.05739	68.5257					47	3931.63	98.96	127.072	0.00085	127.071
48	3961.64	99.71	70.8394	0.07309	70.7663					48	3874.45	97.52	126.546	0.06974	126.476
49	3933.2	99	61.6154	0.073	61.5424					49	3921.32	98.7	127.039	0.06959	126.969
50	3812.04	95.95	77.0677	0.07024	76.9974					50	3938.39	99.13	127.026	0.07377	126.952
51	3960.09	99.67	59.9023	0.0693	59.833					51	3762.08	94.69	127.021	0.07372	126.947
52	3947.56	99.36	58.5005	0.07116	58.4294					52	3956.86	99.59	127.007	0.06797	126.939
53	3920.88	98.69	68.8296	0.07002	68.7596					53	3891.2	97.94	127.001	0.07339	126.928
54	3937.29	99.1	61.785	0.07473	61.7102					54	3965.7	99.82	126.992	0.07134	126.92
55	3902.19	98.22	63.8816	0.07174	63.8098					55	3869.55	97.4	127.063	0.07003	126.993
56	3823.8	96.24	52.1595	0.06573	52.0938					56	3873.93	97.51	127.115	0.07101	127.044
57	3940.03	99.17	53.4788	0.04731	53.4314					57	3971.85	99.97	127.019	0.07489	126.944
58	3949.75	99.41	72.9588	0.07287	72.886					58	3893.14	97.99	127.063	0.07684	126.986
59	3962.66	99.74	76.0879	0.0418	76.0461					59	3957.19	99.6	127.023	0.07135	126.951
60	3949.23	99.4	75.6104	0.07353	75.5368					60	3873.93	97.51	127.095	0.06846	127.027
61	3861.74	97.2	75.1005	0.0707	75.0298					61	3966.21	99.83	126.899	0.00059	126.899
62	3961.16	99.7	53.2452	0.07087	53.1743					62	3953.7	99.51	126.944	0.06987	126.874
63	3948.2	99.38	60.2299	0.06956	60.1603					63	3776.33	95.05	127.069	0.07334	126.996
64	3954.39	99.53	65.7557	0.0681	65.6876					64	3968.36	99.88	127.036	0.00163	127.034
65	3950.78	99.44	58.8175	0.06966	58.7478					65	3968.36	99.88	127.074	0.06879	127.005
66	3812.18	95.95	71.1195	0.06974	71.0498					66	3952.08	99.47	126.922	0.07266	126.849
67	3896.74	98.08	48.9987	0.06886	48.9298					67	3962.98	99.75	126.974	0.00099	126.973
68	3971.46	99.96	61.1754	0.03715	61.1383					68	3941.97	99.22	126.969	0.00022	126.969
69	3924.2	98.77	78.9034	0.00082	78.9026					69	3943.68	99.26	126.945	0.07042	126.875
70	3954.9	99.54	66.4085	0.05849	66.35					70	3840.15	96.66	127.008	0.0689	126.939
71	3943.55	99.26	66.6536	0.06975	66.5839					71	3871.52	97.45	127.106	1e-05	127.106
72	3893.17	97.99	62.1399	0.06513	62.0748					72	3821.11	96.18	127.083	0.07047	127.013
73	3965.26	99.8	61.9792	0.03927	61.9399					73	3893.46	98	126.974	0.07116	126.903
74	3891.33	97.94	63.1716	0.07207	63.0995					74	3965.26	99.8	126.953	0.07674	126.876
75	3694.87	93	66.0075	0.07092	65.9365					75	3959.13	99.65	127.013	0.06986	126.943
76	3951.34	99.45	67.9864	0.05513	67.9312					76	3735.13	94.01	126.999	0.07252	126.926
77	3837.72	96.59	75.3811	0.07375	75.3074					77	3669.02	92.35	127.068	0.06743	127.001
78	3905.08	98.29	71.5109	0.06906	71.4419					78	3935.27	99.05	127.092	0.00032	127.092
79	3837.53	96.59	69.4386	0.0687	69.3699					79	3609.57	90.85	127.078	0.06821	127.01
80	3921.61	98.71	64.1287	0.07339	64.0553					80	3956.33	99.58	127.022	0.0708	126.951
81	3964.62	99.79	70.0063	0.07205	69.9343					81	3965.26	99.8	126.83	0.07201	126.758
82	3937.86	99.12	72.7855	0.07767	72.7079					82	3892.96	97.99	126.7	0.07024	126.63
83	3744.67	94.25	73.2015	0.07171	73.1298					83	3835.1	96.53	126.969	0.07243	126.897
84	3958.89	99.64	73.9012	0.07111	73.8301					84	3954.69	99.54	126.907	0.0717	126.835
85	3964.74	99.79	72.392	0.05464	72.3374					85	3961.04	99.7	126.96	0.00086	126.96
86	3867.93	97.36	77.0764	0.07118	77.0052					86	3912.53	98.48	126.427	0.07567	126.351
87	3955.02	99.55	70.0475	0.07027	69.9772					87	3933.01	98.99	126.993	0.0745	126.918
88	3931.65	98.96	73.1901	0.0036	73.1865					88	3944.7	99.29	127.049	0.07179	126.977
89	3810.53	95.91	75.5355	0.0665	75.469					89	3957.16	99.6	127.026	0.00061	127.026
90	3879.46	97.65	74.9162	0.07362	74.8426					90	3662.2	92.18	127.07	0.0733	126.996
91	3846.9	96.83	73.3854	0.06997	73.3154					91	3918.72	98.63	127.056	0.06967	126.986
92	3953.28	99.5	67.1821	0.07053	67.1116					92	3880.47	97.67	127.11	0.06992	127.04
93	3896.42	98.07	69.6335	0.07073	69.5628					93	3954.69	99.54	127.005	0.07027	126.934
94	3896.61	98.08	68.9767	0.06862	68.9081					94	3970.09	99.93	127.052	0.00033	127.052
95	3883.57	97.75	74.8598	0.06704	74.7927					95	3965.26	99.8	127.054	0.07102	126.983
96	3892.82	97.98	72.4501	0.07311	72.377					96	3970.95	99.95	126.906	0.0734	126.833
97	3791.87	95.44	75.2728	0.06783	75.205					97	3784.83	95.26	127.108	0.07253	127.036
98	3765.29	94.77	74.5712	0.07174	74.4995					98	3949.23	99.4	126.877	0.07194	126.805
99	3933.52	99.01	64.8181	0.0704	64.7477					99	3954.72	99.54	127.073	0.07327	127
100	3959.05	99.65	71.2479	0.0222	71.2257					100	3949.41	99.41	126.928	0.00014	126.928
101	3804.39	95.76	68.4444	0.06849	68.3759					101	3900.93	98.19	126.939	0.00014	126.939
102	3970.41	99.93	71.1355	0.03357	71.1019					102	3939.93	99.17	127.006	0.07056	126.935
103	3964.59	99.79	68.6891	0.02136	68.6678					103	3933.89	99.02	126.978	0.00028	126.978
104	3927.37	98.85	71.1178	0.06826	71.0495					104	3856.82	97.08	127.09	0.07199	127.018
105	3931.31	98.95	76.2986	0.02218	76.2764					105	3697.46	93.06	127.075	0.06843	127.006
106	3934.24	99.02	76.9241	0.07456	76.8496					106	3972.67	99.99	127.066	0.00024	127.065
107	3959.57	99.66	74.0719	0.0704	74.0015					107	3839.74	96.65	127.066	0.07003	126.996
108	3923.35	98.75	70.9411	0.06836	70.8728					108	3831.36	96.43	127.079	0.07431	127.005
109	3924.11	98.77	74.0305	0.071	73.9595					109	3935.63	99.06	127.062	0.07179	126.99
110	3940.96	99.19	62.5222	0.07469	62.4475					110	3766.17	94.79	127.108	0.00017	127.108
111	3940.44	99.18	69.1125	0.07375	69.0387					111	3968.8	99.89	125.954	0.03106	125.922
112	3913.33	98.5	63.1291	0.0687	63.0604					112	3941.48	99.21	127.078	0.07376	127.004
113	3970.41	99.93	55.7989	0.06807	55.7308					113	3969.58	99.91	127.035	0.0727	126.962
114	3936.82	99.09	72.4187	0.06886	72.3498					114	3964.27	99.78	126.546	1e-05	126.546
115	3915.59	98.55	70.4906	0.07645	70.4141					115	3818.29	96.11	127.119	0.07231	127.047
116	3847.26	96.84	78.0426	0.07304	77.9696					116	3849.87	96.9	126.871	0.00057	126.87
117	3921.83	98.71	71.7305	0.06547	71.6651					117	3953.89	99.52	126.851	0.00026	126.851
118	3914.94	98.54	77.9123	0.07138	77.841					118	3930.08	98.92	127.071	0.06645	127.005
119	3870.36	97.42	51.385	0.06793	51.317					119	3955.44	99.56	127.062	0.07241	126.989
120	3969.12	99.9	76.5289	0.02222	76.5066					120	3886.65	97.83	127.053	0.07174	126.982
121	3965.26	99.8	77.7335	0.07043	77.6631					121	3928.55	98.88	127.074	0.07218	127.002
122	3835.61	96.54	75.9257	0.0723	75.8534					122	3928.03	98.87	126.998	0.07029	126.928
123	3788.63	95.36	70.3977	0.06978	70.3279					123	3742.49	94.2	127.094	0.06836	127.025
124	3945.85	99.32	57.1964	0.07497	57.1215					124	3845.47	96.79	127.07	0.06942	127.001
125	3904.19	98.27	77.375	0.07214	77.3029					125	3802.07	95.7	127.099	0.07091	127.028
126	3932.17	98.97	72.2021	0.07242	72.1297					126	3879.1	97.64	127.07	0.07188	126.998
127	3952.34	99.48	46.6339	0.0637	46.5702					127	3972.03	99.98	127.099	0.00144	127.097
128	3934.86	99.04	79.4915	0.0036	79.4879					128	3971.98	99.97	127.028	0.07137	126.957
129	3960.72	99.69	59.6156	0.01963	59.596					129	3970.41	99.93	126.971	9e-05	126.971
130	3961.16	99.7	73.479	0.072	73.407					130	3967.5	99.86	126.817	8e-05	126.817
131	3841.9	96.7	75.2063	0.07316	75.1332					131	3857.53	97.09	127.021	0.07006	126.951
132	3969.91	99.92	58.6592	0.06973	58.5894					132	3941	99.19	127.072	0.00038	127.072
133	3971.06	99.95	70.8891	0.05361	70.8355					133	3949.52	99.41	127.008	0.07458	126.933
134	3847.38	96.84	77.9292	0.07216	77.857					134	3922.86	98.74	127.01	0.0699	126.94
135	3669.65	92.36	74.899	0.07011	74.8289					135	3896.85	98.08	126.963	0.06862	126.894
136	3909.42	98.4	63.1733	0.07068	63.1027					136	3923.69	98.76	127.023	0.06977	126.953
137	3884.72	97.78	68.9222	0.07246	68.8497					137	3777.4	95.08	127.054	0.06807	126.986
138	3909.01	98.39	64.4728	0.07029	64.4026					138	3749.67	94.38	127.107	0.07081	127.037
139	3928.55	98.88	72.0318	0.02017	72.0116					139	3928.03	98.87	127.095	0.07324	127.022
140	3964.74	99.79	66.4452	0.05183	66.3933					140	3945.11	99.3	127.111	0.07309	127.038
141	3947.14	99.35	72.4935	0.07138	72.4221					141	3966.29	99.83	127.076	0.00014	127.076
142	3920.64	98.68	74.3349	0.07274	74.2622					142	3773.81	94.99	127.059	0.07093	126.988
143	3873.49	97.5	58.9833	0.07281	58.9105					143	3916.78	98.58	126.791	0.07054	126.72
144	3917.7	98.61	77.2316	0.07377	77.1578					144	3967.82	99.87	127.042	0.00084	127.041
145	3942.51	99.23	71.6249	0.0732	71.5517					145	3877.21	97.59	127.056	0.0711	126.985
146	3964.74	99.79	60.0017	0.07418	59.9276					146	3787.26	95.32	126.968	0.07344	126.894
147	3923.24	98.75	70.6381	0.0727	70.5654					147	3939.98	99.17	126.825	0.07031	126.755
148	3888.47	97.87	80.5998	0.07066	80.5292					148	3825.26	96.28	126.388	0.06773	126.321
149	3961.16	99.7	71.8075	0.07579	71.7317					149	3659.31	92.1	127.102	0.07072	127.031
150	3951.14	99.45	77.1897	0.0722	77.1175					150	3943.03	99.25	127.015	0.00082	127.014
151	3922.35	98.72	69.606	0.07122	69.5348					151	3933.89	99.02	127.07	0.00032	127.07
152	3925.45	98.8	72.4618	0.07023	72.3915					152	3946.13	99.32	127.084	0.07352	127.011
153	3843.77	96.75	72.4335	0.06889	72.3646					153	3942.41	99.23	126.59	0.07046	126.52
154	3761.29	94.67	67.6464	0.07156	67.5748					154	3960.72	99.69	126.844	0.00176	126.842
155	3863.14	97.23	82.1652	0.06775	82.0974					155	3964.22	99.78	127.039	0.00054	127.039
156	3875.03	97.53	62.2629	0.06809	62.1948					156	3891.37	97.95	126.013	0.06693	125.946
157	3807.78	95.84	73.5376	0.07188	73.4658					157	3901.18	98.19	127.085	0.0692	127.015
158	3934.76	99.04	69.3346	0.04135	69.2932					158	3925.97	98.82	126.943	0.07474	126.868
159	3931.14	98.95	68.958	0.07029	68.8877					159	3939.93	99.17	127.022	0.07338	126.948
160	3963.09	99.75	75.6014	0.0727	75.5287					160	3958.54	99.64	127.063	0.07248	126.991
161	3921.61	98.71	68.6668	0.06234	68.6045					161	3963.77	99.77	126.986	0.07411	126.912
162	3969.26	99.91	68.9632	0.07054	68.8927					162	3945.1	99.3	127.113	0.07049	127.042
163	3877.77	97.6	67.0036	0.07156	66.932					163	3969.26	99.91	127.028	0.07152	126.956
164	3968.15	99.88	53.2233	0.0295	53.1938					164	3933.2	99	126.967	0.07272	126.894
165	3948.72	99.39	68.3396	0.07239	68.2672					165	3952.96	99.5	127.001	0.00069	127.001
166	3972.35	99.98	70.2322	0.07458	70.1577					166	3934.75	99.04	125.679	0.07123	125.608
167	3896.5	98.07	78.7208	0.07035	78.6504					167	3919.49	98.65	127.072	0.07145	127
168	3955.95	99.57	79.1911	0.07544	79.1156					168	3819.47	96.14	127.127	0.07333	127.054
169	3961.68	99.71	62.097	0.03059	62.0664					169	3972.67	99.99	126.927	0.0001	126.927
170	3920.74	98.68	66.2224	0.07234	66.1501					170	3943.41	99.25	127.018	0.06629	126.952
171	3968.8	99.89	73.4515	0.02044	73.431					171	3971.52	99.96	126.862	0.06907	126.792
172	3831.86	96.45	39.0686	0.06716	39.0014					172	3848.26	96.86	123.696	0.07118	123.625
173	3923.9	98.76	77.0146	0.07189	76.9428					173	3971.98	99.97	126.958	0.00243	126.956
174	3947.16	99.35	68.9655	0.0184	68.9471					174	3970.73	99.94	126.548	0.00014	126.548
175	3931.63	98.96	69.8321	0.06724	69.7649					175	3960.09	99.67	127.083	0.00117	127.082
176	3892.88	97.98	76.4325	0.0695	76.363					176	3961.68	99.71	126.856	0.00038	126.856
177	3886.17	97.81	71.3406	0.07019	71.2704					177	3970.95	99.95	127.029	0.00046	127.028
178	3969.76	99.92	56.0865	0.07272	56.0138					178	3955.66	99.56	126.72	0.07255	126.648
179	3961.36	99.71	65.1624	0.00074	65.1617					179	3924.21	98.77	127.096	0.06927	127.027
180	3972.67	99.99	71.2591	0.0419	71.2172					180	3970.95	99.95	127.014	0.0684	126.945
181	3922.67	98.73	50.6277	0.07212	50.5556					181	3968.47	99.89	127.041	0.00044	127.04
182	3888.74	97.88	67.3312	0.07224	67.259					182	3944.06	99.27	127.114	0.00041	127.114
183	3836.29	96.56	80.2476	0.07328	80.1744					183	3952.31	99.48	127.094	0.0001	127.094
184	3885.09	97.79	74.4415	0.01938	74.4221					184	3970.41	99.93	127.012	0.01437	126.998
185	3941.65	99.21	71.2601	0.02283	71.2373					185	3956.63	99.59	127.024	0.06922	126.954
186	3955.44	99.56	67.4947	0.07206	67.4227					186	3952.33	99.48	127.128	0.00034	127.128
187	3883.57	97.75	73.5807	0.07355	73.5071					187	3955.44	99.56	127.007	0.06503	126.942
188	3890.67	97.93	75.5514	0.06907	75.4823					188	3865.48	97.29	127.086	0.07057	127.016
189	3714.92	93.5	74.6109	0.07358	74.5373					189	3958.54	99.64	126.972	0.00015	126.972
190	3874.27	97.51	76.5097	0.07075	76.439					190	3967.84	99.87	127.071	0.00018	127.071
191	3935.95	99.07	69.3501	0.07188	69.2782					191	3971.98	99.97	126.772	0.07417	126.698
192	3956.31	99.58	62.7133	0.0722	62.6411					192	3914.84	98.54	127.103	0.0753	127.028
193	3895.72	98.05	77.2748	0.07129	77.2035					193	3782.74	95.21	126.918	0.06912	126.849
194	3950.47	99.43	40.0772	0.06563	40.0116					194	3956.63	99.59	127.026	0.0699	126.956
195	3816.27	96.05	76.1729	0.07222	76.1007					195	3928.03	98.87	127.032	0.0778	126.954
196	3927.52	98.85	70.8067	0.07269	70.734					196	3942.18	99.22	127.011	0.0726	126.938
197	3919.7	98.66	76.0013	0.06963	75.9316					197	3801.89	95.69	127.071	0.07312	126.998
198	3862.63	97.22	61.5009	0.07051	61.4304					198	3903.3	98.25	127.101	0.07131	127.03
199	3914.59	98.53	73.9638	0.07903	73.8848					199	3943.03	99.25	127.006	0.07399	126.932
200	3914.45	98.53	62.0559	0.06756	61.9883					200	3927.37	98.85	126.973	0.0703	126.902

[truncated: 1 more sheets: 10_RBACO_Seeds(25)]
