# Supplementary material for: Enhanced Hyper-Cube Framework Aco for Combinatorial Optimization Problems
Source: Preprints.org preprint supplement (doi:10.20944/preprints202108.0573.v1), 2021-08-31
Supplement: Supplementary file 2 [file 01_ACOA_@_Seeds(75)_Exp (1).xlsx]

## Sheet: 01_ACOA_@_Seeds(75)_Fast
Slow Convergence										Slow Convergenece
ige	Fbest(ige)	Fworst(ige)	Fmean(ige)	BWLocalDis	GlobalDis	Segma	MaxTau	MinTau		Expeirement no.(Iexp) =	175
1	3524.74	1899.41	2773.08	10	8	1	0.0198	0.0198		Seeds =	75
2	3913.23	2575.32	3162.33	10	3	1	0.0375	0.023		Number of variables =	16
3	3913.23	2770.54	3438.16	8	3	1	0.055	0.0419		no. of Ants =	25
4	3959.1	2623.72	3632.75	6	2	1	0.0694	0.0377		Maximum CBLF(fopt) =	3973.01
5	3971.06	3274.73	3665.54	4	1	1	0.0872	0.034		Optimal Solution(xopt) =	3233323333233333
6	3971.06	3022.1	3722.64	3	1	1	0.1013	0.0306		Number of Practical Optima =	1
7	3971.06	3339.02	3804.34	2	1	2	0.1416	0.0275		no. of Iterations(ige) =	18
8	3973.01	3612.72	3898.7	4	0	1	0.1547	0.0248		1st Global optima Found @ ige =	8
9	3973.01	3700.99	3903.7	3	0	5	0.279	0.0223		Minimum Best Solution =	3524.74
10	3973.01	3584.27	3921.64	3	0	10	0.5217	0.0201		Mean of Best Solution =	3940.37
11	3973.01	3796.55	3963.53	1	0	18	0.9856	0.018		SD of Best Solution =	105.473
12	3973.01	3801.89	3961.26	1	0	19	1.4325	0.0162		Fitness Distance Correlation =	-186.573
13	3973.01	3971.06	3972.78	1	0	22	1.9489	0.0146		Correlation Coefficent =	-0.87838
14	3973.01	3821.76	3966.34	1	0	21	2.36	0.0132		Elapsed Time =	2.4664
15	3973.01	3925.97	3971.13	1	0	24	2.8355	0.0118
16	3973.01	3903.19	3970.14	1	0	23	3.2298	0.0107
17	3973.01	3973.01	3973.01	0	0	25	3.6568	0.0096
18	3973.01	3646.79	3959.97	1	0	24	3.952	0.0086

## Sheet: 01_ACOA_@_Seeds(75)_Slow
Slow Convergence										Slow Convergenece
ige	Fbest(ige)	Fworst(ige)	Fmean(ige)	BWLocalDis	GlobalDis	Segma	MaxTau	MinTau		Expeirement no.(Iexp) =	19
1	3540.76	2003.84	2764.26	12	5	1	0.0206	0.0206		Seeds =	75
2	3914.18	2421.41	3315.26	8	5	1	0.0371	0.0185		Number of variables =	16
3	3935.01	2793.27	3548.7	7	4	1	0.0547	0.0242		no. of Ants =	25
4	3954.72	3036.82	3615.08	5	3	1	0.0722	0.0448		Maximum CBLF(fopt) =	3973.01
5	3955.22	2560.97	3667.69	5	2	1	0.0844	0.0403		Optimal Solution(xopt) =	233332333333333
6	3955.22	3569.95	3834.74	6	2	3	0.1572	0.0363		Number of Practical Optima =	1
7	3961.36	3335.84	3837.49	3	1	1	0.1668	0.0327		no. of Iterations(ige) =	65
8	3964.92	3387.84	3877.95	4	2	1	0.1757	0.0294		1st Global optima Found @ ige =	9
9	3973.01	3626.79	3904.13	3	0	1	0.1855	0.0265		Minimum Best Solution =	3540.76
10	3973.01	3445.17	3839.93	2	0	1	0.193	0.0238		Mean of Best Solution =	3963.74
11	3973.01	3600.26	3936.78	1	0	5	0.3096	0.0214		SD of Best Solution =	54.1025
12	3973.01	3763.26	3938.08	2	0	8	0.506	0.0193		Fitness Distance Correlation =	-39.0592
13	3973.01	3941.65	3968.62	2	0	15	0.9018	0.0174		Correlation Coefficent =	-0.64924
14	3973.01	3961.36	3971.36	1	0	20	1.4099	0.0156		Elapsed Time =	2.4664
15	3973.01	3967.18	3972.08	1	0	21	1.898	0.0141
16	3973.01	3961.36	3972.08	1	0	23	2.3962	0.0127
17	3973.01	3961.36	3971.38	1	0	21	2.7847	0.0114
18	3973.01	3961.36	3971.61	1	0	21	3.1344	0.0103
19	3973.01	3961.36	3972.55	1	0	24	3.5388	0.0092
20	3973.01	3973.01	3973.01	0	0	25	3.9349	0.0083
21	3973.01	3967.18	3972.78	1	0	24	4.2604	0.0075
22	3973.01	3973.01	3973.01	0	0	25	4.5844	0.0067
23	3973.01	3973.01	3973.01	0	0	25	4.8759	0.0061
24	3973.01	3973.01	3973.01	0	0	25	5.1383	0.0054
25	3973.01	3973.01	3973.01	0	0	25	5.3745	0.0049
26	3973.01	3973.01	3973.01	0	0	25	5.587	0.0044
27	3973.01	3967.18	3972.78	1	0	24	5.7473	0.004
28	3973.01	3973.01	3973.01	0	0	25	5.9226	0.0036
29	3973.01	3973.01	3973.01	0	0	25	6.0803	0.0032
30	3973.01	3973.01	3973.01	0	0	25	6.2223	0.0029
31	3973.01	3973.01	3973.01	0	0	25	6.35	0.0026
32	3973.01	3973.01	3973.01	0	0	25	6.465	0.0023
33	3973.01	3967.18	3972.78	1	0	24	6.5375	0.0021
34	3973.01	3973.01	3973.01	0	0	25	6.6337	0.0019
35	3973.01	3973.01	3973.01	0	0	25	6.7204	0.0017
36	3973.01	3973.01	3973.01	0	0	25	6.7983	0.0015
37	3973.01	3973.01	3973.01	0	0	25	6.8685	0.0014
38	3973.01	3973.01	3973.01	0	0	25	6.9316	0.0012
39	3973.01	3973.01	3973.01	0	0	25	6.9885	0.0011
40	3973.01	3973.01	3973.01	0	0	25	7.0396	0.001
41	3973.01	3973.01	3973.01	0	0	25	7.0857	0.0009
42	3973.01	3973.01	3973.01	0	0	25	7.1271	0.0008
43	3973.01	3973.01	3973.01	0	0	25	7.1644	0.0007
44	3973.01	3973.01	3973.01	0	0	25	7.198	0.0007
45	3973.01	3973.01	3973.01	0	0	25	7.2282	0.0006
46	3973.01	3973.01	3973.01	0	0	25	7.2553	0.0005
47	3973.01	3973.01	3973.01	0	0	25	7.2798	0.0005
48	3973.01	3967.18	3972.78	1	0	24	7.2708	0.0004
49	3973.01	3973.01	3973.01	0	0	25	7.2937	0.0004
50	3973.01	3973.01	3973.01	0	0	25	7.3143	0.0004
51	3973.01	3973.01	3973.01	0	0	25	7.3329	0.0003
52	3973.01	3973.01	3973.01	0	0	25	7.3496	0.0003
53	3973.01	3973.01	3973.01	0	0	25	7.3646	0.0003
54	3973.01	3973.01	3973.01	0	0	25	7.3782	0.0002
55	3973.01	3973.01	3973.01	0	0	25	7.3904	0.0002
56	3973.01	3973.01	3973.01	0	0	25	7.4013	0.0002
57	3973.01	3973.01	3973.01	0	0	25	7.4112	0.0002
58	3973.01	3973.01	3973.01	0	0	25	7.4201	0.0002
59	3973.01	3973.01	3973.01	0	0	25	7.4281	0.0001
60	3973.01	3973.01	3973.01	0	0	25	7.4353	0.0001
61	3973.01	3973.01	3973.01	0	0	25	7.4417	0.0001
62	3973.01	3973.01	3973.01	0	0	25	7.4476	0.0001
63	3973.01	3973.01	3973.01	0	0	25	7.4528	0.0001
64	3973.01	3973.01	3973.01	0	0	25	7.4575	0.0001
65	3973.01	3973.01	3973.01	0	0	25	7.4618	0.0001
