# Supplementary material for: Enhanced Hyper-Cube Framework Aco for Combinatorial Optimization Problems
Source: Preprints.org preprint supplement (doi:10.20944/preprints202108.0573.v1), 2021-08-31
Supplement: Supplementary file 3 [file 01_ACOA_Seeds_Results.xlsx]

## Sheet: 00_Index
		Global optimal solution		Relaibility (%)		Normalized Price (iteration)		Correlation Coefficent		Performance rate		Elapsed time (Sec)		Solution Quality
		Fast convergence	Slow Convergence	Fast convergence	Slow Convergence	Fast convergence	Slow Convergence	Fast convergence	Slow Convergence	Fast convergence	Slow Convergence	Fast convergence	Slow Convergence	Fast convergence	Slow Convergence
	Seed (301)	3973.01	3973.01	38.5	30	50.3117	220.083	-0.79002	-0.84521	0.019876	0.0045437	0.88562	2.9829	99.7152	99.6372
	Seed (2)	3973.01	3973.01	39	37.5	48.5641	174.347	-0.79948	-0.847	0.020591	0.0057357	0.86266	2.9453	99.7366	99.7035
	Seed (50)	3973.01	3973.01	42.5	37.5	44.8471	155.612	-0.8015	-0.83511	0.022298	0.0064262	0.86622	2.9904	99.6404	99.7302
	Seed (75)	3973.01	3973.01	45	37.5	42.2	175.253	-0.79592	-0.84236	0.023697	0.005706	0.86277	2.9714	99.7658	99.6515
	Seed (111)	3973.01	3973	36	36.5	52.9167	180.657	-0.79737	-0.83492	0.018898	0.0055353	0.86662	2.9733	99.669	99.64
	Seed (200)	3973.01	3973.01	34	30	57.0588	218.65	-0.79061	-0.85498	0.017526	0.0045735	0.88339	2.9791	99.6607	99.6898
	Seed (167)	3973.01	3973.01	19.6	36	48.3951	182.917	-0.79713	-0.83099	0.018177	0.005467	0.90517	3.0424	99.7412	99.7355
	Seed (225)	3973.01	3973.01	34.5	45	55.0145	147.667	-0.79411	-0.83298	0.01901	0.006772	0.86787	3.0232	99.6401	99.7121
	Seed (11)	3973.01	3973.01	36.5	35.5	52.6027	187.704	-0.79411	-0.83997	0.01901	0.0053275	0.87814	3.0413	99.6998	99.712
	Seed (25)	3973.01	3973.01	31.5	39	59.7778	168.359	-0.80081	-0.83503	0.016729	0.0059397	0.86068	2.9773	99.6154	99.6427
			Fast Convergence						Slow Convergence
			Relaibility (%)	Normalized Price (iteration)	Correlation Coefficent	Performance Rate	Elapsed time (sec)		Relaibility (%)	Normalized Price (iteration)	Correlation Coefficent	Performance Rate	Elapsed time (sec)
		Min.	19.6	42.2	-0.8015	0.016729	0.86068	Min.	30	147.667	-0.85498	0.0045437	2.9453
		Max.	45	59.7778	-0.79002	0.023697	0.90517	Max.	45	220.083	-0.83099	0.006772	3.0424
		Mean	35.71	51.1689	-0.796106	0.0195812	0.873914	Mean	36.45	181.125	-0.839855	0.00560266	2.99266
		Median	36.25	51.4572	-0.796525	0.01901	0.867245	Median	37	177.955	-0.83754	0.00562065	2.981
		Standrad division	6.58308	5.14124	0.00374835	0.00202182	0.0134035	Standrad division	4.08932	22.3302	0.00714692	0.000668339	0.0305983
			Solution Quality
			Fast Conv.	Slow Conv.
		Min.	99.6154	99.6372
		Max.	99.7658	99.7355
		Mean	99.6884	99.6855
		Median	99.6844	99.6967
		Standrad division	0.0480204	0.0369342

## Sheet: 01_ACOA_Seeds(301)
Fast Converegnce Exp							Fast Converegnce Exp			Slow Converegnce Exp							Slow Converegnce Exp
#	CBLF	Quality	Taumax	Taumin	DeltaTauminmax		Global Optimal Solution =	3973.01		#	CBLF	Quality	Taumax	Taumin	DeltaTauminmax		Global Optimal Solution =	3973.01
1	3961.04	99.7	3.67678	0.01959	3.65719		Minimum Optimal Solution =	3771.9		1	3961.04	99.7	7.45354	0.00022	7.45332		Minimum Optimal Solution =	3856.17
2	3968.36	99.88	3.91022	0.02074	3.88948		Mean of Optimal Solution =	3961.69		2	3951.16	99.45	7.46842	0.01958	7.44884		Mean of Optimal Solution =	3958.59
3	3973	100	3.12352	0.0084	3.11512		Median of Optimal Solution =	3961.69		3	3960.01	99.67	7.4677	0.01921	7.44849		Median of Optimal Solution =	3958.59
4	3971.46	99.96	3.14408	0.00348	3.1406		Solution Standrad Deviation =	18.2217		4	3944.06	99.27	7.4621	0.00087	7.46123		Solution Standrad Deviation =	18.8616
5	3953.37	99.51	3.14857	0.01948	3.12909		Average Price =	19.37		5	3970.09	99.93	7.46466	0.00031	7.46435		Average Price =	66.025
6	3949.75	99.41	3.90564	0.01962	3.88602		Relability =	38.5		6	3966.86	99.85	7.46425	8e-05	7.46417		Relability =	30
7	3927.52	98.85	3.36708	0.01765	3.34943		Normalized Price =	50.3117		7	3954.72	99.54	7.46732	0.01909	7.44823		Normalized Price =	220.083
8	3972.35	99.98	3.67029	0.01652	3.65377		Average Solution Quality =	99.7152		8	3941.48	99.21	7.46829	0.00023	7.46806		Average Solution Quality =	99.6372
9	3967.2	99.85	3.55117	0.01884	3.53233		Average FDC =	-131.922		9	3965.26	99.8	7.41447	0.00207	7.4124		Average FDC =	-45.5172
10	3972.5	99.99	3.06946	0.01226	3.0572		Correlation Coefficent =	-0.79002		10	3955.55	99.56	7.46154	0.00058	7.46096		Correlation Coefficent =	-0.84521
11	3970.41	99.93	3.13049	0.0178	3.11269		Solution Robustness =	217.416		11	3973	100	7.44825	0.00025	7.448		Solution Robustness =	209.875
12	3958.45	99.63	3.72369	0.02164	3.70205		Performance Rate =	0.019876		12	3928.67	98.88	7.46162	0.01754	7.44408		Performance Rate =	0.0045437
13	3966.86	99.85	3.56115	0.01499	3.54616		Average Elapsed Time =	0.88562		13	3966.56	99.84	7.46848	0.02043	7.44805		Average Elapsed Time =	2.9829
14	3957.95	99.62	2.93815	0.01328	2.92487					14	3972.35	99.98	7.43919	6e-05	7.43913
15	3972.35	99.98	3.82845	0.00732	3.82113					15	3964.92	99.8	7.47036	2e-05	7.47034
16	3972.35	99.98	3.38464	0.01389	3.37075					16	3957.48	99.61	7.45902	8e-05	7.45894
17	3966.86	99.85	4.16673	0.01917	4.14756					17	3957.48	99.61	7.45674	0.00025	7.45649
18	3943.38	99.25	1.10609	0.02027	1.08582					18	3968.82	99.89	7.41442	0.01825	7.39617
19	3973	100	3.56715	0.02149	3.54566					19	3973	100	7.46336	5e-05	7.46331
20	3972.67	99.99	3.42767	0.01347	3.4142					20	3940.96	99.19	7.46426	0.01838	7.44588
21	3972.03	99.98	1.96902	0.01866	1.95036					21	3972.67	99.99	7.43447	0.00235	7.43212
22	3940.44	99.18	3.78986	0.01636	3.7735					22	3950.78	99.44	7.36029	0.01793	7.34236
23	3962.98	99.75	3.12784	0.01825	3.10959					23	3969.12	99.9	7.46201	0.00014	7.46187
24	3959.1	99.65	3.25094	0.01113	3.23981					24	3970.95	99.95	7.45394	0.0001	7.45384
25	3971.46	99.96	3.29787	0.018	3.27987					25	3971.98	99.97	7.45969	0.00187	7.45782
26	3962.98	99.75	3.41935	0.01643	3.40292					26	3972.35	99.98	7.46204	0.00036	7.46168
27	3969.76	99.92	4.22972	0.00864	4.22108					27	3971.98	99.97	7.43656	0.0013	7.43526
28	3961.16	99.7	2.87788	0.01583	2.86205					28	3972.35	99.98	7.4652	0.00022	7.46498
29	3972.35	99.98	3.039	0.00292	3.03608					29	3959.57	99.66	7.44326	0.02055	7.42271
30	3960.61	99.69	4.54617	0.01489	4.53128					30	3969.76	99.92	7.46189	9e-05	7.4618
31	3969.39	99.91	3.17474	0.01826	3.15648					31	3972.03	99.98	7.46513	0.00026	7.46487
32	3964.59	99.79	3.59324	0.00402	3.58922					32	3971.46	99.96	7.44178	0.00011	7.44167
33	3973	100	3.09595	0.01423	3.08172					33	3964.62	99.79	7.44686	0.02093	7.42593
34	3928.38	98.88	3.82427	0.0185	3.80577					34	3949.75	99.41	7.36081	0.02258	7.33823
35	3953.37	99.51	2.91907	0.01851	2.90056					35	3964.94	99.8	7.46329	0.01903	7.44426
36	3970.09	99.93	3.51393	0.01803	3.4959					36	3959.13	99.65	7.45802	0.02004	7.43798
37	3945.97	99.32	3.70631	0.0183	3.68801					37	3964.74	99.79	7.45345	0.00056	7.45289
38	3967.18	99.85	3.46106	0.00421	3.45685					38	3966.68	99.84	7.46431	0.01602	7.44829
39	3972.35	99.98	3.6138	0.0116	3.6022					39	3968.36	99.88	7.43995	0.01915	7.4208
40	3968.82	99.89	3.18798	0.01782	3.17016					40	3959.57	99.66	7.46906	0.00059	7.46847
41	3966.56	99.84	3.71446	0.02151	3.69295					41	3961.64	99.71	7.43689	0.01969	7.4172
42	3954.9	99.54	3.70339	0.0178	3.68559					42	3912.01	98.46	7.46763	0.022	7.44563
43	3959.57	99.66	4.07894	0.01784	4.0611					43	3953.37	99.51	7.46136	0.00021	7.46115
44	3971.98	99.97	3.21797	0.0177	3.20027					44	3960.39	99.68	7.4662	0.00065	7.46555
45	3967.18	99.85	2.92495	0.00281	2.92214					45	3973.01	100	7.41849	0.0001	7.41839
46	3961.04	99.7	3.4025	0.014	3.3885					46	3968.88	99.9	7.34239	0.01877	7.32362
47	3966.86	99.85	3.49933	0.01911	3.48022					47	3935.46	99.05	7.46052	0.01964	7.44088
48	3926.78	98.84	1.98105	0.0196	1.96145					48	3876.34	97.57	7.47205	0.02021	7.45184
49	3972.67	99.99	3.75269	0.01698	3.73571					49	3968.8	99.89	7.46575	0.00023	7.46552
50	3962.66	99.74	3.85469	0.01645	3.83824					50	3966.53	99.84	7.45809	0.00014	7.45795
51	3968.36	99.88	2.43516	0.02	2.41516					51	3968.36	99.88	7.4661	0.00018	7.46592
52	3972.17	99.98	4.31466	0.01512	4.29954					52	3956.47	99.58	7.46087	0.00011	7.46076
53	3972.5	99.99	1.93416	0.01724	1.91692					53	3956.68	99.59	7.45138	0.01871	7.43267
54	3924.42	98.78	3.80587	0.0131	3.79277					54	3958.54	99.64	7.46928	0.0181	7.45118
55	3937.77	99.11	3.60933	0.02055	3.58878					55	3963.19	99.75	7.46416	0.02179	7.44237
56	3968.82	99.89	3.80744	0.01684	3.7906					56	3948.76	99.39	7.38448	3e-05	7.38445
57	3972.35	99.98	3.45013	0.01842	3.43171					57	3962.01	99.72	7.45213	0.0001	7.45203
58	3973.01	100	3.52482	0.00792	3.5169					58	3953.37	99.51	7.46137	0.02265	7.43872
59	3967.18	99.85	3.34025	0.01514	3.32511					59	3968.36	99.88	7.45583	0.01821	7.43762
60	3953.61	99.51	1.60119	0.0179	1.58329					60	3970.41	99.93	7.46707	0.00109	7.46598
61	3936.82	99.09	3.77554	0.02191	3.75363					61	3926.78	98.84	7.46553	0.00012	7.46541
62	3960.72	99.69	3.74557	0.01598	3.72959					62	3856.17	97.06	7.47175	0.02095	7.4508
63	3964.09	99.78	3.16494	0.01856	3.14638					63	3963.33	99.76	7.45684	0.01837	7.43847
64	3972.35	99.98	3.81845	0.00506	3.81339					64	3962.33	99.73	7.4509	0.00022	7.45068
65	3953.37	99.51	3.68514	0.01839	3.66675					65	3970.41	99.93	7.46265	0.0002	7.46245
66	3967.5	99.86	3.61259	0.01911	3.59348					66	3961.04	99.7	7.47082	8e-05	7.47074
67	3969.58	99.91	3.69929	0.02172	3.67757					67	3963.71	99.77	7.36025	3e-05	7.36022
68	3968.82	99.89	3.57421	0.01918	3.55503					68	3959.13	99.65	7.40554	0.01993	7.38561
69	3970.41	99.93	4.11661	0.0095	4.10711					69	3972.67	99.99	7.46679	4e-05	7.46675
70	3972.03	99.98	2.74958	0.01879	2.73079					70	3972.35	99.98	7.4576	0.00012	7.45748
71	3961.64	99.71	3.20679	0.01672	3.19007					71	3972.35	99.98	7.46774	0.00041	7.46733
72	3967.18	99.85	3.92708	0.01646	3.91062					72	3907.36	98.35	7.4639	0.01488	7.44902
73	3970.73	99.94	3.98195	0.01978	3.96217					73	3956.84	99.59	7.46838	8e-05	7.4683
74	3959.57	99.66	3.80328	0.01884	3.78444					74	3941.48	99.21	7.46469	0.01716	7.44753
75	3972.67	99.99	2.23202	0.02029	2.21173					75	3956.95	99.6	7.45432	0.01591	7.43841
76	3967.84	99.87	3.90287	0.01901	3.88386					76	3963.71	99.77	7.47129	0.00035	7.47094
77	3971.06	99.95	3.28232	0.01752	3.2648					77	3969.47	99.91	7.45888	0.01723	7.44165
78	3972.03	99.98	3.52332	0.0239	3.49942					78	3968.36	99.88	7.38902	3e-05	7.38899
79	3968.8	99.89	3.58875	0.02065	3.5681					79	3968.47	99.89	7.4566	0.00068	7.45592
80	3972.67	99.99	2.70441	0.01417	2.69024					80	3968.5	99.89	7.45529	0.01582	7.43947
81	3970.41	99.93	3.74461	0.01858	3.72603					81	3972.03	99.98	7.4706	0.0005	7.4701
82	3959.57	99.66	3.02334	0.02157	3.00177					82	3967.33	99.86	7.45598	0.0171	7.43888
83	3972.03	99.98	2.89349	0.01389	2.8796					83	3940.44	99.18	7.46775	0.01514	7.45261
84	3925.49	98.8	4.12122	0.01651	4.10471					84	3967.18	99.85	7.45983	0.00028	7.45955
85	3946.85	99.34	3.78387	0.01802	3.76585					85	3964.74	99.79	7.45949	0.00055	7.45894
86	3971.46	99.96	4.0665	0.01884	4.04766					86	3972.03	99.98	7.46858	0.00019	7.46839
87	3950.81	99.44	3.6419	0.0178	3.6241					87	3964.92	99.8	7.43495	0.00112	7.43383
88	3964.74	99.79	4.0015	0.01116	3.99034					88	3970.41	99.93	7.46181	0.0001	7.46171
89	3955.95	99.57	3.57617	0.01912	3.55705					89	3921.83	98.71	7.46634	0.02093	7.44541
90	3962.16	99.73	3.1919	0.01858	3.17332					90	3964.09	99.78	7.46751	0.022	7.44551
91	3971.98	99.97	2.73424	0.00928	2.72496					91	3969.44	99.91	7.46805	1e-05	7.46804
92	3953.28	99.5	2.86726	0.00756	2.8597					92	3951.82	99.47	7.45646	0.0224	7.43406
93	3963.62	99.76	2.78762	0.01783	2.76979					93	3962.16	99.73	7.46116	0.0002	7.46096
94	3968.36	99.88	3.48886	0.01955	3.46931					94	3973.01	100	7.45034	4e-05	7.4503
95	3972.17	99.98	2.65381	0.02101	2.6328					95	3969.39	99.91	7.46226	4e-05	7.46222
96	3968.15	99.88	3.95861	0.00243	3.95618					96	3955.44	99.56	7.35767	0.01149	7.34618
97	3943.03	99.25	3.37233	0.01762	3.35471					97	3951.02	99.45	7.46381	0.00018	7.46363
98	3968.8	99.89	3.5548	0.01284	3.54196					98	3949.73	99.41	7.46071	8e-05	7.46063
99	3971.98	99.97	3.46822	0.02091	3.44731					99	3958.45	99.63	7.47095	0.00014	7.47081
100	3968.36	99.88	3.82954	0.0201	3.80944					100	3971.52	99.96	7.45929	0.02273	7.43656
101	3963.19	99.75	3.62082	0.00778	3.61304					101	3959.05	99.65	7.40496	0.00378	7.40118
102	3962.33	99.73	3.79863	0.02184	3.77679					102	3962.16	99.73	7.46733	0.02037	7.44696
103	3951.67	99.46	3.55922	0.01765	3.54157					103	3971.98	99.97	7.46166	5e-05	7.46161
104	3963.19	99.75	3.90388	0.02212	3.88176					104	3964.22	99.78	7.46186	0.01513	7.44673
105	3961.68	99.71	3.63637	0.02005	3.61632					105	3967.32	99.86	7.45495	0.02175	7.4332
106	3950.27	99.43	3.77897	0.01926	3.75971					106	3939.34	99.15	7.47191	0.02158	7.45033
107	3950.81	99.44	3.03164	0.01679	3.01485					107	3971.98	99.97	7.46078	0.00022	7.46056
108	3953.61	99.51	2.74997	0.01977	2.7302					108	3959.05	99.65	7.41589	0.00016	7.41573
109	3970.09	99.93	4.00673	0.01854	3.98819					109	3966.86	99.85	7.45443	0.00022	7.45421
110	3922.53	98.73	3.61054	0.018	3.59254					110	3972.67	99.99	7.45703	9e-05	7.45694
111	3968.88	99.9	3.21548	0.00966	3.20582					111	3965.24	99.8	7.47191	0.00036	7.47155
112	3956.99	99.6	2.94879	0.01375	2.93504					112	3964.62	99.79	7.47051	0.02037	7.45014
113	3969.44	99.91	3.9053	0.0139	3.8914					113	3906.07	98.32	7.45606	0.01981	7.43625
114	3971.52	99.96	3.57089	0.01712	3.55377					114	3945.61	99.31	7.43507	0.0011	7.43397
115	3972.35	99.98	3.20131	0.00646	3.19485					115	3962.66	99.74	7.46885	8e-05	7.46877
116	3971.06	99.95	3.91743	0.00438	3.91305					116	3964.92	99.8	7.46964	0.00011	7.46953
117	3771.9	94.94	3.99659	0.01796	3.97863					117	3964.74	99.79	7.47097	0.00019	7.47078
118	3970.09	99.93	3.72614	0.01607	3.71007					118	3972.5	99.99	7.3305	0	7.3305
119	3944.56	99.28	2.51868	0.02195	2.49673					119	3966.86	99.85	7.46437	0.00127	7.4631
120	3967.33	99.86	3.49167	0.0187	3.47297					120	3953.37	99.51	7.4673	0.02148	7.44582
121	3958.27	99.63	2.8535	0.01698	2.83652					121	3968.47	99.89	7.45397	0.00076	7.45321
122	3968.15	99.88	3.61211	0.01808	3.59403					122	3968.88	99.9	7.46907	0.00029	7.46878
123	3969.39	99.91	3.42641	0.01785	3.40856					123	3946.13	99.32	7.46532	0.02314	7.44218
124	3971.98	99.97	3.38141	0.00768	3.37373					124	3966.53	99.84	7.46779	6e-05	7.46773
125	3968.36	99.88	3.25071	0.01998	3.23073					125	3935.77	99.06	7.46661	0.01889	7.44772
126	3967.5	99.86	2.96651	0.01743	2.94908					126	3973.01	100	7.45034	0.00015	7.45019
127	3969.14	99.9	3.60375	0.02149	3.58226					127	3959.05	99.65	7.36918	0.01994	7.34924
128	3935.78	99.06	4.36108	0.02051	4.34057					128	3968.88	99.9	7.46862	8e-05	7.46854
129	3966.88	99.85	4.11518	0.01711	4.09807					129	3972.67	99.99	7.4582	0.00015	7.45805
130	3947.16	99.35	3.95261	0.01936	3.93325					130	3930.1	98.92	7.32046	0.01791	7.30255
131	3947.16	99.35	3.84161	0.01719	3.82442					131	3928.03	98.87	7.46891	0.01807	7.45084
132	3971.46	99.96	3.20327	0.01984	3.18343					132	3972.5	99.99	7.46899	3e-05	7.46896
133	3973.01	100	2.68904	0.01939	2.66965					133	3936.31	99.08	7.45905	0.01757	7.44148
134	3971.46	99.96	3.6827	0.01882	3.66388					134	3964.41	99.78	7.4661	0.01677	7.44933
135	3932.92	98.99	3.36463	0.01933	3.3453					135	3972.17	99.98	7.46706	0.01893	7.44813
136	3969.58	99.91	3.24142	0.0175	3.22392					136	3966.86	99.85	7.45012	0.00069	7.44943
137	3962.33	99.73	3.31582	0.02193	3.29389					137	3963.95	99.77	7.41641	0.00495	7.41146
138	3968.36	99.88	3.68511	0.02142	3.66369					138	3970.95	99.95	7.45153	0.00324	7.44829
139	3973	100	3.43012	0.01918	3.41094					139	3964.92	99.8	7.43696	0.00046	7.4365
140	3972.03	99.98	3.52123	0.02161	3.49962					140	3972.67	99.99	7.4497	3e-05	7.44967
141	3963.42	99.76	3.13651	0.01715	3.11936					141	3962.98	99.75	7.46139	4e-05	7.46135
142	3971.46	99.96	3.81458	0.02063	3.79395					142	3967.84	99.87	7.44605	0.00213	7.44392
143	3970.95	99.95	3.50859	0.01904	3.48955					143	3968.82	99.89	7.46148	0.01902	7.44246
144	3972.35	99.98	3.80387	0.01568	3.78819					144	3972.67	99.99	7.45117	0.00017	7.451
145	3970.41	99.93	4.02935	0.01931	4.01004					145	3958.57	99.64	7.4444	0.01572	7.42868
146	3964.27	99.78	3.05436	0.01615	3.03821					146	3972.35	99.98	7.45832	0.0001	7.45822
147	3970.09	99.93	3.81617	0.02006	3.79611					147	3972.35	99.98	7.47261	0.00017	7.47244
148	3960.39	99.68	3.65129	0.01821	3.63308					148	3973	100	7.46898	0.00046	7.46852
149	3962.67	99.74	3.48043	0.02048	3.45995					149	3972.49	99.99	7.46992	0.0201	7.44982
150	3964.74	99.79	2.67915	0.01833	2.66082					150	3922.27	98.72	7.4464	0.02236	7.42404
151	3971.46	99.96	2.08051	0.01817	2.06234					151	3972.03	99.98	7.45901	0.00045	7.45856
152	3958.13	99.63	3.90482	0.01714	3.88768					152	3962.67	99.74	7.47258	0.00035	7.47223
153	3967.84	99.87	3.95658	0.01907	3.93751					153	3972.35	99.98	7.46387	0.00013	7.46374
154	3966.53	99.84	4.03635	0.02255	4.0138					154	3965.78	99.82	7.46257	0.0001	7.46247
155	3933.52	99.01	3.14383	0.0207	3.12313					155	3949.75	99.41	7.47282	0.01844	7.45438
156	3971.46	99.96	3.3286	0.00677	3.32183					156	3968.88	99.9	7.46451	0.01895	7.44556
157	3971.98	99.97	4.13095	0.01887	4.11208					157	3971.46	99.96	7.4668	0.00039	7.46641
158	3937.86	99.12	3.33764	0.01966	3.31798					158	3902.7	98.23	7.44952	0.01673	7.43279
159	3969.44	99.91	1.43168	0.00232	1.42936					159	3948.26	99.38	7.4517	0.0182	7.4335
160	3970.95	99.95	3.50577	0.00614	3.49963					160	3968.36	99.88	7.44121	0.00127	7.43994
161	3972.35	99.98	4.06924	0.02282	4.04642					161	3973	100	7.4533	0.00166	7.45164
162	3972.5	99.99	3.2784	0.01988	3.25852					162	3958.39	99.63	7.47243	0.01693	7.4555
163	3973	100	2.35243	0.00394	2.34849					163	3947.88	99.37	7.45974	0.01919	7.44055
164	3972.35	99.98	4.1704	0.00092	4.16948					164	3959.42	99.66	7.45158	0.00081	7.45077
165	3971.46	99.96	3.3211	0.01073	3.31037					165	3968.47	99.89	7.46318	0.0009	7.46228
166	3951.82	99.47	2.88409	0.02187	2.86222					166	3953.93	99.52	7.46962	6e-05	7.46956
167	3921.31	98.7	3.11352	0.01987	3.09365					167	3970.09	99.93	7.47276	0.00013	7.47263
168	3968.47	99.89	4.08901	0.01169	4.07732					168	3928.03	98.87	7.45418	0.01342	7.44076
169	3967.5	99.86	3.50545	0.00339	3.50206					169	3964.22	99.78	7.46406	0.01671	7.44735
170	3970.43	99.94	4.22692	0.01869	4.20823					170	3956.99	99.6	7.47232	0.00021	7.47211
171	3970.09	99.93	2.8657	0.02197	2.84373					171	3953.37	99.51	7.46144	0.01875	7.44269
172	3968.36	99.88	3.37269	0.01725	3.35544					172	3959.1	99.65	7.42781	1e-05	7.4278
173	3967.5	99.86	3.55147	0.02038	3.53109					173	3971.98	99.97	7.46557	7e-05	7.4655
174	3967.84	99.87	3.61729	0.01555	3.60174					174	3969.44	99.91	7.4382	9e-05	7.43811
175	3971.98	99.97	3.76941	0.01884	3.75057					175	3969.91	99.92	7.46107	0.0222	7.43887
176	3964.59	99.79	3.24593	0.00965	3.23628					176	3973	100	7.46618	0.00022	7.46596
177	3970.41	99.93	2.18454	0.01879	2.16575					177	3956.47	99.58	7.46086	0.01933	7.44153
178	3971.52	99.96	2.68028	0.01702	2.66326					178	3883.12	97.74	7.43585	0.02018	7.41567
179	3930.01	98.92	3.75078	0.01537	3.73541					179	3973.01	100	7.47217	3e-05	7.47214
180	3931.9	98.97	3.57514	0.01692	3.55822					180	3958.54	99.64	7.47004	0.01753	7.45251
181	3972.67	99.99	3.14937	0.0228	3.12657					181	3930.34	98.93	7.37835	0	7.37835
182	3968.8	99.89	4.2933	0.01858	4.27472					182	3973	100	7.47201	8e-05	7.47193
183	3961.16	99.7	3.89488	0.01798	3.8769					183	3910.95	98.44	7.46676	0.00014	7.46662
184	3971.98	99.97	3.80338	0.0176	3.78578					184	3897.38	98.1	7.47263	4e-05	7.47259
185	3939.93	99.17	3.91437	0.01967	3.8947					185	3967.18	99.85	7.46315	0.00047	7.46268
186	3966.86	99.85	2.25703	0.01653	2.2405					186	3956.19	99.58	7.4597	0.00018	7.45952
187	3967.64	99.86	4.07105	0.01621	4.05484					187	3953.61	99.51	7.47209	0.00015	7.47194
188	3959.13	99.65	3.95835	0.02022	3.93813					188	3972.35	99.98	7.45411	2e-05	7.45409
189	3937.86	99.12	3.86864	0.0167	3.85194					189	3972.67	99.99	7.46728	0.00035	7.46693
190	3968.36	99.88	3.28128	0.01639	3.26489					190	3970.09	99.93	7.46053	0.00033	7.4602
191	3964.92	99.8	3.33878	0.00838	3.3304					191	3970.09	99.93	7.45741	0.00016	7.45725
192	3959.42	99.66	3.36765	0.00784	3.35981					192	3972.67	99.99	7.4562	0.00119	7.45501
193	3962.01	99.72	3.72891	0.01326	3.71565					193	3966.56	99.84	7.46254	0.01932	7.44322
194	3959.05	99.65	3.51365	0.01318	3.50047					194	3954.74	99.54	7.46107	0.02034	7.44073
195	3971.98	99.97	3.25403	0.01887	3.23516					195	3959.05	99.65	7.46426	0.01862	7.44564
196	3932.17	98.97	3.27725	0.02229	3.25496					196	3967.18	99.85	7.4529	1e-05	7.45289
197	3968.36	99.88	3.62294	0.02106	3.60188					197	3898.05	98.11	7.44477	0.00096	7.44381
198	3966.86	99.85	4.07764	0.00579	4.07185					198	3933.89	99.02	7.46827	0.00015	7.46812
199	3971.46	99.96	3.58922	0.00731	3.58191					199	3967.84	99.87	7.46037	0.00031	7.46006
200	3959.05	99.65	3.83624	0.01933	3.81691					200	3970.41	99.93	7.43944	0.0048	7.43464

## Sheet: 02_ACOA_Seeds(2)
Fast Converegnce Exp							Fast Converegnce Exp			Slow Converegnce Exp							Slow Converegnce Exp
#	CBLF	Quality	Taumax	Taumin	DeltaTauminmax		Global Optimal Solution =	3973.01		#	CBLF	Quality	Taumax	Taumin	DeltaTauminmax		Global Optimal Solution =	3973.01
1	3962.67	99.74	3.52898	0.0157	3.51328		Minimum Optimal Solution =	3888.23		1	3962.67	99.74	7.43989	0.00514	7.43475		Minimum Optimal Solution =	3876.69
2	3936.97	99.09	4.20454	0.01899	4.18555		Mean of Optimal Solution =	3962.55		2	3964.92	99.8	7.46844	0.00013	7.46831		Mean of Optimal Solution =	3961.23
3	3968.36	99.88	3.03664	0.01219	3.02445		Median of Optimal Solution =	3962.55		3	3903.22	98.24	7.46978	0.01794	7.45184		Median of Optimal Solution =	3961.23
4	3968.36	99.88	3.99264	0.01378	3.97886		Solution Standrad Deviation =	13.45		4	3972.5	99.99	7.46716	0.02079	7.44637		Solution Standrad Deviation =	16.2315
5	3967.82	99.87	3.96146	0.01705	3.94441		Average Price =	18.94		5	3966.53	99.84	7.45961	4e-05	7.45957		Average Price =	65.38
6	3967.82	99.87	3.82657	0.01299	3.81358		Relability =	39		6	3950.27	99.43	7.47027	0.01978	7.45049		Relability =	37.5
7	3968.36	99.88	3.1759	0.0222	3.1537		Normalized Price =	48.5641		7	3970.73	99.94	7.4577	0.00027	7.45743		Normalized Price =	174.347
8	3972.67	99.99	4.42112	0.00294	4.41818		Average Solution Quality =	99.7366		8	3972.67	99.99	7.45721	1e-05	7.4572		Average Solution Quality =	99.7035
9	3949.2	99.4	2.51571	0.01756	2.49815		Average FDC =	-132.956		9	3959.05	99.65	7.47012	0.01749	7.45263		Average FDC =	-46.6192
10	3964.74	99.79	3.69666	0.01208	3.68458		Correlation Coefficent =	-0.79948		10	3961.64	99.71	7.46869	0.01884	7.44985		Correlation Coefficent =	-0.847
11	3968.15	99.88	2.76683	0.01064	2.75619		Solution Robustness =	294.613		11	3972.35	99.98	7.45754	7e-05	7.45747		Solution Robustness =	244.046
12	3971.98	99.97	3.64222	0.01813	3.62409		Performance Rate =	0.020591		12	3972.35	99.98	7.44358	0.00043	7.44315		Performance Rate =	0.0057357
13	3969.39	99.91	2.94707	0.01941	2.92766		Average Elapsed Time =	0.86266		13	3971.98	99.97	7.35068	0.01749	7.33319		Average Elapsed Time =	2.9453
14	3962.45	99.73	3.23089	0.01694	3.21395					14	3973	100	7.45682	0.00014	7.45668
15	3971.98	99.97	4.2663	0.01626	4.25004					15	3970.73	99.94	7.46897	0.00012	7.46885
16	3972.35	99.98	3.20366	0.00965	3.19401					16	3940.12	99.17	7.47149	0.02097	7.45052
17	3953.28	99.5	3.72864	0.00505	3.72359					17	3972.5	99.99	7.4647	0.00039	7.46431
18	3971.46	99.96	3.66976	0.01977	3.64999					18	3943.55	99.26	7.43526	0.01712	7.41814
19	3973	100	3.40543	0.01866	3.38677					19	3967.84	99.87	7.45864	5e-05	7.45859
20	3971.85	99.97	3.31736	0.01864	3.29872					20	3966.86	99.85	7.46401	7e-05	7.46394
21	3903.22	98.24	3.79563	0.01928	3.77635					21	3968.36	99.88	7.468	0.00051	7.46749
22	3902.83	98.23	3.93495	0.02167	3.91328					22	3973.01	100	7.45541	0.00023	7.45518
23	3970.73	99.94	3.62723	0.01832	3.60891					23	3972.35	99.98	7.45716	8e-05	7.45708
24	3972.5	99.99	3.58449	0.01364	3.57085					24	3970.73	99.94	7.46376	0.00011	7.46365
25	3952.33	99.48	3.37767	0.02126	3.35641					25	3969.12	99.9	7.46466	0.00014	7.46452
26	3972.35	99.98	2.68588	0.01869	2.66719					26	3949.23	99.4	7.45966	0.02007	7.43959
27	3972.03	99.98	3.69478	0.01694	3.67784					27	3971.46	99.96	7.44381	8e-05	7.44373
28	3972.03	99.98	4.01631	0.01359	4.00272					28	3972.67	99.99	7.45311	0.00464	7.44847
29	3972.03	99.98	3.76634	0.00092	3.76542					29	3971.98	99.97	7.46483	0.00016	7.46467
30	3968.36	99.88	3.55639	0.0145	3.54189					30	3963.71	99.77	7.47584	7e-05	7.47577
31	3958.54	99.64	3.8231	0.01873	3.80437					31	3962.98	99.75	7.46526	0.00023	7.46503
32	3957.95	99.62	3.40701	0.01434	3.39267					32	3972.35	99.98	7.44941	0.00023	7.44918
33	3967.84	99.87	3.23074	0.0105	3.22024					33	3971.98	99.97	7.46964	0.00033	7.46931
34	3968.36	99.88	3.62451	0.01613	3.60838					34	3964.92	99.8	7.46414	0.00022	7.46392
35	3969.91	99.92	3.62666	0.01542	3.61124					35	3926.81	98.84	7.4702	0.01757	7.45263
36	3972.67	99.99	3.06826	0.01742	3.05084					36	3959.05	99.65	7.47118	0.0165	7.45468
37	3940.96	99.19	3.90566	0.01522	3.89044					37	3972.35	99.98	7.45897	0.00054	7.45843
38	3966.53	99.84	2.74121	0.01734	2.72387					38	3964.92	99.8	7.47265	4e-05	7.47261
39	3947.91	99.37	3.79288	0.01685	3.77603					39	3961.12	99.7	7.47022	0.01942	7.4508
40	3971.85	99.97	3.71812	0.01872	3.6994					40	3973	100	7.44903	0.00016	7.44887
41	3968.88	99.9	3.47428	0.01995	3.45433					41	3966.53	99.84	7.46671	0.00035	7.46636
42	3972.67	99.99	3.52436	0.00976	3.5146					42	3972.35	99.98	7.43488	0.00078	7.4341
43	3970.41	99.93	3.70101	0.01199	3.68902					43	3973.01	100	7.45585	0.00028	7.45557
44	3959.57	99.66	3.44146	0.01657	3.42489					44	3957.16	99.6	7.46947	0.00014	7.46933
45	3964.92	99.8	4.04636	0.01427	4.03209					45	3968.36	99.88	7.4714	4e-05	7.47136
46	3945.85	99.32	3.32373	0.02039	3.30334					46	3966.53	99.84	7.46997	0.00012	7.46985
47	3965.26	99.8	3.60975	0.00647	3.60328					47	3972.67	99.99	7.46565	7e-05	7.46558
48	3919.25	98.65	3.7854	0.017	3.7684					48	3965.78	99.82	7.46967	0.01592	7.45375
49	3968.8	99.89	3.48622	0.01984	3.46638					49	3969.12	99.9	7.46626	0.00018	7.46608
50	3961.16	99.7	3.62197	0.0215	3.60047					50	3966.86	99.85	7.46481	2e-05	7.46479
51	3955.44	99.56	3.79661	0.01991	3.7767					51	3961.36	99.71	7.46171	2e-05	7.46169
52	3972.35	99.98	3.86627	0.01635	3.84992					52	3968.5	99.89	7.46455	0.01895	7.4456
53	3922.58	98.73	3.82832	0.01562	3.8127					53	3970.09	99.93	7.46782	0.00022	7.4676
54	3970.95	99.95	4.039	0.01897	4.02003					54	3935.46	99.05	7.47099	0.0201	7.45089
55	3968.8	99.89	3.66642	0.01848	3.64794					55	3966.86	99.85	7.44995	1e-05	7.44994
56	3960.01	99.67	2.43028	0.01769	2.41259					56	3969.39	99.91	7.46813	0.00043	7.4677
57	3972.03	99.98	3.76471	0.0053	3.75941					57	3961.04	99.7	7.46115	0.00119	7.45996
58	3970.41	99.93	3.58298	0.00423	3.57875					58	3962.67	99.74	7.41357	0.00918	7.40439
59	3951.05	99.45	3.88418	0.01574	3.86844					59	3882.02	97.71	7.35807	0.02152	7.33655
60	3965.24	99.8	3.64753	0.01782	3.62971					60	3959.91	99.67	7.37194	0.0168	7.35514
61	3940.44	99.18	3.30712	0.0163	3.29082					61	3972.67	99.99	7.46177	0.00014	7.46163
62	3969.39	99.91	3.59401	0.01763	3.57638					62	3972.67	99.99	7.4693	0.00012	7.46918
63	3973	100	3.45695	0.00434	3.45261					63	3957.5	99.61	7.47325	0.00025	7.473
64	3954.9	99.54	3.7978	0.007	3.7908					64	3947.79	99.37	7.46555	0.00016	7.46539
65	3972.5	99.99	2.9582	0.02014	2.93806					65	3902.19	98.22	7.4669	0.01782	7.44908
66	3970.73	99.94	3.92123	0.01827	3.90296					66	3959.05	99.65	7.46573	0.02144	7.44429
67	3965.24	99.8	3.48845	0.02064	3.46781					67	3972.67	99.99	7.43264	0	7.43264
68	3951.99	99.47	4.10962	0.01736	4.09226					68	3967.18	99.85	7.44833	0.00066	7.44767
69	3965.78	99.82	3.4769	0.01958	3.45732					69	3943.03	99.25	7.4694	0.01735	7.45205
70	3952.08	99.47	3.40603	0.01521	3.39082					70	3881.51	97.7	7.44901	0.01952	7.42949
71	3970.73	99.94	3.45996	0.00405	3.45591					71	3967.5	99.86	7.46194	0.00051	7.46143
72	3964.74	99.79	4.04426	0.01753	4.02673					72	3972.67	99.99	7.45598	5e-05	7.45593
73	3973.01	100	2.23442	0.01845	2.21597					73	3960.09	99.67	7.44774	0.01908	7.42866
74	3959.05	99.65	3.61557	0.01907	3.5965					74	3972.35	99.98	7.46255	0.00027	7.46228
75	3972.35	99.98	2.50131	0.02049	2.48082					75	3964.74	99.79	7.4672	0.01653	7.45067
76	3968.88	99.9	3.18468	0.01886	3.16582					76	3972.17	99.98	7.41687	0.01614	7.40073
77	3966.29	99.83	3.8233	0.00833	3.81497					77	3950.7	99.44	7.44031	0.00113	7.43918
78	3968.88	99.9	3.62511	0.00324	3.62187					78	3957.28	99.6	7.36663	0.01582	7.35081
79	3971.85	99.97	3.97753	0.01934	3.95819					79	3958.25	99.63	7.44853	0.01787	7.43066
80	3968.15	99.88	3.689	0.01701	3.67199					80	3921.83	98.71	7.46815	0.02024	7.44791
81	3967.84	99.87	3.55578	0.01859	3.53719					81	3962.16	99.73	7.41363	0.02081	7.39282
82	3961.68	99.71	3.18914	0.01549	3.17365					82	3965.26	99.8	7.46058	0.02213	7.43845
83	3968.15	99.88	2.63421	0.02043	2.61378					83	3948.72	99.39	7.46445	0.02048	7.44397
84	3966.53	99.84	2.64383	0.01921	2.62462					84	3973	100	7.46917	0.00068	7.46849
85	3971.46	99.96	3.86461	0.00113	3.86348					85	3961.62	99.71	7.45261	0.02034	7.43227
86	3951.02	99.45	3.76227	0.01773	3.74454					86	3942.51	99.23	7.46808	0.01806	7.45002
87	3968.8	99.89	3.3394	0.01844	3.32096					87	3964.74	99.79	7.46158	3e-05	7.46155
88	3960.86	99.69	1.96364	0.02103	1.94261					88	3958.89	99.64	7.44295	0.02056	7.42239
89	3970.41	99.93	3.6962	0.01948	3.67672					89	3965.26	99.8	7.47358	0.01603	7.45755
90	3972.5	99.99	3.67294	0.01433	3.65861					90	3958.54	99.64	7.46457	0.02093	7.44364
91	3961.36	99.71	3.38834	0.01956	3.36878					91	3972.5	99.99	7.46636	0.00024	7.46612
92	3959.1	99.65	4.01631	0.00487	4.01144					92	3972.67	99.99	7.47215	0.00011	7.47204
93	3963.95	99.77	3.48003	0.01338	3.46665					93	3970.41	99.93	7.4672	0.00075	7.46645
94	3970.41	99.93	4.04395	0.00792	4.03603					94	3971.06	99.95	7.45858	0.00017	7.45841
95	3972.35	99.98	3.3535	0.01809	3.33541					95	3963.33	99.76	7.45434	0.01712	7.43722
96	3966.86	99.85	3.89366	0.01664	3.87702					96	3964.22	99.78	7.39987	0.00839	7.39148
97	3959.1	99.65	4.18072	0.01927	4.16145					97	3924.93	98.79	7.46638	0.0182	7.44818
98	3950.08	99.42	4.04774	0.01788	4.02986					98	3964.92	99.8	7.47258	0.00014	7.47244
99	3949.75	99.41	4.01637	0.01861	3.99776					99	3971.52	99.96	7.44718	0.02211	7.42507
100	3972.35	99.98	4.01804	0.01045	4.00759					100	3965.78	99.82	7.45016	0.02037	7.42979
101	3949.75	99.41	3.5646	0.0126	3.552					101	3968.8	99.89	7.45835	0.00016	7.45819
102	3962.66	99.74	2.97941	0.01545	2.96396					102	3968.88	99.9	7.46253	0.01702	7.44551
103	3957.16	99.6	3.66217	0.01891	3.64326					103	3972.67	99.99	7.4665	7e-05	7.46643
104	3949.43	99.41	2.93145	0.02138	2.91007					104	3966.56	99.84	7.45506	0.02044	7.43462
105	3970.41	99.93	3.7467	0.01038	3.73632					105	3971.06	99.95	7.4713	1e-05	7.47129
106	3968.15	99.88	2.89538	0.01808	2.8773					106	3956.95	99.6	7.46228	0.01768	7.4446
107	3963.71	99.77	4.00441	0.00102	4.00339					107	3963.77	99.77	7.46193	0.01907	7.44286
108	3970.41	99.93	2.87356	0.01844	2.85512					108	3951.34	99.45	7.46776	7e-05	7.46769
109	3940.45	99.18	3.739	0.02054	3.71846					109	3958.78	99.64	7.45447	9e-05	7.45438
110	3970.09	99.93	3.34085	0.01812	3.32273					110	3964.74	99.79	7.46805	4e-05	7.46801
111	3953.37	99.51	3.43551	0.02005	3.41546					111	3972.67	99.99	7.4297	7e-05	7.42963
112	3968.36	99.88	3.0298	0.00839	3.02141					112	3957.74	99.62	7.44537	0.01879	7.42658
113	3972.35	99.98	4.0158	0.02157	3.99423					113	3965.26	99.8	7.46803	8e-05	7.46795
114	3971.38	99.96	2.65513	0.01921	2.63592					114	3970.09	99.93	7.46551	0.00022	7.46529
115	3972.5	99.99	4.08901	0.01061	4.0784					115	3941.48	99.21	7.47116	0.00014	7.47102
116	3967.64	99.86	3.76368	0.01934	3.74434					116	3942.51	99.23	7.4664	0.01813	7.44827
117	3970.43	99.94	3.51116	0.01425	3.49691					117	3972.5	99.99	7.4666	0.00011	7.46649
118	3973.01	100	4.00146	0.01734	3.98412					118	3965.26	99.8	7.46489	0.00045	7.46444
119	3926.15	98.82	3.75684	0.018	3.73884					119	3972.35	99.98	7.45851	0.00042	7.45809
120	3962.67	99.74	3.20149	0.01187	3.18962					120	3972.35	99.98	7.46272	0.00027	7.46245
121	3971.98	99.97	3.99226	0.0144	3.97786					121	3972.67	99.99	7.46847	1e-05	7.46846
122	3969.12	99.9	2.63017	0.01818	2.61199					122	3966.53	99.84	7.46876	1e-05	7.46875
123	3969.44	99.91	4.11898	0.00648	4.1125					123	3972.35	99.98	7.46364	0.00336	7.46028
124	3972.03	99.98	3.76224	0.01966	3.74258					124	3966.86	99.85	7.46662	0.0001	7.46652
125	3972.35	99.98	3.53284	0.01889	3.51395					125	3968.29	99.88	7.45491	0.0165	7.43841
126	3969.76	99.92	3.96931	0.02034	3.94897					126	3959.57	99.66	7.39856	0.01828	7.38028
127	3973	100	3.52506	0.02235	3.50271					127	3971.38	99.96	7.45942	0.00094	7.45848
128	3973	100	3.8584	0.00773	3.85067					128	3947.47	99.36	7.47123	0.00153	7.4697
129	3970.73	99.94	3.35598	0.01241	3.34357					129	3972.67	99.99	7.47038	0.00036	7.47002
130	3940.44	99.18	3.47238	0.01659	3.45579					130	3956.84	99.59	7.4557	0.00018	7.45552
131	3961.12	99.7	3.7477	0.01942	3.72828					131	3968.88	99.9	7.4442	0.00228	7.44192
132	3953.61	99.51	3.41894	0.00416	3.41478					132	3973	100	7.47116	4e-05	7.47112
133	3972.35	99.98	1.96163	0.02042	1.94121					133	3965.38	99.81	7.42963	0.01659	7.41304
134	3969.26	99.91	2.83283	0.01909	2.81374					134	3961.64	99.71	7.4536	0.00248	7.45112
135	3952.66	99.49	2.94249	0.0036	2.93889					135	3934.76	99.04	7.466	0.01456	7.45144
136	3959.75	99.67	3.95953	0.0036	3.95593					136	3943.55	99.26	7.46403	0.0182	7.44583
137	3969.91	99.92	3.06816	0.01787	3.05029					137	3971.46	99.96	7.47271	0.01887	7.45384
138	3971.98	99.97	3.82285	0.01358	3.80927					138	3932.6	98.98	7.46715	0.00018	7.46697
139	3972.35	99.98	3.4631	0.01683	3.44627					139	3939.39	99.15	7.46831	0.00046	7.46785
140	3965.24	99.8	3.93816	0.01623	3.92193					140	3961.64	99.71	7.46152	0.01853	7.44299
141	3941.33	99.2	4.10005	0.01958	4.08047					141	3970.95	99.95	7.46704	0.01857	7.44847
142	3968.36	99.88	2.31186	0.00626	2.3056					142	3972.03	99.98	7.45712	0.00032	7.4568
143	3973	100	4.09533	0.00067	4.09466					143	3957.5	99.61	7.45619	0.00013	7.45606
144	3970.41	99.93	3.60321	0.01905	3.58416					144	3964.22	99.78	7.47508	0.01908	7.456
145	3968.36	99.88	3.64481	0.00899	3.63582					145	3970.95	99.95	7.46053	0.00031	7.46022
146	3973	100	3.14721	0.00554	3.14167					146	3972.5	99.99	7.45325	0.00043	7.45282
147	3968.88	99.9	4.08667	0.01936	4.06731					147	3970.95	99.95	7.46487	0.0001	7.46477
148	3953.37	99.51	4.17588	0.0161	4.15978					148	3967.84	99.87	7.46484	0.01591	7.44893
149	3959.57	99.66	3.58275	0.02213	3.56062					149	3968.88	99.9	7.45338	0.0176	7.43578
150	3959.1	99.65	3.8562	0.01066	3.84554					150	3962.67	99.74	7.46371	0.00022	7.46349
151	3970.41	99.93	4.05803	0.00501	4.05302					151	3932.07	98.97	7.47128	0.02033	7.45095
152	3964.74	99.79	3.957	0.01884	3.93816					152	3969.12	99.9	7.46974	1e-05	7.46973
153	3951.76	99.47	4.18618	0.01809	4.16809					153	3972.35	99.98	7.46694	4e-05	7.4669
154	3959.05	99.65	3.07227	0.02224	3.05003					154	3939.93	99.17	7.44668	0.01771	7.42897
155	3962.67	99.74	3.55751	0.01755	3.53996					155	3965.26	99.8	7.47236	0.0167	7.45566
156	3963.71	99.77	3.59888	0.01558	3.5833					156	3972.5	99.99	7.44027	0.00017	7.4401
157	3971.98	99.97	1.92181	0.01657	1.90524					157	3950.78	99.44	7.47191	0.00012	7.47179
158	3967.84	99.87	3.57853	0.01697	3.56156					158	3973.01	100	7.38028	0.00806	7.37222
159	3966.68	99.84	3.56436	0.01929	3.54507					159	3973	100	7.4401	0.00027	7.43983
160	3970.88	99.95	4.09102	0.01844	4.07258					160	3960.72	99.69	7.46156	5e-05	7.46151
161	3941.97	99.22	3.75601	0.01885	3.73716					161	3935.27	99.05	7.41974	0.00626	7.41348
162	3966.86	99.85	3.27797	0.01794	3.26003					162	3936.59	99.08	7.4616	0.02129	7.44031
163	3970.73	99.94	3.75056	0.02015	3.73041					163	3965.26	99.8	7.4603	0.00045	7.45985
164	3940.44	99.18	3.33781	0.02033	3.31748					164	3921.18	98.7	7.46679	0.01786	7.44893
165	3964.62	99.79	3.61248	0.0203	3.59218					165	3968.5	99.89	7.46987	0.0183	7.45157
166	3962.66	99.74	4.09409	0.0128	4.08129					166	3970.95	99.95	7.46788	0.00065	7.46723
167	3968.36	99.88	2.7941	0.01904	2.77506					167	3966.29	99.83	7.47009	0.00111	7.46898
168	3955.95	99.57	3.26354	0.01956	3.24398					168	3966.53	99.84	7.46767	0.00016	7.46751
169	3967.18	99.85	4.10418	0.01666	4.08752					169	3876.69	97.58	7.47245	6e-05	7.47239
170	3966.86	99.85	3.48369	0.00288	3.48081					170	3972.67	99.99	7.46751	8e-05	7.46743
171	3963.62	99.76	3.60066	0.02048	3.58018					171	3968.82	99.89	7.42478	0.01808	7.4067
172	3951.82	99.47	3.64701	0.01667	3.63034					172	3962.98	99.75	7.42487	0.00683	7.41804
173	3972.49	99.99	3.46036	0.01696	3.4434					173	3949.73	99.41	7.46885	0.00014	7.46871
174	3971.52	99.96	2.30029	0.0196	2.28069					174	3952.31	99.48	7.44394	0.00012	7.44382
175	3888.23	97.87	3.56435	0.02043	3.54392					175	3972.35	99.98	7.46736	8e-05	7.46728
176	3972.35	99.98	3.55471	0.0202	3.53451					176	3964.22	99.78	7.46888	0.01884	7.45004
177	3970.41	99.93	3.77197	0.01389	3.75808					177	3970.73	99.94	7.46203	0.00038	7.46165
178	3955.87	99.57	4.07336	0.01931	4.05405					178	3971.98	99.97	7.46536	0.00016	7.4652
179	3972.35	99.98	3.97835	0.01525	3.9631					179	3965.78	99.82	7.46418	0.00019	7.46399
180	3970.41	99.93	3.43737	0.01554	3.42183					180	3967.84	99.87	7.43753	1e-05	7.43752
181	3926.8	98.84	3.56323	0.01846	3.54477					181	3966.86	99.85	7.46645	0.00044	7.46601
182	3952.33	99.48	3.95538	0.01771	3.93767					182	3973.01	100	7.3852	7e-05	7.38513
183	3964.74	99.79	3.30492	0.02078	3.28414					183	3970.23	99.93	7.42764	0.01687	7.41077
184	3968.36	99.88	4.17548	0.01983	4.15565					184	3966.53	99.84	7.47037	8e-05	7.47029
185	3949.73	99.41	3.55928	0.01807	3.54121					185	3946.13	99.32	7.46284	0.02358	7.43926
186	3970.41	99.93	3.78681	0.00514	3.78167					186	3954.92	99.54	7.45192	0.00016	7.45176
187	3971.06	99.95	4.12082	0.02015	4.10067					187	3959.57	99.66	7.46108	0.01635	7.44473
188	3953.37	99.51	4.36583	0.01757	4.34826					188	3970.73	99.94	7.47145	0.00012	7.47133
189	3968.36	99.88	3.85056	0.01401	3.83655					189	3959.57	99.66	7.46975	0.01815	7.4516
190	3969.39	99.91	3.50953	0.01898	3.49055					190	3969.44	99.91	7.46593	7e-05	7.46586
191	3971.98	99.97	3.9867	0.01425	3.97245					191	3964.27	99.78	7.46371	0.00037	7.46334
192	3929.69	98.91	3.92814	0.00776	3.92038					192	3971.98	99.97	7.45575	0.00021	7.45554
193	3951.76	99.47	3.3551	0.01748	3.33762					193	3961.04	99.7	7.45136	0.00048	7.45088
194	3971.98	99.97	2.18466	0.01938	2.16528					194	3939.41	99.15	7.46291	0.01855	7.44436
195	3966.53	99.84	3.07452	0.01829	3.05623					195	3972.35	99.98	7.4641	0.00172	7.46238
196	3961.71	99.72	3.69792	0.01857	3.67935					196	3953.7	99.51	7.43431	0.01952	7.41479
197	3964.22	99.78	3.42555	0.02183	3.40372					197	3972.03	99.98	7.45215	0.00012	7.45203
198	3972.35	99.98	3.94744	0.01779	3.92965					198	3953.37	99.51	7.4698	0.01638	7.45342
199	3964.41	99.78	2.58306	0.02041	2.56265					199	3971.98	99.97	7.35139	0.00599	7.3454
200	3925.97	98.82	2.39116	0.02082	2.37034					200	3973	100	7.46222	0.00013	7.46209

## Sheet: 03_ACOA_Seeds(50)
Fast Converegnce Exp							Fast Converegnce Exp			Slow Converegnce Exp							Slow Converegnce Exp
#	CBLF	Quality	Taumax	Taumin	DeltaTauminmax		Global Optimal Solution =	3973.01		#	CBLF	Quality	Taumax	Taumin	DeltaTauminmax		Global Optimal Solution =	3973.01
1	3971.46	99.96	3.75839	0.00219	3.7562		Minimum Optimal Solution=	3863.38		1	3971.46	99.96	7.46334	2e-05	7.46332		Minimum Optimal Solution =	3861.81
2	3934.24	99.02	3.48946	0.01732	3.47214		Mean of Optimal Solution =	3958.72		2	3959.57	99.66	7.46483	0.00011	7.46472		Mean of Optimal Solution =	3962.29
3	3951.99	99.47	3.79237	0.01436	3.77801		Median of Optimal Solution =	3958.72		3	3946.65	99.34	7.32359	0.01624	7.30735		Median of Optimal Solution =	3962.29
4	3955.66	99.56	3.48109	0.02138	3.45971		Solution Standrad Deviation =	19.9431		4	3973.01	100	7.43055	0.00048	7.43007		Solution Standrad Deviation =	17.2491
5	3963.19	99.75	3.92088	0.01967	3.90121		Average Price =	19.06		5	3971.06	99.95	7.46779	3e-05	7.46776		Average Price =	66.135
6	3964.92	99.8	3.00442	0.01544	2.98898		Relability =	42.5		6	3960.83	99.69	7.46447	0.01981	7.44466		Relability =	42.5
7	3957.95	99.62	3.07592	0.02311	3.05281		Normalized Price =	44.8471		7	3967.33	99.86	7.45479	0.01956	7.43523		Normalized Price =	155.612
8	3968.47	99.89	4.11619	0.00324	4.11295		Average Solution Quality =	99.6404		8	3960.39	99.68	7.422	0.00012	7.42188		Average Solution Quality =	99.7302
9	3916.14	98.57	3.14695	0.0171	3.12985		Average FDC =	-136.022		9	3969.47	99.91	7.41012	0.02124	7.38888		Average FDC =	-47.1338
10	3970.09	99.93	3.4894	0.02099	3.46841		Correlation Coefficent =	-0.8015		10	3952.31	99.48	7.4688	0.00015	7.46865		Correlation Coefficent =	-0.83511
11	3972.35	99.98	3.29509	0.01474	3.28035		Solution Robustness =	198.501		11	3953.89	99.52	7.45835	0.01476	7.44359		Solution Robustness =	229.711
12	3971.98	99.97	3.86707	0.0173	3.84977		Performance Rate =	0.022298		12	3880.26	97.67	7.46294	0.01985	7.44309		Performance Rate =	0.0064262
13	3924.52	98.78	3.54852	0.01805	3.53047		Average Elapsed Time =	0.86622		13	3972.35	99.98	7.46015	2e-05	7.46013		Average Elapsed Time =	2.9904
14	3970.95	99.95	3.87756	0.00976	3.8678					14	3952.33	99.48	7.46535	0.01954	7.44581
15	3901.67	98.2	3.79888	0.02347	3.77541					15	3969.76	99.92	7.46405	0.00124	7.46281
16	3965.26	99.8	3.68601	0.02077	3.66524					16	3959.57	99.66	7.45681	0.00025	7.45656
17	3970.73	99.94	2.63395	0.02017	2.61378					17	3971.06	99.95	7.46638	0.00022	7.46616
18	3971.06	99.95	4.25775	0.01364	4.24411					18	3946.13	99.32	7.45197	0.00016	7.45181
19	3959.05	99.65	3.43768	0.01684	3.42084					19	3960.39	99.68	7.43676	0.00215	7.43461
20	3863.38	97.24	4.04576	0.01974	4.02602					20	3967.84	99.87	7.47209	0.00017	7.47192
21	3972.03	99.98	3.21189	0.0036	3.20829					21	3966.56	99.84	7.45104	0.01628	7.43476
22	3970.73	99.94	3.50655	0.01695	3.4896					22	3972.67	99.99	7.45745	0.00073	7.45672
23	3972.5	99.99	3.23783	0.01559	3.22224					23	3960.72	99.69	7.46215	0.00082	7.46133
24	3964.92	99.8	3.72286	0.01357	3.70929					24	3954.37	99.53	7.45174	0.01606	7.43568
25	3971.46	99.96	3.90074	0.02109	3.87965					25	3938.38	99.13	7.47068	7e-05	7.47061
26	3972.03	99.98	3.20613	0.008	3.19813					26	3968.36	99.88	7.45269	0.00023	7.45246
27	3973.01	100	2.63257	0.00856	2.62401					27	3958.13	99.63	7.44578	0.0027	7.44308
28	3970.73	99.94	3.43919	0.02038	3.41881					28	3964.27	99.78	7.3864	0.00448	7.38192
29	3886.65	97.83	3.44007	0.0189	3.42117					29	3972.35	99.98	7.46394	0.00022	7.46372
30	3970.41	99.93	3.63096	0.01686	3.6141					30	3961.68	99.71	7.46592	0.00064	7.46528
31	3959.45	99.66	2.27221	0.02372	2.24849					31	3908.33	98.37	7.46616	0.02411	7.44205
32	3913.25	98.5	3.43244	0.01977	3.41267					32	3969.14	99.9	7.46464	0.02038	7.44426
33	3971.38	99.96	3.91555	0.00455	3.911					33	3966.86	99.85	7.43557	0.0027	7.43287
34	3970.41	99.93	2.5613	0.00971	2.55159					34	3964.92	99.8	7.43824	0.00064	7.4376
35	3969.76	99.92	3.5129	0.01655	3.49635					35	3861.81	97.2	7.3576	0.02406	7.33354
36	3971.38	99.96	3.81374	0.00754	3.8062					36	3972.67	99.99	7.46843	0.00019	7.46824
37	3968.8	99.89	3.87836	0.01552	3.86284					37	3970.41	99.93	7.44687	0.0001	7.44677
38	3972.67	99.99	3.42526	0.00383	3.42143					38	3966.86	99.85	7.4673	0.00019	7.46711
39	3972.5	99.99	4.37705	0.02109	4.35596					39	3968.82	99.89	7.46428	0.01858	7.4457
40	3966.88	99.85	4.01124	0.01749	3.99375					40	3968.36	99.88	7.46551	0.00018	7.46533
41	3940.44	99.18	3.69717	0.01789	3.67928					41	3973	100	7.41373	0.00152	7.41221
42	3972.35	99.98	3.50275	0.01614	3.48661					42	3965.24	99.8	7.46512	0.00062	7.4645
43	3941.33	99.2	2.5124	0.01894	2.49346					43	3969.76	99.92	7.46576	0.00051	7.46525
44	3942.39	99.23	3.76527	0.0188	3.74647					44	3964.92	99.8	7.46749	0.00014	7.46735
45	3972.5	99.99	3.02291	0.02049	3.00242					45	3970.09	99.93	7.46689	3e-05	7.46686
46	3971.98	99.97	3.88438	0.00655	3.87783					46	3972.67	99.99	7.46818	0.00021	7.46797
47	3967.5	99.86	3.55648	0.01954	3.53694					47	3952.96	99.5	7.4693	6e-05	7.46924
48	3897.72	98.11	4.0801	0.02055	4.05955					48	3945.1	99.3	7.47007	0.00029	7.46978
49	3970.41	99.93	4.04037	0.01938	4.02099					49	3972.03	99.98	7.4668	0.00017	7.46663
50	3966.81	99.84	4.01962	0.00775	4.01187					50	3972.5	99.99	7.46979	0.00039	7.4694
51	3972.5	99.99	4.15246	0.01815	4.13431					51	3965.24	99.8	7.45858	0.00139	7.45719
52	3966.81	99.84	3.03789	0.01983	3.01806					52	3967.18	99.85	7.45789	4e-05	7.45785
53	3966.24	99.83	3.53731	0.02081	3.5165					53	3968.36	99.88	7.44893	0.00238	7.44655
54	3973.01	100	3.76342	0.01353	3.74989					54	3926.47	98.83	7.43465	0.01759	7.41706
55	3959.57	99.66	4.01372	0.01895	3.99477					55	3953.61	99.51	7.44649	7e-05	7.44642
56	3966.56	99.84	3.28314	0.02253	3.26061					56	3961.36	99.71	7.46154	0.00022	7.46132
57	3971.98	99.97	3.00185	0.01621	2.98564					57	3872.2	97.46	7.47201	0.01625	7.45576
58	3961.36	99.71	3.2144	0.01797	3.19643					58	3972.35	99.98	7.45865	0.00015	7.4585
59	3970.95	99.95	3.69336	0.01664	3.67672					59	3958.13	99.63	7.47131	6e-05	7.47125
60	3969.76	99.92	3.18935	0.01888	3.17047					60	3972.67	99.99	7.46651	5e-05	7.46646
61	3897.02	98.09	3.75477	0.01935	3.73542					61	3968.88	99.9	7.46709	6e-05	7.46703
62	3875.4	97.54	3.9356	0.00474	3.93086					62	3970.73	99.94	7.45535	0.00062	7.45473
63	3970.09	99.93	3.41432	0.00976	3.40456					63	3973	100	7.45735	0.00053	7.45682
64	3943.55	99.26	3.053	0.02037	3.03263					64	3970.73	99.94	7.43684	0.00044	7.4364
65	3917.75	98.61	3.7129	0.01997	3.69293					65	3972.67	99.99	7.46207	0.00047	7.4616
66	3971.52	99.96	3.4307	0.02129	3.40941					66	3870.06	97.41	7.37437	0.0223	7.35207
67	3960.09	99.67	3.36261	0.02058	3.34203					67	3970.09	99.93	7.46578	0.00032	7.46546
68	3971.38	99.96	4.27891	0.00082	4.27809					68	3949.23	99.4	7.45658	0.02022	7.43636
69	3969.76	99.92	4.12145	0.0034	4.11805					69	3949.41	99.41	7.472	0.00013	7.47187
70	3901.24	98.19	3.27944	0.02103	3.25841					70	3968.8	99.89	7.46164	0.00016	7.46148
71	3959.57	99.66	4.1597	0.01194	4.14776					71	3966.56	99.84	7.46069	0.01957	7.44112
72	3940.44	99.18	3.85978	0.01861	3.84117					72	3971.46	99.96	7.44158	0.00316	7.43842
73	3972.5	99.99	3.88645	0.02003	3.86642					73	3973	100	7.42935	0.00035	7.429
74	3968.88	99.9	3.15343	0.00318	3.15025					74	3967.18	99.85	7.44995	0.0004	7.44955
75	3965.24	99.8	3.53464	0.0189	3.51574					75	3963.19	99.75	7.46323	0.00026	7.46297
76	3948.72	99.39	4.02493	0.02223	4.0027					76	3972.03	99.98	7.44668	0.00042	7.44626
77	3960.72	99.69	3.26361	0.00919	3.25442					77	3970.41	99.93	7.45542	0.00025	7.45517
78	3905.79	98.31	4.29826	0.01687	4.28139					78	3964.92	99.8	7.44833	0.00036	7.44797
79	3956.19	99.58	3.76625	0.01473	3.75152					79	3972.67	99.99	7.46759	0.00018	7.46741
80	3972.5	99.99	3.79092	0.01646	3.77446					80	3972.5	99.99	7.46964	0.01961	7.45003
81	3970.95	99.95	2.13252	0.01843	2.11409					81	3961.68	99.71	7.46843	7e-05	7.46836
82	3971.46	99.96	3.41974	0.00324	3.4165					82	3972.67	99.99	7.46578	0.00019	7.46559
83	3919.12	98.64	3.24888	0.01622	3.23266					83	3972.35	99.98	7.36722	0.0072	7.36002
84	3968.36	99.88	3.22583	0.01858	3.20725					84	3970.73	99.94	7.46603	1e-05	7.46602
85	3970.41	99.93	3.83499	0.0168	3.81819					85	3973.01	100	7.46723	0.00016	7.46707
86	3961.36	99.71	3.68942	0.01941	3.67001					86	3969.12	99.9	7.4712	0.00068	7.47052
87	3966.88	99.85	3.45121	0.01879	3.43242					87	3965.78	99.82	7.46398	0.00124	7.46274
88	3963.19	99.75	4.07359	0.0099	4.06369					88	3972.35	99.98	7.46773	5e-05	7.46768
89	3972.67	99.99	3.74725	0.00844	3.73881					89	3961.07	99.7	7.42678	0.01814	7.40864
90	3971.98	99.97	2.86425	0.02125	2.843					90	3968.36	99.88	7.35309	0.01875	7.33434
91	3970.41	99.93	3.9217	0.01344	3.90826					91	3932.92	98.99	7.46858	3e-05	7.46855
92	3972.67	99.99	3.79542	0.00866	3.78676					92	3957.28	99.6	7.46322	0.01967	7.44355
93	3972.35	99.98	3.22623	0.00324	3.22299					93	3968.88	99.9	7.44711	0.00024	7.44687
94	3972.03	99.98	3.66333	0.01856	3.64477					94	3972.67	99.99	7.468	7e-05	7.46793
95	3908	98.36	3.721	0.01975	3.70125					95	3938.38	99.13	7.46723	0.02035	7.44688
96	3941.48	99.21	3.56019	0.0193	3.54089					96	3972.03	99.98	7.46266	0.00023	7.46243
97	3943.55	99.26	3.91228	0.01631	3.89597					97	3968.5	99.89	7.41964	0.0196	7.40004
98	3956.51	99.58	2.93856	0.00911	2.92945					98	3962.67	99.74	7.47227	0.01865	7.45362
99	3951.76	99.47	2.64023	0.01401	2.62622					99	3938.09	99.12	7.45821	0.00052	7.45769
100	3969.47	99.91	3.74762	0.01861	3.72901					100	3968.36	99.88	7.46325	3e-05	7.46322
101	3935.83	99.06	3.30189	0.01691	3.28498					101	3972.35	99.98	7.4628	0.00046	7.46234
102	3971.98	99.97	3.18029	0.0126	3.16769					102	3965.78	99.82	7.4682	0.00015	7.46805
103	3972.03	99.98	3.0905	0.01886	3.07164					103	3962.66	99.74	7.46037	0.0004	7.45997
104	3954.9	99.54	2.58329	0.01866	2.56463					104	3970.73	99.94	7.46573	2e-05	7.46571
105	3964.74	99.79	3.88768	0.00113	3.88655					105	3967.2	99.85	7.46737	0.01913	7.44824
106	3971.46	99.96	3.14156	0.01715	3.12441					106	3972.67	99.99	7.4649	0.00017	7.46473
107	3969.12	99.9	3.89955	0.01535	3.8842					107	3956.99	99.6	7.46798	0.00012	7.46786
108	3971.85	99.97	4.16149	0.02046	4.14103					108	3968.47	99.89	7.42694	0.00025	7.42669
109	3971.46	99.96	3.78093	0.01803	3.7629					109	3961.64	99.71	7.46715	0.01984	7.44731
110	3947.68	99.36	3.61498	0.01194	3.60304					110	3972.35	99.98	7.46258	0.00031	7.46227
111	3972.5	99.99	3.29411	0.01752	3.27659					111	3973.01	100	7.45985	3e-05	7.45982
112	3966.88	99.85	2.46324	0.01688	2.44636					112	3955.95	99.57	7.44684	0.00047	7.44637
113	3958.6	99.64	3.52404	0.02084	3.5032					113	3972.67	99.99	7.38153	6e-05	7.38147
114	3956.99	99.6	4.26221	0.02104	4.24117					114	3970.43	99.94	7.44749	0.00264	7.44485
115	3960.53	99.69	3.50875	0.0188	3.48995					115	3972.67	99.99	7.45084	0.00018	7.45066
116	3971.46	99.96	3.85013	0.01784	3.83229					116	3962.16	99.73	7.4499	0.00019	7.44971
117	3955.95	99.57	3.67055	0.01815	3.6524					117	3971.98	99.97	7.44665	0.00027	7.44638
118	3951.67	99.46	3.56053	0.01791	3.54262					118	3966.86	99.85	7.45988	4e-05	7.45984
119	3963.3	99.76	2.77219	0.01903	2.75316					119	3959.05	99.65	7.46497	0.00022	7.46475
120	3970.09	99.93	3.57146	0.01118	3.56028					120	3966.53	99.84	7.46526	0.00022	7.46504
121	3972.67	99.99	3.38083	0.00908	3.37175					121	3966.86	99.85	7.46364	0.00028	7.46336
122	3960.83	99.69	4.32133	0.01805	4.30328					122	3964.74	99.79	7.46652	0.02073	7.44579
123	3971.98	99.97	3.55803	0.01773	3.5403					123	3968.36	99.88	7.46873	0.00039	7.46834
124	3967.18	99.85	4.43138	0.00921	4.42217					124	3968.15	99.88	7.45614	0.00029	7.45585
125	3971.46	99.96	3.47061	0.01331	3.4573					125	3969.14	99.9	7.46427	0.0161	7.44817
126	3963.3	99.76	3.3162	0.00296	3.31324					126	3964.22	99.78	7.40961	0.00301	7.4066
127	3944.06	99.27	3.81989	0.01953	3.80036					127	3940.31	99.18	7.46283	0.02232	7.44051
128	3968.36	99.88	4.25863	0.01821	4.24042					128	3971.46	99.96	7.42177	0.0001	7.42167
129	3970.41	99.93	3.19549	0.01831	3.17718					129	3968.82	99.89	7.46268	0.01733	7.44535
130	3957.6	99.61	3.13222	0.016	3.11622					130	3968.36	99.88	7.45209	0.01658	7.43551
131	3971.7	99.97	3.59936	0.0186	3.58076					131	3971.98	99.97	7.4517	0.00071	7.45099
132	3970.41	99.93	3.55979	0.01167	3.54812					132	3970.95	99.95	7.46157	4e-05	7.46153
133	3972.03	99.98	3.58821	0.01984	3.56837					133	3966.53	99.84	7.46816	0.00011	7.46805
134	3973.01	100	4.17293	0.00322	4.16971					134	3969.12	99.9	7.4525	0.00038	7.45212
135	3966.86	99.85	4.32783	0.01731	4.31052					135	3970.41	99.93	7.42541	3e-05	7.42538
136	3969.44	99.91	2.66096	0.00496	2.656					136	3962.67	99.74	7.45704	0.0011	7.45594
137	3940.96	99.19	3.76749	0.01608	3.75141					137	3961.64	99.71	7.41121	0.00013	7.41108
138	3959.05	99.65	3.29993	0.01757	3.28236					138	3970.43	99.94	7.46954	4e-05	7.4695
139	3967.33	99.86	3.7904	0.0036	3.7868					139	3970.43	99.94	7.45967	0.01576	7.44391
140	3931.65	98.96	3.9358	0.00593	3.92987					140	3968.36	99.88	7.47105	0.01999	7.45106
141	3970.41	99.93	2.8069	0.0205	2.7864					141	3971.06	99.95	7.46523	0.00027	7.46496
142	3973	100	2.92348	0.01836	2.90512					142	3972.67	99.99	7.45696	0.00011	7.45685
143	3904.13	98.27	2.76511	0.02004	2.74507					143	3971.38	99.96	7.46444	0.00047	7.46397
144	3917.45	98.6	4.20805	0.01779	4.19026					144	3966.53	99.84	7.38289	0.01132	7.37157
145	3961.68	99.71	3.4244	0.00812	3.41628					145	3970.95	99.95	7.46746	0.00017	7.46729
146	3972.67	99.99	3.26277	0.01688	3.24589					146	3920.98	98.69	7.47119	0.01506	7.45613
147	3963.19	99.75	3.12084	0.0195	3.10134					147	3965.78	99.82	7.41723	7e-05	7.41716
148	3949.75	99.41	3.42378	0.01576	3.40802					148	3972.67	99.99	7.46589	0.00078	7.46511
149	3964.59	99.79	2.83009	0.02088	2.80921					149	3949.23	99.4	7.45819	0.01861	7.43958
150	3973	100	3.32739	0.0206	3.30679					150	3972.35	99.98	7.45749	5e-05	7.45744
151	3949.41	99.41	3.89334	0.01873	3.87461					151	3972.35	99.98	7.46431	0.00037	7.46394
152	3968.36	99.88	2.9367	0.0247	2.912					152	3920.32	98.67	7.46183	0.00046	7.46137
153	3946.13	99.32	3.89466	0.02044	3.87422					153	3972.03	99.98	7.46779	8e-05	7.46771
154	3970.41	99.93	3.97943	0.01933	3.9601					154	3971.98	99.97	7.47061	0.00014	7.47047
155	3949.75	99.41	3.23018	0.0202	3.20998					155	3970.41	99.93	7.4629	0.0002	7.4627
156	3973.01	100	3.71488	0.02207	3.69281					156	3969.26	99.91	7.45899	0.02333	7.43566
157	3958.57	99.64	3.48946	0.0212	3.46826					157	3962.66	99.74	7.46866	7e-05	7.46859
158	3969.39	99.91	4.21929	0.02086	4.19843					158	3950.27	99.43	7.41852	0.02302	7.3955
159	3969.91	99.92	3.23658	0.01893	3.21765					159	3972.67	99.99	7.46095	9e-05	7.46086
160	3971.46	99.96	3.49007	0.01958	3.47049					160	3970.09	99.93	7.45843	0.00013	7.4583
161	3963.19	99.75	3.66008	0.02044	3.63964					161	3971.85	99.97	7.43645	0.01498	7.42147
162	3959.05	99.65	3.50318	0.02107	3.48211					162	3972.67	99.99	7.46778	8e-05	7.4677
163	3925.97	98.82	4.22356	0.02303	4.20053					163	3965.24	99.8	7.46181	0.00019	7.46162
164	3953.4	99.51	3.45363	0.02129	3.43234					164	3968.47	99.89	7.44797	4e-05	7.44793
165	3971.46	99.96	2.84319	0.01797	2.82522					165	3969.47	99.91	7.44987	0.01783	7.43204
166	3971.46	99.96	3.29418	0.01822	3.27596					166	3960.74	99.69	7.35355	0.01746	7.33609
167	3962.16	99.73	3.9807	0.01691	3.96379					167	3970.09	99.93	7.46629	0.00017	7.46612
168	3933.2	99	3.48138	0.01489	3.46649					168	3953.37	99.51	7.46709	0.01841	7.44868
169	3973.01	100	3.23935	0.01712	3.22223					169	3971.46	99.96	7.44928	0.02032	7.42896
170	3950.27	99.43	3.71609	0.01131	3.70478					170	3970.41	99.93	7.45758	9e-05	7.45749
171	3961.12	99.7	2.99487	0.01864	2.97623					171	3968.36	99.88	7.46697	3e-05	7.46694
172	3973.01	100	3.42631	0.02094	3.40537					172	3971.98	99.97	7.4677	0.02001	7.44769
173	3973	100	3.21871	0.00971	3.209					173	3966.29	99.83	7.46741	4e-05	7.46737
174	3922.6	98.73	3.68286	0.01993	3.66293					174	3972.03	99.98	7.47086	0.00014	7.47072
175	3968.47	99.89	3.39825	0.01992	3.37833					175	3953.89	99.52	7.45473	0.00014	7.45459
176	3967.33	99.86	4.17639	0.02158	4.15481					176	3972.35	99.98	7.46788	0.00023	7.46765
177	3956.99	99.6	3.50476	0.00901	3.49575					177	3970.41	99.93	7.45502	4e-05	7.45498
178	3972.67	99.99	3.81144	0.01895	3.79249					178	3955.95	99.57	7.44708	0.01421	7.43287
179	3942.39	99.23	3.85753	0.0197	3.83783					179	3970.95	99.95	7.40583	0.00899	7.39684
180	3973	100	3.66615	0.00371	3.66244					180	3968.8	99.89	7.46787	4e-05	7.46783
181	3964.22	99.78	4.13761	0.01789	4.11972					181	3969.12	99.9	7.46477	0.00012	7.46465
182	3961.68	99.71	3.48481	0.00614	3.47867					182	3962.98	99.75	7.43679	3e-05	7.43676
183	3953.37	99.51	4.1504	0.017	4.1334					183	3945.94	99.32	7.41638	0.02193	7.39445
184	3965.26	99.8	3.98426	0.01734	3.96692					184	3954.92	99.54	7.46781	0.01994	7.44787
185	3964.22	99.78	3.13013	0.02233	3.1078					185	3968.88	99.9	7.46306	0.00023	7.46283
186	3972.35	99.98	2.91909	0.0183	2.90079					186	3941.56	99.21	7.47273	0.02167	7.45106
187	3960.09	99.67	3.52511	0.01872	3.50639					187	3958.54	99.64	7.37623	0.02077	7.35546
188	3962.45	99.73	4.02448	0.01718	4.0073					188	3969.39	99.91	7.46246	0.00046	7.462
189	3972.67	99.99	3.52414	0.00675	3.51739					189	3952.64	99.49	7.46749	0.00027	7.46722
190	3952.33	99.48	3.32889	0.01975	3.30914					190	3969.39	99.91	7.44737	0.01676	7.43061
191	3971.98	99.97	3.97582	0.00439	3.97143					191	3949.23	99.4	7.46799	0.02007	7.44792
192	3948.2	99.38	3.73244	0.02061	3.71183					192	3959.57	99.66	7.46779	7e-05	7.46772
193	3943.03	99.25	3.42019	0.01849	3.4017					193	3971.98	99.97	7.45495	0.00011	7.45484
194	3953.37	99.51	3.84426	0.01886	3.8254					194	3970.09	99.93	7.44209	5e-05	7.44204
195	3971.46	99.96	3.89149	0.0175	3.87399					195	3968.36	99.88	7.4695	8e-05	7.46942
196	3962.77	99.74	3.89298	0.01457	3.87841					196	3959.1	99.65	7.46078	0.00018	7.4606
197	3968.15	99.88	2.4295	0.01371	2.41579					197	3906.32	98.32	7.45939	0.01885	7.44054
198	3947.88	99.37	3.70673	0.01436	3.69237					198	3968.88	99.9	7.46885	0.0001	7.46875
199	3971.06	99.95	4.08624	0.00865	4.07759					199	3966.53	99.84	7.47237	6e-05	7.47231
200	3967.18	99.85	3.77138	0.0048	3.76658					200	3957.6	99.61	7.45374	0.01937	7.43437

## Sheet: 04_ACOA_Seeds(75)
Fast Converegnce Exp							Fast Converegnce Exp			Slow Converegnce Exp							Slow Converegnce Exp
#	CBLF	Quality	Taumax	Taumin	DeltaTauminmax		Global Optimal Solution =	3973.01		#	CBLF	Quality	Taumax	Taumin	DeltaTauminmax		Global Optimal Solution =	3973.01
1	3968.36	99.88	4.37576	0.01697	4.35879		Minimum Optimal Solution =	3902.69		1	3968.36	99.88	7.45957	0.0002	7.45937		Minimum Optimal Solution =	3873.89
2	3970.09	99.93	4.10209	0.00696	4.09513		Mean of Optimal Solution =	3963.7		2	3931.95	98.97	7.47159	9e-05	7.4715		Mean of Optimal Solution =	3959.17
3	3968.47	99.89	3.6498	0.01587	3.63393		Median of Optimal Solution =	3963.7		3	3953.89	99.52	7.37199	0.00251	7.36948		Median of Optimal Solution =	3959.17
4	3968.8	99.89	3.16308	0.01773	3.14535		Solution Standrad Deviation =	12.9359		4	3972.35	99.98	7.46731	9e-05	7.46722		Solution Standrad Deviation =	18.1958
5	3952.48	99.48	3.01453	0.01828	2.99625		Average Price =	18.99		5	3943.91	99.27	7.461	6e-05	7.46094		Average Price =	65.72
6	3902.69	98.23	3.41487	0.01985	3.39502		Relability =	45		6	3933.2	99	7.46668	0.0204	7.44628		Relability =	37.5
7	3956.47	99.58	1.73431	0.01212	1.72219		Normalized Price =	42.2		7	3873.91	97.51	7.46504	0.0185	7.44654		Normalized Price =	175.253
8	3964.22	99.78	3.76619	0.01989	3.7463		Average Solution Quality =	99.7658		8	3887.7	97.85	7.39457	0.02165	7.37292		Average Solution Quality =	99.6515
9	3968.15	99.88	3.83013	0.01799	3.81214		Average FDC =	-125.061		9	3914.5	98.53	7.4544	8e-05	7.45432		Average FDC =	-46.3346
10	3968.36	99.88	3.39056	0.01938	3.37118		Correlation Coefficent =	-0.79592		10	3971.46	99.96	7.34254	0.01588	7.32666		Correlation Coefficent =	-0.84236
11	3968.36	99.88	3.63292	0.02211	3.61081		Solution Robustness =	306.411		11	3970.95	99.95	7.46924	0.01881	7.45043		Solution Robustness =	217.587
12	3954.4	99.53	4.05504	0.01989	4.03515		Performance Rate =	0.023697		12	3962.98	99.75	7.46678	7e-05	7.46671		Performance Rate =	0.005706
13	3959.57	99.66	3.7798	0.01717	3.76263		Average Elapsed Time =	0.86277		13	3966.56	99.84	7.45893	0.01943	7.4395		Average Elapsed Time =	2.9714
14	3970.73	99.94	4.12947	0.01598	4.11349					14	3969.12	99.9	7.44628	0.00039	7.44589
15	3972.5	99.99	3.99916	0.01805	3.98111					15	3970.73	99.94	7.46596	0.00025	7.46571
16	3964.74	99.79	3.682	0.02022	3.66178					16	3957.28	99.6	7.47059	0.02097	7.44962
17	3968.36	99.88	3.15772	0.01969	3.13803					17	3962.16	99.73	7.45751	0.0002	7.45731
18	3972.5	99.99	4.0097	0.01601	3.99369					18	3969.91	99.92	7.45381	0.00024	7.45357
19	3964.74	99.79	2.8497	0.01789	2.83181					19	3973.01	100	7.46177	7e-05	7.4617
20	3972.67	99.99	4.14295	0.01583	4.12712					20	3972.03	99.98	7.43727	6e-05	7.43721
21	3967.97	99.87	3.52862	0.01786	3.51076					21	3968.36	99.88	7.43904	0.018	7.42104
22	3966.21	99.83	2.71757	0.00602	2.71155					22	3972.5	99.99	7.45541	0.0006	7.45481
23	3963.19	99.75	3.8997	0.00092	3.89878					23	3945.23	99.3	7.47159	0.02016	7.45143
24	3959.42	99.66	2.80511	0.02071	2.7844					24	3972.67	99.99	7.44522	0.00033	7.44489
25	3971.98	99.97	2.76205	0.01705	2.745					25	3968.36	99.88	7.44611	0.00448	7.44163
26	3973	100	3.65006	0.00404	3.64602					26	3963.3	99.76	7.4702	9e-05	7.47011
27	3969.26	99.91	2.9824	0.02262	2.95978					27	3949.82	99.42	7.42818	0.02121	7.40697
28	3960.09	99.67	2.92489	0.02064	2.90425					28	3972.5	99.99	7.47104	0.01762	7.45342
29	3972.5	99.99	3.50394	0.01086	3.49308					29	3924.93	98.79	7.46133	0.01719	7.44414
30	3966.86	99.85	3.27046	0.01882	3.25164					30	3971.46	99.96	7.38205	2e-05	7.38203
31	3952.41	99.48	3.93996	0.02131	3.91865					31	3941.92	99.22	7.46348	0.01934	7.44414
32	3966.21	99.83	3.48579	0.00324	3.48255					32	3966.86	99.85	7.42867	2e-05	7.42865
33	3953.28	99.5	3.92825	0.01977	3.90848					33	3968.88	99.9	7.46457	0.01951	7.44506
34	3970.41	99.93	1.71089	0.02183	1.68906					34	3969.44	99.91	7.46791	4e-05	7.46787
35	3968.88	99.9	3.09528	0.01388	3.0814					35	3939.93	99.17	7.46388	0.01998	7.4439
36	3966.86	99.85	3.75754	0.02236	3.73518					36	3972.03	99.98	7.44608	0.00068	7.4454
37	3971.98	99.97	3.27684	0.01627	3.26057					37	3936.31	99.08	7.47163	0.02189	7.44974
38	3971.98	99.97	3.00648	0.02115	2.98533					38	3947.14	99.35	7.45562	0.0003	7.45532
39	3961.36	99.71	4.19971	0.01648	4.18323					39	3903.22	98.24	7.46954	0.01956	7.44998
40	3935.79	99.06	3.33396	0.02304	3.31092					40	3909.42	98.4	7.43773	0.01919	7.41854
41	3970.09	99.93	3.97918	0.00898	3.9702					41	3972.67	99.99	7.4671	9e-05	7.46701
42	3970.41	99.93	3.38119	0.00996	3.37123					42	3971.98	99.97	7.39517	0.00166	7.39351
43	3962.98	99.75	3.74698	0.01709	3.72989					43	3953.7	99.51	7.46013	0.01796	7.44217
44	3970.41	99.93	3.93027	0.02116	3.90911					44	3972.03	99.98	7.46252	0.0007	7.46182
45	3935.27	99.05	3.83199	0.01047	3.82152					45	3971.46	99.96	7.45764	0.00074	7.4569
46	3970.41	99.93	3.46097	0.0193	3.44167					46	3952.85	99.49	7.46868	0.01735	7.45133
47	3972.67	99.99	3.46019	0.00936	3.45083					47	3967.84	99.87	7.46181	0.00043	7.46138
48	3930.62	98.93	3.99018	0.01628	3.9739					48	3953.89	99.52	7.46517	0.00016	7.46501
49	3970.43	99.94	3.19372	0.01739	3.17633					49	3960.09	99.67	7.47402	8e-05	7.47394
50	3972.35	99.98	3.9562	0.01921	3.93699					50	3968.8	99.89	7.37948	3e-05	7.37945
51	3973	100	4.08108	0.00067	4.08041					51	3945.97	99.32	7.45546	0.01791	7.43755
52	3908.33	98.37	3.50604	0.01966	3.48638					52	3961.83	99.72	7.45046	0.02064	7.42982
53	3939.93	99.17	3.59524	0.01857	3.57667					53	3964.92	99.8	7.43465	2e-05	7.43463
54	3959.54	99.66	4.14272	0.01939	4.12333					54	3959.1	99.65	7.46731	0.00012	7.46719
55	3971.98	99.97	3.68918	0.01719	3.67199					55	3972.35	99.98	7.46617	0.00014	7.46603
56	3970.88	99.95	3.24204	0.01878	3.22326					56	3967.2	99.85	7.47032	0.01708	7.45324
57	3968.88	99.9	3.47194	0.01218	3.45976					57	3970.73	99.94	7.46635	7e-05	7.46628
58	3968.82	99.89	4.03746	0.02063	4.01683					58	3972.03	99.98	7.46673	0.00015	7.46658
59	3950.27	99.43	3.04797	0.01632	3.03165					59	3963.3	99.76	7.45713	0.00041	7.45672
60	3966.03	99.82	3.89765	0.01908	3.87857					60	3972.67	99.99	7.46549	0.00052	7.46497
61	3972.03	99.98	3.47811	0.01781	3.4603					61	3961.5	99.71	7.468	0.01884	7.44916
62	3966.53	99.84	3.17647	0.01797	3.1585					62	3933.89	99.02	7.46677	0.00016	7.46661
63	3972.03	99.98	4.01235	0.01985	3.9925					63	3972.35	99.98	7.46594	3e-05	7.46591
64	3964.09	99.78	3.67918	0.02146	3.65772					64	3958.13	99.63	7.46069	5e-05	7.46064
65	3972.5	99.99	3.55811	0.01939	3.53872					65	3970.41	99.93	7.43806	7e-05	7.43799
66	3972.67	99.99	3.24844	0.01234	3.2361					66	3929.59	98.91	7.46728	0.00058	7.4667
67	3972.67	99.99	4.10073	0.0027	4.09803					67	3971.98	99.97	7.463	2e-05	7.46298
68	3963.62	99.76	2.85144	0.01841	2.83303					68	3972.5	99.99	7.33809	0.01701	7.32108
69	3949.23	99.4	3.41682	0.0205	3.39632					69	3967.64	99.86	7.47061	0.02067	7.44994
70	3938.42	99.13	4.0765	0.01939	4.05711					70	3972.03	99.98	7.45812	0.00391	7.45421
71	3965.26	99.8	3.67246	0.016	3.65646					71	3969.91	99.92	7.4632	0.01827	7.44493
72	3953.37	99.51	4.04517	0.01792	4.02725					72	3972.5	99.99	7.46624	0.01837	7.44787
73	3973	100	3.61121	0.01421	3.597					73	3973	100	7.46285	2e-05	7.46283
74	3971.98	99.97	3.1081	0.01919	3.08891					74	3964.92	99.8	7.461	0.00039	7.46061
75	3971.98	99.97	3.74615	0.01849	3.72766					75	3971.98	99.97	7.47045	0.00052	7.46993
76	3970.88	99.95	3.76484	0.01568	3.74916					76	3953.37	99.51	7.45494	0.00046	7.45448
77	3959.57	99.66	3.62993	0.01495	3.61498					77	3970.73	99.94	7.46083	0.00031	7.46052
78	3964.59	99.79	3.09824	0.01751	3.08073					78	3972.5	99.99	7.46704	8e-05	7.46696
79	3955.87	99.57	3.55671	0.01713	3.53958					79	3972.67	99.99	7.46495	0.0002	7.46475
80	3955.95	99.57	3.27711	0.02216	3.25495					80	3955.22	99.55	7.46968	9e-05	7.46959
81	3972.5	99.99	2.75336	0.02051	2.73285					81	3873.89	97.51	7.45249	0.01941	7.43308
82	3973	100	3.2242	0.01869	3.20551					82	3971.06	99.95	7.4588	0.00048	7.45832
83	3967.33	99.86	3.38708	0.01971	3.36737					83	3968.15	99.88	7.47095	3e-05	7.47092
84	3972.03	99.98	3.18978	0.0036	3.18618					84	3970.73	99.94	7.46805	0.00022	7.46783
85	3972.5	99.99	2.40789	0.00867	2.39922					85	3963.44	99.76	7.45845	0.0176	7.44085
86	3972.35	99.98	3.07397	0.01431	3.05966					86	3968.36	99.88	7.46503	0.01975	7.44528
87	3963.3	99.76	3.93571	0.01203	3.92368					87	3963.19	99.75	7.46959	0.00017	7.46942
88	3922.35	98.72	3.84527	0.01849	3.82678					88	3972.5	99.99	7.46163	0.00012	7.46151
89	3960.97	99.7	3.67301	0.01872	3.65429					89	3964.74	99.79	7.44242	0.00036	7.44206
90	3967.33	99.86	3.99023	0.01597	3.97426					90	3953.4	99.51	7.45312	0.02044	7.43268
91	3968.88	99.9	3.42932	0.01973	3.40959					91	3954.02	99.52	7.47016	0.01692	7.45324
92	3971.98	99.97	3.67074	0.01379	3.65695					92	3964.92	99.8	7.46842	8e-05	7.46834
93	3967.84	99.87	2.69424	0.01831	2.67593					93	3953.89	99.52	7.46692	0.00028	7.46664
94	3970.41	99.93	3.73267	0.01964	3.71303					94	3971.98	99.97	7.45144	3e-05	7.45141
95	3970.09	99.93	3.54785	0.0137	3.53415					95	3965.24	99.8	7.43799	0.00264	7.43535
96	3963.19	99.75	3.65784	0.00402	3.65382					96	3960.53	99.69	7.47181	0.02055	7.45126
97	3971.06	99.95	3.20107	0.0177	3.18337					97	3971.46	99.96	7.4642	1e-05	7.46419
98	3937.27	99.1	3.95485	0.01923	3.93562					98	3972.67	99.99	7.46174	4e-05	7.4617
99	3972.35	99.98	3.7492	0.00786	3.74134					99	3968.8	99.89	7.44533	9e-05	7.44524
100	3972.67	99.99	3.05217	0.0212	3.03097					100	3973	100	7.43264	6e-05	7.43258
101	3968.29	99.88	3.62885	0.01759	3.61126					101	3967.53	99.86	7.47053	0.0181	7.45243
102	3957.48	99.61	2.75583	0.00783	2.748					102	3915.56	98.55	7.47026	0.02091	7.44935
103	3970.09	99.93	4.14573	0.01485	4.13088					103	3949.75	99.41	7.40361	0.01891	7.3847
104	3970.95	99.95	3.0169	0.01891	2.99799					104	3952.96	99.5	7.45963	0.00183	7.4578
105	3972.67	99.99	3.88043	0.02213	3.8583					105	3968.88	99.9	7.46513	7e-05	7.46506
106	3968.88	99.9	4.09089	0.02114	4.06975					106	3970.41	99.93	7.45393	0.00101	7.45292
107	3969.12	99.9	3.87004	0.01881	3.85123					107	3951.34	99.45	7.41727	0.00045	7.41682
108	3965.26	99.8	3.4457	0.01085	3.43485					108	3947.79	99.37	7.46582	0.00015	7.46567
109	3955.95	99.57	3.56727	0.02109	3.54618					109	3969.12	99.9	7.46341	0.00022	7.46319
110	3969.76	99.92	3.60859	0.01821	3.59038					110	3926.47	98.83	7.46757	0.01959	7.44798
111	3967.18	99.85	3.65966	0.01884	3.64082					111	3961.36	99.71	7.4677	0.00036	7.46734
112	3967.18	99.85	2.53081	0.01939	2.51142					112	3932.37	98.98	7.42891	0.02048	7.40843
113	3970.41	99.93	3.26212	0.01642	3.2457					113	3931.75	98.96	7.46338	0.01715	7.44623
114	3972.49	99.99	3.55038	0.01846	3.53192					114	3961.07	99.7	7.45936	0.01869	7.44067
115	3949.75	99.41	3.42772	0.01957	3.40815					115	3971.06	99.95	7.45934	0.0001	7.45924
116	3946.5	99.33	3.61871	0.01801	3.6007					116	3947.16	99.35	7.46082	0.00011	7.46071
117	3963.19	99.75	4.26497	0.01875	4.24622					117	3972.35	99.98	7.46329	0.00092	7.46237
118	3966.53	99.84	3.98121	0.00881	3.9724					118	3970.73	99.94	7.45578	0.0004	7.45538
119	3968.88	99.9	3.85438	0.00569	3.84869					119	3972.67	99.99	7.46241	9e-05	7.46232
120	3933.72	99.01	4.30456	0.01817	4.28639					120	3972.67	99.99	7.46332	0.00092	7.4624
121	3971.46	99.96	3.94195	0.0049	3.93705					121	3973	100	7.45806	0.00033	7.45773
122	3971.46	99.96	3.38715	0.01816	3.36899					122	3962.98	99.75	7.44956	3e-05	7.44953
123	3969.39	99.91	3.00352	0.01243	2.99109					123	3966.53	99.84	7.46407	0.00046	7.46361
124	3971.85	99.97	3.82749	0.01859	3.8089					124	3945.85	99.32	7.47136	0.00031	7.47105
125	3971.98	99.97	3.91051	0.01662	3.89389					125	3925.45	98.8	7.4716	0.01636	7.45524
126	3938.19	99.12	3.83032	0.01695	3.81337					126	3972.35	99.98	7.46841	0.00016	7.46825
127	3971.98	99.97	3.28357	0.01924	3.26433					127	3941.47	99.21	7.45933	0.01948	7.43985
128	3972.03	99.98	3.39698	0.01484	3.38214					128	3924.42	98.78	7.4596	0.017	7.4426
129	3963.19	99.75	4.15298	0.01772	4.13526					129	3972.35	99.98	7.4525	0.00029	7.45221
130	3968.36	99.88	3.4534	0.01274	3.44066					130	3969.44	99.91	7.47192	0.0003	7.47162
131	3968.88	99.9	3.5392	0.01892	3.52028					131	3949.75	99.41	7.4678	0.01946	7.44834
132	3925.56	98.81	3.39181	0.02094	3.37087					132	3960.83	99.69	7.46809	0.01942	7.44867
133	3972.67	99.99	4.06781	0.01312	4.05469					133	3951.76	99.47	7.45214	0.01719	7.43495
134	3972.5	99.99	3.71108	0.01921	3.69187					134	3932.28	98.97	7.34191	0.00036	7.34155
135	3968.36	99.88	3.36371	0.0218	3.34191					135	3971.46	99.96	7.46527	0.00038	7.46489
136	3971.46	99.96	3.46714	0.01584	3.4513					136	3958.25	99.63	7.46643	0.01955	7.44688
137	3967.5	99.86	3.90257	0.01016	3.89241					137	3971.46	99.96	7.40156	0.00302	7.39854
138	3971.98	99.97	3.70103	0.01795	3.68308					138	3966.56	99.84	7.46004	0.01839	7.44165
139	3973	100	4.20081	0.01851	4.1823					139	3970.41	99.93	7.33636	2e-05	7.33634
140	3968.88	99.9	3.41382	0.02176	3.39206					140	3968.88	99.9	7.45068	0.00014	7.45054
141	3967.2	99.85	2.48854	0.02114	2.4674					141	3970.09	99.93	7.46652	0.00032	7.4662
142	3972.35	99.98	3.78038	0.01898	3.7614					142	3949.08	99.4	7.45125	5e-05	7.4512
143	3961.64	99.71	3.38057	0.01984	3.36073					143	3971.06	99.95	7.44006	0.00362	7.43644
144	3970.09	99.93	3.64336	0.02039	3.62297					144	3972.67	99.99	7.46378	0.00061	7.46317
145	3946.65	99.34	4.13003	0.02141	4.10862					145	3972.35	99.98	7.46967	4e-05	7.46963
146	3961.04	99.7	3.09339	0.01135	3.08204					146	3964.74	99.79	7.4623	0.00054	7.46176
147	3972.17	99.98	3.69173	0.01582	3.67591					147	3966.53	99.84	7.44283	6e-05	7.44277
148	3954.92	99.54	3.5615	0.01671	3.54479					148	3945.1	99.3	7.46375	0.01735	7.4464
149	3970.41	99.93	3.37249	0.02003	3.35246					149	3894.79	98.03	7.36543	1e-05	7.36542
150	3968.8	99.89	3.99605	0.01856	3.97749					150	3972.5	99.99	7.40735	0.00461	7.40274
151	3971.06	99.95	3.74146	0.00962	3.73184					151	3958.45	99.63	7.46637	5e-05	7.46632
152	3968.88	99.9	3.04986	0.01874	3.03112					152	3967.53	99.86	7.46399	0.01883	7.44516
153	3969.44	99.91	3.69148	0.01285	3.67863					153	3972.67	99.99	7.46829	0.0004	7.46789
154	3970.09	99.93	4.1437	0.02027	4.12343					154	3972.35	99.98	7.46257	0.00011	7.46246
155	3969.76	99.92	2.15453	0.00401	2.15052					155	3973.01	100	7.41792	0.0007	7.41722
156	3960.72	99.69	4.21004	0.01769	4.19235					156	3950.84	99.44	7.45722	0.01778	7.43944
157	3956.84	99.59	2.4411	0.0172	2.4239					157	3941.65	99.21	7.43624	3e-05	7.43621
158	3973	100	3.26936	0.01591	3.25345					158	3962.67	99.74	7.47129	0.01726	7.45403
159	3938.42	99.13	3.11817	0.01885	3.09932					159	3971.38	99.96	7.46842	0.00047	7.46795
160	3961.12	99.7	3.85744	0.01439	3.84305					160	3969.39	99.91	7.46157	9e-05	7.46148
161	3971.7	99.97	3.65281	0.02025	3.63256					161	3953.7	99.51	7.46125	0.02201	7.43924
162	3970.73	99.94	3.51693	0.01745	3.49948					162	3970.73	99.94	7.46264	3e-05	7.46261
163	3969.14	99.9	3.35348	0.01943	3.33405					163	3967.2	99.85	7.46355	0.0196	7.44395
164	3971.98	99.97	4.17177	0.0216	4.15017					164	3966.53	99.84	7.47127	9e-05	7.47118
165	3965.78	99.82	3.41838	0.01709	3.40129					165	3968.88	99.9	7.45819	0.00076	7.45743
166	3972.67	99.99	3.87631	0.01292	3.86339					166	3955.04	99.55	7.46822	0.01877	7.44945
167	3973	100	3.71115	0.01757	3.69358					167	3962.33	99.73	7.35769	0.01505	7.34264
168	3955.44	99.56	3.38262	0.02089	3.36173					168	3906.54	98.33	7.47559	0.01801	7.45758
169	3972.5	99.99	3.40668	0.02167	3.38501					169	3966.86	99.85	7.46557	8e-05	7.46549
170	3959.57	99.66	4.04434	0.01517	4.02917					170	3968.32	99.88	7.45487	0.01974	7.43513
171	3970.41	99.93	3.71879	0.01496	3.70383					171	3968.88	99.9	7.44148	0.00011	7.44137
172	3972.35	99.98	1.9524	0.0187	1.9337					172	3963.71	99.77	7.4684	4e-05	7.46836
173	3957.95	99.62	3.91461	0.01788	3.89673					173	3970.41	99.93	7.45029	0.00163	7.44866
174	3959.57	99.66	4.12657	0.01227	4.1143					174	3954.69	99.54	7.46201	0.01804	7.44397
175	3973.01	100	3.95204	0.00863	3.94341					175	3961.12	99.7	7.43101	0.02057	7.41044
176	3962.66	99.74	3.55162	0.01708	3.53454					176	3963.71	99.77	7.46682	0.01616	7.45066
177	3966.56	99.84	3.09494	0.01836	3.07658					177	3967.84	99.87	7.46912	0.00037	7.46875
178	3972.5	99.99	2.62248	0.00733	2.61515					178	3969.12	99.9	7.4648	0.0001	7.4647
179	3964.92	99.8	3.79951	0.01829	3.78122					179	3969.91	99.92	7.46889	0.01821	7.45068
180	3906.32	98.32	3.51358	0.01975	3.49383					180	3947.68	99.36	7.46996	0.01497	7.45499
181	3971.46	99.96	3.65964	0.02292	3.63672					181	3972.5	99.99	7.43343	0.00633	7.4271
182	3951.99	99.47	3.37636	0.01823	3.35813					182	3972.35	99.98	7.42419	0.0036	7.42059
183	3968.88	99.9	1.86913	0.00172	1.86741					183	3966.53	99.84	7.46316	1e-05	7.46315
184	3964.44	99.78	3.50893	0.01782	3.49111					184	3945.2	99.3	7.47046	0.00015	7.47031
185	3970.73	99.94	3.82025	0.00776	3.81249					185	3962.16	99.73	7.4515	0.00016	7.45134
186	3973	100	2.68256	0.01059	2.67197					186	3968.8	99.89	7.40761	0.01078	7.39683
187	3934.49	99.03	3.99662	0.01636	3.98026					187	3968.15	99.88	7.46609	0.00051	7.46558
188	3972.03	99.98	3.26866	0.01652	3.25214					188	3953.89	99.52	7.46672	0.00042	7.4663
189	3962.8	99.74	3.45751	0.01919	3.43832					189	3972.67	99.99	7.46165	0.00042	7.46123
190	3972.03	99.98	3.48613	0.00067	3.48546					190	3950.27	99.43	7.46813	0.00022	7.46791
191	3964.74	99.79	4.05536	0.0203	4.03506					191	3971.06	99.95	7.45503	5e-05	7.45498
192	3972.35	99.98	3.44107	0.01942	3.42165					192	3970.73	99.94	7.45099	0.00013	7.45086
193	3972.67	99.99	3.72046	0.01525	3.70521					193	3968.88	99.9	7.46251	3e-05	7.46248
194	3961.83	99.72	3.5276	0.02087	3.50673					194	3955.87	99.57	7.45774	0.00031	7.45743
195	3972.5	99.99	3.63782	0.02011	3.61771					195	3933.57	99.01	7.47233	0.00033	7.472
196	3926.49	98.83	3.95814	0.0192	3.93894					196	3962.16	99.73	7.46613	0.00028	7.46585
197	3963.19	99.75	3.88923	0.01929	3.86994					197	3949.75	99.41	7.46704	0.01934	7.4477
198	3947.16	99.35	3.77131	0.02051	3.7508					198	3970.41	99.93	7.44582	7e-05	7.44575
199	3972.67	99.99	3.3361	0.01786	3.31824					199	3942	99.22	7.44232	0.02079	7.42153
200	3921.83	98.71	4.19069	0.02034	4.17035					200	3967.18	99.85	7.4669	0.0001	7.4668

## Sheet: 05_ACOA_Seeds(111)
Fast Converegnce Exp							Fast Converegnce Exp			Slow Converegnce Exp							Slow Converegnce Exp
#	CBLF	Quality	Taumax	Taumin	DeltaTauminmax		Global Optimal Solution =	3973.01		#	CBLF	Quality	Taumax	Taumin	DeltaTauminmax		Global Optimal Solution =	3973
1	3970.43	99.94	2.28643	0.00541	2.28102		Minimum Optimal Solution=	3890.29		1	3970.43	99.94	7.42936	4e-05	7.42932		Minimum Optimal Solution =	3879.91
2	3968.36	99.88	3.39758	0.01187	3.38571		Mean of Optimal Solution =	3959.86		2	3969.12	99.9	7.47309	7e-05	7.47302		Mean of Optimal Solution =	3958.71
3	3962.8	99.74	3.63509	0.02142	3.61367		Median of Optimal Solution =	3959.86		3	3973	100	7.46897	9e-05	7.46888		Median of Optimal Solution =	3958.71
4	3971.46	99.96	2.80269	0.0181	2.78459		Solution Standrad Deviation=	17.0261		4	3964.74	99.79	7.47261	0.00013	7.47248		Solution Standrad Deviation =	18.5107
5	3964.74	99.79	3.11816	0.023	3.09516		Average Price =	19.05		5	3968.36	99.88	7.46398	0.0166	7.44738		Average Price =	65.94
6	3972.35	99.98	3.45517	0.01946	3.43571		Relability =	36		6	3966.88	99.85	7.441	0.01784	7.42316		Relability =	36.5
7	3916.76	98.58	2.54737	0.01789	2.52948		Normalized Price =	52.9167		7	3970.41	99.93	7.46535	3e-05	7.46532		Normalized Price =	180.657
8	3970.09	99.93	3.33867	0.00847	3.3302		Average Solution Quality =	99.669		8	3879.91	97.66	7.46024	0.01923	7.44101		Average Solution Quality =	99.64
9	3972.67	99.99	3.37818	0.02161	3.35657		Average FDC =	-125.717		9	3966.68	99.84	7.45029	0.01743	7.43286		Average FDC =	-42.944
10	3968.47	99.89	3.2015	0.01483	3.18667		Correlation Coefficent =	-0.79737		10	3972.35	99.98	7.4498	6e-05	7.44974		Correlation Coefficent =	-0.83492
11	3961.04	99.7	2.5023	0.01202	2.49028		Solution Robustness =	232.576		11	3952.85	99.49	7.43174	0.01897	7.41277		Solution Robustness =	213.86
12	3972.03	99.98	3.26196	0.01758	3.24438		Performance Rate =	0.018898		12	3950.78	99.44	7.45684	0.00035	7.45649		Performance Rate =	0.0055353
13	3973.01	100	3.41412	0.0104	3.40372		Average Elapsed Time =	0.86662		13	3963.71	99.77	7.46671	0.00022	7.46649		Average Elapsed Time =	2.9733
14	3954.92	99.54	3.89607	0.01999	3.87608					14	3970.41	99.93	7.46279	0.00023	7.46256
15	3952.96	99.5	3.25	0.01901	3.23099					15	3958.45	99.63	7.4607	0.00013	7.46057
16	3968.18	99.88	3.47011	0.01661	3.4535					16	3971.85	99.97	7.45277	0.02219	7.43058
17	3961.36	99.71	3.7406	0.01126	3.72934					17	3958.89	99.64	7.46812	0.02021	7.44791
18	3968.36	99.88	3.55861	0.01708	3.54153					18	3973	100	7.42413	1e-05	7.42412
19	3951.67	99.46	3.77228	0.00892	3.76336					19	3957.5	99.61	7.46453	0.00088	7.46365
20	3966.21	99.83	3.50693	0.02086	3.48607					20	3968.88	99.9	7.45745	0.00019	7.45726
21	3943.55	99.26	2.53657	0.01869	2.51788					21	3940.15	99.17	7.4036	0.01969	7.38391
22	3964.27	99.78	4.02613	0.00768	4.01845					22	3959.05	99.65	7.45027	0.01947	7.4308
23	3968.47	99.89	3.44213	0.02243	3.4197					23	3972.35	99.98	7.47099	5e-05	7.47094
24	3966.68	99.84	3.73804	0.01704	3.721					24	3950.78	99.44	7.45869	0.01828	7.44041
25	3968.36	99.88	4.11508	0.02044	4.09464					25	3920.32	98.67	7.46447	7e-05	7.4644
26	3972.35	99.98	2.58084	0.00757	2.57327					26	3938.42	99.13	7.44229	5e-05	7.44224
27	3972.67	99.99	3.42365	0.01706	3.40659					27	3965.24	99.8	7.39357	0.0138	7.37977
28	3963.09	99.75	3.70354	0.01852	3.68502					28	3969.12	99.9	7.46811	0.00028	7.46783
29	3902.7	98.23	3.73032	0.02081	3.70951					29	3968.36	99.88	7.44404	0.01771	7.42633
30	3950.47	99.43	2.69486	0.02055	2.67431					30	3970.95	99.95	7.46055	9e-05	7.46046
31	3901	98.19	3.94814	0.01791	3.93023					31	3953.28	99.5	7.46424	0.00024	7.464
32	3972.5	99.99	3.71356	0.01064	3.70292					32	3963.19	99.75	7.45025	0.00017	7.45008
33	3968.8	99.89	3.25234	0.02196	3.23038					33	3970.09	99.93	7.45991	0.0019	7.45801
34	3964.92	99.8	4.28498	0.00515	4.27983					34	3932.17	98.97	7.4644	0.01946	7.44494
35	3972.35	99.98	2.56385	0.02225	2.5416					35	3972.67	99.99	7.45803	0.00018	7.45785
36	3970.95	99.95	3.90647	0.00664	3.89983					36	3963.3	99.76	7.4455	0.0016	7.4439
37	3958.57	99.64	2.26539	0.0162	2.24919					37	3972.67	99.99	7.46322	0.0003	7.46292
38	3959.1	99.65	3.47979	0.01727	3.46252					38	3969.12	99.9	7.47188	9e-05	7.47179
39	3971.46	99.96	3.96951	0.00927	3.96024					39	3971.46	99.96	7.46515	5e-05	7.4651
40	3961.71	99.72	3.82733	0.01934	3.80799					40	3943.59	99.26	7.46781	0.00011	7.4677
41	3968.36	99.88	3.86675	0.0206	3.84615					41	3967.18	99.85	7.46411	0.00033	7.46378
42	3972.35	99.98	2.21217	0.0161	2.19607					42	3930.62	98.93	7.46283	0.01984	7.44299
43	3898.57	98.13	3.83778	0.01994	3.81784					43	3962.66	99.74	7.47141	0.00023	7.47118
44	3951.43	99.46	3.88982	0.01721	3.87261					44	3970.73	99.94	7.44984	0.00014	7.4497
45	3970.41	99.93	3.07088	0.0036	3.06728					45	3972.67	99.99	7.47001	9e-05	7.46992
46	3959.42	99.66	2.73034	0.02112	2.70922					46	3970.55	99.94	7.43954	0.01782	7.42172
47	3969.76	99.92	4.33017	0.01258	4.31759					47	3951.34	99.45	7.41072	0.00453	7.40619
48	3962.18	99.73	3.25775	0.01642	3.24133					48	3968.8	99.89	7.47449	0.00018	7.47431
49	3952.85	99.49	3.10224	0.01539	3.08685					49	3961.04	99.7	7.45183	0.00035	7.45148
50	3973.01	100	3.85524	0.02282	3.83242					50	3934.66	99.03	7.32839	0.01698	7.31141
51	3968.36	99.88	3.89621	0.01714	3.87907					51	3963.95	99.77	7.42054	0.00607	7.41447
52	3890.3	97.92	3.9454	0.01848	3.92692					52	3942.71	99.24	7.45453	0.01692	7.43761
53	3968.8	99.89	2.63467	0.01391	2.62076					53	3940.96	99.19	7.45351	0.01454	7.43897
54	3972.5	99.99	4.22914	0.01737	4.21177					54	3972.35	99.98	7.45643	0.00073	7.4557
55	3958.78	99.64	3.45806	0.01529	3.44277					55	3937.86	99.12	7.4506	0.00158	7.44902
56	3972.03	99.98	2.95574	0.00208	2.95366					56	3972.67	99.99	7.46276	0.0003	7.46246
57	3930.66	98.93	3.82729	0.01719	3.8101					57	3972.03	99.98	7.44122	9e-05	7.44113
58	3973	100	3.4586	0.00122	3.45738					58	3958.02	99.62	7.45926	0.02102	7.43824
59	3973	100	3.64199	0.01669	3.6253					59	3970.73	99.94	7.45654	0.00014	7.4564
60	3939.34	99.15	3.51836	0.01596	3.5024					60	3958.54	99.64	7.46834	0.01816	7.45018
61	3971.85	99.97	3.84304	0.01809	3.82495					61	3953.28	99.5	7.46131	5e-05	7.46126
62	3962.98	99.75	3.97044	0.01518	3.95526					62	3929.72	98.91	7.47291	0.01659	7.45632
63	3947.82	99.37	3.79914	0.02092	3.77822					63	3972.03	99.98	7.46651	0.0022	7.46431
64	3972.35	99.98	3.84301	0.01642	3.82659					64	3970.41	99.93	7.44824	8e-05	7.44816
65	3963.77	99.77	3.68326	0.01929	3.66397					65	3971.46	99.96	7.47022	0.0002	7.47002
66	3961.64	99.71	4.12425	0.01784	4.10641					66	3959.57	99.66	7.45708	0.00036	7.45672
67	3971.98	99.97	3.28929	0.01546	3.27383					67	3969.39	99.91	7.46272	0.00054	7.46218
68	3959.05	99.65	3.06951	0.01928	3.05023					68	3910.57	98.43	7.46188	0.01849	7.44339
69	3936.31	99.08	3.36607	0.01969	3.34638					69	3966.86	99.85	7.46869	9e-05	7.4686
70	3939.71	99.16	4.17942	0.01818	4.16124					70	3959.05	99.65	7.44591	0.00011	7.4458
71	3968.36	99.88	3.44035	0.004	3.43635					71	3973	100	7.46162	1e-05	7.46161
72	3971.46	99.96	3.41378	0.01729	3.39649					72	3961.64	99.71	7.46479	0.00047	7.46432
73	3931.65	98.96	2.66977	0.02226	2.64751					73	3969.12	99.9	7.44818	0.00013	7.44805
74	3929.59	98.91	2.95962	0.02026	2.93936					74	3920.8	98.69	7.47157	0.01808	7.45349
75	3953.28	99.5	2.10185	0.01799	2.08386					75	3939.41	99.15	7.46715	0.01883	7.44832
76	3970.41	99.93	3.89513	0.017	3.87813					76	3967.84	99.87	7.44982	0.00154	7.44828
77	3908.91	98.39	3.53463	0.02018	3.51445					77	3967.97	99.87	7.4669	0.01507	7.45183
78	3941.48	99.21	2.99029	0.01707	2.97322					78	3965.24	99.8	7.4545	5e-05	7.45445
79	3973	100	3.25723	0.01654	3.24069					79	3967.18	99.85	7.46597	0.00016	7.46581
80	3972.5	99.99	3.82318	0.02156	3.80162					80	3892.36	97.97	7.45762	0.01382	7.4438
81	3913.56	98.5	4.04654	0.0203	4.02624					81	3968.36	99.88	7.46164	0.01822	7.44342
82	3970.43	99.94	2.97327	0.02013	2.95314					82	3958.6	99.64	7.46849	0.01904	7.44945
83	3966.86	99.85	3.50012	0.00573	3.49439					83	3971.46	99.96	7.40767	0.00672	7.40095
84	3970.41	99.93	2.27005	0.01481	2.25524					84	3971.98	99.97	7.46791	0.00012	7.46779
85	3972.67	99.99	3.72987	0.02009	3.70978					85	3971.38	99.96	7.46375	0.00019	7.46356
86	3972.03	99.98	3.8587	0.01752	3.84118					86	3972.35	99.98	7.39115	0.01144	7.37971
87	3966.86	99.85	2.97458	0.0036	2.97098					87	3972.5	99.99	7.44504	0.01753	7.42751
88	3962.16	99.73	3.74166	0.01934	3.72232					88	3968.8	99.89	7.4618	0.00016	7.46164
89	3970.09	99.93	3.76571	0.01851	3.7472					89	3946.17	99.32	7.47151	0.00015	7.47136
90	3967.84	99.87	3.54351	0.01761	3.5259					90	3970.41	99.93	7.46838	0.00018	7.4682
91	3962.67	99.74	4.03092	0.02166	4.00926					91	3967.84	99.87	7.46531	0.02191	7.4434
92	3970.41	99.93	3.82073	0.01785	3.80288					92	3962.16	99.73	7.46399	0.02391	7.44008
93	3962.33	99.73	2.75469	0.01518	2.73951					93	3971.98	99.97	7.40853	0.01739	7.39114
94	3944.23	99.28	4.17206	0.00092	4.17114					94	3970.09	99.93	7.4553	9e-05	7.45521
95	3968.36	99.88	3.37597	0.01585	3.36012					95	3955.95	99.57	7.45908	0.0164	7.44268
96	3949.41	99.41	3.34828	0.01781	3.33047					96	3964.62	99.79	7.46962	0.02001	7.44961
97	3970.73	99.94	3.62428	0.02072	3.60356					97	3956.95	99.6	7.45794	0.02035	7.43759
98	3966.7	99.84	4.08456	0.01581	4.06875					98	3951.34	99.45	7.46245	6e-05	7.46239
99	3959.57	99.66	3.18542	0.02009	3.16533					99	3972.49	99.99	7.4707	0.02102	7.44968
100	3973	100	3.7901	0.02074	3.76936					100	3883.48	97.75	7.42549	3e-05	7.42546
101	3952.96	99.5	3.94258	0.00561	3.93697					101	3968.88	99.9	7.46401	0.00011	7.4639
102	3908.33	98.37	2.62101	0.01713	2.60388					102	3970.09	99.93	7.46863	0.00048	7.46815
103	3955.22	99.55	3.99957	0.01108	3.98849					103	3966.86	99.85	7.40297	7e-05	7.4029
104	3965.26	99.8	3.24026	0.00837	3.23189					104	3949.75	99.41	7.47009	0.0215	7.44859
105	3965.26	99.8	3.11288	0.01989	3.09299					105	3961.68	99.71	7.46586	0.00022	7.46564
106	3963.19	99.75	2.80925	0.02133	2.78792					106	3922.58	98.73	7.46636	0.00025	7.46611
107	3946.64	99.34	3.86392	0.01829	3.84563					107	3945.61	99.31	7.46243	0.0018	7.46063
108	3962.98	99.75	3.32253	0.01201	3.31052					108	3970.41	99.93	7.45857	0.00018	7.45839
109	3961.36	99.71	4.16054	0.02113	4.13941					109	3950.78	99.44	7.4688	0.00031	7.46849
110	3964.74	99.79	3.72891	0.01754	3.71137					110	3906.39	98.32	7.4565	0.01819	7.43831
111	3963.3	99.76	3.16263	0.01206	3.15057					111	3966.21	99.83	7.46805	1e-05	7.46804
112	3972.17	99.98	3.06955	0.01996	3.04959					112	3970.41	99.93	7.46543	0.00013	7.4653
113	3970.73	99.94	4.18682	0.01949	4.16733					113	3970.41	99.93	7.45915	0.0006	7.45855
114	3951.49	99.46	3.62748	0.02099	3.60649					114	3967.18	99.85	7.4516	0.00011	7.45149
115	3972.5	99.99	3.75365	0.00508	3.74857					115	3970.09	99.93	7.45715	0.00049	7.45666
116	3969.91	99.92	3.78722	0.01966	3.76756					116	3966.86	99.85	7.4284	5e-05	7.42835
117	3945.53	99.31	3.96475	0.01841	3.94634					117	3968.88	99.9	7.46712	0.00039	7.46673
118	3973	100	3.92372	0.0096	3.91412					118	3963.09	99.75	7.46383	0.02124	7.44259
119	3944.58	99.28	3.75745	0.00884	3.74861					119	3971.98	99.97	7.46581	8e-05	7.46573
120	3956.99	99.6	3.66356	0.02057	3.64299					120	3953.89	99.52	7.46844	0.01758	7.45086
121	3926.58	98.83	3.90228	0.01901	3.88327					121	3971.52	99.96	7.46175	0.021	7.44075
122	3967.84	99.87	4.1456	0.00919	4.13641					122	3972.5	99.99	7.45286	0.00199	7.45087
123	3957.3	99.6	3.68184	0.01492	3.66692					123	3972.67	99.99	7.46412	0.00029	7.46383
124	3968.8	99.89	3.36387	0.01898	3.34489					124	3945.1	99.3	7.46057	0.00024	7.46033
125	3948.72	99.39	3.81881	0.01918	3.79963					125	3966.86	99.85	7.42598	0.00437	7.42161
126	3970.41	99.93	3.21125	0.01965	3.1916					126	3972.67	99.99	7.46831	7e-05	7.46824
127	3972.67	99.99	3.57073	0.01957	3.55116					127	3906.84	98.33	7.46733	0.02145	7.44588
128	3934.22	99.02	3.97637	0.00113	3.97524					128	3969.39	99.91	7.4449	0.01778	7.42712
129	3924.93	98.79	3.39352	0.02232	3.3712					129	3958.54	99.64	7.47068	0.01947	7.45121
130	3973.01	100	3.73196	0.01882	3.71314					130	3916.66	98.58	7.46291	0.01982	7.44309
131	3968.82	99.89	3.61166	0.02074	3.59092					131	3970.41	99.93	7.46059	6e-05	7.46053
132	3951.82	99.47	2.9034	0.01915	2.88425					132	3960.39	99.68	7.4623	4e-05	7.46226
133	3963.3	99.76	4.01838	0.01536	4.00302					133	3964.92	99.8	7.46463	0.00073	7.4639
134	3902.19	98.22	3.87056	0.02111	3.84945					134	3970.41	99.93	7.44991	0.00018	7.44973
135	3958.54	99.64	3.79627	0.02171	3.77456					135	3972.5	99.99	7.41153	0.01175	7.39978
136	3969.76	99.92	3.33116	0.01985	3.31131					136	3970.73	99.94	7.4502	0.00028	7.44992
137	3970.41	99.93	2.11218	0.0119	2.10028					137	3947.16	99.35	7.45974	0.00066	7.45908
138	3959.05	99.65	4.11851	0.01948	4.09903					138	3900.95	98.19	7.47013	0.01794	7.45219
139	3971.46	99.96	3.16009	0.02127	3.13882					139	3944.58	99.28	7.46047	0.01987	7.4406
140	3962.36	99.73	3.95268	0.01715	3.93553					140	3969.44	99.91	7.45157	5e-05	7.45152
141	3969.12	99.9	4.03034	0.01721	4.01313					141	3943.91	99.27	7.47107	0.0005	7.47057
142	3970.09	99.93	3.53782	0.02173	3.51609					142	3972.35	99.98	7.41322	0.00052	7.4127
143	3973	100	3.22406	0.01738	3.20668					143	3965.26	99.8	7.46554	0.00011	7.46543
144	3970.41	99.93	4.2172	0.019	4.1982					144	3959.42	99.66	7.46931	0.00036	7.46895
145	3915.63	98.56	3.63289	0.01894	3.61395					145	3964.59	99.79	7.46971	0.00018	7.46953
146	3969.12	99.9	3.85588	0.01741	3.83847					146	3973	100	7.46765	0.00075	7.4669
147	3968.8	99.89	3.74316	0.02069	3.72247					147	3959.1	99.65	7.43547	0.005	7.43047
148	3970.95	99.95	2.19758	0.01929	2.17829					148	3970.95	99.95	7.46609	1e-05	7.46608
149	3966.86	99.85	2.63017	0.00979	2.62038					149	3946.17	99.32	7.4307	0.00137	7.42933
150	3963.77	99.77	3.07604	0.01688	3.05916					150	3954.4	99.53	7.42705	0.01945	7.4076
151	3972.67	99.99	3.31748	0.01913	3.29835					151	3962.66	99.74	7.46573	7e-05	7.46566
152	3955.44	99.56	3.25992	0.0185	3.24142					152	3972.67	99.99	7.42116	2e-05	7.42114
153	3961.04	99.7	4.08854	0.00581	4.08273					153	3956.99	99.6	7.45486	0.00021	7.45465
154	3957.48	99.61	4.10699	0.0094	4.09759					154	3966.53	99.84	7.46872	0.00076	7.46796
155	3972.5	99.99	3.56934	0.00689	3.56245					155	3972.35	99.98	7.46225	0.00112	7.46113
156	3952.85	99.49	3.33463	0.01886	3.31577					156	3971.38	99.96	7.43137	9e-05	7.43128
157	3971.98	99.97	2.88355	0.0165	2.86705					157	3972.67	99.99	7.44286	0.00061	7.44225
158	3963.3	99.76	3.42498	0.00422	3.42076					158	3972.67	99.99	7.46202	0.00022	7.4618
159	3972.67	99.99	2.56092	0.02025	2.54067					159	3961.64	99.71	7.45667	0.02342	7.43325
160	3971.98	99.97	2.94183	0.02072	2.92111					160	3949.73	99.41	7.46952	0.00012	7.4694
161	3943.59	99.26	3.30922	0.01673	3.29249					161	3972.03	99.98	7.4305	0.00021	7.43029
162	3972.35	99.98	4.07061	0.01527	4.05534					162	3972.03	99.98	7.45201	0.00012	7.45189
163	3965.89	99.82	4.07417	0.02236	4.05181					163	3909.01	98.39	7.46617	6e-05	7.46611
164	3948.11	99.37	3.96643	0.00597	3.96046					164	3940.77	99.19	7.46058	0.01954	7.44104
165	3969.91	99.92	4.02119	0.01901	4.00218					165	3964.22	99.78	7.41773	5e-05	7.41768
166	3970.95	99.95	1.2006	0.01519	1.18541					166	3967.84	99.87	7.46531	7e-05	7.46524
167	3943.68	99.26	3.55211	0.01599	3.53612					167	3969.39	99.91	7.46796	7e-05	7.46789
168	3973	100	3.40027	0.00455	3.39572					168	3968.36	99.88	7.46958	0.00017	7.46941
169	3959.05	99.65	3.79218	0.01995	3.77223					169	3968.88	99.9	7.40835	4e-05	7.40831
170	3962.67	99.74	4.01566	0.01706	3.9986					170	3968.88	99.9	7.46859	0.00018	7.46841
171	3972.03	99.98	3.26703	0.02232	3.24471					171	3971.46	99.96	7.4556	0.01901	7.43659
172	3968.88	99.9	3.15532	0.01903	3.13629					172	3900.93	98.19	7.46042	0.00013	7.46029
173	3969.12	99.9	3.46662	0.00884	3.45778					173	3969.58	99.91	7.471	0.02129	7.44971
174	3968.47	99.89	3.79841	0.0135	3.78491					174	3973	100	7.46429	9e-05	7.4642
175	3966.86	99.85	3.43777	0.00307	3.4347					175	3972.35	99.98	7.46798	0.0002	7.46778
176	3969.39	99.91	3.71792	0.00827	3.70965					176	3961.36	99.71	7.45114	0.00065	7.45049
177	3935.92	99.07	4.26558	0.01948	4.2461					177	3970.73	99.94	7.42479	0.00043	7.42436
178	3966.86	99.85	3.71072	0.0122	3.69852					178	3927.52	98.86	7.46853	0.01746	7.45107
179	3959.45	99.66	3.13696	0.02017	3.11679					179	3946.17	99.32	7.44223	5e-05	7.44218
180	3962.67	99.74	3.81902	0.00518	3.81384					180	3910.46	98.43	7.45619	0.00032	7.45587
181	3972.67	99.99	3.38074	0.01458	3.36616					181	3967.5	99.86	7.46605	0.00034	7.46571
182	3927.82	98.86	3.93441	0.01956	3.91485					182	3964.41	99.78	7.4679	0.01781	7.45009
183	3946.65	99.34	3.68314	0.018	3.66514					183	3962.5	99.74	7.46441	0.01977	7.44464
184	3964.92	99.8	3.05904	0.00285	3.05619					184	3966.29	99.83	7.46372	9e-05	7.46363
185	3904.77	98.28	3.49792	0.02195	3.47597					185	3972.35	99.98	7.46198	0.00132	7.46066
186	3949.23	99.4	3.42328	0.0181	3.40518					186	3951.99	99.47	7.47271	4e-05	7.47267
187	3966.53	99.84	4.03187	0.00894	4.02293					187	3957.63	99.61	7.46827	0.01714	7.45113
188	3945.61	99.31	4.19278	0.01993	4.17285					188	3971.06	99.95	7.45571	0.00058	7.45513
189	3970.95	99.95	3.78861	0.01524	3.77337					189	3966.86	99.85	7.39913	0	7.39913
190	3973	100	3.75845	0.00482	3.75363					190	3941.6	99.21	7.39737	0.01933	7.37804
191	3972.03	99.98	3.04062	0.00214	3.03848					191	3959.1	99.65	7.47019	0.0005	7.46969
192	3965.78	99.82	3.4892	0.01873	3.47047					192	3922.91	98.74	7.35617	0.01726	7.33891
193	3971.98	99.97	3.94397	0.01995	3.92402					193	3966.88	99.85	7.43302	0.01853	7.41449
194	3971.98	99.97	3.20088	0.00772	3.19316					194	3968.36	99.88	7.44236	0.0013	7.44106
195	3968.36	99.88	3.91862	0.02032	3.8983					195	3918.73	98.63	7.46962	0.02025	7.44937
196	3961.04	99.7	2.14585	0.0212	2.12465					196	3972.35	99.98	7.46875	3e-05	7.46872
197	3968.36	99.88	3.8306	0.01911	3.81149					197	3965.26	99.8	7.4701	0.00027	7.46983
198	3972.35	99.98	3.20595	0.00618	3.19977					198	3958.54	99.64	7.4177	0.01897	7.39873
199	3968.15	99.88	3.82151	0.01754	3.80397					199	3959.42	99.66	7.46704	5e-05	7.46699
200	3967.97	99.87	2.29161	0.02048	2.27113					200	3957.48	99.61	7.46801	9e-05	7.46792

## Sheet: 06_ACOA_Seeds(200)
Fast Converegnce Exp							Fast Converegnce Exp			Slow Converegnce Exp							Slow Converegnce Exp
#	CBLF	Quality	Taumax	Taumin	DeltaTauminmax		Global Optimal Solution =	3973.01		#	CBLF	Quality	Taumax	Taumin	DeltaTauminmax		Global Optimal Solution =	3973.01
1	3973	100	1.59271	0.00174	1.59097		Minimum Optimal Solution =	3832.65		1	3973	100	7.39633	1e-05	7.39632		Minimum Optimal Solution =	3884.61
2	3959.45	99.66	3.02749	0.01984	3.00765		Mean of Optimal Solution =	3959.53		2	3965.78	99.82	7.45643	0.01791	7.43852		Mean of Optimal Solution =	3960.68
3	3969.39	99.91	3.08015	0.01353	3.06662		Median of Optimal Solution =	3959.53		3	3961.36	99.71	7.45953	0.00027	7.45926		Median of Optimal Solution =	3960.68
4	3969.47	99.91	2.59455	0.01967	2.57488		Solution Standrad Deviation =	19.1265		4	3968.88	99.9	7.47267	0.00011	7.47256		Solution Standrad Deviation =	15.9391
5	3947.17	99.35	4.04797	0.02069	4.02728		Average Price =	19.4		5	3949.73	99.41	7.44569	0.00281	7.44288		Average Price =	65.595
6	3965.26	99.8	3.45992	0.02081	3.43911		Relability =	34		6	3972.03	99.98	7.4614	0.00017	7.46123		Relability =	30
7	3883.12	97.74	4.48435	0.01368	4.47067		Normalized Price =	57.0588		7	3968.36	99.88	7.47325	3e-05	7.47322		Normalized Price =	218.65
8	3970.41	99.93	3.67829	0.01812	3.66017		Average Solution Quality =	99.6607		8	3957.6	99.61	7.44319	0.01923	7.42396		Average Solution Quality =	99.6898
9	3954.9	99.54	3.61596	0.01696	3.599		Average FDC =	-128.264		9	3964.74	99.79	7.44282	0.01603	7.42679		Average FDC =	-47.5019
10	3972.67	99.99	3.17395	0.01906	3.15489		Correlation Coefficent =	-0.79061		10	3959.05	99.65	7.46996	0.01892	7.45104		Correlation Coefficent =	-0.85498
11	3926.78	98.84	1.99525	0.01998	1.97527		Solution Robustness =	207.018		11	3952.33	99.48	7.46957	0.01521	7.45436		Solution Robustness =	248.488
12	3959.1	99.65	3.79909	0.01972	3.77937		Performance Rate =	0.017526		12	3963.3	99.76	7.46536	8e-05	7.46528		Performance Rate =	0.0045735
13	3959.75	99.67	4.00827	0.01129	3.99698		Average Elapsed Time =	0.88339		13	3972.5	99.99	7.43287	0.00924	7.42363		Average Elapsed Time =	2.9791
14	3927.13	98.85	3.14343	0.0176	3.12583					14	3973.01	100	7.4092	7e-05	7.40913
15	3965.26	99.8	3.52047	0.01365	3.50682					15	3967.84	99.87	7.46657	0.00019	7.46638
16	3973	100	3.38165	0.01921	3.36244					16	3961.68	99.71	7.46655	0.00068	7.46587
17	3964.74	99.79	3.56528	0.02096	3.54432					17	3966.88	99.85	7.45994	0.02232	7.43762
18	3969.39	99.91	4.14808	0.00113	4.14695					18	3911.36	98.45	7.46973	0.01584	7.45389
19	3973	100	3.85209	0.00564	3.84645					19	3965.26	99.8	7.47035	3e-05	7.47032
20	3953.89	99.52	3.36866	0.02026	3.3484					20	3971.46	99.96	7.46414	0.01752	7.44662
21	3965.78	99.82	3.97835	0.01888	3.95947					21	3956.98	99.6	7.45041	0.01951	7.4309
22	3965.24	99.8	2.72198	0.01803	2.70395					22	3931.08	98.94	7.42874	0.01946	7.40928
23	3970.73	99.94	3.47665	0.00745	3.4692					23	3972.67	99.99	7.43923	0.00019	7.43904
24	3912.01	98.46	4.107	0.02251	4.08449					24	3969.44	99.91	7.46843	9e-05	7.46834
25	3968.47	99.89	4.3762	0.00526	4.37094					25	3970.09	99.93	7.44769	9e-05	7.4476
26	3964.27	99.78	3.89535	0.01676	3.87859					26	3972.35	99.98	7.45974	0.00015	7.45959
27	3921.83	98.71	3.43126	0.02011	3.41115					27	3968.8	99.89	7.46255	0.00011	7.46244
28	3972.5	99.99	4.01997	0.01503	4.00494					28	3972.67	99.99	7.46683	9e-05	7.46674
29	3949.75	99.41	3.50887	0.01913	3.48974					29	3949.75	99.41	7.47113	0.01918	7.45195
30	3971.98	99.97	3.24265	0.01147	3.23118					30	3968.61	99.89	7.46617	0.01655	7.44962
31	3968.36	99.88	2.84866	0.00626	2.8424					31	3959.13	99.65	7.46693	0.02104	7.44589
32	3963.33	99.76	4.14975	0.01988	4.12987					32	3972.67	99.99	7.45178	0.00223	7.44955
33	3930.1	98.92	3.77438	0.02171	3.75267					33	3967.97	99.87	7.45536	0.02008	7.43528
34	3967.84	99.87	3.59654	0.01783	3.57871					34	3968.29	99.88	7.46174	0.02044	7.4413
35	3967.18	99.85	3.38116	0.00878	3.37238					35	3963.19	99.75	7.46723	1e-05	7.46722
36	3968.36	99.88	3.35612	0.01884	3.33728					36	3959.1	99.65	7.45337	0.0002	7.45317
37	3971.98	99.97	2.50278	0.01625	2.48653					37	3939.71	99.16	7.45251	0.00013	7.45238
38	3971.52	99.96	4.09986	0.01593	4.08393					38	3970.41	99.93	7.41762	0	7.41762
39	3967.64	99.86	3.91352	0.01951	3.89401					39	3970.41	99.93	7.43739	0.00437	7.43302
40	3968.88	99.9	3.48531	0.02061	3.4647					40	3960.51	99.69	7.4585	0.02135	7.43715
41	3969.39	99.91	3.3841	0.01808	3.36602					41	3959.42	99.66	7.35731	0.01051	7.3468
42	3972.67	99.99	3.23276	0.00676	3.226					42	3963.71	99.77	7.45777	0.01527	7.4425
43	3972.5	99.99	3.05474	0.01827	3.03647					43	3953.61	99.51	7.45641	0.00377	7.45264
44	3962.15	99.73	2.90835	0.01875	2.8896					44	3966.29	99.83	7.44642	0.00106	7.44536
45	3967.18	99.85	3.90309	0.01092	3.89217					45	3884.61	97.77	7.46834	0.01774	7.4506
46	3943.55	99.26	3.74415	0.01603	3.72812					46	3964.74	99.79	7.44294	0.00018	7.44276
47	3968.88	99.9	3.06142	0.01339	3.04803					47	3972.35	99.98	7.46616	4e-05	7.46612
48	3972.67	99.99	3.20942	0.01704	3.19238					48	3968.36	99.88	7.45801	0.00136	7.45665
49	3970.95	99.95	3.14229	0.01905	3.12324					49	3968.88	99.9	7.45914	0.00044	7.4587
50	3963.71	99.77	2.61186	0.00903	2.60283					50	3951.99	99.47	7.4725	1e-05	7.47249
51	3963.77	99.77	3.22422	0.01951	3.20471					51	3970.73	99.94	7.46824	6e-05	7.46818
52	3965.78	99.82	3.37288	0.00791	3.36497					52	3968.88	99.9	7.44398	0.00021	7.44377
53	3962.16	99.73	4.09097	0.0179	4.07307					53	3968.88	99.9	7.46308	0.0201	7.44298
54	3967.84	99.87	3.16147	0.01454	3.14693					54	3953.37	99.51	7.45753	0.02097	7.43656
55	3865.48	97.29	4.16314	0.02041	4.14273					55	3970.09	99.93	7.46147	0.00033	7.46114
56	3972.03	99.98	3.5977	0.00786	3.58984					56	3970.41	99.93	7.4643	0.0002	7.4641
57	3941.6	99.21	3.76257	0.01771	3.74486					57	3961.39	99.71	7.46106	0.01895	7.44211
58	3970.09	99.93	3.83189	0.0186	3.81329					58	3973	100	7.46489	5e-05	7.46484
59	3948.2	99.38	3.18924	0.01629	3.17295					59	3964.59	99.79	7.46358	0.00043	7.46315
60	3972.67	99.99	3.85077	0.01866	3.83211					60	3893.91	98.01	7.46825	0.01912	7.44913
61	3832.65	96.47	3.04293	0.01938	3.02355					61	3973.01	100	7.46209	0.00034	7.46175
62	3963.62	99.76	2.75763	0.00912	2.74851					62	3896.85	98.08	7.47305	0.01746	7.45559
63	3962.67	99.74	4.29979	0.01747	4.28232					63	3964.62	99.79	7.4651	0.017	7.4481
64	3965.78	99.82	3.10195	0.01725	3.0847					64	3968.88	99.9	7.34336	0.01647	7.32689
65	3968.88	99.9	3.31249	0.0164	3.29609					65	3962.98	99.75	7.45374	0.00107	7.45267
66	3972.67	99.99	3.48942	0.02417	3.46525					66	3920.01	98.67	7.45087	0.02075	7.43012
67	3943.47	99.26	3.18008	0.02342	3.15666					67	3965.26	99.8	7.45618	0.01634	7.43984
68	3968.36	99.88	3.76816	0.01926	3.7489					68	3969.76	99.92	7.45238	0.00025	7.45213
69	3972.5	99.99	3.85762	0.01835	3.83927					69	3968.88	99.9	7.46649	4e-05	7.46645
70	3908.39	98.37	2.75089	0.01738	2.73351					70	3970.09	99.93	7.46406	0.00014	7.46392
71	3947.47	99.36	4.27676	0.02021	4.25655					71	3952.96	99.5	7.4656	0.00033	7.46527
72	3931.08	98.94	3.56996	0.01946	3.5505					72	3955.44	99.56	7.46016	0.0212	7.43896
73	3970.95	99.95	3.23509	0.01397	3.22112					73	3962.16	99.73	7.46909	0.01514	7.45395
74	3972.03	99.98	2.98005	0.01985	2.9602					74	3959.45	99.66	7.46614	0.01738	7.44876
75	3968.88	99.9	3.74777	0.01941	3.72836					75	3972.5	99.99	7.45357	0.00053	7.45304
76	3965.26	99.8	3.11151	0.01715	3.09436					76	3972.03	99.98	7.45874	0.00035	7.45839
77	3964.59	99.79	3.57316	0.01431	3.55885					77	3923.89	98.76	7.46314	0.01794	7.4452
78	3958.8	99.64	4.00924	0.01858	3.99066					78	3970.41	99.93	7.46011	0.00056	7.45955
79	3967.5	99.86	2.6675	0.02048	2.64702					79	3957.16	99.6	7.46632	0.00104	7.46528
80	3973	100	4.01496	0.01688	3.99808					80	3968.88	99.9	7.463	9e-05	7.46291
81	3972.03	99.98	2.09728	0.01215	2.08513					81	3964.92	99.8	7.46148	0.00047	7.46101
82	3972.35	99.98	2.8424	0.00364	2.83876					82	3959.1	99.65	7.4693	0.00024	7.46906
83	3909.14	98.39	3.26332	0.01982	3.2435					83	3972.35	99.98	7.3814	4e-05	7.38136
84	3964.59	99.79	3.21232	0.0067	3.20562					84	3940.44	99.18	7.4435	0.01687	7.42663
85	3968.36	99.88	3.16029	0.01672	3.14357					85	3922.86	98.74	7.4397	0.00068	7.43902
86	3916.44	98.58	3.73357	0.01525	3.71832					86	3962.8	99.74	7.40806	0.0184	7.38966
87	3970.73	99.94	2.47326	0.02042	2.45284					87	3970.41	99.93	7.45561	0.00028	7.45533
88	3972.35	99.98	3.59607	0.0089	3.58717					88	3965.27	99.81	7.46883	0.01488	7.45395
89	3969.12	99.9	3.89185	0.01413	3.87772					89	3966.35	99.83	7.44934	0.01684	7.4325
90	3968.8	99.89	4.21257	0.00324	4.20933					90	3958.78	99.64	7.46656	0.0009	7.46566
91	3968.88	99.9	3.5789	0.0239	3.555					91	3960.09	99.67	7.47271	0.0176	7.45511
92	3970.73	99.94	2.92006	0.0167	2.90336					92	3973	100	7.46509	0.00013	7.46496
93	3961.5	99.71	4.12157	0.01721	4.10436					93	3913.04	98.49	7.4693	0.00022	7.46908
94	3966.53	99.84	3.36834	0.014	3.35434					94	3962.67	99.74	7.42092	0.00018	7.42074
95	3972.35	99.98	3.5715	0.00876	3.56274					95	3962.67	99.74	7.45257	6e-05	7.45251
96	3932.05	98.97	3.81538	0.01873	3.79665					96	3965.78	99.82	7.47349	0.00015	7.47334
97	3966.86	99.85	3.78354	0.01765	3.76589					97	3968.47	99.89	7.42844	0.00013	7.42831
98	3970.95	99.95	3.59964	0.00575	3.59389					98	3970.95	99.95	7.36172	1e-05	7.36171
99	3963.95	99.77	3.36895	0.01817	3.35078					99	3958.8	99.64	7.45364	0.01983	7.43381
100	3972.35	99.98	3.87167	0.01783	3.85384					100	3907.36	98.35	7.46506	0.02296	7.4421
101	3967.5	99.86	3.9212	0.00698	3.91422					101	3967.18	99.85	7.47096	0.00029	7.47067
102	3972.5	99.99	3.91754	0.01645	3.90109					102	3910.97	98.44	7.4531	0.00013	7.45297
103	3956.99	99.6	3.99374	0.01584	3.9779					103	3970.41	99.93	7.45306	9e-05	7.45297
104	3966.53	99.84	3.7311	0.00476	3.72634					104	3966.21	99.83	7.44495	0.00098	7.44397
105	3956.95	99.6	4.11426	0.01956	4.0947					105	3969.91	99.92	7.40084	0.02115	7.37969
106	3949.73	99.41	4.40239	0.00617	4.39622					106	3959.05	99.65	7.427	7e-05	7.42693
107	3973.01	100	3.87848	0.01854	3.85994					107	3972.03	99.98	7.47047	5e-05	7.47042
108	3922.35	98.72	4.08746	0.0186	4.06886					108	3963.3	99.76	7.45973	0.00011	7.45962
109	3919.12	98.64	3.66729	0.01893	3.64836					109	3966.29	99.83	7.46861	7e-05	7.46854
110	3972.67	99.99	3.89412	0.01532	3.8788					110	3966.53	99.84	7.46069	4e-05	7.46065
111	3931.14	98.95	4.43255	0.0185	4.41405					111	3967.33	99.86	7.47171	0.01578	7.45593
112	3964.92	99.8	4.01891	0.0096	4.00931					112	3970.41	99.93	7.47063	0.00033	7.4703
113	3948.72	99.39	3.89759	0.01755	3.88004					113	3955.44	99.56	7.44373	0.0191	7.42463
114	3962.66	99.74	2.52181	0.00982	2.51199					114	3969.39	99.91	7.46154	0.00023	7.46131
115	3958.27	99.63	3.7611	0.01901	3.74209					115	3972.5	99.99	7.45863	0.01684	7.44179
116	3971.06	99.95	3.62913	0.02244	3.60669					116	3954.1	99.52	7.46113	0.01836	7.44277
117	3964.92	99.8	3.3783	0.01771	3.36059					117	3963.3	99.76	7.46124	0.00015	7.46109
118	3966.21	99.83	3.52531	0.01853	3.50678					118	3953.37	99.51	7.46458	0.00032	7.46426
119	3969.14	99.9	3.56239	0.01967	3.54272					119	3959.75	99.67	7.45713	0.00019	7.45694
120	3950.27	99.43	3.69777	0.02097	3.6768					120	3954.07	99.52	7.45791	0.02183	7.43608
121	3963.3	99.76	3.28453	0.02106	3.26347					121	3937.86	99.12	7.47002	0.02138	7.44864
122	3953.37	99.51	3.58876	0.01714	3.57162					122	3968.82	99.89	7.4175	0.02097	7.39653
123	3965.78	99.82	2.36535	0.01783	2.34752					123	3967.84	99.87	7.42791	0.001	7.42691
124	3926.14	98.82	3.54816	0.01569	3.53247					124	3953.28	99.5	7.38554	0.01375	7.37179
125	3953.89	99.52	3.84068	0.01656	3.82412					125	3902.7	98.23	7.46094	0.0191	7.44184
126	3973	100	3.34691	0.00968	3.33723					126	3941.6	99.21	7.47015	0.01756	7.45259
127	3970.41	99.93	3.33801	0.01841	3.3196					127	3968.88	99.9	7.44996	0.00089	7.44907
128	3963.42	99.76	3.64694	0.02077	3.62617					128	3965.26	99.8	7.46602	0.01836	7.44766
129	3963.19	99.75	3.44723	0.0186	3.42863					129	3972.67	99.99	7.46418	0.00026	7.46392
130	3970.09	99.93	3.05557	0.01926	3.03631					130	3962.98	99.75	7.45311	0.00019	7.45292
131	3970.41	99.93	3.3496	0.00612	3.34348					131	3953.89	99.52	7.46836	0.01965	7.44871
132	3938.89	99.14	3.439	0.0038	3.4352					132	3969.58	99.91	7.46947	0.01661	7.45286
133	3966.53	99.84	3.69771	0.01395	3.68376					133	3962.16	99.73	7.45097	0.01823	7.43274
134	3949.2	99.4	3.47526	0.02157	3.45369					134	3965.26	99.8	7.47216	9e-05	7.47207
135	3972.03	99.98	3.53708	0.01791	3.51917					135	3969.39	99.91	7.44459	0.00065	7.44394
136	3966.86	99.85	3.25766	0.0192	3.23846					136	3931.14	98.95	7.46442	0.0214	7.44302
137	3965.26	99.8	3.62465	0.01545	3.6092					137	3966.53	99.84	7.45845	0.0001	7.45835
138	3971.52	99.96	3.78535	0.01649	3.76886					138	3970.95	99.95	7.44923	0.00283	7.4464
139	3965.78	99.82	3.11407	0.01805	3.09602					139	3971.98	99.97	7.4416	0.00046	7.44114
140	3970.41	99.93	3.48187	0.01515	3.46672					140	3942.41	99.23	7.46915	0.01755	7.4516
141	3965.26	99.8	3.99634	0.00704	3.9893					141	3925.45	98.8	7.46351	0.00043	7.46308
142	3959.57	99.66	3.57827	0.0067	3.57157					142	3970.73	99.94	7.41007	2e-05	7.41005
143	3941.65	99.21	3.80739	0.00647	3.80092					143	3964.59	99.79	7.46865	4e-05	7.46861
144	3973.01	100	3.13119	0.021	3.11019					144	3972.35	99.98	7.46759	0.00029	7.4673
145	3939.34	99.15	3.5177	0.01687	3.50083					145	3967.5	99.86	7.44644	0.00063	7.44581
146	3972.5	99.99	3.60816	0.02076	3.5874					146	3962.66	99.74	7.46091	4e-05	7.46087
147	3937.86	99.12	3.48803	0.01466	3.47337					147	3967.18	99.85	7.47238	0.00019	7.47219
148	3966.56	99.84	3.83635	0.01818	3.81817					148	3947.88	99.37	7.46274	0.0186	7.44414
149	3950.79	99.44	3.69665	0.0199	3.67675					149	3956.99	99.6	7.45627	0.01724	7.43903
150	3965.26	99.8	3.71955	0.01255	3.707					150	3954.69	99.54	7.46037	0.0176	7.44277
151	3973	100	3.7087	0.01989	3.68881					151	3963.19	99.75	7.45999	0.01602	7.44397
152	3971.06	99.95	3.71835	0.01839	3.69996					152	3968.88	99.9	7.47131	0.01379	7.45752
153	3956.31	99.58	3.0924	0.02224	3.07016					153	3968.36	99.88	7.43246	0.01742	7.41504
154	3950.08	99.42	3.59434	0.01941	3.57493					154	3959.42	99.66	7.46637	0.00056	7.46581
155	3941.33	99.2	3.1248	0.01753	3.10727					155	3972.5	99.99	7.46735	6e-05	7.46729
156	3953.89	99.52	3.88818	0.01554	3.87264					156	3972.35	99.98	7.46752	0.00038	7.46714
157	3968.36	99.88	2.92016	0.00661	2.91355					157	3972.67	99.99	7.46823	0.0001	7.46813
158	3972.35	99.98	3.26273	0.00504	3.25769					158	3973	100	7.47034	0.0001	7.47024
159	3916.14	98.57	3.95451	0.02078	3.93373					159	3966.88	99.85	7.45227	0.01819	7.43408
160	3960.51	99.69	4.03661	0.02062	4.01599					160	3967.5	99.86	7.4587	7e-05	7.45863
161	3940.96	99.19	4.03344	0.00573	4.02771					161	3972.67	99.99	7.45843	0.00053	7.4579
162	3968.36	99.88	2.9929	0.01805	2.97485					162	3959.05	99.65	7.47238	0.01509	7.45729
163	3949.75	99.41	3.6679	0.01586	3.65204					163	3966.21	99.83	7.4627	0.00072	7.46198
164	3928.03	98.87	2.62375	0.01866	2.60509					164	3964.74	99.79	7.46165	0.00023	7.46142
165	3972.35	99.98	2.96402	0.01854	2.94548					165	3967.18	99.85	7.47127	9e-05	7.47118
166	3972.67	99.99	3.34413	0.01911	3.32502					166	3956.99	99.6	7.45415	0.01956	7.43459
167	3964.94	99.8	3.42671	0.01916	3.40755					167	3970.41	99.93	7.46854	4e-05	7.4685
168	3973.01	100	3.72308	0.01318	3.7099					168	3968.36	99.88	7.45577	0.01973	7.43604
169	3966.53	99.84	3.17467	0.01566	3.15901					169	3973	100	7.45809	0.0008	7.45729
170	3964.27	99.78	3.68396	0.01953	3.66443					170	3969.91	99.92	7.45871	0.01672	7.44199
171	3962.16	99.73	3.46653	0.01829	3.44824					171	3962.77	99.74	7.46906	0.0147	7.45436
172	3972.5	99.99	3.00472	0.0216	2.98312					172	3964.22	99.78	7.4569	0.02093	7.43597
173	3971.46	99.96	3.31232	0.00287	3.30945					173	3967.5	99.86	7.42803	0.0003	7.42773
174	3969.39	99.91	3.33324	0.01638	3.31686					174	3945.3	99.3	7.45381	0.0198	7.43401
175	3960.72	99.69	3.31513	0.02095	3.29418					175	3971.98	99.97	7.39432	0.00337	7.39095
176	3928.55	98.88	4.01588	0.01863	3.99725					176	3959.57	99.66	7.4554	0.01985	7.43555
177	3940.96	99.19	3.00796	0.02037	2.98759					177	3969.39	99.91	7.45757	0.00044	7.45713
178	3964.59	99.79	2.61915	0.01784	2.60131					178	3966.29	99.83	7.46155	0.00023	7.46132
179	3949.75	99.41	2.71441	0.02062	2.69379					179	3973	100	7.46027	5e-05	7.46022
180	3956.51	99.58	4.03871	0.01552	4.02319					180	3940.44	99.18	7.4634	0.0174	7.446
181	3964.22	99.78	4.27421	0.02266	4.25155					181	3963.19	99.75	7.46714	0.02148	7.44566
182	3970.09	99.93	3.5597	0.02253	3.53717					182	3972.35	99.98	7.46268	7e-05	7.46261
183	3970.95	99.95	3.22687	0.01827	3.2086					183	3962.77	99.74	7.46122	0.01723	7.44399
184	3968.8	99.89	2.64709	0.01989	2.6272					184	3969.44	99.91	7.46294	0.00081	7.46213
185	3969.76	99.92	4.01163	0.01595	3.99568					185	3973	100	7.45357	0.00083	7.45274
186	3962.16	99.73	2.93232	0.0204	2.91192					186	3964.92	99.8	7.46009	0.0003	7.45979
187	3964.92	99.8	2.51848	0.01811	2.50037					187	3971.06	99.95	7.46648	0.00023	7.46625
188	3973	100	3.73423	0.00444	3.72979					188	3948.2	99.38	7.45578	0.01764	7.43814
189	3967.5	99.86	3.48998	0.0036	3.48638					189	3926.81	98.84	7.47018	0.01884	7.45134
190	3971.06	99.95	4.01247	0.00719	4.00528					190	3970.41	99.93	7.47217	3e-05	7.47214
191	3968.8	99.89	4.06542	0.01761	4.04781					191	3970.95	99.95	7.43833	9e-05	7.43824
192	3962.66	99.74	3.01737	0.01475	3.00262					192	3964.22	99.78	7.46907	0.01551	7.45356
193	3963.79	99.77	3.89641	0.02053	3.87588					193	3969.39	99.91	7.45867	0.01954	7.43913
194	3972.35	99.98	2.01994	0.00252	2.01742					194	3962.33	99.73	7.36202	2e-05	7.362
195	3969.91	99.92	4.14673	0.01767	4.12906					195	3932.49	98.98	7.46966	0.01904	7.45062
196	3966.86	99.85	3.66045	0.01063	3.64982					196	3962.98	99.75	7.46045	7e-05	7.46038
197	3970.43	99.94	4.22008	0.01663	4.20345					197	3964.74	99.79	7.46438	0.01844	7.44594
198	3964.74	99.79	3.31096	0.01856	3.2924					198	3970.73	99.94	7.46576	0.00049	7.46527
199	3971.06	99.95	4.11815	0.0059	4.11225					199	3967.5	99.86	7.44708	0.002	7.44508
200	3969.76	99.92	2.8859	0.01608	2.86982					200	3968.36	99.88	7.47478	0.00016	7.47462

## Sheet: 07_ACOA_Seeds(167)
Fast Converegnce Exp							Fast Converegnce Exp			Slow Converegnce Exp							Slow Converegnce Exp
1	3937.34	99.1	3.13838	0.01962	3.11876		Global Optimal Solution =	3973.01		#	CBLF	Quality	Taumax	Taumin	DeltaTauminmax		Global Optimal Solution =	3973.01
1	3937.34	99.1	3.13838	0.01962	3.11876		Minimum Optimal Solution =	3881.51		1	3937.34	99.1	7.39939	0.01962	7.37977		Minimum Optimal Solution =	3886.68
2	3968.36	99.88	3.85003	0.02144	3.82859		Mean of Optimal Solution =	3962.73		2	3958.25	99.63	7.4598	0.02063	7.43917		Mean of Optimal Solution =	3962.5
3	3970.43	99.94	2.70514	0.00486	2.70028		Median of Optimal Solution=	3962.73		3	3959.68	99.66	7.45715	0.01959	7.43756		Median of Optimal Solution =	3962.5
4	3967.84	99.87	2.99266	0.0187	2.97396		Solution Standrad Deviation =	12.9983		4	3971.98	99.97	7.46582	6e-05	7.46576		Solution Standrad Deviation =	13.9052
5	3953.93	99.52	3.89086	0.01895	3.87191		Average Price =	19.6		5	3968.88	99.9	7.44652	6e-05	7.44646		Average Price =	65.85
6	3970.43	99.94	3.31413	0.01182	3.30231		Relability =	40.5		6	3971.46	99.96	7.46301	3e-05	7.46298		Relability =	36
7	3972.03	99.98	2.9431	0.02052	2.92258		Normalized Price =	48.3951		7	3969.39	99.91	7.4584	0.00014	7.45826		Normalized Price =	182.917
8	3953.28	99.5	3.4624	0.00593	3.45647		Average Solution Quality =	99.7412		8	3962.16	99.73	7.47112	0.01766	7.45346		Average Solution Quality =	99.7355
9	3972.67	99.99	2.78946	0.02146	2.768		Average FDC =	-128.769		9	3962.47	99.73	7.45468	0.01943	7.43525		Average FDC =	-45.1608
10	3955.22	99.55	3.92099	0.01771	3.90328		Correlation Coefficent =	-0.79713		10	3964.92	99.8	7.44968	0.00023	7.44945		Correlation Coefficent =	-0.83099
11	3971.98	99.97	3.82	0.00714	3.81286		Solution Robustness =	304.865		11	3971.06	99.95	7.46636	0.00014	7.46622		Solution Robustness =	284.965
12	3972.03	99.98	3.98733	0.00623	3.9811		Performance Rate =	0.020663		12	3971.52	99.96	7.46987	0.02002	7.44985		Performance Rate =	0.005467
13	3973	100	3.8489	0.00235	3.84655		Average Elapsed Time =	0.90517		13	3962.45	99.73	7.44954	0.01967	7.42987		Average Elapsed Time =	3.0424
14	3957.3	99.6	3.09119	0.01768	3.07351					14	3968.88	99.9	7.46681	0.01639	7.45042
15	3971.06	99.95	3.81582	0.01809	3.79773					15	3970.41	99.93	7.4604	0.00101	7.45939
16	3972.03	99.98	3.32498	0.0181	3.30688					16	3893.6	98	7.4568	0.01935	7.43745
17	3952.33	99.48	4.12619	0.01862	4.10757					17	3967.84	99.87	7.46232	0.02118	7.44114
18	3972.67	99.99	3.19528	0.02029	3.17499					18	3954.02	99.52	7.46622	0.01737	7.44885
19	3973.01	100	3.60127	0.00932	3.59195					19	3951.99	99.47	7.44792	0.00082	7.4471
20	3967.18	99.85	3.56302	0.00645	3.55657					20	3972.5	99.99	7.46779	0.0015	7.46629
21	3959.24	99.65	4.04392	0.01718	4.02674					21	3966.86	99.85	7.47027	0.00011	7.47016
22	3949.75	99.41	3.02307	0.00292	3.02015					22	3960.61	99.69	7.47011	0.02332	7.44679
23	3941.12	99.2	3.52117	0.01899	3.50218					23	3964.27	99.78	7.41322	0.00602	7.4072
24	3968.36	99.88	3.93951	0.01788	3.92163					24	3965.26	99.8	7.46865	0.01386	7.45479
25	3968.88	99.9	3.53986	0.02017	3.51969					25	3959.1	99.65	7.43298	0.00114	7.43184
26	3971.98	99.97	2.58225	0.01583	2.56642					26	3972.67	99.99	7.46084	0.00021	7.46063
27	3955.95	99.57	4.34954	0.01499	4.33455					27	3968.8	99.89	7.47276	0.00017	7.47259
28	3970.73	99.94	4.066	0.00581	4.06019					28	3964.74	99.79	7.40295	0.01844	7.38451
29	3972.35	99.98	3.73832	0.003	3.73532					29	3972.5	99.99	7.40499	0.00423	7.40076
30	3972.03	99.98	3.46396	0.0185	3.44546					30	3941.28	99.2	7.46185	0.01918	7.44267
31	3965.78	99.82	3.25316	0.00987	3.24329					31	3961.64	99.71	7.43579	0.00021	7.43558
32	3971.46	99.96	3.85479	0.01047	3.84432					32	3970.41	99.93	7.4492	0.00018	7.44902
33	3960.72	99.69	3.69041	0.00598	3.68443					33	3964.22	99.78	7.43089	0.0192	7.41169
34	3970.73	99.94	3.60221	0.02027	3.58194					34	3949.75	99.41	7.39231	0.01955	7.37276
35	3962.67	99.74	2.87947	0.02369	2.85578					35	3970.41	99.93	7.44172	0.00024	7.44148
36	3970.23	99.93	2.9692	0.01874	2.95046					36	3966.53	99.84	7.46556	7e-05	7.46549
37	3965.89	99.82	2.78937	0.02089	2.76848					37	3971.46	99.96	7.46574	0.00033	7.46541
38	3948.2	99.38	3.8583	0.02148	3.83682					38	3946.13	99.32	7.46218	0.01947	7.44271
39	3972.35	99.98	4.00094	0.00303	3.99791					39	3946.13	99.32	7.46753	0.00041	7.46712
40	3962.01	99.72	3.15483	0.01957	3.13526					40	3971.98	99.97	7.47257	7e-05	7.4725
41	3969.44	99.91	3.65449	0.00403	3.65046					41	3953.89	99.52	7.46263	0.01576	7.44687
42	3962.66	99.74	3.91879	0.01018	3.90861					42	3953.37	99.51	7.4711	0.01878	7.45232
43	3956.95	99.6	3.10004	0.01931	3.08073					43	3908.51	98.38	7.46876	0.01986	7.4489
44	3967.53	99.86	3.97989	0.01611	3.96378					44	3973.01	100	7.45927	5e-05	7.45922
45	3961.04	99.7	2.08829	0.02002	2.06827					45	3968.36	99.88	7.44271	0.00504	7.43767
46	3952.33	99.48	4.05657	0.02055	4.03602					46	3953.89	99.52	7.46626	0.01925	7.44701
47	3969.76	99.92	3.91081	0.01564	3.89517					47	3969.44	99.91	7.46467	0.00061	7.46406
48	3973	100	4.04963	0.00884	4.04079					48	3886.68	97.83	7.36688	0.02067	7.34621
49	3960.39	99.68	3.29151	0.01745	3.27406					49	3972.35	99.98	7.41868	5e-05	7.41863
50	3958.78	99.64	3.80517	0.01857	3.7866					50	3965.7	99.82	7.46979	0.02232	7.44747
51	3972.67	99.99	3.21103	0.01913	3.1919					51	3972.67	99.99	7.4584	8e-05	7.45832
52	3971.52	99.96	3.1356	0.01772	3.11788					52	3964.92	99.8	7.45717	0.00105	7.45612
53	3968.36	99.88	3.75486	0.01896	3.7359					53	3972.35	99.98	7.45784	0.00013	7.45771
54	3972.35	99.98	2.73717	0.01741	2.71976					54	3904.77	98.28	7.46775	0.01603	7.45172
55	3972.5	99.99	3.43805	0.01867	3.41938					55	3967.33	99.86	7.45602	0.02196	7.43406
56	3968.29	99.88	3.28556	0.02184	3.26372					56	3973	100	7.46161	4e-05	7.46157
57	3970.95	99.95	2.86776	0.01927	2.84849					57	3944.06	99.27	7.43573	0.01817	7.41756
58	3971.06	99.95	3.2959	0.00783	3.28807					58	3906.32	98.32	7.47202	0.02049	7.45153
59	3931.14	98.95	4.01768	0.01927	3.99841					59	3966.53	99.84	7.45868	0.00022	7.45846
60	3963.09	99.75	3.88492	0.01633	3.86859					60	3944.06	99.27	7.47225	0.0212	7.45105
61	3918.7	98.63	3.53876	0.01508	3.52368					61	3967.97	99.87	7.44117	0.01908	7.42209
62	3967.33	99.86	3.48089	0.01617	3.46472					62	3960.72	99.69	7.39745	0.01099	7.38646
63	3973.01	100	2.78464	0.02059	2.76405					63	3953.28	99.5	7.46589	0.00033	7.46556
64	3966.86	99.85	3.4989	0.01025	3.48865					64	3973	100	7.47166	0.00018	7.47148
65	3931.14	98.95	3.51815	0.01949	3.49866					65	3970.73	99.94	7.45527	9e-05	7.45518
66	3972.5	99.99	3.46369	0.01849	3.4452					66	3968.88	99.9	7.40647	1e-05	7.40646
67	3959.22	99.65	3.90537	0.01748	3.88789					67	3948.23	99.38	7.45446	0.01732	7.43714
68	3938.04	99.12	3.72714	0.0193	3.70784					68	3964.92	99.8	7.45228	7e-05	7.45221
69	3947.16	99.35	2.92235	0.02135	2.901					69	3928.03	98.87	7.45784	0.01738	7.44046
70	3953.89	99.52	3.46388	0.01846	3.44542					70	3970.73	99.94	7.4409	0.00115	7.43975
71	3958.54	99.64	3.88537	0.01748	3.86789					71	3972.35	99.98	7.46572	0.00029	7.46543
72	3950.79	99.44	3.80658	0.01788	3.7887					72	3957.95	99.62	7.42952	0.02211	7.40741
73	3963.3	99.76	3.20322	0.02009	3.18313					73	3971.98	99.97	7.42025	2e-05	7.42023
74	3947.14	99.35	4.05813	0.00446	4.05367					74	3951.02	99.45	7.45459	0.00025	7.45434
75	3952.99	99.5	3.93401	0.0176	3.91641					75	3967.18	99.85	7.44726	0.00018	7.44708
76	3968.88	99.9	3.92128	0.02332	3.89796					76	3956.99	99.6	7.47179	0.00035	7.47144
77	3971.98	99.97	3.11176	0.01374	3.09802					77	3972.35	99.98	7.44926	0.00031	7.44895
78	3961.71	99.72	3.40498	0.02184	3.38314					78	3970.73	99.94	7.46802	3e-05	7.46799
79	3968.36	99.88	2.86297	0.01684	2.84613					79	3971.98	99.97	7.45807	0.00018	7.45789
80	3972.67	99.99	3.64542	0.01808	3.62734					80	3956.47	99.58	7.46238	0.00082	7.46156
81	3962.98	99.75	2.76944	0.01844	2.751					81	3968.36	99.88	7.46337	0.02074	7.44263
82	3972.35	99.98	2.10103	0.01912	2.08191					82	3956.95	99.6	7.47347	0.02067	7.4528
83	3968.36	99.88	3.61469	0.01962	3.59507					83	3971.85	99.97	7.46604	0.01501	7.45103
84	3971.52	99.96	3.88437	0.02347	3.8609					84	3965.26	99.8	7.39015	0.01493	7.37522
85	3965.38	99.81	3.75152	0.01627	3.73525					85	3966.53	99.84	7.34542	0.01117	7.33425
86	3971.52	99.96	3.52953	0.01946	3.51007					86	3972.17	99.98	7.4673	0.01893	7.44837
87	3969.76	99.92	3.72393	0.00602	3.71791					87	3972.35	99.98	7.44322	3e-05	7.44319
88	3939.66	99.16	3.61801	0.01743	3.60058					88	3962.67	99.74	7.42044	0.00594	7.4145
89	3966.53	99.84	3.64746	0.01408	3.63338					89	3970.23	99.93	7.44277	0.01691	7.42586
90	3962.16	99.73	3.43196	0.0191	3.41286					90	3959.05	99.65	7.46285	4e-05	7.46281
91	3968.88	99.9	3.85311	0.00705	3.84606					91	3970.73	99.94	7.4689	0.00025	7.46865
92	3967.33	99.86	3.7862	0.00674	3.77946					92	3969.76	99.92	7.46748	0.00012	7.46736
93	3971.98	99.97	3.15414	0.0006	3.15354					93	3965.26	99.8	7.4658	0.01868	7.44712
94	3970.41	99.93	3.73085	0.00898	3.72187					94	3968.36	99.88	7.46247	0.01739	7.44508
95	3950.27	99.43	2.741	0.01944	2.72156					95	3960.72	99.69	7.47135	0.00012	7.47123
96	3973.01	100	4.03096	0.02137	4.00959					96	3960.61	99.69	7.47046	0.00013	7.47033
97	3970.73	99.94	3.35108	0.01942	3.33166					97	3966.68	99.84	7.47083	0.01749	7.45334
98	3962.15	99.73	3.79434	0.01757	3.77677					98	3970.41	99.93	7.463	8e-05	7.46292
99	3968.88	99.9	3.53789	0.01905	3.51884					99	3971.98	99.97	7.45261	0.00024	7.45237
100	3968.47	99.89	3.20362	0.0204	3.18322					100	3947.16	99.35	7.46197	0.00024	7.46173
101	3961.64	99.71	3.31832	0.01611	3.30221					101	3955.95	99.57	7.42765	6e-05	7.42759
102	3926.47	98.83	3.30122	0.02143	3.27979					102	3962.67	99.74	7.45811	0.02007	7.43804
103	3963	99.75	3.34015	0.02109	3.31906					103	3949.73	99.41	7.4245	0.00014	7.42436
104	3955.95	99.57	3.68513	0.01832	3.66681					104	3972.5	99.99	7.44701	3e-05	7.44698
105	3951.14	99.45	3.32249	0.01824	3.30425					105	3951.02	99.45	7.45876	0.00026	7.4585
106	3971.98	99.97	3.81062	0.00701	3.80361					106	3962.16	99.73	7.46427	0.01941	7.44486
107	3961.83	99.72	2.61082	0.02028	2.59054					107	3971.98	99.97	7.46615	3e-05	7.46612
108	3972.35	99.98	3.44625	0.00651	3.43974					108	3967.82	99.87	7.4551	0.00026	7.45484
109	3973	100	3.52192	0.00356	3.51836					109	3968.82	99.89	7.42441	0.01986	7.40455
110	3950.78	99.44	3.88292	0.00925	3.87367					110	3973	100	7.43426	0.00671	7.42755
111	3972.5	99.99	2.99012	0.01825	2.97187					111	3970.09	99.93	7.37467	1e-05	7.37466
112	3964.22	99.78	3.43947	0.01794	3.42153					112	3972.35	99.98	7.46785	0.00015	7.4677
113	3966.29	99.83	3.74409	0.02077	3.72332					113	3930.45	98.93	7.46214	0.02332	7.43882
114	3972.03	99.98	3.9262	0.01747	3.90873					114	3963.09	99.75	7.41016	0.01864	7.39152
115	3966.86	99.85	3.49869	0.02102	3.47767					115	3973	100	7.46843	0.00012	7.46831
116	3968.36	99.88	3.79908	0.01984	3.77924					116	3971.98	99.97	7.46948	0.01963	7.44985
117	3968.47	99.89	3.82605	0.01454	3.81151					117	3950.19	99.43	7.45985	0.01972	7.44013
118	3929.05	98.89	3.76665	0.00273	3.76392					118	3968.88	99.9	7.42204	1e-05	7.42203
119	3954.4	99.53	3.81175	0.01891	3.79284					119	3969.91	99.92	7.44288	0.01638	7.4265
120	3972.5	99.99	3.63372	0.01533	3.61839					120	3970.09	99.93	7.43515	0.00128	7.43387
121	3966.86	99.85	4.34583	0.01171	4.33412					121	3972.03	99.98	7.46541	0.00031	7.4651
122	3965.7	99.82	3.8848	0.02036	3.86444					122	3969.39	99.91	7.44129	0.0024	7.43889
123	3972.03	99.98	3.44852	0.01683	3.43169					123	3949.75	99.41	7.46437	0.0186	7.44577
124	3970.95	99.95	3.30123	0.01184	3.28939					124	3955.95	99.57	7.42214	0.01913	7.40301
125	3972.03	99.98	3.35822	0.00683	3.35139					125	3962.68	99.74	7.47077	0.01908	7.45169
126	3955.55	99.56	4.07965	0.02011	4.05954					126	3969.39	99.91	7.43772	0.00099	7.43673
127	3962.15	99.73	3.68589	0.01943	3.66646					127	3971.98	99.97	7.46695	8e-05	7.46687
128	3964.92	99.8	3.75853	0.01343	3.7451					128	3972.5	99.99	7.4673	0.00032	7.46698
129	3973.01	100	3.97843	0.00273	3.9757					129	3970.41	99.93	7.45488	5e-05	7.45483
130	3968.36	99.88	3.72461	0.01042	3.71419					130	3967.35	99.86	7.46865	0.01946	7.44919
131	3966.53	99.84	2.82314	0.02	2.80314					131	3966.86	99.85	7.41924	0.00947	7.40977
132	3967.84	99.87	3.01528	0.01869	2.99659					132	3966.29	99.83	7.45943	0.00057	7.45886
133	3963.71	99.77	3.98518	0.02093	3.96425					133	3965.24	99.8	7.4434	5e-05	7.44335
134	3951.99	99.47	3.30183	0.0053	3.29653					134	3971.46	99.96	7.45468	0.0215	7.43318
135	3957.81	99.62	4.15905	0.01545	4.1436					135	3970.41	99.93	7.4627	0.00013	7.46257
136	3921.31	98.7	3.11978	0.02194	3.09784					136	3969.76	99.92	7.46385	0.0002	7.46365
137	3972.67	99.99	3.81604	0.01916	3.79688					137	3962.67	99.74	7.45991	0.01805	7.44186
138	3949.22	99.4	2.75026	0.01969	2.73057					138	3963.79	99.77	7.43985	0.02273	7.41712
139	3945.61	99.31	3.8845	0.01677	3.86773					139	3961.64	99.71	7.46408	0.01552	7.44856
140	3966.88	99.85	3.66655	0.02042	3.64613					140	3968.36	99.88	7.47211	0.01854	7.45357
141	3972.5	99.99	3.06654	0.02064	3.0459					141	3965.26	99.8	7.46456	0.01822	7.44634
142	3969.58	99.91	3.77794	0.01901	3.75893					142	3951.82	99.47	7.45075	0.0173	7.43345
143	3965.26	99.8	4.05383	0.01494	4.03889					143	3968.36	99.88	7.46258	0.00014	7.46244
144	3970.09	99.93	3.68122	0.0183	3.66292					144	3935.27	99.05	7.46556	0.01951	7.44605
145	3955.04	99.55	3.57497	0.01947	3.5555					145	3968.36	99.88	7.4629	0.00031	7.46259
146	3967.84	99.87	3.91033	0.02009	3.89024					146	3967.33	99.86	7.45682	0.00036	7.45646
147	3972.03	99.98	3.17995	0.01519	3.16476					147	3972.5	99.99	7.46874	0.00028	7.46846
148	3970.41	99.93	3.40118	0.00295	3.39823					148	3968.36	99.88	7.47073	0.02074	7.44999
149	3970.41	99.93	3.72426	0.02195	3.70231					149	3966.86	99.85	7.42371	0.0001	7.42361
150	3971.06	99.95	3.89192	0.016	3.87592					150	3964.92	99.8	7.46231	3e-05	7.46228
151	3947.26	99.35	3.71926	0.02076	3.6985					151	3972.35	99.98	7.46525	0.00038	7.46487
152	3964.22	99.78	3.74651	0.01882	3.72769					152	3972.67	99.99	7.46719	9e-05	7.4671
153	3970.95	99.95	2.83421	0.0216	2.81261					153	3971.06	99.95	7.4647	0.00019	7.46451
154	3972.03	99.98	4.12805	0.01918	4.10887					154	3972.67	99.99	7.45756	0.00014	7.45742
155	3962.77	99.74	3.22094	0.02003	3.20091					155	3970.73	99.94	7.45426	0.00022	7.45404
156	3881.51	97.7	4.0851	0.01781	4.06729					156	3972.03	99.98	7.43069	4e-05	7.43065
157	3948.11	99.37	3.43283	0.00851	3.42432					157	3962.77	99.74	7.47053	0.01873	7.4518
158	3951.67	99.46	3.70894	0.01794	3.691					158	3968.8	99.89	7.44819	0.00014	7.44805
159	3970.09	99.93	3.53701	0.00325	3.53376					159	3962.67	99.74	7.45291	0.00046	7.45245
160	3963.19	99.75	4.00635	0.01693	3.98942					160	3968.88	99.9	7.46567	0.00033	7.46534
161	3966.53	99.84	3.73914	0.00557	3.73357					161	3968.88	99.9	7.4714	0.00011	7.47129
162	3958.54	99.64	4.57017	0.01824	4.55193					162	3966.86	99.85	7.46598	5e-05	7.46593
163	3972.35	99.98	2.49346	0.00653	2.48693					163	3972.03	99.98	7.46064	0.00013	7.46051
164	3969.91	99.92	2.75326	0.01796	2.7353					164	3970.09	99.93	7.45545	0.00018	7.45527
165	3963.97	99.77	3.30828	0.01701	3.29127					165	3923.88	98.76	7.46689	0.00012	7.46677
166	3972.67	99.99	2.88105	0.00829	2.87276					166	3968.36	99.88	7.42974	0.00106	7.42868
167	3970.73	99.94	2.59422	0.0036	2.59062					167	3967.84	99.87	7.46575	0.00013	7.46562
168	3968.88	99.9	3.73541	0.00835	3.72706					168	3957.28	99.6	7.46305	0.02131	7.44174
169	3970.73	99.94	2.98269	0.01858	2.96411					169	3972.03	99.98	7.46828	0.00035	7.46793
170	3972.35	99.98	3.64407	0.00587	3.6382					170	3960.72	99.69	7.46554	0.00044	7.4651
171	3972.5	99.99	4.14774	0.01927	4.12847					171	3970.73	99.94	7.46911	9e-05	7.46902
172	3952.85	99.49	3.70492	0.02027	3.68465					172	3965.91	99.82	7.46367	0.0183	7.44537
173	3971.98	99.97	3.26332	0.00293	3.26039					173	3963.33	99.76	7.44001	0.01731	7.4227
174	3971.46	99.96	3.15708	0.00612	3.15096					174	3952.33	99.48	7.41772	0.01934	7.39838
175	3956.95	99.6	3.54758	0.017	3.53058					175	3964.92	99.8	7.43912	0.00024	7.43888
176	3945.2	99.3	3.10334	0.01833	3.08501					176	3968.88	99.9	7.47191	0.0194	7.45251
177	3963	99.75	4.00484	0.01661	3.98823					177	3940.95	99.19	7.46123	0.01853	7.4427
178	3972.67	99.99	4.13479	0.01014	4.12465					178	3968.36	99.88	7.47368	4e-05	7.47364
179	3971.46	99.96	3.56866	0.02075	3.54791					179	3972.5	99.99	7.46019	0.00039	7.4598
180	3970.73	99.94	3.53206	0.01394	3.51812					180	3962.67	99.74	7.45804	0.02186	7.43618
181	3967.5	99.86	3.92674	0.01644	3.9103					181	3967.84	99.87	7.4577	8e-05	7.45762
182	3971.46	99.96	3.88053	0.00807	3.87246					182	3966.21	99.83	7.4584	0.00141	7.45699
183	3970.09	99.93	2.89162	0.02172	2.8699					183	3959.1	99.65	7.46525	0.00066	7.46459
184	3952.85	99.49	3.68921	0.01936	3.66985					184	3954.19	99.53	7.454	0.01498	7.43902
185	3945.1	99.3	3.80791	0.01863	3.78928					185	3969.14	99.9	7.45857	0.02096	7.43761
186	3973.01	100	3.72032	0.01858	3.70174					186	3960.09	99.67	7.46576	0.00012	7.46564
187	3973	100	3.4168	0.00344	3.41336					187	3971.98	99.97	7.47538	0.00012	7.47526
188	3970.41	99.93	3.12439	0.01385	3.11054					188	3972.67	99.99	7.46352	0.00057	7.46295
189	3964.22	99.78	3.43387	0.01695	3.41692					189	3940.44	99.18	7.46095	0.02071	7.44024
190	3958.54	99.64	3.52427	0.00907	3.5152					190	3931.14	98.95	7.43839	0.02288	7.41551
191	3953.37	99.51	3.67017	0.02034	3.64983					191	3970.09	99.93	7.46903	4e-05	7.46899
192	3906.32	98.32	3.93842	0.02049	3.91793					192	3946.13	99.32	7.47557	0.01933	7.45624
193	3967.5	99.86	3.6876	0.00443	3.68317					193	3967.5	99.86	7.44944	0.0007	7.44874
194	3971.46	99.96	3.27158	0.02206	3.24952					194	3967.33	99.86	7.45907	0.00015	7.45892
195	3962.67	99.74	3.89476	0.01906	3.8757					195	3970.41	99.93	7.4576	3e-05	7.45757
196	3927	98.84	4.19548	0.01752	4.17796					196	3969.12	99.9	7.4626	1e-05	7.46259
197	3950.27	99.43	4.09992	0.01842	4.0815					197	3962.77	99.74	7.41486	0.01685	7.39801
198	3972.03	99.98	3.6867	0.0221	3.6646					198	3968.88	99.9	7.35834	0.01909	7.33925
199	3971.46	99.96	3.36934	0.00148	3.36786					199	3966.86	99.85	7.45743	8e-05	7.45735
200	3962.67	99.74	3.99668	0.01971						200	3973	100	7.43489	7e-05	7.43482

## Sheet: 08_ACOA_Seeds(225)
Fast Converegnce Exp							Fast Converegnce Exp			Slow Converegnce Exp							Slow Converegnce Exp
#	CBLF	Quality	Taumax	Taumin	DeltaTauminmax		Global Optimal Solution =	3973.01		#	CBLF	Quality	Taumax	Taumin	DeltaTauminmax		Global Optimal Solution =	3973.01
1	3933.57	99.01	3.79098	0.00529	3.78569		Minimum Optimal Solution =	3781.73		1	3933.57	99.01	7.47008	4e-05	7.47004		Minimum Optimal Solution =	3819.98
2	3963.19	99.75	4.22897	0.01657	4.2124		Mean of Optimal Solution =	3958.71		2	3965.78	99.82	7.45423	0.0008	7.45343		Mean of Optimal Solution =	3961.57
3	3942.06	99.22	3.52264	0.01877	3.50387		Median of Optimal Solution=	3958.71		3	3971.85	99.97	7.46779	0.01594	7.45185		Median of Optimal Solution =	3961.57
4	3937.34	99.1	3.78888	0.01956	3.76932		Solution Standrad Deviation =	21.9241		4	3972.67	99.99	7.45885	3e-05	7.45882		Solution Standrad Deviation =	17.2731
5	3951.49	99.46	3.43167	0.02133	3.41034		Average Price =	18.98		5	3928.35	98.88	7.45819	0.02182	7.43637		Average Price =	66.45
6	3970.73	99.94	3.88955	0.01872	3.87083		Relability =	34.5		6	3958.89	99.64	7.33579	0.01845	7.31734		Relability =	45
7	3972.35	99.98	3.02562	0.01485	3.01077		Normalized Price =	55.0145		7	3971.46	99.96	7.46533	0.00031	7.46502		Normalized Price =	147.667
8	3962.16	99.73	4.17748	0.01892	4.15856		Average Solution Quality =	99.6401		8	3973	100	7.44703	8e-05	7.44695		Average Solution Quality =	99.7121
9	3931.14	98.95	3.64621	0.0189	3.62731		Average FDC =	-131.524		9	3961.64	99.71	7.46673	0.00106	7.46567		Average FDC =	-48.1158
10	3959.57	99.66	3.14426	0.01872	3.12554		Correlation Coefficent =	-0.79411		10	3972.5	99.99	7.46	0.00043	7.45957		Correlation Coefficent =	-0.83298
11	3952.85	99.49	3.12669	0.01973	3.10696		Solution Robustness =	180.564		11	3967.84	99.87	7.4612	0.01852	7.44268		Solution Robustness =	229.349
12	3962.67	99.74	3.67099	0.01709	3.6539		Performance Rate =	0.018177		12	3965.7	99.82	7.45863	0.02022	7.43841		Performance Rate =	0.006772
13	3953.89	99.52	3.47302	0.02126	3.45176		Average Elapsed Time =	0.86787		13	3971.46	99.96	7.42316	1e-05	7.42315		Average Elapsed Time =	3.0232
14	3971.06	99.95	4.03686	0.01001	4.02685					14	3969.76	99.92	7.46899	3e-05	7.46896
15	3972.03	99.98	4.23418	0.01689	4.21729					15	3971.98	99.97	7.46222	0.00033	7.46189
16	3971.38	99.96	4.21643	0.01863	4.1978					16	3913.56	98.5	7.43763	0.0199	7.41773
17	3953.37	99.51	2.7795	0.02051	2.75899					17	3958.54	99.64	7.46936	0.02023	7.44913
18	3970.41	99.93	3.65561	0.00981	3.6458					18	3966.56	99.84	7.46903	0.01753	7.4515
19	3972.03	99.98	3.844	0.01823	3.82577					19	3972.67	99.99	7.4617	2e-05	7.46168
20	3940.44	99.18	4.24357	0.0178	4.22577					20	3967.97	99.87	7.44962	0.01461	7.43501
21	3964.22	99.78	3.87196	0.01723	3.85473					21	3926.23	98.82	7.45217	0.02167	7.4305
22	3971.06	99.95	3.1263	0.01558	3.11072					22	3968.88	99.9	7.44419	0.00297	7.44122
23	3971.46	99.96	3.43157	0.01708	3.41449					23	3968.36	99.88	7.46943	0.00015	7.46928
24	3970.41	99.93	4.19768	0.0169	4.18078					24	3971.98	99.97	7.45545	0.00014	7.45531
25	3966.86	99.85	3.77045	0.01912	3.75133					25	3968.88	99.9	7.46781	6e-05	7.46775
26	3972.03	99.98	3.73713	0.02073	3.7164					26	3964.59	99.79	7.46831	4e-05	7.46827
27	3971.06	99.95	3.45182	0.02315	3.42867					27	3931.65	98.96	7.4709	0.01819	7.45271
28	3970.41	99.93	1.76978	0.01163	1.75815					28	3969.44	99.91	7.4721	0.00018	7.47192
29	3972.35	99.98	3.91444	0.01707	3.89737					29	3962.67	99.74	7.46497	0.0002	7.46477
30	3969.58	99.91	3.17247	0.0197	3.15277					30	3970.95	99.95	7.44062	0.01972	7.4209
31	3960.72	99.69	3.68984	0.01739	3.67245					31	3972.35	99.98	7.45948	0.00024	7.45924
32	3966.21	99.83	3.59622	0.01627	3.57995					32	3938.09	99.12	7.46996	0.00013	7.46983
33	3968.36	99.88	3.90462	0.01894	3.88568					33	3970.73	99.94	7.46439	0	7.46439
34	3967.33	99.86	3.53923	0.0086	3.53063					34	3968.88	99.9	7.46263	0.00032	7.46231
35	3955.44	99.56	3.15682	0.0197	3.13712					35	3970.41	99.93	7.46322	0.00014	7.46308
36	3970.41	99.93	3.24642	0.02147	3.22495					36	3946.65	99.34	7.45181	0.02142	7.43039
37	3925.32	98.8	3.42232	0.01916	3.40316					37	3971.85	99.97	7.47039	0.01494	7.45545
38	3951.34	99.45	4.20006	0.0076	4.19246					38	3973	100	7.45589	0.00018	7.45571
39	3965.24	99.8	2.0832	0.02037	2.06283					39	3959.05	99.65	7.41498	0.00594	7.40904
40	3956.84	99.59	3.29679	0.01926	3.27753					40	3952.57	99.49	7.44648	0.0194	7.42708
41	3972.67	99.99	3.46554	0.02039	3.44515					41	3971.98	99.97	7.37926	0.00483	7.37443
42	3964.92	99.8	3.75551	0.01671	3.7388					42	3969.76	99.92	7.44325	9e-05	7.44316
43	3970.09	99.93	2.94956	0.01949	2.93007					43	3971.46	99.96	7.46279	0.00029	7.4625
44	3969.76	99.92	2.20004	0.01769	2.18235					44	3972.67	99.99	7.42843	4e-05	7.42839
45	3952.85	99.49	3.45639	0.02194	3.43445					45	3972.67	99.99	7.46106	0.00126	7.4598
46	3968.88	99.9	3.71929	0.01754	3.70175					46	3970.41	99.93	7.45294	0.00063	7.45231
47	3968.36	99.88	3.81364	0.01948	3.79416					47	3949.41	99.41	7.47088	0.00013	7.47075
48	3955.55	99.56	3.03912	0.01047	3.02865					48	3898.57	98.13	7.46302	0.02042	7.4426
49	3970.95	99.95	3.26747	0.01822	3.24925					49	3972.35	99.98	7.46427	0.00012	7.46415
50	3949.75	99.41	3.24144	0.01851	3.22293					50	3968.88	99.9	7.43484	0.00441	7.43043
51	3959.57	99.66	3.7131	0.02119	3.69191					51	3964.74	99.79	7.4712	0.01868	7.45252
52	3970.41	99.93	3.26618	0.00235	3.26383					52	3965.78	99.82	7.47175	4e-05	7.47171
53	3966.86	99.85	2.52314	0.02068	2.50246					53	3972.03	99.98	7.45653	0.00036	7.45617
54	3913.56	98.5	3.54476	0.0199	3.52486					54	3959.57	99.66	7.46716	9e-05	7.46707
55	3973	100	3.70853	0.01725	3.69128					55	3968.36	99.88	7.46853	0.01736	7.45117
56	3953.37	99.51	3.579	0.01557	3.56343					56	3971.46	99.96	7.4643	0.00013	7.46417
57	3971.98	99.97	3.83711	0.0108	3.82631					57	3953.28	99.5	7.45854	0.00301	7.45553
58	3970.09	99.93	3.87115	0.01988	3.85127					58	3960.19	99.68	7.46744	0.02079	7.44665
59	3972.5	99.99	2.85372	0.0057	2.84802					59	3955.87	99.57	7.4668	0.00019	7.46661
60	3965.7	99.82	2.87909	0.02192	2.85717					60	3953.52	99.51	7.45047	0.02223	7.42824
61	3942.3	99.23	3.11915	0.01849	3.10066					61	3900.87	98.18	7.47352	0.02037	7.45315
62	3959.57	99.66	3.3722	0.01764	3.35456					62	3966.53	99.84	7.46618	4e-05	7.46614
63	3973.01	100	3.1571	0.01605	3.14105					63	3924.93	98.79	7.46437	0.02053	7.44384
64	3966.21	99.83	3.61159	0.02163	3.58996					64	3957.81	99.62	7.4323	0.00272	7.42958
65	3948.9	99.39	4.14272	0.01971	4.12301					65	3963.77	99.77	7.4206	0.02227	7.39833
66	3971.98	99.97	3.79058	0.0036	3.78698					66	3953.28	99.5	7.47	1e-05	7.46999
67	3968.88	99.9	4.16894	0.02032	4.14862					67	3962.66	99.74	7.46864	0.0004	7.46824
68	3972.35	99.98	3.30119	0.01923	3.28196					68	3957.48	99.61	7.44092	2e-05	7.4409
69	3971.98	99.97	4.01937	0.01957	3.9998					69	3972.17	99.98	7.46067	0.01541	7.44526
70	3928.55	98.88	3.91687	0.0203	3.89657					70	3972.03	99.98	7.4618	0.00156	7.46024
71	3966.35	99.83	3.5912	0.01964	3.57156					71	3971.98	99.97	7.44065	0.00481	7.43584
72	3952.85	99.49	3.5019	0.01852	3.48338					72	3971.46	99.96	7.4622	3e-05	7.46217
73	3964.59	99.79	2.02325	0.02108	2.00217					73	3966.21	99.83	7.46241	0.00049	7.46192
74	3972.5	99.99	3.68705	0.00761	3.67944					74	3953.61	99.51	7.46484	0.00012	7.46472
75	3972.67	99.99	3.71271	0.01676	3.69595					75	3971.98	99.97	7.37388	0.00596	7.36792
76	3935.83	99.06	4.10296	0.02014	4.08282					76	3954.92	99.54	7.33937	0.01945	7.31992
77	3972.35	99.98	2.60967	0.02088	2.58879					77	3962.77	99.74	7.47001	0.01975	7.45026
78	3968.5	99.89	4.08043	0.0186	4.06183					78	3949.73	99.41	7.45788	0.00129	7.45659
79	3968.36	99.88	3.88003	0.01573	3.8643					79	3962.67	99.74	7.41383	0.00014	7.41369
80	3968.15	99.88	3.40278	0.01175	3.39103					80	3939.93	99.17	7.38003	0.01758	7.36245
81	3940.03	99.17	3.94277	0.00916	3.93361					81	3972.67	99.99	7.4696	0.00033	7.46927
82	3973	100	3.54477	0.01251	3.53226					82	3972.5	99.99	7.465	0.00012	7.46488
83	3973.01	100	3.67045	0.0006	3.66985					83	3973.01	100	7.46445	0.0004	7.46405
84	3948.58	99.39	4.047	0.01596	4.03104					84	3965.24	99.8	7.46951	0.00016	7.46935
85	3955.87	99.57	3.62161	0.01162	3.60999					85	3972.35	99.98	7.45797	0.00113	7.45684
86	3968.88	99.9	3.72607	0.00797	3.7181					86	3970.73	99.94	7.44136	0.00241	7.43895
87	3918.7	98.63	3.97063	0.02093	3.9497					87	3966.53	99.84	7.42903	0.00031	7.42872
88	3968.88	99.9	3.41653	0.01799	3.39854					88	3955.87	99.57	7.47114	8e-05	7.47106
89	3960.39	99.68	3.75043	0.01746	3.73297					89	3969.12	99.9	7.46338	0.00017	7.46321
90	3943.55	99.26	3.17277	0.01972	3.15305					90	3952.96	99.5	7.42977	0.00614	7.42363
91	3970.09	99.93	3.57566	0.01771	3.55795					91	3955.55	99.56	7.45985	3e-05	7.45982
92	3968.15	99.88	3.27468	0.01078	3.2639					92	3972.35	99.98	7.47097	0.00029	7.47068
93	3953.93	99.52	3.63159	0.00801	3.62358					93	3972.5	99.99	7.46171	0	7.46171
94	3930.62	98.93	4.11085	0.01847	4.09238					94	3972.35	99.98	7.4333	0.00071	7.43259
95	3967.84	99.87	3.69837	0.01552	3.68285					95	3962.67	99.74	7.46741	0.00047	7.46694
96	3967.18	99.85	3.98622	0.01665	3.96957					96	3933.72	99.01	7.45517	0.01899	7.43618
97	3972.03	99.98	3.92286	0.00992	3.91294					97	3972.67	99.99	7.4514	0.0004	7.451
98	3961.04	99.7	2.53988	0.00303	2.53685					98	3941	99.19	7.46602	2e-05	7.466
99	3967.85	99.87	2.179	0.02081	2.15819					99	3967.85	99.87	7.46461	0.0248	7.43981
100	3951.99	99.47	3.69064	0.0104	3.68024					100	3971.46	99.96	7.38358	0.01407	7.36951
101	3972.35	99.98	4.04199	0.01676	4.02523					101	3962.98	99.75	7.45769	8e-05	7.45761
102	3908.33	98.37	2.82587	0.02033	2.80554					102	3951.3	99.45	7.35814	0.02086	7.33728
103	3971.98	99.97	3.59085	0.0173	3.57355					103	3972.5	99.99	7.32442	0.01517	7.30925
104	3952.85	99.49	3.88795	0.02219	3.86576					104	3973	100	7.46746	6e-05	7.4674
105	3969.76	99.92	3.40531	0.01918	3.38613					105	3965.24	99.8	7.46469	0.00041	7.46428
106	3962.98	99.75	3.77789	0.02153	3.75636					106	3972.5	99.99	7.38986	2e-05	7.38984
107	3969.12	99.9	2.22421	0.02063	2.20358					107	3971.46	99.96	7.46334	0.00106	7.46228
108	3968.36	99.88	3.04366	0.00811	3.03555					108	3968.36	99.88	7.46868	6e-05	7.46862
109	3973	100	3.58066	0.01937	3.56129					109	3941.97	99.22	7.462	9e-05	7.46191
110	3972.35	99.98	3.29588	0.01917	3.27671					110	3973.01	100	7.46211	0.00049	7.46162
111	3963.19	99.75	3.17768	0.01754	3.16014					111	3961.36	99.71	7.46329	5e-05	7.46324
112	3947.47	99.36	4.032	0.00701	4.02499					112	3972.35	99.98	7.45558	3e-05	7.45555
113	3973	100	2.73566	0.00493	2.73073					113	3972.35	99.98	7.46287	0.00011	7.46276
114	3920.66	98.68	3.65192	0.01997	3.63195					114	3943.61	99.26	7.46534	0.02346	7.44188
115	3929.05	98.89	3.34906	0.01764	3.33142					115	3973.01	100	7.36679	0.00072	7.36607
116	3838.6	96.62	3.64957	0.01846	3.63111					116	3959.05	99.65	7.46081	0.02042	7.44039
117	3955.95	99.57	3.60037	0.01995	3.58042					117	3963.3	99.76	7.45669	0.00026	7.45643
118	3949.73	99.41	3.37482	0.01484	3.35998					118	3952.85	99.49	7.46701	0.015	7.45201
119	3969.39	99.91	3.02381	0.01715	3.00666					119	3972.35	99.98	7.46909	7e-05	7.46902
120	3964.92	99.8	3.69209	0.01543	3.67666					120	3966.86	99.85	7.46484	0.00064	7.4642
121	3972.5	99.99	3.8039	0.02052	3.78338					121	3963.97	99.77	7.3685	0.01819	7.35031
122	3958.02	99.62	3.7043	0.02191	3.68239					122	3970.41	99.93	7.46406	9e-05	7.46397
123	3953.28	99.5	3.93822	0.01877	3.91945					123	3959.57	99.66	7.40495	0.00876	7.39619
124	3967.84	99.87	3.3278	0.02144	3.30636					124	3949.73	99.41	7.47015	7e-05	7.47008
125	3955.55	99.56	3.93312	0.01117	3.92195					125	3950.27	99.43	7.46805	0.00012	7.46793
126	3953.37	99.51	3.80461	0.01463	3.78998					126	3960.51	99.69	7.44587	0.0185	7.42737
127	3965.78	99.82	2.80103	0.01779	2.78324					127	3961.39	99.71	7.47127	0.01957	7.4517
128	3971.46	99.96	3.61115	0.01725	3.5939					128	3966.53	99.84	7.35018	0	7.35018
129	3965.41	99.81	3.85529	0.01662	3.83867					129	3925.45	98.8	7.46459	0.02115	7.44344
130	3970.09	99.93	3.53378	0.01162	3.52216					130	3969.39	99.91	7.46839	1e-05	7.46838
131	3968.8	99.89	3.1354	0.01135	3.12405					131	3970.41	99.93	7.46175	0.0009	7.46085
132	3962.16	99.73	3.8224	0.01967	3.80273					132	3972.67	99.99	7.43847	0.00038	7.43809
133	3962.15	99.73	3.28905	0.01954	3.26951					133	3972.67	99.99	7.44698	4e-05	7.44694
134	3970.95	99.95	3.9948	0.01907	3.97573					134	3964.62	99.79	7.45268	0.0186	7.43408
135	3967.33	99.86	3.40861	0.02033	3.38828					135	3972.5	99.99	7.42687	7e-05	7.4268
136	3965.26	99.8	3.18047	0.01954	3.16093					136	3973	100	7.44621	0.0001	7.44611
137	3902.87	98.23	2.80628	0.01876	2.78752					137	3902.7	98.23	7.47149	0.02211	7.44938
138	3964.74	99.79	3.07632	0.01063	3.06569					138	3959.1	99.65	7.46725	0.00015	7.4671
139	3967.18	99.85	3.64157	0.0036	3.63797					139	3973	100	7.46889	8e-05	7.46881
140	3855.14	97.03	4.15138	0.01683	4.13455					140	3970.73	99.94	7.46423	0.00016	7.46407
141	3961.36	99.71	3.23031	0.01466	3.21565					141	3947.16	99.35	7.46173	0.0187	7.44303
142	3939.41	99.15	3.45185	0.01752	3.43433					142	3959.05	99.65	7.46025	0.00025	7.46
143	3970.95	99.95	2.46057	0.02038	2.44019					143	3972.5	99.99	7.46794	0.00027	7.46767
144	3952.78	99.49	3.2966	0.0175	3.2791					144	3967.84	99.87	7.45783	3e-05	7.4578
145	3972.03	99.98	3.10118	0.01712	3.08406					145	3971.46	99.96	7.45072	0.00017	7.45055
146	3973.01	100	3.68255	0.01649	3.66606					146	3958.54	99.64	7.41347	0.02297	7.3905
147	3960.19	99.68	3.74597	0.01936	3.72661					147	3972.03	99.98	7.46127	0.00045	7.46082
148	3972.67	99.99	1.283	0.01766	1.26534					148	3970.73	99.94	7.40737	5e-05	7.40732
149	3970.73	99.94	3.69399	0.00991	3.68408					149	3969.44	99.91	7.46507	0.00038	7.46469
150	3947.79	99.37	3.38273	0.00581	3.37692					150	3968.36	99.88	7.34835	0.01424	7.33411
151	3966.86	99.85	3.58067	0.0178	3.56287					151	3931.14	98.95	7.45579	0.01844	7.43735
152	3969.39	99.91	3.85301	0.00761	3.8454					152	3972.67	99.99	7.45546	0.00039	7.45507
153	3968.36	99.88	2.58244	0.01959	2.56285					153	3972.35	99.98	7.46787	3e-05	7.46784
154	3924.21	98.77	2.5948	0.01529	2.57951					154	3972.67	99.99	7.46982	0.0001	7.46972
155	3962.5	99.74	3.75659	0.0174	3.73919					155	3968.36	99.88	7.46663	0.02217	7.44446
156	3972.35	99.98	3.8016	0.01088	3.79072					156	3963.3	99.76	7.46804	8e-05	7.46796
157	3970.43	99.94	3.63909	0.02042	3.61867					157	3968.15	99.88	7.4595	0.00039	7.45911
158	3962.77	99.74	3.78868	0.01844	3.77024					158	3973.01	100	7.40327	0.00473	7.39854
159	3971.38	99.96	2.30635	0.02109	2.28526					159	3973	100	7.46038	0.00018	7.4602
160	3959.57	99.66	3.88063	0.02133	3.8593					160	3943.91	99.27	7.45746	0.00018	7.45728
161	3940.44	99.18	2.72691	0.02165	2.70526					161	3972.5	99.99	7.46797	0.00029	7.46768
162	3781.73	95.19	4.11535	0.01938	4.09597					162	3957.83	99.62	7.40132	0.01969	7.38163
163	3972.67	99.99	2.77001	0.01736	2.75265					163	3969.91	99.92	7.45967	0.00012	7.45955
164	3972.35	99.98	3.64492	0.01829	3.62663					164	3971.06	99.95	7.46339	0.00017	7.46322
165	3968.88	99.9	3.72699	0.01956	3.70743					165	3972.67	99.99	7.46873	0.0001	7.46863
166	3969.39	99.91	3.95375	0.02038	3.93337					166	3960.24	99.68	7.46812	0.01904	7.44908
167	3941.97	99.22	3.43807	0.0184	3.41967					167	3969.58	99.91	7.46683	0.01798	7.44885
168	3970.95	99.95	3.45239	0.00478	3.44761					168	3971.85	99.97	7.43525	0.01722	7.41803
169	3939.66	99.16	3.65042	0.02163	3.62879					169	3972.35	99.98	7.46048	0.00071	7.45977
170	3967.84	99.87	3.07374	0.00413	3.06961					170	3963.71	99.77	7.44877	0.02186	7.42691
171	3971.46	99.96	4.29758	0.00499	4.29259					171	3971.06	99.95	7.46157	0.00017	7.4614
172	3960.39	99.68	3.6063	0.01913	3.58717					172	3942.09	99.22	7.44627	0.01757	7.4287
173	3965.56	99.81	3.29755	0.01815	3.2794					173	3969.76	99.92	7.45103	7e-05	7.45096
174	3971.98	99.97	3.3281	0.0036	3.3245					174	3949.73	99.41	7.46724	7e-05	7.46717
175	3959.05	99.65	3.83145	0.01729	3.81416					175	3972.67	99.99	7.45607	0.00022	7.45585
176	3920.11	98.67	4.06299	0.0184	4.04459					176	3935.27	99.05	7.46561	0.00051	7.4651
177	3961.04	99.7	3.78927	0.00831	3.78096					177	3970.09	99.93	7.4581	0.00236	7.45574
178	3959.05	99.65	3.92005	0.0211	3.89895					178	3970.41	99.93	7.46715	0.00011	7.46704
179	3963.71	99.77	3.04592	0.0036	3.04232					179	3973	100	7.464	0.00013	7.46387
180	3962.16	99.73	3.86423	0.00635	3.85788					180	3958.78	99.64	7.46649	0.00011	7.46638
181	3970.09	99.93	3.79722	0.01195	3.78527					181	3945.7	99.31	7.46248	0.01848	7.444
182	3970.95	99.95	3.83149	0.01739	3.8141					182	3963.3	99.76	7.43251	0.00173	7.43078
183	3943.91	99.27	4.1154	0.00796	4.10744					183	3960.61	99.69	7.47021	0.00011	7.4701
184	3960.51	99.69	3.64509	0.01963	3.62546					184	3970.95	99.95	7.46412	0.01891	7.44521
185	3953.05	99.5	3.76805	0.02125	3.7468					185	3932.28	98.97	7.46037	0.00102	7.45935
186	3968.36	99.88	3.52955	0.01948	3.51007					186	3957.16	99.6	7.46895	9e-05	7.46886
187	3969.91	99.92	3.27138	0.01378	3.2576					187	3972.35	99.98	7.47044	0.00024	7.4702
188	3968.36	99.88	2.33558	0.01827	2.31731					188	3966.88	99.85	7.46028	0.01816	7.44212
189	3959.05	99.65	3.61637	0.01434	3.60203					189	3819.98	96.15	7.46505	0.0211	7.44395
190	3973.01	100	3.76613	0.0042	3.76193					190	3962.98	99.75	7.4622	0.0003	7.4619
191	3954.51	99.53	3.84897	0.02046	3.82851					191	3958.54	99.64	7.44746	0.01815	7.42931
192	3956.84	99.59	3.81434	0.00973	3.80461					192	3961.04	99.7	7.45426	3e-05	7.45423
193	3962.98	99.75	3.44227	0.01998	3.42229					193	3962.98	99.75	7.46373	0.00023	7.4635
194	3959.05	99.65	2.54892	0.02017	2.52875					194	3939.5	99.16	7.47007	0.01955	7.45052
195	3952.46	99.48	3.89936	0.01783	3.88153					195	3970.41	99.93	7.46665	4e-05	7.46661
196	3952.8	99.49	3.99913	0.01836	3.98077					196	3970.09	99.93	7.4531	0.00056	7.45254
197	3972.35	99.98	3.86205	0.00992	3.85213					197	3970.41	99.93	7.47445	0.00013	7.47432
198	3968.88	99.9	4.07251	0.01632	4.05619					198	3961.39	99.71	7.44446	0.01881	7.42565
199	3972.5	99.99	2.68641	0.01081	2.6756					199	3971.2	99.95	7.45663	0.02002	7.43661
200	3931.65	98.96	3.68446	0.01789	3.66657					200	3972.5	99.99	7.467	0.00025	7.46675

## Sheet: 09_ACOA_Seeds(11)
Fast Converegnce Exp							Fast Converegnce Exp			Slow Converegnce Exp							Slow Converegnce Exp
#	CBLF	Quality	Taumax	Taumin	DeltaTauminmax		Global Optimal Solution =	3973.01		#	CBLF	Quality	Taumax	Taumin	DeltaTauminmax		Global Optimal Solution =	3973.01
1	3966.86	99.85	4.17978	0.01753	4.16225		Minimum Optimal Solution =	3862.92		1	3966.86	99.85	7.47023	0.00022	7.47001		Minimum Optimal Solution =	3782.76
2	3965.78	99.82	3.6029	0.01111	3.59179		Mean of Optimal Solution =	3961.08		2	3937.77	99.11	7.46497	5e-05	7.46492		Mean of Optimal Solution =	3961.57
3	3972.67	99.99	3.30124	0.00658	3.29466		Median of Optimal Solution =	3961.08		3	3970.09	99.93	7.43505	0.00027	7.43478		Median of Optimal Solution =	3961.57
4	3971.98	99.97	4.07744	0.00067	4.07677		Solution Standrad Deviation =	16.3852		4	3972.67	99.99	7.42997	0.00419	7.42578		Solution Standrad Deviation =	19.2279
5	3964.59	99.79	3.75093	0.01532	3.73561		Average Price =	19.2		5	3971.98	99.97	7.44415	0.00032	7.44383		Average Price =	66.635
6	3964.92	99.8	3.56937	0.01308	3.55629		Relability =	36.5		6	3972.35	99.98	7.46093	7e-05	7.46086		Relability =	35.5
7	3971.46	99.96	3.90921	0.01704	3.89217		Normalized Price =	52.6027		7	3968.47	99.89	7.40406	0.00694	7.39712		Normalized Price =	187.704
8	3966.21	99.83	3.51626	0.01419	3.50207		Average Solution Quality =	99.6998		8	3972.67	99.99	7.4327	0.0001	7.4326		Average Solution Quality =	99.712
9	3968.36	99.88	3.85077	0.01885	3.83192		Average FDC =	-118.429		9	3972.5	99.99	7.40429	3e-05	7.40426		Average FDC =	-46.4238
10	3963.71	99.77	3.38234	0.0172	3.36514		Correlation Coefficent =	-0.80546		10	3972.67	99.99	7.46675	3e-05	7.46672		Correlation Coefficent =	-0.83997
11	3955.44	99.56	3.91936	0.02247	3.89689		Solution Robustness =	241.748		11	3962.16	99.73	7.4694	0.00029	7.46911		Solution Robustness =	206.032
12	3966.86	99.85	3.46306	0.02056	3.4425		Performance Rate =	0.01901		12	3972.67	99.99	7.46527	7e-05	7.4652		Performance Rate =	0.0053275
13	3936.31	99.08	3.37933	0.01958	3.35975		Average Elapsed Time =	0.87814		13	3971.85	99.97	7.46076	0.01741	7.44335		Average Elapsed Time =	3.0413
14	3973	100	2.99583	0.0197	2.97613					14	3970.41	99.93	7.45091	3e-05	7.45088
15	3956.84	99.59	3.32356	0.01915	3.30441					15	3971.52	99.96	7.45507	0.01894	7.43613
16	3971.98	99.97	3.63903	0.01842	3.62061					16	3960.61	99.69	7.35547	0.01694	7.33853
17	3866.51	97.32	3.31906	0.01411	3.30495					17	3965.78	99.82	7.44839	0.01573	7.43266
18	3971.98	99.97	3.48138	0.01982	3.46156					18	3972.35	99.98	7.38117	3e-05	7.38114
19	3971.46	99.96	3.80803	0.01758	3.79045					19	3951.67	99.46	7.47058	0.00039	7.47019
20	3970.95	99.95	3.68617	0.02046	3.66571					20	3969.76	99.92	7.46488	0.00049	7.46439
21	3963.71	99.77	3.87632	0.01696	3.85936					21	3972.35	99.98	7.47079	9e-05	7.4707
22	3862.92	97.23	2.66536	0.01992	2.64544					22	3960.51	99.69	7.47171	0.01947	7.45224
23	3972.67	99.99	4.01729	0.00639	4.0109					23	3961.94	99.72	7.45053	0.02045	7.43008
24	3972.03	99.98	3.35051	0.01897	3.33154					24	3966.86	99.85	7.45361	0.00042	7.45319
25	3970.73	99.94	3.54967	0.02141	3.52826					25	3962.66	99.74	7.46791	0.00012	7.46779
26	3963.19	99.75	3.47439	0.01911	3.45528					26	3971.52	99.96	7.45367	0.01933	7.43434
27	3968.36	99.88	3.38594	0.00418	3.38176					27	3965.56	99.81	7.45968	0.00021	7.45947
28	3973	100	3.6333	0.01214	3.62116					28	3967.84	99.87	7.45691	0.01884	7.43807
29	3968.82	99.89	3.73277	0.0215	3.71127					29	3917.2	98.6	7.46443	0.02056	7.44387
30	3972.67	99.99	3.34709	0.01761	3.32948					30	3970.43	99.94	7.44738	4e-05	7.44734
31	3971.06	99.95	3.27021	0.01675	3.25346					31	3952.33	99.48	7.47068	0.01695	7.45373
32	3965.89	99.82	3.48618	0.02322	3.46296					32	3972.35	99.98	7.34277	0.00022	7.34255
33	3957.28	99.6	3.99856	0.01983	3.97873					33	3957.16	99.6	7.46011	0.00015	7.45996
34	3943.55	99.26	3.70628	0.01877	3.68751					34	3972.5	99.99	7.46728	0.0001	7.46718
35	3970.43	99.94	3.89466	0.01037	3.88429					35	3960.72	99.69	7.47241	0.00048	7.47193
36	3930.62	98.93	4.08873	0.01728	4.07145					36	3962.77	99.74	7.46941	0.01754	7.45187
37	3969.58	99.91	3.87092	0.02049	3.85043					37	3927.75	98.86	7.45733	0.0002	7.45713
38	3947.47	99.36	3.82758	0.01769	3.80989					38	3972.03	99.98	7.46832	0.00073	7.46759
39	3970.41	99.93	3.47677	0.01283	3.46394					39	3972.03	99.98	7.45522	0.00056	7.45466
40	3972.35	99.98	3.05579	0.01756	3.03823					40	3971.85	99.97	7.45257	0.01724	7.43533
41	3972.03	99.98	2.96307	0.01788	2.94519					41	3966.86	99.85	7.46536	8e-05	7.46528
42	3969.76	99.92	3.55158	0.00554	3.54604					42	3922.35	98.72	7.46865	0.00013	7.46852
43	3966.53	99.84	2.40513	0.01994	2.38519					43	3972.35	99.98	7.4537	0.0001	7.4536
44	3966.56	99.84	3.77093	0.02099	3.74994					44	3958.45	99.63	7.44353	0.00078	7.44275
45	3962.67	99.74	3.32754	0.0165	3.31104					45	3970.41	99.93	7.45973	0.00033	7.4594
46	3956.66	99.59	3.94263	0.0195	3.92313					46	3969.44	99.91	7.46795	3e-05	7.46792
47	3971.98	99.97	3.6826	0.01622	3.66638					47	3973.01	100	7.46342	0.00035	7.46307
48	3972.35	99.98	3.79009	0.02097	3.76912					48	3963.42	99.76	7.46789	0.01906	7.44883
49	3970.09	99.93	3.22616	0.0155	3.21066					49	3972.67	99.99	7.37903	0.0077	7.37133
50	3949.2	99.4	3.08149	0.02042	3.06107					50	3946.65	99.34	7.46635	8e-05	7.46627
51	3965.26	99.8	3.42415	0.0174	3.40675					51	3972.35	99.98	7.44807	8e-05	7.44799
52	3968.88	99.9	2.48079	0.01591	2.46488					52	3971.46	99.96	7.4669	0.01713	7.44977
53	3973	100	4.15784	0.01205	4.14579					53	3966.53	99.84	7.47171	5e-05	7.47166
54	3970.41	99.93	3.01042	0.01976	2.99066					54	3953.28	99.5	7.47156	0.00037	7.47119
55	3922.7	98.73	4.01768	0.01603	4.00165					55	3899.6	98.15	7.40746	0.0213	7.38616
56	3970.09	99.93	3.75874	0.01577	3.74297					56	3966.21	99.83	7.4369	0.00011	7.43679
57	3968.88	99.9	3.92933	0.00963	3.9197					57	3966.86	99.85	7.4693	0.0002	7.4691
58	3912.01	98.46	3.75486	0.02015	3.73471					58	3970.43	99.94	7.46896	0.0167	7.45226
59	3947.79	99.37	2.79728	0.0032	2.79408					59	3971.46	99.96	7.43159	6e-05	7.43153
60	3952.85	99.49	3.87736	0.01681	3.86055					60	3948.53	99.38	7.46739	0.01767	7.44972
61	3965.24	99.8	3.15063	0.00402	3.14661					61	3971.85	99.97	7.46546	0.01585	7.44961
62	3972.35	99.98	2.7409	0.01303	2.72787					62	3966.21	99.83	7.47219	0.00013	7.47206
63	3963.62	99.76	3.3775	0.01933	3.35817					63	3966.03	99.82	7.45183	0.01643	7.4354
64	3970.41	99.93	3.44252	0.01905	3.42347					64	3937.24	99.1	7.46317	0.01834	7.44483
65	3925.45	98.8	3.7368	0.02256	3.71424					65	3967.64	99.86	7.46744	0.01951	7.44793
66	3962.67	99.74	2.00976	0.0181	1.99166					66	3967.33	99.86	7.45411	0.01894	7.43517
67	3971.85	99.97	3.84021	0.01738	3.82283					67	3967.82	99.87	7.4663	0.00058	7.46572
68	3971.46	99.96	3.39596	0.0036	3.39236					68	3964.92	99.8	7.4477	0.00175	7.44595
69	3964.27	99.78	4.25292	0.01728	4.23564					69	3973	100	7.35257	5e-05	7.35252
70	3941.12	99.2	3.74949	0.02036	3.72913					70	3966.86	99.85	7.47127	3e-05	7.47124
71	3971.98	99.97	3.37381	0.00559	3.36822					71	3973.01	100	7.45016	0.00019	7.44997
72	3953.37	99.51	3.11295	0.01872	3.09423					72	3971.46	99.96	7.42414	3e-05	7.42411
73	3972.35	99.98	4.04644	0.01661	4.02983					73	3962.16	99.73	7.46351	0.01774	7.44577
74	3968.36	99.88	3.83312	0.01666	3.81646					74	3964.92	99.8	7.46077	0.0003	7.46047
75	3962.98	99.75	3.0668	0.02066	3.04614					75	3958.8	99.64	7.46696	0.02048	7.44648
76	3966.53	99.84	3.15556	0.01646	3.1391					76	3972.67	99.99	7.43492	0.00022	7.4347
77	3960.51	99.69	3.03236	0.01751	3.01485					77	3966.56	99.84	7.46938	0.019	7.45038
78	3953.37	99.51	3.9077	0.02041	3.88729					78	3953.28	99.5	7.45962	0.00043	7.45919
79	3964.74	99.79	2.60059	0.01877	2.58182					79	3967.18	99.85	7.46425	0.00014	7.46411
80	3962.33	99.73	3.97881	0.00774	3.97107					80	3968.88	99.9	7.46653	4e-05	7.46649
81	3972.67	99.99	2.34263	0.00699	2.33564					81	3966.53	99.84	7.45423	0.0002	7.45403
82	3958.48	99.63	3.93106	0.0179	3.91316					82	3960.72	99.69	7.45259	0.00393	7.44866
83	3972.35	99.98	3.86842	0.01822	3.8502					83	3967.97	99.87	7.46952	0.01966	7.44986
84	3958.02	99.62	2.99507	0.02045	2.97462					84	3970.73	99.94	7.46017	9e-05	7.46008
85	3957.16	99.6	3.99222	0.0061	3.98612					85	3971.85	99.97	7.47277	0.0174	7.45537
86	3940.96	99.19	3.38367	0.01941	3.36426					86	3966.86	99.85	7.44966	0.00161	7.44805
87	3958.13	99.63	3.28459	0.0208	3.26379					87	3972.35	99.98	7.46987	0.0001	7.46977
88	3953.89	99.52	3.80022	0.00658	3.79364					88	3968.36	99.88	7.46955	7e-05	7.46948
89	3925.45	98.8	3.73242	0.01974	3.71268					89	3971.46	99.96	7.46411	0.00023	7.46388
90	3972.5	99.99	3.40841	0.0115	3.39691					90	3967.2	99.85	7.46982	0.01629	7.45353
91	3966.53	99.84	3.41286	0.02208	3.39078					91	3972.5	99.99	7.46803	0.01783	7.4502
92	3970.95	99.95	2.56572	0.01882	2.5469					92	3900.89	98.18	7.4544	0.01994	7.43446
93	3963.19	99.75	3.64449	0.01945	3.62504					93	3960.53	99.69	7.44204	0.01803	7.42401
94	3969.12	99.9	3.85402	0.02146	3.83256					94	3967.84	99.87	7.46263	0.01891	7.44372
95	3969.44	99.91	3.19822	0.01674	3.18148					95	3963.71	99.77	7.40262	4e-05	7.40258
96	3968.8	99.89	3.10156	0.02049	3.08107					96	3956.95	99.6	7.36136	0.02051	7.34085
97	3969.76	99.92	3.31286	0.0108	3.30206					97	3945.85	99.32	7.42832	4e-05	7.42828
98	3972.35	99.98	3.76261	0.01774	3.74487					98	3968.36	99.88	7.39841	2e-05	7.39839
99	3963.97	99.77	2.53004	0.0201	2.50994					99	3968.8	99.89	7.46038	0.00026	7.46012
100	3926.78	98.84	3.84537	0.00995	3.83542					100	3964.92	99.8	7.39022	0.00072	7.3895
101	3958.13	99.63	3.69975	0.01817	3.68158					101	3973	100	7.46667	7e-05	7.4666
102	3968.88	99.9	3.10305	0.01041	3.09264					102	3972.35	99.98	7.45459	0.00035	7.45424
103	3953.37	99.51	3.58396	0.02065	3.56331					103	3966.86	99.85	7.46887	0.00013	7.46874
104	3949.08	99.4	2.38244	0.01901	2.36343					104	3972.35	99.98	7.47396	0.00015	7.47381
105	3966.86	99.85	3.84727	0.01978	3.82749					105	3940.96	99.19	7.47282	0.0188	7.45402
106	3952.33	99.48	3.99573	0.01695	3.97878					106	3961.68	99.71	7.42001	5e-05	7.41996
107	3971.98	99.97	3.49057	0.01893	3.47164					107	3972.35	99.98	7.46946	0.0001	7.46936
108	3967.5	99.86	3.90618	0.00921	3.89697					108	3952.31	99.48	7.41469	0.00465	7.41004
109	3960.39	99.68	3.32569	0.01764	3.30805					109	3968.8	99.89	7.45553	0.00029	7.45524
110	3943.55	99.26	3.5762	0.01682	3.55938					110	3964.74	99.79	7.45679	0.02119	7.4356
111	3968.36	99.88	4.25543	0.01727	4.23816					111	3962.33	99.73	7.43844	0.0049	7.43354
112	3965.73	99.82	3.19356	0.02053	3.17303					112	3962.16	99.73	7.46319	0.01823	7.44496
113	3972.03	99.98	3.75858	0.01496	3.74362					113	3973	100	7.4194	2e-05	7.41938
114	3968.82	99.89	3.3774	0.01939	3.35801					114	3972.67	99.99	7.46872	0.00015	7.46857
115	3970.09	99.93	3.06609	0.01761	3.04848					115	3968.88	99.9	7.45594	0.00027	7.45567
116	3951.67	99.46	2.5042	0.01682	2.48738					116	3968.47	99.89	7.43954	0.00015	7.43939
117	3971.98	99.97	3.53211	0.01987	3.51224					117	3913.25	98.5	7.41272	0.01909	7.39363
118	3968.36	99.88	3.61525	0.02083	3.59442					118	3970.73	99.94	7.47216	0.00028	7.47188
119	3966.03	99.82	3.92126	0.01699	3.90427					119	3963.19	99.75	7.46977	0.00019	7.46958
120	3960.72	99.69	4.1026	0.01833	4.08427					120	3963	99.75	7.46997	0.02001	7.44996
121	3968.36	99.88	2.78159	0.02059	2.761					121	3956.84	99.59	7.44627	4e-05	7.44623
122	3969.47	99.91	3.26906	0.01979	3.24927					122	3885.12	97.79	7.46537	0.01868	7.44669
123	3949.73	99.41	4.0662	0.01467	4.05153					123	3933.89	99.02	7.46211	0.00016	7.46195
124	3972.35	99.98	3.8561	0.01162	3.84448					124	3967.82	99.87	7.46	0.00014	7.45986
125	3966.24	99.83	3.68872	0.0197	3.66902					125	3972.03	99.98	7.46365	0.00028	7.46337
126	3967.53	99.86	3.68525	0.01817	3.66708					126	3949.73	99.41	7.43718	0.00018	7.437
127	3962.27	99.73	3.07261	0.0218	3.05081					127	3928.03	98.87	7.4727	0.01724	7.45546
128	3946.65	99.34	3.13953	0.01779	3.12174					128	3967.84	99.87	7.47016	0.00066	7.4695
129	3972.5	99.99	3.76558	0.01766	3.74792					129	3964.74	99.79	7.36548	0.0214	7.34408
130	3972.5	99.99	3.13413	0.02034	3.11379					130	3952.31	99.48	7.38917	1e-05	7.38916
131	3970.41	99.93	3.22201	0.01422	3.20779					131	3972.5	99.99	7.4578	6e-05	7.45774
132	3928.55	98.88	3.88305	0.01572	3.86733					132	3967.5	99.86	7.45819	0.0001	7.45809
133	3962.67	99.74	3.88179	0.00531	3.87648					133	3972.03	99.98	7.46789	0.0001	7.46779
134	3972.03	99.98	3.2051	0.02173	3.18337					134	3970.95	99.95	7.4554	7e-05	7.45533
135	3963.19	99.75	3.07509	0.01155	3.06354					135	3963.62	99.76	7.45943	6e-05	7.45937
136	3966.56	99.84	2.35204	0.0192	2.33284					136	3967.5	99.86	7.46981	0.00021	7.4696
137	3952.96	99.5	3.41163	0.01686	3.39477					137	3967.53	99.86	7.45109	0.02019	7.4309
138	3966.35	99.83	3.53298	0.01816	3.51482					138	3971.46	99.96	7.45625	0.0003	7.45595
139	3972.35	99.98	4.22024	0.01567	4.20457					139	3955.22	99.55	7.471	0.00023	7.47077
140	3949.08	99.4	3.72012	0.01509	3.70503					140	3970.41	99.93	7.44824	0.00045	7.44779
141	3964.22	99.78	2.69676	0.01775	2.67901					141	3936.57	99.08	7.46111	0.02107	7.44004
142	3971.46	99.96	3.84061	0.01848	3.82213					142	3945.1	99.3	7.46926	7e-05	7.46919
143	3972.03	99.98	2.8179	0.01336	2.80454					143	3966.53	99.84	7.46836	0.00033	7.46803
144	3961.64	99.71	3.40784	0.01774	3.3901					144	3964.74	99.79	7.41185	0.00479	7.40706
145	3962.66	99.74	3.37023	0.01551	3.35472					145	3968.36	99.88	7.46616	0.00022	7.46594
146	3949.75	99.41	2.3201	0.0175	2.3026					146	3971.98	99.97	7.46288	0.00079	7.46209
147	3934.76	99.04	3.00654	0.01878	2.98776					147	3955.22	99.55	7.44378	0.00011	7.44367
148	3962.16	99.73	3.31758	0.01624	3.30134					148	3970.95	99.95	7.45646	0.00038	7.45608
149	3906.32	98.32	3.84777	0.02128	3.82649					149	3958.54	99.64	7.45156	0.02028	7.43128
150	3972.67	99.99	4.28629	0.01876	4.26753					150	3940.96	99.19	7.4686	0.01852	7.45008
151	3969.12	99.9	3.10267	0.0191	3.08357					151	3972.67	99.99	7.44755	4e-05	7.44751
152	3961.71	99.72	2.73123	0.02104	2.71019					152	3966.53	99.84	7.4216	0.00099	7.42061
153	3970.41	99.93	3.93754	0.0093	3.92824					153	3965.26	99.8	7.46543	0.00032	7.46511
154	3909.94	98.41	4.01316	0.02054	3.99262					154	3972.5	99.99	7.38246	0.01489	7.36757
155	3969.39	99.91	3.82414	0.01371	3.81043					155	3966.53	99.84	7.46519	0.00027	7.46492
156	3968.94	99.9	3.37479	0.01559	3.3592					156	3964.27	99.78	7.46419	0.00012	7.46407
157	3968.36	99.88	4.06655	0.01661	4.04994					157	3782.76	95.21	7.46918	0.01727	7.45191
158	3972.67	99.99	3.97552	0.00695	3.96857					158	3972.35	99.98	7.45281	0.0002	7.45261
159	3963.19	99.75	3.95444	0.00736	3.94708					159	3969.76	99.92	7.42488	8e-05	7.4248
160	3950.27	99.43	3.62601	0.0095	3.61651					160	3968.8	99.89	7.46443	0.0001	7.46433
161	3972.67	99.99	3.27795	0.01861	3.25934					161	3968.5	99.89	7.46731	0.02198	7.44533
162	3960.09	99.67	3.51571	0.01802	3.49769					162	3966.86	99.85	7.454	0.00037	7.45363
163	3960.09	99.67	3.34167	0.01738	3.32429					163	3970.09	99.93	7.46809	5e-05	7.46804
164	3973.01	100	3.50393	0.01591	3.48802					164	3949.41	99.41	7.41817	0.00536	7.41281
165	3967.64	99.86	3.2339	0.01989	3.21401					165	3968.47	99.89	7.45234	0.00057	7.45177
166	3961.62	99.71	3.55713	0.01955	3.53758					166	3963.33	99.76	7.46874	0.01796	7.45078
167	3933.72	99.01	3.32861	0.01703	3.31158					167	3971.98	99.97	7.46251	0.00013	7.46238
168	3963.71	99.77	3.91216	0.01725	3.89491					168	3967.33	99.86	7.45735	3e-05	7.45732
169	3961.36	99.71	3.62319	0.01976	3.60343					169	3971.98	99.97	7.46478	0.00051	7.46427
170	3969.91	99.92	2.60538	0.01905	2.58633					170	3972.03	99.98	7.46164	0.00017	7.46147
171	3972.35	99.98	3.44564	0.00272	3.44292					171	3946.26	99.33	7.4702	0.01501	7.45519
172	3956.99	99.6	4.01594	0.01493	4.00101					172	3968.29	99.88	7.46436	0.02027	7.44409
173	3915.03	98.54	3.90323	0.02037	3.88286					173	3903.84	98.26	7.45688	0.0002	7.45668
174	3970.73	99.94	4.2004	0.01491	4.18549					174	3931.14	98.95	7.41725	0.00228	7.41497
175	3973	100	3.61312	0.01413	3.59899					175	3969.76	99.92	7.46277	0.00025	7.46252
176	3963.12	99.75	3.19252	0.01914	3.17338					176	3961.04	99.7	7.45409	9e-05	7.454
177	3936.31	99.08	3.41959	0.01981	3.39978					177	3958.78	99.64	7.46019	0.00085	7.45934
178	3968.36	99.88	3.60964	0.01897	3.59067					178	3973.01	100	7.43337	8e-05	7.43329
179	3972.67	99.99	3.8417	0.00734	3.83436					179	3940.44	99.18	7.46086	0.0036	7.45726
180	3965.26	99.8	2.49406	0.01733	2.47673					180	3949.73	99.41	7.46316	0.00015	7.46301
181	3960.09	99.67	3.8577	0.00394	3.85376					181	3966.86	99.85	7.46173	3e-05	7.4617
182	3964.27	99.78	3.42917	0.01761	3.41156					182	3962.77	99.74	7.45145	0.01713	7.43432
183	3970.09	99.93	3.03258	0.0162	3.01638					183	3964.74	99.79	7.4567	0.02108	7.43562
184	3971.46	99.96	4.09632	0.00082	4.0955					184	3957.16	99.6	7.45399	0.00127	7.45272
185	3924.42	98.78	3.79898	0.02107	3.77791					185	3968.36	99.88	7.41097	0.00902	7.40195
186	3955.55	99.56	3.45499	0.02173	3.43326					186	3972.17	99.98	7.4544	0.02203	7.43237
187	3969.91	99.92	3.11085	0.01837	3.09248					187	3972.35	99.98	7.46637	0.0002	7.46617
188	3950.84	99.44	3.75029	0.01672	3.73357					188	3966.21	99.83	7.44888	0.00196	7.44692
189	3972.35	99.98	3.42339	0.00468	3.41871					189	3959.05	99.65	7.46574	0.01817	7.44757
190	3970.95	99.95	2.94919	0.01756	2.93163					190	3971.98	99.97	7.45366	0.00014	7.45352
191	3970.73	99.94	3.1689	0.01864	3.15026					191	3968.36	99.88	7.46617	0.00065	7.46552
192	3956.99	99.6	3.23945	0.0189	3.22055					192	3972.67	99.99	7.47127	5e-05	7.47122
193	3971.98	99.97	3.66787	0.01862	3.64925					193	3966.21	99.83	7.45238	2e-05	7.45236
194	3961.64	99.71	3.7136	0.01866	3.69494					194	3970.09	99.93	7.4657	0.00046	7.46524
195	3967.2	99.85	2.96795	0.01525	2.9527					195	3972.5	99.99	7.45759	0.00011	7.45748
196	3967.18	99.85	2.3008	0.00969	2.29111					196	3958.54	99.64	7.45228	0.0203	7.43198
197	3963.19	99.75	3.547	0.01861	3.52839					197	3951.99	99.47	7.35732	1e-05	7.35731
198	3972.67	99.99	3.97728	0.0036	3.97368					198	3947.16	99.35	7.46116	0.01965	7.44151
199	3968.88	99.9	4.06662	0.02213	4.04449					199	3962.67	99.74	7.46311	1e-05	7.4631
200	3949.41	99.41	3.64208	0.00672	3.63536					200	3959.42	99.66	7.46507	4e-05	7.46503

[truncated: 1 more sheets: 10_ACOA_Seeds(25)]
