# Supplementary material for: Enhanced Hyper-Cube Framework Aco for Combinatorial Optimization Problems
Source: Preprints.org preprint supplement (doi:10.20944/preprints202108.0573.v1), 2021-08-31
Supplement: Supplementary file 4 [file 02_EACO_@_Seeds(75)_Exp.xlsx]

## Sheet: 02_EACO_@_Seeds(75)_Fast
Slow Convergence										Slow Convergenece
ige	Fbest(ige)	Fworst(ige)	Fmean(ige)	BWLocalDis	GlobalDis	Segma	MaxTau	MinTau		Expeirement no.(Iexp) =	53
1	3369.82	1882.64	2724.18	11	5	1	0.0698	0.0698		Seeds=	75
2	3757.95	1988.62	3297.39	6	4	1	0.1243	0.1243		Number of variables =	16
3	3771.59	3344.07	3615.92	3	4	1	0.1802	0.1802		no. of Ants =	25
4	3771.59	3136.82	3573.46	5	4	1	0.2294	0.2294		Maximum CBLF(fopt) =	3973.01
5	3802.2	3181.21	3658.04	2	4	1	0.2731	0.2731		Optimal Solution(xopt) =	333332322222223
6	3841.7	3179.26	3633.05	3	2	1	0.3129	0.3129		Number of Practical Optima =	1
7	3841.7	3328.99	3706.46	2	2	1	0.3491	0.3491		no. of Iterations(ige) =	29
8	3953.89	3411.73	3737.99	4	1	1	0.3824	0.3142		1st Global optima Found @ ige =	19
9	3957.5	3353.18	3754.08	5	2	1	0.4117	0.2828		Minimum Best Solution =	3369.82
10	3957.5	3359.59	3752.05	4	2	1	0.4382	0.2545		Mean of Best Solution =	3910.89
11	3957.5	3547.45	3822.55	3	2	2	0.531	0.229		SD of Best Solution =	126.104
12	3957.5	3671.97	3872	3	2	2	0.6153	0.2061		Fitness Distance Correlation =	-145.991
13	3957.5	3436.11	3839.64	3	2	2	0.6883	0.1855		Correlation Coefficent =	-0.75843
14	3957.5	3487.89	3887.32	3	2	5	0.9553	0.167		Elapsed Time =	2.4664
15	3957.5	3595.02	3902.61	1	2	10	1.5379	0.1503
16	3957.5	3595.02	3934.18	1	2	17	2.5315	0.1352
17	3971.06	3845.32	3943.12	2	1	1	2.3477	0.1217
18	3971.06	3845.32	3930.23	2	1	17	3.2938	0.1095
19	3973.01	3845.32	3960.48	3	0	1	3.0336	0.0986
20	3973.01	3885.86	3959.71	2	0	10	3.425	0.0887
21	3973.01	3845.32	3956.57	3	0	3	3.2901	0.0799
22	3973.01	3860.83	3954.29	1	0	5	3.3078	0.0719
23	3973.01	3841.7	3957.14	2	0	6	3.392	0.0647
24	3973.01	3952.41	3966.09	2	0	7	3.5422	0.0582
25	3973.01	3885.64	3964.72	1	0	8	3.7434	0.0524
26	3973.01	3952.41	3967.82	2	0	11	4.1379	0.0472
27	3973.01	3953.89	3968.93	1	0	13	4.6328	0.0424
28	3973.01	3861.66	3959.53	2	0	11	4.9318	0.0382
29	3973.01	3953.89	3969.78	1	0	17	5.6267	0.0344

## Sheet: 02_EACO_@_Seeds(75)_Slow
Slow Convergence										Slow Convergenece
ige	Fbest(ige)	Fworst(ige)	Fmean(ige)	BWLocalDis	GlobalDis	Segma	MaxTau	MinTau		Expeirement no.(Iexp) =	88
1	3427.19	1876.44	2615.31	10	5	1	0.0724	0.0724		Seeds=	75
2	3566.17	2839.07	3277.76	4	5	1	0.1326	0.1326		Number of variables =	16
3	3885.09	3356.74	3504.87	4	3	1	0.1896	0.1193		no. of Ants =	25
4	3906.42	3194.19	3677.71	5	3	1	0.2377	0.1074		Maximum CBLF(fopt) =	3972.67
5	3935.83	3114.48	3697.03	5	2	1	0.2802	0.0967		Optimal Solution(xopt) =	323333323232323
6	3967.33	3334	3728.61	7	4	1	0.32	0.1141		Number of Practical Optima =	1
7	3967.33	3460.03	3777.85	5	4	1	0.3561	0.1709		no. of Iterations(ige) =	66
8	3971.85	3489.56	3812.94	7	1	1	0.3885	0.2218		1st Global optima Found @ ige =	10
9	3971.85	3566.17	3826.01	4	1	1	0.4182	0.2681		Minimum Best Solution =	3427.19
10	3972.67	3535.64	3867.93	3	0	2	0.5119	0.2413		Mean of Best Solution =	3955.17
11	3972.67	3617.74	3873.72	3	0	2	0.5974	0.2172		SD of Best Solution =	83.763
12	3972.67	3535.64	3874.39	3	0	2	0.6731	0.1954		Fitness Distance Correlation =	-73.4772
13	3972.67	3307.3	3872.45	4	0	5	0.9358	0.1759		Correlation Coefficent =	-0.72898
14	3972.67	3725.89	3933.47	2	0	12	1.6647	0.1583		Elapsed Time =	2.4664
15	3972.67	3582.17	3933.99	3	0	17	2.6448	0.1425
16	3972.67	3647.82	3936.32	1	0	15	3.399	0.1282
17	3972.67	3861.86	3958.29	1	0	19	4.376	0.1154
18	3972.67	3832.86	3957.48	1	0	21	5.3894	0.1039
19	3972.67	3865.7	3961.54	1	0	22	6.3752	0.0935
20	3972.67	3972.67	3972.67	0	0	25	7.4877	0.0841
21	3972.67	3844.38	3966.36	1	0	23	8.3281	0.0757
22	3972.67	3865.7	3968.06	1	0	23	9.0878	0.0681
23	3972.67	3861.86	3968.24	1	0	24	9.84	0.0613
24	3972.67	3972.67	3972.67	0	0	25	10.606	0.0552
25	3972.67	3972.67	3972.67	0	0	25	11.2954	0.0497
26	3972.67	3943.26	3971.5	1	0	24	11.8408	0.0447
27	3972.67	3908.39	3970.1	1	0	24	12.3257	0.0402
28	3972.67	3861.86	3968.24	1	0	24	12.7541	0.0362
29	3972.67	3861.86	3968.24	1	0	24	13.1397	0.0326
30	3972.67	3972.67	3972.67	0	0	25	13.5757	0.0293
31	3972.67	3972.67	3972.67	0	0	25	13.9681	0.0264
32	3972.67	3908.39	3970.1	1	0	24	14.2403	0.0238
33	3972.67	3972.67	3972.67	0	0	25	14.5663	0.0214
34	3972.67	3972.67	3972.67	0	0	25	14.8596	0.0192
35	3972.67	3972.67	3972.67	0	0	25	15.1237	0.0173
36	3972.67	3972.67	3972.67	0	0	25	15.3613	0.0156
37	3972.67	3972.67	3972.67	0	0	25	15.5752	0.014
38	3972.67	3972.67	3972.67	0	0	25	15.7677	0.0126
39	3972.67	3972.67	3972.67	0	0	25	15.9409	0.0114
40	3972.67	3972.67	3972.67	0	0	25	16.0968	0.0102
41	3972.67	3972.67	3972.67	0	0	25	16.2371	0.0092
42	3972.67	3972.67	3972.67	0	0	25	16.3634	0.0083
43	3972.67	3972.67	3972.67	0	0	25	16.4771	0.0075
44	3972.67	3972.67	3972.67	0	0	25	16.5794	0.0067
45	3972.67	3972.67	3972.67	0	0	25	16.6714	0.006
46	3972.67	3972.67	3972.67	0	0	25	16.7543	0.0054
47	3972.67	3972.67	3972.67	0	0	25	16.8289	0.0049
48	3972.67	3972.67	3972.67	0	0	25	16.896	0.0044
49	3972.67	3972.67	3972.67	0	0	25	16.9564	0.004
50	3972.67	3972.67	3972.67	0	0	25	17.0107	0.0036
51	3972.67	3972.67	3972.67	0	0	25	17.0597	0.0032
52	3972.67	3972.67	3972.67	0	0	25	17.1037	0.0029
53	3972.67	3972.67	3972.67	0	0	25	17.1433	0.0026
54	3972.67	3972.67	3972.67	0	0	25	17.179	0.0023
55	3972.67	3972.67	3972.67	0	0	25	17.2111	0.0021
56	3972.67	3972.67	3972.67	0	0	25	17.24	0.0019
57	3972.67	3972.67	3972.67	0	0	25	17.266	0.0017
58	3972.67	3972.67	3972.67	0	0	25	17.2894	0.0015
59	3972.67	3972.67	3972.67	0	0	25	17.3104	0.0014
60	3972.67	3972.67	3972.67	0	0	25	17.3294	0.0012
61	3972.67	3972.67	3972.67	0	0	25	17.3465	0.0011
62	3972.67	3972.67	3972.67	0	0	25	17.3618	0.001
63	3972.67	3972.67	3972.67	0	0	25	17.3756	0.0009
64	3972.67	3972.67	3972.67	0	0	25	17.3881	0.0008
65	3972.67	3972.67	3972.67	0	0	25	17.3993	0.0007
66	3972.67	3972.67	3972.67	0	0	25	17.4093	0.0007
