# Supplementary material for: Enhanced Hyper-Cube Framework Aco for Combinatorial Optimization Problems
Source: Preprints.org preprint supplement (doi:10.20944/preprints202108.0573.v1), 2021-08-31
Supplement: Supplementary file 5 [file 02_EACO_Seeds_Results.xlsx]

## Sheet: 00_Index
		Global optimal solution		Relaibility (%)		Normalized Price (iteration)		Correlation Coefficent		Performance rate		Elapsed time (Sec)		Solution Quality
		Fast convergence	Slow Convergence	Fast convergence	Slow Convergence	Fast convergence	Slow Convergence	Fast convergence	Slow Convergence	Fast convergence	Slow Convergence	Fast convergence	Slow Convergence	Fast convergence	Slow Convergence
	Seed (301)	3973.01	3972.67	6.5	9.5	253.385	680.263	-1	-0.86796	0.0039466	0.0016248	0.76756	2.9876	98.5963	98.7041
	Seed (2)	3973	3973.01	7.5	10.5	223.8	611.048	-0.82029	-0.87896	0.0044683	0.0016365	0.77331	2.934	98.6384	98.765
	Seed (50)	3973	3973	12	10	136.792	558.609	-0.82429	-0.87187	0.0073104	0.0017902	0.75747	2.944	98.6222	98.5986
	Seed (75)	3973.01	3972.67	8	10	211.438	211.438	-1	-1	0.0047295	0.001558	0.78492	2.9477	98.6982	98.6644
	Seed (111)	3973.01	3973	10	8.5	169.1	747.235	-0.82144	-0.87769	0.0059137	0.0013383	0.77819	2.931	98.6559	98.7581
	Seed (200)	3973.01	3973	8	8.5	210.875	747	-0.81722	-0.89293	0.0047421	0.0013387	0.78101	2.9916	98.7056	98.6982
	Seed (167)	3973	3973	17.045	12	213.062	537.875	-1	-1	0.0071259	0.0018592	0.78653	2.963	98.431	98.7727
	Seed (225)	3972.67	3973	11	8	153.091	794.312	-1	-1	0.0060887	0.001259	0.78154	2.9174	98.4954	98.5362
	Seed (11)	3973	3973.01	10.5	11	164.238	584.182	-1	-1	0.0060887	0.0017118	0.80385	2.9667	98.6775	98.8401
	Seed (25)	3973.01	3973	11.5	10.5	146.217	603.619	-0.83843	-0.87093	0.0068391	0.0016567	0.77963	3.0154	98.5088	98.5834
			Fast Convergence						Slow Convergence
			Relaibility (%)	Normalized Price (iteration)	Correlation Coefficent	Performance Rate	Elapsed time (sec)		Relaibility (%)	Normalized Price (iteration)	Correlation Coefficent	Performance Rate	Elapsed time (sec)
		Min.	6.5	136.792	-1	0.0039466	0.75747	Min.	8	211.438	-1	0.001259	2.9174
		Max.	17.045	253.385	-0.81722	0.0073104	0.80385	Max.	12	794.312	-0.86796	0.0018592	3.0154
		Mean	10.2045	188.2	-0.912167	0.0057253	0.779401	Mean	9.85	607.558	-0.876723	0.00157732	2.95984
		Median	10.25	189.988	-0.82144	0.0060012	0.78032	Median	10	607.333	-0.87478	0.00163065	2.95535
		Standrad division	2.88468	37.1021	0.00740321	0.00112768	0.0116017	Standrad division	1.18427	156.158	0.00819051	0.000192533	0.0293635
			Solution Quality
			Fast Conv.	Slow Conv.
		Min.	98.431	98.5362
		Max.	98.7056	98.8401
		Mean	98.6029	98.6921
		Median	98.6303	98.7011
		Standrad division	0.0892415	0.0915871

## Sheet: 01_EACO_Seeds(301)
Fast Converegnce Exp							Fast Converegnce Exp			Slow Converegnce Exp							Slow Converegnce Exp
#	CBLF	Quality	Taumax	Taumin	DeltaTauminmax		Global Optimal Solution =	3973.01		#	CBLF	Quality	Taumax	Taumin	DeltaTauminmax		Global Optimal Solution =	3972.67
1	3949.73	99.41	9.46037	0.06841	9.39196		Minimum Optimal Solution =	3540.81		1	3949.73	99.41	17.4074	0.00376	17.4036		Minimum Optimal Solution =	3693.09
2	3913.44	98.5	10.9128	0.07422	10.8386		Mean of Optimal Solution =	3917.24		2	3757.82	94.58	17.4114	0.07006	17.3414		Mean of Optimal Solution =	3921.52
3	3928.19	98.87	10.1124	0.06915	10.0433		Median of Optimal Solution =	3917.24		3	3952.33	99.48	17.4376	0.07158	17.366		Median of Optimal Solution =	3921.52
4	3924.93	98.79	10.327	0.07498	10.252		Solution Standrad Deviation =	59.0913		4	3858.35	97.11	17.4398	0.06798	17.3719		Solution Standrad Deviation =	49.4727
5	3865.97	97.31	10.372	0.07554	10.2964		Average Price =	16.47		5	3889.57	97.9	17.4129	0.07167	17.3413		Average Price =	64.625
6	3912.01	98.46	10.2336	0.02348	10.2102		Relability =	6.5		6	3967.84	99.87	17.3244	0.06876	17.2557		Relability =	9.5
7	3953.93	99.52	8.45389	0.07269	8.3812		Normalized Price =	253.385		7	3964.74	99.79	17.4184	0.0004	17.418		Normalized Price =	680.263
8	3927.32	98.85	8.77154	0.06698	8.70456		Average Solution Quality =	98.5963		8	3950.08	99.42	17.4317	0.06851	17.3631		Average Solution Quality =	98.7041
9	3886.33	97.82	4.70314	0.06922	4.63392		Average FDC =	-88.8164		9	3887.16	97.84	17.4286	0.07102	17.3576		Average FDC =	-28.1018
10	3937.77	99.11	9.85505	0.0378	9.81725		Correlation Coefficent =	-1		10	3897.05	98.09	17.432	0.00031	17.4317		Correlation Coefficent =	-0.86796
11	3973.01	100	10.0745	0.02045	10.0541		Solution Robustness =	66.2913		11	3966.86	99.85	17.3241	0.01316	17.311		Solution Robustness =	79.2663
12	3941.6	99.21	9.00431	0.06838	8.93593		Performance Rate =	0.0039466		12	3855.14	97.03	17.426	0.06839	17.3576		Performance Rate =	0.0016248
13	3933.2	99	8.78288	0.06999	8.71289		Average Elapsed Time =	0.76756		13	3972.35	99.98	17.4138	0.00023	17.4136		Average Elapsed Time =	2.9876
14	3955.44	99.56	8.78476	0.07178	8.71298					14	3972.67	99.99	17.414	0.00091	17.4131
15	3843.25	96.73	9.19134	0.07114	9.1202					15	3968.61	99.89	17.308	0.06925	17.2388
16	3791.55	95.43	9.5171	0.07106	9.44604					16	3972.67	99.99	17.4028	0.00021	17.4026
17	3924.52	98.78	8.08678	0.04675	8.04003					17	3870.99	97.43	17.4368	0.06826	17.3685
18	3869.57	97.4	6.06753	0.0697	5.99783					18	3870.65	97.42	17.2571	0.06619	17.1909
19	3919.04	98.64	10.3595	0.0701	10.2894					19	3868.1	97.36	17.2624	0.07122	17.1912
20	3841.16	96.68	9.77926	0.07041	9.70885					20	3871.17	97.44	17.4316	0.07201	17.3596
21	3947.16	99.35	9.239	0.07025	9.16875					21	3869.7	97.4	17.4327	0.07186	17.3608
22	3883.89	97.76	7.9691	0.07357	7.89553					22	3924.2	98.77	17.4211	0.00064	17.4205
23	3934.63	99.03	9.0563	0.07056	8.98574					23	3959.05	99.65	17.384	7e-05	17.384
24	3965.26	99.8	8.20132	0.0734	8.12792					24	3915.68	98.56	17.4414	0.07376	17.3676
25	3860.65	97.17	9.83334	0.06957	9.76377					25	3971.98	99.97	17.413	0.00011	17.4129
26	3953.37	99.51	8.11587	0.07042	8.04545					26	3860.01	97.16	17.4182	0.07064	17.3476
27	3967.84	99.87	7.37818	0.0723	7.30588					27	3965.26	99.8	17.3998	0.00013	17.3996
28	3972.35	99.98	10.0154	0.02069	9.99467					28	3941.33	99.2	17.3913	0.00084	17.3905
29	3906.84	98.33	8.42405	0.07023	8.35382					29	3887.71	97.85	17.4264	0.06902	17.3574
30	3960.07	99.67	7.47231	0.01299	7.45932					30	3931.14	98.95	17.4329	0.07001	17.3629
31	3964.92	99.8	7.22695	0.01612	7.21083					31	3826.05	96.3	17.3679	0.06913	17.2987
32	3875.82	97.55	8.5372	0.07069	8.46651					32	3967.18	99.85	17.2648	7e-05	17.2648
33	3949.75	99.41	10.2335	0.07137	10.1621					33	3926.9	98.84	17.4402	0.07125	17.3689
34	3955.02	99.55	10.4304	0.07251	10.3579					34	3942.09	99.22	17.2832	0.07282	17.2104
35	3947.79	99.37	6.10317	0.06945	6.03372					35	3950.27	99.43	17.3997	0.07426	17.3255
36	3970.41	99.93	10.3854	0.00113	10.3842					36	3866.51	97.32	17.4284	0.07209	17.3563
37	3972.35	99.98	9.27936	0.07251	9.20685					37	3964.59	99.79	17.4353	0.00016	17.4351
38	3963.09	99.75	10.6113	0.07424	10.5371					38	3941	99.19	17.3755	0.00111	17.3744
39	3972.17	99.98	9.99274	0.07602	9.91672					39	3921.73	98.71	17.3975	0.06938	17.3282
40	3891.57	97.95	4.77402	0.06862	4.7054					40	3902.98	98.24	17.4109	0.07036	17.3406
41	3939.41	99.15	10.3139	0.07432	10.2396					41	3944.97	99.29	17.2437	0.07131	17.1724
42	3952.41	99.48	9.90773	0.07044	9.83729					42	3909.42	98.4	17.3898	0.00468	17.3852
43	3930.1	98.92	8.62064	0.06937	8.55127					43	3970.73	99.94	17.4184	0.00046	17.4179
44	3966.86	99.85	9.65251	0.03074	9.62177					44	3921.94	98.71	17.3665	0	17.3665
45	3855.14	97.03	9.20356	0.06839	9.13517					45	3962.33	99.73	17.3999	0.00137	17.3985
46	3824.12	96.25	9.55646	0.07378	9.48268					46	3955.22	99.55	17.3957	0.0014	17.3943
47	3916.66	98.58	9.01742	0.07473	8.94269					47	3871.2	97.44	17.3948	0.00026	17.3946
48	3953.7	99.51	8.75103	0.07176	8.67927					48	3946.94	99.34	17.3201	0.07203	17.248
49	3972.35	99.98	9.03954	0.0287	9.01084					49	3916.92	98.59	17.4266	0.06749	17.3591
50	3799.13	95.62	7.57301	0.06782	7.50519					50	3880.99	97.68	17.4069	0.07121	17.3357
51	3925.44	98.8	10.3273	0.07198	10.2553					51	3964.22	99.78	17.4383	0.00028	17.438
52	3931.14	98.95	10.2018	0.07441	10.1273					52	3860.31	97.16	17.4382	0.07386	17.3643
53	3906.32	98.32	7.26266	0.06965	7.19301					53	3959.05	99.65	17.4321	0.06803	17.364
54	3973	100	7.36435	0.00074	7.36361					54	3960.86	99.69	17.4283	0.07312	17.3552
55	3973.01	100	8.33801	0.07293	8.26508					55	3952.75	99.49	17.3554	0.06915	17.2863
56	3884.61	97.77	8.41577	0.06953	8.34624					56	3952.78	99.49	17.1374	0.06978	17.0676
57	3922.62	98.73	9.31776	0.07387	9.24389					57	3939.83	99.16	17.1834	0.07322	17.1102
58	3897.72	98.11	9.63262	0.06973	9.56289					58	3693.09	92.95	17.4046	0.07176	17.3329
59	3961.12	99.7	10.5719	0.07214	10.4998					59	3940.61	99.18	17.3671	0.07281	17.2943
60	3964.44	99.78	8.55754	0.06873	8.48881					60	3895.88	98.06	17.1827	0.07126	17.1114
61	3943.38	99.25	9.58817	0.0708	9.51737					61	3953.37	99.51	17.4091	0.07345	17.3356
62	3905.29	98.3	8.17953	0.07146	8.10807					62	3953.89	99.52	17.4277	0.00023	17.4274
63	3858.76	97.12	8.31736	0.06842	8.24894					63	3972.35	99.98	17.4003	0.00209	17.3983
64	3960.42	99.68	7.45113	0.07353	7.3776					64	3949.23	99.4	17.4096	0.07105	17.3386
65	3882.02	97.71	10.4931	0.07082	10.4223					65	3897.02	98.09	17.2806	0.07264	17.2079
66	3970.41	99.93	9.10264	0.05863	9.04401					66	3844.28	96.76	17.2541	0.0746	17.1795
67	3937.47	99.11	8.87487	0.06844	8.80643					67	3927.52	98.85	17.4333	0.0716	17.3617
68	3858.51	97.12	9.89166	0.07121	9.82045					68	3967.32	99.86	17.2673	0.06911	17.1982
69	3803.44	95.73	9.28265	0.06923	9.21342					69	3920.44	98.68	17.3518	0.07196	17.2798
70	3971.46	99.96	8.60786	0.07323	8.53463					70	3916.59	98.58	17.4282	0.07281	17.3553
71	3963.33	99.76	5.53836	0.07155	5.46681					71	3893.91	98.01	17.2345	0.07549	17.1591
72	3941	99.19	9.39949	0.07154	9.32795					72	3945.35	99.3	17.4026	0.07029	17.3323
73	3947.16	99.35	10.4143	0.06499	10.3493					73	3972.67	99.99	17.4179	0.00092	17.417
74	3896.5	98.07	7.50814	0.06936	7.43878					74	3962.67	99.74	17.4299	0.00053	17.4294
75	3967.18	99.85	7.75897	0.06935	7.68962					75	3964.92	99.8	17.3811	0.00385	17.3773
76	3685.06	92.75	10.6703	0.0217	10.6486					76	3968.88	99.9	17.373	0.0704	17.3026
77	3833.8	96.5	9.37824	0.06907	9.30917					77	3972.5	99.99	17.3711	0.07076	17.3004
78	3935.63	99.06	9.36461	0.06924	9.29537					78	3871.17	97.44	17.4007	0.07267	17.328
79	3935.45	99.05	10.1228	0.07408	10.0487					79	3967.18	99.85	17.436	0.00015	17.4358
80	3902.34	98.22	9.36745	0.06932	9.29813					80	3959.05	99.65	17.43	0.00046	17.4296
81	3936.82	99.09	10.2514	0.07161	10.1798					81	3902.19	98.22	17.4368	0.07128	17.3655
82	3958.27	99.63	10.2956	0.07282	10.2227					82	3949.75	99.41	17.4378	0.0724	17.3654
83	3883.02	97.73	9.96931	0.07127	9.89804					83	3955.44	99.56	17.3578	0.07133	17.2865
84	3879.72	97.65	10.0097	0.0695	9.94017					84	3861	97.18	17.4334	0.06848	17.365
85	3892.61	97.98	9.42143	0.07152	9.34991					85	3963.19	99.75	17.3688	0.0021	17.3667
86	3850.52	96.92	10.3422	0.07146	10.2707					86	3909.42	98.4	17.4043	0.06938	17.335
87	3863.12	97.23	10.2361	0.04087	10.1952					87	3809.64	95.89	17.3157	0.00364	17.312
88	3941.44	99.21	8.8563	0.07188	8.78442					88	3877.79	97.6	17.2262	0.07172	17.1545
89	3827.61	96.34	8.7051	0.06893	8.63617					89	3970.09	99.93	17.443	1e-05	17.443
90	3731.15	93.91	10.3614	0.06877	10.2926					90	3878.58	97.62	17.4228	0.07014	17.3527
91	3919.12	98.64	10.1283	0.0721	10.0562					91	3883.82	97.76	17.3295	0.07334	17.2561
92	3949.23	99.4	8.20647	0.05074	8.15573					92	3924.93	98.79	17.4188	0.07289	17.3459
93	3882.01	97.71	8.75211	0.07016	8.68195					93	3926.14	98.82	17.4014	0.00164	17.3998
94	3968.36	99.88	10.1033	0.07006	10.0332					94	3971.7	99.97	17.4075	0.00354	17.404
95	3968.88	99.9	9.73986	0.07379	9.66607					95	3968.36	99.88	17.3806	0.0718	17.3088
96	3931.95	98.97	8.40565	0.06803	8.33762					96	3934.24	99.02	17.4055	0.07146	17.334
97	3874.27	97.51	9.77752	0.03322	9.7443					97	3924.2	98.77	17.4249	0.00066	17.4242
98	3964.92	99.8	9.10124	0.03442	9.06682					98	3952.64	99.49	17.4265	0.00126	17.4253
99	3967.18	99.85	9.52814	0.05909	9.46905					99	3963.19	99.75	17.4004	0.00013	17.4003
100	3934.19	99.02	10.4562	0.07402	10.3822					100	3897.18	98.09	17.3486	0.07297	17.2757
101	3968.82	99.89	9.09359	0.07161	9.02198					101	3962.66	99.74	17.4243	0.00052	17.4238
102	3927.57	98.86	7.31333	0.0737	7.23963					102	3923.88	98.76	17.4446	0.00017	17.4444
103	3920.66	98.68	9.88128	0.06737	9.81391					103	3953.37	99.51	17.4403	0.07008	17.3702
104	3930.34	98.93	10.0369	0.05845	9.97845					104	3925.51	98.8	17.4375	0.0719	17.3656
105	3958.13	99.63	7.85621	0.07107	7.78514					105	3963.33	99.76	17.3193	0.07009	17.2492
106	3929.59	98.91	8.60146	0.0722	8.52926					106	3939.93	99.17	17.4308	0.06954	17.3613
107	3954.92	99.54	6.30849	0.06637	6.24212					107	3923.18	98.75	17.4125	0.07048	17.342
108	3832.15	96.45	8.76975	0.07126	8.69849					108	3725.24	93.76	17.4461	0.07302	17.3731
109	3933.57	99.01	9.13135	0.01687	9.11448					109	3867.32	97.34	17.4365	0.00065	17.4359
110	3949.75	99.41	9.55364	0.07407	9.47957					110	3951.82	99.47	17.4115	0.06919	17.3423
111	3963.62	99.76	10.1366	0.06186	10.0747					111	3925.18	98.8	17.1564	0.07346	17.083
112	3965.24	99.8	8.70618	0.00074	8.70544					112	3969.14	99.9	17.4187	0.07342	17.3453
113	3859.33	97.14	9.8557	0.07033	9.78537					113	3831.41	96.44	17.4156	0.06737	17.3483
114	3967.84	99.87	10.5606	0.00102	10.5596					114	3899.6	98.15	17.4232	0.06966	17.3536
115	3856.98	97.08	10.0276	0.01375	10.0138					115	3961.64	99.71	17.434	0.00046	17.4335
116	3926.23	98.82	7.70676	0.07115	7.63561					116	3873.75	97.5	17.44	0.07191	17.3681
117	3959.05	99.65	9.55351	0.07395	9.47956					117	3845.32	96.79	17.3223	0.07231	17.25
118	3915.63	98.56	8.89552	0.07125	8.82427					118	3880.47	97.67	17.4421	0.07044	17.3716
119	3933.72	99.01	8.56146	0.06945	8.49201					119	3884.61	97.77	17.4308	0.06769	17.3631
120	3935.6	99.06	7.91451	0.07282	7.84169					120	3959.45	99.66	17.4187	0.07111	17.3476
121	3933.55	99.01	4.92515	0.07041	4.85474					121	3903.53	98.25	17.4254	0.07115	17.3543
122	3902.19	98.22	9.24673	0.0715	9.17523					122	3956.63	99.59	17.4169	0.07767	17.3392
123	3964.74	99.79	10.1417	0.07112	10.0706					123	3838.56	96.62	17.4274	0.0044	17.423
124	3951.82	99.47	9.80349	0.07163	9.73186					124	3962.47	99.73	17.4148	0.07135	17.3434
125	3968.36	99.88	10.2448	0.04044	10.2044					125	3840.46	96.66	17.4263	0.07129	17.355
126	3867.85	97.35	8.65449	0.07185	8.58264					126	3894.47	98.02	17.4433	0.00017	17.4431
127	3952.16	99.48	8.18306	0.07412	8.10894					127	3972.35	99.98	17.425	0.00078	17.4242
128	3540.81	89.12	10.9224	0.06962	10.8528					128	3847.38	96.84	17.2264	0.07168	17.1547
129	3959.05	99.65	7.56128	0.07258	7.4887					129	3947.14	99.35	17.3544	0.00508	17.3494
130	3715.59	93.52	8.8975	0.06796	8.82954					130	3828.77	96.37	17.4449	0.07454	17.3704
131	3730.18	93.89	10.3102	0.0699	10.2403					131	3972.03	99.98	17.2703	4e-05	17.2703
132	3865.48	97.29	9.53764	0.07439	9.46325					132	3922.56	98.73	17.4367	0.07549	17.3612
133	3964.74	99.79	8.16845	0.071	8.09745					133	3966.53	99.84	17.376	0.00205	17.3739
134	3943.55	99.26	10.0736	0.07527	9.99834					134	3899.08	98.14	17.4266	0.07148	17.3551
135	3853.59	96.99	9.24711	0.06881	9.1783					135	3972.35	99.98	17.1317	0.04052	17.0911
136	3834.46	96.51	10.735	0.07546	10.6595					136	3886.15	97.81	17.308	0.07016	17.2379
137	3950.81	99.44	9.22961	0.06713	9.16248					137	3961.64	99.71	17.4336	0.07143	17.3622
138	3964.59	99.79	9.89856	0.07352	9.82504					138	3886.68	97.83	17.4235	0.07694	17.3465
139	3921.96	98.72	4.26995	0.07165	4.1983					139	3873.27	97.49	17.4413	0.07066	17.3706
140	3875.43	97.54	10.3036	0.0722	10.2314					140	3956.51	99.58	17.1761	0.03336	17.1428
141	3932.37	98.98	9.61074	0.07086	9.53988					141	3912.31	98.47	17.4378	0.07207	17.3657
142	3913.81	98.51	9.09967	0.07151	9.02816					142	3959.05	99.65	17.3736	0.07035	17.3032
143	3962.45	99.73	8.94374	0.07064	8.8731					143	3898.05	98.11	17.4308	0.07439	17.3564
144	3918.21	98.62	7.12233	0.07176	7.05057					144	3962.66	99.74	17.4263	0.00092	17.4253
145	3916.28	98.57	8.0613	0.07019	7.99111					145	3964.92	99.8	17.4018	0.00027	17.4016
146	3963.19	99.75	7.08923	0.06756	7.02167					146	3970.09	99.93	17.4286	0.00091	17.4276
147	3959.05	99.65	9.67255	0.07039	9.60216					147	3873.48	97.49	17.4411	0.07427	17.3668
148	3964.92	99.8	6.7966	0.02035	6.77625					148	3968.88	99.9	17.4351	1e-05	17.4351
149	3884.61	97.77	7.95166	0.06956	7.8821					149	3972.35	99.98	17.4091	0.00089	17.4082
150	3964.22	99.78	9.20111	0.07172	9.12939					150	3907.09	98.34	17.3017	0.07319	17.2285
151	3894.95	98.04	10.4242	0.07234	10.3519					151	3970.95	99.95	17.2461	0.03489	17.2112
152	3850.35	96.91	6.9719	0.07005	6.90185					152	3856.17	97.06	17.4221	0.07014	17.352
153	3962.67	99.74	8.77446	0.0709	8.70356					153	3943.61	99.26	17.4153	0.07214	17.3432
154	3925.31	98.8	5.20647	0.0691	5.13737					154	3946.5	99.33	17.3538	0.00363	17.3502
155	3961.07	99.7	8.20619	0.07168	8.13451					155	3823.69	96.24	17.4251	0.00014	17.425
156	3955.44	99.56	8.26236	0.07174	8.19062					156	3931.4	98.95	17.4005	0.07622	17.3242
157	3955.95	99.57	8.51159	0.07133	8.44026					157	3950.78	99.44	17.3869	0	17.3869
158	3959.05	99.65	9.4255	0.0713	9.3542					158	3902.61	98.23	17.4274	0.07271	17.3547
159	3913.55	98.5	7.98644	0.06896	7.91748					159	3972.67	99.99	17.4072	8e-05	17.4071
160	3917.7	98.61	10.5485	0.0694	10.4791					160	3953.72	99.51	17.3971	0.0735	17.3237
161	3967.18	99.85	10.4901	0.04057	10.4496					161	3937.8	99.11	17.4464	0.0687	17.3777
162	3898.57	98.13	8.78903	0.07164	8.71739					162	3877.46	97.6	17.4331	0.07019	17.3629
163	3958.54	99.64	8.79571	0.07462	8.72109					163	3934.22	99.02	17.3986	0.00038	17.3983
164	3968.8	99.89	9.19289	0.05197	9.14092					164	3964.22	99.78	17.4212	0.07241	17.3488
165	3919.07	98.64	8.48888	0.07051	8.41837					165	3954.92	99.54	17.4344	0.07069	17.3637
166	3950.79	99.44	9.47457	0.06754	9.40703					166	3948.2	99.38	17.4111	0.07329	17.3379
167	3964.92	99.8	8.71005	0.04697	8.66308					167	3923.72	98.76	17.4273	0.06588	17.3614
168	3929.76	98.91	7.07482	0.07093	7.00389					168	3953.61	99.51	17.4284	0.00026	17.4281
169	3900.28	98.17	10.7883	0.02213	10.7662					169	3833.39	96.49	17.395	0.00083	17.3942
170	3905.29	98.3	10.0595	0.06891	9.99061					170	3928.03	98.87	17.4255	0.07316	17.3523
171	3900.92	98.19	7.94507	0.07238	7.87269					171	3880.99	97.68	17.4312	0.0703	17.3609
172	3963.71	99.77	8.81099	0.06823	8.74276					172	3911.74	98.46	17.395	0.07002	17.3249
173	3914.83	98.54	8.69442	0.07192	8.6225					173	3957.5	99.61	17.4142	0.06894	17.3453
174	3958.8	99.64	9.16865	0.06779	9.10086					174	3815.85	96.04	17.1978	0.07274	17.1251
175	3968.47	99.89	6.42064	0.07396	6.34668					175	3972.35	99.98	17.4192	0.00067	17.4185
176	3855.2	97.03	5.56112	0.0717	5.48942					176	3857.21	97.09	17.3548	0.07232	17.2824
177	3960.72	99.69	8.76607	0.07391	8.69216					177	3876.81	97.58	17.4252	0.07112	17.354
178	3941.99	99.22	8.41664	0.01913	8.39751					178	3847.56	96.84	17.4442	0.0682	17.376
179	3816.52	96.06	8.0709	0.06653	8.00437					179	3966.21	99.83	17.3287	0.00142	17.3273
180	3969.14	99.9	9.8607	0.07047	9.79023					180	3962.16	99.73	17.4229	0.0708	17.3521
181	3790.51	95.41	10.4881	0.07145	10.4166					181	3937.72	99.11	17.4375	0.06742	17.37
182	3862.47	97.22	10.2655	0.02238	10.2432					182	3958.02	99.62	17.3186	0.07038	17.2482
183	3972.03	99.98	9.01574	0.02959	8.98615					183	3952.31	99.48	17.2931	0.01572	17.2774
184	3935.49	99.06	7.16784	0.07471	7.09313					184	3875.38	97.54	17.4425	0.07148	17.3711
185	3969.12	99.9	7.11523	0.00049	7.11474					185	3921.31	98.7	17.4301	0.07208	17.358
186	3923.88	98.76	8.7688	0.06988	8.69892					186	3858.92	97.13	17.4456	1e-05	17.4456
187	3924.93	98.79	10.261	0.07058	10.1904					187	3943.59	99.26	17.4037	0.00024	17.4034
188	3779.8	95.14	8.51442	0.07188	8.44254					188	3967.02	99.85	17.4329	0.07061	17.3623
189	3955.44	99.56	9.98148	0.07193	9.90955					189	3958.54	99.64	17.3294	0.07346	17.2559
190	3939.98	99.17	8.0442	0.06848	7.97572					190	3793.35	95.48	17.3527	0.06812	17.2845
191	3916.26	98.57	10.7324	0.07289	10.6595					191	3936.31	99.08	17.4064	0.0711	17.3353
192	3916.14	98.57	10.0933	0.07053	10.0228					192	3962.16	99.73	17.4209	0.0763	17.3446
193	3895.53	98.05	10.1319	0.06936	10.0626					193	3958.54	99.64	17.3814	0.0711	17.3103
194	3843.01	96.73	9.98299	0.07147	9.91152					194	3947.88	99.37	17.4185	0.06857	17.3499
195	3916.78	98.58	8.21637	0.06803	8.14834					195	3901.67	98.2	17.3088	0.06857	17.2402
196	3909.59	98.4	9.59365	0.0719	9.52175					196	3926.93	98.84	17.4456	0.07477	17.3709
197	3958.54	99.64	9.8008	0.0713	9.7295					197	3926.78	98.84	17.4034	0.0003	17.4031
198	3967.64	99.86	9.27607	0.07362	9.20245					198	3963.95	99.77	17.3381	0.00144	17.3366
199	3934.76	99.04	8.53763	0.06858	8.46905					199	3952.8	99.49	17.4267	0.07055	17.3562
200	3918.73	98.63	9.32683	0.07065	9.25618					200	3958.02	99.62	17.4191	0.06933	17.3498

## Sheet: 02_EACO_Seeds(2)
Fast Converegnce Exp							Fast Converegnce Exp			Slow Converegnce Exp							Slow Converegnce Exp
#	CBLF	Quality	Taumax	Taumin	DeltaTauminmax		Global Optimal Solution =	3973		#	CBLF	Quality	Taumax	Taumin	DeltaTauminmax		Global Optimal Solution =	3973.01
1	3944.33	99.28	8.67504	0.06936	8.60568		Minimum Optimal Solution =	3696.94		1	3944.33	99.28	17.4113	0.06936	17.342		Minimum Optimal Solution =	3620.49
2	3933.2	99	9.50374	0.07081	9.43293		Mean of Optimal Solution =	3918.91		2	3873.85	97.5	17.4315	0.07064	17.3609		Mean of Optimal Solution =	3923.94
3	3926.8	98.84	10.237	0.06625	10.1707		Median of Optimal Solution =	3918.91		3	3794.08	95.5	17.4403	0.07062	17.3697		Median of Optimal Solution =	3923.94
4	3968.88	99.9	9.74012	0.07001	9.67011		Solution Standrad Deviation =	55.8358		4	3954.02	99.52	17.403	0.0725	17.3305		Solution Standrad Deviation =	52.5912
5	3968.8	99.89	9.56094	0.01318	9.54776		Average Price =	16.785		5	3959.05	99.65	17.4241	0.0673	17.3568		Average Price =	64.16
6	3859.28	97.14	8.08823	0.07241	8.01582		Relability =	7.5		6	3968.88	99.9	17.4099	0.00014	17.4097		Relability =	10.5
7	3930.8	98.94	7.10304	0.07348	7.02956		Normalized Price =	223.8		7	3940.82	99.19	17.4443	0.07464	17.3697		Normalized Price =	611.048
8	3872.2	97.46	7.94051	0.07107	7.86944		Average Solution Quality =	98.6384		8	3895.22	98.04	17.3144	0.07138	17.243		Average Solution Quality =	98.765
9	3960.09	99.67	7.67471	0.07104	7.60367		Average FDC =	-87.2331		9	3958.54	99.64	17.3311	0.07298	17.2581		Average FDC =	-31.3142
10	3829.08	96.38	10.646	0.06778	10.5782		Correlation Coefficent =	-0.82029		10	3971.46	99.96	17.4348	0.07103	17.3638		Correlation Coefficent =	-0.87896
11	3932.05	98.97	6.91285	0.07026	6.84259		Solution Robustness =	70.1864		11	3889.05	97.89	17.424	0.07427	17.3498		Solution Robustness =	74.6122
12	3915.11	98.54	8.19322	0.07016	8.12306		Performance Rate =	0.0044683		12	3973.01	100	17.4381	0.00066	17.4375		Performance Rate =	0.0016365
13	3936.82	99.09	9.56852	0.06971	9.49881		Average Elapsed Time =	0.77331		13	3944	99.27	17.4155	0.07331	17.3422		Average Elapsed Time =	2.934
14	3763.11	94.72	9.42088	0.07011	9.35077					14	3964.92	99.8	17.4318	0.00014	17.4316
15	3869.7	97.4	10.6967	0.07458	10.6221					15	3872.44	97.47	17.4402	0.06897	17.3712
16	3825.36	96.28	8.91464	0.07035	8.84429					16	3971.38	99.96	17.439	1e-05	17.439
17	3928.03	98.87	10.2577	0.07225	10.1854					17	3879.62	97.65	17.354	0.07218	17.2818
18	3958.6	99.64	9.03194	0.07256	8.95938					18	3966.29	99.83	17.3316	0.0731	17.2585
19	3968.88	99.9	8.47018	0.07096	8.39922					19	3970.09	99.93	17.4416	0.00045	17.4411
20	3966.56	99.84	8.40256	0.07476	8.3278					20	3838.08	96.6	17.3834	0.07044	17.3129
21	3937.34	99.1	9.64714	0.06595	9.58119					21	3943.59	99.26	17.4265	0.00203	17.4245
22	3840.41	96.66	10.2001	0.06607	10.1341					22	3952.85	99.49	17.3409	0.06657	17.2743
23	3947.88	99.37	9.5627	0.06925	9.49345					23	3940.06	99.17	17.424	0.07283	17.3512
24	3940.82	99.19	10.6623	0.07464	10.5877					24	3866.67	97.32	17.0604	0.07196	16.9884
25	3828.79	96.37	8.61438	0.07014	8.54424					25	3938.19	99.12	17.4318	0.06874	17.363
26	3943.59	99.26	9.43492	0.04755	9.38737					26	3933.89	99.02	17.4069	0.00098	17.4059
27	3895.22	98.04	6.52044	0.07138	6.44906					27	3873.08	97.48	17.4062	0.07329	17.3329
28	3943.03	99.25	8.92473	0.07134	8.85339					28	3973.01	100	17.4333	0.00043	17.4328
29	3968.88	99.9	8.88843	0.07333	8.8151					29	3926.93	98.84	17.4233	0.07135	17.352
30	3960.51	99.69	8.78096	0.07153	8.70943					30	3967.84	99.87	17.4227	0.07168	17.3511
31	3969.26	99.91	7.06667	0.07247	6.9942					31	3971.52	99.96	17.4351	0.07	17.3651
32	3933.72	99.01	8.95047	0.06853	8.88194					32	3968.15	99.88	17.4294	0.00014	17.4293
33	3951.02	99.45	9.79428	0.073	9.72128					33	3936.82	99.09	17.3879	0.07131	17.3165
34	3893.49	98	5.84209	0.07316	5.76893					34	3967.84	99.87	17.3559	0.00104	17.3548
35	3841.26	96.68	9.49356	0.06831	9.42525					35	3854.37	97.01	17.4404	0.07048	17.3699
36	3949.23	99.4	10.5688	0.07342	10.4954					36	3931.77	98.96	17.4146	0.07603	17.3386
37	3876.85	97.58	10.3029	0.0706	10.2323					37	3947.38	99.35	17.3507	0.06934	17.2813
38	3949.23	99.4	7.51802	0.06882	7.4492					38	3931.7	98.96	17.3859	0.06807	17.3178
39	3812.23	95.95	10.1127	0.06746	10.0452					39	3968.36	99.88	17.4184	0.00056	17.4179
40	3948.2	99.38	8.78704	0.07375	8.71329					40	3891.26	97.94	17.3708	0.07228	17.2985
41	3962.67	99.74	9.42443	0.07275	9.35168					41	3968.36	99.88	17.25	0.0181	17.2319
42	3957.81	99.62	10.7914	0.01847	10.7729					42	3918.21	98.62	17.4489	0.07697	17.3719
43	3962.77	99.74	8.00247	0.0701	7.93237					43	3922.17	98.72	17.435	0.07062	17.3644
44	3812.53	95.96	8.82834	0.07297	8.75537					44	3930.1	98.92	17.4078	0.07113	17.3366
45	3952.55	99.48	6.65545	0.06826	6.58719					45	3776.82	95.06	17.3718	0.06678	17.305
46	3906.84	98.33	9.85592	0.06909	9.78683					46	3973.01	100	17.4129	0.00033	17.4125
47	3958.54	99.64	6.69279	0.07185	6.62094					47	3879.06	97.64	17.4276	0.06835	17.3593
48	3877.3	97.59	9.93348	0.07106	9.86242					48	3959.89	99.67	17.3938	0.07255	17.3213
49	3958.54	99.64	8.15659	0.07148	8.08511					49	3906.84	98.33	17.4364	0.07238	17.3641
50	3931.14	98.95	10.0354	0.07411	9.96133					50	3944.79	99.29	17.4367	0.06837	17.3683
51	3963.09	99.75	9.512	0.07021	9.44179					51	3899.52	98.15	17.4446	0.07112	17.3734
52	3927.82	98.86	9.13488	0.07293	9.06195					52	3936.82	99.09	17.4161	0.071	17.3451
53	3929.72	98.91	9.88866	0.06617	9.82249					53	3867.97	97.36	17.4293	0.00029	17.429
54	3966.88	99.85	3.82484	0.06827	3.75657					54	3856.69	97.07	17.4284	0.07008	17.3584
55	3899.08	98.14	10.3461	0.07245	10.2737					55	3932.23	98.97	17.4479	0.0731	17.3748
56	3951.81	99.47	7.9103	0.0667	7.8436					56	3932.23	98.97	17.1852	0.0681	17.1171
57	3911.78	98.46	4.50309	0.06902	4.43407					57	3957.48	99.61	17.4347	0.00016	17.4345
58	3972.67	99.99	7.76515	0.0704	7.69475					58	3792.78	95.46	17.4273	0.07082	17.3565
59	3879.62	97.65	8.82143	0.07218	8.74925					59	3741.92	94.18	17.3631	0.07125	17.2919
60	3852.04	96.96	8.58607	0.07108	8.51499					60	3966.05	99.82	17.4387	0.06884	17.3698
61	3941.14	99.2	6.73141	0.06654	6.66487					61	3924.42	98.78	17.4173	0.00056	17.4168
62	3910.97	98.44	7.76256	0.07118	7.69138					62	3941.35	99.2	17.4161	0.07098	17.3451
63	3966.86	99.85	7.94105	0.07019	7.87086					63	3964.74	99.79	17.4253	0.07346	17.3518
64	3916.53	98.58	9.66863	0.07262	9.59601					64	3957.01	99.6	17.4288	0.07154	17.3572
65	3971.06	99.95	9.70911	0.03408	9.67503					65	3955.25	99.55	17.4363	0.07208	17.3643
66	3865.82	97.3	6.16757	0.06913	6.09844					66	3930.62	98.93	17.442	0.07078	17.3712
67	3943.55	99.26	9.73905	0.07289	9.66616					67	3840.15	96.66	17.3899	0.07132	17.3186
68	3968.88	99.9	7.58113	0.01112	7.57001					68	3966.53	99.84	17.4322	0.00113	17.4311
69	3915.63	98.56	9.81847	0.07381	9.74466					69	3917.7	98.61	17.4224	0.06956	17.3529
70	3949.75	99.41	7.1362	0.06914	7.06706					70	3967.84	99.87	17.1625	4e-05	17.1624
71	3946.66	99.34	9.77481	0.07379	9.70102					71	3940.96	99.19	17.3638	0.07442	17.2894
72	3964.59	99.79	8.77699	0.06865	8.70834					72	3936.18	99.07	17.3977	0.07301	17.3247
73	3950.79	99.44	8.57797	0.07408	8.50389					73	3963.62	99.76	17.4223	0.00048	17.4218
74	3850.49	96.92	8.48358	0.07503	8.40855					74	3902.7	98.23	17.3325	0.06986	17.2626
75	3949.23	99.4	4.99327	0.06607	4.9272					75	3864.96	97.28	17.426	0.07011	17.3559
76	3961.07	99.7	7.41226	0.07051	7.34175					76	3912.01	98.46	17.4146	0.07056	17.344
77	3972.35	99.98	8.0127	0.0648	7.9479					77	3788.15	95.35	17.4225	0.00055	17.422
78	3968.36	99.88	10.0635	0.03988	10.0236					78	3955.95	99.57	17.4146	0.00043	17.4142
79	3944.7	99.29	9.12823	0.07522	9.05301					79	3962.67	99.74	17.3969	0.07006	17.3268
80	3972.67	99.99	9.51315	0.03985	9.4733					80	3906.75	98.33	17.223	0.01062	17.2124
81	3940.44	99.18	7.61714	0.06715	7.54999					81	3964.92	99.8	17.4396	0.00033	17.4392
82	3953.37	99.51	7.76706	0.07143	7.69563					82	3932.81	98.99	17.4442	0.07196	17.3722
83	3943.55	99.26	7.16479	0.0741	7.09069					83	3871.17	97.44	17.4178	0.06994	17.3479
84	3931.63	98.96	8.2261	0.07198	8.15412					84	3966.21	99.83	17.3937	0.00032	17.3934
85	3959.57	99.66	8.89298	0.0036	8.88938					85	3908.52	98.38	17.149	0.0718	17.0772
86	3867.56	97.35	10.2856	0.07367	10.212					86	3958.02	99.62	17.2798	7e-05	17.2797
87	3968.88	99.9	8.80499	0.054	8.75099					87	3943.91	99.27	17.3498	0.00389	17.3459
88	3955.95	99.57	9.08411	0.06961	9.0145					88	3930.1	98.92	17.3748	0.07211	17.3027
89	3970.41	99.93	10.8955	0.02218	10.8733					89	3972.67	99.99	17.4388	0.00032	17.4385
90	3968.15	99.88	9.71547	0.05805	9.65742					90	3970.73	99.94	17.2659	6e-05	17.2658
91	3933.72	99.01	8.66516	0.06965	8.59551					91	3941.86	99.22	17.425	0.07379	17.3512
92	3872.55	97.47	9.58932	0.0714	9.51792					92	3969.91	99.92	17.4188	0.07375	17.3451
93	3899.6	98.15	9.2204	0.07146	9.14894					93	3933.89	99.02	17.4242	0.00026	17.424
94	3828.77	96.37	10.4057	0.06972	10.336					94	3937.71	99.11	17.4342	0.0701	17.3641
95	3920.8	98.69	9.41667	0.06865	9.34802					95	3817.65	96.09	17.4429	0.07148	17.3715
96	3956.33	99.58	8.51098	0.07695	8.43403					96	3968.88	99.9	17.428	0.00063	17.4273
97	3965.26	99.8	9.14366	0.07383	9.06983					97	3966.24	99.83	17.431	0.06638	17.3646
98	3887.71	97.85	5.20977	0.0721	5.13767					98	3882.95	97.73	17.4169	0.07187	17.345
99	3962.16	99.73	5.8026	0.07355	5.72905					99	3949.32	99.4	17.4177	0.07401	17.3437
100	3957.95	99.62	9.415	0.07101	9.34399					100	3962.66	99.74	17.3426	0.0036	17.339
101	3822.24	96.21	9.9924	0.06938	9.92302					101	3870.06	97.41	17.4262	0.07036	17.3559
102	3973	100	9.24532	0.07095	9.17437					102	3964.74	99.79	17.4144	0.00113	17.4133
103	3951.11	99.45	7.88821	0.0718	7.81641					103	3947.14	99.35	17.3981	0.00031	17.3977
104	3863.43	97.24	7.40685	0.06911	7.33774					104	3969.44	99.91	17.4085	0.00079	17.4077
105	3849.45	96.89	10.3594	0.07272	10.2867					105	3906.17	98.32	17.4141	0.07237	17.3417
106	3924.15	98.77	10.1199	0.07289	10.047					106	3971.7	99.97	17.4046	0.00028	17.4043
107	3851.17	96.93	8.34412	0.07264	8.27148					107	3898.34	98.12	17.4321	0.00111	17.431
108	3774.59	95.01	10.464	0.07364	10.3904					108	3946.65	99.34	17.4163	0.00121	17.4151
109	3945.61	99.31	8.90085	0.06949	8.83136					109	3894.43	98.02	17.4053	0.06691	17.3384
110	3958.02	99.62	8.82366	0.06851	8.75515					110	3962.98	99.75	17.3489	0.01535	17.3336
111	3876.69	97.58	6.95711	0.07089	6.88622					111	3958.71	99.64	17.3641	0.06754	17.2966
112	3964.22	99.78	8.95449	0.04573	8.90876					112	3949.41	99.41	17.4262	0.00037	17.4258
113	3802.4	95.71	9.11291	0.07184	9.04107					113	3922.4	98.73	17.4281	0.07027	17.3578
114	3841.94	96.7	9.48279	0.07022	9.41257					114	3926.09	98.82	17.4124	0.07221	17.3402
115	3796.72	95.56	8.13345	0.0737	8.05975					115	3898.36	98.12	17.3799	0.069	17.3109
116	3970.95	99.95	8.00386	0.0704	7.93346					116	3949.11	99.4	17.4151	0.07307	17.342
117	3908.91	98.39	5.14059	0.0719	5.06869					117	3896.52	98.07	17.3971	0.06831	17.3288
118	3923.18	98.75	7.90608	0.06857	7.83751					118	3967.84	99.87	17.3344	0	17.3344
119	3968.88	99.9	9.99983	0.00082	9.99901					119	3930.43	98.93	17.4224	0.07128	17.3511
120	3932.28	98.97	9.90873	0.00113	9.9076					120	3842.73	96.72	17.4014	0.07115	17.3302
121	3971.38	99.96	9.72582	0.00082	9.725					121	3964.09	99.78	17.4225	0.07463	17.3479
122	3956.66	99.59	9.21105	0.07174	9.13931					122	3863.77	97.25	17.3168	0.01651	17.3003
123	3954.92	99.54	8.45302	0.07176	8.38126					123	3937.45	99.1	17.4086	0.00125	17.4074
124	3972.5	99.99	8.33159	0.03158	8.30001					124	3945.61	99.31	17.3	0.07138	17.2287
125	3710.44	93.39	10.6035	0.07482	10.5287					125	3944.58	99.28	17.4361	0.07394	17.3622
126	3820.57	96.16	10.1021	0.07017	10.032					126	3949.75	99.41	17.4095	0.07392	17.3356
127	3787.88	95.34	9.85863	0.07294	9.78569					127	3868.58	97.37	17.2695	0.06771	17.2018
128	3943.03	99.25	10.2795	0.07203	10.2074					128	3962.67	99.74	17.3637	0.07254	17.2912
129	3926.09	98.82	10.6094	0.07415	10.5353					129	3962.16	99.73	17.4228	0.0004	17.4224
130	3780.19	95.15	8.18967	0.06977	8.1199					130	3962.16	99.73	17.4409	0.00015	17.4408
131	3949.75	99.41	9.37626	0.06696	9.3093					131	3972.67	99.99	17.4075	0.00035	17.4071
132	3933.39	99	7.18198	0.06981	7.11217					132	3620.49	91.13	17.4406	0.06982	17.3708
133	3926.14	98.82	9.80236	0.05729	9.74507					133	3972.67	99.99	17.3853	0.00065	17.3847
134	3930.43	98.93	9.21531	0.07141	9.1439					134	3971.46	99.96	17.4384	0.00033	17.4381
135	3966.21	99.83	4.30693	0.00039	4.30654					135	3931.95	98.97	17.4038	0.00612	17.3977
136	3941.77	99.21	9.28271	0.06839	9.21432					136	3907.36	98.35	17.2022	0.07415	17.1281
137	3946.76	99.34	8.40734	0.07216	8.33518					137	3964.27	99.78	17.4149	0.00084	17.4141
138	3867.64	97.35	9.75123	0.01795	9.73328					138	3773.53	94.98	17.3344	0.0036	17.3308
139	3813.45	95.98	10.4269	0.0702	10.3567					139	3885.74	97.8	17.3682	0.00015	17.368
140	3925.45	98.8	9.95873	0.07208	9.88665					140	3956.47	99.58	17.3728	0.00012	17.3727
141	3895.98	98.06	8.6535	0.07179	8.58171					141	3767.11	94.82	17.3673	0.07178	17.2956
142	3841.45	96.69	8.34715	0.07134	8.27581					142	3898.76	98.13	17.4315	0.07244	17.359
143	3898.19	98.12	10.5044	0.0692	10.4352					143	3956.47	99.58	17.4274	0.00105	17.4264
144	3908.91	98.39	9.61331	0.07222	9.54109					144	3951.99	99.47	17.4341	0.0008	17.4333
145	3953.28	99.5	4.81808	0.06808	4.75					145	3962.01	99.72	17.4412	0.00033	17.4409
146	3889.73	97.9	6.20404	0.07203	6.13201					146	3970.73	99.94	17.3387	0	17.3387
147	3968.29	99.88	9.12124	0.07133	9.04991					147	3902.89	98.24	17.3932	0.0709	17.3223
148	3968.36	99.88	9.07874	0.07432	9.00442					148	3850.82	96.92	17.3351	0.07165	17.2635
149	3940.82	99.19	8.16935	0.07364	8.09571					149	3945.61	99.31	17.252	0.00545	17.2465
150	3749.51	94.37	7.67171	0.07035	7.60136					150	3939.71	99.16	17.4245	0.00078	17.4237
151	3957.81	99.62	7.24374	0.07347	7.17027					151	3945.67	99.31	17.4086	0.07038	17.3382
152	3950.27	99.43	9.12474	0.07025	9.05449					152	3963.71	99.77	17.4237	0.07438	17.3493
153	3964.59	99.79	10.601	0.00092	10.6001					153	3970.41	99.93	17.3663	0.00016	17.3662
154	3949.43	99.41	4.38009	0.07321	4.30688					154	3968.36	99.88	17.4259	0.00158	17.4243
155	3959.05	99.65	10.0702	0.0669	10.0033					155	3933.2	99	17.352	0.06869	17.2833
156	3895.74	98.06	9.7822	0.06972	9.71248					156	3823.84	96.25	17.4208	0.06894	17.3519
157	3955.44	99.56	10.3432	0.06826	10.275					157	3952.43	99.48	17.3913	0.06825	17.3231
158	3895.1	98.04	8.73373	0.06906	8.66467					158	3859.79	97.15	17.4081	0.07141	17.3367
159	3942.85	99.24	10.2229	0.07112	10.1517					159	3960.74	99.69	17.4432	0.07416	17.3691
160	3900.96	98.19	9.07207	0.06863	9.00344					160	3973.01	100	17.4135	0.00065	17.4128
161	3935.83	99.06	10.5705	0.00113	10.5694					161	3963.33	99.76	17.4327	0.07362	17.3591
162	3940.44	99.18	7.50577	0.0006	7.50517					162	3882.28	97.72	17.4078	0.07139	17.3365
163	3930.1	98.92	6.36506	0.07113	6.29393					163	3890.3	97.92	17.434	0.0706	17.3634
164	3955.04	99.55	8.51394	0.07424	8.4397					164	3939.06	99.15	17.4241	0.00123	17.4229
165	3917.43	98.6	8.63572	0.0751	8.56062					165	3784.33	95.25	17.3895	0.06902	17.3205
166	3932.51	98.98	10.1764	0.07075	10.1056					166	3942.62	99.24	17.4152	0.00071	17.4145
167	3966.53	99.84	10.8109	0.03664	10.7742					167	3954.58	99.54	17.4228	0.0009	17.4219
168	3939.5	99.16	7.76063	0.07221	7.68842					168	3845.83	96.8	17.4404	0.075	17.3654
169	3793.62	95.48	3.38027	0.07358	3.30669					169	3871.32	97.44	17.2965	0.06997	17.2266
170	3901.53	98.2	8.99785	0.06619	8.93166					170	3941.14	99.2	17.4095	0.07205	17.3375
171	3841.94	96.7	10.5915	0.07221	10.5193					171	3923.57	98.76	17.3378	0.07168	17.2661
172	3955.8	99.57	9.31548	0.0756	9.23988					172	3972.5	99.99	17.402	0.00073	17.4013
173	3904.81	98.28	8.46824	0.06859	8.39965					173	3834.75	96.52	17.4292	0.07029	17.3589
174	3937.12	99.1	9.88248	0.04768	9.8348					174	3878	97.61	17.4351	0.07381	17.3613
175	3967.84	99.87	8.1506	0.07264	8.07796					175	3968.47	99.89	17.4124	0.00118	17.4113
176	3928.08	98.87	7.89722	0.06718	7.83004					176	3959.24	99.65	17.416	0.07126	17.3447
177	3969.39	99.91	9.89122	0.07072	9.8205					177	3894.43	98.02	17.409	0.06881	17.3402
178	3968.36	99.88	6.21435	0.06812	6.14623					178	3935.83	99.06	17.3779	0.003	17.3749
179	3893.4	98	9.73904	0.06986	9.66918					179	3926.47	98.83	17.4414	0.075	17.3664
180	3968.82	99.89	10.3053	0.07498	10.2303					180	3955.04	99.55	17.419	0.07015	17.3489
181	3931.65	98.96	9.32453	0.07269	9.25184					181	3924.22	98.77	17.4244	0.06925	17.3552
182	3969.91	99.92	9.37876	0.0748	9.30396					182	3914.8	98.53	17.4157	0.07164	17.344
183	3971.98	99.97	9.61673	0.03738	9.57935					183	3902.19	98.22	17.4239	0.06991	17.354
184	3964.59	99.79	7.98297	0.07124	7.91173					184	3908.48	98.38	17.4226	0.07509	17.3475
185	3972.03	99.98	8.95515	0.05817	8.89698					185	3939.8	99.16	17.1878	0.07531	17.1125
186	3911.49	98.45	9.6081	0.07209	9.53601					186	3947.88	99.37	17.4116	0.0675	17.3441
187	3946.32	99.33	9.30097	0.07125	9.22972					187	3862.38	97.22	17.2938	0.07125	17.2226
188	3972.67	99.99	8.18489	0.02814	8.15675					188	3972.5	99.99	17.4163	0.0029	17.4134
189	3696.94	93.05	10.7995	0.07148	10.728					189	3934.49	99.03	17.432	0.07095	17.3611
190	3959.05	99.65	10.7041	0.02251	10.6815					190	3860.15	97.16	17.4415	0.06969	17.3718
191	3815.57	96.04	9.05514	0.07175	8.98339					191	3954.58	99.54	17.4329	0.00071	17.4322
192	3954.92	99.54	8.19478	0.07017	8.12461					192	3940.44	99.18	17.4282	0.00119	17.4271
193	3884.61	97.77	10.6319	0.07323	10.5587					193	3949.23	99.4	17.4092	0.07121	17.338
194	3934.75	99.04	10.0564	0.07026	9.98612					194	3972.35	99.98	17.3502	0.00024	17.35
195	3962.16	99.73	7.00391	0.07101	6.9329					195	3948.72	99.39	17.4404	0.06982	17.3706
196	3851.52	96.94	7.70727	0.06929	7.63798					196	3878.4	97.62	17.4237	0.07015	17.3535
197	3965.7	99.82	6.26872	0.07382	6.1949					197	3954.39	99.53	17.2535	0.07287	17.1806
198	3834.98	96.53	10.0768	0.06883	10.008					198	3958.02	99.62	17.4255	0.0668	17.3587
199	3968.36	99.88	9.80666	0.07003	9.73663					199	3946.65	99.34	17.4162	0.07018	17.346
200	3856.69	97.07	9.98859	0.07008	9.91851					200	3940.96	99.19	17.4379	0.00098	17.437

## Sheet: 03_EACO_Seeds(50)
Fast Converegnce Exp							Fast Converegnce Exp			Slow Converegnce Exp							Slow Converegnce Exp
#	CBLF	Quality	Taumax	Taumin	DeltaTauminmax		Global Optimal Solution =	3973		#	CBLF	Quality	Taumax	Taumin	DeltaTauminmax		Global Optimal Solution =	3973
1	3939.06	99.15	8.35752	0.07113	8.28639		Minimum Optimal Solution=	3663.34		1	3939.06	99.15	17.2885	0.01647	17.272		Minimum Optimal Solution =	3502.02
2	3931.65	98.96	7.24709	0.07015	7.17694		Mean of Optimal Solution =	3918.27		2	3859.57	97.14	17.4406	0.00015	17.4404		Mean of Optimal Solution =	3917.33
3	3961.94	99.72	7.79244	0.07368	7.71876		Median of Optimal Solution =	3918.27		3	3968.36	99.88	17.4207	0.06922	17.3515		Median of Optimal Solution =	3917.33
4	3928.67	98.88	9.56358	0.07163	9.49195		Solution Standrad Deviation =	60.8014		4	3724.72	93.75	17.4469	0.06933	17.3775		Solution Standrad Deviation =	62.5202
5	3869.22	97.39	11.1504	0.07275	11.0777		Average Price =	16.415		5	3945.23	99.3	17.3681	0.07064	17.2974		Average Price =	64.24
6	3898.01	98.11	9.71621	0.07153	9.64468		Relability =	12		6	3961.94	99.72	17.1278	0.07007	17.0578		Relability =	11.5
7	3966.86	99.85	9.77084	0.00102	9.76982		Normalized Price =	136.792		7	3861.97	97.21	17.4289	0.06965	17.3592		Normalized Price =	558.609
8	3904.46	98.27	6.46889	0.07134	6.39755		Average Solution Quality =	98.6222		8	3967.99	99.87	17.3788	0.07243	17.3063		Average Solution Quality =	98.5986
9	3918.08	98.62	10.2288	0.07153	10.1572		Average FDC =	-82.1107		9	3785.01	95.27	17.4411	0.07146	17.3696		Average FDC =	-29.1403
10	3939.8	99.16	10.0942	0.07232	10.0219		Correlation Coefficent =	-0.82429		10	3937.59	99.11	17.4265	0.07069	17.3558		Correlation Coefficent =	-0.87187
11	3702.63	93.19	7.86506	0.06767	7.79739		Solution Robustness =	64.4438		11	3943.03	99.25	17.423	0.06786	17.3551		Solution Robustness =	62.6571
12	3968.15	99.88	6.61808	0.07084	6.54724		Performance Rate =	0.0073104		12	3958.78	99.64	17.4181	0.00176	17.4163		Performance Rate =	0.0017902
13	3943.91	99.27	6.93639	0.06902	6.86737		Average Elapsed Time =	0.75747		13	3954.51	99.53	17.3774	0.07025	17.3072		Average Elapsed Time =	2.944
14	3904.88	98.29	10.4272	0.06935	10.3579					14	3925.4	98.8	17.4366	0.07027	17.3663
15	3873.28	97.49	10.0834	0.07247	10.0109					15	3962.77	99.74	17.3273	0.07515	17.2521
16	3920.55	98.68	8.86337	0.07158	8.79179					16	3803.96	95.74	17.199	0.07088	17.1282
17	3943.59	99.26	9.74509	0.04133	9.70376					17	3928.1	98.87	17.4269	0.072	17.3549
18	3882.29	97.72	9.66762	0.07331	9.59431					18	3943.26	99.25	17.3503	0.00404	17.3462
19	3970.73	99.94	8.34176	0.01299	8.32877					19	3923.39	98.75	17.3747	0.06903	17.3057
20	3954.25	99.53	9.97005	0.01805	9.952					20	3959.57	99.66	17.3963	0.07339	17.3229
21	3681.39	92.66	10.8128	0.07127	10.7415					21	3841.18	96.68	17.4195	0.07183	17.3477
22	3937.29	99.1	5.93618	0.0718	5.86438					22	3917.18	98.59	17.4438	0.07379	17.37
23	3952.64	99.49	9.48838	0.03364	9.45474					23	3955.44	99.56	17.429	0.07346	17.3555
24	3969.39	99.91	7.1698	0.0718	7.098					24	3947.58	99.36	17.3492	0.07109	17.2781
25	3953.05	99.5	9.59244	0.0725	9.51994					25	3887.8	97.86	17.4326	0.06951	17.3631
26	3959.57	99.66	9.33611	0.07302	9.26309					26	3925.81	98.81	17.3591	0.0029	17.3562
27	3908.39	98.37	9.09736	0.07299	9.02437					27	3880.24	97.66	17.4316	0.07054	17.3611
28	3914.89	98.54	4.44699	0.07043	4.37656					28	3943.55	99.26	17.422	0.07297	17.3491
29	3927.52	98.85	6.99576	0.07055	6.92521					29	3970.95	99.95	17.4284	0.00104	17.4274
30	3945.1	99.3	8.31029	0.0036	8.30669					30	3972.35	99.98	17.292	0.00022	17.2918
31	3732.09	93.94	8.70155	0.07148	8.63007					31	3838.92	96.63	17.4178	0.0722	17.3456
32	3961.04	99.7	5.69389	0.07151	5.62238					32	3922.58	98.73	17.4084	0.00214	17.4062
33	3948.2	99.38	9.64217	0.06943	9.57274					33	3962.45	99.73	17.4481	0.07309	17.375
34	3956.47	99.58	8.95059	0.07306	8.87753					34	3808.16	95.85	17.3489	0.06503	17.2839
35	3887.03	97.84	9.54018	0.06996	9.47022					35	3971.06	99.95	17.3728	0.00015	17.3727
36	3908.69	98.38	9.0463	0.07322	8.97308					36	3915.61	98.56	17.3902	0.07007	17.3201
37	3921.38	98.7	9.88578	0.07233	9.81345					37	3962.16	99.73	17.3327	0.00088	17.3318
38	3949.75	99.41	7.70882	0.00067	7.70815					38	3928.03	98.87	17.3927	0.06774	17.325
39	3957.5	99.61	5.82051	0.06906	5.75145					39	3875.3	97.54	17.1872	0.07385	17.1134
40	3971.85	99.97	8.17754	0.06534	8.1122					40	3952.48	99.48	17.3873	0.07057	17.3167
41	3959.05	99.65	10.2375	0.01806	10.2194					41	3799.42	95.63	17.3988	0.06833	17.3305
42	3971.06	99.95	8.57738	0.05861	8.51877					42	3954.69	99.54	17.4237	0.07229	17.3514
43	3903.22	98.24	9.32676	0.07601	9.25075					43	3840.92	96.68	17.4387	0.07256	17.3661
44	3888.49	97.87	9.53705	0.07446	9.46259					44	3956.19	99.58	17.3766	0.00207	17.3745
45	3927.7	98.86	3.45083	0.07261	3.37822					45	3957.51	99.61	17.4334	0.07153	17.3619
46	3935.27	99.05	10.3696	0.07111	10.2985					46	3962.16	99.73	17.4347	1e-05	17.4347
47	3955.44	99.56	8.94845	0.04051	8.90794					47	3852.04	96.96	17.3974	0.06998	17.3275
48	3939.92	99.17	9.83731	0.06889	9.76842					48	3972.35	99.98	17.4001	0.00024	17.3999
49	3935.51	99.06	10.6733	0.00113	10.6722					49	3950.27	99.43	17.4418	0.00033	17.4414
50	3908.91	98.39	10.4882	0.0731	10.4151					50	3905.26	98.29	17.1551	0.07189	17.0832
51	3970.73	99.94	10.2399	0.00092	10.239					51	3971.52	99.96	17.3802	0.07133	17.3089
52	3946.61	99.34	10.2824	0.07602	10.2064					52	3926.15	98.82	17.4005	0.0698	17.3307
53	3949.23	99.4	9.92118	0.07467	9.84651					53	3960.39	99.68	17.2764	0.02505	17.2514
54	3940.44	99.18	9.21112	0.07146	9.13966					54	3938.74	99.14	17.4218	0.00198	17.4198
55	3887.7	97.85	8.89611	0.07306	8.82305					55	3952.33	99.48	17.3745	0.00598	17.3685
56	3962.77	99.74	8.59351	0.07515	8.51836					56	3966.86	99.85	17.4157	0.00185	17.4138
57	3821.22	96.18	9.64035	0.07407	9.56628					57	3910.12	98.42	17.4224	0.07031	17.3521
58	3939.59	99.16	7.87537	0.06873	7.80664					58	3973	100	17.4198	0.00126	17.4185
59	3966.88	99.85	9.66664	0.07324	9.5934					59	3904.94	98.29	17.4347	0.07167	17.3631
60	3958.54	99.64	9.50791	0.07334	9.43457					60	3943.59	99.26	17.4349	0.00041	17.4345
61	3972.03	99.98	9.00767	0.07481	8.93286					61	3790.41	95.4	17.4477	0.00065	17.447
62	3944.88	99.29	8.65894	0.07153	8.58741					62	3918.73	98.63	17.435	0.07367	17.3614
63	3949.23	99.4	6.51541	0.07249	6.44292					63	3893.93	98.01	17.4344	0.07331	17.3611
64	3915.19	98.54	8.66021	0.07073	8.58948					64	3954.02	99.52	17.4299	0.07487	17.3551
65	3940.96	99.19	8.59227	0.06962	8.52265					65	3972.67	99.99	17.4337	0.00016	17.4335
66	3964.09	99.78	9.74464	0.06944	9.6752					66	3955.55	99.56	17.4367	0.00029	17.4364
67	3889.65	97.9	10.3282	0.07095	10.2572					67	3970.73	99.94	17.1777	4e-05	17.1777
68	3971.46	99.96	8.60001	0.06776	8.53225					68	3809.13	95.88	17.4387	0.0725	17.3662
69	3863.21	97.24	10.211	0.06991	10.1411					69	3969.39	99.91	17.3276	0.00024	17.3273
70	3962.16	99.73	10.81	0.07029	10.7397					70	3793.62	95.48	17.2613	0.06868	17.1926
71	3964.22	99.78	9.01242	0.00324	9.00918					71	3796.5	95.56	17.4355	0.07206	17.3635
72	3908.39	98.37	9.28946	0.07013	9.21933					72	3957.48	99.61	17.415	0.00121	17.4138
73	3923.39	98.75	10.0914	0.06903	10.0224					73	3934.81	99.04	17.2506	0.07492	17.1757
74	3921.52	98.7	9.11229	0.07049	9.0418					74	3894.22	98.02	17.4388	0.07361	17.3652
75	3960.39	99.68	8.73021	0.0464	8.68381					75	3846.87	96.83	17.4255	0.06893	17.3565
76	3663.34	92.21	7.17537	0.06939	7.10598					76	3939.21	99.15	17.387	0.06788	17.3191
77	3956.47	99.58	8.36093	0.00102	8.35991					77	3888.23	97.87	17.3778	0.07463	17.3032
78	3928.35	98.88	8.70222	0.06674	8.63548					78	3797.24	95.58	17.4434	0.07176	17.3716
79	3883.06	97.74	9.73272	0.07156	9.66116					79	3940.82	99.19	17.3634	0.0719	17.2915
80	3938.38	99.13	9.54146	0.0703	9.47116					80	3928.49	98.88	17.418	0.06959	17.3484
81	3949.82	99.42	9.47588	0.07454	9.40134					81	3970.73	99.94	17.1684	0.03119	17.1372
82	3968.47	99.89	9.34833	0.02663	9.3217					82	3853.65	97	17.4388	0.07184	17.3669
83	3918.72	98.63	9.8535	0.06738	9.78612					83	3960.72	99.69	17.435	1e-05	17.435
84	3952.99	99.5	10.5783	0.07328	10.505					84	3896.73	98.08	17.3963	0.00378	17.3925
85	3969.76	99.92	10.0961	0.00082	10.0953					85	3901.34	98.2	17.4349	0.07051	17.3644
86	3959.57	99.66	9.01176	0.06871	8.94305					86	3874.27	97.51	17.4432	0.06971	17.3735
87	3970.43	99.94	9.10474	0.06992	9.03482					87	3969.12	99.9	17.4281	0.00014	17.428
88	3973	100	9.97532	0.06913	9.90619					88	3810.68	95.91	17.435	0.07027	17.3647
89	3906.75	98.33	8.55931	0.07388	8.48543					89	3931.26	98.95	17.4352	0.07068	17.3646
90	3810.55	95.91	7.73551	0.06965	7.66586					90	3962.16	99.73	17.4457	0.00018	17.4455
91	3970.41	99.93	8.35473	0.07345	8.28128					91	3967.33	99.86	17.1488	0.00013	17.1487
92	3969.76	99.92	10.0708	0.04811	10.0227					92	3921.31	98.7	17.4373	0.07192	17.3653
93	3958.78	99.64	9.8287	0.02187	9.80683					93	3850.52	96.92	17.2002	0.02672	17.1734
94	3959.57	99.66	8.42894	0.07204	8.3569					94	3924.2	98.77	17.442	0.00031	17.4417
95	3923.88	98.76	10.6344	0.01944	10.615					95	3958.02	99.62	17.331	0.06907	17.2619
96	3962.98	99.75	8.85062	0.05317	8.79745					96	3954.02	99.52	17.4315	0.07099	17.3605
97	3969.58	99.91	9.53487	0.06941	9.46546					97	3966.56	99.84	17.296	0.07144	17.2246
98	3946.85	99.34	8.48633	0.07147	8.41486					98	3502.02	88.15	17.3406	0.07171	17.2689
99	3844.28	96.76	9.90478	0.06883	9.83595					99	3856.54	97.07	17.4429	0.07246	17.3705
100	3957.28	99.6	10.4353	0.07143	10.3639					100	3953.37	99.51	17.3742	0.07364	17.3006
101	3904.81	98.28	9.92014	0.03937	9.88077					101	3885.74	97.8	17.2287	0.0197	17.209
102	3968.88	99.9	10.0382	0.07043	9.96776					102	3918.21	98.62	17.2955	0.06894	17.2265
103	3883.57	97.75	9.59529	0.06703	9.52826					103	3952.46	99.48	17.3981	0.07125	17.3269
104	3921.31	98.7	9.16704	0.07245	9.09459					104	3919.04	98.64	17.4387	0.07226	17.3665
105	3852.84	96.98	10.1509	0.06898	10.0819					105	3898.96	98.14	17.4365	0.07043	17.3661
106	3930.78	98.94	9.06467	0.07101	8.99366					106	3906.32	98.32	17.4435	0.07277	17.3708
107	3930.62	98.93	9.59206	0.07214	9.51992					107	3951.82	99.47	17.4369	0.07262	17.3642
108	3841.94	96.7	8.96221	0.07315	8.88906					108	3863.77	97.25	17.4181	0.00047	17.4176
109	3949.52	99.41	5.44309	0.06847	5.37462					109	3710.17	93.38	17.4338	0.07065	17.3632
110	3966.35	99.83	8.59119	0.07271	8.51848					110	3970.41	99.93	17.4248	0.00103	17.4238
111	3885.12	97.79	10.3621	0.07273	10.2893					111	3947.47	99.36	17.4002	0.00165	17.3986
112	3920.15	98.67	7.33481	0.07086	7.26395					112	3970.73	99.94	17.168	0.03526	17.1327
113	3890.41	97.92	9.3217	0.07106	9.25064					113	3961.39	99.71	17.4293	0.07218	17.3572
114	3916.14	98.57	10.3753	0.07294	10.3023					114	3962.16	99.73	17.3723	0	17.3723
115	3971.38	99.96	7.42587	0.07265	7.35322					115	3966.88	99.85	17.443	0.07415	17.3688
116	3933.36	99	9.87223	0.07559	9.79664					116	3953.28	99.5	16.9584	3e-05	16.9584
117	3964.92	99.8	9.97704	0.07283	9.90421					117	3951.82	99.47	17.2177	0.07345	17.1443
118	3905.92	98.31	9.61469	0.06746	9.54723					118	3965.78	99.82	17.3976	0.00127	17.3963
119	3910.07	98.42	8.80605	0.0707	8.73535					119	3930.62	98.93	17.3473	0.01692	17.3304
120	3929.25	98.9	7.48118	0.07122	7.40996					120	3870.87	97.43	17.4436	0.06868	17.375
121	3860.95	97.18	9.96643	0.07236	9.89407					121	3972.35	99.98	17.4063	0.00401	17.4023
122	3741.4	94.17	9.8505	0.07079	9.77971					122	3787.93	95.34	17.4338	0.07021	17.3636
123	3943.03	99.25	10.0818	0.07553	10.0063					123	3929.9	98.91	17.4339	0.07341	17.3605
124	3949.23	99.4	8.75402	0.01871	8.73531					124	3910.96	98.44	17.4361	0.07238	17.3637
125	3928.72	98.89	10.8483	0.02058	10.8277					125	3883.57	97.75	17.435	0.06947	17.3655
126	3966.53	99.84	8.90916	0.01811	8.89105					126	3852.58	96.97	17.2415	0.07018	17.1713
127	3972.35	99.98	7.16125	0.0729	7.08835					127	3886.51	97.82	17.4305	0.07189	17.3586
128	3966.53	99.84	10.0158	0.01897	9.99686					128	3954.02	99.52	17.4082	0.07171	17.3365
129	3894.43	98.02	8.7038	0.06972	8.63408					129	3889.26	97.89	17.4347	0.07161	17.3631
130	3839.51	96.64	10.0272	0.07325	9.95392					130	3962.67	99.74	17.443	0.00018	17.4428
131	3960.09	99.67	11.2578	0.07099	11.1868					131	3921.31	98.7	17.3174	0.07088	17.2466
132	3824.45	96.26	8.26082	0.07206	8.18876					132	3946.2	99.33	17.4334	0.07173	17.3617
133	3732.15	93.94	10.228	0.06628	10.1618					133	3943.55	99.26	17.4238	0.00329	17.4205
134	3952.8	99.49	9.87732	0.07004	9.80728					134	3947.47	99.36	17.4332	0.00032	17.4329
135	3741.62	94.18	10.6285	0.06775	10.5607					135	3949.23	99.4	17.4243	0.07172	17.3526
136	3910.3	98.42	10.9404	0.0036	10.9368					136	3967.84	99.87	17.3967	0.07439	17.3223
137	3865.48	97.29	10.0181	0.06772	9.95041					137	3896.5	98.07	17.4185	0.07059	17.3479
138	3959.91	99.67	5.94343	0.07291	5.87052					138	3751.86	94.43	17.4333	0.07065	17.3627
139	3893.2	97.99	10.4339	0.07065	10.3633					139	3958.78	99.64	17.2823	0.02598	17.2563
140	3706.26	93.29	9.92991	0.06934	9.86057					140	3917.11	98.59	17.2996	0.07381	17.2258
141	3828.57	96.36	9.58014	0.06932	9.51082					141	3965.26	99.8	17.2881	0.0098	17.2783
142	3841.7	96.69	9.88657	0.07114	9.81543					142	3962.67	99.74	17.4049	0.00102	17.4039
143	3924.54	98.78	10.3634	0.07161	10.2918					143	3929.07	98.89	17.2595	0.00017	17.2593
144	3706.76	93.3	8.74344	0.06961	8.67383					144	3970.73	99.94	17.4139	1e-05	17.4139
145	3969.12	99.9	8.51041	0.0722	8.43821					145	3965.7	99.82	17.4265	0.07326	17.3532
146	3916.06	98.57	7.27581	0.07275	7.20306					146	3933.89	99.02	17.2734	0.01708	17.2563
147	3886.68	97.83	9.9658	0.07415	9.89165					147	3952.75	99.49	17.4391	0.07212	17.367
148	3912.01	98.46	10.4424	0.07357	10.3688					148	3969.58	99.91	17.3707	0.07338	17.2973
149	3960.51	99.69	9.72185	0.0726	9.64925					149	3938.89	99.14	17.1268	0.0726	17.0542
150	3882.46	97.72	9.9012	0.06948	9.83172					150	3891.51	97.95	17.3962	0.0683	17.3279
151	3938.12	99.12	10.2171	0.07129	10.1458					151	3971.46	99.96	17.4241	0.00053	17.4235
152	3890.9	97.93	9.18805	0.06784	9.12021					152	3895.41	98.05	17.3713	0.06927	17.3021
153	3899.6	98.15	7.75523	0.06681	7.68842					153	3829.63	96.39	17.4351	0.07183	17.3633
154	3944.06	99.27	8.46934	0.07403	8.39531					154	3969.12	99.9	17.417	0.00076	17.4163
155	3933.69	99.01	10.4352	0.0735	10.3617					155	3927.7	98.86	17.432	0.0714	17.3606
156	3721.41	93.67	7.84927	0.06928	7.77999					156	3855.66	97.05	17.4395	0.07032	17.3692
157	3874.2	97.51	9.12535	0.07326	9.05209					157	3943.68	99.26	17.441	0.07354	17.3675
158	3907.54	98.35	9.27172	0.07072	9.201					158	3931.14	98.95	17.4345	0.07248	17.362
159	3927.52	98.85	7.16048	0.0717	7.08878					159	3942.97	99.24	17.4218	0.0708	17.351
160	3934.24	99.02	8.36677	0.07389	8.29288					160	3896.49	98.07	17.4374	0.07367	17.3637
161	3909.94	98.41	9.90717	0.06524	9.84193					161	3968.36	99.88	17.3919	0.00057	17.3913
162	3972.5	99.99	8.84227	0.07247	8.7698					162	3917.11	98.59	17.3644	0.07145	17.2929
163	3966.86	99.85	9.79993	0.03364	9.76629					163	3897.53	98.1	17.4031	0.07211	17.331
164	3962.67	99.74	9.45725	0.06884	9.38841					164	3851.24	96.94	17.4396	0.0706	17.369
165	3905.13	98.29	9.32278	0.05725	9.26553					165	3941.15	99.2	17.3273	0.06956	17.2577
166	3971.98	99.97	7.5659	0.06981	7.49609					166	3966.21	99.83	17.4043	0.00017	17.4041
167	3964.74	99.79	9.18852	0.07215	9.11637					167	3884.09	97.76	17.443	0.07235	17.3706
168	3971.06	99.95	8.33411	0.04744	8.28667					168	3967.84	99.87	17.4431	0.06939	17.3737
169	3856.88	97.08	10.1052	0.07085	10.0343					169	3788.67	95.36	17.4444	0.06946	17.3749
170	3877.75	97.6	9.23522	0.07225	9.16297					170	3883.16	97.74	17.4432	0.00017	17.443
171	3928.49	98.88	8.77156	0.07084	8.70072					171	3936.31	99.08	17.4323	0.07009	17.3622
172	3970.41	99.93	9.61638	0.07205	9.54433					172	3945.32	99.3	17.4255	0.07003	17.3554
173	3933.39	99	9.52798	0.07109	9.45689					173	3964.09	99.78	17.4416	0.07174	17.3698
174	3972.35	99.98	9.20198	0.06952	9.13246					174	3971.98	99.97	17.4243	0.07408	17.3503
175	3885.54	97.8	10.9636	0.06872	10.8949					175	3973	100	17.4141	0.00033	17.4138
176	3917.7	98.61	9.80579	0.07319	9.7326					176	3871.84	97.45	17.3696	0.0003	17.3693
177	3905.74	98.31	9.70974	0.0721	9.63764					177	3842.69	96.72	17.4444	0.07231	17.3721
178	3820.87	96.17	8.09192	0.07115	8.02077					178	3881.31	97.69	17.3957	0.07338	17.3223
179	3964.74	99.79	5.98125	0.07199	5.90926					179	3958.54	99.64	17.4244	0.00055	17.4238
180	3784.52	95.26	8.24241	0.06912	8.17329					180	3949.73	99.41	17.4436	0.00017	17.4435
181	3952.99	99.5	9.79257	0.07144	9.72113					181	3919.39	98.65	17.4345	0.07269	17.3618
182	3908.66	98.38	8.05388	0.07111	7.98277					182	3968.36	99.88	17.4161	0.0739	17.3422
183	3968.47	99.89	11.0055	0.02228	10.9832					183	3784.93	95.27	17.4216	0.07159	17.35
184	3926.25	98.82	7.33551	0.07314	7.26237					184	3923.88	98.76	17.4221	0.00041	17.4217
185	3911.27	98.45	6.65886	0.0702	6.58866					185	3969.14	99.9	17.41	0.06847	17.3415
186	3949.43	99.41	9.76546	0.07396	9.6915					186	3930.1	98.92	17.4223	0.07089	17.3514
187	3958.45	99.63	5.82767	0.06666	5.76101					187	3933.78	99.01	17.3664	0.07086	17.2955
188	3973	100	9.29537	0.0617	9.23367					188	3960.24	99.68	17.4355	0.06805	17.3674
189	3947.79	99.37	8.56529	0.06349	8.5018					189	3782.24	95.2	17.2812	0.06709	17.2141
190	3943.29	99.25	8.91973	0.07419	8.84554					190	3952.85	99.49	17.4327	0.07191	17.3608
191	3965.24	99.8	9.13359	0.07053	9.06306					191	3966.86	99.85	17.393	0.0016	17.3914
192	3971.52	99.96	9.33964	0.07177	9.26787					192	3908.31	98.37	17.4132	0.06769	17.3455
193	3883.28	97.74	9.74077	0.07368	9.66709					193	3953.28	99.5	17.4188	0.00013	17.4187
194	3926.25	98.82	7.93881	0.07191	7.8669					194	3962.16	99.73	17.4252	0.07265	17.3525
195	3906.84	98.33	10.0887	0.07055	10.0182					195	3964.74	99.79	17.2415	0.0193	17.2222
196	3957.5	99.61	6.18935	0.07162	6.11773					196	3970.73	99.94	17.4201	0.00156	17.4186
197	3906.84	98.33	9.03065	0.07401	8.95664					197	3912.53	98.48	17.4169	0.07287	17.344
198	3934.24	99.02	10.327	0.0713	10.2557					198	3941.99	99.22	17.4193	0.07139	17.3479
199	3964.59	99.79	10.0198	0.02417	9.99567					199	3970.41	99.93	17.4279	0.00015	17.4277
200	3971.52	99.96	7.41982	0.07136	7.34846					200	3931.65	98.96	17.4318	0.00013	17.4317

## Sheet: 04_EACO_Seeds(75)
Fast Converegnce Exp							Fast Converegnce Exp			Slow Converegnce Exp							Slow Converegnce Exp
#	CBLF	Quality	Taumax	Taumin	DeltaTauminmax		Global Optimal Solution =	3973.01		#	CBLF	Quality	Taumax	Taumin	DeltaTauminmax		Global Optimal Solution =	3972.67
1	3843.77	96.75	9.40621	0.07199	9.33422		Minimum Optimal Solution =	3518.51		1	3843.77	96.75	17.4364	0.07199	17.3644		Minimum Optimal Solution =	3714.52
2	3939.01	99.14	8.38412	0.07215	8.31197		Mean of Optimal Solution =	3921.29		2	3930.01	98.92	17.3753	0.00168	17.3736		Mean of Optimal Solution =	3919.95
3	3857.89	97.1	8.42569	0.07115	8.35454		Median of Optimal Solution =	3921.29		3	3895.47	98.05	17.0936	0.06863	17.025		Median of Optimal Solution =	3919.95
4	3871.02	97.43	8.3346	0.07246	8.26214		Solution Standrad Deviation =	62.9237		4	3924.03	98.77	17.3331	0.06884	17.2643		Solution Standrad Deviation =	52.5887
5	3923	98.74	8.60251	0.06771	8.5348		Average Price =	16.915		5	3961.36	99.71	17.0895	4e-05	17.0894		Average Price =	64.185
6	3949.75	99.41	8.16588	0.06161	8.10427		Relability =	8		6	3915.86	98.56	17.4476	0.07111	17.3765		Relability =	10
7	3972.35	99.98	8.36652	0.07111	8.29541		Normalized Price =	211.438		7	3872.17	97.46	17.4163	0.00014	17.4161		Normalized Price =	641.85
8	3949.23	99.4	8.76039	0.0661	8.69429		Average Solution Quality =	98.6982		8	3932.51	98.98	17.4388	0.07184	17.367		Average Solution Quality =	98.6644
9	3910.24	98.42	10.1691	0.07254	10.0966		Average FDC =	-87.383		9	3880.86	97.68	17.4441	0.07024	17.3739		Average FDC =	-31.689
10	3847.56	96.84	8.62189	0.06666	8.55523		Correlation Coefficent =	-1		10	3966.88	99.85	17.4109	0.07207	17.3389		Correlation Coefficent =	-1
11	3918.73	98.63	9.02062	0.06924	8.95138		Solution Robustness =	62.3182		11	3954.92	99.54	17.3154	0.07429	17.2412		Solution Robustness =	74.5397
12	3927.52	98.85	9.62034	0.07077	9.54957		Performance Rate =	0.0047295		12	3881.83	97.7	17.3967	0.06754	17.3292		Performance Rate =	0.001558
13	3940.38	99.18	8.8343	0.06718	8.76712		Average Elapsed Time =	0.78492		13	3931.14	98.95	17.4129	0.06502	17.3479		Average Elapsed Time =	2.9477
14	3951.67	99.46	9.55501	0.01778	9.53723					14	3787.93	95.34	17.4088	0.07034	17.3384
15	3958.54	99.64	9.99466	0.07269	9.92197					15	3897.22	98.09	17.4022	0.07218	17.3301
16	3972.35	99.98	5.61534	0.0712	5.54414					16	3883.57	97.75	17.4356	0.07206	17.3636
17	3937.45	99.1	9.11934	0.06979	9.04955					17	3940.96	99.19	17.4236	0.07149	17.3521
18	3958.02	99.62	9.1591	0.07798	9.08112					18	3951.76	99.47	17.3559	0.07096	17.285
19	3937.34	99.1	8.99737	0.07166	8.92571					19	3967.84	99.87	17.4301	0.07191	17.3582
20	3950.61	99.44	10.3831	0.07131	10.3118					20	3911.96	98.46	17.4442	0.06922	17.3749
21	3914.83	98.54	9.96596	0.01603	9.94993					21	3840.74	96.67	17.4302	0.07338	17.3568
22	3913.81	98.51	9.7935	0.07113	9.72237					22	3970.09	99.93	17.4196	0.0004	17.4192
23	3880.05	97.66	9.271	0.07251	9.19849					23	3884.59	97.77	17.337	0.07267	17.2643
24	3864.35	97.27	9.42483	0.07083	9.354					24	3967.84	99.87	17.2719	0.01167	17.2602
25	3960.21	99.68	7.94393	0.06953	7.8744					25	3895.08	98.04	17.4082	0.07306	17.3351
26	3960.83	99.69	8.46456	0.07152	8.39304					26	3948.55	99.38	17.4328	0.07056	17.3622
27	3962.98	99.75	9.30968	0.07158	9.2381					27	3954.39	99.53	17.4206	0.0709	17.3497
28	3861.34	97.19	9.24427	0.06943	9.17484					28	3958.13	99.63	17.4159	0.00012	17.4158
29	3902.83	98.23	7.9737	0.07385	7.89985					29	3743.01	94.21	17.4245	0.06552	17.359
30	3924.29	98.77	10.3248	0.0744	10.2504					30	3824.1	96.25	17.3822	0.07244	17.3098
31	3970.41	99.93	10.5353	0.07291	10.4624					31	3924.93	98.79	17.4449	0.07218	17.3727
32	3927	98.84	8.45561	0.07184	8.38377					32	3964.59	99.79	17.1995	0.02216	17.1774
33	3956.19	99.58	9.03799	0.03416	9.00383					33	3970.73	99.94	17.4179	0.00024	17.4176
34	3946.13	99.32	8.15205	0.07029	8.08176					34	3922.67	98.73	17.3704	0.06894	17.3014
35	3943.26	99.25	9.10434	0.0672	9.03714					35	3951.6	99.46	17.4443	0.07367	17.3706
36	3949.52	99.41	8.42615	0.07138	8.35477					36	3769.45	94.88	17.3983	0.0723	17.326
37	3971.06	99.95	6.49506	0.00956	6.4855					37	3884.61	97.77	17.39	0.07205	17.318
38	3881.51	97.7	4.86651	0.07226	4.79425					38	3946.65	99.34	17.3894	0.06847	17.3209
39	3844.28	96.76	10.0265	0.06626	9.96027					39	3971.46	99.96	17.3929	0.00109	17.3918
40	3958.07	99.62	7.43799	0.07191	7.36608					40	3902.94	98.24	17.4283	0.06896	17.3593
41	3961.07	99.7	8.36128	0.06742	8.29386					41	3969.12	99.9	17.4255	0.00068	17.4248
42	3741.24	94.17	8.12412	0.06726	8.05686					42	3933.25	99	17.4299	0.00055	17.4294
43	3879.93	97.66	8.89123	0.02552	8.86571					43	3815.33	96.03	17.4248	0.06885	17.356
44	3908.04	98.36	10.5297	0.02318	10.5066					44	3954.92	99.54	17.4354	0.07214	17.3633
45	3903.19	98.24	6.19689	0.04848	6.14841					45	3825.15	96.28	17.4168	0.07136	17.3454
46	3958.45	99.63	9.61451	0.07085	9.54366					46	3950.27	99.43	17.4058	0.00142	17.4044
47	3915.63	98.56	8.81966	0.07067	8.74899					47	3902.7	98.23	17.4203	0.07205	17.3483
48	3914.5	98.53	7.93534	0.07187	7.86347					48	3951.82	99.47	17.4115	0.07018	17.3413
49	3957.19	99.6	9.60871	0.07081	9.5379					49	3926.48	98.83	17.4323	0.07361	17.3587
50	3958.02	99.62	9.78837	0.07341	9.71496					50	3936.31	99.08	17.4095	0.06776	17.3417
51	3942.39	99.23	7.06366	0.06883	6.99483					51	3920.3	98.67	17.4245	0.06994	17.3545
52	3957.5	99.61	9.16635	0.01628	9.15007					52	3959.57	99.66	17.0688	0.03116	17.0376
53	3973.01	100	5.62668	0.03438	5.5923					53	3970.09	99.93	17.3824	0.00312	17.3793
54	3945.53	99.31	9.4354	0.01623	9.41917					54	3893.4	98	17.3912	0.07237	17.3189
55	3817.92	96.1	10.5943	0.07708	10.5172					55	3928.55	98.88	17.4286	0.07271	17.3559
56	3845.17	96.78	8.26246	0.0695	8.19296					56	3861.78	97.2	17.4459	0.07541	17.3705
57	3926.8	98.84	8.99634	0.07321	8.92313					57	3961.64	99.71	17.3889	0.00354	17.3853
58	3863.53	97.24	10.6393	0.07177	10.5675					58	3937.57	99.11	17.3691	0.07101	17.2981
59	3908.96	98.39	8.43423	0.07048	8.36375					59	3965.26	99.8	17.4169	0.00029	17.4166
60	3783.45	95.23	10.91	0.0685	10.8415					60	3952.31	99.48	17.3822	0.00356	17.3786
61	3916.39	98.57	9.93842	0.06992	9.8685					61	3951.76	99.47	17.419	0.07031	17.3487
62	3921.31	98.7	10.1612	0.07397	10.0872					62	3965.26	99.8	17.3737	0.07523	17.2984
63	3973.01	100	8.92426	0.00082	8.92344					63	3901.58	98.2	17.4309	0.00143	17.4294
64	3961.71	99.72	10.7107	0.06777	10.6429					64	3899.57	98.15	17.425	0.07245	17.3525
65	3958.54	99.64	8.64466	0.06824	8.57642					65	3878.41	97.62	17.4028	0.07187	17.331
66	3927.52	98.85	7.47519	0.07217	7.40302					66	3940.03	99.17	17.4162	0.00112	17.4151
67	3933.25	99	9.98847	0.0206	9.96787					67	3951.34	99.45	17.1543	0.01272	17.1416
68	3848.36	96.86	8.37482	0.07062	8.3042					68	3940.96	99.19	17.4384	0.0003	17.4381
69	3938.83	99.14	10.1427	0.06568	10.077					69	3958.54	99.64	17.4059	0.07279	17.3331
70	3958.02	99.62	10.0849	0.07249	10.0124					70	3854.11	97.01	17.2449	0.00711	17.2378
71	3893.91	98.01	7.76118	0.0663	7.69488					71	3948.72	99.39	17.3297	0.06804	17.2616
72	3936.31	99.08	9.43591	0.06909	9.36682					72	3970.09	99.93	17.4293	0.00126	17.4281
73	3927.52	98.85	9.93615	0.07524	9.86091					73	3946.65	99.34	17.394	0.07148	17.3225
74	3726.84	93.8	10.6974	0.06856	10.6289					74	3965.78	99.82	17.3853	0.00249	17.3828
75	3939.41	99.15	6.71654	0.07018	6.64636					75	3963.71	99.77	17.1723	0.03127	17.141
76	3960.83	99.69	9.45113	0.07245	9.37868					76	3942.51	99.23	17.4466	0.0036	17.443
77	3928.55	98.88	5.10754	0.0732	5.03434					77	3917.9	98.61	17.4179	0.06833	17.3495
78	3943.59	99.26	8.21158	0.07148	8.1401					78	3950.52	99.43	17.2017	0.0725	17.1292
79	3964.92	99.8	9.67943	0.04241	9.63702					79	3902.19	98.22	17.4356	0.07002	17.3656
80	3969.58	99.91	8.02515	0.07299	7.95216					80	3857.97	97.1	17.4329	0.06682	17.3661
81	3555.28	89.49	9.23376	0.06786	9.1659					81	3815.85	96.04	17.4078	0.07198	17.3358
82	3953.93	99.52	9.34004	0.02218	9.31786					82	3937.8	99.11	17.4296	0.06964	17.3599
83	3879.28	97.64	9.32385	0.07255	9.2513					83	3940.44	99.18	17.4256	0.06942	17.3562
84	3965.56	99.81	9.38406	0.07122	9.31284					84	3919.97	98.67	17.3808	0.07271	17.3081
85	3952.85	99.49	8.10974	0.07051	8.03923					85	3817.5	96.09	17.4428	0.06985	17.3729
86	3958.45	99.63	9.79781	0.07267	9.72514					86	3924.42	98.78	17.4191	0.06975	17.3494
87	3942.06	99.22	7.75174	0.068	7.68374					87	3959.42	99.66	17.4409	1e-05	17.4409
88	3887.8	97.86	9.26822	0.0735	9.19472					88	3972.67	99.99	17.4093	0.00066	17.4087
89	3896.72	98.08	8.92599	0.07174	8.85425					89	3852.43	96.97	17.4441	0.06841	17.3757
90	3959.05	99.65	9.12003	0.06978	9.05025					90	3924.96	98.79	17.4446	0.07121	17.3734
91	3922.21	98.72	8.27864	0.0709	8.20774					91	3923.05	98.74	17.4369	0.07295	17.364
92	3784.62	95.26	9.22437	0.07055	9.15382					92	3929.69	98.91	17.3975	0.00091	17.3966
93	3905.87	98.31	7.55866	0.07605	7.48261					93	3943.91	99.27	17.441	0.00016	17.4408
94	3936.27	99.08	9.7592	0.07146	9.68774					94	3868.24	97.36	17.255	0.06832	17.1866
95	3969.47	99.91	8.23362	0.06872	8.1649					95	3915.63	98.56	17.4093	0.07122	17.3381
96	3941.33	99.2	6.97875	0.00029	6.97846					96	3940.63	99.18	17.4317	0.07108	17.3606
97	3962.67	99.74	9.94022	0.03703	9.90319					97	3866.51	97.32	17.4364	0.07225	17.3641
98	3966.88	99.85	9.37676	0.06954	9.30722					98	3955.25	99.55	17.4352	0.07333	17.3619
99	3887.24	97.84	7.34039	0.07083	7.26956					99	3859.84	97.15	17.4387	0.07293	17.3657
100	3872.2	97.46	10.7409	0.072	10.6689					100	3960.39	99.68	17.4323	0.00026	17.432
101	3940.96	99.19	7.2723	0.0036	7.2687					101	3898.57	98.13	17.4158	0.07004	17.3458
102	3892.2	97.97	10.8671	0.07259	10.7945					102	3929.07	98.89	17.424	0.0007	17.4233
103	3951.16	99.45	4.27559	0.07106	4.20453					103	3970.95	99.95	17.4245	0.00082	17.4237
104	3941.14	99.2	5.24797	0.07392	5.17405					104	3970.73	99.94	17.3801	0.00077	17.3793
105	3944.33	99.28	10.7592	0.07104	10.6882					105	3873.61	97.5	17.4318	0.0732	17.3586
106	3952.25	99.48	5.35927	0.06866	5.29061					106	3891.18	97.94	17.4294	0.0684	17.361
107	3971.98	99.97	7.83806	0.07213	7.76593					107	3965.78	99.82	17.3487	0.00427	17.3445
108	3962.98	99.75	8.57042	0.07002	8.5004					108	3850.13	96.91	17.4372	0.07177	17.3654
109	3953.37	99.51	9.79402	0.07199	9.72203					109	3844.4	96.76	17.4027	0.06955	17.3332
110	3934.24	99.02	7.07721	0.06671	7.0105					110	3949.23	99.4	17.3904	0.00354	17.3868
111	3937.45	99.1	9.30977	0.03983	9.26994					111	3734.68	94	17.4355	0.06983	17.3657
112	3967.84	99.87	8.91647	0.04201	8.87446					112	3782.41	95.2	17.4395	0.0699	17.3696
113	3962.77	99.74	5.71255	0.0731	5.63945					113	3899.41	98.15	17.4388	0.07173	17.3671
114	3965.26	99.8	8.56439	0.06939	8.495					114	3845.16	96.78	17.257	0.07132	17.1857
115	3953.89	99.52	6.73492	0.05488	6.68004					115	3947.7	99.36	17.3769	0.07481	17.3021
116	3896.69	98.08	8.46719	0.07516	8.39203					116	3906.75	98.33	17.3633	0.00321	17.3601
117	3963.19	99.75	10.4378	0.07198	10.3658					117	3921.31	98.7	17.4064	0.07473	17.3316
118	3950.34	99.43	9.29006	0.06676	9.2233					118	3840.15	96.66	17.4262	0.07005	17.3562
119	3936.57	99.08	9.08781	0.07086	9.01695					119	3918.8	98.64	17.3074	0.0762	17.2312
120	3962.01	99.72	4.41494	0.01903	4.39591					120	3937.89	99.12	17.2328	0.07001	17.1628
121	3927.5	98.85	7.59746	0.06702	7.53044					121	3784.31	95.25	17.4435	0.07215	17.3713
122	3970.41	99.93	10.4689	0.02092	10.448					122	3925.84	98.81	17.3642	0.06814	17.2961
123	3933.72	99.01	6.33066	0.0709	6.25976					123	3962.66	99.74	17.3453	0.0009	17.3444
124	3939.21	99.15	9.85748	0.06812	9.78936					124	3969.58	99.91	17.4172	0.0751	17.3421
125	3945.32	99.3	9.07751	0.0697	9.00781					125	3945.1	99.3	17.4153	0.07046	17.3448
126	3959.57	99.66	9.84405	0.07315	9.7709					126	3933.89	99.02	17.4249	0.00026	17.4246
127	3921.31	98.7	5.17239	0.07134	5.10105					127	3880.66	97.68	17.3998	0.07013	17.3297
128	3912.53	98.48	9.39058	0.07205	9.31853					128	3714.52	93.49	17.3319	0.07121	17.2606
129	3968.36	99.88	8.38322	0.0151	8.36812					129	3948.37	99.38	17.4156	0.06787	17.3478
130	3953.37	99.51	10.1022	0.07475	10.0275					130	3789.98	95.39	17.3759	0.07097	17.305
131	3971.7	99.97	9.84377	0.01885	9.82492					131	3953.37	99.51	17.4076	0.07198	17.3356
132	3866.51	97.32	8.02632	0.07227	7.95405					132	3963.19	99.75	17.4326	0.00122	17.4314
133	3957.5	99.61	8.98522	0.07061	8.91461					133	3972.35	99.98	17.423	0.00126	17.4217
134	3896.89	98.08	9.25342	0.07143	9.18199					134	3917.7	98.61	17.4444	0.07264	17.3718
135	3968.36	99.88	8.563	0.0178	8.5452					135	3950.52	99.43	17.4216	0.06978	17.3518
136	3962.16	99.73	9.58363	0.06954	9.51409					136	3915.11	98.54	17.4456	0.07223	17.3733
137	3966.21	99.83	6.23281	0.0713	6.16151					137	3967.33	99.86	17.4328	0.07273	17.3601
138	3940.38	99.18	9.71752	0.07003	9.64749					138	3940.96	99.19	17.4302	0.07054	17.3597
139	3830.32	96.41	6.32502	0.06792	6.2571					139	3970.43	99.94	17.3486	0.00837	17.3403
140	3946.2	99.33	8.55022	0.07288	8.47734					140	3936.25	99.07	17.1829	0.07018	17.1128
141	3958.57	99.64	8.83173	0.0694	8.76233					141	3877.46	97.59	17.4456	0.07268	17.3729
142	3965.7	99.82	9.18411	0.07157	9.11254					142	3949.75	99.41	17.4373	0.07471	17.3626
143	3920.27	98.67	9.57659	0.07047	9.50612					143	3823.21	96.23	17.4393	0.06734	17.372
144	3958.8	99.64	9.48988	0.07274	9.41714					144	3948.44	99.38	17.4041	0.001	17.4031
145	3947.68	99.36	9.45606	0.07178	9.38428					145	3937.57	99.11	17.2964	0.07435	17.2221
146	3934.24	99.02	7.2053	0.06911	7.13619					146	3937.77	99.11	17.4108	0.00073	17.4101
147	3970.09	99.93	8.20211	0.03742	8.16469					147	3962.16	99.73	17.4348	0.0036	17.4312
148	3924.93	98.79	10.0903	0.07202	10.0183					148	3903.66	98.25	17.4176	0.07051	17.3471
149	3966.53	99.84	8.4946	0.07282	8.42178					149	3931.63	98.96	17.4322	0.00082	17.4314
150	3718.02	93.58	10.4138	0.00113	10.4127					150	3965.26	99.8	17.192	0.00016	17.1919
151	3887.19	97.84	10.3036	0.06931	10.2343					151	3962.66	99.74	17.2534	6e-05	17.2533
152	3828.26	96.36	10.4939	0.07383	10.4201					152	3943.55	99.26	17.4321	0.07125	17.3609
153	3967.33	99.86	9.33747	0.06797	9.2695					153	3792.07	95.45	17.4344	0.06865	17.3658
154	3955.04	99.55	10.4079	0.07539	10.3325					154	3942.11	99.22	17.3253	0.07244	17.2529
155	3955.44	99.56	8.05261	0.04152	8.01109					155	3952.96	99.5	17.3902	0.00993	17.3802
156	3963.95	99.77	9.18551	0.03884	9.14667					156	3961.04	99.7	17.4271	0.00015	17.4269
157	3921.41	98.7	9.06474	0.06619	8.99855					157	3964.92	99.8	17.4339	0.00016	17.4337
158	3953.37	99.51	9.25839	0.07501	9.18338					158	3969.91	99.92	17.3711	0.07326	17.2979
159	3952.85	99.49	7.68091	0.07093	7.60998					159	3930.34	98.93	17.3225	0.0002	17.3223
160	3774.49	95	10.5119	0.07103	10.4409					160	3969.12	99.9	17.3813	0.0005	17.3808
161	3967.18	99.85	7.78334	0.03029	7.75305					161	3938.65	99.14	17.3917	0.06917	17.3225
162	3815.33	96.03	8.94021	0.06885	8.87136					162	3967.33	99.86	17.4411	0.0003	17.4408
163	3964.62	99.79	8.8696	0.07216	8.79744					163	3893.4	98	17.4318	0.07183	17.36
164	3951.02	99.45	10.7396	0.06102	10.6786					164	3972.03	99.98	17.402	0.00116	17.4008
165	3799.75	95.64	10.6663	0.07241	10.5939					165	3972.03	99.98	17.4107	0.00134	17.4094
166	3950.27	99.43	9.66276	0.06963	9.59313					166	3966.24	99.83	17.4212	0.07495	17.3463
167	3834.46	96.51	10.0074	0.07171	9.93568					167	3952.33	99.48	17.4455	0.06926	17.3762
168	3795.79	95.54	9.15614	0.07137	9.08477					168	3949.82	99.42	17.4157	0.07467	17.341
169	3950.96	99.44	8.56777	0.06938	8.49839					169	3931.14	98.95	17.1	0.03834	17.0616
170	3946.65	99.34	7.89091	0.07191	7.819					170	3970.73	99.94	17.4349	0.00046	17.4344
171	3912.56	98.48	10.4368	0.03725	10.3995					171	3933.72	99.01	17.3988	0.06991	17.3289
172	3963.95	99.77	9.35411	0.07172	9.28239					172	3955.44	99.56	17.4246	0.07317	17.3514
173	3913.56	98.5	7.71906	0.06831	7.65075					173	3869.61	97.4	17.3295	0.06938	17.2601
174	3876.93	97.58	10.047	0.0719	9.97511					174	3902.19	98.22	17.4358	0.07628	17.3595
175	3953.89	99.52	8.29147	0.07333	8.21814					175	3904	98.26	17.425	0.07067	17.3543
176	3954.4	99.53	8.18608	0.07092	8.11516					176	3964.27	99.78	17.3916	0	17.3916
177	3962.66	99.74	9.10852	0.07297	9.03555					177	3972.5	99.99	17.3053	7e-05	17.3053
178	3949.64	99.41	8.30591	0.07308	8.23283					178	3954.9	99.54	17.4271	0.00079	17.4263
179	3943.55	99.26	9.56261	0.07039	9.49222					179	3954.92	99.54	17.4343	0.07123	17.3631
180	3921.85	98.71	10.5848	0.06505	10.5198					180	3961.94	99.72	17.4276	0.07219	17.3554
181	3895.98	98.06	9.22263	0.07048	9.15215					181	3965.26	99.8	17.4427	0.06895	17.3738
182	3518.51	88.56	8.40229	0.0725	8.32979					182	3920.34	98.67	17.4205	0.07016	17.3503
183	3912.89	98.49	8.87887	0.0006	8.87827					183	3949.23	99.4	17.4298	0.07221	17.3576
184	3963.77	99.77	10.1082	0.07301	10.0352					184	3972.35	99.98	17.3994	1e-05	17.3994
185	3823.57	96.24	9.44668	0.07407	9.37261					185	3931.14	98.95	17.3982	0.00041	17.3978
186	3934.76	99.04	7.34321	0.06883	7.27438					186	3808.61	95.86	17.4342	0.06708	17.3672
187	3972.35	99.98	9.45754	0.07365	9.38389					187	3871.27	97.44	17.4095	0.06701	17.3425
188	3964.22	99.78	6.90905	0.07098	6.83807					188	3957.51	99.61	17.4321	0.07113	17.361
189	3922.24	98.72	10.039	0.07125	9.96777					189	3900.25	98.17	17.4342	0.07122	17.363
190	3845.83	96.8	9.47289	0.07264	9.40025					190	3951.76	99.47	17.3893	0.06795	17.3213
191	3964.59	99.79	9.62886	0.07197	9.55689					191	3951.99	99.47	17.4239	0.00068	17.4232
192	3949.75	99.41	9.90286	0.07378	9.82908					192	3962.67	99.74	17.4259	0.07005	17.3558
193	3947.16	99.35	9.06641	0.07008	8.99633					193	3818.95	96.12	17.4393	0.06637	17.3729
194	3946.65	99.34	8.14645	0.03391	8.11254					194	3952.85	99.49	17.4194	0.06758	17.3518
195	3970.09	99.93	8.14725	0.04203	8.10522					195	3876.34	97.57	17.4129	0.07103	17.3419
196	3894.95	98.04	8.68346	0.06959	8.61387					196	3971.85	99.97	17.4223	0.07389	17.3484
197	3886.68	97.83	8.18334	0.06893	8.11441					197	3959.42	99.66	17.3784	0.002	17.3764
198	3971.85	99.97	5.13299	0.07183	5.06116					198	3905.8	98.31	17.4387	0.06816	17.3705
199	3870.13	97.41	9.61922	0.07291	9.54631					199	3883.92	97.76	17.4264	0.07092	17.3555
200	3971.46	99.96	8.29288	0.07241	8.22047					200	3964.92	99.8	17.415	7e-05	17.4149

## Sheet: 05_EACO_Seeds(111)
Fast Converegnce Exp							Fast Converegnce Exp			Slow Converegnce Exp							Slow Converegnce Exp
#	CBLF	Quality	Taumax	Taumin	DeltaTauminmax		Global Optimal Solution =	3973.01		#	CBLF	Quality	Taumax	Taumin	DeltaTauminmax		Global Optimal Solution =	3973
1	3961.36	99.71	6.60973	0.01317	6.59656		Minimum Optimal Solution=	3723.26		1	3961.36	99.71	17.3858	0.0001	17.3857		Minimum Optimal Solution =	3702.02
2	3921.01	98.69	8.96248	0.07276	8.88972		Mean of Optimal Solution =	3919.61		2	3731.2	93.91	17.2612	0.06931	17.1919		Mean of Optimal Solution =	3923.67
3	3941.48	99.21	9.62032	0.01582	9.6045		Median of Optimal Solution =	3919.61		3	3874.85	97.53	17.4095	0.07138	17.3382		Median of Optimal Solution =	3923.67
4	3972.35	99.98	8.62822	0.01782	8.6104		Solution Standrad Deviation=	52.5919		4	3900	98.16	17.4443	0.07046	17.3738		Solution Standrad Deviation =	49.0284
5	3968.36	99.88	9.62771	0.06856	9.55915		Average Price =	16.91		5	3971.52	99.96	17.4244	0.0725	17.3519		Average Price =	63.515
6	3858.39	97.12	10.7192	0.0748	10.6444		Relability =	10		6	3921.76	98.71	17.2605	0.07062	17.1899		Relability =	8.5
7	3967.84	99.87	8.81838	0.07559	8.74279		Normalized Price =	169.1		7	3970.43	99.94	17.432	0.00078	17.4312		Normalized Price =	747.235
8	3908.48	98.38	7.86138	0.07237	7.78901		Average Solution Quality =	98.6559		8	3962.16	99.73	17.4182	0.00037	17.4178		Average Solution Quality =	98.7581
9	3777.99	95.09	10.4027	0.07112	10.3316		Average FDC =	-86.3933		9	3933.72	99.01	17.4002	0.06966	17.3306		Average FDC =	-30.3954
10	3860.35	97.16	10.1236	0.07501	10.0486		Correlation Coefficent =	-0.82144		10	3937.77	99.11	17.3102	0.01466	17.2956		Correlation Coefficent =	-0.87769
11	3971.85	99.97	10.1793	0.06964	10.1097		Solution Robustness =	74.5288		11	3967.85	99.87	17.3589	0.07039	17.2885		Solution Robustness =	80.0285
12	3908.18	98.37	8.08457	0.06808	8.01649		Performance Rate =	0.0059137		12	3840.94	96.68	17.2483	0.0705	17.1778		Performance Rate =	0.0013383
13	3966.05	99.82	8.01791	0.07253	7.94538		Average Elapsed Time =	0.77819		13	3968.8	99.89	17.4459	0.00033	17.4456		Average Elapsed Time =	2.931
14	3723.26	93.71	9.10322	0.07183	9.03139					14	3950.27	99.43	17.4015	0.07365	17.3278
15	3943.08	99.25	4.62742	0.06991	4.55751					15	3948.44	99.38	17.3911	0.00027	17.3908
16	3958.54	99.64	9.85404	0.06858	9.78546					16	3947.16	99.35	17.4205	0.00096	17.4196
17	3962.67	99.74	8.89715	0.05305	8.8441					17	3912.01	98.46	17.4069	0.06921	17.3377
18	3935.51	99.06	8.80831	0.07337	8.73494					18	3944.06	99.27	17.4334	0.0714	17.362
19	3859.8	97.15	9.12848	0.07123	9.05725					19	3959.57	99.66	17.3443	0.00094	17.3434
20	3823.09	96.23	10.2724	0.07013	10.2022					20	3931.95	98.97	17.4288	0.00015	17.4286
21	3856.17	97.06	9.2943	0.06673	9.22757					21	3940.96	99.19	17.4336	0.07078	17.3628
22	3942.41	99.23	8.75447	0.07426	8.68021					22	3925.93	98.82	17.4336	0.07295	17.3606
23	3852.78	96.97	8.32916	0.0006	8.32856					23	3964.09	99.78	17.2735	0.07157	17.2019
24	3880.99	97.68	10.4342	0.07065	10.3636					24	3812.87	95.97	17.4042	0.07098	17.3332
25	3970.43	99.94	9.67904	0.0709	9.60814					25	3922.86	98.74	17.4338	0.07455	17.3592
26	3917.7	98.61	8.84967	0.07288	8.77679					26	3964.74	99.79	17.36	0.07132	17.2886
27	3932.16	98.97	10.8458	0.07223	10.7735					27	3952.66	99.49	17.4026	0.072	17.3306
28	3856.3	97.06	10.6302	0.06852	10.5617					28	3702.02	93.18	17.3915	0.0687	17.3228
29	3917.26	98.6	9.24986	0.06858	9.18128					29	3915.63	98.56	17.3629	0.06762	17.2953
30	3968.18	99.88	8.79973	0.077	8.72273					30	3945.53	99.31	17.4138	0.00032	17.4135
31	3862.97	97.23	10.0686	0.07197	9.9966					31	3929.59	98.91	17.3977	0.07123	17.3264
32	3954.4	99.53	9.26143	0.07353	9.1879					32	3924.79	98.79	17.3978	0.07089	17.327
33	3747.36	94.32	8.74561	0.06718	8.67843					33	3971.85	99.97	17.1974	0.07484	17.1226
34	3967.33	99.86	9.94962	0.0764	9.87322					34	3947.79	99.37	17.3896	0.00375	17.3859
35	3929.19	98.9	8.75401	0.07095	8.68306					35	3922.92	98.74	17.2598	0.06984	17.19
36	3945.61	99.31	8.79612	0.01665	8.77947					36	3915.94	98.56	17.4395	0.07009	17.3694
37	3961.36	99.71	10.0054	0.07379	9.93164					37	3963.71	99.77	17.4388	0.07192	17.3669
38	3953.28	99.5	8.12948	0.07243	8.05705					38	3887.45	97.85	17.4281	0.07153	17.3566
39	3969.39	99.91	8.71772	0.07519	8.64253					39	3932.6	98.98	17.4333	0.00017	17.4331
40	3966.86	99.85	10.0625	0.07035	9.99213					40	3916.07	98.57	17.4475	0.07206	17.3755
41	3933.72	99.01	8.32682	0.07256	8.25426					41	3880.47	97.67	17.4386	0.07183	17.3668
42	3856.08	97.06	7.98002	0.0725	7.90752					42	3919.25	98.65	17.4383	0.07322	17.3651
43	3910.95	98.44	8.89869	0.02393	8.87476					43	3899.6	98.15	17.4226	0.0691	17.3535
44	3950.27	99.43	8.13084	0.07153	8.05931					44	3933.2	99	17.4292	0.06901	17.3602
45	3963.77	99.77	8.39167	0.07319	8.31848					45	3951.34	99.45	17.4167	0.00079	17.4159
46	3903.96	98.26	6.90791	0.07141	6.8365					46	3953.61	99.51	17.4223	0.00045	17.4218
47	3781.73	95.19	10.8852	0.06967	10.8155					47	3920.32	98.67	17.4335	0.00046	17.433
48	3967.32	99.86	5.68003	0.0724	5.60763					48	3870.65	97.42	17.4211	0.06668	17.3544
49	3877.03	97.58	10.4147	0.06945	10.3453					49	3760.01	94.64	17.4334	0.06826	17.3651
50	3969.91	99.92	10.1027	0.05873	10.0439					50	3903.32	98.25	17.3942	0.07061	17.3236
51	3970.41	99.93	8.70434	0.01614	8.6882					51	3960.19	99.68	17.2177	0.069	17.1487
52	3856.17	97.06	6.87694	0.07296	6.80398					52	3903.74	98.26	17.4302	0.07142	17.3588
53	3947.14	99.35	8.11181	0.04434	8.06747					53	3962.67	99.74	17.4324	0.07407	17.3583
54	3916.66	98.58	7.40191	0.07337	7.32854					54	3871.14	97.44	17.4415	0.07228	17.3692
55	3971.06	99.95	8.50844	0.07227	8.43617					55	3962.67	99.74	17.3268	0.07272	17.2541
56	3937.34	99.1	10.7251	0.07089	10.6542					56	3963.71	99.77	17.4053	0.00019	17.4051
57	3884.09	97.76	9.23721	0.07229	9.16492					57	3968.36	99.88	17.4229	0.07141	17.3515
58	3956.84	99.59	9.51847	0.01436	9.50411					58	3963.19	99.75	17.4295	0.00037	17.4291
59	3946.82	99.34	8.63987	0.07292	8.56695					59	3957.16	99.6	17.4299	0.00095	17.429
60	3946.65	99.34	5.34973	0.07369	5.27604					60	3876.34	97.57	17.4413	0.06847	17.3728
61	3934.86	99.04	7.13511	0.07205	7.06306					61	3968.88	99.9	17.4175	0.07097	17.3466
62	3913.04	98.49	9.71515	0.07312	9.64203					62	3966.86	99.85	17.4175	0.0016	17.4159
63	3886.11	97.81	9.90049	0.07391	9.82658					63	3930.75	98.94	17.4419	0.0705	17.3714
64	3967.53	99.86	9.33131	0.06946	9.26185					64	3921.83	98.71	17.4301	0.07148	17.3586
65	3968.88	99.9	8.75692	0.06874	8.68818					65	3972.03	99.98	17.4177	0.00122	17.4165
66	3956.31	99.58	8.88677	0.07279	8.81398					66	3937.45	99.1	17.4232	0.00038	17.4228
67	3932.23	98.97	9.097	0.0722	9.0248					67	3919.86	98.66	17.4329	0.07361	17.3593
68	3815.47	96.03	10.2752	0.07183	10.2034					68	3912.53	98.48	17.3941	0.07143	17.3226
69	3962.16	99.73	8.76894	0.0472	8.72174					69	3831.4	96.44	17.4335	0.07246	17.361
70	3887.19	97.84	10.119	0.0726	10.0464					70	3952.6	99.49	17.4443	0.07556	17.3687
71	3889.25	97.89	10.3044	0.07233	10.2321					71	3959.05	99.65	17.3937	0.074	17.3197
72	3824.75	96.27	10.9676	0.07098	10.8967					72	3917.7	98.61	17.4132	0.07185	17.3413
73	3945.61	99.31	10.0169	0.06069	9.95626					73	3972.5	99.99	17.4226	0.00059	17.422
74	3967.99	99.87	8.79342	0.0694	8.72402					74	3919.2	98.65	17.4151	0.06952	17.3456
75	3924.54	98.78	7.16556	0.06892	7.09664					75	3859.41	97.14	17.4398	0.06966	17.3702
76	3924.2	98.77	6.85579	0.07195	6.78384					76	3968.47	99.89	17.4207	0.00013	17.4206
77	3930.1	98.92	9.97219	0.06841	9.90378					77	3963.19	99.75	17.4367	0.00016	17.4365
78	3962.16	99.73	4.75139	0.07285	4.67854					78	3967.84	99.87	17.3636	0.00011	17.3635
79	3765.9	94.79	10.7635	0.07203	10.6915					79	3927.87	98.86	17.4357	0.06987	17.3659
80	3958.8	99.64	9.29676	0.07177	9.22499					80	3943.61	99.26	17.3844	0.07111	17.3133
81	3954.9	99.54	7.26692	0.06926	7.19766					81	3952.75	99.49	17.4304	0.06747	17.3629
82	3858.96	97.13	8.87977	0.068	8.81177					82	3958.89	99.64	17.4275	0.07309	17.3544
83	3923.89	98.76	8.23812	0.07247	8.16565					83	3937.24	99.1	17.4174	0.07233	17.3451
84	3930.46	98.93	8.69882	0.07266	8.62616					84	3952.33	99.48	17.4279	0.06902	17.3589
85	3972.67	99.99	10.1308	0.01982	10.111					85	3927	98.84	17.4423	0.07257	17.3697
86	3890.59	97.93	7.5685	0.07196	7.49654					86	3908.33	98.37	17.4243	0.07132	17.3529
87	3947.05	99.35	9.26005	0.07422	9.18583					87	3971.98	99.97	17.307	0.00027	17.3067
88	3902.65	98.23	6.34911	0.07112	6.27799					88	3906.32	98.32	17.4383	0.07163	17.3667
89	3881.34	97.69	10.5679	0.06809	10.4998					89	3905.99	98.31	17.4218	0.06647	17.3554
90	3925.97	98.82	7.81413	0.0703	7.74383					90	3852.97	96.98	17.4455	0.07097	17.3746
91	3877.46	97.6	9.93202	0.0689	9.86312					91	3957.6	99.61	17.4256	0.07158	17.354
92	3916.07	98.57	8.93328	0.06743	8.86585					92	3958.02	99.62	17.4373	0.06528	17.372
93	3966.86	99.85	9.58911	0.01717	9.57194					93	3972.67	99.99	17.3947	0.00011	17.3946
94	3951.3	99.45	9.37998	0.07316	9.30682					94	3950.81	99.44	17.3133	0.07487	17.2385
95	3899.28	98.14	6.2223	0.06978	6.15252					95	3966.86	99.85	17.4374	0.00032	17.4371
96	3944.56	99.28	8.57929	0.0402	8.53909					96	3889.62	97.9	17.4366	0.00029	17.4363
97	3912.01	98.46	8.75275	0.014	8.73875					97	3906.42	98.32	17.4376	1e-05	17.4375
98	3963.19	99.75	7.26162	0.02666	7.23496					98	3929.3	98.9	17.4171	0.0728	17.3443
99	3968.36	99.88	7.90828	0.01488	7.8934					99	3956.77	99.59	17.4038	0.07166	17.3321
100	3892.88	97.98	5.06658	0.07172	4.99486					100	3964.94	99.8	17.4088	0.07351	17.3353
101	3958.54	99.64	7.95403	0.0724	7.88163					101	3943.61	99.26	17.4239	0.06764	17.3562
102	3846.55	96.82	8.92385	0.06867	8.85518					102	3921.83	98.71	17.4128	0.07499	17.3378
103	3969.91	99.92	8.44456	0.07343	8.37113					103	3946.13	99.32	17.3409	0.06909	17.2718
104	3866	97.31	8.84505	0.07303	8.77202					104	3939.93	99.17	17.3984	0.0674	17.331
105	3967.99	99.87	9.03386	0.0749	8.95896					105	3947.05	99.35	17.3769	0.07502	17.3019
106	3930.11	98.92	9.80494	0.07382	9.73112					106	3965.78	99.82	17.412	0.00015	17.4119
107	3963.62	99.76	9.54224	0.01263	9.52961					107	3833.94	96.5	17.4037	0.07158	17.3321
108	3885.12	97.79	10.0942	0.07255	10.0217					108	3926.48	98.83	17.3923	0.07269	17.3196
109	3972.35	99.98	9.30719	0.01652	9.29067					109	3958.54	99.64	17.4199	0.07012	17.3498
110	3959.05	99.65	8.65045	0.06903	8.58142					110	3880.03	97.66	17.4152	0.07097	17.3443
111	3934.68	99.04	6.97118	0.06839	6.90279					111	3927	98.84	17.4331	0.06953	17.3636
112	3972.35	99.98	9.29697	0.06743	9.22954					112	3829.81	96.4	17.4422	0.06949	17.3727
113	3951.99	99.47	8.66275	0.07235	8.5904					113	3857.21	97.09	17.3702	0.00429	17.3659
114	3954.6	99.54	9.24495	0.07317	9.17178					114	3904.81	98.28	17.4394	0.0003	17.4391
115	3928.03	98.87	7.79176	0.06852	7.72324					115	3931.58	98.96	17.4319	0.06916	17.3627
116	3856.33	97.06	7.5675	0.06592	7.50158					116	3970.41	99.93	17.4163	0.00156	17.4147
117	3896.52	98.07	10.1322	0.07283	10.0594					117	3967.33	99.86	17.4121	0.00021	17.4119
118	3939.41	99.15	10.4407	0.07627	10.3644					118	3924.42	98.78	17.4349	0.07065	17.3643
119	3953.89	99.52	9.30331	0.01072	9.29259					119	3972.5	99.99	17.3678	0.00099	17.3668
120	3970.41	99.93	8.96969	0.06797	8.90172					120	3962.77	99.74	17.4373	0.06803	17.3693
121	3962.16	99.73	9.07917	0.07001	9.00916					121	3959.05	99.65	17.1593	0.04029	17.119
122	3933.39	99	9.82863	0.0701	9.75853					122	3860.56	97.17	17.4173	0.07174	17.3456
123	3958.45	99.63	9.97121	0.07089	9.90032					123	3843.14	96.73	17.4273	0.06929	17.358
124	3928.55	98.88	8.16224	0.07139	8.09085					124	3924.42	98.78	17.4466	0.07406	17.3725
125	3934.98	99.04	10.1881	0.07254	10.1156					125	3898.26	98.12	17.4324	0.07252	17.3599
126	3865.48	97.29	7.93064	0.06852	7.86212					126	3973	100	17.4106	8e-05	17.4105
127	3939.06	99.15	10.4471	0.02411	10.423					127	3944	99.27	17.4368	0.07243	17.3644
128	3935.83	99.06	9.91673	0.01521	9.90152					128	3866.51	97.32	17.1288	0.07121	17.0575
129	3912.53	98.48	9.57014	0.06985	9.50029					129	3903.22	98.24	17.3389	0.07113	17.2677
130	3928.38	98.88	8.07312	0.0709	8.00222					130	3939.93	99.17	17.406	0.07276	17.3332
131	3901.99	98.21	5.77358	0.0689	5.70468					131	3806.03	95.8	17.323	0.06956	17.2535
132	3921.01	98.69	9.92738	0.06968	9.8577					132	3958.13	99.63	17.4345	0.00036	17.4341
133	3964.74	99.79	8.87684	0.07016	8.80668					133	3874.54	97.52	17.4354	0.068	17.3674
134	3971.7	99.97	7.40962	0.07575	7.33387					134	3963.97	99.77	17.4298	0.07311	17.3567
135	3962.27	99.73	7.56105	0.07117	7.48988					135	3904.43	98.27	17.3531	0.07401	17.2791
136	3965.73	99.82	5.29991	0.07213	5.22778					136	3965.26	99.8	17.3378	0.06816	17.2697
137	3953.61	99.51	10.3598	0.00113	10.3587					137	3878.95	97.63	17.4152	0.0001	17.4151
138	3909.01	98.39	6.6436	0.06885	6.57475					138	3767.35	94.82	17.444	0.06898	17.375
139	3961.68	99.71	10.0134	0.07178	9.94166					139	3933.69	99.01	17.4181	0.0712	17.3469
140	3966.21	99.83	6.23991	0.01705	6.22286					140	3899.68	98.15	17.4283	0.07265	17.3557
141	3961.16	99.7	6.65085	0.07277	6.57808					141	3972.67	99.99	17.4209	0.001	17.4199
142	3933.48	99.01	10.5539	0.07123	10.4827					142	3962.67	99.74	17.4342	0.07244	17.3618
143	3970.41	99.93	7.249	0.0434	7.2056					143	3834.8	96.52	17.4478	0.07369	17.3741
144	3862.38	97.22	8.79474	0.07278	8.72196					144	3857.81	97.1	17.3717	0.06709	17.3046
145	3813.51	95.99	8.78238	0.07391	8.70847					145	3955.44	99.56	17.396	0.07214	17.3239
146	3913.04	98.49	8.99045	0.03336	8.95709					146	3963.19	99.75	17.4022	0.07173	17.3304
147	3888.77	97.88	7.90851	0.07172	7.83679					147	3903.14	98.24	17.2068	0.07351	17.1333
148	3964.92	99.8	10.095	0.00082	10.0942					148	3970.41	99.93	17.303	6e-05	17.3029
149	3803.44	95.73	10.1548	0.07249	10.0823					149	3968.32	99.88	17.4228	0.07473	17.348
150	3821.53	96.19	9.29838	0.06968	9.2287					150	3862.15	97.21	17.4322	0.00016	17.4321
151	3918.21	98.62	8.52947	0.07607	8.4534					151	3969.39	99.91	17.3683	0.07074	17.2975
152	3964.74	99.79	9.72184	0.06829	9.65355					152	3825.65	96.29	17.4131	0.06962	17.3435
153	3854.47	97.02	10.2497	0.07239	10.1773					153	3915.86	98.56	17.2806	0.07077	17.2098
154	3831.71	96.44	10.4474	0.07225	10.3752					154	3858.76	97.12	17.4332	0.07289	17.3604
155	3902.7	98.23	9.20845	0.07279	9.13566					155	3932.28	98.97	17.407	0.00083	17.4062
156	3904.25	98.27	7.47622	0.06685	7.40937					156	3954.92	99.54	17.3294	0.06927	17.2601
157	3937.86	99.12	7.86796	0.06991	7.79805					157	3896.69	98.08	17.3499	0.06954	17.2804
158	3962.98	99.75	7.21278	0.00489	7.20789					158	3787.41	95.33	17.3976	0.07346	17.3242
159	3935.19	99.05	9.64927	0.07161	9.57766					159	3903.83	98.26	17.4179	0.07169	17.3462
160	3778.78	95.11	8.67463	0.06954	8.60509					160	3948.9	99.39	17.4257	0.06977	17.3559
161	3873.44	97.49	10.2889	0.07319	10.2157					161	3965.27	99.81	17.433	0.07222	17.3608
162	3839.21	96.63	10.1256	0.0199	10.1057					162	3833.94	96.5	17.4238	0.07417	17.3496
163	3924.29	98.77	10.153	0.06955	10.0834					163	3971.46	99.96	17.3639	0.06738	17.2965
164	3942.76	99.24	8.76974	0.07194	8.6978					164	3967.35	99.86	17.4185	0.06784	17.3507
165	3946.13	99.32	8.09589	0.07238	8.02351					165	3937.34	99.1	17.4211	0.06644	17.3547
166	3896.55	98.08	9.27172	0.06956	9.20216					166	3851.89	96.95	17.423	0.07351	17.3495
167	3935.79	99.06	8.92708	0.07145	8.85563					167	3915.32	98.55	17.4296	0.07378	17.3559
168	3947.17	99.35	7.58617	0.07264	7.51353					168	3951.34	99.45	17.398	0.00026	17.3977
169	3918.73	98.63	9.19656	0.06919	9.12737					169	3928.22	98.87	17.4241	0.06962	17.3545
170	3952.33	99.48	9.60256	0.05906	9.5435					170	3966.05	99.82	17.4282	0.06765	17.3606
171	3932.92	98.99	10.0905	0.07377	10.0168					171	3840.31	96.66	17.4261	0.06849	17.3576
172	3902.88	98.23	8.21427	0.07145	8.14282					172	3961.36	99.71	17.3295	0.00272	17.3268
173	3845.83	96.8	10.3987	0.07112	10.3276					173	3970.41	99.93	17.4357	1e-05	17.4357
174	3883.48	97.75	9.18058	0.06706	9.11352					174	3972.67	99.99	17.3854	0.00425	17.3812
175	3964.94	99.8	8.19626	0.06945	8.12681					175	3858.76	97.12	17.4387	0.07201	17.3667
176	3953.37	99.51	9.21985	0.06833	9.15152					176	3834.95	96.53	17.3852	0.07016	17.315
177	3973.01	100	8.06782	0.06852	7.9993					177	3946.65	99.34	17.2875	0.01788	17.2696
178	3973	100	9.65897	0.04169	9.61728					178	3966.53	99.84	17.3957	0.00019	17.3955
179	3973	100	10.1759	0.00113	10.1748					179	3968.15	99.88	17.4067	0.00195	17.4048
180	3897.02	98.09	8.49556	0.06933	8.42623					180	3931.65	98.96	17.4215	0.07326	17.3483
181	3961.04	99.7	5.95884	0.0219	5.93694					181	3865.48	97.29	17.433	0.07278	17.3602
182	3962.66	99.74	4.27607	0.06773	4.20834					182	3955.04	99.55	17.4078	0.07401	17.3338
183	3922.38	98.73	8.87211	0.07096	8.80115					183	3964.41	99.78	17.4411	0.07186	17.3693
184	3944.06	99.27	8.96861	0.07523	8.89338					184	3944.06	99.27	17.433	0.06987	17.3631
185	3881.52	97.7	8.64044	0.06985	8.57059					185	3963.19	99.75	17.4366	0.00049	17.4361
186	3915.86	98.56	8.92394	0.06586	8.85808					186	3901.58	98.2	17.3942	0.00647	17.3878
187	3902.7	98.23	10.3919	0.07049	10.3215					187	3940.44	99.18	17.4436	0.0727	17.3709
188	3957.51	99.61	8.22772	0.07493	8.15279					188	3917	98.59	17.4247	0.07275	17.352
189	3967.84	99.87	9.46733	0.0388	9.42853					189	3972.03	99.98	17.4202	0.00097	17.4192
190	3894.91	98.03	10.1059	0.068	10.0379					190	3895.09	98.04	17.4423	0.07141	17.3709
191	3972.03	99.98	8.93006	0.03064	8.89942					191	3955.44	99.56	17.4343	0.0698	17.3645
192	3934.68	99.04	3.42438	0.06859	3.35579					192	3949.73	99.41	17.4356	0.00018	17.4354
193	3970.09	99.93	7.77573	0.07125	7.70448					193	3948.26	99.38	17.4385	0.07099	17.3675
194	3967.84	99.87	10.1512	0.04195	10.1093					194	3938.35	99.13	17.422	0.07338	17.3487
195	3969.58	99.91	7.85767	0.07188	7.78579					195	3889.26	97.89	17.4166	0.0722	17.3444
196	3756.31	94.55	10.1493	0.07057	10.0787					196	3885.09	97.79	17.3591	0.00032	17.3588
197	3853.93	97	6.84276	0.07363	6.76913					197	3917.09	98.59	17.2639	0.0092	17.2547
198	3745.64	94.28	9.75633	0.07071	9.68562					198	3966.88	99.85	17.4409	0.06999	17.3709
199	3865.35	97.29	9.85034	0.07149	9.77885					199	3921.83	98.71	17.4209	0.07167	17.3492
200	3935.27	99.05	7.87706	0.02226	7.8548					200	3967.85	99.87	17.1283	0.07213	17.0561

## Sheet: 06_EACO_Seeds(200)
Fast Converegnce Exp							Fast Converegnce Exp			Slow Converegnce Exp							Slow Converegnce Exp
#	CBLF	Quality	Taumax	Taumin	DeltaTauminmax		Global Optimal Solution =	3973.01		#	CBLF	Quality	Taumax	Taumin	DeltaTauminmax		Global Optimal Solution =	3973
1	3948.72	99.39	9.87182	0.07017	9.80165		Minimum Optimal Solution =	3612.4		1	3948.72	99.39	17.4319	0.07017	17.3618		Minimum Optimal Solution =	3688.84
2	3965.26	99.8	8.31937	0.07312	8.24625		Mean of Optimal Solution =	3921.58		2	3954.9	99.54	17.387	0.00025	17.3867		Mean of Optimal Solution =	3921.29
3	3951.81	99.47	7.9314	0.06815	7.86325		Median of Optimal Solution =	3921.58		3	3972.35	99.98	17.4152	0.00301	17.4122		Median of Optimal Solution =	3921.29
4	3965.78	99.82	6.33216	0.06849	6.26367		Solution Standrad Deviation =	56.2806		4	3966.86	99.85	17.3931	0.00058	17.3925		Solution Standrad Deviation =	55.6903
5	3760.68	94.66	10.65	0.00102	10.649		Average Price =	16.87		5	3941.24	99.2	17.2944	0.07172	17.2227		Average Price =	63.495
6	3962.5	99.74	9.40482	0.06971	9.33511		Relability =	8		6	3896.72	98.08	17.3949	0.06792	17.327		Relability =	8.5
7	3910.64	98.43	6.38056	0.07408	6.30648		Normalized Price =	210.875		7	3939.41	99.15	17.438	0.07087	17.3671		Normalized Price =	747
8	3963.42	99.76	8.77263	0.07169	8.70094		Average Solution Quality =	98.7056		8	3968.88	99.9	17.4336	0.06799	17.3656		Average Solution Quality =	98.6982
9	3852.1	96.96	8.50476	0.06941	8.43535		Average FDC =	-85.1545		9	3957.16	99.6	17.4008	0.00068	17.4001		Average FDC =	-32.0636
10	3841.18	96.68	9.87796	0.06823	9.80973		Correlation Coefficent =	-0.81722		10	3868.28	97.36	17.3832	0.07378	17.3094		Correlation Coefficent =	-0.89293
11	3876.34	97.57	9.43034	0.06872	9.36162		Solution Robustness =	69.6791		11	3967.18	99.85	17.4234	0.00086	17.4226		Solution Robustness =	70.4124
12	3964.74	99.79	9.68372	0.01981	9.66391		Performance Rate =	0.0047421		12	3968.36	99.88	17.4364	0.00033	17.4361		Performance Rate =	0.0013387
13	3969.44	99.91	7.48336	0.07111	7.41225		Average Elapsed Time =	0.78101		13	3971.06	99.95	17.3621	0.00261	17.3595		Average Elapsed Time =	2.9916
14	3878.95	97.63	9.33161	0.06983	9.26178					14	3960.33	99.68	17.3929	0.06578	17.3272
15	3952.33	99.48	9.4636	0.05948	9.40412					15	3943.03	99.25	17.2331	0.07077	17.1623
16	3958.89	99.64	8.27722	0.07576	8.20146					16	3747.71	94.33	17.4353	0.07047	17.3648
17	3972.49	99.99	8.55129	0.07299	8.4783					17	3938.09	99.12	17.4419	1e-05	17.4419
18	3904.33	98.27	10.3847	0.07339	10.3114					18	3939.93	99.17	17.4352	0.07305	17.3622
19	3967.99	99.87	7.61691	0.07247	7.54444					19	3896.02	98.06	17.4044	0.07099	17.3334
20	3945.1	99.3	9.16117	0.07301	9.08816					20	3902.87	98.23	17.4326	0.00066	17.432
21	3937.34	99.1	7.44939	0.07132	7.37807					21	3949.2	99.4	17.4374	0.07286	17.3646
22	3871.87	97.45	7.81171	0.06967	7.74204					22	3942.3	99.23	17.4402	1e-05	17.4402
23	3970.09	99.93	5.83303	0.03961	5.79342					23	3817.84	96.09	17.4381	0.07272	17.3653
24	3882.83	97.73	9.50782	0.05923	9.44859					24	3915.24	98.55	17.3785	0.06835	17.3102
25	3904.5	98.28	8.75611	0.07165	8.68446					25	3964.41	99.78	17.3849	0.07356	17.3114
26	3972.5	99.99	10.3327	0.07558	10.2571					26	3894.76	98.03	17.3708	0.06896	17.3018
27	3927.78	98.86	9.16886	0.0697	9.09916					27	3872.28	97.46	17.415	0.07076	17.3443
28	3936.94	99.09	8.21483	0.07367	8.14116					28	3873.75	97.5	17.4462	0.07617	17.37
29	3925.45	98.8	5.43613	0.06709	5.36904					29	3862.47	97.22	17.4408	0.00015	17.4406
30	3949.82	99.42	7.61394	0.0673	7.54664					30	3890.26	97.92	17.4371	0.06906	17.368
31	3939.71	99.16	8.75623	0.07229	8.68394					31	3961.12	99.7	17.3915	0.00136	17.3901
32	3968.88	99.9	9.26968	0.05236	9.21732					32	3961.64	99.71	17.4361	0.07428	17.3619
33	3907.5	98.35	7.7958	0.07591	7.71989					33	3912.38	98.47	17.436	0.06981	17.3662
34	3935.45	99.05	7.60347	0.06714	7.53633					34	3961.36	99.71	17.4306	0.00074	17.4298
35	3826.74	96.32	9.5567	0.06964	9.48706					35	3964.22	99.78	17.4413	0.07077	17.3706
36	3971.98	99.97	9.67973	0.00102	9.67871					36	3841.05	96.68	17.4372	0.0698	17.3674
37	3967.18	99.85	8.62152	0.06904	8.55248					37	3927.52	98.85	17.2178	0.06875	17.149
38	3964.62	99.79	9.36804	0.06946	9.29858					38	3956.19	99.58	17.4229	0.00043	17.4225
39	3748.67	94.35	8.95367	0.06691	8.88676					39	3940.95	99.19	17.4228	0.07123	17.3516
40	3963.62	99.76	6.15599	0.02732	6.12867					40	3827.08	96.33	17.4052	0.06919	17.336
41	3968.36	99.88	9.49448	0.0424	9.45208					41	3902.89	98.24	17.4356	0.07337	17.3622
42	3951.43	99.46	6.98858	0.07258	6.916					42	3960.53	99.69	17.3591	0.07253	17.2866
43	3922.27	98.72	8.29417	0.06879	8.22538					43	3941.6	99.21	17.3867	0.07229	17.3144
44	3916.79	98.58	9.22169	0.07241	9.14928					44	3965.26	99.8	17.1813	0.03656	17.1447
45	3768.28	94.85	9.70887	0.06889	9.63998					45	3968.8	99.89	17.419	0.00235	17.4166
46	3931.14	98.95	8.34664	0.07209	8.27455					46	3896.76	98.08	17.4423	0.07274	17.3695
47	3824.66	96.27	9.39852	0.06911	9.32941					47	3875.2	97.54	17.3718	0.0717	17.3001
48	3956.47	99.58	9.44179	0.07395	9.36784					48	3897.53	98.1	17.4292	0.0732	17.356
49	3916.72	98.58	9.76934	0.07501	9.69433					49	3972.67	99.99	17.385	0.00554	17.3795
50	3945.61	99.31	10.2262	0.07024	10.156					50	3968.8	99.89	17.3881	0.00709	17.381
51	3947.14	99.35	7.75406	0.03006	7.724					51	3964.59	99.79	17.4114	7e-05	17.4113
52	3697.5	93.07	10.9768	0.06671	10.9101					52	3752.77	94.46	17.4175	0.07315	17.3443
53	3939.93	99.17	9.48544	0.07055	9.41489					53	3970.73	99.94	17.3928	0.00059	17.3922
54	3885.74	97.8	5.50507	0.06799	5.43708					54	3971.98	99.97	17.4276	0.00075	17.4269
55	3908.91	98.39	9.47941	0.06959	9.40982					55	3865.67	97.3	17.4356	0.07063	17.365
56	3967.84	99.87	9.56589	0.07309	9.4928					56	3895.55	98.05	17.4314	0.07086	17.3606
57	3949.75	99.41	9.02393	0.01581	9.00812					57	3903.19	98.24	17.3871	0.00104	17.3861
58	3967.5	99.86	9.38537	0.01862	9.36675					58	3688.84	92.85	17.4405	0.0671	17.3734
59	3903.28	98.25	9.02813	0.07291	8.95522					59	3933.25	99	17.3922	0.00206	17.3901
60	3971.85	99.97	8.3594	0.07209	8.28731					60	3937.06	99.1	17.4309	0.0742	17.3567
61	3954.72	99.54	9.97717	0.0683	9.90887					61	3897.53	98.1	17.4299	0.07215	17.3578
62	3902.5	98.23	8.96983	0.07432	8.89551					62	3957.95	99.62	17.4335	0.07153	17.3619
63	3954.02	99.52	9.22522	0.07085	9.15437					63	3880.21	97.66	17.4324	0.06722	17.3652
64	3922.86	98.74	10.371	0.0738	10.2972					64	3944.88	99.29	17.4075	0.00083	17.4066
65	3964.92	99.8	9.39498	0.04049	9.35449					65	3965.78	99.82	17.42	0.00016	17.4198
66	3920.64	98.68	9.47868	0.01926	9.45942					66	3934.98	99.04	17.4421	0.07157	17.3705
67	3945.2	99.3	9.82437	0.02032	9.80405					67	3927.52	98.86	17.3988	0.06845	17.3303
68	3894.91	98.03	9.893	0.07195	9.82105					68	3876.06	97.56	17.3733	0.06935	17.3039
69	3879.57	97.65	10.8698	0.07196	10.7979					69	3960.07	99.67	17.4396	0.00045	17.4392
70	3962.77	99.74	7.68352	0.06811	7.61541					70	3972.17	99.98	17.4303	0.07237	17.3579
71	3923.67	98.76	5.28341	0.06855	5.21486					71	3831.31	96.43	17.4435	0.07003	17.3735
72	3902.87	98.23	9.29231	0.06758	9.22473					72	3968.36	99.88	17.4149	0.00281	17.4121
73	3929.59	98.91	9.35218	0.07387	9.27831					73	3962.67	99.74	17.4393	0.00016	17.4392
74	3958.54	99.64	9.0243	0.07161	8.95269					74	3894.79	98.03	17.418	0.00013	17.4179
75	3864.33	97.26	9.32263	0.07479	9.24784					75	3959.57	99.66	17.4193	0.07349	17.3458
76	3837.56	96.59	9.81172	0.06655	9.74517					76	3920.15	98.67	17.397	0.07172	17.3253
77	3973.01	100	6.7968	0.06691	6.72989					77	3970.09	99.93	17.3996	0.00023	17.3994
78	3943.09	99.25	9.55022	0.06926	9.48096					78	3937.24	99.1	17.3642	0.06313	17.301
79	3950.19	99.43	9.5253	0.07065	9.45465					79	3937.77	99.11	17.3799	0.0046	17.3753
80	3969.14	99.9	7.73835	0.07192	7.66643					80	3955.57	99.56	17.4051	0.07207	17.333
81	3865.47	97.29	8.1412	0.07133	8.06987					81	3930.62	98.93	17.3565	0.07275	17.2837
82	3968.88	99.9	8.50709	0.07276	8.43433					82	3806.68	95.81	17.441	0.07147	17.3695
83	3953.31	99.5	9.55392	0.07092	9.483					83	3898.57	98.13	17.3087	0.00018	17.3085
84	3946.2	99.33	9.24695	0.06834	9.17861					84	3929.69	98.91	17.4404	0.00031	17.4401
85	3932.89	98.99	10.1271	0.06867	10.0584					85	3940.44	99.18	17.4039	0.07139	17.3325
86	3903.74	98.26	7.05838	0.07039	6.98799					86	3931.14	98.95	17.1759	0.06884	17.1071
87	3900.93	98.19	10.7329	0.02354	10.7093					87	3938.89	99.14	17.3727	0.00049	17.3723
88	3972.67	99.99	9.30427	0.04626	9.25801					88	3945.02	99.3	17.4129	0.0704	17.3425
89	3891.02	97.94	8.97535	0.07427	8.90108					89	3950.38	99.43	17.4316	0.00053	17.4311
90	3959.42	99.66	5.67921	0.06387	5.61534					90	3964.22	99.78	17.4405	0.072	17.3685
91	3852.94	96.98	7.71013	0.07016	7.63997					91	3960.61	99.69	17.382	0.07251	17.3095
92	3939.8	99.16	6.98482	0.07039	6.91443					92	3966.86	99.85	17.4084	0.00051	17.4079
93	3963.19	99.75	8.23919	0.01126	8.22793					93	3945.1	99.3	17.3938	0.00029	17.3935
94	3947.16	99.35	9.97174	0.07615	9.89559					94	3946.82	99.34	17.2871	0.00777	17.2794
95	3847.9	96.85	9.71085	0.06799	9.64286					95	3937.86	99.12	17.2247	0.00034	17.2244
96	3945.61	99.31	9.1904	0.07063	9.11977					96	3967.18	99.85	17.2688	0.00013	17.2687
97	3933.72	99.01	10.0086	0.07054	9.93802					97	3967.18	99.85	17.4148	0.00025	17.4146
98	3734.51	94	9.30358	0.07014	9.23344					98	3916.59	98.58	17.432	0.07286	17.3592
99	3965.78	99.82	8.42815	0.03373	8.39442					99	3782.24	95.2	17.4314	0.07188	17.3595
100	3899.6	98.15	8.7313	0.07349	8.65781					100	3933.89	99.02	17.3052	9e-05	17.3051
101	3961.04	99.7	9.45669	0.0729	9.38379					101	3829.59	96.39	17.4377	0.07001	17.3677
102	3931.95	98.97	10.7558	0.03669	10.7191					102	3859.21	97.14	17.436	0.07073	17.3652
103	3950.78	99.44	10.648	0.07245	10.5756					103	3956.99	99.6	17.4157	0.06861	17.3471
104	3939.39	99.15	7.18076	0.07198	7.10878					104	3958.13	99.63	17.4325	0.00089	17.4317
105	3862.47	97.22	10.1924	0.01927	10.1731					105	3972.67	99.99	17.3696	0.0004	17.3692
106	3923.67	98.76	9.10015	0.07141	9.02874					106	3862.89	97.23	17.4303	0.0683	17.362
107	3940.44	99.18	7.3706	0.07484	7.29576					107	3891.72	97.95	17.4331	0.07145	17.3616
108	3957.65	99.61	9.87448	0.07205	9.80243					108	3827.18	96.33	17.4265	0.06694	17.3596
109	3876.1	97.56	8.86382	0.07036	8.79346					109	3831.99	96.45	17.4448	0.06913	17.3757
110	3912.06	98.47	7.14114	0.07082	7.07032					110	3892.36	97.97	17.4281	0.07087	17.3573
111	3955.95	99.57	9.27754	0.07085	9.20669					111	3953.86	99.52	17.391	0.07036	17.3207
112	3962.66	99.74	9.54621	0.06969	9.47652					112	3965.27	99.81	17.3878	0.07384	17.314
113	3944.82	99.29	7.75492	0.07213	7.68279					113	3971.85	99.97	17.2338	0.07137	17.1624
114	3968.18	99.88	9.3062	0.06899	9.23721					114	3888.71	97.88	17.3672	0.06972	17.2975
115	3840.15	96.66	10.1022	0.07005	10.0321					115	3967.84	99.87	17.4283	0.07502	17.3533
116	3914.53	98.53	10.4036	0.07025	10.3334					116	3966.86	99.85	17.4124	0.00063	17.4118
117	3967.32	99.86	8.35168	0.06955	8.28213					117	3966.86	99.85	17.4084	0.0019	17.4065
118	3962.47	99.73	9.3817	0.07347	9.30823					118	3936.8	99.09	17.4073	0.00206	17.4052
119	3855.25	97.04	10.3501	0.07166	10.2785					119	3871.76	97.45	17.4215	0.06753	17.3539
120	3947.29	99.35	8.7589	0.07046	8.68844					120	3902.87	98.23	17.4288	0.00127	17.4275
121	3875.78	97.55	9.92317	0.0685	9.85467					121	3956.63	99.59	17.415	0.07136	17.3436
122	3956.63	99.59	9.20375	0.07302	9.13073					122	3966.21	99.83	17.386	0.00017	17.3858
123	3968.88	99.9	7.97457	0.07113	7.90344					123	3895.74	98.06	17.443	0.07407	17.3689
124	3958.54	99.64	9.67584	0.06711	9.60873					124	3911.49	98.45	16.9622	0.0688	16.8934
125	3911.41	98.45	4.64423	0.07196	4.57227					125	3803.96	95.74	17.4377	0.07053	17.3672
126	3921.83	98.71	8.25493	0.07086	8.18407					126	3851.88	96.95	17.4052	0.07226	17.333
127	3971.98	99.97	9.87413	0.07361	9.80052					127	3967.18	99.85	17.3929	0.00251	17.3904
128	3964.74	99.79	9.26034	0.0122	9.24814					128	3972.5	99.99	17.4353	0.00061	17.4347
129	3957.16	99.6	9.13313	0.01714	9.11599					129	3912.53	98.48	17.2253	0.06993	17.1554
130	3914.84	98.54	4.98804	0.07012	4.91792					130	3921.83	98.71	17.4179	0.07215	17.3457
131	3765.86	94.79	10.2844	0.06861	10.2158					131	3946.13	99.32	17.4187	0.07059	17.3482
132	3941.28	99.2	9.89424	0.07415	9.82009					132	3904.65	98.28	17.4303	0.0707	17.3596
133	3961.04	99.7	10.3438	0.04022	10.3036					133	3901.67	98.2	17.4271	0.07069	17.3564
134	3957.48	99.61	9.31902	0.02566	9.29336					134	3972.03	99.98	17.3142	0.01361	17.3005
135	3916.66	98.58	8.47197	0.07206	8.39991					135	3923	98.74	17.4278	0.07086	17.3569
136	3948.58	99.39	9.32847	0.068	9.26047					136	3893.14	97.99	17.4389	0.0705	17.3684
137	3848.58	96.87	9.68268	0.06876	9.61392					137	3944.06	99.27	17.4105	0.07008	17.3404
138	3871.17	97.44	9.05889	0.06894	8.98995					138	3966.03	99.82	17.4457	0.07208	17.3736
139	3893.4	98	9.76283	0.07427	9.68856					139	3822.45	96.21	17.294	0.07195	17.222
140	3959.05	99.65	6.36458	0.03026	6.33432					140	3961.07	99.7	17.4197	0.06786	17.3518
141	3845.32	96.79	6.69438	0.06922	6.62516					141	3968.88	99.9	17.2269	0.07052	17.1564
142	3809.13	95.88	10.6323	0.072	10.5603					142	3964.92	99.8	17.4095	0.00024	17.4092
143	3927.52	98.85	5.835	0.07182	5.76318					143	3915.03	98.54	17.4365	0.06747	17.369
144	3957.3	99.6	9.76004	0.07309	9.68695					144	3884.57	97.77	17.4167	0.06965	17.347
145	3931.45	98.95	9.16854	0.07394	9.0946					145	3951.43	99.46	17.4092	0.06842	17.3408
146	3959.42	99.66	9.71442	0.07143	9.64299					146	3872.2	97.46	17.4483	0.07307	17.3753
147	3891.05	97.94	9.97895	0.07186	9.90709					147	3947.56	99.36	17.352	0.0698	17.2822
148	3971.98	99.97	9.94289	0.02169	9.9212					148	3933.72	99.01	17.4125	0.07061	17.3419
149	3919.76	98.66	7.46423	0.06966	7.39457					149	3877.89	97.61	17.4281	0.07168	17.3564
150	3958.02	99.62	9.13507	0.07017	9.0649					150	3913.68	98.51	17.3722	0.07194	17.3002
151	3846.11	96.81	10.3939	0.07333	10.3206					151	3935.83	99.06	17.3925	0.00054	17.3919
152	3916.14	98.57	8.67294	0.0715	8.60144					152	3953.37	99.51	17.4386	0.06578	17.3728
153	3949.23	99.4	4.23723	0.07056	4.16667					153	3815.85	96.04	17.4371	0.06976	17.3674
154	3941.33	99.2	10.7595	0.04032	10.7192					154	3724.86	93.75	17.4424	0.06759	17.3748
155	3924.2	98.77	6.90722	0.03765	6.86957					155	3971.38	99.96	17.4202	0.00176	17.4184
156	3949.82	99.42	9.21026	0.07344	9.13682					156	3886.68	97.83	17.3848	0.07437	17.3105
157	3889.41	97.9	9.48507	0.07565	9.40942					157	3962.33	99.73	17.3931	0.00146	17.3916
158	3962.67	99.74	9.55632	0.07148	9.48484					158	3964.22	99.78	17.3997	0.0716	17.3281
159	3945.61	99.31	10.3024	0.07035	10.232					159	3948.72	99.39	17.4407	0.07349	17.3673
160	3957.92	99.62	10.1049	0.07219	10.0327					160	3943.55	99.26	17.3884	0.00021	17.3882
161	3886.93	97.83	8.94473	0.07172	8.87301					161	3969.91	99.92	17.4434	0.06567	17.3777
162	3967.84	99.87	6.10502	0.07328	6.03174					162	3970.73	99.94	17.4222	0.00143	17.4207
163	3970.41	99.93	9.12922	0.05363	9.07559					163	3962.45	99.73	17.3694	0.07242	17.2969
164	3810.16	95.9	8.3852	0.07317	8.31203					164	3959.42	99.66	17.4189	0.00102	17.4179
165	3739.85	94.13	10.6934	0.06916	10.6242					165	3973	100	17.2151	0.01392	17.2011
166	3950.7	99.44	7.30879	0.01332	7.29547					166	3844.28	96.76	17.4371	0.07297	17.3641
167	3956.13	99.58	8.93081	0.07209	8.85872					167	3888.65	97.88	17.4389	0.00029	17.4386
168	3612.4	90.92	8.19314	0.07137	8.12177					168	3884.61	97.77	17.2542	0.0726	17.1816
169	3970.41	99.93	9.42237	0.07424	9.34813					169	3895.1	98.04	17.4379	0.07129	17.3666
170	3968.36	99.88	7.80718	0.0721	7.73508					170	3952.85	99.49	17.4378	0.07319	17.3646
171	3972.35	99.98	6.64777	0.06866	6.57911					171	3937.75	99.11	17.3969	0.07179	17.3251
172	3919.25	98.65	9.57634	0.07207	9.50427					172	3709.86	93.38	17.4335	0.07369	17.3598
173	3960.72	99.69	8.16839	0.02583	8.14256					173	3963.19	99.75	17.3876	0.07097	17.3166
174	3824.45	96.26	9.44679	0.07031	9.37648					174	3964.74	99.79	17.3838	0.07023	17.3135
175	3925.17	98.8	8.79306	0.07362	8.71944					175	3958.54	99.64	17.3891	0.06943	17.3197
176	3935.63	99.06	8.71768	0.06879	8.64889					176	3953.37	99.51	17.428	0.07139	17.3566
177	3946.64	99.34	7.89214	0.06999	7.82215					177	3932.58	98.98	17.3291	0.07237	17.2567
178	3964.74	99.79	9.35808	0.07372	9.28436					178	3963.19	99.75	17.3942	0.00024	17.3939
179	3970.09	99.93	9.8378	0.00102	9.83678					179	3929.05	98.89	17.3666	0.0018	17.3648
180	3961.12	99.7	7.7191	0.0732	7.6459					180	3711.14	93.41	17.4149	0.06923	17.3456
181	3918.73	98.63	5.93894	0.06636	5.87258					181	3960.21	99.68	17.3254	0.07187	17.2536
182	3970.09	99.93	7.43025	0.02893	7.40132					182	3909.14	98.39	17.4433	0.06916	17.3741
183	3925.81	98.81	10.4332	0.02307	10.4101					183	3962.01	99.72	17.4295	0.00016	17.4294
184	3914.92	98.54	7.14692	0.06848	7.07844					184	3951.67	99.46	17.4088	0.0004	17.4084
185	3922.05	98.72	7.86991	0.07214	7.79777					185	3904.6	98.28	17.3332	0.07098	17.2623
186	3915.16	98.54	8.9993	0.07226	8.92704					186	3868.88	97.38	17.357	0.06853	17.2884
187	3952.46	99.48	8.0517	0.07048	7.98122					187	3954.07	99.52	17.4283	0.06968	17.3586
188	3943.38	99.25	9.79861	0.07511	9.7235					188	3906.32	98.32	17.4174	0.00084	17.4166
189	3965.78	99.82	8.16483	0.06975	8.09508					189	3885.09	97.79	17.4145	0.06765	17.3468
190	3871.68	97.45	9.69848	0.07337	9.62511					190	3964.41	99.78	17.4337	0.07053	17.3632
191	3950.78	99.44	8.74089	0.06745	8.67344					191	3957.51	99.61	17.3937	0.07083	17.3229
192	3927.52	98.86	9.59589	0.06574	9.53015					192	3944.88	99.29	17.4243	0.00043	17.4239
193	3959.57	99.66	9.00051	0.05352	8.94699					193	3948.88	99.39	17.4259	0.07124	17.3547
194	3867.11	97.33	9.97337	0.06892	9.90445					194	3912.01	98.46	17.43	0.07328	17.3567
195	3876.85	97.58	10.6776	0.0676	10.61					195	3969.76	99.92	17.374	0.00049	17.3735
196	3933.72	99.01	10.7141	0.06821	10.6458					196	3897.51	98.1	17.4342	0.07168	17.3625
197	3946.02	99.32	9.78191	0.06767	9.71424					197	3970.09	99.93	17.381	0.00092	17.3801
198	3967.32	99.86	7.56622	0.0704	7.49582					198	3964.74	99.79	17.4261	0.06641	17.3597
199	3850.66	96.92	8.82427	0.07004	8.75423					199	3797.24	95.58	17.4287	0.07133	17.3573
200	3924.94	98.79	6.95151	0.07269	6.87882					200	3964.74	99.79	17.4219	0.07719	17.3447

## Sheet: 07_EACO_Seeds(167)
Fast Converegnce Exp							Fast Converegnce Exp			Slow Converegnce Exp							Slow Converegnce Exp
1	3937.34	99.1	3.13838	0.01962	3.11876		Global Optimal Solution =	3973		#	CBLF	Quality	Taumax	Taumin	DeltaTauminmax		Global Optimal Solution =	3973
1	3972.03	99.98	9.14462	0.06165	9.08297		Minimum Optimal Solution =	3656.61		1	3972.03	99.98	17.4279	0.00048	17.4275		Minimum Optimal Solution =	3644.66
2	3897.02	98.09	9.15378	0.07575	9.07803		Mean of Optimal Solution =	3910.67		2	3971.06	99.95	17.4309	1e-05	17.4308		Mean of Optimal Solution =	3924.25
3	3939	99.14	9.8701	0.07516	9.79494		Median of Optimal Solution=	3910.67		3	3968.88	99.9	17.3809	0.07073	17.3102		Median of Optimal Solution =	3924.25
4	3966.68	99.84	9.66313	0.07421	9.58892		Solution Standrad Deviation =	68.1742		4	3968.88	99.9	17.4239	0.00047	17.4235		Solution Standrad Deviation =	56.3539
5	3965.26	99.8	9.93553	0.07136	9.86417		Average Price =	17.045		5	3952.33	99.48	17.3305	0.07092	17.2596		Average Price =	64.545
6	3757.18	94.57	10.667	0.07274	10.5943		Relability =	8		6	3847.07	96.83	17.4231	0.07244	17.3506		Relability =	12
7	3788.18	95.35	4.95807	0.06878	4.88929		Normalized Price =	213.062		7	3808.37	95.86	17.3671	0.07224	17.2949		Normalized Price =	537.875
8	3687.77	92.82	10.6253	0.06753	10.5578		Average Solution Quality =	98.431		8	3685.07	92.75	17.4399	0.07063	17.3693		Average Solution Quality =	98.7727
9	3972.35	99.98	6.01425	0.02682	5.98743		Average FDC =	-86.9134		9	3965.89	99.82	17.4259	0.00014	17.4258		Average FDC =	-29.9066
10	3948.88	99.39	8.18299	0.06789	8.1151		Correlation Coefficent =	-1		10	3964.22	99.78	17.4031	0.06293	17.3402		Correlation Coefficent =	-1
11	3929.16	98.9	6.36469	0.06787	6.29682		Solution Robustness =	57.3629		11	3881.01	97.68	17.4179	0.07099	17.3469		Solution Robustness =	69.6357
12	3918.21	98.62	5.73217	0.07306	5.65911		Performance Rate =	0.0046935		12	3644.66	91.74	17.2911	7e-05	17.2911		Performance Rate =	0.0018592
13	3972.03	99.98	7.41073	0.07162	7.33911		Average Elapsed Time =	0.78653		13	3768.58	94.85	17.4376	0.06765	17.3699		Average Elapsed Time =	2.963
14	3918.73	98.63	8.39729	0.07161	8.32568					14	3934.76	99.04	17.4234	0.07075	17.3526
15	3891.57	97.95	9.08285	0.0734	9.00945					15	3869.69	97.4	17.4265	0.07232	17.3542
16	3959.05	99.65	8.12063	0.07071	8.04992					16	3894.62	98.03	17.1674	0.07278	17.0946
17	3746.54	94.3	8.27225	0.07189	8.20036					17	3961.83	99.72	17.4284	0.07065	17.3577
18	3967.82	99.87	6.72991	0.01455	6.71536					18	3970.41	99.93	17.4288	0.00108	17.4277
19	3972.5	99.99	9.52355	0.0224	9.50115					19	3961.64	99.71	17.2987	0.01377	17.2849
20	3927.52	98.85	8.77464	0.0743	8.70034					20	3906.34	98.32	17.4316	0.07012	17.3615
21	3909.7	98.41	7.85232	0.07123	7.78109					21	3871.68	97.45	17.2781	0.07498	17.2031
22	3869.82	97.4	9.82252	0.07394	9.74858					22	3941.28	99.2	17.3934	0.07129	17.3221
23	3965.24	99.8	9.9305	0.05877	9.87173					23	3831.88	96.45	17.4392	0.07313	17.366
24	3762.25	94.7	9.24619	0.06911	9.17708					24	3971.98	99.97	17.3848	0.00108	17.3837
25	3947.16	99.35	8.64373	0.07184	8.57189					25	3889.78	97.91	17.4399	0.069	17.3709
26	3973	100	10.2957	0.01934	10.2763					26	3959.57	99.66	17.3406	0.00227	17.3384
27	3956.84	99.59	6.69755	0.0713	6.62625					27	3963.3	99.76	17.4474	0.00027	17.4472
28	3923.99	98.77	9.71498	0.07008	9.6449					28	3784.57	95.26	17.4291	0.06957	17.3595
29	3967.84	99.87	8.67857	0.05265	8.62592					29	3963.19	99.75	17.4156	1e-05	17.4156
30	3900.93	98.19	10.5002	0.03695	10.4633					30	3959.05	99.65	17.4355	0.07176	17.3637
31	3943.55	99.26	8.63472	0.07184	8.56288					31	3927.52	98.86	17.4031	0.07325	17.3298
32	3778.11	95.09	10.312	0.07018	10.2418					32	3965.24	99.8	17.323	0.00019	17.3228
33	3943.55	99.26	8.36799	0.07051	8.29748					33	3948.7	99.39	17.4329	0.07397	17.3589
34	3914.08	98.52	9.19911	0.07243	9.12668					34	3952.64	99.49	17.4344	0.00085	17.4336
35	3949.08	99.4	10.1761	0.05557	10.1205					35	3971.46	99.96	17.4296	0.00124	17.4284
36	3920.67	98.68	10.7878	0.07305	10.7148					36	3947.72	99.36	17.4286	0.07329	17.3553
37	3957.16	99.6	7.53303	0.07119	7.46184					37	3939.41	99.15	17.3916	0.06921	17.3224
38	3867.48	97.34	9.63061	0.07138	9.55923					38	3972.35	99.98	17.3121	0.00324	17.3089
39	3849.5	96.89	10.4085	0.07023	10.3383					39	3968.88	99.9	17.4177	0.07067	17.3471
40	3947.16	99.35	7.03509	0.07015	6.96494					40	3972.03	99.98	17.4301	0.00074	17.4294
41	3968.36	99.88	9.46971	0.03165	9.43806					41	3870.34	97.42	17.4349	0.07135	17.3635
42	3946.26	99.33	8.32278	0.07173	8.25105					42	3952.64	99.49	17.4332	0.00046	17.4327
43	3971.06	99.95	7.21609	0.07213	7.14396					43	3914.13	98.52	17.4329	0.07122	17.3617
44	3963.3	99.76	9.18244	0.05039	9.13205					44	3950.93	99.44	17.4068	0.06908	17.3377
45	3796.75	95.56	10.226	0.06645	10.1595					45	3961.04	99.7	17.4154	0.00182	17.4135
46	3958.02	99.62	9.32236	0.07404	9.24832					46	3967.84	99.87	17.4375	0.07238	17.3651
47	3968.36	99.88	9.23552	0.06997	9.16555					47	3815.14	96.03	17.3162	0.07094	17.2453
48	3963.71	99.77	9.6059	0.01576	9.59014					48	3967.84	99.87	17.4333	0.07651	17.3568
49	3949.41	99.41	9.00586	0.00992	8.99594					49	3906.32	98.32	17.4208	0.06833	17.3525
50	3952.96	99.5	10.0158	0.01997	9.99586					50	3705.36	93.26	17.4209	0.06785	17.3531
51	3966.53	99.84	7.78207	0.01313	7.76894					51	3864.75	97.28	17.3949	0.07154	17.3234
52	3905.08	98.29	9.82237	0.07391	9.74846					52	3924.86	98.79	17.3198	0.07148	17.2483
53	3900.61	98.18	6.3762	0.0691	6.3071					53	3970.73	99.94	17.4326	0.00029	17.4323
54	3900.97	98.19	7.42561	0.07257	7.35304					54	3968.36	99.88	17.3739	0.07404	17.2999
55	3940.44	99.18	4.7308	0.07063	4.66017					55	3956.63	99.59	17.3176	0.06921	17.2484
56	3967.2	99.85	9.02877	0.06927	8.9595					56	3892.88	97.98	17.4048	0.06892	17.3359
57	3837.13	96.58	6.10573	0.07063	6.0351					57	3926.47	98.83	17.3794	0.07108	17.3084
58	3799.66	95.64	9.90412	0.07193	9.83219					58	3946.26	99.33	17.4121	0.0734	17.3387
59	3945.61	99.31	6.96913	0.06934	6.89979					59	3964.22	99.78	17.2296	0.07248	17.1572
60	3954.69	99.54	8.66467	0.07273	8.59194					60	3971.98	99.97	17.3208	0.00025	17.3206
61	3943.59	99.26	9.83471	0.04131	9.7934					61	3868.58	97.37	17.4369	0.07035	17.3665
62	3825.15	96.28	9.11289	0.07066	9.04223					62	3973	100	17.4378	0.00114	17.4367
63	3894.95	98.04	9.05355	0.07197	8.98158					63	3902.7	98.23	17.1277	0.07496	17.0527
64	3970.95	99.95	5.69637	0.0718	5.62457					64	3893.14	97.99	17.2792	0.07013	17.2091
65	3901.06	98.19	9.5794	0.06761	9.51179					65	3951.82	99.47	17.391	0.07413	17.3168
66	3923.26	98.75	7.03856	0.0701	6.96846					66	3938.07	99.12	17.4252	0.07283	17.3524
67	3865.74	97.3	9.18664	0.07263	9.11401					67	3917.7	98.61	17.3433	0.06973	17.2736
68	3967.82	99.87	8.38148	0.06962	8.31186					68	3964.94	99.8	17.4351	0.07208	17.363
69	3948.53	99.38	7.75448	0.07131	7.68317					69	3933.2	99	17.3385	0.0699	17.2686
70	3745.26	94.27	10.2354	0.07152	10.1639					70	3943.59	99.26	17.4284	0.00114	17.4272
71	3955.55	99.56	7.82404	0.0703	7.75374					71	3900.89	98.18	17.4323	0.07302	17.3593
72	3837.05	96.58	9.17125	0.07558	9.09567					72	3942.51	99.23	17.3442	0.06937	17.2749
73	3963.42	99.76	8.34878	0.07022	8.27856					73	3972.5	99.99	17.378	0.00056	17.3775
74	3968.8	99.89	9.25334	0.06799	9.18535					74	3951.82	99.47	17.3556	0.07543	17.2801
75	3952.33	99.48	8.93685	0.05787	8.87898					75	3919.25	98.65	17.4262	0.07068	17.3555
76	3896.5	98.07	10.635	0.07388	10.5611					76	3970.09	99.93	17.4359	0.00066	17.4352
77	3955.44	99.56	8.52946	0.07044	8.45902					77	3904.25	98.27	17.2321	0.07041	17.1617
78	3971.46	99.96	8.19198	0.07528	8.1167					78	3912.84	98.49	17.4139	0.07103	17.3428
79	3948.72	99.39	9.53178	0.07258	9.4592					79	3933.72	99.01	17.1671	5e-05	17.1671
80	3937.86	99.12	8.64552	0.07171	8.57381					80	3952.85	99.49	17.4168	0.06882	17.348
81	3947.16	99.35	11.0674	0.02207	11.0453					81	3927.52	98.85	17.4306	0.07292	17.3576
82	3921.82	98.71	9.8094	0.07023	9.73917					82	3953.31	99.5	17.4249	0.07085	17.354
83	3946.13	99.32	9.2167	0.0708	9.1459					83	3889.04	97.89	17.4257	0.07261	17.3531
84	3965.26	99.8	10.4749	0.00126	10.4737					84	3932.1	98.97	17.431	0.07123	17.3598
85	3959.05	99.65	9.93403	0.07124	9.86279					85	3921.41	98.7	17.3684	0.07023	17.2981
86	3866	97.31	10.4097	0.06908	10.3406					86	3971.98	99.97	17.4288	1e-05	17.4287
87	3954.39	99.53	7.69862	0.07373	7.62489					87	3965.89	99.82	17.3301	0.01319	17.317
88	3945.32	99.3	8.88389	0.06892	8.81497					88	3937.34	99.1	17.4247	0.07224	17.3525
89	3954.9	99.54	7.25431	0.05449	7.19982					89	3943.91	99.27	17.3933	0.00125	17.3921
90	3733.93	93.98	10.084	0.07422	10.0098					90	3952.96	99.5	17.433	0.00033	17.4326
91	3920.32	98.67	9.54897	0.07243	9.47654					91	3957.48	99.61	17.3844	0.00342	17.381
92	3954.02	99.52	6.93939	0.0731	6.86629					92	3946.26	99.33	17.2852	0.06724	17.2179
93	3939.39	99.15	9.80461	0.04191	9.7627					93	3941.48	99.21	17.3941	0.0709	17.3232
94	3896.49	98.07	8.50252	0.07283	8.42969					94	3922.35	98.72	17.398	0.07028	17.3277
95	3902.7	98.23	9.83885	0.07188	9.76697					95	3867.56	97.35	17.1966	0.07023	17.1264
96	3866	97.31	6.63759	0.07182	6.56577					96	3950.27	99.43	17.3978	0.00388	17.394
97	3888.74	97.88	9.26767	0.06587	9.2018					97	3881.56	97.7	17.4381	0.06738	17.3707
98	3801.01	95.67	8.18182	0.07133	8.11049					98	3804.32	95.75	17.3984	0.06796	17.3304
99	3853.07	96.98	9.94648	0.06794	9.87854					99	3939.41	99.15	17.441	0.06984	17.3712
100	3927.52	98.85	8.62384	0.07274	8.5511					100	3926.9	98.84	17.4235	0.07259	17.3509
101	3970.09	99.93	8.28381	0.06933	8.21448					101	3931.65	98.96	17.2272	0.07117	17.156
102	3947.79	99.37	7.30475	0.07216	7.23259					102	3940.44	99.18	17.4341	0.00047	17.4337
103	3900.43	98.17	7.48938	0.06997	7.41941					103	3958.48	99.63	17.3793	0.0714	17.3079
104	3971.46	99.96	8.43739	0.00082	8.43657					104	3956.98	99.6	17.3688	0.06713	17.3016
105	3949.08	99.4	7.28388	0.02032	7.26356					105	3914.84	98.54	17.427	0.06858	17.3584
106	3962.15	99.73	6.33146	0.07126	6.2602					106	3943.55	99.26	17.3428	0.0037	17.3391
107	3970.41	99.93	9.44378	0.05712	9.38666					107	3829.41	96.39	17.4335	0.07291	17.3606
108	3953.37	99.51	10.0593	0.0036	10.0557					108	3967.85	99.87	17.2373	0.07292	17.1644
109	3925.12	98.79	8.24287	0.07184	8.17103					109	3964.94	99.8	17.3444	0.07249	17.2719
110	3800.18	95.65	10.3683	0.07034	10.298					110	3908.38	98.37	17.4029	0.06378	17.3391
111	3933.25	99	7.88547	0.06869	7.81678					111	3966.53	99.84	17.4389	0.00033	17.4386
112	3962.16	99.73	9.82765	0.07673	9.75092					112	3931.63	98.96	17.4473	0.00017	17.4472
113	3748.4	94.35	9.54498	0.07097	9.47401					113	3973	100	17.4324	0.00067	17.4318
114	3857.21	97.09	9.45592	0.06965	9.38627					114	3915.18	98.54	17.4341	0.07278	17.3613
115	3955.22	99.55	5.17574	0.0697	5.10604					115	3891.9	97.96	17.4161	0.0717	17.3444
116	3932.86	98.99	7.58562	0.07298	7.51264					116	3958.8	99.64	17.3888	0.06792	17.3209
117	3899.78	98.16	8.20366	0.07053	8.13313					117	3900.08	98.16	17.3973	0.07149	17.3259
118	3849.79	96.9	10.0945	0.07261	10.0219					118	3927.52	98.85	17.4232	0.07307	17.3501
119	3864.83	97.28	6.1422	0.06866	6.07354					119	3880.99	97.68	17.4462	0.07557	17.3706
120	3890.88	97.93	8.60341	0.07338	8.53003					120	3800.78	95.67	17.4264	0.07096	17.3554
121	3971.98	99.97	7.89266	0.07313	7.81953					121	3819.47	96.14	17.4423	0.06977	17.3725
122	3924.2	98.77	8.44615	0.0408	8.40535					122	3878.4	97.62	17.4044	0.07183	17.3325
123	3922.35	98.72	10.2721	0.05103	10.221					123	3959.89	99.67	17.4021	0.07361	17.3285
124	3949.23	99.4	10.1915	0.07202	10.1195					124	3860.16	97.16	17.4252	0.07029	17.3549
125	3931.65	98.96	9.32902	0.07048	9.25854					125	3912.66	98.48	17.4083	0.0715	17.3368
126	3939.93	99.17	10.1259	0.07263	10.0533					126	3950.27	99.43	17.4377	1e-05	17.4377
127	3952.13	99.47	8.75209	0.07238	8.67971					127	3943.03	99.25	17.4158	0.06683	17.349
128	3947.16	99.35	10.3184	0.07541	10.243					128	3923.9	98.76	17.4368	0.07017	17.3666
129	3725.58	93.77	10.0995	0.07145	10.028					129	3942.09	99.22	17.4316	0.07461	17.357
130	3944.7	99.29	7.56635	0.06827	7.49808					130	3949.23	99.4	17.4174	0.07422	17.3432
131	3912.9	98.49	9.78441	0.06934	9.71507					131	3846.87	96.83	17.4311	0.07277	17.3584
132	3750.18	94.39	5.725	0.06933	5.65567					132	3902.51	98.23	17.1657	0.07334	17.0924
133	3918.7	98.63	9.46625	0.00049	9.46576					133	3937.22	99.1	17.4288	0.0726	17.3562
134	3973	100	9.22932	0.06887	9.16045					134	3962.67	99.74	17.4359	0.00015	17.4357
135	3959.89	99.67	8.50125	0.07114	8.43011					135	3818.43	96.11	17.3125	0.06879	17.2437
136	3870.65	97.42	8.93955	0.0719	8.86765					136	3745.57	94.28	17.3569	0.07148	17.2854
137	3904.5	98.28	8.3912	0.07165	8.31955					137	3951.76	99.47	17.4176	0.07195	17.3456
138	3761.02	94.66	9.76207	0.07285	9.68922					138	3916.44	98.58	17.3508	0.00022	17.3506
139	3954.92	99.54	8.75237	0.06821	8.68416					139	3940.03	99.17	17.4253	0.00094	17.4244
140	3763.97	94.74	10.323	0.06627	10.2567					140	3962.67	99.74	17.3986	0.00021	17.3984
141	3962.01	99.72	8.9234	0.07043	8.85297					141	3929.76	98.91	17.4179	0.06752	17.3504
142	3902.87	98.23	7.51314	0.07015	7.44299					142	3923.9	98.76	17.4434	0.0693	17.3742
143	3947.88	99.37	9.10378	0.06791	9.03587					143	3773.34	94.97	17.4334	0.07087	17.3625
144	3968.36	99.88	8.29918	0.07105	8.22813					144	3802.94	95.72	17.4442	0.07226	17.372
145	3949.84	99.42	9.05784	0.07363	8.98421					145	3883.44	97.75	17.4283	0.06978	17.3585
146	3937.34	99.1	10.1826	0.07491	10.1077					146	3961.36	99.71	17.3544	0.00024	17.3542
147	3962.66	99.74	8.65176	0.07086	8.5809					147	3949.75	99.41	17.3811	0.07027	17.3109
148	3816.36	96.06	10.3999	0.06897	10.331					148	3939.41	99.15	17.4192	0.07386	17.3453
149	3932.92	98.99	7.80486	0.07238	7.73248					149	3918.21	98.62	17.4418	0.06981	17.372
150	3972.35	99.98	8.85753	0.06959	8.78794					150	3956.19	99.58	17.3693	0.00698	17.3624
151	3929.07	98.89	9.48391	0.05809	9.42582					151	3949.75	99.41	17.444	0.0771	17.3668
152	3972.17	99.98	5.55955	0.07326	5.48629					152	3965.78	99.82	17.4341	0.00038	17.4337
153	3927.38	98.85	6.726	0.06649	6.65951					153	3921.83	98.71	17.3645	0.07162	17.2929
154	3955.95	99.57	10.2936	0.00102	10.2926					154	3946.13	99.32	17.3722	0.07037	17.3019
155	3831.93	96.45	9.30726	0.06947	9.23779					155	3965.89	99.82	17.4407	0.00016	17.4405
156	3950.31	99.43	10.7636	0.07495	10.6887					156	3970.95	99.95	17.2764	0.07249	17.2039
157	3929.69	98.91	9.2785	0.034	9.2445					157	3939.92	99.17	17.4122	0.06892	17.3433
158	3914.13	98.52	10.5747	0.07122	10.5035					158	3861.02	97.18	17.4237	0.06897	17.3547
159	3941.53	99.21	10.274	0.07037	10.2037					159	3951.02	99.45	17.4316	0.00108	17.4305
160	3807	95.82	9.75922	0.06998	9.68924					160	3967.33	99.86	17.4377	1e-05	17.4377
161	3757.01	94.56	10.3117	0.06821	10.2435					161	3945.61	99.31	17.3941	0.07125	17.3228
162	3917.55	98.6	8.35127	0.07146	8.27981					162	3971.98	99.97	17.4292	0.00026	17.429
163	3961.04	99.7	9.42255	0.00102	9.42153					163	3966.03	99.82	17.4028	0.06722	17.3355
164	3761	94.66	8.96458	0.07185	8.89273					164	3916.14	98.57	17.4312	0.0729	17.3583
165	3952.96	99.5	9.39586	0.04692	9.34894					165	3959.57	99.66	17.3494	0.01292	17.3365
166	3872.08	97.46	7.25161	0.06804	7.18357					166	3913.97	98.51	17.4103	0.06948	17.3408
167	3968.82	99.89	8.55176	0.07267	8.47909					167	3970.09	99.93	17.4113	0.00069	17.4106
168	3961.04	99.7	9.29007	0.00082	9.28925					168	3961.12	99.7	17.4316	0.00102	17.4306
169	3887.16	97.84	9.26172	0.06588	9.19584					169	3972.35	99.98	17.3972	0.00136	17.3959
170	3935.28	99.05	8.93573	0.07018	8.86555					170	3923.9	98.76	17.3327	0.0681	17.2646
171	3923.9	98.76	9.41394	0.07118	9.34276					171	3934.24	99.02	17.414	0.06759	17.3464
172	3815.14	96.03	8.36878	0.07094	8.29784					172	3929.81	98.91	17.4437	0.07089	17.3728
173	3668.99	92.35	9.01263	0.07156	8.94107					173	3962.16	99.73	17.4412	0.07369	17.3675
174	3940.96	99.19	9.3879	0.07181	9.31609					174	3912.58	98.48	17.3937	0.07395	17.3197
175	3890.27	97.92	9.88772	0.07222	9.8155					175	3961.94	99.72	17.4474	0.0721	17.3753
176	3923.94	98.76	9.0244	0.07077	8.95363					176	3961.07	99.7	17.3672	0.07073	17.2965
177	3966.03	99.82	8.6675	0.07252	8.59498					177	3953.37	99.51	17.3109	0.07123	17.2397
178	3970.43	99.94	9.75298	0.00102	9.75196					178	3938.04	99.12	17.3955	0.07215	17.3233
179	3914.09	98.52	9.54987	0.07156	9.47831					179	3972.67	99.99	17.4126	0.00039	17.4123
180	3967.84	99.87	10.1861	0.03744	10.1486					180	3779.14	95.12	17.4388	0.07483	17.364
181	3656.61	92.04	7.47197	0.07161	7.40036					181	3966.86	99.85	17.4003	0.00024	17.4
182	3892.49	97.97	9.11435	0.07151	9.04284					182	3861.86	97.2	17.4188	0.06958	17.3492
183	3936.82	99.09	8.71917	0.06736	8.65181					183	3973	100	17.4351	0.00059	17.4345
184	3894.65	98.03	7.999	0.06941	7.92959					184	3848.84	96.87	17.4347	0.06874	17.366
185	3921.83	98.71	9.15245	0.06758	9.08487					185	3969.39	99.91	17.3581	0.0009	17.3572
186	3847.26	96.84	10.7315	0.07365	10.6578					186	3965.78	99.82	17.4234	0.07247	17.3509
187	3901.72	98.21	8.72608	0.07066	8.65542					187	3943.55	99.26	17.2455	0.0702	17.1753
188	3940.31	99.18	8.77228	0.06638	8.7059					188	3967.82	99.87	17.3462	0.00047	17.3457
189	3964.92	99.8	8.48659	0.07003	8.41656					189	3876.49	97.57	17.4041	0.07163	17.3325
190	3924.93	98.79	9.8158	0.07191	9.74389					190	3966.88	99.85	17.3807	0.07117	17.3096
191	3929.76	98.91	10.5819	0.0687	10.5132					191	3910.99	98.44	17.432	0.07233	17.3597
192	3930.1	98.92	8.96522	0.0668	8.89842					192	3939.34	99.15	17.1607	0.07555	17.0852
193	3893.93	98.01	6.91444	0.06846	6.84598					193	3971.98	99.97	17.3798	0.00024	17.3795
194	3966.03	99.82	8.55643	0.07166	8.48477					194	3916.44	98.58	17.4004	0.0004	17.4
195	3961.36	99.71	9.28849	0.07126	9.21723					195	3972.35	99.98	17.4385	0.00032	17.4382
196	3922.86	98.74	8.4683	0.07014	8.39816					196	3912.66	98.48	17.4424	0.07376	17.3686
197	3963.09	99.75	9.51828	0.07243	9.44585					197	3952.31	99.48	17.4226	0.00031	17.4223
198	3927.52	98.85	9.53142	0.06806	9.46336					198	3963.44	99.76	17.4422	0.07221	17.37
199	3936.31	99.08	10.8154	0.0705	10.7449					199	3970.95	99.95	17.4196	0.07278	17.3468
200	3714.42	93.49	10.1202	0.06862						200	3950.27	99.43	17.3797	0.07143	17.3083

## Sheet: 08_EACO_Seeds(225)
Fast Converegnce Exp							Fast Converegnce Exp			Slow Converegnce Exp							Slow Converegnce Exp
#	CBLF	Quality	Taumax	Taumin	DeltaTauminmax		Global Optimal Solution =	3972.67		#	CBLF	Quality	Taumax	Taumin	DeltaTauminmax		Global Optimal Solution =	3973
1	3933.99	99.02	8.76056	0.07086	8.6897		Minimum Optimal Solution =	3687.86		1	3933.99	99.02	17.4267	0.07086	17.3559		Minimum Optimal Solution =	3593.03
2	3952.87	99.49	9.52233	0.07594	9.44639		Mean of Optimal Solution =	3913.23		2	3926.46	98.83	17.4387	0.00041	17.4383		Mean of Optimal Solution =	3914.85
3	3972.5	99.99	4.32668	0.07044	4.25624		Median of Optimal Solution=	3913.23		3	3968.29	99.88	17.4149	0.0735	17.3414		Median of Optimal Solution =	3914.85
4	3827.54	96.34	9.19829	0.07205	9.12624		Solution Standrad Deviation =	59.2808		4	3957.16	99.6	17.4365	0.00098	17.4356		Solution Standrad Deviation =	59.5855
5	3972.35	99.98	10.4313	0.00102	10.4302		Average Price =	16.84		5	3967.33	99.86	17.4296	0.0736	17.356		Average Price =	63.545
6	3908.36	98.37	10.1025	0.04108	10.0614		Relability =	11		6	3925.45	98.8	17.4376	0.07199	17.3656		Relability =	8
7	3959.05	99.65	7.24239	0.06733	7.17506		Normalized Price =	153.091		7	3930.62	98.93	17.4409	0.06891	17.372		Normalized Price =	794.312
8	3766.03	94.79	7.78361	0.06887	7.71474		Average Solution Quality =	98.4954		8	3971.06	99.95	17.4082	0.0007	17.4075		Average Solution Quality =	98.5362
9	3788.81	95.36	9.33143	0.06944	9.26199		Average FDC =	-84.884		9	3761.96	94.69	17.4264	0.07161	17.3548		Average FDC =	-30.1742
10	3897.02	98.09	9.14029	0.06844	9.07185		Correlation Coefficent =	-1		10	3956.47	99.58	17.4167	0.0032	17.4135		Correlation Coefficent =	-1
11	3900.63	98.18	8.21386	0.07053	8.14333		Solution Robustness =	66.0118		11	3843.01	96.73	17.4188	0.06968	17.3492		Solution Robustness =	65.7014
12	3968.88	99.9	7.30199	0.07305	7.22894		Performance Rate =	0.0071259		12	3967.85	99.87	17.3278	0.07139	17.2564		Performance Rate =	0.001259
13	3931.14	98.95	7.79093	0.07114	7.71979		Average Elapsed Time =	0.78154		13	3965.26	99.8	17.3871	0.00427	17.3828		Average Elapsed Time =	2.9174
14	3964.27	99.78	9.40602	0.01377	9.39225					14	3972.35	99.98	17.155	0.0001	17.1549
15	3971.98	99.97	10.2994	0.02337	10.276					15	3855.15	97.03	17.4278	0.06628	17.3615
16	3937.77	99.11	8.86719	0.07343	8.79376					16	3929.59	98.91	17.4391	0.07217	17.3669
17	3941.68	99.21	9.02332	0.07287	8.95045					17	3875.83	97.55	17.4338	0.07335	17.3605
18	3949.75	99.41	8.51923	0.07553	8.4437					18	3945.61	99.31	17.4095	0.07504	17.3345
19	3855.66	97.05	7.11656	0.06921	7.04735					19	3949.23	99.4	17.3983	0.0714	17.3269
20	3940.44	99.18	7.00998	0.0683	6.94168					20	3947.16	99.35	17.4423	0.07479	17.3675
21	3970.09	99.93	9.53814	0.01811	9.52003					21	3916.57	98.58	17.4161	0.07127	17.3448
22	3930.62	98.93	10.5356	0.06891	10.4666					22	3893.59	98	17.3283	0.07165	17.2567
23	3921.11	98.69	7.239	0.07152	7.16748					23	3927.57	98.86	17.4093	0.07438	17.3349
24	3821.24	96.18	9.78666	0.07096	9.7157					24	3866	97.31	17.4411	0.07612	17.365
25	3937.57	99.11	9.36884	0.07025	9.29859					25	3916.46	98.58	17.2844	0.07228	17.2121
26	3967.85	99.87	7.35961	0.07079	7.28882					26	3964.3	99.78	17.3602	0.07057	17.2897
27	3938.83	99.14	6.82582	0.06979	6.75603					27	3966.86	99.85	17.4377	0.00015	17.4375
28	3809.64	95.89	10.1277	0.07281	10.0549					28	3896.37	98.07	17.4406	0.07279	17.3678
29	3929.19	98.9	10.1884	0.06494	10.1235					29	3964.94	99.8	17.4268	0.07194	17.3548
30	3934.76	99.04	7.67133	0.0717	7.59963					30	3939.41	99.15	17.3697	0.07112	17.2986
31	3971.46	99.96	10.1638	0.03804	10.1258					31	3895.72	98.05	17.4301	0.07116	17.3589
32	3916.46	98.58	8.9893	0.07195	8.91735					32	3962.16	99.73	17.352	0.06805	17.2839
33	3961.64	99.71	10.1061	0.041	10.0651					33	3972.35	99.98	17.3626	0.00057	17.362
34	3954.58	99.54	5.10457	0.07273	5.03184					34	3931.26	98.95	17.4168	0.07488	17.3419
35	3935.19	99.05	6.47198	0.06909	6.40289					35	3856.69	97.07	17.2049	0.07219	17.1327
36	3971.46	99.96	7.83474	0.06741	7.76733					36	3970.09	99.93	17.4268	0.00063	17.4261
37	3906.32	98.32	9.77407	0.07097	9.7031					37	3910.46	98.43	17.4452	0.06897	17.3763
38	3917.7	98.61	8.37388	0.07227	8.30161					38	3786.32	95.3	17.396	0.07074	17.3252
39	3902.55	98.23	10.0839	0.06283	10.0211					39	3916.81	98.59	17.4353	0.07164	17.3637
40	3965.24	99.8	6.58831	0.07363	6.51468					40	3880.99	97.68	17.4453	0.06968	17.3756
41	3890.3	97.92	9.0196	0.06749	8.95211					41	3934.81	99.04	17.4002	0.07252	17.3277
42	3864.96	97.28	5.81075	0.07163	5.73912					42	3888.23	97.87	17.4219	0.06934	17.3525
43	3968.47	99.89	5.89563	0.07228	5.82335					43	3952.85	99.49	17.2215	0.06969	17.1518
44	3968.36	99.88	6.9707	0.07007	6.90063					44	3967.53	99.86	17.4207	0.07344	17.3473
45	3780.41	95.15	10.6696	0.06687	10.6027					45	3964.09	99.78	17.3364	0.0736	17.2628
46	3926.8	98.84	10.7701	0.07536	10.6948					46	3845.21	96.78	17.3154	0.06809	17.2473
47	3970.73	99.94	6.89448	0.06731	6.82717					47	3959.22	99.65	17.3995	0.07196	17.3276
48	3940.95	99.19	8.71976	0.07379	8.64597					48	3912.24	98.47	17.3766	0.0019	17.3747
49	3876.85	97.58	9.53613	0.07223	9.4639					49	3908.39	98.37	17.4082	0.06713	17.3411
50	3972.5	99.99	5.58302	0.06992	5.5131					50	3940.96	99.19	17.4319	0.07559	17.3563
51	3958.02	99.62	7.68299	0.06727	7.61572					51	3947.47	99.36	17.444	0.00032	17.4437
52	3966.05	99.82	8.79896	0.074	8.72496					52	3960.21	99.68	17.4265	0.07283	17.3537
53	3940.12	99.17	10.3523	0.07178	10.2805					53	3854.7	97.02	17.3934	0.06877	17.3246
54	3948.2	99.38	10.7515	0.07292	10.6785					54	3945.61	99.31	17.445	0.06898	17.376
55	3964.59	99.79	8.00485	0.07342	7.93143					55	3948.26	99.38	17.4201	0.07092	17.3492
56	3793.46	95.48	10.174	0.0713	10.1027					56	3803.51	95.73	17.4269	0.07019	17.3567
57	3873.75	97.5	10.2107	0.07445	10.1363					57	3940.44	99.18	17.4438	1e-05	17.4438
58	3968.36	99.88	9.03322	0.07261	8.96061					58	3949.87	99.42	17.429	0.07188	17.3571
59	3968.88	99.9	10.9293	0.02112	10.9081					59	3952.43	99.48	17.4296	0.07412	17.3554
60	3830.91	96.42	9.71056	0.06938	9.64118					60	3900.12	98.17	17.4196	0.07211	17.3475
61	3966.88	99.85	9.83167	0.07221	9.75946					61	3922.3	98.72	17.4143	0.06773	17.3466
62	3868.29	97.36	6.96878	0.00847	6.96031					62	3968.47	99.89	17.408	0.00351	17.4045
63	3907.16	98.34	9.03757	0.06868	8.96889					63	3972.5	99.99	17.4211	0.06779	17.3533
64	3879.55	97.65	10.897	0.07545	10.8215					64	3970.41	99.93	17.4068	0.00014	17.4066
65	3911.41	98.45	10.3321	0.07447	10.2576					65	3827.69	96.34	17.4236	0.07284	17.3508
66	3916.14	98.57	10.2776	0.06867	10.2089					66	3928.03	98.87	17.4332	0.07174	17.3615
67	3900.97	98.19	7.93543	0.06775	7.86768					67	3923.71	98.76	17.3822	0.06794	17.3143
68	3902.56	98.23	5.5956	0.07197	5.52363					68	3906.84	98.33	17.3971	0.07087	17.3262
69	3766.72	94.81	6.92545	0.0699	6.85555					69	3938.09	99.12	17.3541	0.00928	17.3448
70	3972.03	99.98	8.90959	0.00082	8.90877					70	3932.63	98.98	17.4315	0.07086	17.3607
71	3892.88	97.98	8.16824	0.07185	8.09639					71	3949.82	99.42	17.4418	0.07117	17.3706
72	3687.86	92.82	10.703	0.06629	10.6367					72	3850.49	96.92	17.2276	0.07385	17.1537
73	3968.36	99.88	10.0587	0.07236	9.98633					73	3942.3	99.23	17.4279	0.00012	17.4277
74	3951.05	99.45	10.5062	0.07245	10.4338					74	3815.68	96.04	17.4158	0.07084	17.3449
75	3972.35	99.98	8.71402	0.06932	8.6447					75	3912.56	98.48	17.3823	0.00019	17.3821
76	3869.17	97.39	9.52717	0.06848	9.45869					76	3940.44	99.18	17.4249	0.06831	17.3566
77	3922.67	98.73	9.52012	0.07326	9.44686					77	3920.64	98.68	17.3963	0.00018	17.3961
78	3960.51	99.69	10.0645	0.07392	9.99055					78	3909.37	98.4	17.4402	0.07319	17.367
79	3928.72	98.89	7.45257	0.07209	7.38048					79	3925	98.79	17.4176	0.07067	17.3469
80	3929.59	98.91	8.81475	0.07243	8.74232					80	3967.84	99.87	17.4184	0.073	17.3454
81	3891.37	97.95	9.53447	0.06934	9.46513					81	3881.04	97.69	17.414	0.07174	17.3422
82	3949.08	99.4	6.82787	0.06438	6.76349					82	3958.78	99.64	17.3655	7e-05	17.3654
83	3806.22	95.8	10.2697	0.0675	10.2022					83	3925.96	98.82	17.3827	0.0741	17.3086
84	3914.53	98.53	8.77892	0.07458	8.70434					84	3889.26	97.89	17.4463	0.07276	17.3736
85	3848.42	96.86	10.3853	0.07171	10.3136					85	3962.98	99.75	17.4236	0.00034	17.4233
86	3900.12	98.17	10.8143	0.07226	10.7421					86	3921.96	98.72	17.424	0.0729	17.3511
87	3942.06	99.22	9.46168	0.07491	9.38677					87	3964.59	99.79	17.4474	0.0003	17.4471
88	3969.12	99.9	7.66613	0.06991	7.59622					88	3889.3	97.89	17.433	0.00033	17.4326
89	3874.11	97.51	7.48314	0.07277	7.41037					89	3905.2	98.29	17.4261	0.06741	17.3586
90	3778.13	95.09	8.54504	0.07004	8.475					90	3917.13	98.59	17.4284	0.06795	17.3605
91	3884.13	97.76	8.89184	0.0518	8.84004					91	3973	100	17.3444	0.01132	17.3331
92	3971.06	99.95	7.95356	0.00044	7.95312					92	3861.34	97.19	17.3248	0.06931	17.2554
93	3916.25	98.57	8.45385	0.06975	8.3841					93	3782.14	95.2	17.4178	0.07086	17.3469
94	3916.66	98.58	10.3337	0.06962	10.2641					94	3951.9	99.47	17.3965	0.0714	17.3251
95	3958.02	99.62	8.98655	0.07223	8.91432					95	3923.38	98.75	17.3733	0.0678	17.3055
96	3972.67	99.99	9.57946	0.07019	9.50927					96	3955.44	99.56	17.3667	0.06854	17.2981
97	3964.74	99.79	6.86531	0.07209	6.79322					97	3681.43	92.66	17.3952	0.07171	17.3235
98	3958.02	99.62	7.18282	0.06713	7.11569					98	3937.45	99.1	17.4312	0.00027	17.4309
99	3964.92	99.8	9.18587	0.07303	9.11284					99	3961.16	99.7	17.2527	0.06933	17.1834
100	3910.46	98.43	10.4374	0.02288	10.4145					100	3948.93	99.39	17.4402	0.07075	17.3694
101	3908.69	98.38	9.53099	0.0567	9.47429					101	3925	98.79	17.4471	0.0747	17.3724
102	3895.93	98.06	10.4631	0.06976	10.3934					102	3892.64	97.98	17.4275	0.06483	17.3626
103	3872.93	97.48	9.31121	0.06537	9.24584					103	3929.51	98.91	17.4376	0.07253	17.3651
104	3874.78	97.53	10.2179	0.07111	10.1468					104	3968.88	99.9	17.437	0.00014	17.4369
105	3897.49	98.1	7.99066	0.06883	7.92183					105	3896.5	98.07	17.4361	0.07074	17.3653
106	3964.94	99.8	8.62246	0.07194	8.55052					106	3715.4	93.52	17.3543	0.06704	17.2873
107	3885.54	97.8	10.084	0.07015	10.0139					107	3888.74	97.88	17.4084	0.06783	17.3406
108	3793.5	95.48	10.4713	0.0711	10.4002					108	3908.39	98.37	17.4318	0.07001	17.3618
109	3853.07	96.98	10.6466	0.07528	10.5713					109	3960.51	99.69	17.4327	0.07352	17.3592
110	3947.79	99.37	7.11451	0.07384	7.04067					110	3791.03	95.42	17.3115	0.07082	17.2407
111	3961.64	99.71	8.49678	0.07456	8.42222					111	3789.23	95.37	17.4372	0.06865	17.3685
112	3964.59	99.79	9.43437	0.07104	9.36333					112	3940.45	99.18	17.4488	0.06923	17.3796
113	3856.7	97.07	9.17991	0.07078	9.10913					113	3940.68	99.19	17.42	0.00053	17.4195
114	3825.35	96.28	7.98175	0.07119	7.91056					114	3818.93	96.12	17.287	0.06691	17.2201
115	3919.76	98.66	10.324	0.07234	10.2516					115	3929.07	98.89	17.4048	0.0693	17.3355
116	3954.92	99.54	7.91544	0.07068	7.84476					116	3960.51	99.69	17.4034	0.07469	17.3287
117	3962.59	99.74	8.87268	0.06935	8.80333					117	3955.44	99.56	17.4121	0.00086	17.4112
118	3918.21	98.62	9.78903	0.07014	9.71889					118	3947.16	99.35	17.4421	0.00017	17.4419
119	3955.44	99.56	8.67287	0.07002	8.60285					119	3803.44	95.73	17.4394	0.06878	17.3706
120	3953.7	99.51	7.53107	0.07283	7.45824					120	3746.57	94.3	17.178	0.06835	17.1096
121	3874.78	97.53	9.48879	0.07106	9.41773					121	3903.74	98.26	17.401	0.06699	17.334
122	3945.88	99.32	8.21844	0.06935	8.14909					122	3959.68	99.66	17.4313	0.06767	17.3636
123	3888.97	97.88	8.54155	0.06872	8.47283					123	3955.44	99.56	17.3961	0.06877	17.3274
124	3970.95	99.95	7.08112	0.01227	7.06885					124	3833.19	96.48	17.4242	0.07242	17.3518
125	3802.88	95.72	9.02129	0.07001	8.95128					125	3891.85	97.96	17.3934	0.06818	17.3252
126	3929.84	98.91	10.37	0.0707	10.2993					126	3966.38	99.83	17.4359	0.07113	17.3648
127	3914.64	98.53	9.86724	0.07146	9.79578					127	3894.16	98.02	17.3748	0.07057	17.3042
128	3949.75	99.41	8.11138	0.07415	8.03723					128	3969.91	99.92	17.4106	0.07335	17.3373
129	3890.3	97.92	9.62467	0.07133	9.55334					129	3949.75	99.41	17.4476	0.07405	17.3735
130	3935.01	99.04	9.30337	0.0759	9.22747					130	3946.13	99.32	17.3593	0.07361	17.2857
131	3972.35	99.98	10.0779	0.05254	10.0254					131	3955.25	99.55	17.4415	0.07129	17.3702
132	3920.8	98.69	8.83239	0.06882	8.76357					132	3954.92	99.54	17.4278	0.07327	17.3545
133	3813.26	95.98	9.29524	0.07337	9.22187					133	3889.93	97.91	17.2492	0.07272	17.1764
134	3896.87	98.08	10.1023	0.07249	10.0298					134	3891.56	97.95	17.4419	0.00016	17.4418
135	3964.62	99.79	8.03561	0.0735	7.96211					135	3841.24	96.68	17.1366	0.07545	17.0612
136	3939.34	99.15	4.25459	0.07254	4.18205					136	3961.64	99.71	17.4342	0.07274	17.3615
137	3958.78	99.64	8.92346	0.06969	8.85377					137	3914.32	98.52	17.4297	0.07227	17.3574
138	3912.53	98.48	10.5156	0.07335	10.4422					138	3958.54	99.64	17.1152	0.07124	17.044
139	3797.19	95.57	9.21648	0.07111	9.14537					139	3972.5	99.99	17.3089	0.00015	17.3087
140	3922.86	98.74	9.63378	0.07065	9.56313					140	3968.36	99.88	17.4333	0.0713	17.362
141	3945.61	99.31	8.05961	0.06853	7.99108					141	3818.49	96.11	17.4491	0.06785	17.3813
142	3943.59	99.26	10.003	0.07495	9.92809					142	3962.33	99.73	17.3774	0.0034	17.374
143	3929.43	98.9	9.5394	0.07358	9.46582					143	3971.52	99.96	17.4255	0.07079	17.3548
144	3905.29	98.3	9.07499	0.07296	9.00203					144	3867.91	97.35	17.402	0.07272	17.3293
145	3735.36	94.02	10.312	0.07276	10.2393					145	3921.83	98.71	17.357	0.07024	17.2867
146	3881.86	97.71	10.6687	0.07079	10.5979					146	3970.73	99.94	17.4157	0.00156	17.4141
147	3961.04	99.7	9.76683	0.04063	9.7262					147	3900.25	98.17	17.4381	0.07315	17.365
148	3902.02	98.21	6.62822	0.07149	6.55673					148	3933.71	99.01	17.4368	0.06938	17.3674
149	3860.83	97.18	9.66548	0.07156	9.59392					149	3951.82	99.47	17.4349	0.00031	17.4346
150	3930.62	98.93	9.45715	0.07248	9.38467					150	3876.85	97.58	17.4415	0.07331	17.3682
151	3787.41	95.33	10.0877	0.07249	10.0152					151	3890.82	97.93	17.377	0.07127	17.3058
152	3866	97.31	9.07078	0.07162	8.99916					152	3963.79	99.77	17.4088	0.07173	17.3371
153	3724.64	93.75	9.27025	0.0694	9.20085					153	3936.62	99.08	17.4403	0.07315	17.3672
154	3768.21	94.85	8.61795	0.06846	8.54949					154	3935.51	99.06	17.4445	0.00018	17.4443
155	3864.96	97.28	10.2839	0.07277	10.2111					155	3875.84	97.55	17.4345	0.06885	17.3657
156	3959.05	99.65	10.222	0.07183	10.1502					156	3956.33	99.58	17.4285	0.06656	17.362
157	3866.03	97.31	5.31238	0.07206	5.24032					157	3878.41	97.62	17.3572	0.06789	17.2894
158	3822.08	96.2	10.4829	0.00324	10.4796					158	3924.42	98.78	17.4258	0.07238	17.3535
159	3947.14	99.35	3.42726	0.0718	3.35546					159	3863.28	97.24	17.3916	0.07085	17.3208
160	3923.16	98.75	9.68604	0.07331	9.61273					160	3966.53	99.84	17.4081	0.00127	17.4069
161	3952.85	99.49	6.2498	0.06969	6.18011					161	3970.73	99.94	17.4388	0.00037	17.4384
162	3909.94	98.41	6.99553	0.06996	6.92557					162	3928.19	98.87	17.432	0.07032	17.3616
163	3946.13	99.32	9.41287	0.07284	9.34003					163	3961.07	99.7	17.4194	0.0701	17.3493
164	3963.19	99.75	7.76217	0.01916	7.74301					164	3724.86	93.75	17.4245	0.0731	17.3514
165	3864.49	97.27	8.54825	0.06648	8.48177					165	3958.45	99.63	17.3154	0.00013	17.3153
166	3956.66	99.59	8.30534	0.07077	8.23457					166	3861.66	97.2	17.3587	0.07227	17.2865
167	3956.63	99.59	8.38499	0.06766	8.31733					167	3593.03	90.44	17.1995	0.06929	17.1302
168	3930.34	98.93	6.59455	0.01576	6.57879					168	3971.46	99.96	17.4367	0.00046	17.4362
169	3970.73	99.94	8.3169	0.01803	8.29887					169	3880.47	97.67	17.4106	0.07228	17.3383
170	3945.85	99.32	7.88705	0.06867	7.81838					170	3887	97.84	17.3892	0.07301	17.3162
171	3922.92	98.74	9.53683	0.07002	9.46681					171	3939.06	99.15	17.3971	0.00183	17.3953
172	3811.2	95.93	5.99904	0.07341	5.92563					172	3891.52	97.95	17.4301	0.07113	17.359
173	3929.28	98.9	10.5994	0.07011	10.5293					173	3967.2	99.85	17.3604	0.07195	17.2885
174	3971.38	99.96	7.28653	0.01197	7.27456					174	3912.01	98.46	17.4384	0.00104	17.4374
175	3926.47	98.83	7.80056	0.07165	7.72891					175	3880.47	97.67	17.4417	0.07347	17.3683
176	3940.12	99.17	9.30924	0.07265	9.23659					176	3962.67	99.74	17.4415	0.00045	17.4411
177	3948.07	99.37	5.60904	0.0731	5.53594					177	3906.39	98.32	17.4243	0.07026	17.354
178	3944	99.27	8.83486	0.07435	8.76051					178	3930.62	98.93	17.4422	0.07106	17.3711
179	3949.23	99.4	7.8096	0.07242	7.73718					179	3923.9	98.76	17.4389	0.07336	17.3655
180	3893.45	98	9.94605	0.0727	9.87335					180	3949.22	99.4	17.4214	0.06711	17.3543
181	3734.25	93.99	10.4871	0.07037	10.4168					181	3940.44	99.18	17.3368	0.07082	17.266
182	3954.25	99.53	6.72994	0.07236	6.65758					182	3932.17	98.97	17.435	0.00033	17.4347
183	3912.53	98.48	10.0322	0.07211	9.96012					183	3939.98	99.17	17.4376	0.07679	17.3608
184	3970.09	99.93	8.85877	0.07397	8.7848					184	3960.09	99.67	17.2715	0.07506	17.1964
185	3949.23	99.4	9.21438	0.07098	9.1434					185	3848.74	96.87	17.3963	0.06893	17.3274
186	3967.5	99.86	8.67381	0.04837	8.62544					186	3933.84	99.01	17.4187	0.06927	17.3495
187	3958.54	99.64	9.69057	0.0751	9.61547					187	3895.46	98.05	17.4354	0.07312	17.3623
188	3825.6	96.29	8.1967	0.06908	8.12762					188	3878.31	97.62	17.4288	0.00113	17.4276
189	3825.39	96.28	10.267	0.07349	10.1936					189	3943.94	99.27	17.4397	0.07094	17.3688
190	3945.61	99.31	9.13919	0.07065	9.06854					190	3970.73	99.94	17.4391	0.00062	17.4385
191	3953.61	99.51	9.8513	0.06639	9.78491					191	3945.32	99.3	17.4183	0.07202	17.3463
192	3931.14	98.95	9.02512	0.06954	8.95558					192	3964.27	99.78	17.2306	0.02363	17.2069
193	3970.09	99.93	8.81354	0.06449	8.74905					193	3907.54	98.35	17.4414	0.0723	17.3691
194	3832.69	96.47	8.98761	0.06924	8.91837					194	3917.1	98.59	17.4015	0.06975	17.3317
195	3968.36	99.88	9.96643	0.03258	9.93385					195	3941.33	99.2	17.4034	0.00127	17.4022
196	3970.43	99.94	8.80062	0.04816	8.75246					196	3969.39	99.91	17.4193	0.00099	17.4183
197	3972.03	99.98	9.68877	0.04824	9.64053					197	3783.18	95.22	17.376	0.0663	17.3097
198	3967.18	99.85	8.84218	0.07243	8.76975					198	3970.73	99.94	17.3892	0.00041	17.3888
199	3971.06	99.95	8.97171	0.04867	8.92304					199	3912.01	98.46	17.4291	0.0751	17.3541
200	3898.63	98.13	10.4332	0.07057	10.3627					200	3784.13	95.25	17.4308	0.07108	17.3597

## Sheet: 09_EACO_Seeds(11)
Fast Converegnce Exp							Fast Converegnce Exp			Slow Converegnce Exp							Slow Converegnce Exp
#	CBLF	Quality	Taumax	Taumin	DeltaTauminmax		Global Optimal Solution =	3973		#	CBLF	Quality	Taumax	Taumin	DeltaTauminmax		Global Optimal Solution =	3973.01
1	3964.92	99.8	4.98897	0.0729	4.91607		Minimum Optimal Solution =	3624.33		1	3964.92	99.8	17.3468	0.00425	17.3426		Minimum Optimal Solution =	3720.57
2	3902.7	98.23	9.52203	0.06984	9.45219		Mean of Optimal Solution =	3920.47		2	3935.07	99.05	17.327	0.07328	17.2538		Mean of Optimal Solution =	3926.93
3	3962.33	99.73	7.5534	0.02956	7.52384		Median of Optimal Solution =	3920.47		3	3958.8	99.64	17.4229	0.06844	17.3545		Median of Optimal Solution =	3926.93
4	3839.64	96.64	9.76443	0.07046	9.69397		Solution Standrad Deviation =	58.4821		4	3964.74	99.79	17.4322	0.06891	17.3633		Solution Standrad Deviation =	50.0417
5	3856.32	97.06	7.20748	0.06852	7.13896		Average Price =	17.245		5	3962.16	99.73	17.4316	0.00025	17.4314		Average Price =	64.26
6	3816.43	96.06	5.88024	0.06861	5.81163		Relability =	10.5		6	3972.67	99.99	17.429	0.00044	17.4286		Relability =	11
7	3971.52	99.96	9.31919	0.07184	9.24735		Normalized Price =	164.238		7	3964.74	99.79	17.2361	0	17.2361		Normalized Price =	584.182
8	3970.23	99.93	9.46576	0.06914	9.39662		Average Solution Quality =	98.6775		8	3928.03	98.87	17.4462	0.07426	17.372		Average Solution Quality =	98.8401
9	3960.61	99.69	9.7062	0.07401	9.63219		Average FDC =	-85.8018		9	3930.93	98.94	17.4423	0.07346	17.3689		Average FDC =	-30.4592
10	3914.96	98.54	8.81234	0.07227	8.74007		Correlation Coefficent =	-1		10	3925.81	98.81	17.416	0.00025	17.4157		Correlation Coefficent =	-1
11	3961.83	99.72	8.84551	0.06981	8.7757		Solution Robustness =	67.037		11	3861.74	97.2	17.4468	0.0701	17.3767		Solution Robustness =	78.4731
12	3900.89	98.18	6.37986	0.07067	6.30919		Performance Rate =	0.0060887		12	3923.88	98.76	17.3687	0.00497	17.3637		Performance Rate =	0.0017118
13	3928.03	98.87	10.1839	0.07414	10.1098		Average Elapsed Time =	0.80385		13	3970.41	99.93	17.1948	6e-05	17.1947		Average Elapsed Time =	2.9667
14	3918.73	98.63	7.31873	0.07078	7.24795					14	3965.26	99.8	17.4365	0.0005	17.436
15	3953.37	99.51	7.92242	0.06539	7.85703					15	3776.03	95.04	17.4392	0.07134	17.3678
16	3936.04	99.07	9.93768	0.07182	9.86586					16	3811.71	95.94	17.4438	0.07171	17.3721
17	3921.82	98.71	7.47837	0.07019	7.40818					17	3875.3	97.54	17.4416	0.07333	17.3682
18	3922.27	98.72	5.76513	0.07528	5.68985					18	3971.98	99.97	17.4345	0.00065	17.4338
19	3967.5	99.86	8.3682	0.02633	8.34187					19	3854.84	97.03	17.2405	0.06907	17.1714
20	3924.42	98.78	9.88578	0.06962	9.81616					20	3860.19	97.16	17.4316	0.06951	17.3621
21	3936.31	99.08	10.7819	0.07059	10.7113					21	3937.86	99.12	17.4254	0.07767	17.3477
22	3964.27	99.78	9.51769	0.07356	9.44413					22	3962.8	99.74	17.4351	0.07278	17.3623
23	3964.59	99.79	8.4409	0.07634	8.36456					23	3918.8	98.64	17.4331	0.0732	17.3599
24	3937.86	99.12	9.22773	0.07106	9.15667					24	3966.56	99.84	17.4256	0.07333	17.3523
25	3940.96	99.19	6.21953	0.07119	6.14834					25	3952.46	99.48	17.2529	0.06996	17.183
26	3846.35	96.81	8.82166	0.0673	8.75436					26	3902.21	98.22	17.4067	0.06872	17.3379
27	3970.41	99.93	9.03417	0.06971	8.96446					27	3952.46	99.48	17.3892	0.07122	17.318
28	3970.95	99.95	8.45551	0.07173	8.38378					28	3952.33	99.48	17.429	0.07144	17.3575
29	3790.24	95.4	8.93559	0.07126	8.86433					29	3934.24	99.02	17.3504	0.07124	17.2792
30	3967.02	99.85	9.23401	0.06814	9.16587					30	3970.09	99.93	17.4045	1e-05	17.4045
31	3961.39	99.71	6.39348	0.07252	6.32096					31	3937.86	99.12	17.3852	0.07263	17.3125
32	3877.89	97.61	10.385	0.07336	10.3117					32	3951.02	99.45	17.4407	0.00016	17.4405
33	3938.09	99.12	6.04891	0.07121	5.9777					33	3858.76	97.12	17.4338	0.06867	17.3651
34	3973	100	8.68351	0.0747	8.60881					34	3875.86	97.55	17.4212	0.07183	17.3494
35	3972.03	99.98	8.54763	0.03921	8.50842					35	3959.05	99.65	17.4338	0.07231	17.3615
36	3966.53	99.84	10.3094	0.03722	10.2721					36	3953.89	99.52	17.4453	0.07283	17.3725
37	3960.01	99.67	10.1399	0.071	10.0689					37	3958.02	99.62	17.4282	0.00109	17.4271
38	3868.07	97.36	9.52581	0.07263	9.45318					38	3889.78	97.91	17.4306	0.06784	17.3628
39	3864.09	97.26	10.3669	0.02307	10.3438					39	3921.63	98.71	17.4265	0.07584	17.3507
40	3968.36	99.88	8.61054	0.06974	8.5408					40	3966.86	99.85	17.4125	0.00041	17.4121
41	3937.86	99.12	9.41477	0.06782	9.34695					41	3967.53	99.86	17.2318	0.06963	17.1622
42	3946.13	99.32	8.24632	0.07111	8.17521					42	3923.55	98.76	17.3985	0.00455	17.3939
43	3923.88	98.76	5.69691	0.07136	5.62555					43	3754.88	94.51	17.152	0.06824	17.0838
44	3954.1	99.52	8.29249	0.07003	8.22246					44	3943.03	99.25	17.4454	0.07219	17.3732
45	3952.85	99.49	9.76585	0.07288	9.69297					45	3951.69	99.46	17.403	0.07455	17.3285
46	3926.34	98.83	9.88298	0.07097	9.81201					46	3924.82	98.79	17.3415	0.07244	17.2691
47	3925.97	98.82	10.2493	0.07207	10.1772					47	3969.44	99.91	17.3868	0.00286	17.384
48	3962.67	99.74	9.95307	0.04808	9.90499					48	3949.75	99.41	17.432	0.07161	17.3604
49	3943.55	99.26	10.0504	0.07347	9.97694					49	3914.45	98.53	17.4152	0.06756	17.3476
50	3971.06	99.95	8.58759	0.00802	8.57957					50	3931.14	98.95	17.3525	0.07293	17.2796
51	3920.88	98.69	6.90312	0.07002	6.8331					51	3856.04	97.06	17.3483	0.06977	17.2786
52	3943.55	99.26	8.71295	0.00858	8.70437					52	3943.59	99.26	17.3379	0.01731	17.3206
53	3866.51	97.32	6.44801	0.06841	6.3796					53	3968.36	99.88	17.3714	0.0003	17.3711
54	3953.08	99.5	8.18687	0.07151	8.11536					54	3956.47	99.58	17.4345	0.00044	17.434
55	3962.59	99.74	9.51856	0.07136	9.4472					55	3956.98	99.6	17.3931	0.07181	17.3213
56	3873.58	97.5	7.58947	0.06787	7.5216					56	3968.8	99.89	17.3631	0.01357	17.3495
57	3962.98	99.75	8.28651	0.07011	8.2164					57	3967.84	99.87	17.4362	0.00092	17.4353
58	3924.2	98.77	9.16287	0.0218	9.14107					58	3953.37	99.51	17.41	0.07322	17.3368
59	3959.05	99.65	4.36059	0.07312	4.28747					59	3951.46	99.46	17.4043	0.07122	17.333
60	3971.98	99.97	9.71495	0.03715	9.6778					60	3962.67	99.74	17.4053	0.00143	17.4038
61	3795.42	95.53	8.33361	0.0661	8.26751					61	3970.73	99.94	17.3815	0.00182	17.3797
62	3870.65	97.42	10.0932	0.07151	10.0217					62	3930.62	98.93	17.4387	0.07261	17.3661
63	3915.91	98.56	7.86653	0.06078	7.80575					63	3969.47	99.91	17.3663	0.07038	17.296
64	3904.65	98.28	9.95031	0.06723	9.88308					64	3961.12	99.7	17.4403	0.00029	17.4401
65	3926.4	98.83	10.7274	0.07257	10.6549					65	3917.7	98.61	17.4402	0.07461	17.3656
66	3915.63	98.56	6.41036	0.0704	6.33996					66	3939.48	99.16	17.4087	0.07265	17.3361
67	3943.55	99.26	9.45309	0.06705	9.38604					67	3930.92	98.94	17.4123	0.07124	17.341
68	3833.94	96.5	9.35901	0.07232	9.28669					68	3768.05	94.84	17.4293	0.06936	17.36
69	3923.55	98.76	9.28769	0.06753	9.22016					69	3852.55	96.97	17.4365	0.07134	17.3652
70	3828.77	96.37	9.87677	0.07322	9.80355					70	3880.64	97.68	17.4349	0.07167	17.3632
71	3946.13	99.32	9.86391	0.07353	9.79038					71	3875.3	97.54	17.4096	0.07177	17.3378
72	3954.93	99.54	8.54752	0.06948	8.47804					72	3945.61	99.31	17.4164	0.00248	17.4139
73	3969.76	99.92	6.29556	0.07157	6.22399					73	3900.75	98.18	17.4332	0.07271	17.3605
74	3958.8	99.64	8.3977	0.06838	8.32932					74	3936.31	99.08	17.4164	0.07128	17.3451
75	3801.29	95.68	9.32714	0.07205	9.25509					75	3922.35	98.72	17.3565	0.07069	17.2858
76	3903.22	98.24	9.36867	0.07225	9.29642					76	3960.09	99.67	17.3578	0.07159	17.2863
77	3970.23	99.93	10.0744	0.07204	10.0024					77	3962.16	99.73	17.3885	0.0001	17.3884
78	3933.57	99.01	8.96672	0.0711	8.89562					78	3942.76	99.24	17.3965	0.07676	17.3198
79	3958.89	99.64	10.1338	0.07111	10.0627					79	3960.72	99.69	17.4142	0.00094	17.4132
80	3964.74	99.79	9.35719	0.05464	9.30255					80	3970.73	99.94	17.3585	0.00046	17.3581
81	3973	100	8.67982	0.07118	8.60864					81	3959.13	99.65	17.4244	0.0694	17.3549
82	3968.47	99.89	6.21699	0.07237	6.14462					82	3931.95	98.97	17.4139	0.00013	17.4137
83	3874.45	97.52	10.3384	0.07056	10.2679					83	3959.75	99.67	17.4242	0.00107	17.4231
84	3947.49	99.36	10.1561	0.07322	10.0829					84	3765.04	94.77	17.2194	0.07175	17.1477
85	3939.93	99.17	8.7566	0.07197	8.68463					85	3958.02	99.62	17.4452	0.0699	17.3753
86	3924.93	98.79	10.7522	0.07329	10.6789					86	3906.44	98.32	17.3849	0.07182	17.3131
87	3913.04	98.49	8.33491	0.07115	8.26376					87	3971.85	99.97	17.1611	0.0718	17.0893
88	3949.23	99.4	8.55041	0.06706	8.48335					88	3756.39	94.55	17.1517	0.06995	17.0817
89	3956.47	99.58	7.62957	0.01463	7.61494					89	3720.57	93.65	17.4386	0.06887	17.3697
90	3915.63	98.56	10.3474	0.07115	10.2762					90	3966.53	99.84	17.3879	0.00029	17.3876
91	3891.2	97.94	10.045	0.07169	9.97328					91	3850.49	96.92	17.37	0.0675	17.3025
92	3961.04	99.7	8.09929	0.06903	8.03026					92	3934.57	99.03	17.428	0.06879	17.3592
93	3959.05	99.65	9.56209	0.0222	9.53989					93	3961.64	99.71	17.4127	0.00027	17.4124
94	3810.53	95.91	6.96591	0.06849	6.89742					94	3925.45	98.8	17.4333	0.06931	17.3639
95	3966.88	99.85	9.23473	0.07052	9.16421					95	3949.75	99.41	17.4334	0.00016	17.4333
96	3828.77	96.37	10.1637	0.07011	10.0936					96	3911.87	98.46	17.4273	0.07114	17.3561
97	3953.37	99.51	10.3248	0.00126	10.3236					97	3953.28	99.5	17.3979	0.00134	17.3966
98	3972.5	99.99	9.03984	0.00049	9.03935					98	3959.05	99.65	17.4325	0.07155	17.361
99	3972.5	99.99	10.3179	0.02162	10.2963					99	3950.19	99.43	17.423	0.07162	17.3514
100	3853.19	96.98	9.72786	0.0724	9.65546					100	3957.63	99.61	17.4205	0.06907	17.3514
101	3970.43	99.94	5.54483	0.02234	5.52249					101	3952.73	99.49	17.4341	0.07123	17.3629
102	3890.99	97.94	9.50591	0.06979	9.43612					102	3968.15	99.88	17.4155	0.00062	17.4149
103	3965.26	99.8	8.2965	0.0724	8.2241					103	3972.35	99.98	17.427	0.00045	17.4265
104	3941.28	99.2	8.16935	0.07192	8.09743					104	3952.33	99.48	17.3578	0.0003	17.3575
105	3930.1	98.92	8.49901	0.0718	8.42721					105	3961.68	99.71	17.4092	0.00343	17.4057
106	3893.91	98.01	10.2376	0.07193	10.1657					106	3968.8	99.89	17.208	0.00941	17.1986
107	3970.43	99.94	8.76865	0.07235	8.6963					107	3973.01	100	17.2939	0.02243	17.2715
108	3962.16	99.73	8.17035	0.01781	8.15254					108	3921.31	98.7	17.4405	0.07455	17.366
109	3852.55	96.97	10.7004	0.07267	10.6277					109	3972.35	99.98	17.4364	0.00042	17.436
110	3958.54	99.64	7.24816	0.07066	7.1775					110	3943.47	99.26	17.4276	0.07034	17.3572
111	3927.87	98.86	8.63077	0.07006	8.56071					111	3917.7	98.61	17.4201	0.06795	17.3522
112	3948.2	99.38	7.6458	0.07197	7.57383					112	3952.64	99.49	17.4156	0.00049	17.4151
113	3958.54	99.64	10.4695	0.04071	10.4288					113	3912.66	98.48	17.4021	0.07107	17.331
114	3882.23	97.72	8.99219	0.07218	8.92001					114	3786.51	95.31	17.3989	0.06715	17.3317
115	3921.7	98.71	10.1909	0.07361	10.1173					115	3926.8	98.84	17.3919	0.07345	17.3185
116	3902.34	98.22	7.17268	0.07307	7.09961					116	3903.19	98.24	17.3101	0.00395	17.3061
117	3637.8	91.56	9.49023	0.07089	9.41934					117	3972.67	99.99	17.4143	0.00092	17.4134
118	3931.58	98.96	8.49819	0.07129	8.4269					118	3945.55	99.31	17.4237	0.07251	17.3512
119	3948.58	99.39	9.59041	0.07279	9.51762					119	3926.47	98.83	17.4144	0.07269	17.3417
120	3968.36	99.88	8.83781	0.07546	8.76235					120	3882.18	97.71	17.4401	0.07127	17.3688
121	3954.37	99.53	7.44659	0.07363	7.37296					121	3821.4	96.18	17.3963	0.06949	17.3268
122	3972.35	99.98	6.7777	0.00866	6.76904					122	3945.53	99.31	17.3268	0.01435	17.3124
123	3909.66	98.41	4.79429	0.0673	4.72699					123	3943.26	99.25	17.424	0.00032	17.4237
124	3943.55	99.26	8.32682	0.07261	8.25421					124	3917.74	98.61	17.4258	0.00044	17.4254
125	3847.33	96.84	10.6332	0.07054	10.5627					125	3961.64	99.71	17.4032	0.07075	17.3324
126	3844.28	96.76	6.97855	0.06858	6.90997					126	3886.35	97.82	17.441	0.07303	17.368
127	3906.75	98.33	7.82261	0.06889	7.75372					127	3932.28	98.97	17.4323	0.00031	17.432
128	3802.72	95.71	10.5209	0.07384	10.4471					128	3931.45	98.95	17.4173	0.07212	17.3451
129	3951.76	99.47	6.77402	0.07437	6.69965					129	3973	100	17.4172	0.0003	17.4169
130	3850.49	96.92	9.22737	0.07229	9.15508					130	3958.45	99.63	17.4388	0.00048	17.4383
131	3939.83	99.16	8.86278	0.07228	8.7905					131	3959.57	99.66	17.4401	0.00016	17.44
132	3905.29	98.3	7.21468	0.07164	7.14304					132	3897.05	98.09	17.4446	0.00018	17.4444
133	3719.45	93.62	9.47392	0.07053	9.40339					133	3970.41	99.93	17.3567	0.00011	17.3566
134	3961.94	99.72	9.07644	0.07266	9.00378					134	3777.59	95.08	17.4445	0.06955	17.375
135	3843.25	96.73	9.7149	0.06664	9.64826					135	3934.01	99.02	17.4275	0.07002	17.3574
136	3850.19	96.91	9.96147	0.02224	9.93923					136	3956.63	99.59	17.4145	0.06944	17.3451
137	3914	98.51	10.3315	0.07012	10.2614					137	3963.77	99.77	17.3861	0.07158	17.3145
138	3823	96.22	9.64521	0.06982	9.57539					138	3961.12	99.7	17.4249	0.00077	17.4242
139	3943.73	99.26	8.62023	0.0703	8.54993					139	3813.28	95.98	17.2869	0.07164	17.2153
140	3889.78	97.91	9.18721	0.06784	9.11937					140	3879.89	97.66	17.4413	0.07232	17.369
141	3972.67	99.99	10.3044	0.02237	10.282					141	3949.41	99.41	17.4064	0.00101	17.4054
142	3946.13	99.32	9.61106	0.07162	9.53944					142	3954.9	99.54	17.388	0.00033	17.3877
143	3912.53	98.48	10.5447	0.07223	10.4724					143	3818.95	96.12	17.4022	0.07064	17.3316
144	3908.39	98.37	8.84865	0.07187	8.77678					144	3949.41	99.41	17.425	0.00018	17.4248
145	3866.44	97.32	8.85762	0.07169	8.78593					145	3912.89	98.49	17.391	8e-05	17.3909
146	3967.84	99.87	6.00232	0.07234	5.92998					146	3943.03	99.25	17.3398	0.06916	17.2706
147	3700.89	93.15	8.13274	0.07361	8.05913					147	3945.61	99.31	17.0838	0.07123	17.0125
148	3865.48	97.29	9.48379	0.07148	9.41231					148	3970.95	99.95	17.4417	0.06867	17.3731
149	3918.21	98.62	8.08334	0.07216	8.01118					149	3901.67	98.2	17.3325	0.06926	17.2633
150	3966.24	99.83	6.22491	0.07001	6.1549					150	3830.87	96.42	17.4394	0.07303	17.3663
151	3879.95	97.66	9.83789	0.07104	9.76685					151	3925.45	98.8	17.4103	0.07193	17.3384
152	3915.56	98.55	9.40521	0.074	9.33121					152	3906.7	98.33	17.3511	0.0698	17.2812
153	3906.32	98.32	10.1197	0.07035	10.0493					153	3960.21	99.68	17.4193	0.0719	17.3474
154	3963.3	99.76	10.7526	0.02343	10.7292					154	3969.76	99.92	17.4002	0.0003	17.4
155	3888.97	97.88	9.04167	0.05807	8.9836					155	3959.57	99.66	17.3689	0.00778	17.3612
156	3941.74	99.21	8.34218	0.06965	8.27253					156	3973.01	100	17.4257	0	17.4257
157	3910.57	98.43	8.68382	0.07317	8.61065					157	3957.3	99.6	17.3712	0.07061	17.3006
158	3933.2	99	10.2331	0.06983	10.1632					158	3927	98.84	17.4146	0.06956	17.3451
159	3926.48	98.83	7.93738	0.06893	7.86845					159	3962.98	99.75	17.4195	0.00184	17.4177
160	3970.09	99.93	10.3185	0.06919	10.2493					160	3921.31	98.7	17.4077	0.07083	17.3369
161	3965.27	99.81	6.59637	0.07336	6.52301					161	3894.43	98.02	17.4064	0.07194	17.3345
162	3902.7	98.23	8.8271	0.07019	8.75691					162	3942.94	99.24	17.4132	0.00021	17.413
163	3939.41	99.15	4.38803	0.06935	4.31868					163	3797.9	95.59	17.4422	0.07193	17.3702
164	3968.47	99.89	7.34119	0.06854	7.27265					164	3963.3	99.76	17.4052	0.00126	17.404
165	3959.1	99.65	7.45957	0.07206	7.38751					165	3929.59	98.91	17.4178	0.07406	17.3438
166	3717.53	93.57	10.1968	0.07095	10.1259					166	3929.37	98.9	17.2939	7e-05	17.2938
167	3951.69	99.46	9.48097	0.07455	9.40642					167	3883.8	97.75	17.4336	0.00013	17.4335
168	3963.19	99.75	8.08295	0.06961	8.01334					168	3949.75	99.41	17.4316	0.00045	17.4311
169	3904.49	98.28	8.93489	0.04	8.89489					169	3966.88	99.85	17.4382	0.06873	17.3695
170	3962.16	99.73	7.56909	0.07123	7.49786					170	3899.13	98.14	17.4056	0.07118	17.3345
171	3937.45	99.1	8.93383	0.0722	8.86163					171	3926.14	98.82	17.3937	0.00037	17.3933
172	3943.03	99.25	9.07477	0.07089	9.00388					172	3956.63	99.59	17.4074	0.07015	17.3373
173	3962.16	99.73	7.47865	0.06766	7.41099					173	3892.35	97.97	17.399	0.07222	17.3268
174	3969.44	99.91	6.85118	0.07011	6.78107					174	3918.8	98.64	17.4112	0.07478	17.3364
175	3930.75	98.94	8.5043	0.07179	8.43251					175	3884.09	97.76	17.3882	0.071	17.3172
176	3942.09	99.22	9.63891	0.07338	9.56553					176	3953.86	99.52	17.4078	0.07014	17.3377
177	3966.86	99.85	8.10796	0.07026	8.0377					177	3922.62	98.73	17.4284	0.06683	17.3616
178	3870.66	97.42	8.5572	0.0745	8.4827					178	3895.1	98.04	17.4086	0.07225	17.3363
179	3939.93	99.17	9.20495	0.07323	9.13172					179	3925.81	98.81	17.4338	0.00016	17.4336
180	3624.33	91.22	10.5977	0.06944	10.5282					180	3965.26	99.8	17.4197	0.00034	17.4194
181	3929.07	98.89	7.6465	0.07051	7.57599					181	3924.43	98.78	17.4367	0.0729	17.3638
182	3957.95	99.62	7.44908	0.07073	7.37835					182	3970.95	99.95	17.4313	0.00056	17.4307
183	3968.36	99.88	10.1156	0.00102	10.1145					183	3966.03	99.82	17.4246	0.07267	17.352
184	3937.12	99.1	6.31443	0.07114	6.24329					184	3955.22	99.55	17.4313	0.00016	17.4312
185	3971.98	99.97	10.3083	0.0415	10.2668					185	3952.33	99.48	17.1484	0.0722	17.0762
186	3925.58	98.81	9.81728	0.07298	9.7443					186	3949.75	99.41	17.4174	0.07126	17.3461
187	3827.22	96.33	10.0565	0.06758	9.98895					187	3931.75	98.96	17.4215	0.07533	17.3461
188	3966.86	99.85	6.94127	0.07057	6.8707					188	3931.14	98.95	17.4003	0.06982	17.3305
189	3924.22	98.77	9.7745	0.07103	9.70347					189	3863.41	97.24	17.434	0.06861	17.3654
190	3971.85	99.97	9.09257	0.07379	9.01878					190	3947.79	99.37	17.4428	0.00033	17.4424
191	3958.6	99.64	8.38475	0.07056	8.31419					191	3945.35	99.3	17.2652	0.07	17.1952
192	3932.05	98.97	6.46081	0.07135	6.38946					192	3967.33	99.86	17.419	0.00023	17.4188
193	3967.82	99.87	9.918	0.03695	9.88105					193	3969.26	99.91	17.4191	0.07148	17.3476
194	3882.02	97.71	8.98552	0.07202	8.9135					194	3922.35	98.72	17.4317	0.07128	17.3604
195	3955.36	99.56	10.5563	0.07378	10.4825					195	3969.12	99.9	17.4301	0.00072	17.4294
196	3926.46	98.83	10.7284	0.03655	10.6918					196	3971.06	99.95	17.3378	0.00232	17.3354
197	3961.36	99.71	8.01424	0.07274	7.9415					197	3830.77	96.42	17.25	0.07278	17.1772
198	3900.93	98.19	7.48686	0.05882	7.42804					198	3870.54	97.42	17.2863	0.0698	17.2165
199	3895.78	98.06	8.56278	0.07351	8.48927					199	3906.85	98.33	17.4343	0.07174	17.3625
200	3946.64	99.34	7.14053	0.06706	7.07347					200	3939.41	99.15	17.4184	0.0036	17.4148

[truncated: 1 more sheets: 10_EACO_Seeds(25)]
