# Supplementary material for: Enhanced Hyper-Cube Framework Aco for Combinatorial Optimization Problems
Source: Preprints.org preprint supplement (doi:10.20944/preprints202108.0573.v1), 2021-08-31
Supplement: Supplementary file 6 [file 03_RBACO_@_Seeds(75)_Exp.xlsx]

## Sheet: 03_RBACO_@_Seeds(75)_Fast
Slow Convergence										Slow Convergenece
ige	Fbest(ige)	Fworst(ige)	Fmean(ige)	BWLocalDis	GlobalDis	Segma	MaxTau	MinTau		Expeirement no.(Iexp) =	155
1	3921.83	2179.69	2901.29	11	2	1	0.0743	0.0743		Seeds=	75
2	3953.37	2383.02	3736.76	4	1	1	0.1273	0.1273		Number of variables =	16
3	3953.37	2988.4	3768.2	5	1	5	0.6476	0.6476		no. of Ants =	25
4	3972.5	3921.83	3951.22	2	0	1	0.6527	0.6527		Maximum CBLF(fopt) =	3972.5
5	3972.5	3782.24	3942.14	2	0	1	0.6563	0.6563		Optimal Solution(xopt) =	333332322222223
6	3972.5	3532.25	3934.83	2	0	4	0.9397	0.9397		Number of Practical Optima =	1
7	3972.5	3885.12	3955.83	1	0	11	3.3777	3.3777		no. of Iterations(ige) =	14
8	3972.5	3940.96	3968.18	1	0	20	11.2435	11.2435		1st Global optima Found @ ige =	4
9	3972.5	3953.37	3971.73	1	0	24	21.8778	21.8778		Minimum Best Solution =	3921.83
10	3972.5	3644.39	3959.37	1	0	24	31.4271	31.4271		Mean of Best Solution =	3966.15
11	3972.5	3972.5	3972.5	0	0	25	41.0344	41.0344		SD of Best Solution =	14.5019
12	3972.5	3972.5	3972.5	0	0	25	49.681	49.681		Fitness Distance Correlation =	-8.1558
13	3972.5	3972.5	3972.5	0	0	25	57.4629	57.4629		Correlation Coefficent =	-0.92007
14	3972.5	3972.5	3972.5	0	0	25	64.4666	64.4666		Elapsed Time =	2.4664

## Sheet: 03_RBACO_@_Seeds(75)_Slow
Slow Convergence										Slow Convergenece
ige	Fbest(ige)	Fworst(ige)	Fmean(ige)	BWLocalDis	GlobalDis	Segma	MaxTau	MinTau		Expeirement no.(Iexp) =	164
1	3536.99	1436.84	2825.74	11	6	1	0.0659	0.0659		Seeds=	75
2	3665.79	3061.15	3465.78	5	4	1	0.1266	0.1266		Number of variables =	16
3	3737.55	3496.45	3593.45	4	3	1	0.1836	0.1836		no. of Ants =	25
4	3741.07	3441.6	3639.55	2	3	1	0.234	0.234		Maximum CBLF(fopt) =	3973.01
5	3743.34	3489.02	3658.18	3	2	1	0.2795	0.2795		Optimal Solution(xopt) =	233332333333333
6	3920.59	3196.63	3658.8	4	2	1	0.3189	0.3189		Number of Practical Optima =	1
7	3920.59	3534.86	3714.29	2	2	1	0.3562	0.3562		no. of Iterations(ige) =	66
8	3922.86	3612.78	3765.2	3	1	1	0.3899	0.3899		1st Global optima Found @ ige =	10
9	3971.06	3599.74	3794.81	5	1	1	0.42	0.3509		Minimum Best Solution =	3536.99
10	3973.01	3398.58	3835.96	3	0	1	0.4451	0.3158		Mean of Best Solution =	3948.81
11	3973.01	3557.13	3820.99	3	0	3	0.6059	0.2843		SD of Best Solution =	79.9859
12	3973.01	3718.52	3914.73	2	0	8	1.9066	0.2558		Fitness Distance Correlation =	-81.6298
13	3973.01	3845.02	3962.65	1	0	19	9.1254	0.2302		Correlation Coefficent =	-0.94836
14	3973.01	3922.86	3968.92	1	0	22	18.1141	0.2072		Elapsed Time =	2.4664
15	3973.01	3973.01	3973.01	0	0	25	29.0527	0.1865
16	3973.01	3973.01	3973.01	0	0	25	38.8974	0.1678
17	3973.01	3973.01	3973.01	0	0	25	47.7577	0.1511
18	3973.01	3973.01	3973.01	0	0	25	55.7319	0.136
19	3973.01	3973.01	3973.01	0	0	25	62.9087	0.1224
20	3973.01	3973.01	3973.01	0	0	25	69.3678	0.1101
21	3973.01	3898.04	3970.01	1	0	24	74.2258	0.0991
22	3973.01	3973.01	3973.01	0	0	25	79.5532	0.0892
23	3973.01	3973.01	3973.01	0	0	25	84.3479	0.0803
24	3973.01	3973.01	3973.01	0	0	25	88.6631	0.0723
25	3973.01	3973.01	3973.01	0	0	25	92.5468	0.065
26	3973.01	3973.01	3973.01	0	0	25	96.0421	0.0585
27	3973.01	3973.01	3973.01	0	0	25	99.1879	0.0527
28	3973.01	3973.01	3973.01	0	0	25	102.019	0.0474
29	3973.01	3973.01	3973.01	0	0	25	104.567	0.0427
30	3973.01	3973.01	3973.01	0	0	25	106.861	0.0384
31	3973.01	3973.01	3973.01	0	0	25	108.924	0.0346
32	3973.01	3973.01	3973.01	0	0	25	110.782	0.0311
33	3973.01	3973.01	3973.01	0	0	25	112.454	0.028
34	3973.01	3973.01	3973.01	0	0	25	113.958	0.0252
35	3973.01	3973.01	3973.01	0	0	25	115.313	0.0227
36	3973.01	3973.01	3973.01	0	0	25	116.531	0.0204
37	3973.01	3973.01	3973.01	0	0	25	117.628	0.0184
38	3973.01	3973.01	3973.01	0	0	25	118.615	0.0165
39	3973.01	3973.01	3973.01	0	0	25	119.504	0.0149
40	3973.01	3973.01	3973.01	0	0	25	120.303	0.0134
41	3973.01	3973.01	3973.01	0	0	25	121.023	0.012
42	3973.01	3973.01	3973.01	0	0	25	121.671	0.0108
43	3973.01	3973.01	3973.01	0	0	25	122.254	0.0098
44	3973.01	3973.01	3973.01	0	0	25	122.778	0.0088
45	3973.01	3973.01	3973.01	0	0	25	123.251	0.0079
46	3973.01	3973.01	3973.01	0	0	25	123.675	0.0071
47	3973.01	3973.01	3973.01	0	0	25	124.058	0.0064
48	3973.01	3973.01	3973.01	0	0	25	124.402	0.0058
49	3973.01	3973.01	3973.01	0	0	25	124.712	0.0052
50	3973.01	3973.01	3973.01	0	0	25	124.991	0.0047
51	3973.01	3973.01	3973.01	0	0	25	125.242	0.0042
52	3973.01	3973.01	3973.01	0	0	25	125.468	0.0038
53	3973.01	3973.01	3973.01	0	0	25	125.671	0.0034
54	3973.01	3973.01	3973.01	0	0	25	125.854	0.0031
55	3973.01	3973.01	3973.01	0	0	25	126.018	0.0028
56	3973.01	3973.01	3973.01	0	0	25	126.166	0.0025
57	3973.01	3973.01	3973.01	0	0	25	126.3	0.0022
58	3973.01	3973.01	3973.01	0	0	25	126.42	0.002
59	3973.01	3973.01	3973.01	0	0	25	126.528	0.0018
60	3973.01	3973.01	3973.01	0	0	25	126.625	0.0016
61	3973.01	3973.01	3973.01	0	0	25	126.713	0.0015
62	3973.01	3973.01	3973.01	0	0	25	126.791	0.0013
63	3973.01	3973.01	3973.01	0	0	25	126.862	0.0012
64	3973.01	3973.01	3973.01	0	0	25	126.926	0.0011
65	3973.01	3973.01	3973.01	0	0	25	126.983	0.001
66	3973.01	3973.01	3973.01	0	0	25	127.035	0.0009
