# Supplementary material for: Enhanced Hyper-Cube Framework Aco for Combinatorial Optimization Problems
Source: Preprints.org preprint supplement (doi:10.20944/preprints202108.0573.v1), 2021-08-31
Supplement: Supplementary file 8 [file 04_MMACO_@_Seeds(75)_Exp.xlsx]

## Sheet: 04_MMACO_@_Seeds(75)_Fast
Slow Convergence										Slow Convergenece
ige	Fbest(ige)	Fworst(ige)	Fmean(ige)	BWLocalDis	GlobalDis	Segma	MaxTau	MinTau		Expeirement no.(Iexp) =	71
1	3567.69	1991.94	2822.69	10	10	1	0.6204	0.0069		Seeds =	75
2	3636.16	1973.49	2637.46	12	8	1	0.603	0.0067		Number of variables =	16
3	3636.16	1811.95	2651.03	10	8	1	0.5537	0.0061		no. of Ants =	25
4	3783.28	1853.32	2830.43	12	7	1	0.5443	0.006		Maximum CBLF(fopt) =	3973.01
5	3783.28	1352.95	2741.57	13	7	1	0.3973	0.0044		Optimal Solution(xopt) =	2 3 3 3 3 3 2 3 3 3 3 2 3 3 3 3
6	3783.28	2409.09	2844.01	15	7	1	0.7075	0.0078		Number of Practical Optima =	1
7	3783.28	1775.85	2656.05	14	7	1	0.5215	0.0058		no. of Iterations(ige) =	52
8	3783.28	2360.63	2759.58	11	7	1	0.6933	0.0077		1st Global optima Found @ ige =	42
9	3783.28	1612.66	2743.98	13	7	1	0.4736	0.0052		Minimum Best Solution =	3567.69
10	3783.28	2154.64	2806.84	12	7	1	0.6328	0.007		Mean of Best Solution =	3891.18
11	3783.28	2241.49	2766.45	10	7	1	0.6583	0.0073		SD of Best Solution =	99.4884
12	3783.28	2240.68	2925.71	13	7	1	0.6581	0.0073		Fitness Distance Correlation =	-222.667
13	3842.73	2084.3	2825.91	13	4	1	0.6027	0.0067		Correlation Coefficent =	-0.77693
14	3842.73	1609.33	2711.49	12	4	1	0.4653	0.0052		Elapsed Time =	2.4664
15	3842.73	1683.17	2698.88	9	4	1	0.4867	0.0054
16	3842.73	1798.46	2767.26	9	4	1	0.52	0.0058
17	3842.73	1886.3	2871.68	9	4	1	0.5454	0.006
18	3842.73	2096.5	2824.53	11	4	1	0.6062	0.0067
19	3842.73	1990.42	2957.34	9	4	1	0.5755	0.0064
20	3933.2	1746.23	2949.5	14	6	1	0.4933	0.0055
21	3933.2	1717.16	2793.67	14	6	1	0.4851	0.0054
22	3933.2	1752.21	2939.19	13	6	1	0.495	0.0055
23	3933.2	1687.38	2845.57	11	6	1	0.4767	0.0053
24	3933.2	1975.68	3066.25	9	6	1	0.5581	0.0062
25	3933.2	2646.91	3265.46	11	6	1	0.7477	0.0083
26	3933.2	1843.47	3050.66	13	6	1	0.5208	0.0058
27	3933.2	2559.75	3289.7	8	6	1	0.7231	0.008
28	3933.2	2480.52	3318.74	10	6	1	0.7007	0.0078
29	3941.48	2912.97	3500.16	5	2	1	0.8212	0.0091
30	3941.48	2566.55	3354.42	9	2	1	0.7235	0.008
31	3941.48	2276.6	3258.88	9	2	1	0.6418	0.0071
32	3941.48	2801.56	3465.47	7	2	1	0.7898	0.0087
33	3960.56	2731.4	3547.62	8	3	1	0.7663	0.0085
34	3960.56	2901.05	3583.28	9	3	1	0.8139	0.009
35	3960.56	2739.54	3439.58	11	3	1	0.7686	0.0085
36	3960.56	2900.82	3635.11	5	3	1	0.8138	0.009
37	3967.53	3190.37	3582.83	5	1	1	0.8935	0.0099
38	3967.53	3064.57	3632.88	6	1	1	0.8582	0.0095
39	3967.53	3231.07	3668.79	8	1	1	0.9049	0.01
40	3967.53	3364.61	3715.25	6	1	1	0.9423	0.0104
41	3972.49	2985.55	3694.08	7	1	1	0.8351	0.0092
42	3973.01	3572.96	3820.02	3	0	1	0.9992	0.0111
43	3973.01	2843.47	3791.47	5	0	1	0.7952	0.0088
44	3973.01	3451.83	3812.5	4	0	1	0.9654	0.0107
45	3973.01	3495.35	3873.12	5	0	1	0.9775	0.0108
46	3973.01	3160.84	3809.24	5	0	2	0.884	0.0098
47	3973.01	3451.31	3819.98	1	0	4	0.9652	0.0107
48	3973.01	3538.49	3917.09	3	0	11	0.9896	0.011
49	3973.01	3644.89	3949.32	1	0	13	1.0193	0.0113
50	3973.01	3769.4	3952.37	1	0	16	1.0542	0.0117
51	3973.01	3769.4	3950.6	1	0	18	1.0542	0.0117
52	3973.01	3821.76	3965.51	1	0	21	1.0688	0.0118

## Sheet: 04_MMACO_@_Seeds(75)_Slow
Slow Convergence										Slow Convergenece
ige	Fbest(ige)	Fworst(ige)	Fmean(ige)	BWLocalDis	GlobalDis	Segma	MaxTau	MinTau		Expeirement no.(Iexp) =	3
1	3488.88	1970.73	2809.87	13	9	1	0.6276	0.0069		Seeds =	75
2	3488.88	2166.21	2820.13	11	9	1	0.6899	0.0076		Number of variables =	16
3	3632.93	1815.6	2615.46	10	7	1	0.5553	0.0061		no. of Ants =	25
4	3632.93	2161.28	2880.88	9	7	1	0.661	0.0073		Maximum CBLF(fopt) =	3973.01
5	3632.93	1408.53	2749.3	12	7	1	0.4308	0.0048		Optimal Solution(xopt) =	233333233332333
6	3662.66	1832.75	2808.63	12	8	1	0.556	0.0062		Number of Practical Optima =	103
7	3662.66	2222.72	2940.59	10	8	1	0.6743	0.0075		no. of Iterations(ige) =	47
8	3662.66	1441.87	2622.99	14	8	1	0.4374	0.0048		1st Global optima Found @ ige =	3488.88
9	3813.78	1175.54	2574.61	14	10	1	0.3425	0.0038		Minimum Best Solution =	3919.22
10	3813.78	1757.57	2656.57	11	10	1	0.5121	0.0057		Mean of Best Solution =	105.556
11	3813.78	2135.58	2675.15	11	10	1	0.6222	0.0069		SD of Best Solution =	-288.89
12	3813.78	1645.22	2648.54	8	10	1	0.4793	0.0053		Fitness Distance Correlation =	-0.69681
13	3813.78	1687.81	2671.45	12	10	1	0.4917	0.0054		Correlation Coefficent =	4.8132
14	3813.78	1894.57	2911.54	13	10	1	0.552	0.0061		Elapsed Time =	2.4664
15	3813.78	1836.52	2677.81	9	10	1	0.5351	0.0059
16	3846.14	2102.19	2948.9	12	11	1	0.6073	0.0067
17	3846.14	2048.07	3026.62	12	11	1	0.5917	0.0065
18	3846.14	1874.21	2851.23	10	11	1	0.5414	0.006
19	3855.64	2091.57	2920.51	11	8	1	0.6027	0.0067
20	3855.64	2051.18	2918.73	11	8	1	0.5911	0.0065
21	3855.64	2285.38	3109.64	13	8	1	0.6586	0.0073
22	3855.64	2091.43	2976.09	11	8	1	0.6027	0.0067
23	3855.64	2324	2940.3	10	8	1	0.6697	0.0074
24	3855.64	2896.4	3283.02	12	8	1	0.8347	0.0092
25	3861.3	2106.74	3144.61	10	11	1	0.6062	0.0067
26	3921.31	2342.35	3291.89	9	6	1	0.6637	0.0073
27	3941.35	2723.42	3364.41	12	6	1	0.7678	0.0085
28	3941.35	2834.78	3328.01	9	6	1	0.7992	0.0088
29	3941.35	2523.59	3214.25	8	6	1	0.7114	0.0079
30	3941.35	2863.49	3220.58	12	6	1	0.8072	0.0089
31	3941.35	2815.47	3463	8	6	1	0.7937	0.0088
32	3947.14	2530.41	3490.62	11	5	1	0.7123	0.0079
33	3962.77	2503.75	3449.59	10	5	1	0.702	0.0078
34	3962.77	2998	3614.01	10	5	1	0.8406	0.0093
35	3962.77	2973.49	3590.22	10	5	1	0.8337	0.0092
36	3962.77	2761.49	3553.74	9	5	1	0.7743	0.0086
37	3962.77	2757.16	3592.61	11	5	1	0.7731	0.0086
38	3970.09	3006.89	3613.95	7	6	1	0.8415	0.0093
39	3970.09	2874.49	3678.53	11	6	1	0.8045	0.0089
40	3970.09	3186.81	3631.83	8	6	1	0.8919	0.0099
41	3970.09	2969.5	3648.36	6	6	1	0.8311	0.0092
42	3970.73	3418.99	3757.73	7	2	1	0.9567	0.0106
43	3970.73	3190.05	3716.18	8	2	1	0.8927	0.0099
44	3970.73	3169.7	3698.79	7	2	1	0.887	0.0098
45	3970.73	3116.6	3689.35	8	2	1	0.8721	0.0097
46	3970.73	3195.09	3705.96	4	2	1	0.8941	0.0099
47	3973.01	3214.75	3773.55	7	0	1	0.8991	0.01
48	3973.01	3539.11	3829.29	6	0	2	0.9898	0.011
49	3973.01	3498.41	3798	7	0	1	0.9784	0.0108
50	3973.01	3368.9	3838.18	4	0	2	0.9422	0.0104
51	3973.01	3260.12	3788.98	4	0	2	0.9117	0.0101
52	3973.01	3577.86	3903.23	4	0	4	1.0006	0.0111
53	3973.01	3600.26	3909.29	1	0	7	1.0069	0.0111
54	3973.01	3600.26	3901.22	1	0	10	1.0069	0.0111
55	3973.01	3600.26	3926.27	2	0	13	1.0069	0.0111
56	3973.01	3603.88	3949.95	3	0	17	1.0079	0.0112
57	3973.01	3600.78	3929.61	2	0	20	1.007	0.0111
58	3973.01	3941.48	3971.59	1	0	19	1.1023	0.0122
59	3973.01	3600.26	3949.4	1	0	20	1.0069	0.0111
60	3973.01	3600.26	3936.97	1	0	17	1.0069	0.0111
61	3973.01	3971.06	3972.86	1	0	23	1.1106	0.0123
62	3973.01	3451.31	3949.6	1	0	20	0.9652	0.0107
63	3973.01	3600.26	3951.12	1	0	18	1.0069	0.0111
64	3973.01	3600.26	3940.63	1	0	18	1.0069	0.0111
65	3973.01	3647.31	3950.05	2	0	20	1.02	0.0113
66	3973.01	3600.26	3958.1	1	0	24	1.0069	0.0111
67	3973.01	3971.06	3972.93	1	0	21	1.1106	0.0123
68	3973.01	3868.26	3967.66	1	0	23	1.0818	0.012
69	3973.01	3600.26	3956.47	1	0	23	1.0069	0.0111
70	3973.01	3943.91	3971.3	1	0	21	1.103	0.0122
71	3973.01	3973	3973.01	1	0	24	1.1111	0.0123
72	3973.01	3941.48	3971.75	1	0	24	1.1023	0.0122
73	3973.01	3973.01	3973.01	0	0	25	1.1111	0.0123
74	3973.01	3941.48	3971.75	1	0	24	1.1023	0.0122
75	3973.01	3941.48	3971.75	1	0	24	1.1023	0.0122
76	3973.01	3600.26	3948.33	1	0	22	1.0069	0.0111
77	3973.01	3943.91	3971.85	1	0	24	1.103	0.0122
78	3973.01	3961.36	3972.55	1	0	24	1.1079	0.0123
79	3973.01	3973.01	3973.01	0	0	25	1.1111	0.0123
80	3973.01	3973	3973.01	1	0	24	1.1111	0.0123
81	3973.01	3971.06	3972.93	1	0	24	1.1106	0.0123
82	3973.01	3961.36	3972.55	1	0	23	1.1079	0.0123
83	3973.01	3973.01	3973.01	0	0	25	1.1111	0.0123
84	3973.01	3973.01	3973.01	0	0	25	1.1111	0.0123
85	3973.01	3973.01	3973.01	0	0	25	1.1111	0.0123
86	3973.01	3973.01	3973.01	0	0	25	1.1111	0.0123
87	3973.01	3973.01	3973.01	0	0	25	1.1111	0.0123
88	3973.01	3961.36	3972.55	1	0	24	1.1079	0.0123
89	3973.01	3973	3973.01	1	0	24	1.1111	0.0123
90	3973.01	3868.26	3968.82	1	0	24	1.0818	0.012
91	3973.01	3961.36	3972.55	1	0	23	1.1079	0.0123
92	3973.01	3973.01	3973.01	0	0	25	1.1111	0.0123
93	3973.01	3973.01	3973.01	0	0	25	1.1111	0.0123
94	3973.01	3973.01	3973.01	0	0	25	1.1111	0.0123
95	3973.01	3973.01	3973.01	0	0	25	1.1111	0.0123
96	3973.01	3973.01	3973.01	0	0	25	1.1111	0.0123
97	3973.01	3973.01	3973.01	0	0	25	1.1111	0.0123
98	3973.01	3973.01	3973.01	0	0	25	1.1111	0.0123
99	3973.01	3451.31	3939.02	1	0	23	0.9652	0.0107
100	3973.01	3973.01	3973.01	0	0	25	1.1111	0.0123
101	3973.01	3973.01	3973.01	0	0	25	1.1111	0.0123
102	3973.01	3973.01	3973.01	0	0	25	1.1111	0.0123
103	3973.01	3973.01	3973.01	0	0	25	1.1111	0.0123
