# Supplementary material for: Enhanced Hyper-Cube Framework Aco for Combinatorial Optimization Problems
Source: Preprints.org preprint supplement (doi:10.20944/preprints202108.0573.v1), 2021-08-31
Supplement: Supplementary file 9 [file 04_MMACO_Seeds_Results.xlsx]

## Sheet: 00_Index
		Global optimal solution		Relaibility (%)		Normalized Price (iteration)		Correlation Coefficent		Performance rate		Elapsed time (Sec)		Solution Quality
		Fast convergence	Slow Convergence	Fast convergence	Slow Convergence	Fast convergence	Slow Convergence	Fast convergence	Slow Convergence	Fast convergence	Slow Convergence	Fast convergence	Slow Convergence	Fast convergence	Slow Convergence
	Seed (301)	3973.01	3973.01	18.5	90	131.189	110.9	-1	-0.82019	0.0076226	0.0090171	1.1439	4.5399	98.2414	99.9622
	Seed (2)	3973.01	3973.01	17.5	80	144.543	125.656	-1	-0.83431	0.0069184	0.0079582	1.1807	4.5794	98.4226	99.9457
	Seed (50)	3973.01	3973.01	19.5	87.5	127.18	109.94	-1	-0.8206	0.0078629	0.0090959	1.1578	4.6206	98.2754	99.9636
	Seed (75)	3973.01	3973.01	15.5	87.5	157.129	157.129	-1	-0.82489	0.0063642	0.0086599	1.1508	4.731	98.3104	99.9597
	Seed (111)	3973	3973.01	14	91	157.25	109.39	-1	-0.81762	0.0063593	0.0091416	1.0335	4.5421	98.1633	99.9655
	Seed (200)	3973.01	3973.01	16	89.5	153.562	112.603	-1	-0.82717	0.006512	0.0088807	1.1842	4.5905	98.2556	99.9619
	Seed (167)	3973.01	3973.01	12.5	88.5	193.56	114.633	-1	-0.81784	0.005941	0.0087235	1.1332	4.6787	98.3615	99.9604
	Seed (225)	3973.01	3973.01	14	89.5	168.321	112.726	-1	-0.81309	0.0062339	0.008871	1.1015	4.6451	98.2651	99.9657
	Seed (11)	3973.01	3973.01	14.5	88.5	160.414	113.893	-1	-0.80891	0.0062339	0.0087802	1.0887	4.7068	98.2131	99.9622
	Seed (25)	3973.01	3973.01	18	85	129.167	118.424	-1	-0.81618	0.0077419	0.0084443	1.0887	4.5875	98.2574	99.9573
			Fast Convergence						Slow Convergence
			Relaibility (%)	Normalized Price (iteration)	Correlation Coefficent	Performance Rate	Elapsed time (sec)		Relaibility (%)	Normalized Price (iteration)	Correlation Coefficent	Performance Rate	Elapsed time (sec)
		Min.	12.5	127.18	-1	0.005941	1.0335	Min.	80	109.39	-0.83431	0.0079582	4.5399
		Max.	19.5	193.56	-1	0.0078629	1.1842	Max.	91	157.129	-0.80891	0.0091416	4.731
		Mean	16	152.232	-1	0.00677901	1.1263	Mean	87.7	118.529	-0.82008	0.00875724	4.62216
		Median	15.75	155.346	-1	0.0064381	1.13855	Median	88.5	113.309	-0.819015	0.0088256	4.60555
		Standrad division	2.17945	19.3554	0	0.000674471	0.0450733	Standrad division	3.00998	13.6445	0.00689991	0.000332516	0.0632012
			Solution Quality
			Fast Conv.	Slow Conv.
		Min.	98.1633	99.9457
		Max.	98.4226	99.9657
		Mean	98.2766	99.9604
		Median	98.2613	99.9621
		Standrad division	0.0697982	0.00547043

## Sheet: 01_MMACO_Seeds(301)
Fast Converegnce Exp							Fast Converegnce Exp			Slow Converegnce Exp							Slow Converegnce Exp
#	CBLF	Quality	Taumax	Taumin	DeltaTauminmax		Global Optimal Solution =	3973.01		#	CBLF	Quality	Taumax	Taumin	DeltaTauminmax		Global Optimal Solution =	3973.01
1	3941.33	99.2	0.8159	0.0049	0.811		Minimum Optimal Solution =	3640.57		1	3969.39	99.91	1.11111	0.0049	1.10621		Minimum Optimal Solution =	3959.42
2	3881.28	97.69	0.6546	0.00519	0.64941		Mean of Optimal Solution =	3903.14		2	3973	100	1.11111	0.00468	1.10643		Mean of Optimal Solution =	3971.51
3	3878.89	97.63	0.65293	0.00577	0.64716		Median of Optimal Solution =	3903.14		3	3971.98	99.97	1.11111	0.00502	1.10609		Median of Optimal Solution =	3971.51
4	3971.06	99.95	0.93223	0.00415	0.92808		Solution Standrad Deviation =	64.0208		4	3972.5	99.99	1.11111	0.00417	1.10694		Solution Standrad Deviation =	2.1153
5	3972.67	99.99	1.1056	0.0046	1.101		Average Price =	24.27		5	3973.01	100	1.11111	0.00518	1.10593		Average Price =	99.81
6	3857.83	97.1	0.67394	0.00465	0.66929		Relability =	18.5		6	3973	100	1.11111	0.00397	1.10714		Relability =	90
7	3970.95	99.95	0.95441	0.00472	0.94969		Normalized Price =	131.189		7	3972.03	99.98	1.11111	0.00473	1.10638		Normalized Price =	110.9
8	3798.92	95.62	0.63929	0.00502	0.63427		Average Solution Quality =	98.2414		8	3972.5	99.99	1.11111	0.00442	1.10669		Average Solution Quality =	99.9622
9	3908.39	98.37	0.68929	0.00467	0.68462		Average FDC =	-271.599		9	3972.5	99.99	1.11111	0.00498	1.10613		Average FDC =	-164.467
10	3879.24	97.64	0.6707	0.00397	0.66673		Correlation Coefficent =	-1		10	3966.86	99.85	1.11111	0.00468	1.10643		Correlation Coefficent =	-0.82019
11	3906.34	98.32	0.64386	0.00385	0.64001		Solution Robustness =	60.9668		11	3971.98	99.97	1.11111	0.00545	1.10566		Solution Robustness =	1877.55
12	3840.46	96.66	0.7596	0.00403	0.75557		Performance Rate =	0.0076226		12	3971.98	99.97	1.11111	0.00488	1.10623		Performance Rate =	0.0090171
13	3889.68	97.9	0.72791	0.00385	0.72406		Average Elapsed Time =	1.1439		13	3972.67	99.99	1.11111	0.00499	1.10612		Average Elapsed Time =	4.5399
14	3640.57	91.63	0.67581	0.00438	0.67143					14	3972.67	99.99	1.11111	0.0049	1.10621
15	3972.67	99.99	1.05345	0.0049	1.04855					15	3971.06	99.95	1.11111	0.00517	1.10594
16	3970.09	99.93	0.93082	0.00541	0.92541					16	3973	100	1.11111	0.00401	1.1071
17	3725.25	93.76	0.73602	0.00445	0.73157					17	3970.41	99.93	1.11111	0.00424	1.10687
18	3710.91	93.4	0.79442	0.00457	0.78985					18	3972.67	99.99	1.11111	0.00328	1.10783
19	3847.64	96.84	0.66231	0.0049	0.65741					19	3968.88	99.9	1.11111	0.00482	1.10629
20	3972.35	99.98	1.11012	0.00488	1.10524					20	3972.67	99.99	1.11111	0.00464	1.10647
21	3972.67	99.99	1.08012	0.00462	1.0755					21	3972.67	99.99	1.11111	0.00429	1.10682
22	3972.35	99.98	1.08035	0.00471	1.07564					22	3972.35	99.98	1.11111	0.00546	1.10565
23	3833.01	96.48	0.642	0.00437	0.63763					23	3972.5	99.99	1.11111	0.00428	1.10683
24	3973	100	1.01926	0.00539	1.01387					24	3972.67	99.99	1.11111	0.00518	1.10593
25	3874.9	97.53	0.67734	0.00485	0.67249					25	3970.41	99.93	1.11111	0.00489	1.10622
26	3936.82	99.09	0.69761	0.00449	0.69312					26	3971.46	99.96	1.11111	0.00492	1.10619
27	3972.67	99.99	1.06872	0.00456	1.06416					27	3970.41	99.93	1.11111	0.00449	1.10662
28	3971.46	99.96	1.0622	0.00486	1.05734					28	3972.67	99.99	1.11111	0.00459	1.10652
29	3933.57	99.01	0.60622	0.00387	0.60235					29	3972.35	99.98	1.11111	0.00512	1.10599
30	3946.65	99.34	0.63301	0.00474	0.62827					30	3973	100	1.11111	0.00514	1.10597
31	3926.48	98.83	0.67272	0.00513	0.66759					31	3972.67	99.99	1.11111	0.00477	1.10634
32	3927	98.84	0.67348	0.00513	0.66835					32	3963.71	99.77	1.11111	0.00478	1.10633
33	3913.21	98.49	0.62525	0.00542	0.61983					33	3972.67	99.99	1.11111	0.00523	1.10588
34	3885.85	97.81	0.6951	0.0044	0.6907					34	3970.73	99.94	1.11111	0.00486	1.10625
35	3796.41	95.56	0.66253	0.00482	0.65771					35	3971.98	99.97	1.11111	0.00526	1.10585
36	3837.56	96.59	0.66701	0.00509	0.66192					36	3971.46	99.96	1.11111	0.00437	1.10674
37	3939.41	99.15	0.86048	0.0049	0.85558					37	3972.35	99.98	1.11111	0.00434	1.10677
38	3900.61	98.18	0.69656	0.00489	0.69167					38	3970.41	99.93	1.11111	0.00386	1.10725
39	3968.8	99.89	1.03805	0.00477	1.03328					39	3972.67	99.99	1.11111	0.00418	1.10693
40	3909.1	98.39	0.67031	0.00456	0.66575					40	3972.67	99.99	1.11111	0.0047	1.10641
41	3888.11	97.86	0.64746	0.00371	0.64375					41	3968.88	99.9	1.11111	0.00473	1.10638
42	3961.16	99.7	0.83461	0.00442	0.83019					42	3972.5	99.99	1.11111	0.005	1.10611
43	3970.43	99.94	0.94522	0.00461	0.94061					43	3973	100	1.11111	0.0051	1.10601
44	3973	100	0.97477	0.00436	0.97041					44	3972.03	99.98	1.11111	0.00443	1.10668
45	3952.75	99.49	0.6836	0.00531	0.67829					45	3972.67	99.99	1.11111	0.00438	1.10673
46	3902.78	98.23	0.71651	0.00507	0.71144					46	3970.43	99.94	1.11111	0.00464	1.10647
47	3936.31	99.08	0.78625	0.00445	0.7818					47	3972.67	99.99	1.11111	0.00512	1.10599
48	3971.98	99.97	1.10836	0.00477	1.10359					48	3970.73	99.94	1.11111	0.00484	1.10627
49	3885.05	97.79	0.64863	0.00434	0.64429					49	3972.5	99.99	1.11111	0.00529	1.10582
50	3962.45	99.73	0.72146	0.00454	0.71692					50	3969.44	99.91	1.11111	0.00413	1.10698
51	3815.85	96.04	0.72664	0.0054	0.72124					51	3968.88	99.9	1.11111	0.00497	1.10614
52	3815.33	96.03	0.82306	0.00507	0.81799					52	3972.67	99.99	1.11111	0.00415	1.10696
53	3895.21	98.04	0.69783	0.00433	0.6935					53	3962.16	99.73	1.11111	0.00466	1.10645
54	3941.28	99.2	0.64742	0.00474	0.64268					54	3973	100	1.11111	0.00446	1.10665
55	3874.87	97.53	0.70448	0.00529	0.69919					55	3973.01	100	1.11111	0.00368	1.10743
56	3972.5	99.99	1.03484	0.0049	1.02994					56	3971.46	99.96	1.11111	0.00468	1.10643
57	3843.49	96.74	0.72982	0.0054	0.72442					57	3971.46	99.96	1.11111	0.00498	1.10613
58	3972.03	99.98	1.03282	0.00445	1.02837					58	3972.5	99.99	1.11111	0.00534	1.10577
59	3930.1	98.92	0.68196	0.00409	0.67787					59	3965.24	99.8	1.11111	0.0052	1.10591
60	3855.97	97.05	0.69846	0.00578	0.69268					60	3964.92	99.8	1.11111	0.00447	1.10664
61	3891.77	97.96	0.65767	0.00431	0.65336					61	3972.67	99.99	1.11111	0.00475	1.10636
62	3933.89	99.02	0.7238	0.00454	0.71926					62	3973	100	1.11111	0.00428	1.10683
63	3859.4	97.14	0.65867	0.00478	0.65389					63	3971.46	99.96	1.11111	0.00448	1.10663
64	3867.71	97.35	0.69868	0.00471	0.69397					64	3973	100	1.11111	0.00445	1.10666
65	3879.1	97.64	0.66004	0.0033	0.65674					65	3972.35	99.98	1.11111	0.00425	1.10686
66	3971.46	99.96	0.95348	0.00458	0.9489					66	3972.35	99.98	1.11111	0.00409	1.10702
67	3958.27	99.63	0.72514	0.00514	0.72					67	3973.01	100	1.11111	0.00492	1.10619
68	3936.62	99.08	0.70056	0.00433	0.69623					68	3972.35	99.98	1.11111	0.00516	1.10595
69	3911.49	98.45	0.68854	0.00459	0.68395					69	3971.98	99.97	1.11111	0.00446	1.10665
70	3907.54	98.35	0.67471	0.00494	0.66977					70	3972.35	99.98	1.11111	0.00467	1.10644
71	3828.26	96.36	0.67228	0.00515	0.66713					71	3972.5	99.99	1.11111	0.00542	1.10569
72	3958.78	99.64	0.64918	0.00393	0.64525					72	3973.01	100	1.11111	0.00497	1.10614
73	3879.93	97.66	0.65047	0.00503	0.64544					73	3973.01	100	1.11111	0.00465	1.10646
74	3973	100	1.09963	0.00466	1.09497					74	3972.35	99.98	1.11111	0.00499	1.10612
75	3892.88	97.98	0.73354	0.00545	0.72809					75	3973	100	1.11111	0.00494	1.10617
76	3825.89	96.3	0.72779	0.00458	0.72321					76	3973	100	1.11111	0.00409	1.10702
77	3846.73	96.82	0.64855	0.00397	0.64458					77	3972.67	99.99	1.11111	0.00483	1.10628
78	3940.97	99.19	0.81675	0.00453	0.81222					78	3971.98	99.97	1.11111	0.00403	1.10708
79	3912.91	98.49	0.6895	0.00504	0.68446					79	3965.24	99.8	1.11111	0.00375	1.10736
80	3924.73	98.78	0.74347	0.00475	0.73872					80	3972.35	99.98	1.11111	0.0037	1.10741
81	3937.82	99.11	0.64353	0.00507	0.63846					81	3972.35	99.98	1.11111	0.00527	1.10584
82	3942.74	99.24	0.75558	0.00478	0.7508					82	3972.35	99.98	1.11111	0.00385	1.10726
83	3931.14	98.95	0.68787	0.00535	0.68252					83	3969.12	99.9	1.11111	0.0044	1.10671
84	3938.89	99.14	0.74264	0.00472	0.73792					84	3973	100	1.11111	0.00487	1.10624
85	3859.45	97.14	0.68131	0.00475	0.67656					85	3973.01	100	1.11111	0.00466	1.10645
86	3854.05	97.01	0.71085	0.00481	0.70604					86	3972.35	99.98	1.11111	0.0048	1.10631
87	3930.62	98.93	0.69318	0.0048	0.68838					87	3972.67	99.99	1.11111	0.00459	1.10652
88	3898.57	98.13	0.67015	0.00526	0.66489					88	3971.46	99.96	1.11111	0.00504	1.10607
89	3919.76	98.66	0.63855	0.0046	0.63395					89	3973	100	1.11111	0.0048	1.10631
90	3853.07	96.98	0.62475	0.00423	0.62052					90	3970.41	99.93	1.11111	0.00471	1.1064
91	3970.95	99.95	1.08666	0.00447	1.08219					91	3967.84	99.87	1.11111	0.00456	1.10655
92	3964.74	99.79	0.6927	0.00384	0.68886					92	3972.67	99.99	1.11111	0.00412	1.10699
93	3972.35	99.98	1.10671	0.00381	1.1029					93	3971.98	99.97	1.11111	0.0041	1.10701
94	3972.5	99.99	1.01729	0.00444	1.01285					94	3972.67	99.99	1.11111	0.0043	1.10681
95	3972.67	99.99	1.03761	0.00451	1.0331					95	3972.35	99.98	1.11111	0.00457	1.10654
96	3972.5	99.99	0.99268	0.0046	0.98808					96	3972.35	99.98	1.11111	0.0051	1.10601
97	3936.82	99.09	0.73039	0.0049	0.72549					97	3973.01	100	1.11111	0.00466	1.10645
98	3882.14	97.71	0.66424	0.00442	0.65982					98	3972.35	99.98	1.11111	0.00483	1.10628
99	3796.42	95.56	0.74104	0.0054	0.73564					99	3972.03	99.98	1.11111	0.00412	1.10699
100	3955.44	99.56	0.68629	0.00475	0.68154					100	3972.5	99.99	1.11111	0.00474	1.10637
101	3949.75	99.41	0.68825	0.00451	0.68374					101	3971.06	99.95	1.11111	0.00441	1.1067
102	3746.11	94.29	0.69612	0.00464	0.69148					102	3972.67	99.99	1.11111	0.00533	1.10578
103	3893.4	98	0.6729	0.00491	0.66799					103	3972.35	99.98	1.11111	0.00504	1.10607
104	3970.95	99.95	0.81699	0.00471	0.81228					104	3972.35	99.98	1.11111	0.00421	1.1069
105	3888.92	97.88	0.6442	0.00485	0.63935					105	3973.01	100	1.11111	0.00478	1.10633
106	3860.31	97.16	0.61995	0.00526	0.61469					106	3968.36	99.88	1.11111	0.00471	1.1064
107	3912.03	98.47	0.65874	0.00491	0.65383					107	3972.5	99.99	1.11111	0.0049	1.10621
108	3835.09	96.53	0.63296	0.00475	0.62821					108	3972.67	99.99	1.11111	0.00388	1.10723
109	3847.25	96.83	0.69811	0.00504	0.69307					109	3970.73	99.94	1.11111	0.0041	1.10701
110	3852.57	96.97	0.62819	0.0052	0.62299					110	3971.46	99.96	1.11111	0.00573	1.10538
111	3922.26	98.72	0.67812	0.00492	0.6732					111	3966.29	99.83	1.11111	0.0051	1.10601
112	3941.59	99.21	0.68235	0.00536	0.67699					112	3972.67	99.99	1.11111	0.0036	1.10751
113	3885.01	97.78	0.65748	0.00528	0.6522					113	3973	100	1.11111	0.0041	1.10701
114	3972.03	99.98	1.10922	0.00507	1.10415					114	3973	100	1.11111	0.00354	1.10757
115	3879.39	97.64	0.69176	0.00588	0.68588					115	3963.71	99.77	1.11111	0.00417	1.10694
116	3970.41	99.93	1.00269	0.00525	0.99744					116	3972.67	99.99	1.11111	0.00484	1.10627
117	3927.75	98.86	0.7049	0.00562	0.69928					117	3970.41	99.93	1.11111	0.0045	1.10661
118	3796.59	95.56	0.69247	0.00451	0.68796					118	3969.39	99.91	1.11111	0.00515	1.10596
119	3919.49	98.65	0.73324	0.00452	0.72872					119	3972.35	99.98	1.11111	0.00459	1.10652
120	3912.24	98.47	0.6478	0.0038	0.644					120	3970.41	99.93	1.11111	0.00343	1.10768
121	3869.22	97.39	0.59763	0.00436	0.59327					121	3973.01	100	1.11111	0.00422	1.10689
122	3857.63	97.1	0.70451	0.0046	0.69991					122	3972.67	99.99	1.11111	0.00508	1.10603
123	3868.61	97.37	0.68168	0.00531	0.67637					123	3971.98	99.97	1.11111	0.00484	1.10627
124	3852.04	96.96	0.73244	0.00484	0.7276					124	3972.5	99.99	1.11111	0.00491	1.1062
125	3891.59	97.95	0.66367	0.00524	0.65843					125	3972.35	99.98	1.11111	0.00404	1.10707
126	3858.24	97.11	0.59207	0.00525	0.58682					126	3972.67	99.99	1.11111	0.0046	1.10651
127	3945.61	99.31	0.7441	0.00531	0.73879					127	3973	100	1.11111	0.00457	1.10654
128	3943.59	99.26	0.76639	0.00392	0.76247					128	3970.41	99.93	1.11111	0.0042	1.10691
129	3906.84	98.33	0.67138	0.00512	0.66626					129	3972.5	99.99	1.11111	0.00446	1.10665
130	3930.92	98.94	0.71763	0.00478	0.71285					130	3971.38	99.96	1.11111	0.00425	1.10686
131	3968.88	99.9	0.95791	0.00488	0.95303					131	3971.98	99.97	1.11111	0.00546	1.10565
132	3807.01	95.82	0.68466	0.00534	0.67932					132	3972.03	99.98	1.11111	0.0047	1.10641
133	3673.53	92.46	0.63812	0.00512	0.633					133	3971.98	99.97	1.11111	0.00468	1.10643
134	3880.15	97.66	0.64414	0.00484	0.6393					134	3972.67	99.99	1.11111	0.00506	1.10605
135	3952.31	99.48	0.75653	0.00528	0.75125					135	3966.29	99.83	1.11111	0.00403	1.10708
136	3853.59	96.99	0.70051	0.00512	0.69539					136	3972.5	99.99	1.11111	0.00536	1.10575
137	3916.86	98.59	0.70387	0.00396	0.69991					137	3973.01	100	1.11111	0.00415	1.10696
138	3879.89	97.66	0.72109	0.00487	0.71622					138	3973	100	1.11111	0.00495	1.10616
139	3968.88	99.9	1.08919	0.00392	1.08527					139	3972.67	99.99	1.11111	0.00411	1.107
140	3878.57	97.62	0.65127	0.00408	0.64719					140	3969.12	99.9	1.11111	0.00462	1.10649
141	3957.19	99.6	0.77932	0.00524	0.77408					141	3972.67	99.99	1.11111	0.00475	1.10636
142	3972.35	99.98	1.06872	0.00553	1.06319					142	3973	100	1.11111	0.0039	1.10721
143	3967.82	99.87	0.83717	0.0045	0.83267					143	3970.41	99.93	1.11111	0.00376	1.10735
144	3948.72	99.39	0.75241	0.00415	0.74826					144	3972.35	99.98	1.11111	0.00456	1.10655
145	3963.71	99.77	0.82508	0.0045	0.82058					145	3971.98	99.97	1.11111	0.00521	1.1059
146	3940.44	99.18	0.68151	0.00469	0.67682					146	3970.73	99.94	1.11111	0.00414	1.10697
147	3939.93	99.17	0.64987	0.00463	0.64524					147	3973.01	100	1.11111	0.00533	1.10578
148	3962.77	99.74	0.66713	0.00517	0.66196					148	3972.03	99.98	1.11111	0.0053	1.10581
149	3797.7	95.59	0.65523	0.00452	0.65071					149	3972.5	99.99	1.11111	0.00433	1.10678
150	3852.91	96.98	0.6461	0.00454	0.64156					150	3973.01	100	1.11111	0.00401	1.1071
151	3905.56	98.3	0.67027	0.00404	0.66623					151	3972.35	99.98	1.11111	0.00535	1.10576
152	3702.15	93.18	0.71829	0.00485	0.71344					152	3968.88	99.9	1.11111	0.00455	1.10656
153	3970.09	99.93	1.11102	0.00386	1.10716					153	3972.67	99.99	1.11111	0.0052	1.10591
154	3776.65	95.06	0.67392	0.00465	0.66927					154	3969.12	99.9	1.11111	0.00455	1.10656
155	3904.37	98.27	0.72979	0.00505	0.72474					155	3972.67	99.99	1.11111	0.00518	1.10593
156	3972.5	99.99	1.06325	0.00421	1.05904					156	3971.06	99.95	1.11111	0.0045	1.10661
157	3841.69	96.69	0.64742	0.00462	0.6428					157	3970.41	99.93	1.11111	0.00486	1.10625
158	3880.99	97.68	0.77687	0.00521	0.77166					158	3970.73	99.94	1.11111	0.005	1.10611
159	3819.17	96.13	0.68743	0.00449	0.68294					159	3968.8	99.89	1.11111	0.00464	1.10647
160	3841.18	96.68	0.67799	0.00444	0.67355					160	3972.35	99.98	1.11111	0.00471	1.1064
161	3851.5	96.94	0.67837	0.00478	0.67359					161	3972.5	99.99	1.11111	0.0038	1.10731
162	3826.96	96.32	0.69277	0.00503	0.68774					162	3972.03	99.98	1.11111	0.00445	1.10666
163	3927.34	98.85	0.62504	0.0046	0.62044					163	3971.98	99.97	1.11111	0.00396	1.10715
164	3850.84	96.93	0.70011	0.00483	0.69528					164	3970.41	99.93	1.11111	0.00395	1.10716
165	3939.5	99.16	0.70972	0.00402	0.7057					165	3972.35	99.98	1.11111	0.00405	1.10706
166	3910.1	98.42	0.63991	0.00507	0.63484					166	3973.01	100	1.11111	0.00566	1.10545
167	3971.7	99.97	1.08776	0.00457	1.08319					167	3965.24	99.8	1.11111	0.00465	1.10646
168	3972.67	99.99	1.06363	0.00486	1.05877					168	3968.88	99.9	1.11111	0.00439	1.10672
169	3850.66	96.92	0.79834	0.00407	0.79427					169	3971.98	99.97	1.11111	0.00435	1.10676
170	3924.32	98.77	0.60818	0.00484	0.60334					170	3968.8	99.89	1.11111	0.00455	1.10656
171	3968.36	99.88	0.77207	0.00506	0.76701					171	3970.41	99.93	1.11111	0.00462	1.10649
172	3917.97	98.61	0.68816	0.00497	0.68319					172	3972.67	99.99	1.11111	0.00482	1.10629
173	3964.12	99.78	0.63585	0.00514	0.63071					173	3973	100	1.11111	0.00517	1.10594
174	3971.46	99.96	0.95395	0.00393	0.95002					174	3969.12	99.9	1.11111	0.00486	1.10625
175	3973.01	100	1.08668	0.00497	1.08171					175	3972.03	99.98	1.11111	0.00491	1.1062
176	3908.39	98.37	0.63332	0.00525	0.62807					176	3972.67	99.99	1.11111	0.0049	1.10621
177	3972.35	99.98	1.10638	0.00423	1.10215					177	3972.67	99.99	1.11111	0.00434	1.10677
178	3925.45	98.8	0.71182	0.005	0.70682					178	3971.98	99.97	1.11111	0.00502	1.10609
179	3827.26	96.33	0.68476	0.00395	0.68081					179	3972.67	99.99	1.11111	0.00532	1.10579
180	3973	100	1.07208	0.00497	1.06711					180	3972.35	99.98	1.11111	0.00469	1.10642
181	3874.55	97.52	0.61825	0.00455	0.6137					181	3971.98	99.97	1.11111	0.00515	1.10596
182	3820.45	96.16	0.72813	0.00455	0.72358					182	3971.98	99.97	1.11111	0.00508	1.10603
183	3972.67	99.99	1.1019	0.00523	1.09667					183	3972.35	99.98	1.11111	0.004	1.10711
184	3878.3	97.62	0.7357	0.00529	0.73041					184	3959.42	99.66	1.11111	0.00457	1.10654
185	3734.4	93.99	0.67824	0.00444	0.6738					185	3972.67	99.99	1.11111	0.00401	1.1071
186	3832.66	96.47	0.68411	0.00442	0.67969					186	3971.98	99.97	1.11111	0.00404	1.10707
187	3953.28	99.5	0.63803	0.00469	0.63334					187	3972.67	99.99	1.11111	0.00529	1.10582
188	3901.34	98.2	0.62938	0.00483	0.62455					188	3972.67	99.99	1.11111	0.00326	1.10785
189	3873.73	97.5	0.58659	0.00433	0.58226					189	3970.41	99.93	1.11111	0.00489	1.10622
190	3892.87	97.98	0.66323	0.0051	0.65813					190	3972.35	99.98	1.11111	0.00494	1.10617
191	3945.61	99.31	0.73087	0.00484	0.72603					191	3970.73	99.94	1.11111	0.00438	1.10673
192	3890.3	97.92	0.71012	0.00549	0.70463					192	3972.67	99.99	1.11111	0.00389	1.10722
193	3934.04	99.02	0.64803	0.00551	0.64252					193	3970.41	99.93	1.11111	0.00441	1.1067
194	3954.39	99.53	0.65871	0.00519	0.65352					194	3970.73	99.94	1.11111	0.00452	1.10659
195	3972.03	99.98	0.76315	0.00439	0.75876					195	3972.03	99.98	1.11111	0.00378	1.10733
196	3952.33	99.48	0.83851	0.005	0.83351					196	3972.67	99.99	1.11111	0.00523	1.10588
197	3881.85	97.71	0.67166	0.00538	0.66628					197	3972.5	99.99	1.11111	0.00381	1.1073
198	3856.35	97.06	0.76591	0.00502	0.76089					198	3972.35	99.98	1.11111	0.00425	1.10686
199	3801.37	95.68	0.64748	0.00467	0.64281					199	3972.67	99.99	1.11111	0.00535	1.10576
200	3961.12	99.7	0.63501	0.00433	0.63068					200	3970.09	99.93	1.11111	0.00478	1.10633

## Sheet: 02_MMACO_Seeds(2)
Fast Converegnce Exp							Fast Converegnce Exp			Slow Converegnce Exp							Slow Converegnce Exp
#	CBLF	Quality	Taumax	Taumin	DeltaTauminmax		Global Optimal Solution =	3973.01		#	CBLF	Quality	Taumax	Taumin	DeltaTauminmax		Global Optimal Solution =	3973.01
1	3956.84	99.59	0.71535	0.00481	0.71054		Minimum Optimal Solution =	3711.29		1	3962.98	99.75	1.11111	0.00481	1.1063		Minimum Optimal Solution =	3953.93
2	3972.5	99.99	1.0544	0.0049	1.0495		Mean of Optimal Solution =	3910.34		2	3959.75	99.67	1.11111	0.00524	1.10587		Mean of Optimal Solution =	3970.85
3	3959.05	99.65	0.89085	0.00462	0.88623		Median of Optimal Solution =	3910.34		3	3972.35	99.98	1.11111	0.00525	1.10586		Median of Optimal Solution =	3970.85
4	3901.62	98.2	0.67168	0.0048	0.66688		Solution Standrad Deviation =	62.6436		4	3966.86	99.85	1.11111	0.00436	1.10675		Solution Standrad Deviation =	3.0877
5	3770.52	94.9	0.68837	0.00527	0.6831		Average Price =	25.295		5	3972.67	99.99	1.11111	0.00475	1.10636		Average Price =	100.525
6	3921.76	98.71	0.81533	0.00477	0.81056		Relability =	17.5		6	3972.35	99.98	1.11111	0.00507	1.10604		Relability =	80
7	3895.99	98.06	0.74886	0.00422	0.74464		Normalized Price =	144.543		7	3972.17	99.98	1.11111	0.005	1.10611		Normalized Price =	125.656
8	3773.54	94.98	0.71616	0.00521	0.71095		Average Solution Quality =	98.4226		8	3971.98	99.97	1.11111	0.00423	1.10688		Average Solution Quality =	99.9457
9	3911.92	98.46	0.67792	0.00495	0.67297		Average FDC =	-293.638		9	3972.5	99.99	1.11111	0.00477	1.10634		Average FDC =	-164.004
10	3823.61	96.24	0.67561	0.00573	0.66988		Correlation Coefficent =	-1		10	3972.67	99.99	1.11111	0.00421	1.1069		Correlation Coefficent =	-0.83431
11	3972.67	99.99	1.10671	0.00456	1.10215		Solution Robustness =	62.422		11	3968.36	99.88	1.11111	0.00493	1.10618		Solution Robustness =	1286
12	3940.44	99.18	0.71103	0.00459	0.70644		Performance Rate =	0.0069184		12	3973	100	1.11111	0.00464	1.10647		Performance Rate =	0.0079582
13	3969.44	99.91	1.04091	0.00471	1.0362		Average Elapsed Time =	1.1807		13	3968.88	99.9	1.11111	0.00434	1.10677		Average Elapsed Time =	4.5794
14	3938.09	99.12	0.67991	0.00467	0.67524					14	3965.24	99.8	1.11111	0.00524	1.10587
15	3870.65	97.42	0.65477	0.00469	0.65008					15	3968.8	99.89	1.11111	0.00384	1.10727
16	3854.19	97.01	0.6531	0.00533	0.64777					16	3973.01	100	1.11111	0.00414	1.10697
17	3870.92	97.43	0.61554	0.00451	0.61103					17	3968.36	99.88	1.11111	0.00361	1.1075
18	3971.98	99.97	1.06222	0.00506	1.05716					18	3972.35	99.98	1.11111	0.00497	1.10614
19	3937.45	99.1	0.79251	0.00432	0.78819					19	3970.09	99.93	1.11111	0.00459	1.10652
20	3866	97.31	0.68706	0.00477	0.68229					20	3973.01	100	1.11111	0.00473	1.10638
21	3960.74	99.69	0.77627	0.00417	0.7721					21	3971.98	99.97	1.11111	0.00383	1.10728
22	3908.78	98.38	0.7162	0.00564	0.71056					22	3972.67	99.99	1.11111	0.00565	1.10546
23	3968.36	99.88	0.8879	0.00493	0.88297					23	3972.67	99.99	1.11111	0.00466	1.10645
24	3965.26	99.8	0.69267	0.00459	0.68808					24	3973	100	1.11111	0.00523	1.10588
25	3711.29	93.41	0.61955	0.00468	0.61487					25	3968.88	99.9	1.11111	0.00541	1.1057
26	3908.64	98.38	0.76272	0.0053	0.75742					26	3971.98	99.97	1.11111	0.00428	1.10683
27	3873.35	97.49	0.69644	0.00496	0.69148					27	3972.5	99.99	1.11111	0.00515	1.10596
28	3791.44	95.43	0.63681	0.00505	0.63176					28	3962.16	99.73	1.11111	0.00505	1.10606
29	3971.98	99.97	0.95042	0.0037	0.94672					29	3973	100	1.11111	0.00539	1.10572
30	3773.23	94.97	0.6523	0.00485	0.64745					30	3971.98	99.97	1.11111	0.00407	1.10704
31	3949.41	99.41	0.66587	0.00421	0.66166					31	3962.01	99.72	1.11111	0.0044	1.10671
32	3943.55	99.26	0.65691	0.00495	0.65196					32	3972.35	99.98	1.11111	0.00447	1.10664
33	3880.47	97.67	0.66636	0.0044	0.66196					33	3972.5	99.99	1.11111	0.00462	1.10649
34	3965.91	99.82	0.94893	0.00387	0.94506					34	3973.01	100	1.11111	0.00491	1.1062
35	3944.88	99.29	0.73861	0.00454	0.73407					35	3967.18	99.85	1.11111	0.00474	1.10637
36	3894.58	98.03	0.67795	0.00496	0.67299					36	3969.39	99.91	1.11111	0.00485	1.10626
37	3968.8	99.89	0.88845	0.00478	0.88367					37	3973	100	1.11111	0.00525	1.10586
38	3960.53	99.69	0.69063	0.00438	0.68625					38	3972.67	99.99	1.11111	0.00502	1.10609
39	3946.64	99.34	0.63262	0.00435	0.62827					39	3972.67	99.99	1.11111	0.00499	1.10612
40	3901.14	98.19	0.68907	0.0046	0.68447					40	3971.06	99.95	1.11111	0.00512	1.10599
41	3801.93	95.69	0.64073	0.00311	0.63762					41	3972.5	99.99	1.11111	0.00457	1.10654
42	3973.01	100	1.05357	0.00376	1.04981					42	3964.22	99.78	1.11111	0.00471	1.1064
43	3971.98	99.97	1.06425	0.005	1.05925					43	3972.35	99.98	1.11111	0.00466	1.10645
44	3864.96	97.28	0.63473	0.00472	0.63001					44	3971.98	99.97	1.11111	0.00479	1.10632
45	3881.67	97.7	0.67896	0.00481	0.67415					45	3971.46	99.96	1.11111	0.00556	1.10555
46	3901.72	98.21	0.66163	0.00493	0.6567					46	3972.67	99.99	1.11111	0.00467	1.10644
47	3890.81	97.93	0.67662	0.00455	0.67207					47	3965.24	99.8	1.11111	0.00454	1.10657
48	3931.14	98.95	0.70607	0.00468	0.70139					48	3973.01	100	1.11111	0.00442	1.10669
49	3950.38	99.43	0.80482	0.00463	0.80019					49	3953.93	99.52	1.11111	0.00458	1.10653
50	3970.73	99.94	1.0687	0.00474	1.06396					50	3971.98	99.97	1.11111	0.00497	1.10614
51	3972.67	99.99	1.07201	0.00547	1.06654					51	3972.03	99.98	1.11111	0.0049	1.10621
52	3901.28	98.19	0.7751	0.00505	0.77005					52	3972.67	99.99	1.11111	0.00507	1.10604
53	3968.36	99.88	0.84393	0.00469	0.83924					53	3972.35	99.98	1.11111	0.00509	1.10602
54	3927.34	98.85	0.65983	0.00508	0.65475					54	3972.67	99.99	1.11111	0.00515	1.10596
55	3754.39	94.5	0.71543	0.00517	0.71026					55	3967.5	99.86	1.11111	0.00475	1.10636
56	3954.58	99.54	0.65153	0.00524	0.64629					56	3972.35	99.98	1.11111	0.00482	1.10629
57	3927.04	98.84	0.67218	0.00413	0.66805					57	3972.67	99.99	1.11111	0.00499	1.10612
58	3771.9	94.94	0.64136	0.00573	0.63563					58	3968.36	99.88	1.11111	0.00446	1.10665
59	3947.05	99.35	0.62201	0.00378	0.61823					59	3972.35	99.98	1.11111	0.00519	1.10592
60	3939.92	99.17	0.71158	0.00513	0.70645					60	3973.01	100	1.11111	0.00485	1.10626
61	3865.67	97.3	0.75783	0.0048	0.75303					61	3973.01	100	1.11111	0.00469	1.10642
62	3971.98	99.97	1.10229	0.00421	1.09808					62	3972.5	99.99	1.11111	0.00495	1.10616
63	3837.59	96.59	0.59697	0.0049	0.59207					63	3973	100	1.11111	0.00387	1.10724
64	3939.98	99.17	0.76883	0.0055	0.76333					64	3966.86	99.85	1.11111	0.00409	1.10702
65	3971.46	99.96	1.01087	0.00462	1.00625					65	3973.01	100	1.11111	0.00401	1.1071
66	3956.22	99.58	0.73535	0.0036	0.73175					66	3965.78	99.82	1.11111	0.00507	1.10604
67	3967.5	99.86	1.06084	0.00492	1.05592					67	3971.46	99.96	1.11111	0.00419	1.10692
68	3827.78	96.34	0.66622	0.00474	0.66148					68	3965.56	99.81	1.11111	0.00435	1.10676
69	3908.91	98.39	0.74463	0.00489	0.73974					69	3967.18	99.85	1.11111	0.00476	1.10635
70	3962.16	99.73	0.77138	0.00428	0.7671					70	3967.5	99.86	1.11111	0.00394	1.10717
71	3946.32	99.33	0.65426	0.00454	0.64972					71	3971.46	99.96	1.11111	0.00548	1.10563
72	3959.05	99.65	0.65192	0.00452	0.6474					72	3968.36	99.88	1.11111	0.00484	1.10627
73	3962.66	99.74	0.72845	0.00441	0.72404					73	3973	100	1.11111	0.00455	1.10656
74	3896.5	98.07	0.73424	0.00447	0.72977					74	3972.5	99.99	1.11111	0.00496	1.10615
75	3960.51	99.69	0.63622	0.00484	0.63138					75	3972.67	99.99	1.11111	0.00467	1.10644
76	3973.01	100	1.06881	0.00504	1.06377					76	3966.86	99.85	1.11111	0.00466	1.10645
77	3890.07	97.91	0.67238	0.004	0.66838					77	3967.5	99.86	1.11111	0.00481	1.1063
78	3902.19	98.22	0.6301	0.00487	0.62523					78	3972.35	99.98	1.11111	0.0049	1.10621
79	3927.2	98.85	0.79034	0.00434	0.786					79	3970.95	99.95	1.11111	0.00502	1.10609
80	3961.04	99.7	0.72081	0.00523	0.71558					80	3972.67	99.99	1.11111	0.0054	1.10571
81	3939.41	99.15	0.66168	0.00479	0.65689					81	3973.01	100	1.11111	0.00455	1.10656
82	3945.2	99.3	0.65316	0.00472	0.64844					82	3972.67	99.99	1.11111	0.00486	1.10625
83	3967.5	99.86	1.04424	0.00392	1.04032					83	3970.41	99.93	1.11111	0.00448	1.10663
84	3946.64	99.34	0.78422	0.00485	0.77937					84	3972.35	99.98	1.11111	0.00508	1.10603
85	3926.48	98.83	0.78398	0.0044	0.77958					85	3972.67	99.99	1.11111	0.00432	1.10679
86	3966.86	99.85	0.76384	0.00466	0.75918					86	3969.12	99.9	1.11111	0.00479	1.10632
87	3973.01	100	1.00269	0.00557	0.99712					87	3971.98	99.97	1.11111	0.00484	1.10627
88	3880.57	97.67	0.69734	0.005	0.69234					88	3972.67	99.99	1.11111	0.00424	1.10687
89	3927.22	98.85	0.67483	0.0047	0.67013					89	3972.35	99.98	1.11111	0.00515	1.10596
90	3959.05	99.65	0.76976	0.00487	0.76489					90	3963.71	99.77	1.11111	0.00391	1.1072
91	3740.33	94.14	0.7597	0.00392	0.75578					91	3971.06	99.95	1.11111	0.0039	1.10721
92	3972.67	99.99	1.00623	0.00415	1.00208					92	3971.98	99.97	1.11111	0.00542	1.10569
93	3925.26	98.8	0.74594	0.00456	0.74138					93	3972.67	99.99	1.11111	0.00475	1.10636
94	3943.03	99.25	0.63403	0.00521	0.62882					94	3970.09	99.93	1.11111	0.00438	1.10673
95	3879.73	97.65	0.68594	0.00461	0.68133					95	3972.67	99.99	1.11111	0.00464	1.10647
96	3967.97	99.87	0.94409	0.00558	0.93851					96	3969.39	99.91	1.11111	0.00494	1.10617
97	3778.04	95.09	0.64013	0.00525	0.63488					97	3973	100	1.11111	0.00492	1.10619
98	3824.66	96.27	0.70607	0.00503	0.70104					98	3967.84	99.87	1.11111	0.00426	1.10685
99	3942.76	99.24	0.75049	0.00491	0.74558					99	3972.35	99.98	1.11111	0.00473	1.10638
100	3749.96	94.39	0.64751	0.00486	0.64265					100	3972.67	99.99	1.11111	0.00467	1.10644
101	3932.23	98.97	0.69455	0.00463	0.68992					101	3972.5	99.99	1.11111	0.00362	1.10749
102	3906.8	98.33	0.7534	0.00492	0.74848					102	3966.86	99.85	1.11111	0.00477	1.10634
103	3828.78	96.37	0.68733	0.0046	0.68273					103	3972.35	99.98	1.11111	0.00411	1.107
104	3972.49	99.99	1.10939	0.00444	1.10495					104	3972.35	99.98	1.11111	0.00484	1.10627
105	3952.96	99.5	0.80011	0.00486	0.79525					105	3972.67	99.99	1.11111	0.00473	1.10638
106	3964.22	99.78	0.922	0.00472	0.91728					106	3970.73	99.94	1.11111	0.0045	1.10661
107	3967.5	99.86	0.96414	0.0046	0.95954					107	3973	100	1.11111	0.00406	1.10705
108	3898.05	98.11	0.60845	0.00508	0.60337					108	3969.12	99.9	1.11111	0.00494	1.10617
109	3894.79	98.03	0.69643	0.00417	0.69226					109	3971.98	99.97	1.11111	0.00483	1.10628
110	3871.71	97.45	0.6749	0.00519	0.66971					110	3969.12	99.9	1.11111	0.00468	1.10643
111	3928.03	98.87	0.63997	0.00531	0.63466					111	3972.67	99.99	1.11111	0.00464	1.10647
112	3923.23	98.75	0.64019	0.00474	0.63545					112	3968.88	99.9	1.11111	0.00466	1.10645
113	3931.14	98.95	0.59801	0.00462	0.59339					113	3973	100	1.11111	0.00547	1.10564
114	3969.76	99.92	0.95451	0.00493	0.94958					114	3972.35	99.98	1.11111	0.00456	1.10655
115	3973	100	0.66212	0.00517	0.65695					115	3972.67	99.99	1.11111	0.00505	1.10606
116	3762.6	94.7	0.67547	0.00513	0.67034					116	3973.01	100	1.11111	0.00519	1.10592
117	3973	100	0.95051	0.00511	0.9454					117	3967.5	99.86	1.11111	0.00436	1.10675
118	3946.2	99.33	0.70801	0.00519	0.70282					118	3972.67	99.99	1.11111	0.00395	1.10716
119	3806.57	95.81	0.59831	0.00477	0.59354					119	3972.67	99.99	1.11111	0.00365	1.10746
120	3966.53	99.84	0.74054	0.00498	0.73556					120	3972.5	99.99	1.11111	0.00365	1.10746
121	3884.09	97.76	0.69568	0.00524	0.69044					121	3973.01	100	1.11111	0.00432	1.10679
122	3865.13	97.28	0.62844	0.00475	0.62369					122	3969.12	99.9	1.11111	0.00485	1.10626
123	3968.36	99.88	0.96774	0.0054	0.96234					123	3962.67	99.74	1.11111	0.0052	1.10591
124	3972.67	99.99	1.04594	0.00454	1.0414					124	3967.18	99.85	1.11111	0.00526	1.10585
125	3929.67	98.91	0.77408	0.00499	0.76909					125	3971.98	99.97	1.11111	0.00494	1.10617
126	3946.65	99.34	0.59907	0.00452	0.59455					126	3968.36	99.88	1.11111	0.00519	1.10592
127	3902.34	98.22	0.6877	0.00489	0.68281					127	3971.98	99.97	1.11111	0.00408	1.10703
128	3968.15	99.88	0.90634	0.00386	0.90248					128	3972.67	99.99	1.11111	0.00357	1.10754
129	3972.03	99.98	1.00769	0.00389	1.0038					129	3972.67	99.99	1.11111	0.00511	1.106
130	3933.72	99.01	0.73463	0.00489	0.72974					130	3972.67	99.99	1.11111	0.0039	1.10721
131	3756.91	94.56	0.63593	0.00494	0.63099					131	3969.44	99.91	1.11111	0.00417	1.10694
132	3851.52	96.94	0.67849	0.00454	0.67395					132	3972.35	99.98	1.11111	0.00451	1.1066
133	3836.3	96.56	0.6063	0.00451	0.60179					133	3972.67	99.99	1.11111	0.00473	1.10638
134	3956.63	99.59	0.77947	0.00503	0.77444					134	3972.67	99.99	1.11111	0.00456	1.10655
135	3949.99	99.42	0.75053	0.00446	0.74607					135	3970.09	99.93	1.11111	0.00457	1.10654
136	3760.01	94.64	0.65899	0.00436	0.65463					136	3971.98	99.97	1.11111	0.00507	1.10604
137	3843.77	96.75	0.5954	0.00537	0.59003					137	3968.88	99.9	1.11111	0.00461	1.1065
138	3924.2	98.77	0.84058	0.00529	0.83529					138	3972.67	99.99	1.11111	0.00484	1.10627
139	3821.02	96.17	0.62854	0.00487	0.62367					139	3972.67	99.99	1.11111	0.00496	1.10615
140	3932.07	98.97	0.82311	0.00481	0.8183					140	3971.98	99.97	1.11111	0.00467	1.10644
141	3893.4	98	0.66094	0.00489	0.65605					141	3972.35	99.98	1.11111	0.00401	1.1071
142	3919.04	98.64	0.69425	0.00468	0.68957					142	3972.35	99.98	1.11111	0.0054	1.10571
143	3768.8	94.86	0.65751	0.0047	0.65281					143	3970.73	99.94	1.11111	0.00456	1.10655
144	3840.45	96.66	0.67461	0.00492	0.66969					144	3969.12	99.9	1.11111	0.00506	1.10605
145	3902.7	98.23	0.84893	0.00437	0.84456					145	3966.53	99.84	1.11111	0.00412	1.10699
146	3885.19	97.79	0.6556	0.00402	0.65158					146	3973	100	1.11111	0.00414	1.10697
147	3892.2	97.97	0.69179	0.00494	0.68685					147	3973	100	1.11111	0.00492	1.10619
148	3933.99	99.02	0.76763	0.00443	0.7632					148	3971.46	99.96	1.11111	0.00443	1.10668
149	3972.5	99.99	1.09275	0.00512	1.08763					149	3973.01	100	1.11111	0.0049	1.10621
150	3925.17	98.8	0.77537	0.00466	0.77071					150	3972.67	99.99	1.11111	0.00439	1.10672
151	3871.17	97.44	0.62449	0.00529	0.6192					151	3972.5	99.99	1.11111	0.00433	1.10678
152	3972.67	99.99	1.08662	0.00501	1.08161					152	3972.67	99.99	1.11111	0.00442	1.10669
153	3849.45	96.89	0.69845	0.0048	0.69365					153	3972.67	99.99	1.11111	0.00505	1.10606
154	3936.31	99.08	0.66616	0.00466	0.6615					154	3973	100	1.11111	0.00393	1.10718
155	3797.24	95.58	0.74817	0.00508	0.74309					155	3972.5	99.99	1.11111	0.00415	1.10696
156	3872.63	97.47	0.75371	0.00442	0.74929					156	3971.98	99.97	1.11111	0.00504	1.10607
157	3973.01	100	1.07193	0.00502	1.06691					157	3972.35	99.98	1.11111	0.00468	1.10643
158	3878.05	97.61	0.68087	0.00521	0.67566					158	3969.44	99.91	1.11111	0.00436	1.10675
159	3840.32	96.66	0.63416	0.00477	0.62939					159	3972.67	99.99	1.11111	0.00463	1.10648
160	3972.67	99.99	1.01146	0.00515	1.00631					160	3962.66	99.74	1.11111	0.00415	1.10696
161	3949.23	99.4	0.67172	0.00494	0.66678					161	3972.67	99.99	1.11111	0.0051	1.10601
162	3972.35	99.98	1.00194	0.00516	0.99678					162	3973	100	1.11111	0.00484	1.10627
163	3896.73	98.08	0.76148	0.00508	0.7564					163	3972.35	99.98	1.11111	0.00457	1.10654
164	3811.39	95.93	0.63859	0.00492	0.63367					164	3970.73	99.94	1.11111	0.00443	1.10668
165	3971.46	99.96	1.06323	0.00478	1.05845					165	3970.73	99.94	1.11111	0.00519	1.10592
166	3922.05	98.72	0.68484	0.00486	0.67998					166	3972.35	99.98	1.11111	0.00448	1.10663
167	3928.72	98.89	0.68346	0.00499	0.67847					167	3971.98	99.97	1.11111	0.00535	1.10576
168	3949.23	99.4	0.62771	0.00403	0.62368					168	3972.67	99.99	1.11111	0.00408	1.10703
169	3889.26	97.89	0.61652	0.00464	0.61188					169	3973	100	1.11111	0.0055	1.10561
170	3810.14	95.9	0.64553	0.00488	0.64065					170	3971.98	99.97	1.11111	0.00437	1.10674
171	3860.42	97.17	0.68073	0.00498	0.67575					171	3971.06	99.95	1.11111	0.00483	1.10628
172	3879.88	97.66	0.63039	0.00496	0.62543					172	3972.35	99.98	1.11111	0.00494	1.10617
173	3972.67	99.99	1.05408	0.00514	1.04894					173	3972.67	99.99	1.11111	0.0046	1.10651
174	3949.41	99.41	0.72234	0.00453	0.71781					174	3971.46	99.96	1.11111	0.00433	1.10678
175	3939.71	99.16	0.7432	0.00466	0.73854					175	3971.98	99.97	1.11111	0.00475	1.10636
176	3823.95	96.25	0.65788	0.00475	0.65313					176	3971.98	99.97	1.11111	0.00481	1.1063
177	3973.01	100	1.00687	0.005	1.00187					177	3972.67	99.99	1.11111	0.00419	1.10692
178	3872.6	97.47	0.64913	0.00428	0.64485					178	3969.76	99.92	1.11111	0.00455	1.10656
179	3900.39	98.17	0.69599	0.00553	0.69046					179	3972.35	99.98	1.11111	0.00491	1.1062
180	3972.67	99.99	1.097	0.00435	1.09265					180	3972.35	99.98	1.11111	0.00533	1.10578
181	3853.59	96.99	0.70914	0.00479	0.70435					181	3973	100	1.11111	0.00452	1.10659
182	3830.32	96.41	0.68323	0.00405	0.67918					182	3959.75	99.67	1.11111	0.00499	1.10612
183	3967	99.85	0.77826	0.00377	0.77449					183	3972.5	99.99	1.11111	0.00487	1.10624
184	3972.5	99.99	1.0544	0.00548	1.04892					184	3972.67	99.99	1.11111	0.00525	1.10586
185	3796.55	95.56	0.68981	0.00519	0.68462					185	3973	100	1.11111	0.00536	1.10575
186	3810.98	95.92	0.65293	0.0053	0.64763					186	3971.06	99.95	1.11111	0.00486	1.10625
187	3894.26	98.02	0.66204	0.00458	0.65746					187	3973	100	1.11111	0.00497	1.10614
188	3966.88	99.85	0.9297	0.00493	0.92477					188	3972.5	99.99	1.11111	0.00464	1.10647
189	3829.16	96.38	0.66563	0.00333	0.6623					189	3972.35	99.98	1.11111	0.00545	1.10566
190	3971.46	99.96	1.05485	0.00472	1.05013					190	3970.09	99.93	1.11111	0.0043	1.10681
191	3970.73	99.94	1.09453	0.00498	1.08955					191	3972.35	99.98	1.11111	0.00451	1.1066
192	3904.3	98.27	0.74278	0.00445	0.73833					192	3972.35	99.98	1.11111	0.00454	1.10657
193	3960.53	99.69	0.78023	0.0041	0.77613					193	3959.57	99.66	1.11111	0.00491	1.1062
194	3971.06	99.95	1.04854	0.00489	1.04365					194	3973.01	100	1.11111	0.00424	1.10687
195	3964.12	99.78	1.00246	0.00481	0.99765					195	3972.35	99.98	1.11111	0.00441	1.1067
196	3973	100	1.10843	0.00437	1.10406					196	3966.53	99.84	1.11111	0.00384	1.10727
197	3928.55	98.88	0.66629	0.00468	0.66161					197	3971.98	99.97	1.11111	0.0051	1.10601
198	3887.71	97.85	0.73137	0.00492	0.72645					198	3967.5	99.86	1.11111	0.00484	1.10627
199	3940.82	99.19	0.62429	0.00432	0.61997					199	3972.35	99.98	1.11111	0.00438	1.10673
200	3972.35	99.98	0.96682	0.00467	0.96215					200	3971.46	99.96	1.11111	0.00488	1.10623

## Sheet: 03_MMACO_Seeds(50)
Fast Converegnce Exp							Fast Converegnce Exp			Slow Converegnce Exp							Slow Converegnce Exp
#	CBLF	Quality	Taumax	Taumin	DeltaTauminmax		Global Optimal Solution =	3973.01		#	CBLF	Quality	Taumax	Taumin	DeltaTauminmax		Global Optimal Solution =	3973.01
1	3948.9	99.39	0.70356	0.00451	0.69905		Minimum Optimal Solution=	3709.57		1	3972.67	99.99	1.11111	0.00451	1.1066		Minimum Optimal Solution =	3953.61
2	3916.12	98.57	0.68438	0.00509	0.67929		Mean of Optimal Solution =	3904.49		2	3973	100	1.11111	0.00402	1.10709		Mean of Optimal Solution =	3971.57
3	3973	100	0.99585	0.00537	0.99048		Median of Optimal Solution =	3904.49		3	3973	100	1.11111	0.00385	1.10726		Median of Optimal Solution =	3971.57
4	3972.67	99.99	1.09442	0.00436	1.09006		Solution Standrad Deviation =	62.8138		4	3970.09	99.93	1.11111	0.00503	1.10608		Solution Standrad Deviation =	2.3724
5	3936.25	99.07	0.64441	0.00479	0.63962		Average Price =	24.8		5	3972.67	99.99	1.11111	0.00479	1.10632		Average Price =	101.145
6	3846.43	96.81	0.69823	0.00504	0.69319		Relability =	19.5		6	3968.15	99.88	1.11111	0.00446	1.10665		Relability =	92
7	3970.95	99.95	0.88125	0.00433	0.87692		Normalized Price =	127.18		7	3973	100	1.11111	0.00491	1.1062		Normalized Price =	109.94
8	3818.49	96.11	0.59443	0.00441	0.59002		Average Solution Quality =	98.2754		8	3971.06	99.95	1.11111	0.00441	1.1067		Average Solution Quality =	99.9636
9	3973	100	1.1056	0.00458	1.10102		Average FDC =	-297.518		9	3972.5	99.99	1.11111	0.0048	1.10631		Average FDC =	-161.715
10	3968.36	99.88	0.81784	0.00496	0.81288		Correlation Coefficent =	-1		10	3973	100	1.11111	0.005	1.10611		Correlation Coefficent =	-0.8206
11	3972.5	99.99	1.10229	0.00528	1.09701		Solution Robustness =	62.1597		11	3973.01	100	1.11111	0.00506	1.10605		Solution Robustness =	1674.08
12	3970.09	99.93	1.02791	0.00516	1.02275		Performance Rate =	0.0078629		12	3972.67	99.99	1.11111	0.0041	1.10701		Performance Rate =	0.0090959
13	3859.28	97.14	0.71449	0.00474	0.70975		Average Elapsed Time =	1.1578		13	3972.35	99.98	1.11111	0.00517	1.10594		Average Elapsed Time =	4.6206
14	3973	100	1.03453	0.00454	1.02999					14	3972.03	99.98	1.11111	0.00472	1.10639
15	3947.93	99.37	0.8831	0.00392	0.87918					15	3972.67	99.99	1.11111	0.0042	1.10691
16	3972.67	99.99	1.07201	0.00519	1.06682					16	3972.35	99.98	1.11111	0.00478	1.10633
17	3837.49	96.59	0.71985	0.00454	0.71531					17	3972.35	99.98	1.11111	0.00433	1.10678
18	3849.96	96.9	0.66212	0.00512	0.657					18	3973	100	1.11111	0.00403	1.10708
19	3972.35	99.98	1.09583	0.00475	1.09108					19	3972.35	99.98	1.11111	0.00498	1.10613
20	3818.27	96.11	0.67865	0.00461	0.67404					20	3972.67	99.99	1.11111	0.00537	1.10574
21	3930.48	98.93	0.71865	0.00462	0.71403					21	3970.41	99.93	1.11111	0.00549	1.10562
22	3931.66	98.96	0.67987	0.00512	0.67475					22	3972.35	99.98	1.11111	0.00483	1.10628
23	3940.96	99.19	0.65993	0.00462	0.65531					23	3969.39	99.91	1.11111	0.00448	1.10663
24	3834.68	96.52	0.71355	0.00469	0.70886					24	3973.01	100	1.11111	0.00485	1.10626
25	3950.38	99.43	0.69438	0.00396	0.69042					25	3970.73	99.94	1.11111	0.00509	1.10602
26	3884.09	97.76	0.66796	0.004	0.66396					26	3973	100	1.11111	0.00527	1.10584
27	3820.55	96.16	0.61383	0.00421	0.60962					27	3972.35	99.98	1.11111	0.00519	1.10592
28	3856.79	97.07	0.7227	0.00495	0.71775					28	3970.73	99.94	1.11111	0.00472	1.10639
29	3970.41	99.93	1.11012	0.0058	1.10432					29	3972.67	99.99	1.11111	0.00444	1.10667
30	3840.29	96.66	0.6392	0.0048	0.6344					30	3973	100	1.11111	0.00489	1.10622
31	3935.83	99.06	0.71998	0.00495	0.71503					31	3968.36	99.88	1.11111	0.00491	1.1062
32	3973.01	100	1.08668	0.00397	1.08271					32	3972.67	99.99	1.11111	0.00479	1.10632
33	3865.73	97.3	0.75041	0.00408	0.74633					33	3969.44	99.91	1.11111	0.00438	1.10673
34	3973.01	100	1.06325	0.00548	1.05777					34	3973	100	1.11111	0.00409	1.10702
35	3811.37	95.93	0.66528	0.00424	0.66104					35	3971.98	99.97	1.11111	0.00529	1.10582
36	3944.4	99.28	0.69193	0.00465	0.68728					36	3968.88	99.9	1.11111	0.00495	1.10616
37	3931.4	98.95	0.67775	0.00464	0.67311					37	3972.5	99.99	1.11111	0.00432	1.10679
38	3864.96	97.28	0.64306	0.0044	0.63866					38	3973	100	1.11111	0.00549	1.10562
39	3970.41	99.93	0.7155	0.00494	0.71056					39	3973	100	1.11111	0.00455	1.10656
40	3971.98	99.97	1.07192	0.00508	1.06684					40	3972.35	99.98	1.11111	0.0046	1.10651
41	3886.16	97.81	0.63286	0.00503	0.62783					41	3972.67	99.99	1.11111	0.00402	1.10709
42	3964.27	99.78	0.69861	0.00469	0.69392					42	3972.67	99.99	1.11111	0.00486	1.10625
43	3973	100	1.0915	0.00373	1.08777					43	3965.24	99.8	1.11111	0.00487	1.10624
44	3949.75	99.41	0.6855	0.0045	0.681					44	3970.41	99.93	1.11111	0.00544	1.10567
45	3726.66	93.8	0.64139	0.00458	0.63681					45	3973	100	1.11111	0.00481	1.1063
46	3862.13	97.21	0.68591	0.005	0.68091					46	3970.09	99.93	1.11111	0.00479	1.10632
47	3956.95	99.6	0.79077	0.00456	0.78621					47	3972.5	99.99	1.11111	0.00492	1.10619
48	3871.32	97.44	0.72887	0.00576	0.72311					48	3973.01	100	1.11111	0.00465	1.10646
49	3884.09	97.76	0.6828	0.00489	0.67791					49	3970.73	99.94	1.11111	0.00469	1.10642
50	3956.51	99.58	0.88869	0.00405	0.88464					50	3971.98	99.97	1.11111	0.00468	1.10643
51	3925.26	98.8	0.6913	0.00371	0.68759					51	3969.12	99.9	1.11111	0.00476	1.10635
52	3875.84	97.55	0.68444	0.00417	0.68027					52	3973.01	100	1.11111	0.00484	1.10627
53	3877.37	97.59	0.65314	0.00535	0.64779					53	3971.38	99.96	1.11111	0.00441	1.1067
54	3885.09	97.79	0.64763	0.00444	0.64319					54	3972.67	99.99	1.11111	0.00422	1.10689
55	3961.36	99.71	0.64991	0.00539	0.64452					55	3972.35	99.98	1.11111	0.00475	1.10636
56	3873.72	97.5	0.73828	0.0047	0.73358					56	3969.39	99.91	1.11111	0.00467	1.10644
57	3973	100	1.0981	0.00438	1.09372					57	3972.5	99.99	1.11111	0.00449	1.10662
58	3860.97	97.18	0.68297	0.00429	0.67868					58	3972.5	99.99	1.11111	0.00533	1.10578
59	3786.15	95.3	0.62158	0.00464	0.61694					59	3972.35	99.98	1.11111	0.00311	1.108
60	3851.81	96.95	0.72508	0.00464	0.72044					60	3968.36	99.88	1.11111	0.0043	1.10681
61	3890.3	97.92	0.62284	0.00506	0.61778					61	3972.35	99.98	1.11111	0.00416	1.10695
62	3773.39	94.98	0.65637	0.00452	0.65185					62	3970.43	99.94	1.11111	0.00454	1.10657
63	3971.98	99.97	0.7581	0.0051	0.753					63	3972.67	99.99	1.11111	0.00461	1.1065
64	3959.05	99.65	0.70088	0.00465	0.69623					64	3958.13	99.63	1.11111	0.00459	1.10652
65	3870.45	97.42	0.66472	0.00452	0.6602					65	3972.67	99.99	1.11111	0.00397	1.10714
66	3847.74	96.85	0.64894	0.00516	0.64378					66	3972.67	99.99	1.11111	0.00392	1.10719
67	3914.18	98.52	0.67863	0.00403	0.6746					67	3972.67	99.99	1.11111	0.00453	1.10658
68	3917.18	98.59	0.72811	0.00357	0.72454					68	3972.35	99.98	1.11111	0.00425	1.10686
69	3906.32	98.32	0.769	0.00383	0.76517					69	3971.46	99.96	1.11111	0.00459	1.10652
70	3904.72	98.28	0.71277	0.00501	0.70776					70	3972.35	99.98	1.11111	0.00454	1.10657
71	3960.83	99.69	0.89891	0.00569	0.89322					71	3973.01	100	1.11111	0.00446	1.10665
72	3970.95	99.95	0.92131	0.0048	0.91651					72	3972.67	99.99	1.11111	0.00486	1.10625
73	3917.58	98.6	0.70161	0.00448	0.69713					73	3971.06	99.95	1.11111	0.00443	1.10668
74	3939	99.14	0.83744	0.00386	0.83358					74	3971.46	99.96	1.11111	0.00428	1.10683
75	3833.48	96.49	0.62263	0.00537	0.61726					75	3973	100	1.11111	0.00436	1.10675
76	3850.49	96.92	0.68855	0.00395	0.6846					76	3971.06	99.95	1.11111	0.00508	1.10603
77	3951.02	99.45	0.68989	0.00402	0.68587					77	3973	100	1.11111	0.00495	1.10616
78	3874.2	97.51	0.73429	0.00529	0.729					78	3972.35	99.98	1.11111	0.00495	1.10616
79	3973	100	1.07523	0.00564	1.06959					79	3971.46	99.96	1.11111	0.00515	1.10596
80	3876.06	97.56	0.62207	0.00483	0.61724					80	3973.01	100	1.11111	0.00481	1.1063
81	3949.43	99.41	0.70067	0.00543	0.69524					81	3972.5	99.99	1.11111	0.0047	1.10641
82	3849.66	96.9	0.73899	0.00453	0.73446					82	3970.95	99.95	1.11111	0.00517	1.10594
83	3796.72	95.56	0.58454	0.00531	0.57923					83	3971.46	99.96	1.11111	0.00499	1.10612
84	3867.64	97.35	0.73606	0.00478	0.73128					84	3972.67	99.99	1.11111	0.00375	1.10736
85	3970.09	99.93	0.94518	0.00443	0.94075					85	3970.09	99.93	1.11111	0.00486	1.10625
86	3948.53	99.38	0.80107	0.0046	0.79647					86	3972.5	99.99	1.11111	0.00473	1.10638
87	3948.72	99.39	0.70403	0.00438	0.69965					87	3972.5	99.99	1.11111	0.00422	1.10689
88	3894.79	98.03	0.59332	0.00455	0.58877					88	3971.46	99.96	1.11111	0.00486	1.10625
89	3960.21	99.68	0.74973	0.00469	0.74504					89	3972.35	99.98	1.11111	0.00482	1.10629
90	3970.73	99.94	1.11088	0.00443	1.10645					90	3972.67	99.99	1.11111	0.00423	1.10688
91	3912.58	98.48	0.71263	0.0047	0.70793					91	3972.67	99.99	1.11111	0.00445	1.10666
92	3929.54	98.91	0.69511	0.00476	0.69035					92	3953.61	99.51	1.11111	0.00473	1.10638
93	3942.11	99.22	0.66089	0.00396	0.65693					93	3972.35	99.98	1.11111	0.00421	1.1069
94	3866.29	97.31	0.69236	0.00459	0.68777					94	3972.67	99.99	1.11111	0.005	1.10611
95	3845.44	96.79	0.66948	0.00542	0.66406					95	3972.35	99.98	1.11111	0.00511	1.106
96	3851.78	96.95	0.66038	0.00506	0.65532					96	3972.35	99.98	1.11111	0.00451	1.1066
97	3921.83	98.71	0.80935	0.00471	0.80464					97	3966.53	99.84	1.11111	0.00419	1.10692
98	3803.66	95.74	0.66362	0.00469	0.65893					98	3972.67	99.99	1.11111	0.00501	1.1061
99	3970.09	99.93	0.64299	0.00471	0.63828					99	3970.73	99.94	1.11111	0.00428	1.10683
100	3780.86	95.16	0.72711	0.00329	0.72382					100	3973	100	1.11111	0.00467	1.10644
101	3908.91	98.39	0.63236	0.00458	0.62778					101	3971.98	99.97	1.11111	0.00483	1.10628
102	3971.98	99.97	0.97146	0.00541	0.96605					102	3969.12	99.9	1.11111	0.00387	1.10724
103	3895.98	98.06	0.63531	0.00563	0.62968					103	3972.35	99.98	1.11111	0.00389	1.10722
104	3762.32	94.7	0.66752	0.00459	0.66293					104	3970.41	99.93	1.11111	0.00467	1.10644
105	3972.03	99.98	1.11097	0.00481	1.10616					105	3971.46	99.96	1.11111	0.004	1.10711
106	3972.35	99.98	1.02048	0.00465	1.01583					106	3972.03	99.98	1.11111	0.00503	1.10608
107	3972.35	99.98	1.03452	0.00542	1.0291					107	3971.46	99.96	1.11111	0.00457	1.10654
108	3970.95	99.95	1.11019	0.00462	1.10557					108	3969.12	99.9	1.11111	0.00407	1.10704
109	3968.5	99.89	0.89278	0.0043	0.88848					109	3972.67	99.99	1.11111	0.00558	1.10553
110	3863.91	97.25	0.62921	0.00461	0.6246					110	3973	100	1.11111	0.00443	1.10668
111	3843.02	96.73	0.73802	0.00494	0.73308					111	3972.67	99.99	1.11111	0.00515	1.10596
112	3902.13	98.22	0.72641	0.00426	0.72215					112	3972.67	99.99	1.11111	0.00393	1.10718
113	3854.16	97.01	0.77457	0.00502	0.76955					113	3972.5	99.99	1.11111	0.00416	1.10695
114	3784.37	95.25	0.69459	0.0047	0.68989					114	3972.35	99.98	1.11111	0.00513	1.10598
115	3917.74	98.61	0.6954	0.00521	0.69019					115	3968.88	99.9	1.11111	0.00404	1.10707
116	3972.35	99.98	1.06387	0.00465	1.05922					116	3970.09	99.93	1.11111	0.00467	1.10644
117	3949.41	99.41	0.71835	0.00498	0.71337					117	3968.8	99.89	1.11111	0.0047	1.10641
118	3782.21	95.2	0.65292	0.00502	0.6479					118	3972.5	99.99	1.11111	0.0052	1.10591
119	3918.15	98.62	0.65163	0.00465	0.64698					119	3972.03	99.98	1.11111	0.00482	1.10629
120	3851.52	96.94	0.69273	0.00386	0.68887					120	3973	100	1.11111	0.00532	1.10579
121	3921.31	98.7	0.66948	0.00526	0.66422					121	3972.67	99.99	1.11111	0.00404	1.10707
122	3869.97	97.41	0.65864	0.00445	0.65419					122	3970.09	99.93	1.11111	0.00368	1.10743
123	3821.53	96.19	0.71444	0.00545	0.70899					123	3973	100	1.11111	0.00459	1.10652
124	3972.35	99.98	1.03452	0.00457	1.02995					124	3972.35	99.98	1.11111	0.0053	1.10581
125	3949.73	99.41	0.68243	0.00457	0.67786					125	3972.67	99.99	1.11111	0.00601	1.1051
126	3933.07	98.99	0.69312	0.00439	0.68873					126	3972.5	99.99	1.11111	0.00386	1.10725
127	3970.41	99.93	0.91412	0.00429	0.90983					127	3970.41	99.93	1.11111	0.00432	1.10679
128	3917.18	98.59	0.72846	0.00461	0.72385					128	3973	100	1.11111	0.00504	1.10607
129	3931.43	98.95	0.7223	0.00566	0.71664					129	3972.67	99.99	1.11111	0.00475	1.10636
130	3915.63	98.56	0.84772	0.00547	0.84225					130	3973	100	1.11111	0.00441	1.1067
131	3867.55	97.35	0.69358	0.00582	0.68776					131	3970.41	99.93	1.11111	0.00458	1.10653
132	3866	97.31	0.72042	0.00536	0.71506					132	3973	100	1.11111	0.00443	1.10668
133	3971.98	99.97	1.06324	0.00528	1.05796					133	3973	100	1.11111	0.00512	1.10599
134	3970.73	99.94	1.09974	0.00507	1.09467					134	3972.67	99.99	1.11111	0.00493	1.10618
135	3864.3	97.26	0.69747	0.00422	0.69325					135	3972.67	99.99	1.11111	0.00425	1.10686
136	3927	98.84	0.79996	0.00424	0.79572					136	3973	100	1.11111	0.00424	1.10687
137	3943.38	99.25	0.75886	0.00435	0.75451					137	3973	100	1.11111	0.00493	1.10618
138	3967.84	99.87	0.66697	0.00532	0.66165					138	3972.67	99.99	1.11111	0.0047	1.10641
139	3945.55	99.31	0.81573	0.00513	0.8106					139	3973	100	1.11111	0.00487	1.10624
140	3797.26	95.58	0.68701	0.00517	0.68184					140	3962.67	99.74	1.11111	0.00371	1.1074
141	3872.66	97.47	0.66631	0.00477	0.66154					141	3972.67	99.99	1.11111	0.00439	1.10672
142	3952.33	99.48	0.72658	0.00505	0.72153					142	3963.42	99.76	1.11111	0.00525	1.10586
143	3805.11	95.77	0.74857	0.00486	0.74371					143	3972.67	99.99	1.11111	0.00439	1.10672
144	3933.89	99.02	0.58721	0.00429	0.58292					144	3972.67	99.99	1.11111	0.00454	1.10657
145	3920.28	98.67	0.60596	0.00443	0.60153					145	3969.12	99.9	1.11111	0.00467	1.10644
146	3877.47	97.6	0.69687	0.00521	0.69166					146	3973.01	100	1.11111	0.00526	1.10585
147	3917.89	98.61	0.68805	0.00489	0.68316					147	3972.67	99.99	1.11111	0.00518	1.10593
148	3972.5	99.99	1.10836	0.00432	1.10404					148	3970.41	99.93	1.11111	0.00451	1.1066
149	3879.89	97.66	0.69761	0.00407	0.69354					149	3970.41	99.93	1.11111	0.00447	1.10664
150	3973.01	100	1.00672	0.00446	1.00226					150	3972.67	99.99	1.11111	0.0055	1.10561
151	3973.01	100	1.10948	0.0045	1.10498					151	3970.43	99.94	1.11111	0.00507	1.10604
152	3949.23	99.4	0.62114	0.00467	0.61647					152	3970.41	99.93	1.11111	0.00536	1.10575
153	3972.35	99.98	0.90592	0.00453	0.90139					153	3971.98	99.97	1.11111	0.00449	1.10662
154	3903.32	98.25	0.64302	0.00536	0.63766					154	3972.67	99.99	1.11111	0.00557	1.10554
155	3823.14	96.23	0.63729	0.00411	0.63318					155	3972.67	99.99	1.11111	0.00473	1.10638
156	3848.67	96.87	0.66859	0.0043	0.66429					156	3972.5	99.99	1.11111	0.00438	1.10673
157	3961.64	99.71	0.75105	0.00463	0.74642					157	3973	100	1.11111	0.00436	1.10675
158	3801.22	95.68	0.60748	0.00515	0.60233					158	3973	100	1.11111	0.00418	1.10693
159	3837.18	96.58	0.67758	0.00538	0.6722					159	3973	100	1.11111	0.00437	1.10674
160	3881.1	97.69	0.65195	0.00422	0.64773					160	3972.5	99.99	1.11111	0.00507	1.10604
161	3770.75	94.91	0.72244	0.00477	0.71767					161	3973	100	1.11111	0.00493	1.10618
162	3865.48	97.29	0.69436	0.00428	0.69008					162	3969.44	99.91	1.11111	0.00447	1.10664
163	3963.19	99.75	0.66422	0.00495	0.65927					163	3972.67	99.99	1.11111	0.00495	1.10616
164	3923.46	98.75	0.76075	0.00501	0.75574					164	3970.73	99.94	1.11111	0.00495	1.10616
165	3964.27	99.78	0.84559	0.00516	0.84043					165	3973	100	1.11111	0.00456	1.10655
166	3972.5	99.99	1.10995	0.00454	1.10541					166	3972.35	99.98	1.11111	0.00498	1.10613
167	3968.88	99.9	0.91626	0.00524	0.91102					167	3972.35	99.98	1.11111	0.00496	1.10615
168	3942.44	99.23	0.83929	0.00451	0.83478					168	3971.46	99.96	1.11111	0.005	1.10611
169	3755.86	94.53	0.68065	0.00459	0.67606					169	3971.98	99.97	1.11111	0.00528	1.10583
170	3757.95	94.59	0.66788	0.00375	0.66413					170	3972.03	99.98	1.11111	0.00415	1.10696
171	3910.97	98.44	0.70241	0.00481	0.6976					171	3971.98	99.97	1.11111	0.00532	1.10579
172	3906.84	98.33	0.8496	0.00542	0.84418					172	3972.5	99.99	1.11111	0.0047	1.10641
173	3775.43	95.03	0.63188	0.0043	0.62758					173	3973.01	100	1.11111	0.00547	1.10564
174	3966.88	99.85	0.74533	0.00454	0.74079					174	3972.35	99.98	1.11111	0.005	1.10611
175	3954.72	99.54	0.73167	0.0048	0.72687					175	3973.01	100	1.11111	0.00443	1.10668
176	3967.18	99.85	1.06866	0.00557	1.06309					176	3967.84	99.87	1.11111	0.00534	1.10577
177	3966.86	99.85	1.05505	0.00457	1.05048					177	3972.35	99.98	1.11111	0.00437	1.10674
178	3859.84	97.15	0.70086	0.00492	0.69594					178	3972.35	99.98	1.11111	0.00534	1.10577
179	3888.97	97.88	0.63382	0.00487	0.62895					179	3968.88	99.9	1.11111	0.0041	1.10701
180	3840.94	96.68	0.66105	0.00473	0.65632					180	3970.41	99.93	1.11111	0.00465	1.10646
181	3963.09	99.75	0.85348	0.00386	0.84962					181	3963.3	99.76	1.11111	0.00505	1.10606
182	3781.61	95.18	0.66401	0.0048	0.65921					182	3970.41	99.93	1.11111	0.0048	1.10631
183	3844.65	96.77	0.67415	0.0037	0.67045					183	3972.35	99.98	1.11111	0.00508	1.10603
184	3973	100	1.09963	0.00393	1.0957					184	3971.06	99.95	1.11111	0.00518	1.10593
185	3935.86	99.06	0.72256	0.00487	0.71769					185	3972.67	99.99	1.11111	0.00457	1.10654
186	3709.57	93.37	0.65587	0.0052	0.65067					186	3971.46	99.96	1.11111	0.00482	1.10629
187	3945.61	99.31	0.71039	0.00532	0.70507					187	3970.09	99.93	1.11111	0.00508	1.10603
188	3937.4	99.1	0.69886	0.00481	0.69405					188	3972.67	99.99	1.11111	0.0045	1.10661
189	3963.62	99.76	1.07515	0.00383	1.07132					189	3972.35	99.98	1.11111	0.00489	1.10622
190	3880.47	97.67	0.69618	0.00469	0.69149					190	3973	100	1.11111	0.00417	1.10694
191	3802.04	95.7	0.71004	0.00522	0.70482					191	3973.01	100	1.11111	0.0047	1.10641
192	3972.5	99.99	1.06224	0.00415	1.05809					192	3973	100	1.11111	0.00547	1.10564
193	3854.49	97.02	0.62657	0.00411	0.62246					193	3971.98	99.97	1.11111	0.00467	1.10644
194	3902.04	98.21	0.72786	0.00462	0.72324					194	3972.35	99.98	1.11111	0.00428	1.10683
195	3821.38	96.18	0.6721	0.00493	0.66717					195	3970.95	99.95	1.11111	0.00445	1.10666
196	3880.35	97.67	0.66628	0.00471	0.66157					196	3967.5	99.86	1.11111	0.00479	1.10632
197	3953.7	99.51	0.87362	0.00491	0.86871					197	3973	100	1.11111	0.00492	1.10619
198	3873.49	97.5	0.65294	0.00473	0.64821					198	3972.67	99.99	1.11111	0.00473	1.10638
199	3966.53	99.84	0.6622	0.00499	0.65721					199	3971.98	99.97	1.11111	0.00495	1.10616
200	3914.59	98.53	0.70171	0.00529	0.69642					200	3973	100	1.11111	0.00438	1.10673

## Sheet: 04_MMACO_Seeds(75)
Fast Converegnce Exp							Fast Converegnce Exp			Slow Converegnce Exp							Slow Converegnce Exp
#	CBLF	Quality	Taumax	Taumin	DeltaTauminmax		Global Optimal Solution =	3973.01		#	CBLF	Quality	Taumax	Taumin	DeltaTauminmax		Global Optimal Solution =	3973.01
1	3972.67	99.99	1.05409	0.00494	1.04915		Minimum Optimal Solution =	3732.61		1	3972.67	99.99	1.11111	0.00494	1.10617		Minimum Optimal Solution =	3955.55
2	3899.29	98.14	0.68053	0.00541	0.67512		Mean of Optimal Solution =	3905.88		2	3972.5	99.99	1.11111	0.0045	1.10661		Mean of Optimal Solution =	3971.41
3	3968.36	99.88	1.1106	0.00498	1.10562		Median of Optimal Solution =	3905.88		3	3973.01	100	1.11111	0.00379	1.10732		Median of Optimal Solution =	3971.41
4	3896.68	98.08	0.77151	0.00456	0.76695		Solution Standrad Deviation =	57.4422		4	3971.98	99.97	1.11111	0.00464	1.10647		Solution Standrad Deviation =	2.4125
5	3923.18	98.75	0.67676	0.00432	0.67244		Average Price =	24.355		5	3972.03	99.98	1.11111	0.00395	1.10716		Average Price =	101.04
6	3914.45	98.53	0.68047	0.00434	0.67613		Relability =	15.5		6	3973	100	1.11111	0.00433	1.10678		Relability =	87.5
7	3943.55	99.26	0.66975	0.00525	0.6645		Normalized Price =	157.129		7	3972.67	99.99	1.11111	0.0051	1.10601		Normalized Price =	115.474
8	3972.35	99.98	0.81743	0.00379	0.81364		Average Solution Quality =	98.3104		8	3973	100	1.11111	0.00465	1.10646		Average Solution Quality =	99.9597
9	3895.13	98.04	0.72526	0.00512	0.72014		Average FDC =	-283.347		9	3971.98	99.97	1.11111	0.00434	1.10677		Average FDC =	-163.506
10	3905.8	98.31	0.67564	0.00509	0.67055		Correlation Coefficent =	-1		10	3973	100	1.11111	0.00476	1.10635		Correlation Coefficent =	-0.82489
11	3836.81	96.57	0.60289	0.00443	0.59846		Solution Robustness =	67.9968		11	3973	100	1.11111	0.00432	1.10679		Solution Robustness =	1646.2
12	3972.5	99.99	1.0537	0.00502	1.04868		Performance Rate =	0.0063642		12	3971.06	99.95	1.11111	0.0052	1.10591		Performance Rate =	0.0086599
13	3959.57	99.66	0.7004	0.00532	0.69508		Average Elapsed Time =	1.1508		13	3972.67	99.99	1.11111	0.00391	1.1072		Average Elapsed Time =	4.731
14	3972.67	99.99	0.98101	0.00543	0.97558					14	3973.01	100	1.11111	0.00543	1.10568
15	3828.28	96.36	0.66773	0.00509	0.66264					15	3970.09	99.93	1.11111	0.00452	1.10659
16	3939.01	99.14	0.67219	0.00418	0.66801					16	3972.35	99.98	1.11111	0.00471	1.1064
17	3926.99	98.84	0.78921	0.00536	0.78385					17	3972.5	99.99	1.11111	0.00429	1.10682
18	3973	100	1.10939	0.00409	1.1053					18	3973	100	1.11111	0.0049	1.10621
19	3787.41	95.33	0.67472	0.00513	0.66959					19	3970.73	99.94	1.11111	0.00433	1.10678
20	3788.16	95.35	0.631	0.00525	0.62575					20	3973	100	1.11111	0.00438	1.10673
21	3933.72	99.01	0.63332	0.00529	0.62803					21	3973	100	1.11111	0.00388	1.10723
22	3972.67	99.99	1.10615	0.00367	1.10248					22	3972.67	99.99	1.11111	0.00492	1.10619
23	3966.86	99.85	1.04782	0.0054	1.04242					23	3973.01	100	1.11111	0.00499	1.10612
24	3972.35	99.98	1.10777	0.00499	1.10278					24	3972.35	99.98	1.11111	0.00435	1.10676
25	3800.86	95.67	0.65622	0.00487	0.65135					25	3971.46	99.96	1.11111	0.00448	1.10663
26	3854.04	97.01	0.66881	0.00409	0.66472					26	3972.67	99.99	1.11111	0.00446	1.10665
27	3958.6	99.64	0.67954	0.00498	0.67456					27	3972.5	99.99	1.11111	0.0047	1.10641
28	3881.34	97.69	0.65249	0.00537	0.64712					28	3972.35	99.98	1.11111	0.00469	1.10642
29	3939.93	99.17	0.70316	0.00485	0.69831					29	3973	100	1.11111	0.00493	1.10618
30	3861.86	97.2	0.66577	0.00521	0.66056					30	3970.73	99.94	1.11111	0.00498	1.10613
31	3867.44	97.34	0.67443	0.00552	0.66891					31	3971.06	99.95	1.11111	0.00486	1.10625
32	3930.62	98.93	0.72628	0.0047	0.72158					32	3967.5	99.86	1.11111	0.00442	1.10669
33	3921.31	98.7	0.7357	0.00466	0.73104					33	3972.67	99.99	1.11111	0.00417	1.10694
34	3918.08	98.62	0.73484	0.00458	0.73026					34	3964.59	99.79	1.11111	0.00504	1.10607
35	3965.78	99.82	0.72175	0.00326	0.71849					35	3972.35	99.98	1.11111	0.0044	1.10671
36	3923.9	98.76	0.62971	0.00479	0.62492					36	3955.55	99.56	1.11111	0.00395	1.10716
37	3928.03	98.87	0.82791	0.00468	0.82323					37	3968.36	99.88	1.11111	0.00467	1.10644
38	3933.72	99.01	0.7626	0.00422	0.75838					38	3973.01	100	1.11111	0.00469	1.10642
39	3907.16	98.34	0.68235	0.00442	0.67793					39	3972.35	99.98	1.11111	0.00455	1.10656
40	3943.36	99.25	0.77491	0.00455	0.77036					40	3970.73	99.94	1.11111	0.00432	1.10679
41	3857.3	97.09	0.62016	0.00563	0.61453					41	3971.98	99.97	1.11111	0.00457	1.10654
42	3917.7	98.61	0.82412	0.00455	0.81957					42	3968.88	99.9	1.11111	0.00476	1.10635
43	3846.38	96.81	0.74524	0.00486	0.74038					43	3973.01	100	1.11111	0.00506	1.10605
44	3958.42	99.63	0.67062	0.00457	0.66605					44	3972.35	99.98	1.11111	0.00458	1.10653
45	3860.12	97.16	0.69476	0.00495	0.68981					45	3971.98	99.97	1.11111	0.00488	1.10623
46	3839.3	96.63	0.74672	0.00478	0.74194					46	3972.35	99.98	1.11111	0.00552	1.10559
47	3771.93	94.94	0.72171	0.00492	0.71679					47	3971.98	99.97	1.11111	0.00432	1.10679
48	3919.83	98.66	0.61199	0.00481	0.60718					48	3970.73	99.94	1.11111	0.0048	1.10631
49	3955.02	99.55	0.90374	0.00463	0.89911					49	3965.24	99.8	1.11111	0.00364	1.10747
50	3845.16	96.78	0.68175	0.00498	0.67677					50	3972.5	99.99	1.11111	0.00477	1.10634
51	3797.75	95.59	0.71872	0.00391	0.71481					51	3971.46	99.96	1.11111	0.00447	1.10664
52	3953.19	99.5	0.63048	0.00506	0.62542					52	3972.03	99.98	1.11111	0.00467	1.10644
53	3868.9	97.38	0.65911	0.004	0.65511					53	3972.5	99.99	1.11111	0.0054	1.10571
54	3972.5	99.99	1.00192	0.00472	0.9972					54	3968.36	99.88	1.11111	0.00399	1.10712
55	3732.61	93.95	0.61777	0.00511	0.61266					55	3973.01	100	1.11111	0.00484	1.10627
56	3895.45	98.05	0.60033	0.00457	0.59576					56	3970.41	99.93	1.11111	0.00498	1.10613
57	3793.1	95.47	0.64081	0.00562	0.63519					57	3972.67	99.99	1.11111	0.00415	1.10696
58	3811.12	95.93	0.69714	0.00486	0.69228					58	3971.98	99.97	1.11111	0.00496	1.10615
59	3937.34	99.1	0.66615	0.00511	0.66104					59	3970.41	99.93	1.11111	0.00486	1.10625
60	3908.04	98.36	0.70064	0.0055	0.69514					60	3970.43	99.94	1.11111	0.0046	1.10651
61	3931.14	98.95	0.72241	0.00452	0.71789					61	3972.35	99.98	1.11111	0.00405	1.10706
62	3902.99	98.24	0.656	0.0043	0.6517					62	3972.67	99.99	1.11111	0.00423	1.10688
63	3865.89	97.3	0.73426	0.00427	0.72999					63	3972.67	99.99	1.11111	0.00499	1.10612
64	3824.12	96.25	0.66842	0.00328	0.66514					64	3972.67	99.99	1.11111	0.00396	1.10715
65	3972.5	99.99	0.82159	0.00491	0.81668					65	3973	100	1.11111	0.00445	1.10666
66	3884.61	97.77	0.71136	0.0052	0.70616					66	3972.03	99.98	1.11111	0.00432	1.10679
67	3949.75	99.41	0.68917	0.00505	0.68412					67	3968.36	99.88	1.11111	0.00476	1.10635
68	3893.15	97.99	0.68916	0.00494	0.68422					68	3964.59	99.79	1.11111	0.00436	1.10675
69	3838.32	96.61	0.6723	0.00514	0.66716					69	3972.67	99.99	1.11111	0.00492	1.10619
70	3968.88	99.9	1.092	0.00429	1.08771					70	3971.98	99.97	1.11111	0.00501	1.1061
71	3973.01	100	1.06881	0.0044	1.06441					71	3967.18	99.85	1.11111	0.00482	1.10629
72	3888.45	97.87	0.75117	0.00518	0.74599					72	3973	100	1.11111	0.00454	1.10657
73	3825.15	96.28	0.6429	0.00482	0.63808					73	3973.01	100	1.11111	0.00493	1.10618
74	3972.35	99.98	1.0915	0.00413	1.08737					74	3972.35	99.98	1.11111	0.00474	1.10637
75	3939.41	99.15	0.6433	0.00383	0.63947					75	3969.39	99.91	1.11111	0.00419	1.10692
76	3863.24	97.24	0.68655	0.0043	0.68225					76	3971.98	99.97	1.11111	0.00463	1.10648
77	3967.84	99.87	0.77993	0.00382	0.77611					77	3968.88	99.9	1.11111	0.00455	1.10656
78	3955.34	99.56	0.85848	0.00484	0.85364					78	3972.03	99.98	1.11111	0.00486	1.10625
79	3973.01	100	1.06325	0.00481	1.05844					79	3972.67	99.99	1.11111	0.00494	1.10617
80	3885.42	97.8	0.65759	0.00411	0.65348					80	3972.35	99.98	1.11111	0.0046	1.10651
81	3848.94	96.88	0.64786	0.00474	0.64312					81	3972.35	99.98	1.11111	0.00438	1.10673
82	3971.98	99.97	1.05462	0.0048	1.04982					82	3971.46	99.96	1.11111	0.00495	1.10616
83	3909.42	98.4	0.65292	0.00469	0.64823					83	3972.67	99.99	1.11111	0.00445	1.10666
84	3918.73	98.63	0.71513	0.00373	0.7114					84	3969.39	99.91	1.11111	0.00475	1.10636
85	3886.64	97.83	0.85839	0.00499	0.8534					85	3973.01	100	1.11111	0.00444	1.10667
86	3958.45	99.63	0.72909	0.0045	0.72459					86	3971.98	99.97	1.11111	0.00423	1.10688
87	3918.52	98.63	0.73495	0.00565	0.7293					87	3973.01	100	1.11111	0.00406	1.10705
88	3905.6	98.3	0.7973	0.00464	0.79266					88	3972.35	99.98	1.11111	0.00517	1.10594
89	3908.39	98.37	0.72276	0.00454	0.71822					89	3973	100	1.11111	0.00441	1.1067
90	3957.51	99.61	0.59477	0.00483	0.58994					90	3973.01	100	1.11111	0.00471	1.1064
91	3797.14	95.57	0.69847	0.005	0.69347					91	3970.41	99.93	1.11111	0.00507	1.10604
92	3883.16	97.74	0.70698	0.00497	0.70201					92	3968.36	99.88	1.11111	0.00562	1.10549
93	3972.67	99.99	1.07523	0.00412	1.07111					93	3973	100	1.11111	0.00476	1.10635
94	3949.22	99.4	0.58383	0.00446	0.57937					94	3973	100	1.11111	0.00431	1.1068
95	3891.57	97.95	0.73329	0.00484	0.72845					95	3968.88	99.9	1.11111	0.00444	1.10667
96	3818.78	96.12	0.71129	0.00476	0.70653					96	3972.5	99.99	1.11111	0.00399	1.10712
97	3828.89	96.37	0.62345	0.00421	0.61924					97	3968.36	99.88	1.11111	0.00426	1.10685
98	3844.78	96.77	0.64481	0.00501	0.6398					98	3973	100	1.11111	0.00512	1.10599
99	3959.68	99.66	0.7474	0.00542	0.74198					99	3962.67	99.74	1.11111	0.00461	1.1065
100	3883.57	97.75	0.66787	0.0052	0.66267					100	3970.41	99.93	1.11111	0.00489	1.10622
101	3932.92	98.99	0.65155	0.00526	0.64629					101	3972.35	99.98	1.11111	0.00385	1.10726
102	3870.87	97.43	0.67318	0.00436	0.66882					102	3972.03	99.98	1.11111	0.00546	1.10565
103	3892.85	97.98	0.65232	0.00547	0.64685					103	3972.35	99.98	1.11111	0.005	1.10611
104	3971.06	99.95	1.07521	0.0052	1.07001					104	3973	100	1.11111	0.00445	1.10666
105	3972.67	99.99	1.07201	0.00431	1.0677					105	3972.67	99.99	1.11111	0.00542	1.10569
106	3931.59	98.96	0.81552	0.00458	0.81094					106	3969.39	99.91	1.11111	0.00526	1.10585
107	3861.86	97.2	0.67493	0.00479	0.67014					107	3968.88	99.9	1.11111	0.00439	1.10672
108	3904.16	98.27	0.71417	0.00391	0.71026					108	3972.67	99.99	1.11111	0.00484	1.10627
109	3961.83	99.72	0.74017	0.00509	0.73508					109	3973	100	1.11111	0.00427	1.10684
110	3947.79	99.37	0.63978	0.00464	0.63514					110	3972.35	99.98	1.11111	0.00448	1.10663
111	3939.93	99.17	0.68322	0.00486	0.67836					111	3967.18	99.85	1.11111	0.00407	1.10704
112	3813.61	95.99	0.62913	0.00496	0.62417					112	3970.41	99.93	1.11111	0.0051	1.10601
113	3856.17	97.06	0.64478	0.00425	0.64053					113	3973	100	1.11111	0.00474	1.10637
114	3829.67	96.39	0.61398	0.00498	0.609					114	3972.67	99.99	1.11111	0.00497	1.10614
115	3968.36	99.88	1.10779	0.00514	1.10265					115	3968.88	99.9	1.11111	0.00516	1.10595
116	3972.5	99.99	0.88149	0.00471	0.87678					116	3972.35	99.98	1.11111	0.00417	1.10694
117	3972.67	99.99	1.10834	0.00499	1.10335					117	3971.46	99.96	1.11111	0.00535	1.10576
118	3940.38	99.18	0.75654	0.00531	0.75123					118	3972.67	99.99	1.11111	0.00475	1.10636
119	3856.65	97.07	0.59555	0.00441	0.59114					119	3970.73	99.94	1.11111	0.00388	1.10723
120	3895.26	98.04	0.65239	0.00493	0.64746					120	3973.01	100	1.11111	0.00471	1.1064
121	3924.93	98.79	0.7152	0.00501	0.71019					121	3973	100	1.11111	0.00497	1.10614
122	3816.01	96.05	0.62463	0.00456	0.62007					122	3972.35	99.98	1.11111	0.00469	1.10642
123	3972.67	99.99	0.98455	0.00536	0.97919					123	3965.24	99.8	1.11111	0.0049	1.10621
124	3937.27	99.1	0.70856	0.00392	0.70464					124	3973	100	1.11111	0.0038	1.10731
125	3901	98.19	0.67932	0.0049	0.67442					125	3973	100	1.11111	0.00417	1.10694
126	3973	100	0.98456	0.00517	0.97939					126	3972.35	99.98	1.11111	0.00455	1.10656
127	3881.56	97.7	0.69658	0.00526	0.69132					127	3972.35	99.98	1.11111	0.00435	1.10676
128	3871.68	97.45	0.6527	0.00446	0.64824					128	3970.73	99.94	1.11111	0.00428	1.10683
129	3863.12	97.23	0.62182	0.00479	0.61703					129	3971.98	99.97	1.11111	0.00507	1.10604
130	3868.13	97.36	0.63205	0.00536	0.62669					130	3969.12	99.9	1.11111	0.00471	1.1064
131	3956.84	99.59	0.77905	0.0042	0.77485					131	3972.67	99.99	1.11111	0.00433	1.10678
132	3968.8	99.89	1.1065	0.00423	1.10227					132	3970.09	99.93	1.11111	0.00403	1.10708
133	3903.22	98.24	0.65752	0.00485	0.65267					133	3973	100	1.11111	0.00472	1.10639
134	3830.47	96.41	0.69625	0.00512	0.69113					134	3972.03	99.98	1.11111	0.00447	1.10664
135	3960.72	99.69	0.69456	0.00477	0.68979					135	3968.88	99.9	1.11111	0.00431	1.1068
136	3971.46	99.96	1.08198	0.00499	1.07699					136	3973	100	1.11111	0.00447	1.10664
137	3871.91	97.46	0.70216	0.00462	0.69754					137	3973	100	1.11111	0.00434	1.10677
138	3747.61	94.33	0.7221	0.00443	0.71767					138	3963.19	99.75	1.11111	0.00496	1.10615
139	3972.5	99.99	0.86788	0.00532	0.86256					139	3972.5	99.99	1.11111	0.0045	1.10661
140	3792.33	95.45	0.63428	0.00426	0.63002					140	3971.98	99.97	1.11111	0.00454	1.10657
141	3910.28	98.42	0.66632	0.00378	0.66254					141	3973	100	1.11111	0.00405	1.10706
142	3957.19	99.6	0.59056	0.00505	0.58551					142	3972.67	99.99	1.11111	0.0055	1.10561
143	3943.08	99.25	0.77555	0.0051	0.77045					143	3970.41	99.93	1.11111	0.00539	1.10572
144	3931.61	98.96	0.74827	0.00387	0.7444					144	3969.12	99.9	1.11111	0.00493	1.10618
145	3958.3	99.63	0.81374	0.00496	0.80878					145	3973.01	100	1.11111	0.00476	1.10635
146	3909.66	98.41	0.80257	0.00503	0.79754					146	3972.35	99.98	1.11111	0.00481	1.1063
147	3924.93	98.79	0.69308	0.00499	0.68809					147	3972.35	99.98	1.11111	0.00485	1.10626
148	3971.46	99.96	0.90739	0.00432	0.90307					148	3972.5	99.99	1.11111	0.00431	1.1068
149	3768.53	94.85	0.63157	0.00497	0.6266					149	3973	100	1.11111	0.00491	1.1062
150	3968.36	99.88	1.07739	0.00536	1.07203					150	3971.46	99.96	1.11111	0.00549	1.10562
151	3781.68	95.18	0.63959	0.0048	0.63479					151	3972.67	99.99	1.11111	0.00431	1.1068
152	3973	100	1.08662	0.00526	1.08136					152	3972.35	99.98	1.11111	0.00461	1.1065
153	3880.57	97.67	0.71979	0.00452	0.71527					153	3971.46	99.96	1.11111	0.00453	1.10658
154	3901.54	98.2	0.71389	0.00443	0.70946					154	3971.98	99.97	1.11111	0.0049	1.10621
155	3848.19	96.86	0.74645	0.00451	0.74194					155	3959.42	99.66	1.11111	0.00434	1.10677
156	3876.34	97.57	0.65357	0.00493	0.64864					156	3973.01	100	1.11111	0.00344	1.10767
157	3816.42	96.06	0.71898	0.00403	0.71495					157	3972.67	99.99	1.11111	0.00512	1.10599
158	3913.82	98.51	0.6253	0.0053	0.62					158	3972.67	99.99	1.11111	0.00444	1.10667
159	3971.46	99.96	1.10822	0.00353	1.10469					159	3972.35	99.98	1.11111	0.00468	1.10643
160	3968.47	99.89	0.80981	0.00432	0.80549					160	3971.46	99.96	1.11111	0.00455	1.10656
161	3863.09	97.23	0.73953	0.00386	0.73567					161	3972.67	99.99	1.11111	0.00455	1.10656
162	3943.55	99.26	0.7091	0.00478	0.70432					162	3970.73	99.94	1.11111	0.00533	1.10578
163	3934.04	99.02	0.65221	0.00479	0.64742					163	3971.06	99.95	1.11111	0.00514	1.10597
164	3881.93	97.71	0.77018	0.00479	0.76539					164	3973	100	1.11111	0.00404	1.10707
165	3855.84	97.05	0.65686	0.00507	0.65179					165	3972.35	99.98	1.11111	0.00375	1.10736
166	3972.35	99.98	1.06872	0.00531	1.06341					166	3972.67	99.99	1.11111	0.00435	1.10676
167	3964.59	99.79	0.68854	0.0052	0.68334					167	3972.67	99.99	1.11111	0.00525	1.10586
168	3968.88	99.9	0.82388	0.00439	0.81949					168	3972.67	99.99	1.11111	0.00478	1.10633
169	3923.9	98.76	0.77493	0.00482	0.77011					169	3967.18	99.85	1.11111	0.0044	1.10671
170	3972.67	99.99	1.05408	0.00533	1.04875					170	3968.8	99.89	1.11111	0.00482	1.10629
171	3884.61	97.77	0.73487	0.00486	0.73001					171	3969.12	99.9	1.11111	0.00422	1.10689
172	3852.49	96.97	0.68835	0.00351	0.68484					172	3972.35	99.98	1.11111	0.00353	1.10758
173	3958.54	99.64	0.72673	0.0042	0.72253					173	3973	100	1.11111	0.00472	1.10639
174	3970.95	99.95	0.91861	0.00439	0.91422					174	3972.5	99.99	1.11111	0.00492	1.10619
175	3893.4	98	0.68484	0.00479	0.68005					175	3973.01	100	1.11111	0.00502	1.10609
176	3971.98	99.97	1.02359	0.00403	1.01956					176	3972.5	99.99	1.11111	0.00448	1.10663
177	3970.95	99.95	0.92549	0.00527	0.92022					177	3973.01	100	1.11111	0.00498	1.10613
178	3865.55	97.3	0.6881	0.00437	0.68373					178	3972.03	99.98	1.11111	0.00424	1.10687
179	3807.03	95.82	0.63757	0.00361	0.63396					179	3972.67	99.99	1.11111	0.00527	1.10584
180	3920.8	98.69	0.69633	0.0049	0.69143					180	3970.09	99.93	1.11111	0.00512	1.10599
181	3900.72	98.18	0.66184	0.00507	0.65677					181	3972.03	99.98	1.11111	0.00478	1.10633
182	3854.81	97.02	0.62491	0.00464	0.62027					182	3972.67	99.99	1.11111	0.00419	1.10692
183	3927.52	98.85	0.63507	0.00503	0.63004					183	3973.01	100	1.11111	0.00455	1.10656
184	3885.01	97.78	0.62677	0.00456	0.62221					184	3972.5	99.99	1.11111	0.00474	1.10637
185	3964.59	99.79	0.62829	0.00469	0.6236					185	3973	100	1.11111	0.00508	1.10603
186	3853.53	96.99	0.75042	0.00444	0.74598					186	3972.35	99.98	1.11111	0.00457	1.10654
187	3898.67	98.13	0.86137	0.00468	0.85669					187	3973.01	100	1.11111	0.00485	1.10626
188	3957.5	99.61	0.86728	0.00505	0.86223					188	3971.46	99.96	1.11111	0.00496	1.10615
189	3946.13	99.32	0.66835	0.00492	0.66343					189	3972.35	99.98	1.11111	0.00512	1.10599
190	3927.55	98.86	0.67825	0.00465	0.6736					190	3971.06	99.95	1.11111	0.00543	1.10568
191	3915.8	98.56	0.69092	0.00441	0.68651					191	3971.98	99.97	1.11111	0.00486	1.10625
192	3888.44	97.87	0.71855	0.00541	0.71314					192	3969.44	99.91	1.11111	0.00454	1.10657
193	3962.8	99.74	0.90265	0.00484	0.89781					193	3965.56	99.81	1.11111	0.00515	1.10596
194	3830.16	96.4	0.60466	0.0042	0.60046					194	3971.46	99.96	1.11111	0.00356	1.10755
195	3797.96	95.59	0.66698	0.00351	0.66347					195	3970.73	99.94	1.11111	0.00463	1.10648
196	3971.46	99.96	1.10311	0.00367	1.09944					196	3971.98	99.97	1.11111	0.00435	1.10676
197	3933.55	99.01	0.67713	0.00503	0.6721					197	3970.41	99.93	1.11111	0.00503	1.10608
198	3855.15	97.03	0.72823	0.00436	0.72387					198	3971.46	99.96	1.11111	0.00472	1.10639
199	3878.92	97.63	0.63792	0.00455	0.63337					199	3972.67	99.99	1.11111	0.00511	1.106
200	3809.64	95.89	0.67957	0.0048	0.67477					200	3972.35	99.98	1.11111	0.00477	1.10634

## Sheet: 05_MMACO_Seeds(111)
Fast Converegnce Exp							Fast Converegnce Exp			Slow Converegnce Exp							Slow Converegnce Exp
#	CBLF	Quality	Taumax	Taumin	DeltaTauminmax		Global Optimal Solution =	3973		#	CBLF	Quality	Taumax	Taumin	DeltaTauminmax		Global Optimal Solution =	3973.01
1	3889.62	97.9	0.73079	0.005	0.72579		Minimum Optimal Solution=	3702.34		1	3972.03	99.98	1.11111	0.005	1.10611		Minimum Optimal Solution =	3961.69
2	3935.83	99.06	0.66999	0.00503	0.66496		Mean of Optimal Solution =	3900.04		2	3969.39	99.91	1.11111	0.00369	1.10742		Mean of Optimal Solution =	3971.64
3	3943.8	99.26	0.6198	0.00462	0.61518		Median of Optimal Solution =	3900.04		3	3972.5	99.99	1.11111	0.00522	1.10589		Median of Optimal Solution =	3971.64
4	3806.79	95.82	0.62292	0.00418	0.61874		Solution Standrad Deviation=	59.0227		4	3972.5	99.99	1.11111	0.00417	1.10694		Solution Standrad Deviation =	1.8272
5	3971.46	99.96	0.90827	0.00505	0.90322		Average Price =	22.015		5	3968.36	99.88	1.11111	0.00482	1.10629		Average Price =	99.545
6	3931.33	98.95	0.67509	0.00509	0.67		Relability =	14		6	3972.35	99.98	1.11111	0.00438	1.10673		Relability =	91
7	3871.61	97.45	0.70917	0.00391	0.70526		Normalized Price =	157.25		7	3972.5	99.99	1.11111	0.00507	1.10604		Normalized Price =	109.39
8	3923.88	98.76	0.75897	0.00493	0.75404		Average Solution Quality =	98.1633		8	3973.01	100	1.11111	0.00484	1.10627		Average Solution Quality =	99.9655
9	3972.35	99.98	1.08661	0.00507	1.08154		Average FDC =	-301		9	3972.03	99.98	1.11111	0.0048	1.10631		Average FDC =	-166.828
10	3972.35	99.98	1.01925	0.00498	1.01427		Correlation Coefficent =	-1		10	3972.03	99.98	1.11111	0.00414	1.10697		Correlation Coefficent =	-0.81762
11	3941.99	99.22	0.56222	0.00479	0.55743		Solution Robustness =	66.077		11	3971.46	99.96	1.11111	0.00376	1.10735		Solution Robustness =	2173.67
12	3945.2	99.3	0.8357	0.00477	0.83093		Performance Rate =	0.0063593		12	3972.5	99.99	1.11111	0.00393	1.10718		Performance Rate =	0.0091416
13	3907.87	98.36	0.83177	0.00455	0.82722		Average Elapsed Time =	1.0335		13	3972.67	99.99	1.11111	0.00444	1.10667		Average Elapsed Time =	4.5421
14	3973	100	1.0981	0.00436	1.09374					14	3973.01	100	1.11111	0.00444	1.10667
15	3921.06	98.69	0.72653	0.00495	0.72158					15	3972.5	99.99	1.11111	0.00505	1.10606
16	3943.55	99.26	0.67357	0.00468	0.66889					16	3971.98	99.97	1.11111	0.00485	1.10626
17	3940.77	99.19	0.70237	0.00478	0.69759					17	3972.67	99.99	1.11111	0.00468	1.10643
18	3972.67	99.99	1.00356	0.00492	0.99864					18	3972.35	99.98	1.11111	0.00485	1.10626
19	3973	100	0.96213	0.00445	0.95768					19	3971.46	99.96	1.11111	0.00392	1.10719
20	3940.96	99.19	0.74566	0.00504	0.74062					20	3972.35	99.98	1.11111	0.00486	1.10625
21	3945.2	99.3	0.66194	0.00457	0.65737					21	3972.35	99.98	1.11111	0.00519	1.10592
22	3929.76	98.91	0.75744	0.00457	0.75287					22	3972.35	99.98	1.11111	0.00474	1.10637
23	3894.74	98.03	0.73403	0.00522	0.72881					23	3972.67	99.99	1.11111	0.00412	1.10699
24	3933.84	99.01	0.67283	0.00479	0.66804					24	3972.67	99.99	1.11111	0.00515	1.10596
25	3785.07	95.27	0.72957	0.00509	0.72448					25	3966.29	99.83	1.11111	0.00428	1.10683
26	3971.46	99.96	0.91839	0.00424	0.91415					26	3961.68	99.71	1.11111	0.00533	1.10578
27	3941.68	99.21	0.77053	0.00568	0.76485					27	3972.03	99.98	1.11111	0.00462	1.10649
28	3874.78	97.53	0.77846	0.005	0.77346					28	3969.12	99.9	1.11111	0.00474	1.10637
29	3801.16	95.67	0.6757	0.00541	0.67029					29	3970.73	99.94	1.11111	0.00403	1.10708
30	3851.23	96.93	0.6719	0.0053	0.6666					30	3972.67	99.99	1.11111	0.0052	1.10591
31	3874.15	97.51	0.73686	0.00446	0.7324					31	3972.67	99.99	1.11111	0.0046	1.10651
32	3930.48	98.93	0.61733	0.00481	0.61252					32	3972.67	99.99	1.11111	0.00518	1.10593
33	3780.6	95.16	0.64423	0.00454	0.63969					33	3971.46	99.96	1.11111	0.00505	1.10606
34	3880.47	97.67	0.65212	0.00419	0.64793					34	3973	100	1.11111	0.00514	1.10597
35	3910.3	98.42	0.71648	0.00506	0.71142					35	3972.35	99.98	1.11111	0.00426	1.10685
36	3940.44	99.18	0.75015	0.00528	0.74487					36	3972.35	99.98	1.11111	0.0048	1.10631
37	3886.95	97.83	0.6308	0.0052	0.6256					37	3973.01	100	1.11111	0.0045	1.10661
38	3938.19	99.12	0.67021	0.0044	0.66581					38	3972.67	99.99	1.11111	0.00429	1.10682
39	3889.78	97.91	0.81008	0.00375	0.80633					39	3972.5	99.99	1.11111	0.00493	1.10618
40	3913.56	98.5	0.69009	0.00547	0.68462					40	3972.35	99.98	1.11111	0.00474	1.10637
41	3933.04	98.99	0.62134	0.00382	0.61752					41	3972.5	99.99	1.11111	0.00503	1.10608
42	3745.44	94.27	0.70503	0.00532	0.69971					42	3970.73	99.94	1.11111	0.0041	1.10701
43	3868.61	97.37	0.73854	0.00488	0.73366					43	3970.73	99.94	1.11111	0.00487	1.10624
44	3967.18	99.85	1.05801	0.00404	1.05397					44	3972.35	99.98	1.11111	0.00434	1.10677
45	3971.46	99.96	0.98539	0.00442	0.98097					45	3972.35	99.98	1.11111	0.00456	1.10655
46	3871.46	97.44	0.85568	0.00507	0.85061					46	3972.35	99.98	1.11111	0.00509	1.10602
47	3912.01	98.46	0.66114	0.0043	0.65684					47	3972.35	99.98	1.11111	0.00517	1.10594
48	3899.08	98.14	0.65439	0.00537	0.64902					48	3973.01	100	1.11111	0.00512	1.10599
49	3973	100	1.04595	0.0053	1.04065					49	3964.92	99.8	1.11111	0.00436	1.10675
50	3845.83	96.8	0.69579	0.00452	0.69127					50	3972.35	99.98	1.11111	0.00452	1.10659
51	3939.41	99.15	0.75338	0.00463	0.74875					51	3971.85	99.97	1.11111	0.00516	1.10595
52	3834.46	96.51	0.70068	0.00474	0.69594					52	3972.67	99.99	1.11111	0.00419	1.10692
53	3863.16	97.24	0.69352	0.00432	0.6892					53	3971.06	99.95	1.11111	0.00396	1.10715
54	3962.98	99.75	0.99117	0.00456	0.98661					54	3972.5	99.99	1.11111	0.00497	1.10614
55	3902.51	98.23	0.61434	0.00571	0.60863					55	3973.01	100	1.11111	0.00458	1.10653
56	3970.73	99.94	1.0687	0.00426	1.06444					56	3968.88	99.9	1.11111	0.00455	1.10656
57	3938.24	99.12	0.69995	0.00397	0.69598					57	3968.36	99.88	1.11111	0.00466	1.10645
58	3790	95.39	0.68766	0.00537	0.68229					58	3972.67	99.99	1.11111	0.00518	1.10593
59	3874.27	97.51	0.67224	0.00453	0.66771					59	3972.35	99.98	1.11111	0.00393	1.10718
60	3915.24	98.55	0.68168	0.00516	0.67652					60	3972.67	99.99	1.11111	0.0049	1.10621
61	3971.98	99.97	1.0725	0.00388	1.06862					61	3973.01	100	1.11111	0.00446	1.10665
62	3835.59	96.54	0.67471	0.00399	0.67072					62	3972.35	99.98	1.11111	0.00511	1.106
63	3879.29	97.64	0.66677	0.00531	0.66146					63	3973	100	1.11111	0.0045	1.10661
64	3852.25	96.96	0.70743	0.00482	0.70261					64	3972.03	99.98	1.11111	0.00428	1.10683
65	3956.95	99.6	0.65491	0.00448	0.65043					65	3972.35	99.98	1.11111	0.00422	1.10689
66	3952.57	99.49	0.67879	0.00537	0.67342					66	3968.88	99.9	1.11111	0.00432	1.10679
67	3917.7	98.61	0.7248	0.00449	0.72031					67	3970.41	99.93	1.11111	0.00389	1.10722
68	3839.54	96.64	0.63999	0.00456	0.63543					68	3963.62	99.76	1.11111	0.00474	1.10637
69	3893.91	98.01	0.65133	0.00461	0.64672					69	3972.67	99.99	1.11111	0.00501	1.1061
70	3850.17	96.91	0.65538	0.00454	0.65084					70	3972.5	99.99	1.11111	0.00472	1.10639
71	3918.72	98.63	0.67012	0.00409	0.66603					71	3971.06	99.95	1.11111	0.00454	1.10657
72	3818.52	96.11	0.67723	0.00475	0.67248					72	3972.67	99.99	1.11111	0.00349	1.10762
73	3973	100	1.10777	0.00472	1.10305					73	3973	100	1.11111	0.00475	1.10636
74	3781.21	95.17	0.72502	0.00456	0.72046					74	3970.41	99.93	1.11111	0.00497	1.10614
75	3969.14	99.9	1.00712	0.00488	1.00224					75	3972.67	99.99	1.11111	0.00527	1.10584
76	3970.73	99.94	1.03225	0.0047	1.02755					76	3972.5	99.99	1.11111	0.00376	1.10735
77	3924.93	98.79	0.70129	0.00479	0.6965					77	3973.01	100	1.11111	0.00479	1.10632
78	3789.55	95.38	0.63538	0.00406	0.63132					78	3972.67	99.99	1.11111	0.00417	1.10694
79	3800.34	95.65	0.62092	0.0045	0.61642					79	3973	100	1.11111	0.00451	1.1066
80	3941.99	99.22	0.67303	0.00422	0.66881					80	3972.67	99.99	1.11111	0.00423	1.10688
81	3847.56	96.84	0.73173	0.00446	0.72727					81	3971.46	99.96	1.11111	0.005	1.10611
82	3860.05	97.16	0.68086	0.00379	0.67707					82	3972.35	99.98	1.11111	0.00466	1.10645
83	3873.43	97.49	0.7855	0.00469	0.78081					83	3972.67	99.99	1.11111	0.0049	1.10621
84	3872.72	97.48	0.70144	0.00473	0.69671					84	3969.39	99.91	1.11111	0.00374	1.10737
85	3897.05	98.09	0.64764	0.00493	0.64271					85	3972.5	99.99	1.11111	0.00451	1.1066
86	3909.35	98.4	0.70974	0.00446	0.70528					86	3972.35	99.98	1.11111	0.00404	1.10707
87	3859.85	97.15	0.71589	0.00444	0.71145					87	3972.67	99.99	1.11111	0.00444	1.10667
88	3971.98	99.97	0.8621	0.00455	0.85755					88	3972.35	99.98	1.11111	0.005	1.10611
89	3932.92	98.99	0.70845	0.00445	0.704					89	3972.67	99.99	1.11111	0.00488	1.10623
90	3924.93	98.79	0.70247	0.00496	0.69751					90	3966.86	99.85	1.11111	0.00494	1.10617
91	3867.35	97.34	0.67828	0.00562	0.67266					91	3971.46	99.96	1.11111	0.00468	1.10643
92	3863.11	97.23	0.66318	0.00496	0.65822					92	3972.67	99.99	1.11111	0.00472	1.10639
93	3908.45	98.38	0.66708	0.00443	0.66265					93	3969.39	99.91	1.11111	0.00511	1.106
94	3927	98.84	0.79859	0.00475	0.79384					94	3971.98	99.97	1.11111	0.00433	1.10678
95	3829.15	96.38	0.64641	0.00434	0.64207					95	3967.5	99.86	1.11111	0.00467	1.10644
96	3836.1	96.55	0.60832	0.00477	0.60355					96	3972.35	99.98	1.11111	0.00463	1.10648
97	3826.44	96.31	0.70409	0.00537	0.69872					97	3971.46	99.96	1.11111	0.00392	1.10719
98	3971.46	99.96	1.04918	0.00487	1.04431					98	3972.67	99.99	1.11111	0.00464	1.10647
99	3873.67	97.5	0.61798	0.00404	0.61394					99	3972.35	99.98	1.11111	0.00477	1.10634
100	3951.02	99.45	0.76986	0.00472	0.76514					100	3969.39	99.91	1.11111	0.00511	1.106
101	3956.51	99.58	0.64935	0.00391	0.64544					101	3973	100	1.11111	0.0034	1.10771
102	3939.93	99.17	0.6742	0.00437	0.66983					102	3972.67	99.99	1.11111	0.00371	1.1074
103	3924.93	98.79	0.70715	0.00428	0.70287					103	3972.35	99.98	1.11111	0.0047	1.10641
104	3972.67	99.99	1.1056	0.00489	1.10071					104	3972.5	99.99	1.11111	0.00441	1.1067
105	3947.88	99.37	0.60403	0.00514	0.59889					105	3973.01	100	1.11111	0.00477	1.10634
106	3842.89	96.72	0.63576	0.0054	0.63036					106	3968.88	99.9	1.11111	0.0053	1.10581
107	3862.38	97.22	0.76863	0.00435	0.76428					107	3972.35	99.98	1.11111	0.00496	1.10615
108	3860.19	97.16	0.6595	0.00476	0.65474					108	3971.06	99.95	1.11111	0.00479	1.10632
109	3898.44	98.12	0.72039	0.0046	0.71579					109	3972.35	99.98	1.11111	0.00524	1.10587
110	3877.52	97.6	0.71593	0.00555	0.71038					110	3972.67	99.99	1.11111	0.0045	1.10661
111	3967.18	99.85	1.11048	0.00564	1.10484					111	3969.39	99.91	1.11111	0.00519	1.10592
112	3955.44	99.56	0.63769	0.00502	0.63267					112	3971.06	99.95	1.11111	0.0042	1.10691
113	3910.64	98.43	0.80983	0.00362	0.80621					113	3972.03	99.98	1.11111	0.00588	1.10523
114	3953.28	99.5	0.72289	0.00484	0.71805					114	3970.73	99.94	1.11111	0.00565	1.10546
115	3776.36	95.05	0.70267	0.00428	0.69839					115	3970.41	99.93	1.11111	0.00398	1.10713
116	3973	100	1.01903	0.00494	1.01409					116	3972.03	99.98	1.11111	0.00352	1.10759
117	3929.28	98.9	0.71399	0.00518	0.70881					117	3973	100	1.11111	0.0036	1.10751
118	3731.24	93.91	0.6685	0.00465	0.66385					118	3972.67	99.99	1.11111	0.00483	1.10628
119	3891.28	97.94	0.63696	0.00427	0.63269					119	3973	100	1.11111	0.00462	1.10649
120	3785.46	95.28	0.67154	0.00511	0.66643					120	3971.46	99.96	1.11111	0.00412	1.10699
121	3859.79	97.15	0.66666	0.00476	0.6619					121	3973	100	1.11111	0.00534	1.10577
122	3929.69	98.91	0.71645	0.00513	0.71132					122	3972.35	99.98	1.11111	0.00453	1.10658
123	3909.93	98.41	0.62477	0.00431	0.62046					123	3972.35	99.98	1.11111	0.005	1.10611
124	3972.5	99.99	1.04329	0.00531	1.03798					124	3968.36	99.88	1.11111	0.00471	1.1064
125	3972.67	99.99	1.06167	0.00491	1.05676					125	3970.41	99.93	1.11111	0.00414	1.10697
126	3972.03	99.98	1.10949	0.00508	1.10441					126	3972.67	99.99	1.11111	0.00491	1.1062
127	3884.77	97.78	0.68411	0.00515	0.67896					127	3973.01	100	1.11111	0.00445	1.10666
128	3801.51	95.68	0.70047	0.00494	0.69553					128	3970.09	99.93	1.11111	0.00475	1.10636
129	3873.41	97.49	0.81723	0.00457	0.81266					129	3965.56	99.81	1.11111	0.00412	1.10699
130	3877.89	97.61	0.86983	0.00392	0.86591					130	3966.86	99.85	1.11111	0.0047	1.10641
131	3909.01	98.39	0.70511	0.00521	0.6999					131	3973	100	1.11111	0.00336	1.10775
132	3953.7	99.51	0.7194	0.00467	0.71473					132	3972.67	99.99	1.11111	0.00426	1.10685
133	3972.03	99.98	1.11095	0.00493	1.10602					133	3968.8	99.89	1.11111	0.00477	1.10634
134	3928.35	98.88	0.66209	0.00535	0.65674					134	3969.39	99.91	1.11111	0.00531	1.1058
135	3917.55	98.6	0.67467	0.00415	0.67052					135	3973	100	1.11111	0.00439	1.10672
136	3933.2	99	0.6247	0.00471	0.61999					136	3972.35	99.98	1.11111	0.00492	1.10619
137	3867.05	97.33	0.63225	0.00451	0.62774					137	3968.8	99.89	1.11111	0.00459	1.10652
138	3927	98.84	0.74977	0.00541	0.74436					138	3973	100	1.11111	0.00445	1.10666
139	3972.03	99.98	1.04414	0.00445	1.03969					139	3972.67	99.99	1.11111	0.00483	1.10628
140	3892.44	97.97	0.66844	0.00395	0.66449					140	3973	100	1.11111	0.00402	1.10709
141	3969.91	99.92	0.96447	0.00482	0.95965					141	3972.5	99.99	1.11111	0.00465	1.10646
142	3920.8	98.69	0.69033	0.00396	0.68637					142	3973	100	1.11111	0.0046	1.10651
143	3898.99	98.14	0.64968	0.00503	0.64465					143	3972.67	99.99	1.11111	0.0048	1.10631
144	3847.79	96.85	0.69498	0.00447	0.69051					144	3972.35	99.98	1.11111	0.00449	1.10662
145	3954.92	99.54	0.69933	0.00536	0.69397					145	3973	100	1.11111	0.00459	1.10652
146	3902.7	98.23	0.64985	0.005	0.64485					146	3972.5	99.99	1.11111	0.00462	1.10649
147	3939.48	99.16	0.62939	0.00489	0.6245					147	3970.41	99.93	1.11111	0.00471	1.1064
148	3922.26	98.72	0.69738	0.00522	0.69216					148	3972.67	99.99	1.11111	0.00434	1.10677
149	3791.82	95.44	0.66283	0.00471	0.65812					149	3972.67	99.99	1.11111	0.00436	1.10675
150	3942.76	99.24	0.73294	0.00411	0.72883					150	3971.46	99.96	1.11111	0.00542	1.10569
151	3938.42	99.13	0.64623	0.00528	0.64095					151	3972.67	99.99	1.11111	0.00519	1.10592
152	3933.2	99	0.73799	0.00412	0.73387					152	3972.5	99.99	1.11111	0.00459	1.10652
153	3971.98	99.97	1.05529	0.0045	1.05079					153	3972.67	99.99	1.11111	0.00528	1.10583
154	3927.46	98.85	0.63333	0.00515	0.62818					154	3973.01	100	1.11111	0.00408	1.10703
155	3896.5	98.07	0.77019	0.00495	0.76524					155	3972.35	99.98	1.11111	0.00381	1.1073
156	3822.97	96.22	0.64841	0.00577	0.64264					156	3970.09	99.93	1.11111	0.00465	1.10646
157	3966.86	99.85	0.79297	0.00407	0.7889					157	3972.35	99.98	1.11111	0.005	1.10611
158	3955.44	99.56	0.82898	0.00464	0.82434					158	3972.03	99.98	1.11111	0.00471	1.1064
159	3914.89	98.54	0.62925	0.00421	0.62504					159	3972.35	99.98	1.11111	0.00387	1.10724
160	3802.36	95.7	0.7007	0.00504	0.69566					160	3972.67	99.99	1.11111	0.00426	1.10685
161	3925.08	98.79	0.71034	0.00492	0.70542					161	3972.35	99.98	1.11111	0.00425	1.10686
162	3891.38	97.95	0.74488	0.00473	0.74015					162	3972.35	99.98	1.11111	0.00527	1.10584
163	3825.15	96.28	0.615	0.00482	0.61018					163	3965.78	99.82	1.11111	0.00455	1.10656
164	3786.9	95.32	0.66113	0.00549	0.65564					164	3971.98	99.97	1.11111	0.00483	1.10628
165	3806.57	95.81	0.73315	0.0044	0.72875					165	3969.44	99.91	1.11111	0.00489	1.10622
166	3884.61	97.77	0.64993	0.00445	0.64548					166	3972.35	99.98	1.11111	0.00465	1.10646
167	3902.55	98.23	0.68843	0.00506	0.68337					167	3972.67	99.99	1.11111	0.00424	1.10687
168	3888.34	97.87	0.63264	0.00485	0.62779					168	3972.35	99.98	1.11111	0.00543	1.10568
169	3846.43	96.81	0.67743	0.00554	0.67189					169	3971.46	99.96	1.11111	0.00512	1.10599
170	3936.31	99.08	0.79981	0.00532	0.79449					170	3972.5	99.99	1.11111	0.00488	1.10623
171	3826.39	96.31	0.69146	0.00475	0.68671					171	3971.46	99.96	1.11111	0.0054	1.10571
172	3963.42	99.76	0.71588	0.0046	0.71128					172	3971.98	99.97	1.11111	0.00445	1.10666
173	3934.42	99.03	0.68444	0.00545	0.67899					173	3973	100	1.11111	0.00502	1.10609
174	3879.28	97.64	0.73505	0.00452	0.73053					174	3973	100	1.11111	0.00528	1.10583
175	3859.57	97.14	0.69261	0.00484	0.68777					175	3972.03	99.98	1.11111	0.00482	1.10629
176	3896.52	98.07	0.68136	0.00512	0.67624					176	3972.03	99.98	1.11111	0.00446	1.10665
177	3702.34	93.19	0.65253	0.00424	0.64829					177	3972.35	99.98	1.11111	0.00506	1.10605
178	3928.52	98.88	0.70213	0.00474	0.69739					178	3973	100	1.11111	0.00444	1.10667
179	3896.61	98.08	0.6896	0.00513	0.68447					179	3972.35	99.98	1.11111	0.00395	1.10716
180	3817.88	96.1	0.69115	0.00501	0.68614					180	3972.5	99.99	1.11111	0.00425	1.10686
181	3758.25	94.59	0.68123	0.00491	0.67632					181	3972.35	99.98	1.11111	0.00501	1.1061
182	3958.27	99.63	0.65005	0.00517	0.64488					182	3971.98	99.97	1.11111	0.00509	1.10602
183	3802.92	95.72	0.61507	0.00523	0.60984					183	3970.41	99.93	1.11111	0.00447	1.10664
184	3925.81	98.81	0.66193	0.00458	0.65735					184	3971.06	99.95	1.11111	0.00526	1.10585
185	3966.53	99.84	0.76782	0.00497	0.76285					185	3969.44	99.91	1.11111	0.00416	1.10695
186	3781.1	95.17	0.60212	0.00459	0.59753					186	3970.73	99.94	1.11111	0.00491	1.1062
187	3927.34	98.85	0.61819	0.00496	0.61323					187	3972.67	99.99	1.11111	0.00444	1.10667
188	3853.54	96.99	0.65388	0.00495	0.64893					188	3971.46	99.96	1.11111	0.00488	1.10623
189	3943.26	99.25	0.68523	0.00526	0.67997					189	3971.06	99.95	1.11111	0.00468	1.10643
190	3915.15	98.54	0.71356	0.00496	0.7086					190	3973	100	1.11111	0.00496	1.10615
191	3893.99	98.01	0.70357	0.00426	0.69931					191	3967.18	99.85	1.11111	0.00534	1.10577
192	3890.88	97.93	0.71917	0.00412	0.71505					192	3972.35	99.98	1.11111	0.00424	1.10687
193	3971.46	99.96	1.10367	0.00478	1.09889					193	3972.67	99.99	1.11111	0.00418	1.10693
194	3904.4	98.27	0.67087	0.00556	0.66531					194	3973	100	1.11111	0.00497	1.10614
195	3972.35	99.98	0.86073	0.00405	0.85668					195	3969.39	99.91	1.11111	0.00533	1.10578
196	3971.46	99.96	1.07972	0.00511	1.07461					196	3972.35	99.98	1.11111	0.00437	1.10674
197	3923.58	98.76	0.84425	0.0044	0.83985					197	3972.5	99.99	1.11111	0.00455	1.10656
198	3778.11	95.09	0.64448	0.00395	0.64053					198	3972.67	99.99	1.11111	0.00495	1.10616
199	3920.64	98.68	0.65538	0.00511	0.65027					199	3970.73	99.94	1.11111	0.0047	1.10641
200	3873.23	97.49	0.58434	0.00473	0.57961					200	3972.35	99.98	1.11111	0.0044	1.10671

## Sheet: 06_MMACO_Seeds(200)
Fast Converegnce Exp							Fast Converegnce Exp			Slow Converegnce Exp							Slow Converegnce Exp
#	CBLF	Quality	Taumax	Taumin	DeltaTauminmax		Global Optimal Solution =	3973.01		#	CBLF	Quality	Taumax	Taumin	DeltaTauminmax		Global Optimal Solution =	3973.01
1	3893.09	97.99	0.69572	0.00514	0.69058		Minimum Optimal Solution =	3633.1		1	3973	100	1.11111	0.00514	1.10597		Minimum Optimal Solution =	3959.75
2	3964.74	99.79	0.82334	0.00491	0.81843		Mean of Optimal Solution =	3903.71		2	3970.09	99.93	1.11111	0.00449	1.10662		Mean of Optimal Solution =	3971.5
3	3895.4	98.05	0.71898	0.004	0.71498		Median of Optimal Solution =	3903.71		3	3972.35	99.98	1.11111	0.00413	1.10698		Median of Optimal Solution =	3971.5
4	3952.33	99.48	0.72207	0.00493	0.71714		Solution Standrad Deviation =	65.1139		4	3971.46	99.96	1.11111	0.00465	1.10646		Solution Standrad Deviation =	2.2622
5	3854.02	97.01	0.68854	0.00455	0.68399		Average Price =	24.57		5	3972.67	99.99	1.11111	0.00472	1.10639		Average Price =	100.78
6	3742.52	94.2	0.69401	0.00494	0.68907		Relability =	16		6	3971.98	99.97	1.11111	0.00415	1.10696		Relability =	89.5
7	3897.4	98.1	0.66182	0.00495	0.65687		Normalized Price =	153.562		7	3972.5	99.99	1.11111	0.00477	1.10634		Normalized Price =	112.603
8	3971.98	99.97	1.10822	0.00327	1.10495		Average Solution Quality =	98.2556		8	3973	100	1.11111	0.00397	1.10714		Average Solution Quality =	99.9619
9	3921.5	98.7	0.656	0.00475	0.65125		Average FDC =	-287.206		9	3972.35	99.98	1.11111	0.0044	1.10671		Average FDC =	-171.943
10	3843.77	96.75	0.62771	0.00408	0.62363		Correlation Coefficent =	-1		10	3972.03	99.98	1.11111	0.00487	1.10624		Correlation Coefficent =	-0.82717
11	3973	100	0.98018	0.00386	0.97632		Solution Robustness =	59.952		11	3973	100	1.11111	0.00474	1.10637		Solution Robustness =	1755.59
12	3811.71	95.94	0.6116	0.00523	0.60637		Performance Rate =	0.006512		12	3973.01	100	1.11111	0.00416	1.10695		Performance Rate =	0.0088807
13	3887.19	97.84	0.59205	0.00532	0.58673		Average Elapsed Time =	1.1842		13	3972.67	99.99	1.11111	0.00498	1.10613		Average Elapsed Time =	4.5905
14	3796.67	95.56	0.62507	0.00474	0.62033					14	3973	100	1.11111	0.00522	1.10589
15	3815.85	96.04	0.6936	0.00505	0.68855					15	3972.67	99.99	1.11111	0.00453	1.10658
16	3822.4	96.21	0.68553	0.0048	0.68073					16	3973.01	100	1.11111	0.00547	1.10564
17	3897.17	98.09	0.65438	0.00366	0.65072					17	3972.5	99.99	1.11111	0.00409	1.10702
18	3972.67	99.99	1.10255	0.00445	1.0981					18	3972.67	99.99	1.11111	0.00444	1.10667
19	3697.4	93.06	0.67293	0.00511	0.66782					19	3972.5	99.99	1.11111	0.00497	1.10614
20	3842.21	96.71	0.66625	0.00446	0.66179					20	3972.5	99.99	1.11111	0.00488	1.10623
21	3876.34	97.57	0.80327	0.00488	0.79839					21	3968.36	99.88	1.11111	0.00492	1.10619
22	3912.53	98.48	0.78711	0.00477	0.78234					22	3972.5	99.99	1.11111	0.00489	1.10622
23	3873.6	97.5	0.6741	0.00409	0.67001					23	3972.35	99.98	1.11111	0.00463	1.10648
24	3929.67	98.91	0.81911	0.00403	0.81508					24	3973	100	1.11111	0.00357	1.10754
25	3933.07	98.99	0.6173	0.00491	0.61239					25	3971.46	99.96	1.11111	0.00402	1.10709
26	3923.64	98.76	0.71994	0.00524	0.7147					26	3972.67	99.99	1.11111	0.00459	1.10652
27	3967.02	99.85	0.79617	0.00466	0.79151					27	3973.01	100	1.11111	0.00521	1.1059
28	3899.08	98.14	0.6863	0.00463	0.68167					28	3973	100	1.11111	0.00388	1.10723
29	3929.59	98.91	0.7268	0.00504	0.72176					29	3972.35	99.98	1.11111	0.00453	1.10658
30	3932.49	98.98	0.70495	0.00332	0.70163					30	3972.5	99.99	1.11111	0.00453	1.10658
31	3947.88	99.37	0.65574	0.00502	0.65072					31	3970.41	99.93	1.11111	0.00545	1.10566
32	3933.2	99	0.68699	0.00409	0.6829					32	3972.67	99.99	1.11111	0.00457	1.10654
33	3931.63	98.96	0.67393	0.00385	0.67008					33	3973.01	100	1.11111	0.00476	1.10635
34	3973	100	1.06872	0.00514	1.06358					34	3959.75	99.67	1.11111	0.00521	1.1059
35	3972.35	99.98	1.00259	0.00545	0.99714					35	3972.5	99.99	1.11111	0.00525	1.10586
36	3973.01	100	0.98248	0.00452	0.97796					36	3972.03	99.98	1.11111	0.00486	1.10625
37	3709.35	93.36	0.69464	0.00494	0.6897					37	3972.35	99.98	1.11111	0.00442	1.10669
38	3877.41	97.59	0.64551	0.00538	0.64013					38	3972.67	99.99	1.11111	0.00477	1.10634
39	3958.13	99.63	0.85593	0.00469	0.85124					39	3972.67	99.99	1.11111	0.00454	1.10657
40	3882.68	97.73	0.69656	0.0041	0.69246					40	3972.67	99.99	1.11111	0.0041	1.10701
41	3857.71	97.1	0.68399	0.00404	0.67995					41	3962.67	99.74	1.11111	0.00427	1.10684
42	3939.93	99.17	0.74438	0.00426	0.74012					42	3968.88	99.9	1.11111	0.00474	1.10637
43	3949.75	99.41	0.7129	0.00536	0.70754					43	3970.09	99.93	1.11111	0.00377	1.10734
44	3931.66	98.96	0.61106	0.0051	0.60596					44	3971.98	99.97	1.11111	0.00454	1.10657
45	3942	99.22	0.6432	0.00484	0.63836					45	3972.67	99.99	1.11111	0.00522	1.10589
46	3924.11	98.77	0.66941	0.00509	0.66432					46	3973.01	100	1.11111	0.00497	1.10614
47	3876.85	97.58	0.63082	0.00404	0.62678					47	3972.67	99.99	1.11111	0.00561	1.1055
48	3955.22	99.55	0.91881	0.0051	0.91371					48	3971.06	99.95	1.11111	0.00466	1.10645
49	3917.75	98.61	0.71142	0.00458	0.70684					49	3972.35	99.98	1.11111	0.00492	1.10619
50	3970.73	99.94	1.08846	0.00439	1.08407					50	3972.35	99.98	1.11111	0.00424	1.10687
51	3956.19	99.58	0.82091	0.00457	0.81634					51	3967.18	99.85	1.11111	0.00446	1.10665
52	3857.14	97.08	0.76813	0.00523	0.7629					52	3972.67	99.99	1.11111	0.00547	1.10564
53	3945.1	99.3	0.87324	0.00487	0.86837					53	3970.73	99.94	1.11111	0.00457	1.10654
54	3814.97	96.02	0.65846	0.00399	0.65447					54	3970.73	99.94	1.11111	0.00487	1.10624
55	3884.71	97.78	0.68918	0.00458	0.6846					55	3971.98	99.97	1.11111	0.00415	1.10696
56	3940.44	99.18	0.72145	0.00422	0.71723					56	3968.8	99.89	1.11111	0.00562	1.10549
57	3905.27	98.3	0.68237	0.0046	0.67777					57	3972.35	99.98	1.11111	0.00413	1.10698
58	3972.5	99.99	1.06913	0.00493	1.0642					58	3972.03	99.98	1.11111	0.00516	1.10595
59	3972.67	99.99	1.00464	0.0045	1.00014					59	3973.01	100	1.11111	0.00395	1.10716
60	3952.64	99.49	0.70519	0.00481	0.70038					60	3973.01	100	1.11111	0.00553	1.10558
61	3881.51	97.7	0.64355	0.00473	0.63882					61	3971.98	99.97	1.11111	0.00484	1.10627
62	3929.67	98.91	0.68055	0.00525	0.6753					62	3969.44	99.91	1.11111	0.00452	1.10659
63	3806.03	95.8	0.80586	0.00585	0.80001					63	3972.67	99.99	1.11111	0.00408	1.10703
64	3960.39	99.68	0.74385	0.00491	0.73894					64	3973	100	1.11111	0.00463	1.10648
65	3800.55	95.66	0.58747	0.00412	0.58335					65	3972.67	99.99	1.11111	0.00428	1.10683
66	3929.69	98.91	0.6759	0.00496	0.67094					66	3968.88	99.9	1.11111	0.00497	1.10614
67	3912.68	98.48	0.8352	0.00531	0.82989					67	3963.71	99.77	1.11111	0.0046	1.10651
68	3971.06	99.95	1.10671	0.00456	1.10215					68	3959.75	99.67	1.11111	0.00449	1.10662
69	3936.76	99.09	0.63593	0.00499	0.63094					69	3972.5	99.99	1.11111	0.00412	1.10699
70	3917.7	98.61	0.6319	0.00487	0.62703					70	3972.67	99.99	1.11111	0.00388	1.10723
71	3756.35	94.55	0.68116	0.00498	0.67618					71	3971.46	99.96	1.11111	0.00455	1.10656
72	3949.5	99.41	0.69446	0.00498	0.68948					72	3966.86	99.85	1.11111	0.0044	1.10671
73	3951.34	99.45	0.7599	0.00383	0.75607					73	3972.35	99.98	1.11111	0.00516	1.10595
74	3889.91	97.91	0.73914	0.00474	0.7344					74	3972.67	99.99	1.11111	0.0054	1.10571
75	3881.91	97.71	0.66391	0.00497	0.65894					75	3970.73	99.94	1.11111	0.00524	1.10587
76	3866	97.31	0.82544	0.00482	0.82062					76	3969.12	99.9	1.11111	0.00395	1.10716
77	3971.38	99.96	0.95205	0.00418	0.94787					77	3972.03	99.98	1.11111	0.00441	1.1067
78	3970.73	99.94	1.0866	0.00527	1.08133					78	3970.09	99.93	1.11111	0.0045	1.10661
79	3969.58	99.91	0.77455	0.00454	0.77001					79	3962.67	99.74	1.11111	0.0048	1.10631
80	3962.16	99.73	0.71069	0.00464	0.70605					80	3967.84	99.87	1.11111	0.00466	1.10645
81	3968.36	99.88	1.0797	0.00517	1.07453					81	3972.03	99.98	1.11111	0.00443	1.10668
82	3833.08	96.48	0.6926	0.0051	0.6875					82	3969.12	99.9	1.11111	0.00439	1.10672
83	3820.5	96.16	0.66994	0.00528	0.66466					83	3973.01	100	1.11111	0.00447	1.10664
84	3968.88	99.9	0.89782	0.00566	0.89216					84	3973	100	1.11111	0.00389	1.10722
85	3879.64	97.65	0.65302	0.00489	0.64813					85	3972.35	99.98	1.11111	0.00489	1.10622
86	3972.67	99.99	1.10916	0.00411	1.10505					86	3972.35	99.98	1.11111	0.00429	1.10682
87	3916.66	98.58	0.71433	0.0046	0.70973					87	3973	100	1.11111	0.00411	1.107
88	3972.67	99.99	0.98006	0.00551	0.97455					88	3967.5	99.86	1.11111	0.00508	1.10603
89	3900.24	98.17	0.69434	0.00479	0.68955					89	3972.67	99.99	1.11111	0.00392	1.10719
90	3857.24	97.09	0.83001	0.00409	0.82592					90	3973	100	1.11111	0.00441	1.1067
91	3921.91	98.71	0.65612	0.00482	0.6513					91	3972.35	99.98	1.11111	0.00534	1.10577
92	3949.73	99.41	0.6583	0.0045	0.6538					92	3969.39	99.91	1.11111	0.0042	1.10691
93	3968.88	99.9	1.03642	0.00436	1.03206					93	3969.44	99.91	1.11111	0.00412	1.10699
94	3934.89	99.04	0.75746	0.00371	0.75375					94	3970.73	99.94	1.11111	0.00431	1.1068
95	3960.56	99.69	0.73309	0.00475	0.72834					95	3972.35	99.98	1.11111	0.00453	1.10658
96	3909.94	98.41	0.68178	0.00455	0.67723					96	3972.67	99.99	1.11111	0.00454	1.10657
97	3972.67	99.99	0.62412	0.00473	0.61939					97	3971.98	99.97	1.11111	0.00435	1.10676
98	3824.64	96.27	0.69641	0.00468	0.69173					98	3970.41	99.93	1.11111	0.00461	1.1065
99	3846.65	96.82	0.67521	0.00422	0.67099					99	3972.67	99.99	1.11111	0.00486	1.10625
100	3965.7	99.82	0.87236	0.00404	0.86832					100	3971.98	99.97	1.11111	0.0042	1.10691
101	3837.05	96.58	0.65752	0.00501	0.65251					101	3970.41	99.93	1.11111	0.00486	1.10625
102	3945.46	99.31	0.81285	0.00471	0.80814					102	3973.01	100	1.11111	0.00504	1.10607
103	3879.27	97.64	0.64938	0.00499	0.64439					103	3970.73	99.94	1.11111	0.00425	1.10686
104	3933.02	98.99	0.75292	0.00502	0.7479					104	3971.98	99.97	1.11111	0.00506	1.10605
105	3967.84	99.87	0.92624	0.00491	0.92133					105	3973	100	1.11111	0.00524	1.10587
106	3935.53	99.06	0.66978	0.00479	0.66499					106	3972.67	99.99	1.11111	0.00453	1.10658
107	3899.6	98.15	0.66861	0.00453	0.66408					107	3973	100	1.11111	0.00414	1.10697
108	3901.06	98.19	0.66306	0.00486	0.6582					108	3967.5	99.86	1.11111	0.00517	1.10594
109	3867.17	97.34	0.61238	0.00528	0.6071					109	3968.8	99.89	1.11111	0.00402	1.10709
110	3869.61	97.4	0.67507	0.00499	0.67008					110	3972.67	99.99	1.11111	0.00395	1.10716
111	3897.39	98.1	0.64947	0.00469	0.64478					111	3972.67	99.99	1.11111	0.00394	1.10717
112	3859.79	97.15	0.70676	0.00509	0.70167					112	3973	100	1.11111	0.00517	1.10594
113	3865.5	97.29	0.71182	0.00527	0.70655					113	3971.06	99.95	1.11111	0.00491	1.1062
114	3863.56	97.25	0.74821	0.00509	0.74312					114	3973.01	100	1.11111	0.00435	1.10676
115	3852.04	96.96	0.70094	0.00415	0.69679					115	3972.67	99.99	1.11111	0.00516	1.10595
116	3925.97	98.82	0.83606	0.00483	0.83123					116	3972.35	99.98	1.11111	0.00457	1.10654
117	3918.12	98.62	0.72483	0.00492	0.71991					117	3972.67	99.99	1.11111	0.00412	1.10699
118	3973	100	0.98084	0.00467	0.97617					118	3972.35	99.98	1.11111	0.00442	1.10669
119	3865.52	97.29	0.64513	0.00442	0.64071					119	3970.09	99.93	1.11111	0.00391	1.1072
120	3959.89	99.67	0.68119	0.00501	0.67618					120	3973.01	100	1.11111	0.00471	1.1064
121	3835.78	96.55	0.66961	0.00403	0.66558					121	3972.03	99.98	1.11111	0.00406	1.10705
122	3864.96	97.28	0.68795	0.00531	0.68264					122	3970.41	99.93	1.11111	0.00462	1.10649
123	3964.22	99.78	0.73839	0.00495	0.73344					123	3972.67	99.99	1.11111	0.00506	1.10605
124	3972.5	99.99	0.99962	0.00419	0.99543					124	3972.35	99.98	1.11111	0.00443	1.10668
125	3958.13	99.63	0.779	0.00531	0.77369					125	3968.88	99.9	1.11111	0.00504	1.10607
126	3737.26	94.07	0.69317	0.00516	0.68801					126	3972.67	99.99	1.11111	0.00457	1.10654
127	3904.6	98.28	0.84591	0.00462	0.84129					127	3972.5	99.99	1.11111	0.0044	1.10671
128	3871.52	97.45	0.64958	0.00475	0.64483					128	3970.41	99.93	1.11111	0.00512	1.10599
129	3939.41	99.15	0.69212	0.00498	0.68714					129	3972.35	99.98	1.11111	0.00483	1.10628
130	3913.56	98.5	0.64486	0.00448	0.64038					130	3971.06	99.95	1.11111	0.00397	1.10714
131	3865.48	97.29	0.64361	0.00552	0.63809					131	3968.88	99.9	1.11111	0.00468	1.10643
132	3962.47	99.73	0.7795	0.00515	0.77435					132	3972.5	99.99	1.11111	0.00407	1.10704
133	3884.7	97.78	0.62494	0.00526	0.61968					133	3970.73	99.94	1.11111	0.0051	1.10601
134	3895.58	98.05	0.70714	0.00516	0.70198					134	3972.35	99.98	1.11111	0.0038	1.10731
135	3972.5	99.99	1.04329	0.00508	1.03821					135	3972.35	99.98	1.11111	0.00503	1.10608
136	3955.55	99.56	0.76369	0.00472	0.75897					136	3969.12	99.9	1.11111	0.00447	1.10664
137	3946.13	99.32	0.72569	0.00456	0.72113					137	3973.01	100	1.11111	0.00406	1.10705
138	3970.09	99.93	1.0752	0.00374	1.07146					138	3970.09	99.93	1.11111	0.00433	1.10678
139	3973	100	0.89268	0.00578	0.8869					139	3973	100	1.11111	0.00434	1.10677
140	3909.77	98.41	0.72751	0.00458	0.72293					140	3972.5	99.99	1.11111	0.0046	1.10651
141	3921.11	98.69	0.75703	0.00476	0.75227					141	3971.98	99.97	1.11111	0.00514	1.10597
142	3747.14	94.31	0.66335	0.00553	0.65782					142	3972.5	99.99	1.11111	0.00394	1.10717
143	3948.58	99.39	0.71637	0.00441	0.71196					143	3972.03	99.98	1.11111	0.00369	1.10742
144	3812.05	95.95	0.67011	0.00587	0.66424					144	3971.06	99.95	1.11111	0.0051	1.10601
145	3814.97	96.02	0.64777	0.00481	0.64296					145	3972.03	99.98	1.11111	0.00414	1.10697
146	3776.62	95.06	0.71448	0.00487	0.70961					146	3967.84	99.87	1.11111	0.00506	1.10605
147	3868.06	97.36	0.72173	0.00466	0.71707					147	3972.67	99.99	1.11111	0.00569	1.10542
148	3971.06	99.95	1.0805	0.00486	1.07564					148	3968.88	99.9	1.11111	0.00443	1.10668
149	3884.09	97.76	0.68088	0.00409	0.67679					149	3972.35	99.98	1.11111	0.00532	1.10579
150	3921.47	98.7	0.63583	0.00514	0.63069					150	3971.98	99.97	1.11111	0.00444	1.10667
151	3824.64	96.27	0.71256	0.00506	0.7075					151	3972.35	99.98	1.11111	0.00528	1.10583
152	3936.82	99.09	0.71904	0.0046	0.71444					152	3970.09	99.93	1.11111	0.00509	1.10602
153	3867.4	97.34	0.65502	0.00503	0.64999					153	3973.01	100	1.11111	0.00555	1.10556
154	3933.36	99	0.7539	0.00482	0.74908					154	3962.67	99.74	1.11111	0.00475	1.10636
155	3822.57	96.21	0.68518	0.00494	0.68024					155	3972.67	99.99	1.11111	0.00415	1.10696
156	3945.64	99.31	0.76305	0.00519	0.75786					156	3973	100	1.11111	0.00479	1.10632
157	3943.06	99.25	0.68446	0.00463	0.67983					157	3971.46	99.96	1.11111	0.00434	1.10677
158	3812.82	95.97	0.61339	0.00494	0.60845					158	3972.5	99.99	1.11111	0.00452	1.10659
159	3970.95	99.95	1.11052	0.00492	1.1056					159	3972.67	99.99	1.11111	0.00433	1.10678
160	3724.74	93.75	0.74398	0.00443	0.73955					160	3973	100	1.11111	0.00348	1.10763
161	3952.33	99.48	0.68831	0.00468	0.68363					161	3970.73	99.94	1.11111	0.00445	1.10666
162	3970.41	99.93	1.09477	0.00471	1.09006					162	3972.35	99.98	1.11111	0.00507	1.10604
163	3813.02	95.97	0.69853	0.00485	0.69368					163	3972.67	99.99	1.11111	0.00468	1.10643
164	3972.35	99.98	0.99339	0.0046	0.98879					164	3969.12	99.9	1.11111	0.00475	1.10636
165	3962.03	99.72	0.83747	0.00485	0.83262					165	3972.67	99.99	1.11111	0.00415	1.10696
166	3955.55	99.56	0.7353	0.00453	0.73077					166	3972.35	99.98	1.11111	0.00461	1.1065
167	3931.65	98.96	0.68442	0.0043	0.68012					167	3972.5	99.99	1.11111	0.00456	1.10655
168	3872.14	97.46	0.6922	0.00462	0.68758					168	3970.73	99.94	1.11111	0.00491	1.1062
169	3931.65	98.96	0.59927	0.00394	0.59533					169	3972.67	99.99	1.11111	0.00525	1.10586
170	3849.66	96.9	0.68628	0.00537	0.68091					170	3972.35	99.98	1.11111	0.00474	1.10637
171	3881.54	97.7	0.84064	0.00472	0.83592					171	3972.35	99.98	1.11111	0.00369	1.10742
172	3765.99	94.79	0.67053	0.00521	0.66532					172	3972.67	99.99	1.11111	0.00539	1.10572
173	3906.39	98.32	0.71357	0.00482	0.70875					173	3973	100	1.11111	0.00549	1.10562
174	3859.35	97.14	0.66471	0.00475	0.65996					174	3973.01	100	1.11111	0.00494	1.10617
175	3972.35	99.98	1.1082	0.00467	1.10353					175	3972.67	99.99	1.11111	0.00433	1.10678
176	3862.38	97.22	0.59755	0.00419	0.59336					176	3970.43	99.94	1.11111	0.00495	1.10616
177	3823.49	96.24	0.70281	0.00452	0.69829					177	3972.03	99.98	1.11111	0.00491	1.1062
178	3931.15	98.95	0.71905	0.00501	0.71404					178	3964.74	99.79	1.11111	0.00446	1.10665
179	3869.29	97.39	0.70995	0.00506	0.70489					179	3972.35	99.98	1.11111	0.00419	1.10692
180	3633.1	91.44	0.67995	0.00483	0.67512					180	3973.01	100	1.11111	0.00442	1.10669
181	3970.73	99.94	1.04838	0.00473	1.04365					181	3973.01	100	1.11111	0.005	1.10611
182	3934.47	99.03	0.78035	0.00487	0.77548					182	3972.5	99.99	1.11111	0.00525	1.10586
183	3875.49	97.55	0.70109	0.00451	0.69658					183	3969.12	99.9	1.11111	0.00505	1.10606
184	3937.47	99.11	0.77416	0.00466	0.7695					184	3972.67	99.99	1.11111	0.00447	1.10664
185	3972.67	99.99	1.06863	0.00348	1.06515					185	3972.67	99.99	1.11111	0.00495	1.10616
186	3946.13	99.32	0.58167	0.00497	0.5767					186	3971.98	99.97	1.11111	0.00504	1.10607
187	3947.26	99.35	0.80074	0.00509	0.79565					187	3971.06	99.95	1.11111	0.00481	1.1063
188	3973.01	100	1.05472	0.00462	1.0501					188	3972.35	99.98	1.11111	0.00484	1.10627
189	3792.26	95.45	0.70823	0.00474	0.70349					189	3972.35	99.98	1.11111	0.00407	1.10704
190	3907.99	98.36	0.74855	0.00562	0.74293					190	3973.01	100	1.11111	0.0037	1.10741
191	3927	98.84	0.77717	0.00529	0.77188					191	3973	100	1.11111	0.00479	1.10632
192	3972.35	99.98	1.07523	0.00435	1.07088					192	3971.06	99.95	1.11111	0.00425	1.10686
193	3890.71	97.93	0.69193	0.00464	0.68729					193	3972.35	99.98	1.11111	0.00508	1.10603
194	3939.93	99.17	0.66216	0.0057	0.65646					194	3972.5	99.99	1.11111	0.00385	1.10726
195	3770.75	94.91	0.65215	0.00542	0.64673					195	3972.67	99.99	1.11111	0.00481	1.1063
196	3972.35	99.98	1.02048	0.00526	1.01522					196	3972.35	99.98	1.11111	0.00535	1.10576
197	3972.67	99.99	1.11111	0.00451	1.1066					197	3972.67	99.99	1.11111	0.00463	1.10648
198	3811.69	95.94	0.66077	0.00519	0.65558					198	3972.67	99.99	1.11111	0.00435	1.10676
199	3965.56	99.81	1.10671	0.0044	1.10231					199	3972.67	99.99	1.11111	0.00373	1.10738
200	3967.5	99.86	1.10949	0.00503	1.10446					200	3972.67	99.99	1.11111	0.00461	1.1065

## Sheet: 07_MMACO_Seeds(167)
Fast Converegnce Exp							Fast Converegnce Exp			Slow Converegnce Exp							Slow Converegnce Exp
1	3937.34	99.1	3.13838	0.01962	3.11876		Global Optimal Solution =	3973.01		#	CBLF	Quality	Taumax	Taumin	DeltaTauminmax		Global Optimal Solution =	3973.01
1	3877.14	97.59	0.6787	0.00538	0.67332		Minimum Optimal Solution =	3646.21		1	3971.46	99.96	1.11111	0.00538	1.10573		Minimum Optimal Solution =	3958.13
2	3844.07	96.75	0.71147	0.00427	0.7072		Mean of Optimal Solution =	3907.91		2	3973	100	1.11111	0.00445	1.10666		Mean of Optimal Solution =	3971.44
3	3716.33	93.54	0.76193	0.00425	0.75768		Median of Optimal Solution=	3907.91		3	3972.35	99.98	1.11111	0.00486	1.10625		Median of Optimal Solution =	3971.44
4	3968.47	99.89	0.88814	0.00529	0.88285		Solution Standrad Deviation =	63.1583		4	3972.5	99.99	1.11111	0.00548	1.10563		Solution Standrad Deviation =	2.2012
5	3907.36	98.35	0.70873	0.0046	0.70413		Average Price =	24.195		5	3971.98	99.97	1.11111	0.00496	1.10615		Average Price =	101.45
6	3945.1	99.3	0.62589	0.00418	0.62171		Relability =	12.5		6	3965.56	99.81	1.11111	0.00455	1.10656		Relability =	88.5
7	3883.48	97.75	0.64615	0.00528	0.64087		Normalized Price =	193.56		7	3972.67	99.99	1.11111	0.00506	1.10605		Normalized Price =	114.633
8	3923.9	98.76	0.71597	0.00505	0.71092		Average Solution Quality =	98.3615		8	3971.46	99.96	1.11111	0.00448	1.10663		Average Solution Quality =	99.9604
9	3971.46	99.96	0.85983	0.0047	0.85513		Average FDC =	-278.606		9	3973.01	100	1.11111	0.00528	1.10583		Average FDC =	-158.347
10	3937.34	99.1	0.69529	0.00482	0.69047		Correlation Coefficent =	-1		10	3972.67	99.99	1.11111	0.0043	1.10681		Correlation Coefficent =	-0.81784
11	3940.44	99.18	0.83759	0.00423	0.83336		Solution Robustness =	61.8749		11	3970.73	99.94	1.11111	0.00503	1.10608		Solution Robustness =	1804.25
12	3918.21	98.62	0.63479	0.00474	0.63005		Performance Rate =	0.0051664		12	3972.5	99.99	1.11111	0.00459	1.10652		Performance Rate =	0.0087235
13	3846.87	96.83	0.6433	0.00546	0.63784		Average Elapsed Time =	1.1332		13	3972.67	99.99	1.11111	0.00414	1.10697		Average Elapsed Time =	4.6787
14	3949.22	99.4	0.68598	0.00484	0.68114					14	3971.06	99.95	1.11111	0.00491	1.1062
15	3917.5	98.6	0.69396	0.00494	0.68902					15	3973	100	1.11111	0.00472	1.10639
16	3931.65	98.96	0.72917	0.00503	0.72414					16	3968.36	99.88	1.11111	0.00457	1.10654
17	3958.45	99.63	0.61562	0.00509	0.61053					17	3971.06	99.95	1.11111	0.00538	1.10573
18	3968.8	99.89	0.82043	0.00506	0.81537					18	3967.84	99.87	1.11111	0.00466	1.10645
19	3963.71	99.77	1.07295	0.00496	1.06799					19	3973	100	1.11111	0.00533	1.10578
20	3893.59	98	0.70179	0.00582	0.69597					20	3967.18	99.85	1.11111	0.00536	1.10575
21	3937.45	99.1	0.87206	0.00505	0.86701					21	3972.35	99.98	1.11111	0.00446	1.10665
22	3905.29	98.3	0.67173	0.00445	0.66728					22	3972.67	99.99	1.11111	0.00428	1.10683
23	3972.67	99.99	0.99603	0.00502	0.99101					23	3971.46	99.96	1.11111	0.00409	1.10702
24	3958.54	99.64	0.77167	0.00501	0.76666					24	3972.35	99.98	1.11111	0.00486	1.10625
25	3936.31	99.08	0.73372	0.0049	0.72882					25	3972.35	99.98	1.11111	0.00488	1.10623
26	3809.7	95.89	0.69139	0.0046	0.68679					26	3958.13	99.63	1.11111	0.00478	1.10633
27	3884.09	97.76	0.64248	0.00519	0.63729					27	3972.67	99.99	1.11111	0.00497	1.10614
28	3820.61	96.16	0.73353	0.00491	0.72862					28	3970.41	99.93	1.11111	0.00485	1.10626
29	3878.56	97.62	0.65353	0.00468	0.64885					29	3972.35	99.98	1.11111	0.00498	1.10613
30	3929.07	98.89	0.72358	0.00555	0.71803					30	3968.8	99.89	1.11111	0.00474	1.10637
31	3875.43	97.54	0.65816	0.00448	0.65368					31	3970.09	99.93	1.11111	0.00441	1.1067
32	3952.75	99.49	0.689	0.00441	0.68459					32	3972.67	99.99	1.11111	0.00418	1.10693
33	3970.95	99.95	1.06191	0.00473	1.05718					33	3972.67	99.99	1.11111	0.004	1.10711
34	3938.89	99.14	0.84063	0.00522	0.83541					34	3972.35	99.98	1.11111	0.00437	1.10674
35	3926.25	98.82	0.67763	0.00507	0.67256					35	3972.03	99.98	1.11111	0.00531	1.1058
36	3888.33	97.87	0.66453	0.00501	0.65952					36	3973	100	1.11111	0.00463	1.10648
37	3883.18	97.74	0.67309	0.00468	0.66841					37	3973	100	1.11111	0.00534	1.10577
38	3921.31	98.7	0.67125	0.00512	0.66613					38	3970.41	99.93	1.11111	0.00403	1.10708
39	3967.33	99.86	0.86659	0.00513	0.86146					39	3971.98	99.97	1.11111	0.00492	1.10619
40	3908.36	98.37	0.88956	0.00468	0.88488					40	3971.06	99.95	1.11111	0.00492	1.10619
41	3945.61	99.31	0.60287	0.0049	0.59797					41	3970.41	99.93	1.11111	0.00493	1.10618
42	3967.99	99.87	0.75644	0.00483	0.75161					42	3972.67	99.99	1.11111	0.00496	1.10615
43	3893.77	98.01	0.75584	0.00477	0.75107					43	3971.46	99.96	1.11111	0.0051	1.10601
44	3952.33	99.48	0.90923	0.00488	0.90435					44	3969.12	99.9	1.11111	0.00455	1.10656
45	3772.26	94.95	0.69144	0.00396	0.68748					45	3973	100	1.11111	0.00508	1.10603
46	3933.99	99.02	0.69959	0.00463	0.69496					46	3971.46	99.96	1.11111	0.00437	1.10674
47	3742.91	94.21	0.72958	0.00475	0.72483					47	3966.53	99.84	1.11111	0.00464	1.10647
48	3792.58	95.46	0.6818	0.00556	0.67624					48	3972.35	99.98	1.11111	0.00511	1.106
49	3912.4	98.47	0.67563	0.00488	0.67075					49	3969.12	99.9	1.11111	0.00416	1.10695
50	3966.53	99.84	0.93264	0.00519	0.92745					50	3972.67	99.99	1.11111	0.00517	1.10594
51	3928.03	98.87	0.63049	0.00448	0.62601					51	3972.35	99.98	1.11111	0.00484	1.10627
52	3968.36	99.88	0.6639	0.00459	0.65931					52	3972.35	99.98	1.11111	0.0049	1.10621
53	3922.24	98.72	0.78766	0.00414	0.78352					53	3972.67	99.99	1.11111	0.00484	1.10627
54	3923.4	98.75	0.80797	0.00441	0.80356					54	3972.35	99.98	1.11111	0.00496	1.10615
55	3890.54	97.92	0.6939	0.00458	0.68932					55	3971.06	99.95	1.11111	0.00402	1.10709
56	3968.36	99.88	1.0768	0.00433	1.07247					56	3972.35	99.98	1.11111	0.00495	1.10616
57	3949.23	99.4	0.61957	0.00475	0.61482					57	3969.39	99.91	1.11111	0.00503	1.10608
58	3961.39	99.71	0.71642	0.00442	0.712					58	3973	100	1.11111	0.00484	1.10627
59	3869.34	97.39	0.64868	0.00391	0.64477					59	3965.24	99.8	1.11111	0.00445	1.10666
60	3968.88	99.9	1.09895	0.00383	1.09512					60	3972.67	99.99	1.11111	0.00466	1.10645
61	3646.2	91.77	0.64313	0.00445	0.63868					61	3966.53	99.84	1.11111	0.00407	1.10704
62	3972.67	99.99	1.00754	0.00385	1.00369					62	3970.73	99.94	1.11111	0.00407	1.10704
63	3897.3	98.09	0.75059	0.0056	0.74499					63	3972.35	99.98	1.11111	0.00508	1.10603
64	3973.01	100	1.06325	0.00341	1.05984					64	3972.67	99.99	1.11111	0.0056	1.10551
65	3921.83	98.71	0.68859	0.00406	0.68453					65	3971.98	99.97	1.11111	0.00404	1.10707
66	3969.39	99.91	0.73574	0.00496	0.73078					66	3971.98	99.97	1.11111	0.00415	1.10696
67	3726.91	93.81	0.68858	0.0047	0.68388					67	3971.98	99.97	1.11111	0.00539	1.10572
68	3963.71	99.77	1.05259	0.00519	1.0474					68	3972.5	99.99	1.11111	0.00467	1.10644
69	3939.39	99.15	0.63319	0.00466	0.62853					69	3973	100	1.11111	0.00436	1.10675
70	3930.99	98.94	0.83365	0.00484	0.82881					70	3970.41	99.93	1.11111	0.00448	1.10663
71	3837.87	96.6	0.63951	0.00464	0.63487					71	3973.01	100	1.11111	0.00481	1.1063
72	3887.84	97.86	0.73303	0.00469	0.72834					72	3971.46	99.96	1.11111	0.00413	1.10698
73	3965.78	99.82	0.6311	0.00394	0.62716					73	3970.73	99.94	1.11111	0.00528	1.10583
74	3971.98	99.97	1.09639	0.00498	1.09141					74	3971.98	99.97	1.11111	0.00427	1.10684
75	3967.18	99.85	1.08115	0.00404	1.07711					75	3970.73	99.94	1.11111	0.00397	1.10714
76	3834.98	96.53	0.65173	0.00483	0.6469					76	3972.35	99.98	1.11111	0.00493	1.10618
77	3926.14	98.82	0.7251	0.00452	0.72058					77	3972.35	99.98	1.11111	0.0048	1.10631
78	3772.12	94.94	0.72314	0.0057	0.71744					78	3970.73	99.94	1.11111	0.00403	1.10708
79	3932.81	98.99	0.73478	0.00485	0.72993					79	3972.67	99.99	1.11111	0.00494	1.10617
80	3900.67	98.18	0.70075	0.00541	0.69534					80	3972.35	99.98	1.11111	0.0042	1.10691
81	3753.29	94.47	0.73224	0.0054	0.72684					81	3972.67	99.99	1.11111	0.00505	1.10606
82	3935.79	99.06	0.77204	0.0047	0.76734					82	3973	100	1.11111	0.00415	1.10696
83	3792.08	95.45	0.68234	0.00419	0.67815					83	3972.5	99.99	1.11111	0.00496	1.10615
84	3966.21	99.83	0.67005	0.00537	0.66468					84	3968.36	99.88	1.11111	0.00496	1.10615
85	3860.53	97.17	0.64757	0.00505	0.64252					85	3972.03	99.98	1.11111	0.00449	1.10662
86	3874.11	97.51	0.68908	0.00461	0.68447					86	3972.67	99.99	1.11111	0.00486	1.10625
87	3849.6	96.89	0.65758	0.00435	0.65323					87	3971.98	99.97	1.11111	0.00408	1.10703
88	3906.75	98.33	0.69158	0.00446	0.68712					88	3972.67	99.99	1.11111	0.00511	1.106
89	3823.46	96.24	0.62735	0.00524	0.62211					89	3973	100	1.11111	0.00455	1.10656
90	3949.75	99.41	0.77569	0.00476	0.77093					90	3973	100	1.11111	0.00388	1.10723
91	3814.81	96.02	0.62229	0.00535	0.61694					91	3973	100	1.11111	0.00432	1.10679
92	3971.98	99.97	1.05462	0.00496	1.04966					92	3972.67	99.99	1.11111	0.00452	1.10659
93	3971.98	99.97	1.09205	0.00399	1.08806					93	3971.98	99.97	1.11111	0.00464	1.10647
94	3818.36	96.11	0.68159	0.00503	0.67656					94	3972.67	99.99	1.11111	0.00518	1.10593
95	3878.77	97.63	0.69078	0.00456	0.68622					95	3973	100	1.11111	0.00476	1.10635
96	3837.68	96.59	0.65824	0.00499	0.65325					96	3969.39	99.91	1.11111	0.00526	1.10585
97	3888.44	97.87	0.65205	0.00522	0.64683					97	3971.46	99.96	1.11111	0.00488	1.10623
98	3968.82	99.89	0.76785	0.00422	0.76363					98	3972.5	99.99	1.11111	0.00441	1.1067
99	3850.18	96.91	0.64238	0.00492	0.63746					99	3970.73	99.94	1.11111	0.00536	1.10575
100	3915.47	98.55	0.69256	0.0046	0.68796					100	3972.67	99.99	1.11111	0.00489	1.10622
101	3769.08	94.87	0.6612	0.00541	0.65579					101	3972.03	99.98	1.11111	0.00464	1.10647
102	3950.27	99.43	0.89495	0.0047	0.89025					102	3972.67	99.99	1.11111	0.00393	1.10718
103	3972.5	99.99	1.07973	0.00482	1.07491					103	3972.35	99.98	1.11111	0.0048	1.10631
104	3948.93	99.39	0.88295	0.00496	0.87799					104	3972.35	99.98	1.11111	0.00469	1.10642
105	3956.84	99.59	0.69125	0.00488	0.68637					105	3973.01	100	1.11111	0.00524	1.10587
106	3953.89	99.52	0.81076	0.00472	0.80604					106	3971.98	99.97	1.11111	0.00467	1.10644
107	3918.57	98.63	0.70237	0.00474	0.69763					107	3971.98	99.97	1.11111	0.00456	1.10655
108	3771.9	94.94	0.65022	0.00447	0.64575					108	3971.98	99.97	1.11111	0.00429	1.10682
109	3918.12	98.62	0.6682	0.0055	0.6627					109	3971.46	99.96	1.11111	0.0044	1.10671
110	3872.51	97.47	0.72049	0.00396	0.71653					110	3973	100	1.11111	0.00465	1.10646
111	3963.09	99.75	0.84093	0.00481	0.83612					111	3972.35	99.98	1.11111	0.00502	1.10609
112	3810.79	95.92	0.68437	0.00504	0.67933					112	3972.5	99.99	1.11111	0.00478	1.10633
113	3887.19	97.84	0.74005	0.0047	0.73535					113	3972.35	99.98	1.11111	0.00412	1.10699
114	3904.11	98.27	0.66156	0.00353	0.65803					114	3967.18	99.85	1.11111	0.0046	1.10651
115	3967.84	99.87	1.00359	0.00449	0.9991					115	3970.73	99.94	1.11111	0.00529	1.10582
116	3923.55	98.76	0.63236	0.00489	0.62747					116	3972.35	99.98	1.11111	0.00548	1.10563
117	3960.83	99.69	0.72524	0.00495	0.72029					117	3972.35	99.98	1.11111	0.00525	1.10586
118	3870	97.41	0.65306	0.0045	0.64856					118	3972.67	99.99	1.11111	0.00473	1.10638
119	3955.55	99.56	0.70504	0.00535	0.69969					119	3972.35	99.98	1.11111	0.00442	1.10669
120	3954.92	99.54	0.71757	0.00516	0.71241					120	3971.98	99.97	1.11111	0.00379	1.10732
121	3911.92	98.46	0.65841	0.00493	0.65348					121	3972.35	99.98	1.11111	0.00403	1.10708
122	3813.72	95.99	0.71244	0.00517	0.70727					122	3970.95	99.95	1.11111	0.00497	1.10614
123	3953.37	99.51	0.74056	0.00472	0.73584					123	3972.35	99.98	1.11111	0.00473	1.10638
124	3968.47	99.89	0.84352	0.00486	0.83866					124	3971.46	99.96	1.11111	0.0046	1.10651
125	3906.32	98.32	0.59618	0.00401	0.59217					125	3971.46	99.96	1.11111	0.00394	1.10717
126	3813.2	95.98	0.63951	0.00443	0.63508					126	3966.29	99.83	1.11111	0.00521	1.1059
127	3947.91	99.37	0.69933	0.00541	0.69392					127	3972.35	99.98	1.11111	0.00489	1.10622
128	3897.59	98.1	0.67351	0.00389	0.66962					128	3971.46	99.96	1.11111	0.00415	1.10696
129	3927.52	98.85	0.73693	0.00478	0.73215					129	3968.88	99.9	1.11111	0.00477	1.10634
130	3947.16	99.35	0.72171	0.00441	0.7173					130	3973.01	100	1.11111	0.00447	1.10664
131	3904.76	98.28	0.63439	0.0045	0.62989					131	3973	100	1.11111	0.00489	1.10622
132	3927.52	98.85	0.6779	0.00475	0.67315					132	3972.67	99.99	1.11111	0.00464	1.10647
133	3904.9	98.29	0.66379	0.00358	0.66021					133	3972.35	99.98	1.11111	0.00449	1.10662
134	3945.61	99.31	0.75743	0.00508	0.75235					134	3970.73	99.94	1.11111	0.0051	1.10601
135	3810.64	95.91	0.72811	0.00435	0.72376					135	3972.67	99.99	1.11111	0.00505	1.10606
136	3968.8	99.89	1.04644	0.00568	1.04076					136	3973.01	100	1.11111	0.00432	1.10679
137	3967.18	99.85	1.10254	0.00464	1.0979					137	3972.67	99.99	1.11111	0.00472	1.10639
138	3950.27	99.43	0.72803	0.00426	0.72377					138	3970.43	99.94	1.11111	0.00444	1.10667
139	3926.48	98.83	0.7904	0.00478	0.78562					139	3972.35	99.98	1.11111	0.00492	1.10619
140	3899.96	98.16	0.68205	0.00524	0.67681					140	3973.01	100	1.11111	0.00539	1.10572
141	3865.22	97.29	0.6634	0.005	0.6584					141	3973	100	1.11111	0.00453	1.10658
142	3973	100	1.05126	0.00544	1.04582					142	3971.46	99.96	1.11111	0.00435	1.10676
143	3917.18	98.59	0.63793	0.00526	0.63267					143	3970.41	99.93	1.11111	0.00444	1.10667
144	3969.76	99.92	0.8719	0.00387	0.86803					144	3968.8	99.89	1.11111	0.00544	1.10567
145	3887.71	97.85	0.64445	0.00516	0.63929					145	3972.67	99.99	1.11111	0.00446	1.10665
146	3953.7	99.51	0.75149	0.00493	0.74656					146	3972.67	99.99	1.11111	0.00456	1.10655
147	3800.86	95.67	0.60416	0.00525	0.59891					147	3972.35	99.98	1.11111	0.0042	1.10691
148	3955.44	99.56	0.65385	0.00494	0.64891					148	3972.67	99.99	1.11111	0.00493	1.10618
149	3917.23	98.6	0.69571	0.00452	0.69119					149	3972.35	99.98	1.11111	0.00488	1.10623
150	3917.7	98.61	0.61933	0.00464	0.61469					150	3973.01	100	1.11111	0.00416	1.10695
151	3959.05	99.65	0.60107	0.00497	0.5961					151	3973	100	1.11111	0.00419	1.10692
152	3950.17	99.43	0.63857	0.0049	0.63367					152	3970.09	99.93	1.11111	0.00439	1.10672
153	3971.98	99.97	0.96889	0.00476	0.96413					153	3964.92	99.8	1.11111	0.00387	1.10724
154	3953.37	99.51	0.82353	0.00519	0.81834					154	3959.75	99.67	1.11111	0.00437	1.10674
155	3972.35	99.98	1.11048	0.00514	1.10534					155	3970.95	99.95	1.11111	0.00379	1.10732
156	3973	100	1.07989	0.00387	1.07602					156	3971.46	99.96	1.11111	0.00492	1.10619
157	3968.36	99.88	0.65144	0.00415	0.64729					157	3964.22	99.78	1.11111	0.00478	1.10633
158	3971.46	99.96	1.0695	0.00428	1.06522					158	3971.46	99.96	1.11111	0.0048	1.10631
159	3906.39	98.32	0.6381	0.00523	0.63287					159	3969.12	99.9	1.11111	0.00492	1.10619
160	3939.5	99.16	0.73841	0.00509	0.73332					160	3973	100	1.11111	0.00407	1.10704
161	3846.06	96.8	0.75198	0.00479	0.74719					161	3972.67	99.99	1.11111	0.00471	1.1064
162	3926.16	98.82	0.68887	0.00521	0.68366					162	3968.88	99.9	1.11111	0.00468	1.10643
163	3918.18	98.62	0.66847	0.00462	0.66385					163	3972.35	99.98	1.11111	0.00494	1.10617
164	3949.43	99.41	0.69221	0.00497	0.68724					164	3972.67	99.99	1.11111	0.00507	1.10604
165	3822.01	96.2	0.66774	0.00521	0.66253					165	3971.06	99.95	1.11111	0.00505	1.10606
166	3905.8	98.31	0.68885	0.00473	0.68412					166	3972.5	99.99	1.11111	0.00494	1.10617
167	3972.5	99.99	1.10229	0.00442	1.09787					167	3969.12	99.9	1.11111	0.0046	1.10651
168	3784.22	95.25	0.68728	0.00498	0.6823					168	3972.35	99.98	1.11111	0.00489	1.10622
169	3972.67	99.99	1.00844	0.00449	1.00395					169	3972.5	99.99	1.11111	0.00533	1.10578
170	3933.92	99.02	0.66437	0.00506	0.65931					170	3972.35	99.98	1.11111	0.00423	1.10688
171	3880.99	97.68	0.64369	0.00517	0.63852					171	3967.5	99.86	1.11111	0.00359	1.10752
172	3875.6	97.55	0.65022	0.00473	0.64549					172	3972.67	99.99	1.11111	0.00461	1.1065
173	3838.41	96.61	0.6797	0.00565	0.67405					173	3972.67	99.99	1.11111	0.00486	1.10625
174	3822.72	96.22	0.61504	0.00416	0.61088					174	3973.01	100	1.11111	0.00404	1.10707
175	3960.19	99.68	0.67121	0.00526	0.66595					175	3973	100	1.11111	0.00476	1.10635
176	3807.98	95.85	0.68022	0.00457	0.67565					176	3971.98	99.97	1.11111	0.00485	1.10626
177	3968.15	99.88	1.03893	0.00504	1.03389					177	3972.35	99.98	1.11111	0.00461	1.1065
178	3865.48	97.29	0.68157	0.0052	0.67637					178	3971.46	99.96	1.11111	0.00427	1.10684
179	3915.11	98.54	0.70803	0.00458	0.70345					179	3972.35	99.98	1.11111	0.00465	1.10646
180	3969.39	99.91	1.10228	0.00434	1.09794					180	3973	100	1.11111	0.00478	1.10633
181	3885.12	97.79	0.67102	0.00445	0.66657					181	3972.35	99.98	1.11111	0.00484	1.10627
182	3795.99	95.54	0.69875	0.00538	0.69337					182	3971.98	99.97	1.11111	0.00466	1.10645
183	3861.86	97.2	0.72256	0.00491	0.71765					183	3973	100	1.11111	0.00473	1.10638
184	3855.86	97.05	0.6906	0.00418	0.68642					184	3968.88	99.9	1.11111	0.00409	1.10702
185	3830.8	96.42	0.64813	0.00417	0.64396					185	3972.03	99.98	1.11111	0.00458	1.10653
186	3972.67	99.99	1.09588	0.00517	1.09071					186	3972.67	99.99	1.11111	0.00503	1.10608
187	3973.01	100	1.08133	0.00459	1.07674					187	3964.92	99.8	1.11111	0.00457	1.10654
188	3938.74	99.14	0.70876	0.00534	0.70342					188	3967.5	99.86	1.11111	0.00375	1.10736
189	3849.46	96.89	0.70576	0.00526	0.7005					189	3972.03	99.98	1.11111	0.00436	1.10675
190	3895.24	98.04	0.74692	0.0048	0.74212					190	3972.67	99.99	1.11111	0.00451	1.1066
191	3942	99.22	0.79631	0.00473	0.79158					191	3972.35	99.98	1.11111	0.00471	1.1064
192	3967.53	99.86	0.84696	0.00487	0.84209					192	3972.67	99.99	1.11111	0.00517	1.10594
193	3970.73	99.94	1.0687	0.00447	1.06423					193	3973	100	1.11111	0.0049	1.10621
194	3840.85	96.67	0.63979	0.00401	0.63578					194	3972.35	99.98	1.11111	0.00476	1.10635
195	3973.01	100	1.05417	0.00467	1.0495					195	3969.39	99.91	1.11111	0.00367	1.10744
196	3943.03	99.25	0.62127	0.00506	0.61621					196	3972.5	99.99	1.11111	0.00389	1.10722
197	3879.71	97.65	0.62461	0.00502	0.61959					197	3972.5	99.99	1.11111	0.00482	1.10629
198	3972.35	99.98	1.06401	0.00464	1.05937					198	3972.67	99.99	1.11111	0.0049	1.10621
199	3972.67	99.99	1.1056	0.00457	1.10103					199	3968.8	99.89	1.11111	0.00508	1.10603
200	3754.33	94.5	0.68137	0.00435						200	3973	100	1.11111	0.00446	1.10665

## Sheet: 08_MMACO_Seeds(225)
Fast Converegnce Exp							Fast Converegnce Exp			Slow Converegnce Exp							Slow Converegnce Exp
#	CBLF	Quality	Taumax	Taumin	DeltaTauminmax		Global Optimal Solution =	3973.01		#	CBLF	Quality	Taumax	Taumin	DeltaTauminmax		Global Optimal Solution =	3973.01
1	3957.51	99.61	0.776	0.00474	0.77126		Minimum Optimal Solution =	3725.37		1	3973	100	1.11111	0.00474	1.10637		Minimum Optimal Solution =	3961.36
2	3943.59	99.26	0.60978	0.00444	0.60534		Mean of Optimal Solution =	3904.08		2	3973	100	1.11111	0.00456	1.10655		Mean of Optimal Solution =	3971.65
3	3946.82	99.34	0.63946	0.00485	0.63461		Median of Optimal Solution=	3904.08		3	3971.06	99.95	1.11111	0.0035	1.10761		Median of Optimal Solution =	3971.65
4	3833.85	96.5	0.76167	0.00487	0.7568		Solution Standrad Deviation =	60.0295		4	3971.98	99.97	1.11111	0.00532	1.10579		Solution Standrad Deviation =	1.9445
5	3869.52	97.4	0.65657	0.00499	0.65158		Average Price =	23.565		5	3973	100	1.11111	0.00454	1.10657		Average Price =	100.89
6	3872.63	97.47	0.62767	0.00456	0.62311		Relability =	14		6	3971.46	99.96	1.11111	0.00409	1.10702		Relability =	89.5
7	3960.72	99.69	0.74718	0.00481	0.74237		Normalized Price =	168.321		7	3973	100	1.11111	0.00532	1.10579		Normalized Price =	112.726
8	3918.08	98.62	0.71996	0.00485	0.71511		Average Solution Quality =	98.2651		8	3971.06	99.95	1.11111	0.00421	1.1069		Average Solution Quality =	99.9657
9	3961.04	99.7	0.63522	0.00465	0.63057		Average FDC =	-289.263		9	3971.98	99.97	1.11111	0.00427	1.10684		Average FDC =	-156.062
10	3910.95	98.44	0.7912	0.00387	0.78733		Correlation Coefficent =	-1		10	3968.8	99.89	1.11111	0.00393	1.10718		Correlation Coefficent =	-0.81309
11	3845.03	96.78	0.62926	0.00409	0.62517		Solution Robustness =	65.036		11	3972.67	99.99	1.11111	0.0038	1.10731		Solution Robustness =	2042.55
12	3910.99	98.44	0.78022	0.00459	0.77563		Performance Rate =	0.005941		12	3972.35	99.98	1.11111	0.00533	1.10578		Performance Rate =	0.008871
13	3800.38	95.65	0.67888	0.00458	0.6743		Average Elapsed Time =	1.1015		13	3970.73	99.94	1.11111	0.00509	1.10602		Average Elapsed Time =	4.6451
14	3973	100	1.07208	0.00452	1.06756					14	3972.67	99.99	1.11111	0.00501	1.1061
15	3796.51	95.56	0.72763	0.00532	0.72231					15	3973.01	100	1.11111	0.00447	1.10664
16	3930.01	98.92	0.6904	0.0047	0.6857					16	3970.41	99.93	1.11111	0.00456	1.10655
17	3942.44	99.23	0.70421	0.00539	0.69882					17	3973	100	1.11111	0.00429	1.10682
18	3971.85	99.97	0.75592	0.00549	0.75043					18	3972.03	99.98	1.11111	0.00483	1.10628
19	3803.98	95.75	0.71122	0.00469	0.70653					19	3972.35	99.98	1.11111	0.00403	1.10708
20	3931.14	98.95	0.63861	0.00465	0.63396					20	3969.12	99.9	1.11111	0.00533	1.10578
21	3869.26	97.39	0.70298	0.00539	0.69759					21	3961.36	99.71	1.11111	0.00406	1.10705
22	3876.59	97.57	0.67588	0.00518	0.6707					22	3972.67	99.99	1.11111	0.00483	1.10628
23	3972.03	99.98	1.11048	0.00442	1.10606					23	3972.5	99.99	1.11111	0.00524	1.10587
24	3964.09	99.78	0.68465	0.00517	0.67948					24	3973	100	1.11111	0.00468	1.10643
25	3865.76	97.3	0.70934	0.00379	0.70555					25	3972.67	99.99	1.11111	0.00489	1.10622
26	3946.66	99.34	0.7086	0.00425	0.70435					26	3967.84	99.87	1.11111	0.00483	1.10628
27	3897.61	98.1	0.65243	0.00535	0.64708					27	3972.35	99.98	1.11111	0.00413	1.10698
28	3855.14	97.03	0.59855	0.00486	0.59369					28	3971.98	99.97	1.11111	0.00556	1.10555
29	3968.88	99.9	1.10973	0.00479	1.10494					29	3973	100	1.11111	0.00525	1.10586
30	3892.35	97.97	0.69264	0.00489	0.68775					30	3972.35	99.98	1.11111	0.00356	1.10755
31	3895.55	98.05	0.84634	0.00396	0.84238					31	3973	100	1.11111	0.00397	1.10714
32	3807.95	95.85	0.68803	0.00523	0.6828					32	3973	100	1.11111	0.00414	1.10697
33	3897.17	98.09	0.61231	0.00443	0.60788					33	3973	100	1.11111	0.00449	1.10662
34	3870.52	97.42	0.74466	0.00429	0.74037					34	3971.98	99.97	1.11111	0.0054	1.10571
35	3961.07	99.7	0.85517	0.0047	0.85047					35	3972.35	99.98	1.11111	0.00473	1.10638
36	3934.15	99.02	0.73823	0.00521	0.73302					36	3972.67	99.99	1.11111	0.00423	1.10688
37	3877.25	97.59	0.73027	0.00493	0.72534					37	3972.5	99.99	1.11111	0.00442	1.10669
38	3929.43	98.9	0.66182	0.0053	0.65652					38	3972.35	99.98	1.11111	0.00448	1.10663
39	3923.38	98.75	0.70243	0.00428	0.69815					39	3972.35	99.98	1.11111	0.00386	1.10725
40	3972.35	99.98	0.93354	0.0045	0.92904					40	3970.73	99.94	1.11111	0.00453	1.10658
41	3963.19	99.75	0.81322	0.00432	0.8089					41	3972.67	99.99	1.11111	0.0046	1.10651
42	3934.33	99.03	0.66809	0.00422	0.66387					42	3966.86	99.85	1.11111	0.00346	1.10765
43	3950.38	99.43	0.64547	0.00523	0.64024					43	3973.01	100	1.11111	0.00468	1.10643
44	3835.29	96.53	0.60814	0.00463	0.60351					44	3967.5	99.86	1.11111	0.00413	1.10698
45	3896.9	98.08	0.71396	0.00412	0.70984					45	3965.56	99.81	1.11111	0.0049	1.10621
46	3822.51	96.21	0.64932	0.00384	0.64548					46	3970.41	99.93	1.11111	0.00472	1.10639
47	3909.94	98.41	0.69512	0.0043	0.69082					47	3972.35	99.98	1.11111	0.00456	1.10655
48	3972.35	99.98	1.08035	0.00427	1.07608					48	3970.41	99.93	1.11111	0.00474	1.10637
49	3867.16	97.34	0.65077	0.00466	0.64611					49	3972.03	99.98	1.11111	0.0039	1.10721
50	3856.83	97.08	0.65292	0.00519	0.64773					50	3972.67	99.99	1.11111	0.00502	1.10609
51	3906.75	98.33	0.69444	0.00407	0.69037					51	3972.35	99.98	1.11111	0.00494	1.10617
52	3883.57	97.75	0.67565	0.00458	0.67107					52	3972.5	99.99	1.11111	0.00414	1.10697
53	3889.76	97.9	0.64752	0.00471	0.64281					53	3973.01	100	1.11111	0.00399	1.10712
54	3937.77	99.11	0.60428	0.00519	0.59909					54	3972.35	99.98	1.11111	0.00398	1.10713
55	3968.8	99.89	1.09582	0.00533	1.09049					55	3970.73	99.94	1.11111	0.00466	1.10645
56	3953.89	99.52	0.6063	0.00515	0.60115					56	3970.41	99.93	1.11111	0.00397	1.10714
57	3972.03	99.98	1.09881	0.00525	1.09356					57	3971.38	99.96	1.11111	0.00481	1.1063
58	3896.41	98.07	0.66063	0.00486	0.65577					58	3972.03	99.98	1.11111	0.0037	1.10741
59	3802.92	95.72	0.65017	0.00485	0.64532					59	3971.38	99.96	1.11111	0.00463	1.10648
60	3972.5	99.99	1.0537	0.00507	1.04863					60	3972.67	99.99	1.11111	0.00528	1.10583
61	3796.72	95.56	0.63824	0.00497	0.63327					61	3972.67	99.99	1.11111	0.00518	1.10593
62	3856.01	97.06	0.67161	0.00429	0.66732					62	3969.14	99.9	1.11111	0.00487	1.10624
63	3941.35	99.2	0.70291	0.00496	0.69795					63	3973	100	1.11111	0.0048	1.10631
64	3938.42	99.13	0.77859	0.00386	0.77473					64	3971.06	99.95	1.11111	0.00396	1.10715
65	3821.72	96.19	0.69833	0.00487	0.69346					65	3972.5	99.99	1.11111	0.00409	1.10702
66	3892.94	97.98	0.72212	0.00471	0.71741					66	3972.67	99.99	1.11111	0.00458	1.10653
67	3854.41	97.01	0.69785	0.00543	0.69242					67	3971.46	99.96	1.11111	0.00459	1.10652
68	3972.5	99.99	1.09516	0.00541	1.08975					68	3970.41	99.93	1.11111	0.00468	1.10643
69	3813.03	95.97	0.65809	0.00446	0.65363					69	3973	100	1.11111	0.00366	1.10745
70	3911.59	98.45	0.72901	0.00499	0.72402					70	3972.35	99.98	1.11111	0.0051	1.10601
71	3961.12	99.7	0.84052	0.0043	0.83622					71	3972.67	99.99	1.11111	0.00544	1.10567
72	3852.9	96.98	0.70037	0.0041	0.69627					72	3972.35	99.98	1.11111	0.00441	1.1067
73	3973	100	1.06091	0.00484	1.05607					73	3966.53	99.84	1.11111	0.00394	1.10717
74	3953.31	99.5	0.71212	0.00514	0.70698					74	3972.35	99.98	1.11111	0.00538	1.10573
75	3890.23	97.92	0.71685	0.00578	0.71107					75	3973	100	1.11111	0.00482	1.10629
76	3729.45	93.87	0.64771	0.00552	0.64219					76	3972.67	99.99	1.11111	0.00427	1.10684
77	3973.01	100	1.00687	0.00431	1.00256					77	3973	100	1.11111	0.0049	1.10621
78	3902.57	98.23	0.76607	0.00541	0.76066					78	3972.35	99.98	1.11111	0.00377	1.10734
79	3772.11	94.94	0.73246	0.00568	0.72678					79	3970.41	99.93	1.11111	0.00447	1.10664
80	3962.15	99.73	0.72605	0.00505	0.721					80	3967.5	99.86	1.11111	0.00476	1.10635
81	3967.18	99.85	0.6814	0.00408	0.67732					81	3972.35	99.98	1.11111	0.00427	1.10684
82	3925.17	98.8	0.71646	0.0044	0.71206					82	3973.01	100	1.11111	0.00523	1.10588
83	3886.91	97.83	0.73523	0.00411	0.73112					83	3973	100	1.11111	0.00508	1.10603
84	3756.89	94.56	0.69419	0.00397	0.69022					84	3972.35	99.98	1.11111	0.0054	1.10571
85	3758.52	94.6	0.71294	0.00474	0.7082					85	3973.01	100	1.11111	0.0047	1.10641
86	3823.64	96.24	0.6512	0.00537	0.64583					86	3973.01	100	1.11111	0.00495	1.10616
87	3887.66	97.85	0.71501	0.00396	0.71105					87	3972.67	99.99	1.11111	0.00497	1.10614
88	3800.26	95.65	0.7512	0.00534	0.74586					88	3972.35	99.98	1.11111	0.00421	1.1069
89	3918.21	98.62	0.74696	0.00511	0.74185					89	3973.01	100	1.11111	0.00445	1.10666
90	3945.62	99.31	0.73068	0.00555	0.72513					90	3973.01	100	1.11111	0.00341	1.1077
91	3954.6	99.54	0.84057	0.00495	0.83562					91	3973	100	1.11111	0.00441	1.1067
92	3908.04	98.36	0.76589	0.00524	0.76065					92	3972.35	99.98	1.11111	0.00465	1.10646
93	3899.13	98.14	0.76249	0.00439	0.7581					93	3973	100	1.11111	0.00402	1.10709
94	3929.37	98.9	0.71931	0.00462	0.71469					94	3973	100	1.11111	0.00475	1.10636
95	3973	100	1.01926	0.00405	1.01521					95	3972.35	99.98	1.11111	0.00431	1.1068
96	3935.12	99.05	0.66627	0.00472	0.66155					96	3973	100	1.11111	0.00468	1.10643
97	3947.58	99.36	0.79403	0.00481	0.78922					97	3972.35	99.98	1.11111	0.00537	1.10574
98	3871.36	97.44	0.70049	0.0052	0.69529					98	3971.38	99.96	1.11111	0.00492	1.10619
99	3843.77	96.75	0.65219	0.00526	0.64693					99	3970.41	99.93	1.11111	0.00515	1.10596
100	3912.4	98.47	0.69564	0.00469	0.69095					100	3972.35	99.98	1.11111	0.00532	1.10579
101	3969.44	99.91	0.67262	0.00455	0.66807					101	3969.39	99.91	1.11111	0.00543	1.10568
102	3820.22	96.15	0.61614	0.00516	0.61098					102	3973.01	100	1.11111	0.00412	1.10699
103	3971.98	99.97	1.04649	0.00501	1.04148					103	3971.38	99.96	1.11111	0.00478	1.10633
104	3840.1	96.65	0.67322	0.00443	0.66879					104	3966.53	99.84	1.11111	0.00473	1.10638
105	3929.59	98.91	0.64641	0.00511	0.6413					105	3972.67	99.99	1.11111	0.00526	1.10585
106	3725.37	93.77	0.6421	0.00421	0.63789					106	3972.67	99.99	1.11111	0.0038	1.10731
107	3927.52	98.85	0.65025	0.00456	0.64569					107	3972.67	99.99	1.11111	0.00454	1.10657
108	3929.49	98.9	0.82181	0.00383	0.81798					108	3972.35	99.98	1.11111	0.00373	1.10738
109	3856.17	97.06	0.57903	0.00479	0.57424					109	3973	100	1.11111	0.00505	1.10606
110	3967.33	99.86	0.99825	0.00483	0.99342					110	3972.67	99.99	1.11111	0.00469	1.10642
111	3876.34	97.57	0.61937	0.00465	0.61472					111	3962.67	99.74	1.11111	0.00363	1.10748
112	3887.13	97.84	0.65529	0.00469	0.6506					112	3972.67	99.99	1.11111	0.00476	1.10635
113	3967.84	99.87	0.94715	0.0045	0.94265					113	3972.67	99.99	1.11111	0.0044	1.10671
114	3938.12	99.12	0.72486	0.00483	0.72003					114	3968.88	99.9	1.11111	0.00512	1.10599
115	3838.08	96.6	0.65224	0.0048	0.64744					115	3973.01	100	1.11111	0.00468	1.10643
116	3945.3	99.3	0.73737	0.00455	0.73282					116	3972.5	99.99	1.11111	0.00438	1.10673
117	3973	100	1.08662	0.0051	1.08152					117	3972.67	99.99	1.11111	0.00497	1.10614
118	3889.04	97.89	0.63786	0.00454	0.63332					118	3973	100	1.11111	0.00527	1.10584
119	3811.75	95.94	0.63687	0.00537	0.6315					119	3971.98	99.97	1.11111	0.00382	1.10729
120	3948.72	99.39	0.59607	0.00412	0.59195					120	3972.35	99.98	1.11111	0.00449	1.10662
121	3912.53	98.48	0.72338	0.0047	0.71868					121	3972.5	99.99	1.11111	0.00523	1.10588
122	3959.57	99.66	0.80795	0.00477	0.80318					122	3970.41	99.93	1.11111	0.00481	1.1063
123	3929.84	98.91	0.70294	0.00406	0.69888					123	3973	100	1.11111	0.00485	1.10626
124	3921.31	98.7	0.66685	0.00553	0.66132					124	3972.5	99.99	1.11111	0.00455	1.10656
125	3850.3	96.91	0.64827	0.00513	0.64314					125	3972.67	99.99	1.11111	0.00493	1.10618
126	3971.98	99.97	1.10832	0.00397	1.10435					126	3972.67	99.99	1.11111	0.00525	1.10586
127	3966.86	99.85	1.10939	0.00513	1.10426					127	3972.67	99.99	1.11111	0.00455	1.10656
128	3890.3	97.92	0.719	0.00377	0.71523					128	3973	100	1.11111	0.00433	1.10678
129	3972.35	99.98	1.07137	0.00487	1.0665					129	3972.35	99.98	1.11111	0.00432	1.10679
130	3940.85	99.19	0.69265	0.00525	0.6874					130	3972.35	99.98	1.11111	0.00508	1.10603
131	3824.09	96.25	0.65777	0.00516	0.65261					131	3973	100	1.11111	0.00472	1.10639
132	3935.28	99.05	0.73658	0.00476	0.73182					132	3972.03	99.98	1.11111	0.00533	1.10578
133	3972.35	99.98	0.79878	0.00467	0.79411					133	3972.35	99.98	1.11111	0.00443	1.10668
134	3827.22	96.33	0.75653	0.00444	0.75209					134	3973.01	100	1.11111	0.00327	1.10784
135	3931.15	98.95	0.6421	0.00448	0.63762					135	3973	100	1.11111	0.00443	1.10668
136	3967.5	99.86	1.06266	0.00431	1.05835					136	3973	100	1.11111	0.00355	1.10756
137	3969.76	99.92	0.73939	0.00477	0.73462					137	3970.73	99.94	1.11111	0.00411	1.107
138	3786.34	95.3	0.63196	0.00531	0.62665					138	3970.73	99.94	1.11111	0.00447	1.10664
139	3953.4	99.51	0.8293	0.00468	0.82462					139	3971.98	99.97	1.11111	0.00475	1.10636
140	3972.35	99.98	1.04391	0.00434	1.03957					140	3970.95	99.95	1.11111	0.00536	1.10575
141	3948.37	99.38	0.65147	0.00405	0.64742					141	3973	100	1.11111	0.00463	1.10648
142	3973.01	100	0.91204	0.00525	0.90679					142	3972.67	99.99	1.11111	0.0049	1.10621
143	3788.18	95.35	0.66402	0.00519	0.65883					143	3973	100	1.11111	0.00541	1.1057
144	3867.44	97.34	0.6344	0.00462	0.62978					144	3968.36	99.88	1.11111	0.00499	1.10612
145	3957.16	99.6	0.71637	0.00379	0.71258					145	3972.35	99.98	1.11111	0.00528	1.10583
146	3966.86	99.85	0.7002	0.00476	0.69544					146	3973	100	1.11111	0.00525	1.10586
147	3812.83	95.97	0.66193	0.00521	0.65672					147	3972.35	99.98	1.11111	0.00555	1.10556
148	3930.1	98.92	0.75314	0.00456	0.74858					148	3972.35	99.98	1.11111	0.00491	1.1062
149	3966.53	99.84	0.71863	0.00468	0.71395					149	3973	100	1.11111	0.00453	1.10658
150	3938.3	99.13	0.69008	0.00422	0.68586					150	3972.35	99.98	1.11111	0.00532	1.10579
151	3971.98	99.97	1.05462	0.00467	1.04995					151	3969.39	99.91	1.11111	0.00525	1.10586
152	3801.6	95.69	0.77829	0.00417	0.77412					152	3973	100	1.11111	0.00421	1.1069
153	3867.21	97.34	0.688	0.00513	0.68287					153	3968.8	99.89	1.11111	0.00477	1.10634
154	3889.36	97.89	0.73418	0.00474	0.72944					154	3972.35	99.98	1.11111	0.00502	1.10609
155	3925.66	98.81	0.6811	0.00547	0.67563					155	3972.35	99.98	1.11111	0.00478	1.10633
156	3902.19	98.22	0.67118	0.00494	0.66624					156	3972.67	99.99	1.11111	0.00412	1.10699
157	3846.64	96.82	0.67293	0.00442	0.66851					157	3971.98	99.97	1.11111	0.00463	1.10648
158	3928.03	98.87	0.59843	0.00429	0.59414					158	3969.12	99.9	1.11111	0.00497	1.10614
159	3899.47	98.15	0.69042	0.00537	0.68505					159	3971.98	99.97	1.11111	0.00406	1.10705
160	3907.87	98.36	0.64318	0.00477	0.63841					160	3968.88	99.9	1.11111	0.00508	1.10603
161	3973	100	1.097	0.00451	1.09249					161	3969.39	99.91	1.11111	0.00529	1.10582
162	3923.9	98.76	0.65747	0.00383	0.65364					162	3971.06	99.95	1.11111	0.00482	1.10629
163	3972.67	99.99	1.07231	0.00463	1.06768					163	3971.98	99.97	1.11111	0.00463	1.10648
164	3949.23	99.4	0.70168	0.00471	0.69697					164	3971.98	99.97	1.11111	0.00447	1.10664
165	3969.91	99.92	0.68754	0.00481	0.68273					165	3972.35	99.98	1.11111	0.00433	1.10678
166	3820.84	96.17	0.69627	0.00468	0.69159					166	3972.67	99.99	1.11111	0.00428	1.10683
167	3906.39	98.32	0.74269	0.00436	0.73833					167	3972.67	99.99	1.11111	0.00418	1.10693
168	3883.88	97.76	0.68037	0.0046	0.67577					168	3972.5	99.99	1.11111	0.00461	1.1065
169	3840.15	96.66	0.73008	0.00474	0.72534					169	3973	100	1.11111	0.00381	1.1073
170	3952.96	99.5	0.64798	0.00497	0.64301					170	3968.8	99.89	1.11111	0.00497	1.10614
171	3968.47	99.89	0.8867	0.00534	0.88136					171	3969.12	99.9	1.11111	0.00342	1.10769
172	3926.44	98.83	0.72659	0.00485	0.72174					172	3965.78	99.82	1.11111	0.00472	1.10639
173	3970.73	99.94	1.04506	0.00523	1.03983					173	3972.5	99.99	1.11111	0.00478	1.10633
174	3917.18	98.59	0.69786	0.00442	0.69344					174	3973	100	1.11111	0.00455	1.10656
175	3740.64	94.15	0.68615	0.00397	0.68218					175	3969.39	99.91	1.11111	0.00454	1.10657
176	3914.35	98.52	0.69027	0.00373	0.68654					176	3971.46	99.96	1.11111	0.00524	1.10587
177	3849.87	96.9	0.69351	0.005	0.68851					177	3972.67	99.99	1.11111	0.0036	1.10751
178	3876.32	97.57	0.71514	0.0049	0.71024					178	3972.67	99.99	1.11111	0.00487	1.10624
179	3909.91	98.41	0.69317	0.00513	0.68804					179	3968.15	99.88	1.11111	0.00451	1.1066
180	3931.65	98.96	0.65292	0.00415	0.64877					180	3971.46	99.96	1.11111	0.00464	1.10647
181	3811.71	95.94	0.64603	0.00411	0.64192					181	3967.5	99.86	1.11111	0.00385	1.10726
182	3973	100	1.08662	0.00498	1.08164					182	3972.03	99.98	1.11111	0.00433	1.10678
183	3957.19	99.6	0.65752	0.00501	0.65251					183	3972.67	99.99	1.11111	0.00543	1.10568
184	3843.68	96.74	0.80884	0.00431	0.80453					184	3967.5	99.86	1.11111	0.00465	1.10646
185	3927.52	98.86	0.65411	0.00489	0.64922					185	3971.98	99.97	1.11111	0.00507	1.10604
186	3911.49	98.45	0.71853	0.00488	0.71365					186	3967.5	99.86	1.11111	0.00448	1.10663
187	3973.01	100	1.06881	0.00492	1.06389					187	3972.35	99.98	1.11111	0.00446	1.10665
188	3881.78	97.7	0.72909	0.00476	0.72433					188	3971.98	99.97	1.11111	0.00451	1.1066
189	3892.85	97.98	0.64665	0.00543	0.64122					189	3972.67	99.99	1.11111	0.00483	1.10628
190	3810.16	95.9	0.63732	0.00477	0.63255					190	3971.46	99.96	1.11111	0.00442	1.10669
191	3955.57	99.56	0.80434	0.00505	0.79929					191	3971.98	99.97	1.11111	0.00484	1.10627
192	3962.98	99.75	1.00233	0.00479	0.99754					192	3973.01	100	1.11111	0.00458	1.10653
193	3969.12	99.9	0.82335	0.00434	0.81901					193	3964.92	99.8	1.11111	0.00386	1.10725
194	3849.87	96.9	0.74113	0.004	0.73713					194	3972.67	99.99	1.11111	0.00445	1.10666
195	3788.42	95.35	0.6733	0.00426	0.66904					195	3973	100	1.11111	0.00446	1.10665
196	3959.05	99.65	0.68665	0.0048	0.68185					196	3972.35	99.98	1.11111	0.00447	1.10664
197	3866.47	97.32	0.66672	0.00417	0.66255					197	3972.35	99.98	1.11111	0.00527	1.10584
198	3837.8	96.6	0.67886	0.00455	0.67431					198	3972.67	99.99	1.11111	0.00484	1.10627
199	3933.07	98.99	0.83079	0.00457	0.82622					199	3972.35	99.98	1.11111	0.00531	1.1058
200	3892.83	97.98	0.72511	0.00472	0.72039					200	3972.35	99.98	1.11111	0.00497	1.10614

## Sheet: 09_MMACO_Seeds(11)
Fast Converegnce Exp							Fast Converegnce Exp			Slow Converegnce Exp							Slow Converegnce Exp
#	CBLF	Quality	Taumax	Taumin	DeltaTauminmax		Global Optimal Solution =	3973.01		#	CBLF	Quality	Taumax	Taumin	DeltaTauminmax		Global Optimal Solution =	3973.01
1	3826.75	96.32	0.84671	0.00453	0.84218		Minimum Optimal Solution =	3673.75		1	3968.36	99.88	1.11111	0.00406	1.10705		Minimum Optimal Solution =	3953.93
2	3881.6	97.7	0.70127	0.00357	0.6977		Mean of Optimal Solution =	3902.02		2	3970.73	99.94	1.11111	0.00423	1.10688		Mean of Optimal Solution =	3971.51
3	3969.44	99.91	1.09139	0.0052	1.08619		Median of Optimal Solution =	3902.02		3	3965.56	99.81	1.11111	0.00516	1.10595		Median of Optimal Solution =	3971.51
4	3937.72	99.11	0.7941	0.00423	0.78987		Solution Standrad Deviation =	61.2204		4	3972.35	99.98	1.11111	0.00378	1.10733		Solution Standrad Deviation =	2.2844
5	3843.25	96.73	0.68589	0.0042	0.68169		Average Price =	23.26		5	3972.35	99.98	1.11111	0.0045	1.10661		Average Price =	100.795
6	3967.18	99.85	1.09003	0.00454	1.08549		Relability =	14.5		6	3967.5	99.86	1.11111	0.00429	1.10682		Relability =	88.5
7	3958.57	99.64	0.88972	0.00481	0.88491		Normalized Price =	160.414		7	3973.01	100	1.11111	0.00523	1.10588		Normalized Price =	113.893
8	3933.2	99	0.72211	0.0043	0.71781		Average Solution Quality =	98.2131		8	3966.53	99.84	1.11111	0.00361	1.1075		Average Solution Quality =	99.9622
9	3824.77	96.27	0.68731	0.00463	0.68268		Average FDC =	-292.741		9	3971.06	99.95	1.11111	0.0047	1.10641		Average FDC =	-162.6
10	3822.72	96.22	0.61344	0.00386	0.60958		Correlation Coefficent =	-1		10	3967.18	99.85	1.11111	0.00452	1.10659		Correlation Coefficent =	-0.80891
11	3902.83	98.23	0.61685	0.00352	0.61333		Solution Robustness =	63.7372		11	3972.35	99.98	1.11111	0.00498	1.10613		Solution Robustness =	1738.55
12	3859.94	97.15	0.64183	0.00396	0.63787		Performance Rate =	0.0062339		12	3972.67	99.99	1.11111	0.00484	1.10627		Performance Rate =	0.0087802
13	3915.5	98.55	0.67965	0.00483	0.67482		Average Elapsed Time =	1.0887		13	3970.73	99.94	1.11111	0.00467	1.10644		Average Elapsed Time =	4.7068
14	3962.77	99.74	0.81316	0.00532	0.80784					14	3971.98	99.97	1.11111	0.00468	1.10643
15	3923.05	98.74	0.71484	0.0052	0.70964					15	3971.46	99.96	1.11111	0.00428	1.10683
16	3894.92	98.03	0.65662	0.0037	0.65292					16	3973	100	1.11111	0.00469	1.10642
17	3903.53	98.25	0.65037	0.00571	0.64466					17	3973.01	100	1.11111	0.00475	1.10636
18	3919.04	98.64	0.65203	0.00463	0.6474					18	3973	100	1.11111	0.00497	1.10614
19	3869.05	97.38	0.71945	0.00499	0.71446					19	3972.5	99.99	1.11111	0.00468	1.10643
20	3972.5	99.99	1.03215	0.0056	1.02655					20	3973	100	1.11111	0.00317	1.10794
21	3834.32	96.51	0.69088	0.00535	0.68553					21	3973.01	100	1.11111	0.00403	1.10708
22	3812.18	95.95	0.71859	0.00493	0.71366					22	3972.67	99.99	1.11111	0.00429	1.10682
23	3917.7	98.61	0.75026	0.00453	0.74573					23	3966.86	99.85	1.11111	0.00438	1.10673
24	3933.57	99.01	0.63694	0.00447	0.63247					24	3972.67	99.99	1.11111	0.00434	1.10677
25	3969.44	99.91	1.00937	0.00514	1.00423					25	3973.01	100	1.11111	0.0046	1.10651
26	3959.1	99.65	0.98037	0.0049	0.97547					26	3972.67	99.99	1.11111	0.00444	1.10667
27	3866	97.31	0.68148	0.00453	0.67695					27	3971.98	99.97	1.11111	0.00465	1.10646
28	3959.57	99.66	0.70618	0.00499	0.70119					28	3972.35	99.98	1.11111	0.00463	1.10648
29	3768.01	94.84	0.65811	0.00494	0.65317					29	3971.98	99.97	1.11111	0.00551	1.1056
30	3927.69	98.86	0.65524	0.0052	0.65004					30	3972.03	99.98	1.11111	0.00329	1.10782
31	3968.8	99.89	1.11048	0.00359	1.10689					31	3973	100	1.11111	0.00426	1.10685
32	3764.95	94.76	0.66633	0.0056	0.66073					32	3972.67	99.99	1.11111	0.00505	1.10606
33	3970.41	99.93	1.05381	0.00514	1.04867					33	3972.35	99.98	1.11111	0.00387	1.10724
34	3964.22	99.78	0.6498	0.00505	0.64475					34	3969.44	99.91	1.11111	0.00418	1.10693
35	3972.03	99.98	1.08752	0.00499	1.08253					35	3971.46	99.96	1.11111	0.00461	1.1065
36	3827.18	96.33	0.68313	0.0055	0.67763					36	3972.67	99.99	1.11111	0.0038	1.10731
37	3930.36	98.93	0.73392	0.00459	0.72933					37	3972.35	99.98	1.11111	0.00457	1.10654
38	3815.33	96.03	0.62622	0.00474	0.62148					38	3968.88	99.9	1.11111	0.00503	1.10608
39	3731.06	93.91	0.67976	0.0051	0.67466					39	3972.67	99.99	1.11111	0.0052	1.10591
40	3968.88	99.9	0.72275	0.0052	0.71755					40	3972.03	99.98	1.11111	0.00446	1.10665
41	3914.64	98.53	0.65342	0.00485	0.64857					41	3973.01	100	1.11111	0.00475	1.10636
42	3855.33	97.04	0.72227	0.00433	0.71794					42	3968.36	99.88	1.11111	0.00485	1.10626
43	3973	100	1.04595	0.0052	1.04075					43	3972.67	99.99	1.11111	0.00457	1.10654
44	3972.35	99.98	0.95542	0.00518	0.95024					44	3972.67	99.99	1.11111	0.00455	1.10656
45	3958.78	99.64	0.75711	0.00498	0.75213					45	3972.5	99.99	1.11111	0.00459	1.10652
46	3871.78	97.45	0.65392	0.00538	0.64854					46	3972.5	99.99	1.11111	0.00474	1.10637
47	3925.45	98.8	0.8123	0.00459	0.80771					47	3972.67	99.99	1.11111	0.00461	1.1065
48	3816.26	96.05	0.68094	0.00534	0.6756					48	3972.67	99.99	1.11111	0.00461	1.1065
49	3873.81	97.5	0.70241	0.00486	0.69755					49	3973	100	1.11111	0.0041	1.10701
50	3949.23	99.4	0.72009	0.00392	0.71617					50	3972.67	99.99	1.11111	0.00444	1.10667
51	3900.93	98.19	0.79202	0.00417	0.78785					51	3966.86	99.85	1.11111	0.00427	1.10684
52	3873.6	97.5	0.59304	0.00474	0.5883					52	3971.98	99.97	1.11111	0.00477	1.10634
53	3837.11	96.58	0.62447	0.00412	0.62035					53	3972.5	99.99	1.11111	0.00378	1.10733
54	3919.79	98.66	0.71968	0.00434	0.71534					54	3972.67	99.99	1.11111	0.00504	1.10607
55	3956.19	99.58	0.731	0.00514	0.72586					55	3972.5	99.99	1.11111	0.00497	1.10614
56	3883.16	97.74	0.63067	0.00453	0.62614					56	3972.35	99.98	1.11111	0.00476	1.10635
57	3972.67	99.99	1.0956	0.00472	1.09088					57	3972.35	99.98	1.11111	0.00389	1.10722
58	3956.47	99.58	0.84141	0.00497	0.83644					58	3969.12	99.9	1.11111	0.00474	1.10637
59	3943.73	99.26	0.69878	0.00472	0.69406					59	3972.67	99.99	1.11111	0.00495	1.10616
60	3716.77	93.55	0.58437	0.00416	0.58021					60	3972.35	99.98	1.11111	0.00487	1.10624
61	3971.06	99.95	1.11102	0.00514	1.10588					61	3973	100	1.11111	0.00464	1.10647
62	3970.43	99.94	0.85216	0.0039	0.84826					62	3972.35	99.98	1.11111	0.00461	1.1065
63	3961.8	99.72	0.94373	0.00472	0.93901					63	3969.12	99.9	1.11111	0.00491	1.1062
64	3955.25	99.55	0.78332	0.00414	0.77918					64	3972.5	99.99	1.11111	0.00506	1.10605
65	3893.12	97.99	0.65944	0.00502	0.65442					65	3973	100	1.11111	0.0047	1.10641
66	3936.16	99.07	0.78778	0.00458	0.7832					66	3972.35	99.98	1.11111	0.00445	1.10666
67	3962.67	99.74	0.94152	0.00444	0.93708					67	3973	100	1.11111	0.00544	1.10567
68	3970.41	99.93	1.0488	0.00429	1.04451					68	3970.95	99.95	1.11111	0.00456	1.10655
69	3970.41	99.93	0.82185	0.00405	0.8178					69	3971.98	99.97	1.11111	0.00426	1.10685
70	3789.53	95.38	0.64876	0.00511	0.64365					70	3968.88	99.9	1.11111	0.00495	1.10616
71	3902.34	98.22	0.67352	0.00466	0.66886					71	3973	100	1.11111	0.00433	1.10678
72	3837.7	96.59	0.68999	0.00473	0.68526					72	3973	100	1.11111	0.00503	1.10608
73	3881.49	97.7	0.70004	0.0042	0.69584					73	3973.01	100	1.11111	0.00516	1.10595
74	3857.82	97.1	0.70632	0.00515	0.70117					74	3972.67	99.99	1.11111	0.00442	1.10669
75	3849.45	96.89	0.71177	0.00323	0.70854					75	3971.98	99.97	1.11111	0.0057	1.10541
76	3818.95	96.12	0.70106	0.00436	0.6967					76	3972.35	99.98	1.11111	0.00524	1.10587
77	3868.38	97.37	0.73062	0.00456	0.72606					77	3972.67	99.99	1.11111	0.00471	1.1064
78	3852.5	96.97	0.72663	0.00473	0.7219					78	3973	100	1.11111	0.00463	1.10648
79	3940.82	99.19	0.78434	0.00529	0.77905					79	3968.88	99.9	1.11111	0.00454	1.10657
80	3906.84	98.33	0.67133	0.0044	0.66693					80	3969.12	99.9	1.11111	0.00466	1.10645
81	3952.41	99.48	0.6951	0.00396	0.69114					81	3972.67	99.99	1.11111	0.00529	1.10582
82	3892.88	97.98	0.6778	0.0053	0.6725					82	3969.44	99.91	1.11111	0.00475	1.10636
83	3904.01	98.26	0.66605	0.00455	0.6615					83	3972.5	99.99	1.11111	0.00503	1.10608
84	3848.05	96.85	0.73899	0.0052	0.73379					84	3971.98	99.97	1.11111	0.00442	1.10669
85	3800.34	95.65	0.62366	0.00444	0.61922					85	3963.3	99.76	1.11111	0.00461	1.1065
86	3971.46	99.96	0.9853	0.00427	0.98103					86	3971.98	99.97	1.11111	0.00499	1.10612
87	3971.06	99.95	0.94422	0.00486	0.93936					87	3970.41	99.93	1.11111	0.00451	1.1066
88	3926.14	98.82	0.82858	0.00476	0.82382					88	3970.73	99.94	1.11111	0.00498	1.10613
89	3881.31	97.69	0.68211	0.00535	0.67676					89	3972.35	99.98	1.11111	0.00353	1.10758
90	3732.63	93.95	0.7284	0.00461	0.72379					90	3972.5	99.99	1.11111	0.0047	1.10641
91	3912.01	98.46	0.73105	0.0046	0.72645					91	3971.06	99.95	1.11111	0.00448	1.10663
92	3930.22	98.92	0.66604	0.00503	0.66101					92	3973	100	1.11111	0.00394	1.10717
93	3881.51	97.7	0.69908	0.00501	0.69407					93	3973.01	100	1.11111	0.00503	1.10608
94	3945.1	99.3	0.73119	0.00434	0.72685					94	3971.46	99.96	1.11111	0.00464	1.10647
95	3854.42	97.02	0.68201	0.00422	0.67779					95	3969.44	99.91	1.11111	0.00358	1.10753
96	3939.06	99.15	0.87126	0.00383	0.86743					96	3973	100	1.11111	0.00535	1.10576
97	3879.3	97.64	0.64924	0.00437	0.64487					97	3971.06	99.95	1.11111	0.00452	1.10659
98	3883.12	97.74	0.6052	0.00475	0.60045					98	3967.5	99.86	1.11111	0.00461	1.1065
99	3901.9	98.21	0.66036	0.00546	0.6549					99	3968.36	99.88	1.11111	0.00544	1.10567
100	3855.5	97.04	0.65391	0.00496	0.64895					100	3972.67	99.99	1.11111	0.00479	1.10632
101	3902.64	98.23	0.73058	0.0032	0.72738					101	3971.98	99.97	1.11111	0.00423	1.10688
102	3819.47	96.14	0.62713	0.00479	0.62234					102	3972.67	99.99	1.11111	0.00424	1.10687
103	3965.26	99.8	0.92177	0.00472	0.91705					103	3968.36	99.88	1.11111	0.00523	1.10588
104	3842.22	96.71	0.6754	0.00419	0.67121					104	3972.67	99.99	1.11111	0.00535	1.10576
105	3924.42	98.78	0.71316	0.00406	0.7091					105	3973	100	1.11111	0.00493	1.10618
106	3836.3	96.56	0.67214	0.0046	0.66754					106	3972.35	99.98	1.11111	0.00488	1.10623
107	3972.03	99.98	1.103	0.00438	1.09862					107	3971.98	99.97	1.11111	0.00424	1.10687
108	3869.1	97.38	0.69508	0.00451	0.69057					108	3972.35	99.98	1.11111	0.00486	1.10625
109	3898.44	98.12	0.90388	0.00499	0.89889					109	3963.3	99.76	1.11111	0.00495	1.10616
110	3971.46	99.96	1.03529	0.00352	1.03177					110	3972.5	99.99	1.11111	0.00369	1.10742
111	3972.5	99.99	1.08322	0.00474	1.07848					111	3972.67	99.99	1.11111	0.00477	1.10634
112	3925.61	98.81	0.86687	0.0038	0.86307					112	3969.39	99.91	1.11111	0.00558	1.10553
113	3879.9	97.66	0.72156	0.00536	0.7162					113	3972.67	99.99	1.11111	0.00477	1.10634
114	3969.12	99.9	0.6595	0.00419	0.65531					114	3972.67	99.99	1.11111	0.00493	1.10618
115	3939.41	99.15	0.71603	0.00422	0.71181					115	3972.67	99.99	1.11111	0.00383	1.10728
116	3878.48	97.62	0.67633	0.00461	0.67172					116	3971.46	99.96	1.11111	0.00536	1.10575
117	3956.98	99.6	0.66631	0.00477	0.66154					117	3973.01	100	1.11111	0.0048	1.10631
118	3867.34	97.34	0.75351	0.00552	0.74799					118	3972.5	99.99	1.11111	0.00392	1.10719
119	3889.26	97.89	0.70831	0.00385	0.70446					119	3972.67	99.99	1.11111	0.00509	1.10602
120	3926.09	98.82	0.71245	0.00504	0.70741					120	3968.8	99.89	1.11111	0.00496	1.10615
121	3955.57	99.56	0.72265	0.00542	0.71723					121	3973	100	1.11111	0.0043	1.10681
122	3925.93	98.82	0.7439	0.00329	0.74061					122	3972.35	99.98	1.11111	0.00436	1.10675
123	3903.53	98.25	0.70406	0.00569	0.69837					123	3972.35	99.98	1.11111	0.00413	1.10698
124	3908.38	98.37	0.601	0.00398	0.59702					124	3973	100	1.11111	0.00442	1.10669
125	3796.99	95.57	0.64668	0.00483	0.64185					125	3973	100	1.11111	0.0041	1.10701
126	3886.68	97.83	0.70359	0.00533	0.69826					126	3970.41	99.93	1.11111	0.00364	1.10747
127	3917.18	98.59	0.66852	0.00466	0.66386					127	3972.67	99.99	1.11111	0.00478	1.10633
128	3842.85	96.72	0.64708	0.00429	0.64279					128	3973.01	100	1.11111	0.0038	1.10731
129	3832.91	96.47	0.70824	0.00459	0.70365					129	3972.35	99.98	1.11111	0.00484	1.10627
130	3973.01	100	1.0721	0.0052	1.0669					130	3972.67	99.99	1.11111	0.00357	1.10754
131	3841.06	96.68	0.7094	0.0049	0.7045					131	3969.12	99.9	1.11111	0.00438	1.10673
132	3931.26	98.95	0.71807	0.00513	0.71294					132	3971.06	99.95	1.11111	0.0049	1.10621
133	3972.35	99.98	0.73984	0.00433	0.73551					133	3972.35	99.98	1.11111	0.00424	1.10687
134	3958.54	99.64	0.75972	0.00483	0.75489					134	3971.98	99.97	1.11111	0.00397	1.10714
135	3778.97	95.12	0.66134	0.00495	0.65639					135	3972.5	99.99	1.11111	0.00443	1.10668
136	3907.1	98.34	0.64323	0.00442	0.63881					136	3972.03	99.98	1.11111	0.00444	1.10667
137	3818.43	96.11	0.74045	0.00455	0.7359					137	3961.68	99.71	1.11111	0.00407	1.10704
138	3958.54	99.64	0.65677	0.00444	0.65233					138	3971.98	99.97	1.11111	0.00517	1.10594
139	3767.95	94.84	0.61458	0.00435	0.61023					139	3972.67	99.99	1.11111	0.00439	1.10672
140	3951.02	99.45	0.72015	0.00434	0.71581					140	3968.8	99.89	1.11111	0.00483	1.10628
141	3967.5	99.86	1.10536	0.00526	1.1001					141	3971.46	99.96	1.11111	0.00425	1.10686
142	3916.7	98.58	0.70296	0.00427	0.69869					142	3970.41	99.93	1.11111	0.00458	1.10653
143	3912.31	98.47	0.6874	0.0044	0.683					143	3972.35	99.98	1.11111	0.00425	1.10686
144	3952.96	99.5	0.63614	0.00441	0.63173					144	3972.35	99.98	1.11111	0.00544	1.10567
145	3881.49	97.7	0.62677	0.00469	0.62208					145	3972.67	99.99	1.11111	0.00493	1.10618
146	3881.47	97.7	0.7259	0.00424	0.72166					146	3973	100	1.11111	0.00546	1.10565
147	3972.5	99.99	1.06904	0.00359	1.06545					147	3972.67	99.99	1.11111	0.00422	1.10689
148	3912.01	98.46	0.71794	0.00464	0.7133					148	3971.06	99.95	1.11111	0.00524	1.10587
149	3928.03	98.87	0.6771	0.00474	0.67236					149	3972.67	99.99	1.11111	0.00464	1.10647
150	3971.98	99.97	1.032	0.00386	1.02814					150	3972.5	99.99	1.11111	0.00461	1.1065
151	3972.35	99.98	1.09857	0.00461	1.09396					151	3972.35	99.98	1.11111	0.00504	1.10607
152	3958.89	99.64	0.64552	0.00541	0.64011					152	3972.67	99.99	1.11111	0.0049	1.10621
153	3928.08	98.87	0.71841	0.00552	0.71289					153	3972.67	99.99	1.11111	0.00488	1.10623
154	3886.68	97.83	0.67405	0.00483	0.66922					154	3973	100	1.11111	0.00484	1.10627
155	3895.27	98.04	0.65266	0.00572	0.64694					155	3972.03	99.98	1.11111	0.00537	1.10574
156	3804.99	95.77	0.72797	0.00465	0.72332					156	3972.67	99.99	1.11111	0.00479	1.10632
157	3954.58	99.54	0.60999	0.00527	0.60472					157	3971.46	99.96	1.11111	0.00491	1.1062
158	3881.18	97.69	0.60593	0.00436	0.60157					158	3972.67	99.99	1.11111	0.00389	1.10722
159	3912.9	98.49	0.7404	0.00452	0.73588					159	3953.93	99.52	1.11111	0.00497	1.10614
160	3886.83	97.83	0.76487	0.00457	0.7603					160	3972.67	99.99	1.11111	0.00491	1.1062
161	3908.84	98.38	0.79375	0.00371	0.79004					161	3973.01	100	1.11111	0.00399	1.10712
162	3911.92	98.46	0.67695	0.00418	0.67277					162	3969.12	99.9	1.11111	0.00455	1.10656
163	3909.43	98.4	0.67784	0.00477	0.67307					163	3971.06	99.95	1.11111	0.00471	1.1064
164	3912.53	98.48	0.63038	0.00456	0.62582					164	3972.35	99.98	1.11111	0.00417	1.10694
165	3842.78	96.72	0.65538	0.00485	0.65053					165	3972.67	99.99	1.11111	0.00503	1.10608
166	3962.59	99.74	0.70459	0.00466	0.69993					166	3971.98	99.97	1.11111	0.00527	1.10584
167	3949.75	99.41	0.6874	0.00559	0.68181					167	3973.01	100	1.11111	0.00455	1.10656
168	3920.8	98.69	0.72232	0.00452	0.7178					168	3973	100	1.11111	0.00466	1.10645
169	3673.75	92.47	0.70772	0.00544	0.70228					169	3967.5	99.86	1.11111	0.00507	1.10604
170	3834.14	96.5	0.62831	0.00462	0.62369					170	3968.8	99.89	1.11111	0.00456	1.10655
171	3799.3	95.63	0.67	0.00435	0.66565					171	3972.67	99.99	1.11111	0.00373	1.10738
172	3852.55	96.97	0.6651	0.00483	0.66027					172	3971.98	99.97	1.11111	0.00447	1.10664
173	3971.98	99.97	1.01881	0.00348	1.01533					173	3969.44	99.91	1.11111	0.00497	1.10614
174	3971.98	99.97	1.10735	0.00469	1.10266					174	3972.35	99.98	1.11111	0.00415	1.10696
175	3930.1	98.92	0.65863	0.00448	0.65415					175	3972.35	99.98	1.11111	0.0043	1.10681
176	3881.6	97.7	0.631	0.0055	0.6255					176	3970.73	99.94	1.11111	0.00485	1.10626
177	3945.61	99.31	0.6905	0.00479	0.68571					177	3968.8	99.89	1.11111	0.00481	1.1063
178	3945.1	99.3	0.70363	0.0047	0.69893					178	3972.35	99.98	1.11111	0.00559	1.10552
179	3898.64	98.13	0.6888	0.00474	0.68406					179	3972.67	99.99	1.11111	0.00478	1.10633
180	3879.95	97.66	0.69955	0.00579	0.69376					180	3972.35	99.98	1.11111	0.00501	1.1061
181	3917.7	98.61	0.75751	0.00469	0.75282					181	3971.46	99.96	1.11111	0.00442	1.10669
182	3937.34	99.1	0.63188	0.00457	0.62731					182	3973	100	1.11111	0.00452	1.10659
183	3720.63	93.65	0.52914	0.00362	0.52552					183	3970.41	99.93	1.11111	0.00515	1.10596
184	3958.02	99.62	0.67554	0.00502	0.67052					184	3970.41	99.93	1.11111	0.00459	1.10652
185	3908.69	98.38	0.69027	0.00515	0.68512					185	3972.35	99.98	1.11111	0.00581	1.1053
186	3877.7	97.6	0.6855	0.00424	0.68126					186	3970.95	99.95	1.11111	0.00487	1.10624
187	3899.77	98.16	0.69226	0.00463	0.68763					187	3971.98	99.97	1.11111	0.0045	1.10661
188	3879.63	97.65	0.65333	0.00453	0.6488					188	3972.35	99.98	1.11111	0.00483	1.10628
189	3973.01	100	1.10297	0.00501	1.09796					189	3972.5	99.99	1.11111	0.00505	1.10606
190	3899.08	98.14	0.62791	0.00467	0.62324					190	3969.39	99.91	1.11111	0.00444	1.10667
191	3957.5	99.61	0.76842	0.00502	0.7634					191	3972.5	99.99	1.11111	0.00451	1.1066
192	3958.54	99.64	0.79271	0.00462	0.78809					192	3972.5	99.99	1.11111	0.00475	1.10636
193	3972.67	99.99	1.10251	0.00532	1.09719					193	3970.73	99.94	1.11111	0.00495	1.10616
194	3971.98	99.97	1.03099	0.00428	1.02671					194	3972.67	99.99	1.11111	0.00454	1.10657
195	3856.8	97.07	0.78575	0.0042	0.78155					195	3972.67	99.99	1.11111	0.00377	1.10734
196	3970.41	99.93	1.07199	0.0045	1.06749					196	3972.67	99.99	1.11111	0.00497	1.10614
197	3958.57	99.64	0.65195	0.00497	0.64698					197	3972.5	99.99	1.11111	0.00451	1.1066
198	3870.38	97.42	0.60447	0.00496	0.59951					198	3972.67	99.99	1.11111	0.00413	1.10698
199	3787.64	95.33	0.67882	0.00514	0.67368					199	3972.5	99.99	1.11111	0.0049	1.10621
200	3831.17	96.43	0.72292	0.00474	0.71818					200	3972.67	99.99	1.11111	0.00448	1.10663

[truncated: 1 more sheets: 10_MMACO_Seeds(25)]
