# Supplementary material for: Enhanced Hyper-Cube Framework Aco for Combinatorial Optimization Problems
Source: Preprints.org preprint supplement (doi:10.20944/preprints202108.0573.v1), 2021-08-31
Supplement: Supplementary file 10 [file 05_HCFACO_@_Seeds(75)_Exp.xlsx]

## Sheet: 05_HCFACO_@_Seeds(75)_Fast
Slow Convergence										Slow Convergenece
ige	Fbest(ige)	Fworst(ige)	Fmean(ige)	BWLocalDis	GlobalDis	Segma	MaxTau	MinTau		Expeirement no.(Iexp) =	16
1	3335.62	1769.56	2549.81	13	11	1	0.0092	0.0092		Seeds=	75
2	3756.91	1663.74	2860.84	11	5	1	0.0145	0.0145		Number of variables =	16
3	3756.91	2054.27	3132.32	10	5	1	0.0193	0.0193		no. of Ants =	25
4	3817.28	1674.8	3103.08	12	6	1	0.0242	0.0242		Maximum CBLF(fopt) =	3973.01
5	3863.97	2520.87	3339.99	10	5	1	0.0288	0.0288		Optimal Solution(xopt) =	333332232223222
6	3863.97	2650.8	3371.09	7	5	1	0.0334	0.0334		Number of Practical Optima =	1
7	3887.15	2654.79	3410.83	10	4	1	0.038	0.0334		no. of Iterations(ige) =	22
8	3887.15	2717.78	3443.21	7	4	1	0.0425	0.0376		1st Global optima Found @ ige =	12
9	3894.62	2545.06	3591.34	9	3	1	0.0468	0.0419		Minimum Best Solution =	3335.62
10	3894.62	3402.74	3696.02	8	3	1	0.051	0.0461		Mean of Best Solution =	3890.97
11	3939.93	3220.15	3590.96	9	4	1	0.0554	0.0505		SD of Best Solution =	142.719
12	3973.01	2702.31	3561.35	8	0	1	0.0599	0.0505		Fitness Distance Correlation =	-362.468
13	3973.01	2679.84	3628.73	7	0	1	0.0643	0.0505		Correlation Coefficent =	-0.85453
14	3973.01	2892.57	3625.31	5	0	1	0.0687	0.0505		Elapsed Time =	1.0194
15	3973.01	2776.97	3673.31	6	0	1	0.073	0.0505
16	3973.01	3148.91	3768.46	7	0	1	0.0772	0.0505
17	3973.01	3237.99	3725.72	6	0	1	0.0815	0.0505
18	3973.01	3331.4	3829.25	5	0	1	0.0856	0.0505
19	3973.01	3239.86	3687.32	5	0	1	0.0899	0.0505
20	3973.01	2972.02	3682.91	7	0	1	0.0942	0.0505
21	3973.01	3291.99	3713.47	6	0	1	0.0985	0.0505
22	3973.01	3490.71	3828.57	6	0	2	0.1068	0.0505

## Sheet: 05_HCFACO_@_Seeds(75)_Slow
Slow Convergence										Slow Convergenece
ige	Fbest(ige)	Fworst(ige)	Fmean(ige)	BWLocalDis	GlobalDis	Segma	MaxTau	MinTau		Expeirement no.(Iexp) =	14
1	3548.7	1722.41	2650.65	12	4	1	0.0094	0.0094		Seeds=	75
2	3705.09	2259.23	3009.92	12	6	1	0.0143	0.0094		Number of variables =	16
3	3753.45	2059.21	2956.09	11	7	1	0.0194	0.0144		no. of Ants =	25
4	3867.03	2237.34	3221.56	15	4	1	0.0242	0.0144		Maximum CBLF(fopt) =	3973.01
5	3922.26	3095.71	3616.86	9	4	1	0.0285	0.0144		Optimal Solution(xopt) =	323332333323333
6	3922.26	2738.87	3500.89	7	4	1	0.033	0.0144		Number of Practical Optima =	1
7	3922.26	3040.74	3522.62	7	4	1	0.0374	0.0144		no. of Iterations(ige) =	93
8	3939.71	2806.48	3446.66	10	6	1	0.042	0.0144		1st Global optima Found @ ige =	37
9	3954.02	3158.83	3576.26	8	6	1	0.0464	0.0189		Minimum Best Solution =	3548.7
10	3959.1	3082.91	3657.69	8	6	1	0.0508	0.0189		Mean of Best Solution =	3958.56
11	3961.64	3049.83	3603.3	9	5	1	0.0552	0.0189		SD of Best Solution =	57.3128
12	3961.64	2794.76	3590.01	6	5	1	0.0596	0.0227		Fitness Distance Correlation =	-48.4091
13	3961.64	2564.32	3594.56	7	5	1	0.064	0.0271		Correlation Coefficent =	-0.36367
14	3961.64	2751.44	3690.39	8	5	1	0.0683	0.0314		Elapsed Time =	4.2612
15	3961.64	3165.66	3721.85	6	5	1	0.0725	0.0357
16	3961.64	3420.3	3790.42	6	5	1	0.0767	0.0398
17	3967.18	3203.64	3678.3	4	5	1	0.081	0.0398
18	3967.18	3352.88	3746.03	7	5	1	0.0853	0.0398
19	3967.18	2858.3	3752.28	11	5	1	0.0895	0.0398
20	3967.18	3588.77	3827.17	6	5	1	0.0936	0.0398
21	3968.88	3080.63	3792.36	6	6	1	0.0978	0.0398
22	3968.88	3484.91	3808.42	7	6	1	0.102	0.0398
23	3968.88	3457.62	3729.53	5	6	1	0.1062	0.0398
24	3968.88	3302.65	3798.08	6	6	1	0.1104	0.0398
25	3973	3457.59	3751.14	6	3	1	0.1147	0.0398
26	3973	3259.75	3781.47	5	3	1	0.1189	0.0398
27	3973	3355.83	3794.59	5	3	1	0.1231	0.0398
28	3973	3508.28	3816.91	6	3	1	0.1272	0.0398
29	3973	3409.17	3809.25	4	3	1	0.1314	0.0398
30	3973	3399.41	3792.12	6	3	1	0.1356	0.0398
31	3973	3189.74	3714.27	5	3	1	0.1399	0.0398
32	3973	3313.51	3817.83	4	3	1	0.144	0.0398
33	3973	3341.55	3809.78	7	3	1	0.1482	0.0398
34	3973	2830.61	3734.03	5	3	1	0.1524	0.0398
35	3973	3287.98	3788.11	5	3	1	0.1566	0.0398
36	3973	3440.87	3851.94	5	3	1	0.1608	0.0398
37	3973.01	3507.72	3837.28	4	0	2	0.1691	0.0398
38	3973.01	3615.77	3852.97	5	0	1	0.1732	0.0398
39	3973.01	3337.22	3806.62	6	0	1	0.1774	0.0398
40	3973.01	3366.3	3795.17	6	0	1	0.1815	0.0398
41	3973.01	3407.59	3789.88	5	0	2	0.1899	0.0398
42	3973.01	3309.67	3857.82	3	0	1	0.194	0.0398
43	3973.01	3413.51	3811.16	3	0	1	0.1982	0.0398
44	3973.01	3589.95	3859.58	5	0	2	0.2065	0.0398
45	3973.01	3501.09	3837.63	2	0	1	0.2106	0.0398
46	3973.01	3497.2	3818.76	4	0	2	0.2189	0.0398
47	3973.01	3481.24	3832.28	4	0	1	0.2231	0.0398
48	3973.01	3479.29	3828.84	4	0	1	0.2272	0.0398
49	3973.01	3251.46	3795.82	7	0	1	0.2314	0.0398
50	3973.01	3393.66	3789.31	5	0	1	0.2356	0.0398
51	3973.01	3355.52	3822.04	5	0	1	0.2398	0.0398
52	3973.01	3353.26	3787.91	4	0	2	0.2481	0.0398
53	3973.01	2797.7	3764.32	6	0	1	0.2524	0.0398
54	3973.01	3507.72	3800.06	5	0	2	0.2607	0.0398
55	3973.01	3476.18	3823.9	3	0	1	0.2649	0.0398
56	3973.01	3127.67	3813.92	5	0	1	0.2691	0.0398
57	3973.01	3525.5	3859.13	5	0	2	0.2773	0.0398
58	3973.01	2943.4	3773.38	5	0	1	0.2815	0.0398
59	3973.01	3376.22	3821.54	6	0	1	0.2857	0.0398
60	3973.01	3283.49	3804.28	4	0	1	0.2898	0.0398
61	3973.01	3075.79	3815.66	5	0	1	0.294	0.0398
62	3973.01	3624.53	3869.45	6	0	1	0.2981	0.0398
63	3973.01	3329.7	3860.08	6	0	2	0.3063	0.0398
64	3973.01	3507.2	3821	3	0	1	0.3105	0.0398
65	3973.01	3585.1	3823.28	2	0	1	0.3147	0.0398
66	3973.01	3515.2	3839.57	4	0	4	0.3312	0.0398
67	3973.01	3751.3	3890.4	3	0	1	0.3353	0.0398
68	3973.01	2714.39	3846.13	4	0	3	0.3477	0.0398
69	3973.01	3687.53	3876.53	5	0	1	0.3518	0.0398
70	3973.01	3155.48	3846.58	4	0	3	0.3642	0.0398
71	3973.01	3433.22	3811.99	2	0	1	0.3684	0.0398
72	3973.01	3615.77	3878.68	4	0	5	0.3888	0.0398
73	3973.01	3580.9	3873.91	3	0	1	0.3929	0.0398
74	3973.01	3448.39	3847.36	4	0	2	0.4012	0.0398
75	3973.01	3600.29	3878.88	3	0	4	0.4176	0.0398
76	3973.01	3708.65	3898.23	3	0	6	0.4421	0.0398
77	3973.01	3791.99	3912.91	3	0	4	0.4583	0.0398
78	3973.01	3647.31	3854.17	2	0	1	0.4624	0.0398
79	3973.01	3754.84	3903.04	2	0	2	0.4706	0.0398
80	3973.01	3074.64	3821.02	4	0	4	0.4872	0.0398
81	3973.01	3737.41	3891.66	4	0	4	0.5035	0.0398
82	3973.01	3726.42	3886.01	2	0	5	0.524	0.0398
83	3973.01	3529.55	3890.71	5	0	7	0.5526	0.0398
84	3973.01	3520.8	3851.59	1	0	3	0.565	0.0398
85	3973.01	3490.19	3908.47	2	0	8	0.5975	0.0398
86	3973.01	3718.52	3906.91	2	0	8	0.63	0.0398
87	3973.01	3476.18	3871.39	3	0	7	0.6588	0.0398
88	3973.01	3376.85	3869.56	1	0	6	0.6834	0.0398
89	3973.01	3785.01	3905	3	0	9	0.72	0.0398
90	3973.01	3693.46	3899.67	2	0	7	0.7486	0.0398
91	3973.01	3801.89	3928.33	2	0	7	0.7769	0.0398
92	3973.01	3357.14	3881.94	2	0	3	0.7892	0.0398
93	3973.01	3483.5	3896.64	3	0	12	0.8381	0.0398
