# Supplementary material for: Enhanced Hyper-Cube Framework Aco for Combinatorial Optimization Problems
Source: Preprints.org preprint supplement (doi:10.20944/preprints202108.0573.v1), 2021-08-31
Supplement: Supplementary file 11 [file 05_HCFACO_Seeds_Results.xlsx]

## Sheet: 00_Index
		Global optimal solution		Relaibility (%)		Normalized Price (iteration)		Correlation Coefficent		Performance rate		Elapsed time (Sec)		Solution Quality
		Fast convergence	Slow Convergence	Fast convergence	Slow Convergence	Fast convergence	Slow Convergence	Fast convergence	Slow Convergence	Fast convergence	Slow Convergence	Fast convergence	Slow Convergence	Fast convergence	Slow Convergence
	Seed (301)	3973.01	3973.01	77	93	37.7273	93.7527	-0.65893	-0.6823	0.026506	0.010666	1.3749	4.3394	99.928	99.9718
	Seed (2)	3973.01	3973.01	80.5	93.5	35.7578	95.1283	-0.6791	-0.68162	0.027966	0.010512	1.346	4.1548	99.9424	99.9757
	Seed (50)	3973.01	3973.01	72	96.5	39.7569	89.8653	-0.67452	-0.66769	0.025153	0.011128	1.3381	4.0102	99.9265	99.9769
	Seed (75)	3973.01	3973.01	77.5	93	35.4065	93.9731	-0.69433	-0.67071	0.028243	0.010641	1.2894	4.0763	99.935	99.9716
	Seed (111)	3973.01	3973.01	75	93.5	37.1867	94.5668	-0.66704	-0.68345	0.026891	0.010575	1.3109	4.1022	99.9261	99.9754
	Seed (200)	3973.01	3973.01	74.5	97.5	39.1745	89.8154	-0.6759	-0.66396	0.025527	0.011134	1.3635	4.0967	99.9278	99.9782
	Seed (167)	3973.01	3973.01	81	92	35.821	94.5326	-0.66169	-0.69259	0.027917	0.010578	1.5162	4.0468	99.9426	99.974
	Seed (225)	3973.01	3973.01	78	90.5	36.141	95.7293	-0.66527	-1	0.028427	0.010446	1.3641	4.0302	99.9358	99.9721
	Seed (11)	3973.01	3973.01	78.5	91.5	35.1783	98.1967	-0.66527	-0.68261	0.028427	0.010184	1.2874	4.2019	99.9324	99.9705
	Seed (25)	3973.01	3973.01	77	90.5	36.9545	96.8619	-0.66486	-0.69132	0.02706	0.010324	1.3403	4.4696	99.9379	99.965
			Fast Convergence						Slow Convergence
			Relaibility (%)	Normalized Price (iteration)	Correlation Coefficent	Performance Rate	Elapsed time (sec)		Relaibility (%)	Normalized Price (iteration)	Correlation Coefficent	Performance Rate	Elapsed time (sec)
		Min.	72	35.1783	-0.69433	0.025153	0.010184	Min.	90.5	89.8154	-1	0.010184	4.0102
		Max.	81	39.7569	-0.65893	0.028427	0.011134	Max.	97.5	98.1967	-0.66396	0.011134	4.4696
		Mean	77.1	36.9104	-0.670691	0.0272117	0.0106188	Mean	93.15	94.2422	-0.711625	0.0106188	4.15281
		Median	77.25	36.5478	-0.666155	0.0274885	0.0105765	Median	93	94.5497	-0.682455	0.0105765	4.09945
		Standrad division	2.5865	1.49477	0.00998375	0.00113067	0.000291246	Standrad division	2.20284	2.54466	0.0965438	0.000291246	0.139914
			Solution Quality
			Fast Conv.	Slow Conv.
		Min.	99.9261	99.965
		Max.	99.9426	99.9782
		Mean	99.9335	99.9731
		Median	99.9337	99.9731
		Standrad division	0.00597164	0.00361408

## Sheet: 01_HCFACO_Seeds(301)
Fast Converegnce Exp							Fast Converegnce Exp			Slow Converegnce Exp							Slow Converegnce Exp
#	CBLF	Quality	Taumax	Taumin	DeltaTauminmax		Global Optimal Solution =	3973.01		#	CBLF	Quality	Taumax	Taumin	DeltaTauminmax		Global Optimal Solution =	3973.01
1	3971.52	99.96	0.18649	0.00888	0.17761		Minimum Optimal Solution =	3932.02		1	3972.35	99.98	2.4598	0.00888	2.45092		Minimum Optimal Solution =	3962.98
2	3970.95	99.95	0.15086	0.00956	0.1413		Mean of Optimal Solution =	3970.15		2	3972.67	99.99	3.11293	0.00939	3.10354		Mean of Optimal Solution =	3971.89
3	3972.35	99.98	0.12224	0.00914	0.1131		Median of Optimal Solution =	3970.15		3	3973	100	2.16515	0.00904	2.15611		Median of Optimal Solution =	3971.89
4	3972.67	99.99	0.14538	0.00925	0.13613		Solution Standrad Deviation =	5.2082		4	3973	100	3.74952	0.004	3.74552		Solution Standrad Deviation =	1.597
5	3971.06	99.95	0.11358	0.00939	0.10419		Average Price =	29.05		5	3972.67	99.99	2.4802	0.00944	2.47076		Average Price =	87.19
6	3972.35	99.98	0.13118	0.00924	0.12194		Relability =	77		6	3972.67	99.99	0.85307	0.00954	0.84353		Relability =	93
7	3969.91	99.92	0.14051	0.00911	0.1314		Normalized Price =	37.7273		7	3971.98	99.97	1.03791	0.00894	1.02897		Normalized Price =	93.7527
8	3971.52	99.96	0.13521	0.00899	0.12622		Average Solution Quality =	99.928		8	3972.67	99.99	2.91271	0.0095	2.90321		Average Solution Quality =	99.9718
9	3971.46	99.96	0.22356	0.00922	0.21434		Average FDC =	-130.519		9	3972.03	99.98	3.06519	0.00916	3.05603		Average FDC =	-57.7232
10	3972.67	99.99	0.18392	0.00921	0.17471		Correlation Coefficent =	-0.65893		10	3973	100	3.60092	0.00916	3.59176		Correlation Coefficent =	-0.6823
11	3972.35	99.98	0.10813	0.00927	0.09886		Solution Robustness =	762.285		11	3972.5	99.99	2.04228	0.00951	2.03277		Solution Robustness =	2487.12
12	3969.44	99.91	0.13979	0.00922	0.13057		Performance Rate =	0.026506		12	3972.5	99.99	3.13482	0.00929	3.12553		Performance Rate =	0.010666
13	3973	100	0.12024	0.00915	0.11109		Average Elapsed Time =	1.3749		13	3972.35	99.98	2.61745	0.00925	2.6082		Average Elapsed Time =	4.3394
14	3972.67	99.99	0.20438	0.00903	0.19535					14	3972.67	99.99	3.26508	0.00946	3.25562
15	3971.46	99.96	0.22734	0.00919	0.21815					15	3972.67	99.99	0.87798	0.00917	0.86881
16	3971.98	99.97	0.14424	0.004	0.14024					16	3973	100	1.13277	0.00934	1.12343
17	3972.67	99.99	0.24069	0.00933	0.23136					17	3971.06	99.95	3.93959	0.00933	3.93026
18	3972.03	99.98	0.16143	0.00948	0.15195					18	3973	100	1.43157	0.0093	1.42227
19	3972.35	99.98	0.20372	0.00895	0.19477					19	3972.67	99.99	2.48035	0.00945	2.4709
20	3972.5	99.99	0.0817	0.00912	0.07258					20	3972.67	99.99	1.55404	0.00888	1.54516
21	3972.17	99.98	0.16146	0.0092	0.15226					21	3972.35	99.98	3.35792	0.00952	3.3484
22	3972.35	99.98	0.28432	0.00897	0.27535					22	3972.67	99.99	1.51335	0.00916	1.50419
23	3967.84	99.87	0.1016	0.0094	0.0922					23	3972.35	99.98	3.06379	0.00941	3.05438
24	3968.88	99.9	0.20147	0.00951	0.19196					24	3973	100	1.0364	0.00935	1.02705
25	3966.21	99.83	0.08089	0.00921	0.07168					25	3972.67	99.99	2.08378	0.00938	2.0744
26	3971.46	99.96	0.19637	0.00911	0.18726					26	3973	100	2.25823	0.00919	2.24904
27	3968.36	99.88	0.08992	0.00935	0.08057					27	3973	100	0.59969	0.00953	0.59016
28	3972.03	99.98	0.18547	0.004	0.18147					28	3972.67	99.99	2.4556	0.00927	2.44633
29	3972.67	99.99	0.30662	0.00967	0.29695					29	3971.98	99.97	1.48177	0.00941	1.47236
30	3971.98	99.97	0.14182	0.00932	0.1325					30	3972.67	99.99	2.76139	0.00908	2.75231
31	3972.03	99.98	0.07544	0.00896	0.06648					31	3973.01	100	1.22492	0.00895	1.21597
32	3968.82	99.89	0.1355	0.00906	0.12644					32	3973.01	100	3.54891	0.00946	3.53945
33	3972.35	99.98	0.14405	0.00939	0.13466					33	3965.24	99.8	3.46462	0.00923	3.45539
34	3972.67	99.99	0.15958	0.00915	0.15043					34	3971.98	99.97	1.29942	0.00931	1.29011
35	3973	100	0.19726	0.00942	0.18784					35	3972.67	99.99	2.44599	0.00902	2.43697
36	3971.46	99.96	0.14283	0.00941	0.13342					36	3972.67	99.99	2.27992	0.009	2.27092
37	3970.41	99.93	0.11927	0.00903	0.11024					37	3973	100	3.22747	0.00937	3.2181
38	3972.67	99.99	0.1453	0.00918	0.13612					38	3970.73	99.94	1.74469	0.00927	1.73542
39	3962.77	99.74	0.10205	0.00884	0.09321					39	3972.35	99.98	2.48669	0.00922	2.47747
40	3972.35	99.98	0.23204	0.00914	0.2229					40	3972.67	99.99	1.97855	0.00935	1.9692
41	3970.73	99.94	0.06663	0.00899	0.05764					41	3970.73	99.94	1.48854	0.00892	1.47962
42	3973.01	100	0.2176	0.00922	0.20838					42	3971.06	99.95	2.41392	0.00906	2.40486
43	3972.67	99.99	0.19787	0.00917	0.1887					43	3966.86	99.85	2.9145	0.00902	2.90548
44	3971.46	99.96	0.0983	0.00922	0.08908					44	3969.44	99.91	2.45719	0.00916	2.44803
45	3967.99	99.87	0.15334	0.00946	0.14388					45	3972.35	99.98	2.62907	0.00951	2.61956
46	3973	100	0.20759	0.00917	0.19842					46	3972.67	99.99	2.56253	0.00912	2.55341
47	3973	100	0.18222	0.00925	0.17297					47	3968.88	99.9	3.74055	0.00904	3.73151
48	3967.33	99.86	0.20487	0.00885	0.19602					48	3973.01	100	0.63049	0.00961	0.62088
49	3972.35	99.98	0.18198	0.00928	0.1727					49	3972.67	99.99	1.79577	0.00914	1.78663
50	3970.41	99.93	0.12031	0.009	0.11131					50	3972.67	99.99	3.27901	0.00947	3.26954
51	3973	100	0.12652	0.00914	0.11738					51	3972.35	99.98	3.39037	0.00957	3.3808
52	3970.41	99.93	0.15199	0.00932	0.14267					52	3966.86	99.85	2.06188	0.00893	2.05295
53	3972.67	99.99	0.17635	0.00944	0.16691					53	3972.35	99.98	4.04587	0.00909	4.03678
54	3970.73	99.94	0.23187	0.00923	0.22264					54	3973	100	3.00876	0.00906	2.9997
55	3968.82	99.89	0.18168	0.0093	0.17238					55	3967.18	99.85	3.4963	0.0089	3.4874
56	3972.67	99.99	0.08994	0.00925	0.08069					56	3973	100	2.73533	0.00933	2.726
57	3962.98	99.75	0.07675	0.00955	0.0672					57	3972.67	99.99	3.25493	0.00932	3.24561
58	3963.33	99.76	0.11001	0.00936	0.10065					58	3968.36	99.88	2.8998	0.00939	2.89041
59	3968.36	99.88	0.08976	0.00922	0.08054					59	3967.5	99.86	3.75075	0.00923	3.74152
60	3972.35	99.98	0.14952	0.00891	0.14061					60	3972.5	99.99	4.12559	0.00933	4.11626
61	3970.23	99.93	0.14806	0.00916	0.1389					61	3969.12	99.9	4.01207	0.00917	4.0029
62	3968.47	99.89	0.13922	0.00955	0.12967					62	3972.5	99.99	3.05649	0.00882	3.04767
63	3972.5	99.99	0.10934	0.00927	0.10007					63	3972.67	99.99	3.37658	0.00941	3.36717
64	3973	100	0.27452	0.00968	0.26484					64	3971.06	99.95	2.17715	0.00918	2.16797
65	3966.03	99.82	0.08406	0.009	0.07506					65	3972.35	99.98	3.19962	0.00932	3.1903
66	3971.7	99.97	0.16116	0.00933	0.15183					66	3972.35	99.98	1.83322	0.00941	1.82381
67	3968.36	99.88	0.10018	0.00941	0.09077					67	3972.5	99.99	1.32464	0.00928	1.31536
68	3968.88	99.9	0.13482	0.00948	0.12534					68	3973	100	1.94119	0.00932	1.93187
69	3971.52	99.96	0.11869	0.00914	0.10955					69	3970.73	99.94	3.91816	0.00975	3.90841
70	3966.86	99.85	0.15235	0.00917	0.14318					70	3973.01	100	0.86219	0.00911	0.85308
71	3955.55	99.56	0.11815	0.00985	0.1083					71	3972.03	99.98	0.93868	0.00951	0.92917
72	3966.56	99.84	0.1186	0.0086	0.11					72	3969.44	99.91	3.20255	0.00912	3.19343
73	3973.01	100	0.19227	0.00914	0.18313					73	3972.67	99.99	2.1459	0.00989	2.13601
74	3932.02	98.97	0.1464	0.00928	0.13712					74	3971.98	99.97	2.82961	0.0089	2.82071
75	3973	100	0.22937	0.00906	0.22031					75	3973.01	100	3.27716	0.00901	3.26815
76	3968.8	99.89	0.09078	0.0097	0.08108					76	3972.35	99.98	2.09236	0.00957	2.08279
77	3972.35	99.98	0.32357	0.00922	0.31435					77	3969.39	99.91	3.00225	0.00939	2.99286
78	3973.01	100	0.21567	0.00915	0.20652					78	3972.67	99.99	0.64072	0.00943	0.63129
79	3972.35	99.98	0.15568	0.00924	0.14644					79	3973	100	3.81202	0.00896	3.80306
80	3972.67	99.99	0.20099	0.00947	0.19152					80	3972.67	99.99	2.32363	0.00931	2.31432
81	3972.67	99.99	0.15308	0.00883	0.14425					81	3973.01	100	2.28334	0.00915	2.27419
82	3970.41	99.93	0.09757	0.00914	0.08843					82	3973	100	2.61504	0.00943	2.60561
83	3970.41	99.93	0.18148	0.0095	0.17198					83	3972.67	99.99	2.02901	0.00926	2.01975
84	3970.95	99.95	0.12826	0.00934	0.11892					84	3972.5	99.99	3.16786	0.00906	3.1588
85	3971.46	99.96	0.23105	0.00887	0.22218					85	3971.98	99.97	3.18604	0.00891	3.17713
86	3973	100	0.14297	0.01001	0.13296					86	3972.35	99.98	3.26939	0.00903	3.26036
87	3959.05	99.65	0.11041	0.00923	0.10118					87	3970.41	99.93	2.02653	0.0094	2.01713
88	3972.5	99.99	0.25443	0.00946	0.24497					88	3971.46	99.96	2.89231	0.00924	2.88307
89	3971.7	99.97	0.10641	0.00933	0.09708					89	3972.67	99.99	1.96292	0.00891	1.95401
90	3970.95	99.95	0.07611	0.0092	0.06691					90	3972.35	99.98	1.88834	0.00936	1.87898
91	3970.95	99.95	0.24488	0.00922	0.23566					91	3971.46	99.96	3.75793	0.004	3.75393
92	3969.39	99.91	0.10948	0.00934	0.10014					92	3972.67	99.99	1.21948	0.00939	1.21009
93	3970.09	99.93	0.09676	0.00996	0.0868					93	3971.98	99.97	2.68589	0.00935	2.67654
94	3972.03	99.98	0.18184	0.00906	0.17278					94	3972.67	99.99	3.30707	0.00936	3.29771
95	3968.18	99.88	0.11607	0.00944	0.10663					95	3968.36	99.88	3.64564	0.00904	3.6366
96	3972.35	99.98	0.24163	0.00903	0.2326					96	3970.41	99.93	3.16317	0.00902	3.15415
97	3967.84	99.87	0.1358	0.00901	0.12679					97	3962.98	99.75	2.76707	0.00898	2.75809
98	3968.47	99.89	0.15444	0.00926	0.14518					98	3969.12	99.9	2.87134	0.004	2.86734
99	3970.41	99.93	0.16956	0.00863	0.16093					99	3970.41	99.93	0.75952	0.00888	0.75064
100	3972.67	99.99	0.21773	0.00931	0.20842					100	3972.35	99.98	3.20273	0.00898	3.19375
101	3971.06	99.95	0.14586	0.00957	0.13629					101	3969.44	99.91	3.35694	0.00977	3.34717
102	3943.29	99.25	0.10595	0.00931	0.09664					102	3970.41	99.93	1.41904	0.00921	1.40983
103	3973.01	100	0.16069	0.00935	0.15134					103	3973	100	3.15882	0.00995	3.14887
104	3972.03	99.98	0.07933	0.00937	0.06996					104	3973	100	1.07881	0.00912	1.06969
105	3967.84	99.87	0.09183	0.00935	0.08248					105	3973	100	2.98845	0.00933	2.97912
106	3970.09	99.93	0.17559	0.00905	0.16654					106	3973	100	4.16938	0.00895	4.16043
107	3973	100	0.17275	0.00937	0.16338					107	3972.5	99.99	3.5717	0.004	3.5677
108	3973	100	0.14862	0.00898	0.13964					108	3970.41	99.93	1.05611	0.00932	1.04679
109	3972.35	99.98	0.1066	0.00921	0.09739					109	3968.36	99.88	1.63352	0.00978	1.62374
110	3971.98	99.97	0.09038	0.00943	0.08095					110	3972.67	99.99	3.08027	0.00969	3.07058
111	3970.41	99.93	0.08449	0.00914	0.07535					111	3972.35	99.98	2.24685	0.00911	2.23774
112	3970.43	99.94	0.14425	0.00902	0.13523					112	3972.67	99.99	3.0665	0.00969	3.05681
113	3971.46	99.96	0.12585	0.00914	0.11671					113	3971.06	99.95	1.80252	0.00922	1.7933
114	3972.17	99.98	0.15097	0.00939	0.14158					114	3972.5	99.99	2.56698	0.00888	2.5581
115	3971.06	99.95	0.16864	0.00913	0.15951					115	3973	100	1.27079	0.00904	1.26175
116	3971.52	99.96	0.10719	0.00887	0.09832					116	3972.67	99.99	0.69735	0.00934	0.68801
117	3970.09	99.93	0.16996	0.00923	0.16073					117	3970.41	99.93	2.71381	0.00916	2.70465
118	3972.5	99.99	0.18963	0.00959	0.18004					118	3972.67	99.99	2.5688	0.00928	2.55952
119	3972.67	99.99	0.14445	0.00888	0.13557					119	3973	100	3.00518	0.00907	2.99611
120	3972.35	99.98	0.10545	0.00947	0.09598					120	3972.35	99.98	3.61769	0.00945	3.60824
121	3971.98	99.97	0.23187	0.00924	0.22263					121	3973.01	100	0.69438	0.00897	0.68541
122	3972.67	99.99	0.18236	0.00912	0.17324					122	3973.01	100	2.84109	0.00902	2.83207
123	3973.01	100	0.17719	0.00901	0.16818					123	3972.5	99.99	4.25808	0.00964	4.24844
124	3972.67	99.99	0.11527	0.00955	0.10572					124	3972.67	99.99	0.99519	0.00933	0.98586
125	3972.35	99.98	0.18085	0.0093	0.17155					125	3970.41	99.93	2.84218	0.00929	2.83289
126	3970.41	99.93	0.13418	0.0092	0.12498					126	3971.98	99.97	2.24066	0.00972	2.23094
127	3968.88	99.9	0.1104	0.00947	0.10093					127	3972.5	99.99	2.30255	0.00898	2.29357
128	3968.36	99.88	0.15817	0.00898	0.14919					128	3972.67	99.99	4.21501	0.00923	4.20578
129	3973	100	0.19741	0.00917	0.18824					129	3972.35	99.98	2.83247	0.00963	2.82284
130	3970.73	99.94	0.15084	0.00956	0.14128					130	3972.5	99.99	2.22265	0.00874	2.21391
131	3962.67	99.74	0.10662	0.00925	0.09737					131	3972.35	99.98	2.51991	0.00969	2.51022
132	3968.8	99.89	0.10239	0.00945	0.09294					132	3969.39	99.91	1.92703	0.00933	1.9177
133	3971.98	99.97	0.10238	0.00922	0.09316					133	3972.5	99.99	2.89605	0.00917	2.88688
134	3967.18	99.85	0.2065	0.00932	0.19718					134	3970.73	99.94	3.6682	0.00918	3.65902
135	3972.35	99.98	0.14746	0.00946	0.138					135	3973.01	100	2.16841	0.00945	2.15896
136	3971.98	99.97	0.11954	0.00904	0.1105					136	3972.5	99.99	3.3607	0.00933	3.35137
137	3972.67	99.99	0.17169	0.0095	0.16219					137	3972.67	99.99	3.24992	0.00876	3.24116
138	3972.67	99.99	0.14568	0.00947	0.13621					138	3973.01	100	2.57022	0.0091	2.56112
139	3970.09	99.93	0.22736	0.00934	0.21802					139	3973	100	1.11465	0.00872	1.10593
140	3972.67	99.99	0.13536	0.00935	0.12601					140	3971.98	99.97	1.82731	0.00911	1.8182
141	3970.41	99.93	0.16179	0.00906	0.15273					141	3973.01	100	2.74461	0.00947	2.73514
142	3973	100	0.13238	0.00928	0.1231					142	3968.36	99.88	1.47443	0.00921	1.46522
143	3970.95	99.95	0.11418	0.00925	0.10493					143	3972.35	99.98	2.86985	0.00938	2.86047
144	3972.35	99.98	0.13165	0.00958	0.12207					144	3972.67	99.99	2.42678	0.00904	2.41774
145	3972.5	99.99	0.33159	0.00992	0.32167					145	3971.98	99.97	1.78491	0.00949	1.77542
146	3968.8	99.89	0.08513	0.00925	0.07588					146	3972.67	99.99	2.78078	0.00886	2.77192
147	3973.01	100	0.1631	0.00939	0.15371					147	3972.5	99.99	2.61831	0.00951	2.6088
148	3972.5	99.99	0.07663	0.00947	0.06716					148	3973	100	3.46513	0.0091	3.45603
149	3968.36	99.88	0.11957	0.00897	0.1106					149	3972.35	99.98	0.82517	0.00883	0.81634
150	3972.67	99.99	0.16469	0.00955	0.15514					150	3972.67	99.99	2.0361	0.00883	2.02727
151	3971.98	99.97	0.18637	0.00882	0.17755					151	3972.03	99.98	2.63966	0.00928	2.63038
152	3971.98	99.97	0.18284	0.00884	0.174					152	3972.35	99.98	2.56306	0.009	2.55406
153	3972.35	99.98	0.12682	0.00944	0.11738					153	3973	100	0.85893	0.0096	0.84933
154	3969.76	99.92	0.13192	0.00932	0.1226					154	3970.73	99.94	3.39513	0.00925	3.38588
155	3963.71	99.77	0.14405	0.00897	0.13508					155	3973	100	1.12825	0.00908	1.11917
156	3972.67	99.99	0.06307	0.0092	0.05387					156	3971.98	99.97	2.31141	0.00921	2.3022
157	3972.67	99.99	0.24718	0.0091	0.23808					157	3972.35	99.98	3.82203	0.00894	3.81309
158	3970.23	99.93	0.12051	0.00902	0.11149					158	3972.35	99.98	1.66215	0.00913	1.65302
159	3951.82	99.47	0.07743	0.00913	0.0683					159	3970.09	99.93	2.61872	0.00905	2.60967
160	3972.67	99.99	0.22163	0.00906	0.21257					160	3973	100	1.33994	0.004	1.33594
161	3971.98	99.97	0.27957	0.00884	0.27073					161	3972.67	99.99	2.00855	0.0092	1.99935
162	3973	100	0.1714	0.00935	0.16205					162	3973.01	100	2.85238	0.00895	2.84343
163	3935.78	99.06	0.111	0.00919	0.10181					163	3972.67	99.99	2.62162	0.00922	2.6124
164	3973	100	0.21658	0.00947	0.20711					164	3969.39	99.91	2.16054	0.00969	2.15085
165	3972.35	99.98	0.08528	0.00926	0.07602					165	3972.67	99.99	3.57681	0.00919	3.56762
166	3970.41	99.93	0.16441	0.004	0.16041					166	3967.18	99.85	3.18062	0.00939	3.17123
167	3972.67	99.99	0.16551	0.00881	0.1567					167	3973.01	100	4.31274	0.00942	4.30332
168	3971.98	99.97	0.23314	0.00949	0.22365					168	3968.88	99.9	2.95856	0.00963	2.94893
169	3971.98	99.97	0.13252	0.00946	0.12306					169	3972.67	99.99	3.52755	0.00951	3.51804
170	3972.35	99.98	0.24861	0.00898	0.23963					170	3972.35	99.98	2.66204	0.00937	2.65267
171	3972.35	99.98	0.2314	0.00925	0.22215					171	3972.5	99.99	2.96052	0.00903	2.95149
172	3971.52	99.96	0.13947	0.009	0.13047					172	3972.67	99.99	1.19099	0.00911	1.18188
173	3970.73	99.94	0.16473	0.00943	0.1553					173	3972.03	99.98	1.45166	0.00895	1.44271
174	3971.46	99.96	0.15727	0.00895	0.14832					174	3973	100	3.66819	0.004	3.66419
175	3968.36	99.88	0.14548	0.009	0.13648					175	3972.67	99.99	0.93985	0.00937	0.93048
176	3972.67	99.99	0.13693	0.00907	0.12786					176	3972.35	99.98	3.92976	0.004	3.92576
177	3972.03	99.98	0.17534	0.00971	0.16563					177	3971.98	99.97	0.7951	0.00902	0.78608
178	3968.36	99.88	0.14539	0.00929	0.1361					178	3972.67	99.99	3.47024	0.00876	3.46148
179	3967.84	99.87	0.09745	0.00914	0.08831					179	3972.5	99.99	1.83547	0.0091	1.82637
180	3955.44	99.56	0.13576	0.00902	0.12674					180	3973	100	3.17533	0.00925	3.16608
181	3960.51	99.69	0.20023	0.00918	0.19105					181	3971.98	99.97	3.83472	0.00923	3.82549
182	3972.5	99.99	0.10118	0.00955	0.09163					182	3970.73	99.94	2.61338	0.00977	2.60361
183	3971.98	99.97	0.1017	0.00952	0.09218					183	3972.35	99.98	2.51173	0.00943	2.5023
184	3973.01	100	0.19205	0.00953	0.18252					184	3972.5	99.99	2.51078	0.00937	2.50141
185	3968.36	99.88	0.16105	0.00909	0.15196					185	3973.01	100	0.78764	0.00957	0.77807
186	3972.67	99.99	0.1951	0.009	0.1861					186	3973	100	2.4144	0.00912	2.40528
187	3972.35	99.98	0.30933	0.00985	0.29948					187	3971.98	99.97	2.51952	0.00901	2.51051
188	3970.41	99.93	0.12321	0.00934	0.11387					188	3972.5	99.99	3.0173	0.00924	3.00806
189	3967.84	99.87	0.11895	0.00895	0.11					189	3971.98	99.97	1.63873	0.00958	1.62915
190	3970.73	99.94	0.10255	0.00895	0.0936					190	3973.01	100	3.66162	0.00926	3.65236
191	3972.67	99.99	0.11309	0.00931	0.10378					191	3972.35	99.98	2.33689	0.00941	2.32748
192	3973	100	0.13454	0.00922	0.12532					192	3970.73	99.94	2.33551	0.0092	2.32631
193	3972.67	99.99	0.1647	0.0092	0.1555					193	3970.73	99.94	2.73496	0.00958	2.72538
194	3970.73	99.94	0.17921	0.00902	0.17019					194	3973	100	1.34979	0.00914	1.34065
195	3969.44	99.91	0.19005	0.00947	0.18058					195	3970.41	99.93	1.83514	0.00938	1.82576
196	3972.67	99.99	0.24819	0.0093	0.23889					196	3972.5	99.99	1.9383	0.00945	1.92885
197	3965.26	99.8	0.14907	0.00915	0.13992					197	3972.67	99.99	3.58899	0.00904	3.57995
198	3972.35	99.98	0.21899	0.00914	0.20985					198	3972.67	99.99	2.93807	0.00929	2.92878
199	3968.36	99.88	0.17056	0.00947	0.16109					199	3972.35	99.98	2.88011	0.00943	2.87068
200	3973.01	100	0.14803	0.00959	0.13844					200	3967.5	99.86	3.55835	0.00911	3.54924

## Sheet: 02_HCFACO_Seeds(2)
Fast Converegnce Exp							Fast Converegnce Exp			Slow Converegnce Exp							Slow Converegnce Exp
#	CBLF	Quality	Taumax	Taumin	DeltaTauminmax		Global Optimal Solution =	3973.01		#	CBLF	Quality	Taumax	Taumin	DeltaTauminmax		Global Optimal Solution =	3973.01
1	3971.98	99.97	0.20259	0.00937	0.19322		Minimum Optimal Solution =	3952.73		1	3972.03	99.98	1.78697	0.00937	1.7776		Minimum Optimal Solution =	3964.59
2	3971.2	99.95	0.1231	0.00912	0.11398		Mean of Optimal Solution =	3970.72		2	3972.35	99.98	2.66273	0.00887	2.65386		Mean of Optimal Solution =	3972.05
3	3971.98	99.97	0.117	0.00894	0.10806		Median of Optimal Solution =	3970.72		3	3973	100	2.53843	0.00934	2.52909		Median of Optimal Solution =	3972.05
4	3970.95	99.95	0.11058	0.00927	0.10131		Solution Standrad Deviation =	3.1213		4	3971.46	99.96	0.87081	0.00906	0.86175		Solution Standrad Deviation =	1.4612
5	3972.5	99.99	0.17605	0.00872	0.16733		Average Price =	28.785		5	3973	100	0.77963	0.00927	0.77036		Average Price =	88.945
6	3973	100	0.16632	0.00885	0.15747		Relability =	80.5		6	3973	100	2.90067	0.00917	2.8915		Relability =	93.5
7	3969.12	99.9	0.19896	0.00931	0.18965		Normalized Price =	35.7578		7	3972.35	99.98	2.80024	0.00894	2.7913		Normalized Price =	95.1283
8	3970.41	99.93	0.21472	0.0092	0.20552		Average Solution Quality =	99.9424		8	3968.36	99.88	1.63547	0.00911	1.62636		Average Solution Quality =	99.9757
9	3971.46	99.96	0.14005	0.00962	0.13043		Average FDC =	-131.938		9	3972.35	99.98	1.26676	0.00938	1.25738		Average FDC =	-60.2733
10	3954.72	99.54	0.07667	0.00947	0.0672		Correlation Coefficent =	-0.6791		10	3972.35	99.98	2.4059	0.0092	2.3967		Correlation Coefficent =	-0.68162
11	3971.06	99.95	0.35459	0.00986	0.34473		Solution Robustness =	1272.15		11	3973.01	100	1.78811	0.00903	1.77908		Solution Robustness =	2718.35
12	3970.73	99.94	0.28502	0.00906	0.27596		Performance Rate =	0.027966		12	3972.5	99.99	1.82571	0.00913	1.81658		Performance Rate =	0.010512
13	3973	100	0.13941	0.00908	0.13033		Average Elapsed Time =	1.346		13	3972.67	99.99	2.93567	0.00954	2.92613		Average Elapsed Time =	4.1548
14	3971.98	99.97	0.13196	0.00876	0.1232					14	3973.01	100	3.58304	0.0092	3.57384
15	3972.35	99.98	0.12783	0.004	0.12383					15	3972.67	99.99	0.49539	0.00896	0.48643
16	3972.67	99.99	0.23363	0.004	0.22963					16	3973	100	2.35992	0.00907	2.35085
17	3972.67	99.99	0.11867	0.00931	0.10936					17	3972.5	99.99	1.02786	0.00889	1.01897
18	3967.97	99.87	0.10963	0.00912	0.10051					18	3972.03	99.98	0.79297	0.00916	0.78381
19	3967.84	99.87	0.18489	0.00931	0.17558					19	3973	100	3.23286	0.00958	3.22328
20	3973.01	100	0.1528	0.00921	0.14359					20	3972.67	99.99	1.95899	0.00905	1.94994
21	3972.67	99.99	0.15671	0.00942	0.14729					21	3964.59	99.79	3.92145	0.00905	3.9124
22	3972.35	99.98	0.2405	0.00895	0.23155					22	3971.98	99.97	2.15177	0.00933	2.14244
23	3969.12	99.9	0.15953	0.00921	0.15032					23	3972.03	99.98	3.56437	0.00902	3.55535
24	3972.35	99.98	0.18466	0.0094	0.17526					24	3973	100	1.98956	0.00928	1.98028
25	3972.5	99.99	0.16066	0.00916	0.1515					25	3971.98	99.97	3.39589	0.00944	3.38645
26	3971.98	99.97	0.11171	0.00895	0.10276					26	3972.35	99.98	0.78906	0.00928	0.77978
27	3972.5	99.99	0.15279	0.00922	0.14357					27	3972.35	99.98	2.67517	0.00944	2.66573
28	3968.36	99.88	0.08551	0.009	0.07651					28	3973	100	2.26525	0.00874	2.25651
29	3972.35	99.98	0.19918	0.00939	0.18979					29	3971.98	99.97	1.04758	0.0095	1.03808
30	3972.67	99.99	0.12032	0.00903	0.11129					30	3972.03	99.98	3.69026	0.00934	3.68092
31	3971.46	99.96	0.14941	0.00908	0.14033					31	3973	100	3.27718	0.00913	3.26805
32	3972.67	99.99	0.14363	0.00936	0.13427					32	3971.98	99.97	2.84931	0.009	2.84031
33	3970.95	99.95	0.30308	0.00934	0.29374					33	3972.5	99.99	3.41851	0.0093	3.40921
34	3972.67	99.99	0.17048	0.0095	0.16098					34	3971.98	99.97	3.327	0.00948	3.31752
35	3972.5	99.99	0.13148	0.00949	0.12199					35	3972.67	99.99	2.11961	0.00931	2.1103
36	3973	100	0.13133	0.00899	0.12234					36	3972.5	99.99	2.74494	0.00908	2.73586
37	3972.67	99.99	0.15947	0.00936	0.15011					37	3966.86	99.85	3.38002	0.00939	3.37063
38	3971.7	99.97	0.19847	0.004	0.19447					38	3973	100	3.09811	0.00898	3.08913
39	3972.67	99.99	0.18039	0.00922	0.17117					39	3972.5	99.99	2.99146	0.00949	2.98197
40	3971.06	99.95	0.10213	0.004	0.09813					40	3972.67	99.99	1.09219	0.00893	1.08326
41	3968.88	99.9	0.12342	0.00958	0.11384					41	3972.67	99.99	3.47846	0.00897	3.46949
42	3967.84	99.87	0.15909	0.00961	0.14948					42	3970.41	99.93	1.67891	0.00921	1.6697
43	3971.46	99.96	0.15335	0.00948	0.14387					43	3972.67	99.99	2.92206	0.00919	2.91287
44	3972.67	99.99	0.08491	0.00936	0.07555					44	3972.67	99.99	3.55246	0.00925	3.54321
45	3964.22	99.78	0.11572	0.00937	0.10635					45	3972.67	99.99	0.81859	0.00965	0.80894
46	3970.41	99.93	0.1302	0.00905	0.12115					46	3972.67	99.99	3.33418	0.00966	3.32452
47	3958.54	99.64	0.086	0.00925	0.07675					47	3972.67	99.99	3.60582	0.00938	3.59644
48	3971.98	99.97	0.32164	0.00913	0.31251					48	3970.41	99.93	2.90476	0.00958	2.89518
49	3972.35	99.98	0.12308	0.0095	0.11358					49	3973.01	100	1.44814	0.0093	1.43884
50	3965.26	99.8	0.08966	0.00911	0.08055					50	3972.35	99.98	1.8584	0.00941	1.84899
51	3972.67	99.99	0.1956	0.0095	0.1861					51	3972.35	99.98	1.96008	0.00933	1.95075
52	3973.01	100	0.15132	0.00924	0.14208					52	3973.01	100	1.94213	0.00892	1.93321
53	3956.95	99.6	0.07199	0.00911	0.06288					53	3970.41	99.93	2.93891	0.00914	2.92977
54	3966.86	99.85	0.08044	0.00935	0.07109					54	3972.67	99.99	1.76468	0.0091	1.75558
55	3968.15	99.88	0.12768	0.00879	0.11889					55	3973	100	2.11223	0.00901	2.10322
56	3971.46	99.96	0.16927	0.004	0.16527					56	3968.88	99.9	3.08171	0.00947	3.07224
57	3968.88	99.9	0.09391	0.00918	0.08473					57	3972.35	99.98	2.22154	0.00972	2.21182
58	3971.46	99.96	0.23509	0.00916	0.22593					58	3972.67	99.99	2.57169	0.00962	2.56207
59	3970.41	99.93	0.19158	0.00898	0.1826					59	3971.98	99.97	2.70462	0.00927	2.69535
60	3970.73	99.94	0.11469	0.00966	0.10503					60	3973	100	2.60731	0.00943	2.59788
61	3972.03	99.98	0.11905	0.00904	0.11001					61	3972.67	99.99	3.73947	0.00976	3.72971
62	3969.39	99.91	0.10441	0.00886	0.09555					62	3968.88	99.9	2.72478	0.00923	2.71555
63	3972.35	99.98	0.1278	0.00967	0.11813					63	3972.35	99.98	3.00068	0.00928	2.9914
64	3971.98	99.97	0.30076	0.00914	0.29162					64	3972.67	99.99	2.37416	0.00976	2.3644
65	3966.86	99.85	0.14661	0.00935	0.13726					65	3973	100	1.78481	0.00929	1.77552
66	3965.7	99.82	0.07642	0.00941	0.06701					66	3971.98	99.97	1.90186	0.00952	1.89234
67	3966.86	99.85	0.115	0.00897	0.10603					67	3972.35	99.98	1.74556	0.00939	1.73617
68	3969.44	99.91	0.22909	0.00948	0.21961					68	3972.35	99.98	3.89824	0.004	3.89424
69	3972.03	99.98	0.09766	0.004	0.09366					69	3972.35	99.98	2.66237	0.00935	2.65302
70	3972.35	99.98	0.18112	0.00928	0.17184					70	3972.35	99.98	1.03314	0.00882	1.02432
71	3971.52	99.96	0.0851	0.00956	0.07554					71	3972.35	99.98	3.40158	0.00962	3.39196
72	3967.84	99.87	0.09431	0.00923	0.08508					72	3972.67	99.99	2.65792	0.00912	2.6488
73	3970.73	99.94	0.15703	0.00916	0.14787					73	3973.01	100	2.94019	0.00923	2.93096
74	3967.84	99.87	0.10275	0.00911	0.09364					74	3965.78	99.82	3.80896	0.0093	3.79966
75	3969.91	99.92	0.1483	0.00935	0.13895					75	3971.98	99.97	2.80391	0.00933	2.79458
76	3972.03	99.98	0.12288	0.00942	0.11346					76	3973.01	100	3.51384	0.00924	3.5046
77	3973.01	100	0.148	0.00922	0.13878					77	3972.35	99.98	2.32118	0.0094	2.31178
78	3966.86	99.85	0.08212	0.00905	0.07307					78	3973	100	3.93035	0.00933	3.92102
79	3964.22	99.78	0.08425	0.00934	0.07491					79	3972.35	99.98	1.86353	0.00957	1.85396
80	3970.95	99.95	0.08926	0.00954	0.07972					80	3973	100	0.65758	0.00918	0.6484
81	3971.52	99.96	0.1473	0.00931	0.13799					81	3973.01	100	3.06751	0.00911	3.0584
82	3972.35	99.98	0.14049	0.00933	0.13116					82	3970.41	99.93	2.80108	0.00956	2.79152
83	3972.67	99.99	0.1968	0.00924	0.18756					83	3973	100	0.73123	0.00919	0.72204
84	3972.67	99.99	0.21651	0.00896	0.20755					84	3973.01	100	0.69648	0.00914	0.68734
85	3973	100	0.12704	0.00914	0.1179					85	3971.98	99.97	3.39406	0.00924	3.38482
86	3972.5	99.99	0.2801	0.00946	0.27064					86	3972.03	99.98	3.04219	0.00931	3.03288
87	3972.67	99.99	0.225	0.00911	0.21589					87	3968.88	99.9	1.27108	0.00918	1.2619
88	3970.41	99.93	0.08936	0.00933	0.08003					88	3973	100	3.47182	0.0096	3.46222
89	3971.85	99.97	0.08086	0.00947	0.07139					89	3972.67	99.99	2.50681	0.00896	2.49785
90	3968.88	99.9	0.18991	0.00898	0.18093					90	3972.67	99.99	2.53761	0.0093	2.52831
91	3972.35	99.98	0.17239	0.00927	0.16312					91	3969.44	99.91	1.6737	0.0089	1.6648
92	3972.35	99.98	0.20774	0.00919	0.19855					92	3972.67	99.99	3.46168	0.00961	3.45207
93	3972.35	99.98	0.26732	0.00945	0.25787					93	3970.73	99.94	3.19528	0.00889	3.18639
94	3972.03	99.98	0.0816	0.00948	0.07212					94	3970.73	99.94	3.58127	0.00928	3.57199
95	3972.35	99.98	0.1819	0.00923	0.17267					95	3972.67	99.99	1.38093	0.00921	1.37172
96	3969.44	99.91	0.28704	0.0094	0.27764					96	3972.03	99.98	1.39263	0.00894	1.38369
97	3970.09	99.93	0.11772	0.00988	0.10784					97	3971.06	99.95	1.71752	0.00942	1.7081
98	3970.73	99.94	0.09842	0.00936	0.08906					98	3972.5	99.99	2.64211	0.00954	2.63257
99	3972.35	99.98	0.17773	0.00945	0.16828					99	3971.46	99.96	3.58061	0.0097	3.57091
100	3969.76	99.92	0.14911	0.00916	0.13995					100	3972.67	99.99	2.60668	0.00934	2.59734
101	3973	100	0.21175	0.00931	0.20244					101	3972.35	99.98	1.67765	0.00907	1.66858
102	3972.67	99.99	0.28894	0.00941	0.27953					102	3972.35	99.98	3.43619	0.00914	3.42705
103	3967.5	99.86	0.21353	0.00917	0.20436					103	3972.5	99.99	3.00794	0.00929	2.99865
104	3964.94	99.8	0.10743	0.00906	0.09837					104	3972.35	99.98	3.16296	0.00878	3.15418
105	3972.35	99.98	0.13151	0.00934	0.12217					105	3972.67	99.99	3.46798	0.00936	3.45862
106	3970.95	99.95	0.08967	0.00952	0.08015					106	3973	100	2.37643	0.00892	2.36751
107	3972.67	99.99	0.17329	0.00926	0.16403					107	3972.35	99.98	2.20157	0.0092	2.19237
108	3972.35	99.98	0.1141	0.00939	0.10471					108	3973	100	4.00086	0.0097	3.99116
109	3971.98	99.97	0.0975	0.00914	0.08836					109	3972.67	99.99	2.14998	0.00915	2.14083
110	3973	100	0.21051	0.00888	0.20163					110	3973.01	100	0.85925	0.00901	0.85024
111	3972.03	99.98	0.13171	0.00902	0.12269					111	3972.67	99.99	3.0103	0.00923	3.00107
112	3972.67	99.99	0.10383	0.00963	0.0942					112	3968.88	99.9	2.75958	0.00886	2.75072
113	3971.46	99.96	0.16731	0.00921	0.1581					113	3973.01	100	1.12415	0.00885	1.1153
114	3970.95	99.95	0.08981	0.00935	0.08046					114	3972.03	99.98	1.26012	0.00963	1.25049
115	3966.88	99.85	0.14842	0.00897	0.13945					115	3967.5	99.86	3.04461	0.00912	3.03549
116	3972.67	99.99	0.22472	0.00942	0.2153					116	3972.5	99.99	2.44306	0.00894	2.43412
117	3973.01	100	0.12817	0.00918	0.11899					117	3972.5	99.99	3.18379	0.00917	3.17462
118	3972.67	99.99	0.17673	0.00917	0.16756					118	3971.06	99.95	1.89535	0.00926	1.88609
119	3972.67	99.99	0.16839	0.00936	0.15903					119	3972.35	99.98	2.18654	0.00927	2.17727
120	3972.5	99.99	0.08009	0.0091	0.07099					120	3972.35	99.98	3.19638	0.00916	3.18722
121	3968.5	99.89	0.09822	0.00923	0.08899					121	3972.67	99.99	2.41056	0.00932	2.40124
122	3973	100	0.18875	0.00892	0.17983					122	3971.46	99.96	3.14172	0.00884	3.13288
123	3972.35	99.98	0.17026	0.00954	0.16072					123	3969.12	99.9	2.92543	0.00912	2.91631
124	3970.73	99.94	0.11507	0.0092	0.10587					124	3972.67	99.99	3.76056	0.00899	3.75157
125	3970.41	99.93	0.15729	0.00918	0.14811					125	3971.06	99.95	2.6	0.00918	2.59082
126	3972.35	99.98	0.17594	0.00948	0.16646					126	3972.03	99.98	3.10617	0.00921	3.09696
127	3971.52	99.96	0.09474	0.00896	0.08578					127	3973.01	100	3.59207	0.0091	3.58297
128	3971.46	99.96	0.12746	0.00924	0.11822					128	3973	100	2.52	0.00939	2.51061
129	3970.73	99.94	0.15558	0.0094	0.14618					129	3972.35	99.98	1.51138	0.00966	1.50172
130	3969.39	99.91	0.21648	0.0093	0.20718					130	3972.67	99.99	3.11881	0.00882	3.10999
131	3973	100	0.17205	0.00944	0.16261					131	3973	100	3.19381	0.0093	3.18451
132	3971.38	99.96	0.13126	0.00922	0.12204					132	3970.41	99.93	1.47183	0.009	1.46283
133	3966.03	99.82	0.16043	0.004	0.15643					133	3972.03	99.98	2.02917	0.00946	2.01971
134	3972.5	99.99	0.24579	0.00879	0.237					134	3972.67	99.99	0.9751	0.00904	0.96606
135	3972.5	99.99	0.2138	0.00957	0.20423					135	3972.67	99.99	3.45545	0.00902	3.44643
136	3972.35	99.98	0.25956	0.00939	0.25017					136	3972.03	99.98	2.38309	0.00926	2.37383
137	3971.98	99.97	0.10902	0.00917	0.09985					137	3973	100	0.55441	0.00875	0.54566
138	3973.01	100	0.19126	0.00949	0.18177					138	3971.46	99.96	2.99431	0.00937	2.98494
139	3972.67	99.99	0.11829	0.0092	0.10909					139	3972.35	99.98	2.69582	0.00959	2.68623
140	3969.44	99.91	0.12707	0.00923	0.11784					140	3972.5	99.99	2.26493	0.00944	2.25549
141	3970.95	99.95	0.09683	0.00917	0.08766					141	3973	100	3.03069	0.00915	3.02154
142	3972.5	99.99	0.19197	0.00986	0.18211					142	3972.35	99.98	2.19381	0.00927	2.18454
143	3971.98	99.97	0.12727	0.00925	0.11802					143	3972.67	99.99	1.11077	0.00913	1.10164
144	3972.35	99.98	0.27402	0.00959	0.26443					144	3972.67	99.99	0.78546	0.00913	0.77633
145	3972.67	99.99	0.18662	0.00889	0.17773					145	3972.5	99.99	3.69275	0.00932	3.68343
146	3963.19	99.75	0.38251	0.00986	0.37265					146	3971.98	99.97	0.72476	0.00904	0.71572
147	3968.82	99.89	0.10322	0.00937	0.09385					147	3972.35	99.98	1.77212	0.00953	1.76259
148	3971.46	99.96	0.21533	0.00981	0.20552					148	3969.12	99.9	0.92559	0.00918	0.91641
149	3972.35	99.98	0.15355	0.00936	0.14419					149	3972.35	99.98	3.94965	0.00931	3.94034
150	3972.5	99.99	0.3102	0.00931	0.30089					150	3971.98	99.97	2.76868	0.0089	2.75978
151	3959.75	99.67	0.09746	0.00919	0.08827					151	3972.35	99.98	2.79045	0.00919	2.78126
152	3970.09	99.93	0.13992	0.00963	0.13029					152	3971.06	99.95	3.12924	0.00936	3.11988
153	3967.99	99.87	0.1023	0.00914	0.09316					153	3972.67	99.99	2.72949	0.00921	2.72028
154	3971.46	99.96	0.17902	0.00955	0.16947					154	3972.67	99.99	0.67019	0.0093	0.66089
155	3973	100	0.2724	0.00887	0.26353					155	3972.5	99.99	0.84238	0.00889	0.83349
156	3971.46	99.96	0.16576	0.00896	0.1568					156	3972.67	99.99	2.19506	0.00885	2.18621
157	3964.27	99.78	0.29775	0.00907	0.28868					157	3972.35	99.98	1.76749	0.00927	1.75822
158	3972.17	99.98	0.19546	0.0092	0.18626					158	3971.98	99.97	3.42426	0.00925	3.41501
159	3972.35	99.98	0.15311	0.00925	0.14386					159	3973.01	100	3.48819	0.00915	3.47904
160	3972.67	99.99	0.18425	0.00873	0.17552					160	3973.01	100	2.95612	0.00938	2.94674
161	3972.67	99.99	0.06731	0.004	0.06331					161	3972.67	99.99	2.92975	0.00909	2.92066
162	3972.5	99.99	0.20188	0.00891	0.19297					162	3965.24	99.8	3.96796	0.00937	3.95859
163	3967.82	99.87	0.1109	0.00897	0.10193					163	3973	100	1.75004	0.00913	1.74091
164	3972.5	99.99	0.29629	0.0092	0.28709					164	3972.35	99.98	2.99213	0.00905	2.98308
165	3973	100	0.1856	0.0092	0.1764					165	3973.01	100	3.02846	0.00902	3.01944
166	3972.03	99.98	0.1271	0.00929	0.11781					166	3972.5	99.99	0.98876	0.00893	0.97983
167	3973.01	100	0.13224	0.00892	0.12332					167	3973.01	100	2.98341	0.0093	2.97411
168	3973.01	100	0.16196	0.0091	0.15286					168	3972.35	99.98	0.93885	0.00876	0.93009
169	3952.73	99.49	0.12258	0.00936	0.11322					169	3972.35	99.98	1.72753	0.0091	1.71843
170	3965.7	99.82	0.23053	0.00937	0.22116					170	3971.98	99.97	3.29742	0.00936	3.28806
171	3972.35	99.98	0.18685	0.00904	0.17781					171	3972.5	99.99	2.48938	0.00966	2.47972
172	3967.84	99.87	0.13222	0.00925	0.12297					172	3973.01	100	1.40843	0.009	1.39943
173	3972.67	99.99	0.25868	0.00946	0.24922					173	3972.35	99.98	3.58377	0.0095	3.57427
174	3972.35	99.98	0.1818	0.0092	0.1726					174	3971.98	99.97	3.51335	0.00969	3.50366
175	3972.03	99.98	0.21649	0.00908	0.20741					175	3972.67	99.99	0.97236	0.00894	0.96342
176	3971.98	99.97	0.32525	0.00928	0.31597					176	3973	100	1.83606	0.00899	1.82707
177	3972.5	99.99	0.34212	0.00872	0.3334					177	3972.35	99.98	1.98939	0.00898	1.98041
178	3970.95	99.95	0.12309	0.00908	0.11401					178	3968.8	99.89	3.94561	0.00991	3.9357
179	3972.35	99.98	0.20065	0.009	0.19165					179	3972.67	99.99	0.62527	0.00899	0.61628
180	3971.46	99.96	0.20194	0.00884	0.1931					180	3973	100	1.39693	0.00941	1.38752
181	3968.88	99.9	0.07265	0.0094	0.06325					181	3971.46	99.96	3.30723	0.0091	3.29813
182	3972.35	99.98	0.21509	0.00888	0.20621					182	3973.01	100	1.46414	0.00892	1.45522
183	3972.35	99.98	0.19234	0.00926	0.18308					183	3968.88	99.9	3.27016	0.00883	3.26133
184	3968.88	99.9	0.23431	0.0093	0.22501					184	3971.98	99.97	2.29481	0.00941	2.2854
185	3970.41	99.93	0.12176	0.00958	0.11218					185	3972.67	99.99	2.99957	0.00913	2.99044
186	3973.01	100	0.22899	0.00932	0.21967					186	3965.24	99.8	2.52886	0.00908	2.51978
187	3972.5	99.99	0.39455	0.004	0.39055					187	3973	100	1.70185	0.00929	1.69256
188	3969.12	99.9	0.17778	0.00913	0.16865					188	3972.5	99.99	3.55555	0.0094	3.54615
189	3972.67	99.99	0.16486	0.00945	0.15541					189	3972.67	99.99	1.2161	0.00906	1.20704
190	3968.5	99.89	0.09383	0.00884	0.08499					190	3972.67	99.99	1.73514	0.00923	1.72591
191	3973	100	0.10563	0.00893	0.0967					191	3972.35	99.98	2.1506	0.00933	2.14127
192	3971.98	99.97	0.21743	0.0093	0.20813					192	3973.01	100	1.63089	0.00941	1.62148
193	3970.09	99.93	0.22201	0.00941	0.2126					193	3972.67	99.99	2.96578	0.00886	2.95692
194	3972.35	99.98	0.2471	0.00906	0.23804					194	3973	100	0.72142	0.0093	0.71212
195	3972.5	99.99	0.16806	0.00906	0.159					195	3972.67	99.99	2.43361	0.00907	2.42454
196	3970.09	99.93	0.12842	0.0094	0.11902					196	3971.46	99.96	2.67255	0.00898	2.66357
197	3972.67	99.99	0.14347	0.00912	0.13435					197	3972.35	99.98	1.79815	0.00931	1.78884
198	3971.98	99.97	0.10692	0.004	0.10292					198	3970.41	99.93	3.10573	0.00923	3.0965
199	3973	100	0.27071	0.00933	0.26138					199	3973	100	2.98328	0.00903	2.97425
200	3968.88	99.9	0.13033	0.0092	0.12113					200	3973.01	100	2.9242	0.00914	2.91506

## Sheet: 03_HCFACO_Seeds(50)
Fast Converegnce Exp							Fast Converegnce Exp			Slow Converegnce Exp							Slow Converegnce Exp
#	CBLF	Quality	Taumax	Taumin	DeltaTauminmax		Global Optimal Solution =	3973.01		#	CBLF	Quality	Taumax	Taumin	DeltaTauminmax		Global Optimal Solution =	3973.01
1	3962.66	99.74	0.11123	0.00949	0.10174		Minimum Optimal Solution=	3939.98		1	3972.67	99.99	0.74386	0.00949	0.73437		Minimum Optimal Solution =	3966.86
2	3970.09	99.93	0.29535	0.00912	0.28623		Mean of Optimal Solution =	3970.09		2	3971.46	99.96	2.92596	0.00926	2.9167		Mean of Optimal Solution =	3972.09
3	3966.86	99.85	0.14607	0.00903	0.13704		Median of Optimal Solution =	3970.09		3	3973	100	3.38879	0.00902	3.37977		Median of Optimal Solution =	3972.09
4	3971.52	99.96	0.1798	0.00961	0.17019		Solution Standrad Deviation =	4.6004		4	3973	100	3.37317	0.00957	3.3636		Solution Standrad Deviation =	1.2088
5	3968.18	99.88	0.08111	0.00903	0.07208		Average Price =	28.625		5	3973	100	4.31402	0.00918	4.30484		Average Price =	86.72
6	3973	100	0.1604	0.00909	0.15131		Relability =	72		6	3971.98	99.97	2.54582	0.00965	2.53617		Relability =	96.5
7	3972.35	99.98	0.2054	0.00923	0.19617		Normalized Price =	39.7569		7	3973.01	100	2.61295	0.00938	2.60357		Normalized Price =	89.8653
8	3966.29	99.83	0.15024	0.00888	0.14136		Average Solution Quality =	99.9265		8	3972.67	99.99	1.93839	0.00935	1.92904		Average Solution Quality =	99.9769
9	3973.01	100	0.30288	0.00932	0.29356		Average FDC =	-127.574		9	3972.35	99.98	2.30008	0.0092	2.29088		Average FDC =	-57.2547
10	3971.98	99.97	0.17762	0.00911	0.16851		Correlation Coefficent =	-0.67452		10	3972.67	99.99	4.25802	0.00903	4.24899		Correlation Coefficent =	-0.66769
11	3970.73	99.94	0.14273	0.00918	0.13355		Solution Robustness =	862.993		11	3973	100	1.22144	0.00904	1.2124		Solution Robustness =	3286.09
12	3968.88	99.9	0.20328	0.00942	0.19386		Performance Rate =	0.025153		12	3972.67	99.99	3.40162	0.00939	3.39223		Performance Rate =	0.011128
13	3972.5	99.99	0.13937	0.00948	0.12989		Average Elapsed Time =	1.3381		13	3972.35	99.98	2.73357	0.00912	2.72445		Average Elapsed Time =	4.0102
14	3973.01	100	0.1066	0.004	0.1026					14	3971.06	99.95	2.73397	0.00947	2.7245
15	3970.09	99.93	0.11603	0.00923	0.1068					15	3972.67	99.99	1.19058	0.00908	1.1815
16	3970.73	99.94	0.19674	0.00926	0.18748					16	3970.09	99.93	3.75602	0.00924	3.74678
17	3972.35	99.98	0.12606	0.00936	0.1167					17	3973	100	2.24145	0.00976	2.23169
18	3971.98	99.97	0.16575	0.009	0.15675					18	3973	100	3.23565	0.00925	3.2264
19	3972.5	99.99	0.0889	0.0093	0.0796					19	3972.67	99.99	2.72235	0.00901	2.71334
20	3972.67	99.99	0.14329	0.00919	0.1341					20	3972.35	99.98	2.02751	0.0089	2.01861
21	3972.67	99.99	0.14133	0.00908	0.13225					21	3972.67	99.99	2.31176	0.00943	2.30233
22	3972.35	99.98	0.23302	0.00956	0.22346					22	3971.98	99.97	3.68385	0.00907	3.67478
23	3962.66	99.74	0.059	0.00946	0.04954					23	3972.35	99.98	2.37734	0.00988	2.36746
24	3970.95	99.95	0.20312	0.00931	0.19381					24	3969.39	99.91	4.08994	0.00922	4.08072
25	3968.8	99.89	0.10765	0.00864	0.09901					25	3973.01	100	2.78055	0.00945	2.7711
26	3968.82	99.89	0.08466	0.00894	0.07572					26	3972.5	99.99	2.80112	0.0092	2.79192
27	3971.98	99.97	0.20522	0.0097	0.19552					27	3971.98	99.97	2.50654	0.00954	2.497
28	3972.67	99.99	0.09001	0.00896	0.08105					28	3973	100	1.08942	0.00932	1.0801
29	3972.67	99.99	0.08448	0.00935	0.07513					29	3972.67	99.99	3.99345	0.004	3.98945
30	3973.01	100	0.0976	0.00965	0.08795					30	3972.5	99.99	2.83429	0.00929	2.825
31	3962.67	99.74	0.09567	0.00923	0.08644					31	3973.01	100	0.59656	0.0091	0.58746
32	3971.06	99.95	0.2645	0.00933	0.25517					32	3972.35	99.98	1.89788	0.00944	1.88844
33	3970.73	99.94	0.1521	0.00962	0.14248					33	3966.86	99.85	1.38388	0.00948	1.3744
34	3968.88	99.9	0.06728	0.00982	0.05746					34	3972.67	99.99	2.22179	0.00954	2.21225
35	3971.85	99.97	0.12012	0.00955	0.11057					35	3973	100	3.00486	0.00906	2.9958
36	3970.41	99.93	0.13509	0.00888	0.12621					36	3973.01	100	3.49474	0.00915	3.48559
37	3970.41	99.93	0.10352	0.00953	0.09399					37	3970.73	99.94	1.93144	0.00909	1.92235
38	3970.41	99.93	0.13245	0.00903	0.12342					38	3972.03	99.98	3.33141	0.00923	3.32218
39	3973.01	100	0.14371	0.00945	0.13426					39	3972.67	99.99	1.61307	0.00947	1.6036
40	3968.88	99.9	0.11017	0.00931	0.10086					40	3973	100	2.47656	0.00937	2.46719
41	3972.67	99.99	0.15119	0.00922	0.14197					41	3970.41	99.93	3.23261	0.00912	3.22349
42	3973.01	100	0.10237	0.00901	0.09336					42	3972.67	99.99	3.31178	0.009	3.30278
43	3971.98	99.97	0.17306	0.00933	0.16373					43	3972.35	99.98	3.10324	0.00935	3.09389
44	3973	100	0.24858	0.00936	0.23922					44	3972.35	99.98	2.93122	0.00928	2.92194
45	3970.95	99.95	0.12823	0.00914	0.11909					45	3969.12	99.9	2.65937	0.00933	2.65004
46	3968.88	99.9	0.11844	0.00922	0.10922					46	3972.67	99.99	1.08653	0.00906	1.07747
47	3971.46	99.96	0.1259	0.0094	0.1165					47	3972.67	99.99	2.33456	0.0093	2.32526
48	3971.46	99.96	0.18506	0.00877	0.17629					48	3973	100	1.1361	0.00982	1.12628
49	3969.26	99.91	0.0851	0.00908	0.07602					49	3969.12	99.9	0.79249	0.0093	0.78319
50	3972.35	99.98	0.12309	0.00939	0.1137					50	3973	100	0.62206	0.00906	0.613
51	3972.67	99.99	0.12738	0.00912	0.11826					51	3973	100	2.26412	0.004	2.26012
52	3970.09	99.93	0.11502	0.00917	0.10585					52	3971.46	99.96	2.77877	0.00889	2.76988
53	3967.5	99.86	0.17012	0.00883	0.16129					53	3973.01	100	2.44969	0.00907	2.44062
54	3972.67	99.99	0.31066	0.00907	0.30159					54	3972.67	99.99	2.3022	0.00916	2.29304
55	3970.41	99.93	0.12125	0.0094	0.11185					55	3973	100	2.59057	0.004	2.58657
56	3968.36	99.88	0.14044	0.00884	0.1316					56	3969.44	99.91	4.14445	0.00939	4.13506
57	3970.95	99.95	0.1362	0.00935	0.12685					57	3973	100	1.06548	0.00898	1.0565
58	3972.35	99.98	0.1108	0.00963	0.10117					58	3972.5	99.99	2.63148	0.00953	2.62195
59	3972.67	99.99	0.18994	0.0089	0.18104					59	3972.67	99.99	1.43797	0.00904	1.42893
60	3973	100	0.13155	0.00917	0.12238					60	3973	100	2.14617	0.00929	2.13688
61	3968.36	99.88	0.13473	0.00945	0.12528					61	3972.67	99.99	1.92436	0.0092	1.91516
62	3970.41	99.93	0.18507	0.00932	0.17575					62	3972.67	99.99	2.38433	0.00934	2.37499
63	3972.5	99.99	0.19867	0.00953	0.18914					63	3972.67	99.99	2.55802	0.00881	2.54921
64	3966.53	99.84	0.14384	0.00909	0.13475					64	3973.01	100	1.97927	0.00911	1.97016
65	3972.67	99.99	0.27046	0.00923	0.26123					65	3972.67	99.99	2.98914	0.00929	2.97985
66	3971.52	99.96	0.13627	0.00929	0.12698					66	3972.67	99.99	3.14937	0.00954	3.13983
67	3970.41	99.93	0.1175	0.00962	0.10788					67	3970.41	99.93	0.73455	0.00952	0.72503
68	3968.36	99.88	0.17016	0.00932	0.16084					68	3972.5	99.99	2.73111	0.00934	2.72177
69	3973	100	0.11961	0.00907	0.11054					69	3972.35	99.98	2.89503	0.00901	2.88602
70	3973	100	0.15566	0.00896	0.1467					70	3972.5	99.99	2.87999	0.00934	2.87065
71	3967.84	99.87	0.10138	0.0093	0.09208					71	3973.01	100	1.87072	0.00904	1.86168
72	3973.01	100	0.20897	0.00919	0.19978					72	3972.5	99.99	3.79384	0.0093	3.78454
73	3968.36	99.88	0.18267	0.00929	0.17338					73	3971.98	99.97	3.28161	0.00949	3.27212
74	3969.44	99.91	0.18872	0.00949	0.17923					74	3973.01	100	2.99206	0.00903	2.98303
75	3972.67	99.99	0.28167	0.00945	0.27222					75	3972.5	99.99	0.80513	0.00895	0.79618
76	3972.35	99.98	0.1679	0.00886	0.15904					76	3971.46	99.96	2.57134	0.0093	2.56204
77	3970.88	99.95	0.14808	0.004	0.14408					77	3967.84	99.87	3.88312	0.00937	3.87375
78	3971.46	99.96	0.20171	0.00925	0.19246					78	3973	100	2.64954	0.00903	2.64051
79	3970.41	99.93	0.10655	0.00967	0.09688					79	3972.67	99.99	2.99569	0.00918	2.98651
80	3973.01	100	0.23865	0.00961	0.22904					80	3972.35	99.98	2.10987	0.00933	2.10054
81	3973	100	0.13544	0.00939	0.12605					81	3971.06	99.95	3.31644	0.00911	3.30733
82	3971.46	99.96	0.14291	0.00924	0.13367					82	3972.35	99.98	3.13074	0.00925	3.12149
83	3973	100	0.11139	0.00961	0.10178					83	3973	100	3.53864	0.0094	3.52924
84	3972.35	99.98	0.21723	0.00922	0.20801					84	3973	100	1.88947	0.00898	1.88049
85	3972.35	99.98	0.13713	0.00916	0.12797					85	3972.35	99.98	3.08117	0.0091	3.07207
86	3973	100	0.16485	0.00924	0.15561					86	3973	100	3.76121	0.00948	3.75173
87	3967.84	99.87	0.1066	0.00893	0.09767					87	3972.67	99.99	1.64611	0.00899	1.63712
88	3972.5	99.99	0.08031	0.00975	0.07056					88	3968.88	99.9	3.15437	0.00905	3.14532
89	3966.88	99.85	0.13615	0.00924	0.12691					89	3970.73	99.94	2.85397	0.00913	2.84484
90	3973.01	100	0.14801	0.0094	0.13861					90	3968.88	99.9	1.47803	0.00931	1.46872
91	3968.36	99.88	0.17404	0.00923	0.16481					91	3972.35	99.98	1.20063	0.00927	1.19136
92	3973.01	100	0.07546	0.00955	0.06591					92	3970.41	99.93	2.16454	0.00929	2.15525
93	3972.35	99.98	0.18462	0.00956	0.17506					93	3971.98	99.97	3.2474	0.00902	3.23838
94	3970.41	99.93	0.20521	0.00941	0.1958					94	3972.67	99.99	2.93499	0.00944	2.92555
95	3972.5	99.99	0.26644	0.00929	0.25715					95	3972.5	99.99	1.90182	0.00914	1.89268
96	3971.85	99.97	0.2357	0.00929	0.22641					96	3972.67	99.99	4.21723	0.00915	4.20808
97	3973.01	100	0.19184	0.00937	0.18247					97	3969.44	99.91	3.62741	0.00894	3.61847
98	3940.44	99.18	0.15359	0.00942	0.14417					98	3972.35	99.98	2.66259	0.0092	2.65339
99	3970.41	99.93	0.14501	0.00899	0.13602					99	3972.67	99.99	2.35109	0.00897	2.34212
100	3972.35	99.98	0.23668	0.0094	0.22728					100	3972.5	99.99	2.50781	0.00916	2.49865
101	3973	100	0.16052	0.00934	0.15118					101	3973	100	3.49375	0.00902	3.48473
102	3970.95	99.95	0.14434	0.00915	0.13519					102	3971.46	99.96	2.11428	0.00895	2.10533
103	3972.67	99.99	0.11043	0.00914	0.10129					103	3973	100	2.91628	0.00937	2.90691
104	3972.67	99.99	0.16556	0.00925	0.15631					104	3972.67	99.99	3.58555	0.0093	3.57625
105	3967.84	99.87	0.09338	0.00922	0.08416					105	3973.01	100	3.61877	0.00911	3.60966
106	3972.35	99.98	0.16205	0.00928	0.15277					106	3973	100	3.45239	0.00908	3.44331
107	3973	100	0.14772	0.00974	0.13798					107	3972.35	99.98	1.92051	0.00905	1.91146
108	3972.35	99.98	0.28284	0.00903	0.27381					108	3972.67	99.99	2.54627	0.00971	2.53656
109	3971.98	99.97	0.1715	0.00939	0.16211					109	3973	100	2.64289	0.00941	2.63348
110	3970.95	99.95	0.08882	0.0097	0.07912					110	3972.5	99.99	3.34749	0.00913	3.33836
111	3965.24	99.8	0.11917	0.00927	0.1099					111	3972.67	99.99	3.64063	0.004	3.63663
112	3971.46	99.96	0.14048	0.00893	0.13155					112	3967.5	99.86	2.9178	0.00929	2.90851
113	3967.84	99.87	0.07249	0.00929	0.0632					113	3972.35	99.98	3.0339	0.00914	3.02476
114	3967.2	99.85	0.09425	0.00914	0.08511					114	3972.03	99.98	2.10891	0.00955	2.09936
115	3972.35	99.98	0.08103	0.00933	0.0717					115	3971.46	99.96	1.13509	0.00894	1.12615
116	3966.53	99.84	0.178	0.0091	0.1689					116	3969.12	99.9	1.87703	0.00901	1.86802
117	3973.01	100	0.09391	0.0092	0.08471					117	3971.46	99.96	3.88213	0.004	3.87813
118	3970.41	99.93	0.24373	0.00935	0.23438					118	3973.01	100	1.92462	0.00919	1.91543
119	3969.12	99.9	0.09251	0.00949	0.08302					119	3970.41	99.93	2.62156	0.00875	2.61281
120	3939.98	99.17	0.09309	0.00931	0.08378					120	3973	100	2.0359	0.0094	2.0265
121	3946.17	99.32	0.13857	0.00892	0.12965					121	3967.18	99.85	3.69971	0.00921	3.6905
122	3971.06	99.95	0.23656	0.00958	0.22698					122	3972.67	99.99	3.01246	0.0091	3.00336
123	3972.67	99.99	0.14198	0.00958	0.1324					123	3972.67	99.99	3.00779	0.00883	2.99896
124	3963.95	99.77	0.10524	0.0094	0.09584					124	3971.98	99.97	3.51526	0.00933	3.50593
125	3968.82	99.89	0.11099	0.00931	0.10168					125	3971.06	99.95	2.79404	0.0089	2.78514
126	3972.35	99.98	0.11321	0.00949	0.10372					126	3972.67	99.99	1.7642	0.00863	1.75557
127	3973	100	0.1225	0.00952	0.11298					127	3970.73	99.94	3.36207	0.00941	3.35266
128	3967.5	99.86	0.27664	0.00955	0.26709					128	3968.88	99.9	3.49917	0.00937	3.4898
129	3972.35	99.98	0.13637	0.00943	0.12694					129	3972.35	99.98	2.85746	0.00892	2.84854
130	3973	100	0.212	0.00896	0.20304					130	3972.67	99.99	2.77389	0.0093	2.76459
131	3972.67	99.99	0.20109	0.00886	0.19223					131	3972.67	99.99	1.93961	0.00941	1.9302
132	3968.8	99.89	0.1354	0.00897	0.12643					132	3973.01	100	2.4709	0.00946	2.46144
133	3973.01	100	0.23553	0.00939	0.22614					133	3972.35	99.98	3.51156	0.00954	3.50202
134	3972.67	99.99	0.20696	0.00927	0.19769					134	3971.06	99.95	2.58459	0.00934	2.57525
135	3971.98	99.97	0.30109	0.00934	0.29175					135	3972.35	99.98	1.78238	0.00892	1.77346
136	3971.85	99.97	0.19729	0.00915	0.18814					136	3973.01	100	0.57902	0.00929	0.56973
137	3972.35	99.98	0.14395	0.00952	0.13443					137	3972.67	99.99	1.30341	0.00905	1.29436
138	3970.95	99.95	0.16066	0.00923	0.15143					138	3971.06	99.95	2.80048	0.00905	2.79143
139	3968.88	99.9	0.08858	0.00917	0.07941					139	3973	100	2.15049	0.00934	2.14115
140	3960.51	99.69	0.09966	0.00971	0.08995					140	3972.5	99.99	2.62973	0.00875	2.62098
141	3970.43	99.94	0.08138	0.0091	0.07228					141	3969.44	99.91	3.77287	0.00976	3.76311
142	3964.27	99.78	0.12329	0.00899	0.1143					142	3971.98	99.97	1.66947	0.00888	1.66059
143	3972.67	99.99	0.17713	0.00904	0.16809					143	3971.98	99.97	3.20019	0.00903	3.19116
144	3967.84	99.87	0.22217	0.00967	0.2125					144	3972.67	99.99	2.66967	0.00958	2.66009
145	3970.73	99.94	0.14789	0.00927	0.13862					145	3972.67	99.99	2.98932	0.00924	2.98008
146	3966.88	99.85	0.10646	0.00956	0.0969					146	3972.35	99.98	2.95519	0.00979	2.9454
147	3972.67	99.99	0.30665	0.00936	0.29729					147	3972.67	99.99	2.20552	0.00943	2.19609
148	3972.35	99.98	0.17319	0.00909	0.1641					148	3970.41	99.93	3.42943	0.00918	3.42025
149	3967.5	99.86	0.16646	0.00896	0.1575					149	3972.5	99.99	3.18202	0.00959	3.17243
150	3965.26	99.8	0.08055	0.00924	0.07131					150	3972.67	99.99	1.93952	0.00919	1.93033
151	3968.8	99.89	0.16333	0.00892	0.15441					151	3972.5	99.99	3.07535	0.00919	3.06616
152	3965.26	99.8	0.10599	0.00972	0.09627					152	3972.67	99.99	1.55842	0.00876	1.54966
153	3972.67	99.99	0.24108	0.00923	0.23185					153	3972.67	99.99	3.53588	0.00934	3.52654
154	3971.98	99.97	0.08011	0.00909	0.07102					154	3972.67	99.99	1.39298	0.00903	1.38395
155	3970.09	99.93	0.16767	0.00914	0.15853					155	3972.67	99.99	2.65481	0.00938	2.64543
156	3953.52	99.51	0.11038	0.00903	0.10135					156	3972.5	99.99	1.49809	0.00894	1.48915
157	3972.5	99.99	0.16287	0.00892	0.15395					157	3972.67	99.99	4.05854	0.00912	4.04942
158	3971.98	99.97	0.16306	0.0097	0.15336					158	3972.67	99.99	2.22492	0.00904	2.21588
159	3972.35	99.98	0.14835	0.00947	0.13888					159	3973.01	100	0.60379	0.00903	0.59476
160	3972.35	99.98	0.15457	0.00946	0.14511					160	3972.67	99.99	2.38904	0.0092	2.37984
161	3967.18	99.85	0.12542	0.00948	0.11594					161	3972.35	99.98	3.00178	0.00893	2.99285
162	3968.88	99.9	0.08501	0.00916	0.07585					162	3972.03	99.98	1.95729	0.00888	1.94841
163	3971.98	99.97	0.21016	0.00887	0.20129					163	3972.5	99.99	1.43841	0.00928	1.42913
164	3972.5	99.99	0.17851	0.00927	0.16924					164	3972.35	99.98	3.25486	0.00959	3.24527
165	3968.88	99.9	0.07995	0.00945	0.0705					165	3972.67	99.99	2.306	0.00923	2.29677
166	3970.73	99.94	0.12297	0.00928	0.11369					166	3971.98	99.97	2.31886	0.00889	2.30997
167	3971.46	99.96	0.20434	0.00927	0.19507					167	3969.44	99.91	4.00953	0.00939	4.00014
168	3971.06	99.95	0.18712	0.00882	0.1783					168	3971.98	99.97	1.7016	0.00916	1.69244
169	3970.73	99.94	0.27519	0.00919	0.266					169	3973.01	100	2.76913	0.00979	2.75934
170	3970.41	99.93	0.1265	0.0092	0.1173					170	3972.67	99.99	3.87865	0.00938	3.86927
171	3972.67	99.99	0.18555	0.00924	0.17631					171	3972.35	99.98	2.89449	0.00933	2.88516
172	3972.67	99.99	0.2068	0.00932	0.19748					172	3973	100	2.32346	0.00915	2.31431
173	3966.86	99.85	0.14304	0.00949	0.13355					173	3971.98	99.97	3.31665	0.009	3.30765
174	3972.03	99.98	0.10176	0.00986	0.0919					174	3972.35	99.98	2.02776	0.00911	2.01865
175	3962.67	99.74	0.18446	0.00903	0.17543					175	3972.5	99.99	0.86298	0.00902	0.85396
176	3971.85	99.97	0.17424	0.00906	0.16518					176	3972.35	99.98	3.44329	0.00966	3.43363
177	3972.67	99.99	0.21046	0.00919	0.20127					177	3970.09	99.93	3.10081	0.00916	3.09165
178	3972.67	99.99	0.14385	0.00911	0.13474					178	3972.5	99.99	2.78423	0.00903	2.7752
179	3971.46	99.96	0.13265	0.00876	0.12389					179	3973	100	2.91521	0.00889	2.90632
180	3966.86	99.85	0.08111	0.00918	0.07193					180	3972.35	99.98	3.60922	0.0096	3.59962
181	3966.56	99.84	0.09864	0.00868	0.08996					181	3971.98	99.97	3.13435	0.00893	3.12542
182	3972.35	99.98	0.21755	0.00995	0.2076					182	3972.67	99.99	1.33597	0.00927	1.3267
183	3973	100	0.26643	0.00903	0.2574					183	3973.01	100	1.31671	0.00945	1.30726
184	3966.86	99.85	0.0851	0.00913	0.07597					184	3972.67	99.99	2.69014	0.00908	2.68106
185	3971.98	99.97	0.29845	0.00912	0.28933					185	3971.98	99.97	2.46917	0.00946	2.45971
186	3968.36	99.88	0.13209	0.00872	0.12337					186	3972.67	99.99	0.87055	0.00916	0.86139
187	3972.67	99.99	0.23132	0.00919	0.22213					187	3972.67	99.99	2.34894	0.00939	2.33955
188	3973.01	100	0.24241	0.00936	0.23305					188	3973.01	100	3.75299	0.00898	3.74401
189	3968.88	99.9	0.11941	0.0091	0.11031					189	3972.35	99.98	1.60851	0.00876	1.59975
190	3973	100	0.30706	0.00905	0.29801					190	3972.5	99.99	4.39613	0.00948	4.38665
191	3972.35	99.98	0.20803	0.00941	0.19862					191	3972.5	99.99	0.56966	0.00908	0.56058
192	3971.98	99.97	0.17226	0.00984	0.16242					192	3970.09	99.93	3.72282	0.00952	3.7133
193	3973	100	0.19669	0.00926	0.18743					193	3970.41	99.93	3.50528	0.00941	3.49587
194	3972.67	99.99	0.13893	0.00957	0.12936					194	3972.5	99.99	3.05894	0.00898	3.04996
195	3968.88	99.9	0.10516	0.0094	0.09576					195	3972.67	99.99	3.13376	0.00919	3.12457
196	3972.67	99.99	0.2367	0.00933	0.22737					196	3971.98	99.97	3.33099	0.00897	3.32202
197	3973.01	100	0.18846	0.00915	0.17931					197	3972.03	99.98	3.8487	0.00927	3.83943
198	3970.43	99.94	0.149	0.00958	0.13942					198	3970.41	99.93	3.10649	0.00972	3.09677
199	3970.09	99.93	0.17552	0.00948	0.16604					199	3973.01	100	1.5262	0.00941	1.51679
200	3954.02	99.52	0.1492	0.00912	0.14008					200	3970.41	99.93	3.08659	0.00892	3.07767

## Sheet: 04_HCFACO_Seeds(75)
Fast Converegnce Exp							Fast Converegnce Exp			Slow Converegnce Exp							Slow Converegnce Exp
#	CBLF	Quality	Taumax	Taumin	DeltaTauminmax		Global Optimal Solution =	3973.01		#	CBLF	Quality	Taumax	Taumin	DeltaTauminmax		Global Optimal Solution =	3973.01
1	3971.85	99.97	0.18702	0.0095	0.17752		Minimum Optimal Solution =	3952.85		1	3972.67	99.99	0.97896	0.0095	0.96946		Minimum Optimal Solution =	3963.19
2	3962.16	99.73	0.12421	0.00948	0.11473		Mean of Optimal Solution =	3970.43		2	3970.73	99.94	4.1748	0.00972	4.16508		Mean of Optimal Solution =	3971.88
3	3953.61	99.51	0.15914	0.00981	0.14933		Median of Optimal Solution =	3970.43		3	3972.67	99.99	3.49118	0.00908	3.4821		Median of Optimal Solution =	3971.88
4	3972.5	99.99	0.13076	0.00943	0.12133		Solution Standrad Deviation =	3.461		4	3968.8	99.89	2.45413	0.00937	2.44476		Solution Standrad Deviation =	1.5343
5	3970.95	99.95	0.14575	0.00885	0.1369		Average Price =	27.44		5	3972.67	99.99	3.20508	0.00918	3.1959		Average Price =	87.395
6	3972.5	99.99	0.13853	0.00927	0.12926		Relability =	77.5		6	3973	100	1.35151	0.00931	1.3422		Relability =	93
7	3968.88	99.9	0.17865	0.00897	0.16968		Normalized Price =	35.4065		7	3971.06	99.95	1.01752	0.00973	1.00779		Normalized Price =	93.9731
8	3973	100	0.13195	0.00928	0.12267		Average Solution Quality =	99.935		8	3971.98	99.97	3.12015	0.00926	3.11089		Average Solution Quality =	99.9716
9	3973.01	100	0.23157	0.00923	0.22234		Average FDC =	-130.907		9	3972.67	99.99	2.38046	0.00876	2.3717		Average FDC =	-60.4476
10	3971.46	99.96	0.13879	0.00986	0.12893		Correlation Coefficent =	-0.69433		10	3972.67	99.99	0.84855	0.00909	0.83946		Correlation Coefficent =	-0.67071
11	3971.98	99.97	0.24008	0.00892	0.23116		Solution Robustness =	1147.2		11	3967.5	99.86	3.74849	0.00931	3.73918		Solution Robustness =	2588.76
12	3972.67	99.99	0.16093	0.00889	0.15204		Performance Rate =	0.028243		12	3972.03	99.98	0.67531	0.00917	0.66614		Performance Rate =	0.010641
13	3970.95	99.95	0.12336	0.00915	0.11421		Average Elapsed Time =	1.2894		13	3972.67	99.99	1.90674	0.00954	1.8972		Average Elapsed Time =	4.0763
14	3973	100	0.1309	0.00926	0.12164					14	3973.01	100	0.8381	0.00936	0.82874
15	3972.67	99.99	0.10559	0.00904	0.09655					15	3973	100	0.92454	0.00877	0.91577
16	3973.01	100	0.10682	0.00923	0.09759					16	3973	100	0.70632	0.00888	0.69744
17	3969.12	99.9	0.09401	0.004	0.09001					17	3972.5	99.99	2.78699	0.00918	2.77781
18	3970.73	99.94	0.12728	0.00921	0.11807					18	3972.67	99.99	3.36371	0.00949	3.35422
19	3963.95	99.77	0.12757	0.00944	0.11813					19	3970.41	99.93	3.61746	0.009	3.60846
20	3970.73	99.94	0.19396	0.00943	0.18453					20	3972.5	99.99	2.97277	0.00903	2.96374
21	3973.01	100	0.12071	0.00929	0.11142					21	3972.03	99.98	2.64574	0.00925	2.63649
22	3972.17	99.98	0.12379	0.00911	0.11468					22	3972.35	99.98	2.94446	0.00962	2.93484
23	3968.36	99.88	0.16005	0.00938	0.15067					23	3969.12	99.9	2.5414	0.00906	2.53234
24	3959.75	99.67	0.06254	0.0093	0.05324					24	3972.5	99.99	3.05419	0.00947	3.04472
25	3971.98	99.97	0.13474	0.00936	0.12538					25	3972.67	99.99	2.56998	0.00906	2.56092
26	3966.86	99.85	0.17652	0.00911	0.16741					26	3971.46	99.96	2.58578	0.00917	2.57661
27	3952.85	99.49	0.08537	0.00908	0.07629					27	3973	100	2.93621	0.00884	2.92737
28	3973	100	0.23423	0.00938	0.22485					28	3972.35	99.98	2.33553	0.00913	2.3264
29	3971.85	99.97	0.08088	0.00947	0.07141					29	3971.98	99.97	1.59026	0.00977	1.58049
30	3961.12	99.7	0.11526	0.0089	0.10636					30	3970.41	99.93	3.85637	0.00949	3.84688
31	3971.98	99.97	0.15497	0.00904	0.14593					31	3972.67	99.99	1.32328	0.00902	1.31426
32	3971.98	99.97	0.13976	0.00911	0.13065					32	3972.35	99.98	1.38363	0.00928	1.37435
33	3972.03	99.98	0.15162	0.00906	0.14256					33	3972.35	99.98	2.24239	0.00917	2.23322
34	3970.09	99.93	0.11806	0.00907	0.10899					34	3972.67	99.99	0.70493	0.0091	0.69583
35	3968.36	99.88	0.11915	0.00891	0.11024					35	3971.98	99.97	1.26222	0.00945	1.25277
36	3970.73	99.94	0.08878	0.004	0.08478					36	3971.98	99.97	2.04196	0.00947	2.03249
37	3973	100	0.12343	0.00898	0.11445					37	3968.36	99.88	2.48402	0.00883	2.47519
38	3971.06	99.95	0.16039	0.00928	0.15111					38	3972.67	99.99	3.37358	0.00946	3.36412
39	3972.35	99.98	0.08837	0.004	0.08437					39	3972.03	99.98	0.53654	0.00912	0.52742
40	3973	100	0.16953	0.00925	0.16028					40	3969.39	99.91	2.83752	0.00934	2.82818
41	3969.44	99.91	0.23395	0.00898	0.22497					41	3973	100	3.30831	0.00929	3.29902
42	3964.3	99.78	0.10073	0.00955	0.09118					42	3973	100	2.40722	0.00918	2.39804
43	3973	100	0.17323	0.00944	0.16379					43	3971.98	99.97	1.81235	0.00913	1.80322
44	3971.46	99.96	0.24328	0.00976	0.23352					44	3972.35	99.98	2.58503	0.00912	2.57591
45	3972.03	99.98	0.21095	0.00939	0.20156					45	3970.73	99.94	3.48464	0.00928	3.47536
46	3972.35	99.98	0.1311	0.004	0.1271					46	3972.35	99.98	3.14035	0.00931	3.13104
47	3973	100	0.25311	0.00927	0.24384					47	3973	100	1.70956	0.00975	1.69981
48	3970.95	99.95	0.19032	0.00934	0.18098					48	3968.88	99.9	3.07185	0.0096	3.06225
49	3973	100	0.12923	0.00882	0.12041					49	3973.01	100	3.37221	0.00929	3.36292
50	3972.67	99.99	0.13073	0.004	0.12673					50	3972.5	99.99	1.98726	0.00873	1.97853
51	3970.23	99.93	0.17883	0.00903	0.1698					51	3972.5	99.99	0.81462	0.00887	0.80575
52	3971.98	99.97	0.15975	0.00929	0.15046					52	3972.35	99.98	1.37281	0.00938	1.36343
53	3964.92	99.8	0.11843	0.00934	0.10909					53	3970.73	99.94	3.26097	0.00961	3.25136
54	3973	100	0.29018	0.00917	0.28101					54	3967.5	99.86	3.34552	0.00918	3.33634
55	3973	100	0.33844	0.0094	0.32904					55	3972.67	99.99	3.75413	0.00964	3.74449
56	3971.46	99.96	0.08876	0.00975	0.07901					56	3972.67	99.99	2.62848	0.00965	2.61883
57	3972.5	99.99	0.13193	0.00943	0.1225					57	3972.5	99.99	3.78657	0.00917	3.7774
58	3970.95	99.95	0.16439	0.00941	0.15498					58	3963.19	99.75	2.25946	0.00922	2.25024
59	3968.82	99.89	0.11079	0.00915	0.10164					59	3973.01	100	1.34427	0.00932	1.33495
60	3972.5	99.99	0.10742	0.01007	0.09735					60	3973	100	1.69401	0.00911	1.6849
61	3960.72	99.69	0.08088	0.00937	0.07151					61	3972.5	99.99	2.84202	0.00929	2.83273
62	3970.73	99.94	0.14773	0.00937	0.13836					62	3967.18	99.85	2.26976	0.0095	2.26026
63	3972.67	99.99	0.20079	0.00881	0.19198					63	3971.98	99.97	2.40341	0.004	2.39941
64	3972.67	99.99	0.18766	0.00911	0.17855					64	3972.35	99.98	3.47506	0.0091	3.46596
65	3973	100	0.39863	0.00947	0.38916					65	3973	100	2.9119	0.00917	2.90273
66	3963.77	99.77	0.10844	0.00894	0.0995					66	3969.39	99.91	1.79077	0.00896	1.78181
67	3972.17	99.98	0.11871	0.00933	0.10938					67	3965.78	99.82	3.06936	0.00931	3.06005
68	3972.35	99.98	0.15706	0.00923	0.14783					68	3972.35	99.98	3.59787	0.004	3.59387
69	3972.67	99.99	0.13129	0.00905	0.12224					69	3972.5	99.99	1.20412	0.00936	1.19476
70	3965.26	99.8	0.1157	0.00902	0.10668					70	3972.35	99.98	3.62307	0.00886	3.61421
71	3967.97	99.87	0.1518	0.00935	0.14245					71	3967.5	99.86	2.52134	0.0092	2.51214
72	3970.09	99.93	0.0906	0.00894	0.08166					72	3972.35	99.98	2.86805	0.00884	2.85921
73	3973	100	0.13605	0.00938	0.12667					73	3972.67	99.99	2.50782	0.00869	2.49913
74	3962.98	99.75	0.09883	0.00899	0.08984					74	3972.67	99.99	3.61943	0.00901	3.61042
75	3970.73	99.94	0.23029	0.00974	0.22055					75	3971.98	99.97	3.61634	0.00911	3.60723
76	3973.01	100	0.11048	0.00925	0.10123					76	3972.67	99.99	1.63806	0.00952	1.62854
77	3967.33	99.86	0.13495	0.00941	0.12554					77	3970.73	99.94	2.64626	0.0091	2.63716
78	3972.35	99.98	0.26045	0.00924	0.25121					78	3972.5	99.99	3.03691	0.00892	3.02799
79	3972.67	99.99	0.12801	0.00979	0.11822					79	3972.5	99.99	3.49567	0.00928	3.48639
80	3973	100	0.12246	0.00929	0.11317					80	3973.01	100	0.65338	0.00946	0.64392
81	3971.98	99.97	0.10163	0.0091	0.09253					81	3972.67	99.99	1.58284	0.0093	1.57354
82	3972.67	99.99	0.101	0.004	0.097					82	3972.5	99.99	1.40159	0.00931	1.39228
83	3971.85	99.97	0.13161	0.00942	0.12219					83	3971.06	99.95	3.29381	0.0089	3.28491
84	3965.56	99.81	0.24155	0.00884	0.23271					84	3972.5	99.99	1.75081	0.00961	1.7412
85	3972.35	99.98	0.2984	0.00976	0.28864					85	3973.01	100	0.69852	0.00915	0.68937
86	3972.67	99.99	0.12674	0.00944	0.1173					86	3972.35	99.98	2.09904	0.00927	2.08977
87	3970.43	99.94	0.15309	0.00894	0.14415					87	3972.35	99.98	3.64386	0.00925	3.63461
88	3972.35	99.98	0.22776	0.00931	0.21845					88	3973.01	100	3.26464	0.00956	3.25508
89	3962.16	99.73	0.13015	0.00946	0.12069					89	3969.12	99.9	2.50363	0.00918	2.49445
90	3966.86	99.85	0.13634	0.00922	0.12712					90	3972.35	99.98	2.64277	0.0094	2.63337
91	3972.67	99.99	0.19231	0.00938	0.18293					91	3972.67	99.99	2.72147	0.00909	2.71238
92	3971.85	99.97	0.08051	0.00972	0.07079					92	3972.35	99.98	1.74939	0.00864	1.74075
93	3970.41	99.93	0.12656	0.00916	0.1174					93	3972.5	99.99	3.36431	0.00968	3.35463
94	3967.53	99.86	0.14876	0.00913	0.13963					94	3973.01	100	2.75057	0.0092	2.74137
95	3969.91	99.92	0.09755	0.00933	0.08822					95	3970.73	99.94	1.26683	0.00942	1.25741
96	3971.98	99.97	0.19148	0.0091	0.18238					96	3970.09	99.93	3.24346	0.00936	3.2341
97	3968.88	99.9	0.10316	0.00892	0.09424					97	3972.67	99.99	1.92651	0.00914	1.91737
98	3972.49	99.99	0.17307	0.00913	0.16394					98	3971.98	99.97	2.50348	0.00941	2.49407
99	3972.67	99.99	0.13369	0.00939	0.1243					99	3973.01	100	3.53026	0.00917	3.52109
100	3972.67	99.99	0.22277	0.00937	0.2134					100	3972.67	99.99	2.71197	0.00942	2.70255
101	3971.85	99.97	0.17364	0.00917	0.16447					101	3969.44	99.91	3.84585	0.00964	3.83621
102	3971.98	99.97	0.13098	0.00943	0.12155					102	3971.46	99.96	0.79059	0.00917	0.78142
103	3969.91	99.92	0.24521	0.00917	0.23604					103	3972.67	99.99	2.3431	0.00924	2.33386
104	3973.01	100	0.10653	0.00905	0.09748					104	3972.35	99.98	2.1783	0.00913	2.16917
105	3972.67	99.99	0.25408	0.0095	0.24458					105	3973	100	2.43666	0.00919	2.42747
106	3970.09	99.93	0.10668	0.00959	0.09709					106	3971.06	99.95	2.19361	0.00921	2.1844
107	3973	100	0.1233	0.00923	0.11407					107	3972.03	99.98	2.96182	0.0091	2.95272
108	3970.09	99.93	0.11584	0.0096	0.10624					108	3973	100	2.89038	0.00942	2.88096
109	3973	100	0.16819	0.00988	0.15831					109	3972.67	99.99	3.18122	0.00974	3.17148
110	3972.35	99.98	0.18505	0.00913	0.17592					110	3972.35	99.98	2.20059	0.0092	2.19139
111	3963.71	99.77	0.13502	0.00932	0.1257					111	3972.35	99.98	2.56459	0.00918	2.55541
112	3972.03	99.98	0.14744	0.00908	0.13836					112	3972.67	99.99	3.93569	0.00904	3.92665
113	3971.06	99.95	0.10643	0.0094	0.09703					113	3971.98	99.97	3.06023	0.004	3.05623
114	3971.98	99.97	0.26721	0.00896	0.25825					114	3970.41	99.93	2.87085	0.0097	2.86115
115	3970.41	99.93	0.21065	0.00913	0.20152					115	3972.35	99.98	2.9436	0.00996	2.93364
116	3972.67	99.99	0.1193	0.00888	0.11042					116	3973	100	1.92096	0.00941	1.91155
117	3971.46	99.96	0.22832	0.00941	0.21891					117	3972.35	99.98	2.89522	0.00942	2.8858
118	3972.5	99.99	0.23048	0.00959	0.22089					118	3967.18	99.85	3.12702	0.0097	3.11732
119	3969.12	99.9	0.13451	0.00918	0.12533					119	3971.46	99.96	1.96728	0.00921	1.95807
120	3969.26	99.91	0.13235	0.00927	0.12308					120	3970.09	99.93	2.5192	0.0094	2.5098
121	3972.35	99.98	0.18393	0.00896	0.17497					121	3971.98	99.97	1.54178	0.0096	1.53218
122	3972.67	99.99	0.14509	0.00892	0.13617					122	3972.35	99.98	2.82962	0.00895	2.82067
123	3970.95	99.95	0.11814	0.0096	0.10854					123	3969.39	99.91	3.73823	0.00906	3.72917
124	3972.5	99.99	0.11634	0.00913	0.10721					124	3970.41	99.93	3.94827	0.00933	3.93894
125	3971.98	99.97	0.15824	0.00965	0.14859					125	3971.98	99.97	1.91796	0.00924	1.90872
126	3971.06	99.95	0.15339	0.00955	0.14384					126	3972.35	99.98	1.42042	0.00904	1.41138
127	3962.98	99.75	0.11557	0.00889	0.10668					127	3971.06	99.95	2.0968	0.00929	2.08751
128	3968.88	99.9	0.19007	0.00931	0.18076					128	3973.01	100	2.52695	0.00923	2.51772
129	3972.5	99.99	0.18524	0.00893	0.17631					129	3971.06	99.95	2.84016	0.00918	2.83098
130	3970.73	99.94	0.18495	0.00955	0.1754					130	3973	100	1.361	0.00906	1.35194
131	3968.36	99.88	0.09229	0.00932	0.08297					131	3973.01	100	0.94341	0.00929	0.93412
132	3972.35	99.98	0.08894	0.00962	0.07932					132	3973	100	3.12614	0.00913	3.11701
133	3968.36	99.88	0.146	0.00909	0.13691					133	3969.39	99.91	3.33002	0.00945	3.32057
134	3969.44	99.91	0.15262	0.00914	0.14348					134	3972.67	99.99	2.55891	0.00917	2.54974
135	3966.03	99.82	0.09862	0.00926	0.08936					135	3970.73	99.94	3.79757	0.00906	3.78851
136	3972.67	99.99	0.14091	0.00919	0.13172					136	3972.35	99.98	3.53548	0.00903	3.52645
137	3973.01	100	0.26012	0.00913	0.25099					137	3972.5	99.99	2.96732	0.00918	2.95814
138	3972.67	99.99	0.12762	0.00954	0.11808					138	3973.01	100	2.95062	0.00901	2.94161
139	3968.88	99.9	0.22561	0.00926	0.21635					139	3973	100	1.70266	0.00926	1.6934
140	3969.39	99.91	0.11825	0.00896	0.10929					140	3972.35	99.98	1.25302	0.00924	1.24378
141	3963.19	99.75	0.12352	0.00926	0.11426					141	3972.67	99.99	0.97818	0.00952	0.96866
142	3973	100	0.28319	0.00884	0.27435					142	3971.46	99.96	1.29358	0.00955	1.28403
143	3971.46	99.96	0.1222	0.00921	0.11299					143	3971.98	99.97	1.34108	0.00932	1.33176
144	3968.82	99.89	0.06738	0.00912	0.05826					144	3972.35	99.98	2.89529	0.00938	2.88591
145	3972.67	99.99	0.19981	0.00937	0.19044					145	3971.98	99.97	2.62049	0.00955	2.61094
146	3972.67	99.99	0.13251	0.00877	0.12374					146	3973.01	100	3.34653	0.00953	3.337
147	3972.35	99.98	0.16542	0.00912	0.1563					147	3972.5	99.99	2.61762	0.00938	2.60824
148	3972.35	99.98	0.16959	0.00921	0.16038					148	3972.5	99.99	3.60036	0.00927	3.59109
149	3970.95	99.95	0.07484	0.00912	0.06572					149	3973	100	3.38416	0.00937	3.37479
150	3969.76	99.92	0.0896	0.00925	0.08035					150	3973	100	0.66876	0.00892	0.65984
151	3966.86	99.85	0.12971	0.00936	0.12035					151	3971.46	99.96	2.97269	0.00902	2.96367
152	3972.35	99.98	0.11981	0.009	0.11081					152	3972.5	99.99	3.5573	0.00897	3.54833
153	3967.84	99.87	0.23824	0.00918	0.22906					153	3972.35	99.98	0.964	0.00886	0.95514
154	3971.98	99.97	0.12197	0.00915	0.11282					154	3968.88	99.9	2.66486	0.00955	2.65531
155	3971.46	99.96	0.12811	0.00942	0.11869					155	3971.98	99.97	3.26728	0.00935	3.25793
156	3971.98	99.97	0.15604	0.00948	0.14656					156	3973	100	3.66322	0.00912	3.6541
157	3972.35	99.98	0.21	0.00906	0.20094					157	3972.5	99.99	2.70998	0.00905	2.70093
158	3973.01	100	0.11402	0.00957	0.10445					158	3973.01	100	2.18338	0.00933	2.17405
159	3968.88	99.9	0.11487	0.0096	0.10527					159	3972.67	99.99	2.59047	0.00961	2.58086
160	3958.57	99.64	0.07161	0.00879	0.06282					160	3973	100	2.75752	0.009	2.74852
161	3970.41	99.93	0.08855	0.00952	0.07903					161	3972.5	99.99	2.89247	0.00946	2.88301
162	3972.67	99.99	0.18695	0.00921	0.17774					162	3972.67	99.99	2.31552	0.00965	2.30587
163	3972.35	99.98	0.1952	0.00961	0.18559					163	3973	100	2.86795	0.00897	2.85898
164	3972.35	99.98	0.15853	0.00913	0.1494					164	3973	100	1.35042	0.00939	1.34103
165	3968.36	99.88	0.0762	0.00948	0.06672					165	3972.35	99.98	1.71691	0.00937	1.70754
166	3970.41	99.93	0.14512	0.00944	0.13568					166	3973.01	100	2.44485	0.009	2.43585
167	3972.03	99.98	0.13222	0.00918	0.12304					167	3973	100	1.23972	0.00966	1.23006
168	3966.53	99.84	0.0818	0.0096	0.0722					168	3972.67	99.99	1.97906	0.00949	1.96957
169	3966.86	99.85	0.13814	0.0094	0.12874					169	3972.5	99.99	2.27096	0.00918	2.26178
170	3972.67	99.99	0.21785	0.00922	0.20863					170	3972.67	99.99	3.13409	0.0092	3.12489
171	3973	100	0.09794	0.00911	0.08883					171	3969.12	99.9	3.67931	0.00902	3.67029
172	3972.5	99.99	0.22284	0.00942	0.21342					172	3972.67	99.99	2.67816	0.0088	2.66936
173	3958.57	99.64	0.09364	0.00927	0.08437					173	3972.35	99.98	3.00298	0.00949	2.99349
174	3971.06	99.95	0.19524	0.00939	0.18585					174	3967.5	99.86	3.26423	0.00921	3.25502
175	3972.67	99.99	0.12029	0.00956	0.11073					175	3972.67	99.99	3.45765	0.00941	3.44824
176	3972.03	99.98	0.08547	0.0092	0.07627					176	3973.01	100	3.03081	0.00929	3.02152
177	3972.35	99.98	0.09243	0.00932	0.08311					177	3972.35	99.98	2.43872	0.00934	2.42938
178	3968.8	99.89	0.11805	0.00923	0.10882					178	3972.35	99.98	3.15264	0.00893	3.14371
179	3972.5	99.99	0.242	0.00928	0.23272					179	3970.73	99.94	3.436	0.0093	3.4267
180	3972.03	99.98	0.11461	0.004	0.11061					180	3971.98	99.97	2.81618	0.00925	2.80693
181	3968.61	99.89	0.23353	0.00975	0.22378					181	3968.88	99.9	3.00855	0.00927	2.99928
182	3972.35	99.98	0.25612	0.00916	0.24696					182	3972.5	99.99	2.89299	0.00925	2.88374
183	3972.03	99.98	0.15283	0.00914	0.14369					183	3973	100	2.84636	0.00894	2.83742
184	3972.35	99.98	0.23132	0.00892	0.2224					184	3973	100	3.30845	0.00904	3.29941
185	3968.8	99.89	0.08461	0.0092	0.07541					185	3973.01	100	0.8023	0.00944	0.79286
186	3968.88	99.9	0.11119	0.00948	0.10171					186	3972.5	99.99	3.01451	0.00926	3.00525
187	3970.73	99.94	0.1721	0.00924	0.16286					187	3972.67	99.99	1.60269	0.00987	1.59282
188	3970.41	99.93	0.12721	0.00937	0.11784					188	3972.03	99.98	2.37462	0.00911	2.36551
189	3972.35	99.98	0.14336	0.00894	0.13442					189	3972.5	99.99	0.82708	0.00934	0.81774
190	3972.67	99.99	0.23258	0.00893	0.22365					190	3972.35	99.98	2.56158	0.00896	2.55262
191	3972.5	99.99	0.19344	0.00943	0.18401					191	3973.01	100	0.76551	0.00882	0.75669
192	3971.98	99.97	0.21757	0.00953	0.20804					192	3968.88	99.9	1.89632	0.00925	1.88707
193	3971.52	99.96	0.1737	0.00939	0.16431					193	3972.67	99.99	3.41722	0.00919	3.40803
194	3971.7	99.97	0.09371	0.00901	0.0847					194	3970.09	99.93	2.91084	0.00902	2.90182
195	3972.5	99.99	0.17507	0.00927	0.1658					195	3972.67	99.99	1.88399	0.00928	1.87471
196	3970.41	99.93	0.14773	0.00947	0.13826					196	3972.35	99.98	2.92616	0.00893	2.91723
197	3972.35	99.98	0.23155	0.00926	0.22229					197	3973	100	2.34292	0.004	2.33892
198	3973.01	100	0.13486	0.00917	0.12569					198	3972.5	99.99	2.68001	0.00888	2.67113
199	3972.67	99.99	0.23184	0.00898	0.22286					199	3971.46	99.96	3.0387	0.0091	3.0296
200	3970.09	99.93	0.10934	0.00927	0.10007					200	3972.67	99.99	1.12745	0.00891	1.11854

## Sheet: 05_HCFACO_Seeds(111)
Fast Converegnce Exp							Fast Converegnce Exp			Slow Converegnce Exp							Slow Converegnce Exp
#	CBLF	Quality	Taumax	Taumin	DeltaTauminmax		Global Optimal Solution =	3973.01		#	CBLF	Quality	Taumax	Taumin	DeltaTauminmax		Global Optimal Solution =	3973.01
1	3972.35	99.98	0.16294	0.00953	0.15341		Minimum Optimal Solution=	3929.05		1	3972.35	99.98	2.5671	0.00953	2.55757		Minimum Optimal Solution =	3963.62
2	3972.5	99.99	0.19365	0.00899	0.18466		Mean of Optimal Solution =	3970.07		2	3971.98	99.97	3.05065	0.00963	3.04102		Mean of Optimal Solution =	3972.03
3	3970.73	99.94	0.11393	0.00959	0.10434		Median of Optimal Solution =	3970.07		3	3972.67	99.99	3.47499	0.00961	3.46538		Median of Optimal Solution =	3972.03
4	3971.46	99.96	0.1825	0.00944	0.17306		Solution Standrad Deviation=	4.7346		4	3968.36	99.88	3.35368	0.00914	3.34454		Solution Standrad Deviation =	1.4598
5	3973.01	100	0.13582	0.00923	0.12659		Average Price =	27.89		5	3973	100	3.648	0.00907	3.63893		Average Price =	88.42
6	3971.46	99.96	0.1558	0.00958	0.14622		Relability =	75		6	3973	100	3.58988	0.00901	3.58087		Relability =	93.5
7	3972.17	99.98	0.08517	0.00954	0.07563		Normalized Price =	37.1867		7	3972.67	99.99	1.62958	0.00974	1.61984		Normalized Price =	94.5668
8	3971.98	99.97	0.20395	0.00898	0.19497		Average Solution Quality =	99.9261		8	3971.98	99.97	3.13295	0.0093	3.12365		Average Solution Quality =	99.9754
9	3971.46	99.96	0.16381	0.00906	0.15475		Average FDC =	-125.309		9	3972.35	99.98	2.98747	0.00916	2.97831		Average FDC =	-59.9567
10	3971.98	99.97	0.13531	0.0095	0.12581		Correlation Coefficent =	-0.66704		10	3972.67	99.99	3.58202	0.004	3.57802		Correlation Coefficent =	-0.68345
11	3973.01	100	0.17704	0.00929	0.16775		Solution Robustness =	838.523		11	3972.67	99.99	2.6833	0.00906	2.67424		Solution Robustness =	2721
12	3972.35	99.98	0.1194	0.0094	0.11		Performance Rate =	0.026891		12	3970.41	99.93	2.70307	0.004	2.69907		Performance Rate =	0.010575
13	3972.5	99.99	0.14369	0.00917	0.13452		Average Elapsed Time =	1.3109		13	3971.98	99.97	3.6176	0.00957	3.60803		Average Elapsed Time =	4.1022
14	3972.5	99.99	0.10327	0.00963	0.09364					14	3972.35	99.98	2.35712	0.00883	2.34829
15	3970.41	99.93	0.13586	0.00899	0.12687					15	3973.01	100	2.28826	0.0096	2.27866
16	3972.03	99.98	0.1101	0.00906	0.10104					16	3973	100	0.96981	0.00918	0.96063
17	3970.73	99.94	0.08988	0.00952	0.08036					17	3973.01	100	1.65169	0.00907	1.64262
18	3972.5	99.99	0.18622	0.00927	0.17695					18	3972.5	99.99	1.03203	0.00941	1.02262
19	3971.46	99.96	0.18082	0.00959	0.17123					19	3968.88	99.9	1.51541	0.00938	1.50603
20	3968.5	99.89	0.09053	0.00913	0.0814					20	3973	100	2.64902	0.0088	2.64022
21	3969.39	99.91	0.10739	0.00885	0.09854					21	3972.5	99.99	3.68681	0.00938	3.67743
22	3972.17	99.98	0.10749	0.00952	0.09797					22	3973	100	0.76026	0.00905	0.75121
23	3972.03	99.98	0.14618	0.00956	0.13662					23	3972.67	99.99	0.63306	0.00922	0.62384
24	3969.44	99.91	0.1225	0.00941	0.11309					24	3973	100	2.42866	0.0091	2.41956
25	3973.01	100	0.21896	0.00904	0.20992					25	3972.67	99.99	2.94669	0.00923	2.93746
26	3966.86	99.85	0.12271	0.00967	0.11304					26	3972.5	99.99	3.84349	0.00935	3.83414
27	3972.67	99.99	0.18107	0.00875	0.17232					27	3971.46	99.96	2.82026	0.00888	2.81138
28	3973.01	100	0.11756	0.00921	0.10835					28	3973.01	100	2.838	0.00878	2.82922
29	3960.72	99.69	0.10171	0.00954	0.09217					29	3970.41	99.93	1.99229	0.00955	1.98274
30	3968.88	99.9	0.1015	0.00925	0.09225					30	3972.67	99.99	2.06172	0.00935	2.05237
31	3962.16	99.73	0.11039	0.00935	0.10104					31	3972.5	99.99	0.76461	0.00938	0.75523
32	3971.38	99.96	0.13167	0.00935	0.12232					32	3972.5	99.99	3.89803	0.00947	3.88856
33	3972.5	99.99	0.17541	0.004	0.17141					33	3973	100	1.74602	0.00889	1.73713
34	3972.5	99.99	0.16474	0.00944	0.1553					34	3970.41	99.93	4.02495	0.00911	4.01584
35	3970.95	99.95	0.16029	0.00918	0.15111					35	3973.01	100	3.33463	0.00927	3.32536
36	3964.41	99.78	0.12794	0.0094	0.11854					36	3973	100	3.14654	0.00935	3.13719
37	3972.67	99.99	0.13003	0.0094	0.12063					37	3971.98	99.97	2.54137	0.00905	2.53232
38	3972.35	99.98	0.22737	0.00946	0.21791					38	3972.35	99.98	2.78742	0.00901	2.77841
39	3966.53	99.84	0.14974	0.00922	0.14052					39	3972.35	99.98	3.17578	0.00905	3.16673
40	3970.41	99.93	0.24474	0.00885	0.23589					40	3972.67	99.99	3.11174	0.00958	3.10216
41	3971.06	99.95	0.19029	0.00937	0.18092					41	3972.35	99.98	3.40518	0.0093	3.39588
42	3972.67	99.99	0.12596	0.00927	0.11669					42	3971.46	99.96	1.23608	0.0093	1.22678
43	3972.67	99.99	0.18651	0.00936	0.17715					43	3972.67	99.99	1.7904	0.00896	1.78144
44	3972.67	99.99	0.10793	0.00942	0.09851					44	3973	100	2.59541	0.00915	2.58626
45	3969.26	99.91	0.10651	0.00956	0.09695					45	3972.03	99.98	0.82268	0.00879	0.81389
46	3972.67	99.99	0.20408	0.00955	0.19453					46	3972.67	99.99	0.90275	0.00927	0.89348
47	3972.35	99.98	0.16124	0.00909	0.15215					47	3972.67	99.99	2.91944	0.00926	2.91018
48	3970.41	99.93	0.19217	0.004	0.18817					48	3973.01	100	3.38347	0.00907	3.3744
49	3972.5	99.99	0.18304	0.00957	0.17347					49	3970.41	99.93	2.48123	0.00904	2.47219
50	3967.18	99.85	0.20022	0.00922	0.191					50	3972.35	99.98	3.45262	0.00922	3.4434
51	3972.03	99.98	0.28905	0.0092	0.27985					51	3972.67	99.99	1.18698	0.00889	1.17809
52	3967.18	99.85	0.1271	0.00931	0.11779					52	3973	100	3.13869	0.00926	3.12943
53	3970.41	99.93	0.16756	0.00948	0.15808					53	3973.01	100	2.16147	0.00896	2.15251
54	3972.5	99.99	0.11779	0.00952	0.10827					54	3972.67	99.99	2.81759	0.0089	2.80869
55	3971.52	99.96	0.14714	0.00937	0.13777					55	3972.67	99.99	2.97768	0.00943	2.96825
56	3970.09	99.93	0.15259	0.00908	0.14351					56	3973.01	100	4.25238	0.0094	4.24298
57	3972.35	99.98	0.20108	0.00996	0.19112					57	3973.01	100	0.73745	0.00922	0.72823
58	3967.18	99.85	0.0926	0.0088	0.0838					58	3969.12	99.9	2.68466	0.00924	2.67542
59	3964.27	99.78	0.12264	0.00897	0.11367					59	3972.35	99.98	1.83914	0.00913	1.83001
60	3973	100	0.19096	0.00941	0.18155					60	3972.67	99.99	1.67506	0.00928	1.66578
61	3972.03	99.98	0.13288	0.00897	0.12391					61	3971.06	99.95	4.21287	0.004	4.20887
62	3960.72	99.69	0.11579	0.0089	0.10689					62	3971.98	99.97	3.28849	0.00927	3.27922
63	3962.67	99.74	0.10483	0.00916	0.09567					63	3972.5	99.99	2.91229	0.00974	2.90255
64	3968.15	99.88	0.12452	0.0093	0.11522					64	3972.5	99.99	3.43684	0.00928	3.42756
65	3972.5	99.99	0.18312	0.00934	0.17378					65	3973.01	100	1.73475	0.00919	1.72556
66	3968.5	99.89	0.10184	0.00896	0.09288					66	3972.35	99.98	1.94754	0.00916	1.93838
67	3973	100	0.13595	0.00878	0.12717					67	3973	100	0.78113	0.00917	0.77196
68	3972.5	99.99	0.20594	0.00961	0.19633					68	3972.67	99.99	3.62616	0.00907	3.61709
69	3972.67	99.99	0.12183	0.00955	0.11228					69	3972.67	99.99	3.57905	0.00913	3.56992
70	3968.47	99.89	0.26144	0.00943	0.25201					70	3968.8	99.89	2.18118	0.00973	2.17145
71	3972.03	99.98	0.20597	0.00919	0.19678					71	3972.67	99.99	1.8814	0.00893	1.87247
72	3973	100	0.13964	0.00903	0.13061					72	3973	100	1.43101	0.00925	1.42176
73	3972.67	99.99	0.19317	0.00894	0.18423					73	3972.5	99.99	2.55573	0.00909	2.54664
74	3962.16	99.73	0.10622	0.00934	0.09688					74	3972.35	99.98	2.88294	0.00902	2.87392
75	3972.67	99.99	0.20065	0.00932	0.19133					75	3972.35	99.98	1.47183	0.004	1.46783
76	3967.18	99.85	0.14075	0.0089	0.13185					76	3972.35	99.98	0.86325	0.0096	0.85365
77	3972.35	99.98	0.08511	0.00931	0.0758					77	3973	100	0.98334	0.00925	0.97409
78	3973	100	0.23079	0.00885	0.22194					78	3972.03	99.98	0.47691	0.00949	0.46742
79	3973	100	0.10304	0.00902	0.09402					79	3973	100	1.98792	0.00938	1.97854
80	3971.46	99.96	0.18032	0.00887	0.17145					80	3972.5	99.99	1.11369	0.0089	1.10479
81	3972.67	99.99	0.24993	0.00935	0.24058					81	3972.03	99.98	3.55396	0.00958	3.54438
82	3972.03	99.98	0.23643	0.00904	0.22739					82	3972.35	99.98	2.37261	0.00919	2.36342
83	3972.5	99.99	0.12315	0.00904	0.11411					83	3972.67	99.99	2.25948	0.00906	2.25042
84	3968.5	99.89	0.12056	0.00941	0.11115					84	3972.35	99.98	1.82222	0.00916	1.81306
85	3972.5	99.99	0.19423	0.00938	0.18485					85	3972.67	99.99	1.84267	0.00883	1.83384
86	3967.84	99.87	0.14965	0.00978	0.13987					86	3972.5	99.99	2.05585	0.00901	2.04684
87	3959.42	99.66	0.11729	0.00938	0.10791					87	3972.67	99.99	2.17459	0.00876	2.16583
88	3971.46	99.96	0.4417	0.00875	0.43295					88	3970.41	99.93	3.02693	0.00891	3.01802
89	3972.67	99.99	0.17147	0.00959	0.16188					89	3969.39	99.91	2.67887	0.00911	2.66976
90	3968.36	99.88	0.15244	0.00997	0.14247					90	3972.67	99.99	3.49393	0.004	3.48993
91	3970.95	99.95	0.17722	0.00938	0.16784					91	3972.67	99.99	2.19093	0.00913	2.1818
92	3952.33	99.48	0.07279	0.00921	0.06358					92	3971.46	99.96	0.88614	0.00974	0.8764
93	3968.82	99.89	0.13843	0.00938	0.12905					93	3973.01	100	3.07665	0.00918	3.06747
94	3973.01	100	0.16372	0.00918	0.15454					94	3969.39	99.91	2.8224	0.00927	2.81313
95	3970.73	99.94	0.1324	0.00907	0.12333					95	3970.43	99.94	0.74606	0.00924	0.73682
96	3973	100	0.13496	0.00908	0.12588					96	3972.67	99.99	0.54036	0.00959	0.53077
97	3972.35	99.98	0.18095	0.00924	0.17171					97	3972.67	99.99	3.76405	0.00903	3.75502
98	3972.5	99.99	0.15622	0.00941	0.14681					98	3973	100	3.85873	0.00932	3.84941
99	3973.01	100	0.13937	0.00929	0.13008					99	3971.06	99.95	2.56719	0.00897	2.55822
100	3968.8	99.89	0.13084	0.00912	0.12172					100	3972.35	99.98	1.52531	0.0092	1.51611
101	3972.35	99.98	0.15996	0.00947	0.15049					101	3973.01	100	0.58042	0.00902	0.5714
102	3972.67	99.99	0.18589	0.00945	0.17644					102	3969.12	99.9	2.04629	0.00876	2.03753
103	3973.01	100	0.16321	0.00927	0.15394					103	3973	100	3.54009	0.00971	3.53038
104	3961.07	99.7	0.11102	0.00944	0.10158					104	3972.35	99.98	3.72176	0.00956	3.7122
105	3972.67	99.99	0.18386	0.00895	0.17491					105	3973.01	100	2.23	0.00928	2.22072
106	3973	100	0.09584	0.00966	0.08618					106	3972.67	99.99	1.46388	0.00974	1.45414
107	3973.01	100	0.11895	0.00935	0.1096					107	3972.67	99.99	1.53664	0.004	1.53264
108	3968.8	99.89	0.1384	0.00948	0.12892					108	3973	100	3.9675	0.00973	3.95777
109	3971.85	99.97	0.22116	0.00936	0.2118					109	3968.88	99.9	2.54636	0.0093	2.53706
110	3970.43	99.94	0.08515	0.00922	0.07593					110	3972.35	99.98	3.9534	0.00907	3.94433
111	3973	100	0.1517	0.00914	0.14256					111	3972.03	99.98	3.10159	0.00912	3.09247
112	3971.46	99.96	0.23399	0.00895	0.22504					112	3972.67	99.99	3.19633	0.00974	3.18659
113	3968.82	99.89	0.13974	0.00927	0.13047					113	3972.67	99.99	2.90029	0.0092	2.89109
114	3972.67	99.99	0.13658	0.00915	0.12743					114	3973	100	3.09711	0.00913	3.08798
115	3972.35	99.98	0.13178	0.00906	0.12272					115	3972.5	99.99	2.83347	0.00939	2.82408
116	3970.41	99.93	0.08419	0.00918	0.07501					116	3973	100	0.92033	0.00888	0.91145
117	3968.36	99.88	0.08115	0.00943	0.07172					117	3972.5	99.99	2.98572	0.00914	2.97658
118	3929.05	98.89	0.24282	0.00954	0.23328					118	3967.5	99.86	3.69751	0.00906	3.68845
119	3973	100	0.09864	0.00934	0.0893					119	3965.24	99.8	3.1056	0.00919	3.09641
120	3955.22	99.55	0.11011	0.00966	0.10045					120	3973	100	3.16431	0.00934	3.15497
121	3973	100	0.12385	0.00932	0.11453					121	3972.35	99.98	3.31806	0.00898	3.30908
122	3972.35	99.98	0.15814	0.0091	0.14904					122	3968.88	99.9	2.80976	0.0091	2.80066
123	3971.46	99.96	0.1443	0.00914	0.13516					123	3972.5	99.99	1.02162	0.00964	1.01198
124	3967.97	99.87	0.12826	0.00915	0.11911					124	3973.01	100	3.20611	0.00929	3.19682
125	3971.98	99.97	0.17735	0.009	0.16835					125	3972.67	99.99	0.89369	0.00908	0.88461
126	3970.41	99.93	0.11857	0.00897	0.1096					126	3972.5	99.99	2.6229	0.00937	2.61353
127	3967.33	99.86	0.11092	0.0091	0.10182					127	3972.67	99.99	3.43928	0.00905	3.43023
128	3962.45	99.73	0.08139	0.00888	0.07251					128	3973	100	2.44745	0.00892	2.43853
129	3971.98	99.97	0.11571	0.00924	0.10647					129	3968.88	99.9	3.81442	0.0089	3.80552
130	3965.56	99.81	0.13652	0.00917	0.12735					130	3973.01	100	2.95101	0.00892	2.94209
131	3972.5	99.99	0.10627	0.00911	0.09716					131	3973.01	100	2.14764	0.00943	2.13821
132	3968.47	99.89	0.06819	0.004	0.06419					132	3971.98	99.97	3.90587	0.00962	3.89625
133	3972.67	99.99	0.2185	0.00926	0.20924					133	3972.35	99.98	3.07353	0.00897	3.06456
134	3968.8	99.89	0.11833	0.00917	0.10916					134	3972.67	99.99	1.65618	0.0095	1.64668
135	3970.41	99.93	0.14083	0.00922	0.13161					135	3972.5	99.99	2.28036	0.00893	2.27143
136	3965.24	99.8	0.07644	0.00919	0.06725					136	3972.5	99.99	3.14934	0.00913	3.14021
137	3973	100	0.15282	0.0097	0.14312					137	3972.35	99.98	2.48407	0.00934	2.47473
138	3972.5	99.99	0.16098	0.00918	0.1518					138	3972.5	99.99	1.94537	0.00861	1.93676
139	3969.12	99.9	0.15249	0.00929	0.1432					139	3973	100	3.22344	0.00883	3.21461
140	3973	100	0.21608	0.00898	0.2071					140	3971.98	99.97	3.02788	0.004	3.02388
141	3972.67	99.99	0.15805	0.00902	0.14903					141	3972.35	99.98	3.1131	0.00984	3.10326
142	3973.01	100	0.21985	0.00932	0.21053					142	3973.01	100	3.06548	0.00959	3.05589
143	3962.67	99.74	0.11524	0.00932	0.10592					143	3972.35	99.98	4.11563	0.00908	4.10655
144	3961.36	99.71	0.06838	0.0089	0.05948					144	3967.18	99.85	2.02762	0.00944	2.01818
145	3967.84	99.87	0.10751	0.00946	0.09805					145	3970.73	99.94	3.55805	0.00944	3.54861
146	3972.5	99.99	0.1709	0.00922	0.16168					146	3971.98	99.97	1.74703	0.00858	1.73845
147	3972.03	99.98	0.25366	0.00952	0.24414					147	3969.44	99.91	3.93441	0.00966	3.92475
148	3973.01	100	0.39179	0.00945	0.38234					148	3973.01	100	2.8725	0.00899	2.86351
149	3970.41	99.93	0.18941	0.00893	0.18048					149	3972.5	99.99	1.93089	0.00903	1.92186
150	3970.09	99.93	0.10759	0.00921	0.09838					150	3970.41	99.93	3.66622	0.00932	3.6569
151	3973.01	100	0.35577	0.00934	0.34643					151	3972.03	99.98	3.30635	0.00937	3.29698
152	3972.5	99.99	0.23331	0.00933	0.22398					152	3973	100	2.57672	0.00877	2.56795
153	3970.73	99.94	0.13898	0.00941	0.12957					153	3972.67	99.99	0.7561	0.00897	0.74713
154	3970.09	99.93	0.11506	0.00909	0.10597					154	3972.5	99.99	3.20291	0.00867	3.19424
155	3969.12	99.9	0.17775	0.00919	0.16856					155	3972.67	99.99	2.82112	0.00892	2.8122
156	3968.36	99.88	0.13589	0.00936	0.12653					156	3972.67	99.99	1.91453	0.00866	1.90587
157	3972.5	99.99	0.16423	0.009	0.15523					157	3971.98	99.97	2.05663	0.00887	2.04776
158	3970.41	99.93	0.10566	0.00966	0.096					158	3966.29	99.83	2.15545	0.00906	2.14639
159	3972.67	99.99	0.12966	0.00969	0.11997					159	3972.35	99.98	2.14711	0.00916	2.13795
160	3971.98	99.97	0.09387	0.0091	0.08477					160	3972.67	99.99	2.10333	0.00926	2.09407
161	3972.35	99.98	0.13934	0.00909	0.13025					161	3963.62	99.76	2.64812	0.00938	2.63874
162	3969.44	99.91	0.18601	0.00959	0.17642					162	3972.5	99.99	1.2805	0.0096	1.2709
163	3972.5	99.99	0.35465	0.00958	0.34507					163	3973	100	0.99813	0.00932	0.98881
164	3970.09	99.93	0.10185	0.004	0.09785					164	3972.5	99.99	1.02212	0.0096	1.01252
165	3970.09	99.93	0.14421	0.00903	0.13518					165	3968.88	99.9	3.19011	0.00875	3.18136
166	3967.5	99.86	0.11053	0.00935	0.10118					166	3971.46	99.96	3.23914	0.00932	3.22982
167	3972.67	99.99	0.09808	0.00936	0.08872					167	3973.01	100	2.50172	0.00917	2.49255
168	3971.98	99.97	0.08454	0.00931	0.07523					168	3972.67	99.99	2.88045	0.00885	2.8716
169	3968.82	99.89	0.13005	0.00927	0.12078					169	3970.41	99.93	3.96113	0.00906	3.95207
170	3971.7	99.97	0.14324	0.00877	0.13447					170	3972.67	99.99	2.31959	0.00914	2.31045
171	3970.95	99.95	0.19366	0.0095	0.18416					171	3971.46	99.96	2.77774	0.00942	2.76832
172	3970.73	99.94	0.06778	0.00924	0.05854					172	3972.35	99.98	2.4534	0.0096	2.4438
173	3949.32	99.4	0.07307	0.00922	0.06385					173	3971.98	99.97	1.42938	0.00931	1.42007
174	3972.67	99.99	0.22418	0.009	0.21518					174	3971.46	99.96	3.76338	0.00946	3.75392
175	3970.41	99.93	0.08957	0.00917	0.0804					175	3973	100	3.32607	0.00894	3.31713
176	3972.35	99.98	0.21085	0.00956	0.20129					176	3972.5	99.99	1.75777	0.0093	1.74847
177	3972.17	99.98	0.15227	0.00881	0.14346					177	3972.67	99.99	2.26808	0.00902	2.25906
178	3973.01	100	0.21813	0.00913	0.209					178	3972.35	99.98	3.49803	0.00905	3.48898
179	3972.5	99.99	0.17044	0.00909	0.16135					179	3972.35	99.98	2.96443	0.00943	2.955
180	3967.18	99.85	0.16495	0.00908	0.15587					180	3973	100	2.67816	0.00929	2.66887
181	3973	100	0.115	0.00919	0.10581					181	3972.35	99.98	1.41152	0.00904	1.40248
182	3970.41	99.93	0.11889	0.004	0.11489					182	3972.5	99.99	0.81481	0.00921	0.8056
183	3971.98	99.97	0.18043	0.00926	0.17117					183	3972.67	99.99	3.28319	0.00909	3.2741
184	3970.09	99.93	0.1672	0.00906	0.15814					184	3973	100	0.81869	0.0093	0.80939
185	3972.03	99.98	0.16524	0.00951	0.15573					185	3971.06	99.95	3.46358	0.00918	3.4544
186	3972.67	99.99	0.07677	0.004	0.07277					186	3967.5	99.86	1.39048	0.00912	1.38136
187	3971.06	99.95	0.18601	0.0091	0.17691					187	3972.67	99.99	3.21186	0.0095	3.20236
188	3969.91	99.92	0.14164	0.00919	0.13245					188	3972.5	99.99	2.55979	0.00919	2.5506
189	3968.82	99.89	0.10622	0.00921	0.09701					189	3971.98	99.97	3.84525	0.00945	3.8358
190	3973	100	0.19649	0.00909	0.1874					190	3972.35	99.98	1.53129	0.00932	1.52197
191	3970.73	99.94	0.09784	0.00955	0.08829					191	3971.98	99.97	3.45495	0.00933	3.44562
192	3971.85	99.97	0.11858	0.00968	0.1089					192	3971.98	99.97	3.38251	0.00925	3.37326
193	3960.61	99.69	0.17183	0.00917	0.16266					193	3973	100	1.70517	0.00935	1.69582
194	3971.46	99.96	0.13872	0.0093	0.12942					194	3972.67	99.99	2.87675	0.009	2.86775
195	3962.98	99.75	0.1472	0.00922	0.13798					195	3973	100	1.26942	0.00928	1.26014
196	3972.67	99.99	0.15738	0.00888	0.1485					196	3972.35	99.98	2.48399	0.0097	2.47429
197	3966.53	99.84	0.22041	0.00934	0.21107					197	3971.06	99.95	2.1568	0.00922	2.14758
198	3972.67	99.99	0.14867	0.00917	0.1395					198	3972.35	99.98	3.45093	0.00954	3.44139
199	3973	100	0.14831	0.00908	0.13923					199	3972.35	99.98	2.52304	0.0094	2.51364
200	3973	100	0.19038	0.00916	0.18122					200	3972.35	99.98	0.61517	0.00915	0.60602

## Sheet: 06_HCFACO_Seeds(200)
Fast Converegnce Exp							Fast Converegnce Exp			Slow Converegnce Exp							Slow Converegnce Exp
#	CBLF	Quality	Taumax	Taumin	DeltaTauminmax		Global Optimal Solution =	3973.01		#	CBLF	Quality	Taumax	Taumin	DeltaTauminmax		Global Optimal Solution =	3973.01
1	3972.67	99.99	0.13067	0.0092	0.12147		Minimum Optimal Solution =	3949.23		1	3972.67	99.99	3.81388	0.0092	3.80468		Minimum Optimal Solution =	3953.28
2	3970.41	99.93	0.16491	0.00921	0.1557		Mean of Optimal Solution =	3970.14		2	3972.67	99.99	2.53409	0.00913	2.52496		Mean of Optimal Solution =	3972.15
3	3972.67	99.99	0.19292	0.00938	0.18354		Median of Optimal Solution =	3970.14		3	3972.03	99.98	1.98635	0.00904	1.97731		Median of Optimal Solution =	3972.15
4	3971.46	99.96	0.13266	0.009	0.12366		Solution Standrad Deviation =	4.0732		4	3972.67	99.99	2.95149	0.00909	2.9424		Solution Standrad Deviation =	1.7308
5	3972.67	99.99	0.20665	0.00934	0.19731		Average Price =	29.185		5	3972.5	99.99	0.90493	0.00909	0.89584		Average Price =	87.57
6	3972.03	99.98	0.24049	0.00942	0.23107		Relability =	74.5		6	3972.67	99.99	3.85725	0.00915	3.8481		Relability =	97.5
7	3972.67	99.99	0.13507	0.0091	0.12597		Normalized Price =	39.1745		7	3970.41	99.93	2.5059	0.00915	2.49675		Normalized Price =	89.8154
8	3973	100	0.32744	0.00895	0.31849		Average Solution Quality =	99.9278		8	3972.67	99.99	1.6349	0.00888	1.62602		Average Solution Quality =	99.9782
9	3958.54	99.64	0.08577	0.00929	0.07648		Average FDC =	-135.654		9	3972.35	99.98	2.69743	0.00888	2.68855		Average FDC =	-55.771
10	3968.47	99.89	0.14407	0.00902	0.13505		Correlation Coefficent =	-0.6759		10	3973.01	100	3.05042	0.00915	3.04127		Correlation Coefficent =	-0.66396
11	3972.67	99.99	0.26653	0.00916	0.25737		Solution Robustness =	974.701		11	3971.98	99.97	2.11326	0.00958	2.10368		Solution Robustness =	2295.02
12	3972.35	99.98	0.13881	0.00926	0.12955		Performance Rate =	0.025527		12	3972.67	99.99	3.79777	0.004	3.79377		Performance Rate =	0.011134
13	3972.67	99.99	0.09739	0.00935	0.08804		Average Elapsed Time =	1.3635		13	3973	100	2.21478	0.00901	2.20577		Average Elapsed Time =	4.0967
14	3973	100	0.20633	0.0088	0.19753					14	3971.06	99.95	3.78624	0.00942	3.77682
15	3968.36	99.88	0.09732	0.00923	0.08809					15	3972.67	99.99	2.80664	0.00962	2.79702
16	3973	100	0.15105	0.00916	0.14189					16	3972.67	99.99	1.16992	0.00895	1.16097
17	3964.74	99.79	0.13076	0.0091	0.12166					17	3972.67	99.99	1.23407	0.00877	1.2253
18	3973	100	0.16541	0.00898	0.15643					18	3970.41	99.93	3.54316	0.00943	3.53373
19	3971.98	99.97	0.23482	0.00939	0.22543					19	3973.01	100	2.21811	0.00912	2.20899
20	3972.67	99.99	0.24225	0.00953	0.23272					20	3972.67	99.99	2.09617	0.00925	2.08692
21	3971.46	99.96	0.10109	0.0092	0.09189					21	3973	100	2.24723	0.00896	2.23827
22	3972.5	99.99	0.18051	0.00862	0.17189					22	3972.35	99.98	2.3461	0.00876	2.33734
23	3972.67	99.99	0.28729	0.00892	0.27837					23	3973.01	100	1.46302	0.00908	1.45394
24	3971.98	99.97	0.17174	0.00904	0.1627					24	3972.35	99.98	1.29481	0.00924	1.28557
25	3972.5	99.99	0.11768	0.00908	0.1086					25	3972.35	99.98	1.93344	0.00935	1.92409
26	3964.92	99.8	0.14527	0.00905	0.13622					26	3970.41	99.93	3.29364	0.00909	3.28455
27	3972.67	99.99	0.14415	0.00909	0.13506					27	3971.06	99.95	2.31715	0.00891	2.30824
28	3973	100	0.2006	0.00948	0.19112					28	3970.41	99.93	2.13046	0.00911	2.12135
29	3970.09	99.93	0.15411	0.00924	0.14487					29	3971.98	99.97	3.13681	0.00944	3.12737
30	3971.98	99.97	0.20669	0.00885	0.19784					30	3972.35	99.98	2.89122	0.00963	2.88159
31	3971.06	99.95	0.10104	0.00953	0.09151					31	3972.35	99.98	2.54329	0.00944	2.53385
32	3968.88	99.9	0.14895	0.00908	0.13987					32	3970.73	99.94	2.23359	0.00896	2.22463
33	3973	100	0.12767	0.00989	0.11778					33	3971.98	99.97	1.05574	0.00907	1.04667
34	3972.03	99.98	0.0852	0.00939	0.07581					34	3972.5	99.99	2.51667	0.0089	2.50777
35	3968.8	99.89	0.20933	0.00918	0.20015					35	3972.5	99.99	3.36438	0.00934	3.35504
36	3965.24	99.8	0.13352	0.004	0.12952					36	3972.67	99.99	2.8468	0.00908	2.83772
37	3973	100	0.16623	0.00922	0.15701					37	3973	100	2.52211	0.00943	2.51268
38	3972.35	99.98	0.14551	0.00974	0.13577					38	3972.35	99.98	0.92191	0.00881	0.9131
39	3972.35	99.98	0.15564	0.004	0.15164					39	3972.67	99.99	3.31673	0.00941	3.30732
40	3962.66	99.74	0.18097	0.00895	0.17202					40	3973	100	1.14373	0.00902	1.13471
41	3971.06	99.95	0.11935	0.00922	0.11013					41	3971.98	99.97	2.96576	0.00951	2.95625
42	3972.67	99.99	0.14055	0.00936	0.13119					42	3971.98	99.97	3.4941	0.009	3.4851
43	3965.78	99.82	0.19369	0.0096	0.18409					43	3973	100	3.05403	0.00933	3.0447
44	3971.38	99.96	0.09751	0.00965	0.08786					44	3972.67	99.99	2.63454	0.00926	2.62528
45	3971.98	99.97	0.17986	0.0095	0.17036					45	3972.35	99.98	2.4602	0.00906	2.45114
46	3972.67	99.99	0.1598	0.0094	0.1504					46	3972.35	99.98	3.52204	0.00905	3.51299
47	3960.86	99.69	0.07529	0.00885	0.06644					47	3972.67	99.99	2.13671	0.009	2.12771
48	3970.43	99.94	0.20953	0.00921	0.20032					48	3971.06	99.95	3.63042	0.00963	3.62079
49	3971.98	99.97	0.17612	0.00889	0.16723					49	3972.67	99.99	1.39738	0.00929	1.38809
50	3960.83	99.69	0.08617	0.00881	0.07736					50	3971.06	99.95	3.57666	0.00924	3.56742
51	3971.98	99.97	0.13284	0.00901	0.12383					51	3970.73	99.94	1.86689	0.00932	1.85757
52	3973	100	0.16876	0.00875	0.16001					52	3972.67	99.99	2.63442	0.00936	2.62506
53	3966.86	99.85	0.18932	0.00915	0.18017					53	3972.67	99.99	2.8746	0.00884	2.86576
54	3971.46	99.96	0.12281	0.00948	0.11333					54	3973	100	2.86466	0.00883	2.85583
55	3971.46	99.96	0.19718	0.0095	0.18768					55	3972.35	99.98	1.99559	0.00893	1.98666
56	3973	100	0.07469	0.0094	0.06529					56	3972.35	99.98	1.74932	0.00941	1.73991
57	3971.46	99.96	0.15154	0.00944	0.1421					57	3973.01	100	3.66288	0.00937	3.65351
58	3956.84	99.59	0.10287	0.00923	0.09364					58	3971.46	99.96	3.49125	0.00944	3.48181
59	3972.03	99.98	0.17072	0.00927	0.16145					59	3972.35	99.98	0.74832	0.00941	0.73891
60	3971.98	99.97	0.11415	0.00943	0.10472					60	3972.5	99.99	3.38487	0.00905	3.37582
61	3967.33	99.86	0.1158	0.00941	0.10639					61	3971.98	99.97	1.3247	0.00917	1.31553
62	3972.67	99.99	0.13757	0.00931	0.12826					62	3971.98	99.97	2.09435	0.00936	2.08499
63	3968.88	99.9	0.1104	0.00918	0.10122					63	3972.5	99.99	2.15834	0.00947	2.14887
64	3973.01	100	0.1656	0.00896	0.15664					64	3972.03	99.98	1.39048	0.00941	1.38107
65	3968.47	99.89	0.15684	0.00886	0.14798					65	3973	100	2.52742	0.00936	2.51806
66	3970.73	99.94	0.11847	0.00959	0.10888					66	3972.67	99.99	2.73704	0.00919	2.72785
67	3972.03	99.98	0.19043	0.00937	0.18106					67	3972.67	99.99	2.49825	0.00947	2.48878
68	3972.35	99.98	0.09852	0.00937	0.08915					68	3972.35	99.98	1.73272	0.00953	1.72319
69	3972.03	99.98	0.13478	0.00919	0.12559					69	3973	100	2.66354	0.0095	2.65404
70	3971.06	99.95	0.14072	0.00956	0.13116					70	3973.01	100	0.5933	0.00867	0.58463
71	3972.67	99.99	0.13047	0.00952	0.12095					71	3972.35	99.98	3.30018	0.00907	3.29111
72	3972.35	99.98	0.14275	0.00941	0.13334					72	3972.67	99.99	2.34915	0.00929	2.33986
73	3970.41	99.93	0.14864	0.00903	0.13961					73	3973	100	3.40458	0.00906	3.39552
74	3970.73	99.94	0.10198	0.00931	0.09267					74	3970.41	99.93	2.86419	0.00906	2.85513
75	3973	100	0.09385	0.00917	0.08468					75	3968.36	99.88	2.69275	0.00941	2.68334
76	3973	100	0.18025	0.00896	0.17129					76	3972.5	99.99	1.36703	0.00901	1.35802
77	3971.7	99.97	0.10147	0.00906	0.09241					77	3966.86	99.85	2.66424	0.004	2.66024
78	3973.01	100	0.49375	0.00944	0.48431					78	3972.35	99.98	1.22329	0.00944	1.21385
79	3972.35	99.98	0.09755	0.00947	0.08808					79	3972.35	99.98	2.31311	0.00948	2.30363
80	3956.33	99.58	0.13611	0.00925	0.12686					80	3972.67	99.99	3.48155	0.00895	3.4726
81	3961.36	99.71	0.09857	0.00863	0.08994					81	3973	100	2.98378	0.00948	2.9743
82	3972.03	99.98	0.19893	0.00907	0.18986					82	3971.98	99.97	3.11715	0.00878	3.10837
83	3968.15	99.88	0.13777	0.0096	0.12817					83	3972.5	99.99	0.66482	0.00914	0.65568
84	3967.84	99.87	0.12597	0.00927	0.1167					84	3972.5	99.99	2.57394	0.00939	2.56455
85	3972.67	99.99	0.12343	0.00905	0.11438					85	3972.5	99.99	3.33506	0.00907	3.32599
86	3971.46	99.96	0.15558	0.00944	0.14614					86	3973	100	1.04333	0.00923	1.0341
87	3973	100	0.15721	0.00898	0.14823					87	3972.35	99.98	2.55063	0.00942	2.54121
88	3972.67	99.99	0.11583	0.009	0.10683					88	3972.67	99.99	2.82475	0.0094	2.81535
89	3972.67	99.99	0.33094	0.00946	0.32148					89	3973	100	3.44956	0.00926	3.4403
90	3967.5	99.86	0.15685	0.00925	0.1476					90	3972.67	99.99	2.98217	0.00899	2.97318
91	3972.67	99.99	0.17697	0.00941	0.16756					91	3972.67	99.99	2.14964	0.00926	2.14038
92	3971.98	99.97	0.26281	0.00928	0.25353					92	3972.03	99.98	1.75224	0.00955	1.74269
93	3967.5	99.86	0.10644	0.00961	0.09683					93	3973	100	2.96235	0.00912	2.95323
94	3972.67	99.99	0.12909	0.0093	0.11979					94	3973.01	100	1.37236	0.00946	1.3629
95	3972.5	99.99	0.17831	0.00871	0.1696					95	3972.67	99.99	2.59565	0.00913	2.58652
96	3972.35	99.98	0.13434	0.00933	0.12501					96	3972.67	99.99	2.85022	0.00914	2.84108
97	3972.03	99.98	0.10489	0.00939	0.0955					97	3973	100	2.71757	0.00881	2.70876
98	3970.41	99.93	0.09751	0.00906	0.08845					98	3969.44	99.91	1.68113	0.00925	1.67188
99	3970.73	99.94	0.2258	0.00974	0.21606					99	3972.67	99.99	2.40779	0.00967	2.39812
100	3973	100	0.13981	0.009	0.13081					100	3973.01	100	4.01846	0.00883	4.00963
101	3972.35	99.98	0.21189	0.00907	0.20282					101	3973	100	3.54294	0.00976	3.53318
102	3973.01	100	0.13613	0.00916	0.12697					102	3972.67	99.99	0.75091	0.00936	0.74155
103	3970.95	99.95	0.16643	0.00892	0.15751					103	3972.35	99.98	2.81396	0.00965	2.80431
104	3967.84	99.87	0.12156	0.00975	0.11181					104	3953.28	99.5	3.59723	0.00901	3.58822
105	3972.03	99.98	0.21135	0.00899	0.20236					105	3972.03	99.98	3.22741	0.00919	3.21822
106	3972.35	99.98	0.16054	0.00909	0.15145					106	3972.67	99.99	2.49704	0.00934	2.4877
107	3966.24	99.83	0.11432	0.0094	0.10492					107	3973	100	2.3685	0.00929	2.35921
108	3952.85	99.49	0.07726	0.00942	0.06784					108	3972.67	99.99	2.84024	0.00908	2.83116
109	3973	100	0.17329	0.00909	0.1642					109	3972.67	99.99	3.69377	0.00911	3.68466
110	3964.92	99.8	0.16689	0.00927	0.15762					110	3972.67	99.99	1.30858	0.00899	1.29959
111	3973	100	0.14764	0.00969	0.13795					111	3972.5	99.99	2.20669	0.00944	2.19725
112	3973	100	0.37076	0.00941	0.36135					112	3973.01	100	2.23882	0.00941	2.22941
113	3972.5	99.99	0.2949	0.0097	0.2852					113	3972.5	99.99	2.18196	0.00903	2.17293
114	3969.44	99.91	0.16406	0.00929	0.15477					114	3973.01	100	3.44476	0.0095	3.43526
115	3972.03	99.98	0.1734	0.00907	0.16433					115	3972.5	99.99	1.34248	0.00899	1.33349
116	3972.35	99.98	0.23328	0.00933	0.22395					116	3970.73	99.94	1.70365	0.00932	1.69433
117	3971.46	99.96	0.20063	0.00965	0.19098					117	3972.5	99.99	3.01412	0.00916	3.00496
118	3972.67	99.99	0.21195	0.00902	0.20293					118	3971.46	99.96	2.34233	0.00955	2.33278
119	3957.63	99.61	0.11496	0.00949	0.10547					119	3972.67	99.99	3.41224	0.00947	3.40277
120	3971.98	99.97	0.20006	0.00901	0.19105					120	3970.73	99.94	1.45587	0.00924	1.44663
121	3971.06	99.95	0.10107	0.00926	0.09181					121	3971.98	99.97	2.67994	0.00868	2.67126
122	3962.98	99.75	0.08019	0.00902	0.07117					122	3972.35	99.98	3.34439	0.00932	3.33507
123	3969.76	99.92	0.11304	0.00965	0.10339					123	3973	100	2.59896	0.00952	2.58944
124	3972.5	99.99	0.16849	0.00882	0.15967					124	3972.67	99.99	3.0933	0.0094	3.0839
125	3971.98	99.97	0.20709	0.00928	0.19781					125	3973	100	0.70145	0.00917	0.69228
126	3968.88	99.9	0.14889	0.00919	0.1397					126	3972.67	99.99	2.6997	0.00917	2.69053
127	3970.09	99.93	0.20177	0.00919	0.19258					127	3970.73	99.94	2.24402	0.00931	2.23471
128	3973.01	100	0.10179	0.00887	0.09292					128	3972.67	99.99	3.26684	0.00919	3.25765
129	3969.91	99.92	0.07237	0.00904	0.06333					129	3971.46	99.96	2.93347	0.00949	2.92398
130	3971.98	99.97	0.16201	0.00934	0.15267					130	3972.35	99.98	1.97851	0.0091	1.96941
131	3965.24	99.8	0.15781	0.0088	0.14901					131	3973	100	2.4294	0.0089	2.4205
132	3968.36	99.88	0.15224	0.00948	0.14276					132	3971.46	99.96	2.1292	0.00908	2.12012
133	3972.35	99.98	0.14773	0.00932	0.13841					133	3972.35	99.98	1.02539	0.00927	1.01612
134	3972.35	99.98	0.13098	0.00915	0.12183					134	3971.98	99.97	3.74905	0.00898	3.74007
135	3972.35	99.98	0.17565	0.0091	0.16655					135	3972.67	99.99	1.95605	0.00902	1.94703
136	3972.67	99.99	0.11135	0.00952	0.10183					136	3972.5	99.99	3.415	0.00934	3.40566
137	3962.5	99.74	0.07622	0.00934	0.06688					137	3963.62	99.76	3.59315	0.00941	3.58374
138	3966.88	99.85	0.13611	0.0097	0.12641					138	3972.67	99.99	3.26469	0.00956	3.25513
139	3970.09	99.93	0.14847	0.0089	0.13957					139	3970.73	99.94	2.88427	0.00925	2.87502
140	3972.67	99.99	0.21531	0.00941	0.2059					140	3973.01	100	1.36625	0.00892	1.35733
141	3970.09	99.93	0.13538	0.00911	0.12627					141	3973	100	2.87698	0.00874	2.86824
142	3972.03	99.98	0.1425	0.00929	0.13321					142	3972.67	99.99	0.85455	0.00901	0.84554
143	3973.01	100	0.21445	0.00935	0.2051					143	3971.98	99.97	3.59179	0.00942	3.58237
144	3967.5	99.86	0.10089	0.00907	0.09182					144	3972.03	99.98	3.08195	0.00938	3.07257
145	3972.67	99.99	0.15333	0.00917	0.14416					145	3973	100	1.89461	0.00939	1.88522
146	3972.5	99.99	0.19943	0.00914	0.19029					146	3973	100	1.94548	0.00951	1.93597
147	3970.73	99.94	0.12758	0.00978	0.1178					147	3973.01	100	2.69157	0.00925	2.68232
148	3972.35	99.98	0.21763	0.00919	0.20844					148	3971.98	99.97	3.1778	0.00939	3.16841
149	3968.88	99.9	0.12993	0.00952	0.12041					149	3972.5	99.99	2.95383	0.00938	2.94445
150	3964.59	99.79	0.12413	0.00881	0.11532					150	3973	100	1.55655	0.00896	1.54759
151	3972.35	99.98	0.16072	0.00946	0.15126					151	3971.46	99.96	2.51175	0.00948	2.50227
152	3972.03	99.98	0.1591	0.009	0.1501					152	3973.01	100	0.50745	0.004	0.50345
153	3969.39	99.91	0.18419	0.00918	0.17501					153	3973	100	1.3251	0.0092	1.3159
154	3972.35	99.98	0.23486	0.00902	0.22584					154	3972.67	99.99	4.06188	0.00943	4.05245
155	3963.19	99.75	0.26167	0.00927	0.2524					155	3972.67	99.99	3.56322	0.00995	3.55327
156	3971.98	99.97	0.19551	0.00923	0.18628					156	3971.46	99.96	3.07919	0.0092	3.06999
157	3972.67	99.99	0.08967	0.00946	0.08021					157	3972.67	99.99	2.07174	0.00927	2.06247
158	3967.64	99.86	0.15577	0.00913	0.14664					158	3971.46	99.96	2.55765	0.00951	2.54814
159	3971.46	99.96	0.11782	0.0092	0.10862					159	3973.01	100	2.66115	0.00949	2.65166
160	3971.98	99.97	0.13943	0.00922	0.13021					160	3973.01	100	3.47613	0.00895	3.46718
161	3970.09	99.93	0.08369	0.00924	0.07445					161	3972.35	99.98	3.54363	0.00965	3.53398
162	3965.26	99.8	0.11981	0.00917	0.11064					162	3972.67	99.99	1.96362	0.00922	1.9544
163	3972.5	99.99	0.12532	0.00932	0.116					163	3971.98	99.97	1.49592	0.00884	1.48708
164	3968.36	99.88	0.25149	0.00913	0.24236					164	3972.67	99.99	2.30264	0.00901	2.29363
165	3969.26	99.91	0.11045	0.00923	0.10122					165	3972.67	99.99	2.33916	0.00919	2.32997
166	3971.46	99.96	0.16159	0.00887	0.15272					166	3973	100	2.31579	0.00935	2.30644
167	3973.01	100	0.12453	0.00919	0.11534					167	3973.01	100	2.54783	0.00934	2.53849
168	3968.88	99.9	0.09357	0.0089	0.08467					168	3972.5	99.99	3.80175	0.00906	3.79269
169	3972.67	99.99	0.23369	0.00913	0.22456					169	3972.67	99.99	2.27738	0.00901	2.26837
170	3949.23	99.4	0.09827	0.00898	0.08929					170	3970.09	99.93	3.03216	0.00936	3.0228
171	3972.35	99.98	0.131	0.00899	0.12201					171	3973.01	100	0.58315	0.00912	0.57403
172	3972.67	99.99	0.13017	0.00928	0.12089					172	3972.35	99.98	3.32766	0.00917	3.31849
173	3972.35	99.98	0.25744	0.00976	0.24768					173	3971.98	99.97	1.83357	0.00889	1.82468
174	3961.36	99.71	0.11979	0.00928	0.11051					174	3971.98	99.97	3.23595	0.00924	3.22671
175	3972.35	99.98	0.24931	0.00892	0.24039					175	3972.67	99.99	1.45431	0.00926	1.44505
176	3972.67	99.99	0.13966	0.00977	0.12989					176	3972.67	99.99	3.87157	0.00944	3.86213
177	3973	100	0.10105	0.00924	0.09181					177	3972.35	99.98	3.03897	0.00951	3.02946
178	3972.35	99.98	0.21404	0.00891	0.20513					178	3972.35	99.98	3.98757	0.00958	3.97799
179	3971.98	99.97	0.19017	0.00919	0.18098					179	3971.46	99.96	2.85799	0.00925	2.84874
180	3972.5	99.99	0.08066	0.0091	0.07156					180	3973.01	100	1.10944	0.00899	1.10045
181	3971.2	99.95	0.081	0.00885	0.07215					181	3972.35	99.98	1.47282	0.00936	1.46346
182	3970.95	99.95	0.09411	0.0092	0.08491					182	3972.67	99.99	2.24644	0.00872	2.23772
183	3972.67	99.99	0.27425	0.00913	0.26512					183	3971.06	99.95	4.2359	0.00949	4.22641
184	3968.88	99.9	0.14712	0.00912	0.138					184	3973	100	4.06236	0.00932	4.05304
185	3968.88	99.9	0.13217	0.0091	0.12307					185	3968.47	99.89	1.91162	0.009	1.90262
186	3962.66	99.74	0.08441	0.00878	0.07563					186	3972.5	99.99	2.26259	0.00911	2.25348
187	3965.78	99.82	0.19148	0.00938	0.1821					187	3973.01	100	1.87115	0.00886	1.86229
188	3952.85	99.49	0.15976	0.00899	0.15077					188	3973	100	2.08098	0.00927	2.07171
189	3972.67	99.99	0.25644	0.00983	0.24661					189	3972.67	99.99	3.0359	0.00951	3.02639
190	3971.98	99.97	0.14408	0.0091	0.13498					190	3971.98	99.97	0.742	0.00883	0.73317
191	3966.21	99.83	0.16985	0.00888	0.16097					191	3972.35	99.98	1.22025	0.00902	1.21123
192	3970.95	99.95	0.12365	0.0091	0.11455					192	3972.5	99.99	3.01304	0.00954	3.0035
193	3972.5	99.99	0.42763	0.00901	0.41862					193	3973	100	0.48063	0.00927	0.47136
194	3970.09	99.93	0.12657	0.00904	0.11753					194	3973.01	100	0.95666	0.00911	0.94755
195	3971.06	99.95	0.15343	0.00885	0.14458					195	3972.35	99.98	0.81802	0.00903	0.80899
196	3971.46	99.96	0.16689	0.00928	0.15761					196	3972.5	99.99	0.91811	0.0087	0.90941
197	3967.5	99.86	0.21636	0.00966	0.2067					197	3973	100	0.59643	0.00897	0.58746
198	3970.73	99.94	0.23681	0.00934	0.22747					198	3969.12	99.9	3.49212	0.00936	3.48276
199	3973	100	0.51623	0.00907	0.50716					199	3972.5	99.99	2.56318	0.00927	2.55391
200	3972.03	99.98	0.11508	0.00971	0.10537					200	3971.06	99.95	3.05169	0.00919	3.0425

## Sheet: 07_HCFACO_Seeds(167)
Fast Converegnce Exp							Fast Converegnce Exp			Slow Converegnce Exp							Slow Converegnce Exp
#	CBLF	Quality	Taumax	Taumin	DeltaTauminmax		Global Optimal Solution =	3973.01		#	CBLF	Quality	Taumax	Taumin	DeltaTauminmax		Global Optimal Solution =	3973.01
1	3972.67	99.99	0.20188	0.00933	0.19255		Minimum Optimal Solution =	3945.61		1	3972.67	99.99	1.51776	0.00933	1.50843		Minimum Optimal Solution =	3960.61
2	3968.36	99.88	0.07278	0.00913	0.06365		Mean of Optimal Solution =	3970.73		2	3972.17	99.98	0.74636	0.00898	0.73738		Mean of Optimal Solution =	3971.98
3	3973	100	0.21981	0.00966	0.21015		Median of Optimal Solution=	3970.73		3	3970.09	99.93	3.27023	0.00898	3.26125		Median of Optimal Solution =	3971.98
4	3972.35	99.98	0.23596	0.00927	0.22669		Solution Standrad Deviation =	3.3417		4	3972.35	99.98	3.14403	0.00934	3.13469		Solution Standrad Deviation =	1.6662
5	3973	100	0.20125	0.00909	0.19216		Average Price =	29.015		5	3972.67	99.99	3.31943	0.00932	3.31011		Average Price =	86.97
6	3971.98	99.97	0.12932	0.00945	0.11987		Relability =	81		6	3972.67	99.99	3.87534	0.00934	3.866		Relability =	92
7	3969.91	99.92	0.11539	0.00912	0.10627		Normalized Price =	35.821		7	3972.67	99.99	3.01284	0.00941	3.00343		Normalized Price =	94.5326
8	3973.01	100	0.13552	0.00907	0.12645		Average Solution Quality =	99.9426		8	3972.5	99.99	3.16856	0.00914	3.15942		Average Solution Quality =	99.974
9	3972.67	99.99	0.18875	0.00982	0.17893		Average FDC =	-127.137		9	3972.35	99.98	3.1529	0.00907	3.14383		Average FDC =	-57.4932
10	3972.67	99.99	0.21629	0.00892	0.20737		Correlation Coefficent =	-0.66169		10	3972.67	99.99	3.6057	0.00954	3.59616		Correlation Coefficent =	-0.69259
11	3972.03	99.98	0.16481	0.0094	0.15541		Solution Robustness =	1188.25		11	3971.06	99.95	2.67319	0.00979	2.6634		Solution Robustness =	2383.83
12	3971.98	99.97	0.08526	0.00927	0.07599		Performance Rate =	0.027917		12	3971.46	99.96	3.70765	0.00945	3.6982		Performance Rate =	0.010578
13	3971.98	99.97	0.13137	0.00924	0.12213		Average Elapsed Time =	1.5162		13	3973	100	2.76865	0.00933	2.75932		Average Elapsed Time =	4.0468
14	3971.98	99.97	0.20079	0.00946	0.19133					14	3971.46	99.96	4.16947	0.00944	4.16003
15	3972.67	99.99	0.18174	0.00945	0.17229					15	3973.01	100	2.77712	0.00913	2.76799
16	3973.01	100	0.15743	0.00895	0.14848					16	3970.09	99.93	2.73563	0.00905	2.72658
17	3969.12	99.9	0.07688	0.00944	0.06744					17	3972.35	99.98	0.92557	0.00913	0.91644
18	3972.35	99.98	0.15273	0.00899	0.14374					18	3972.35	99.98	1.98141	0.00906	1.97235
19	3972.35	99.98	0.06326	0.00949	0.05377					19	3970.73	99.94	2.2385	0.00918	2.22932
20	3969.44	99.91	0.20926	0.00938	0.19988					20	3962.16	99.73	2.48559	0.00948	2.47611
21	3972.67	99.99	0.1678	0.0093	0.1585					21	3973.01	100	0.5853	0.0095	0.5758
22	3968.47	99.89	0.10621	0.00899	0.09722					22	3973	100	2.99069	0.0095	2.98119
23	3972.67	99.99	0.14364	0.00923	0.13441					23	3972.5	99.99	3.32352	0.00961	3.31391
24	3972.5	99.99	0.12156	0.00951	0.11205					24	3968.88	99.9	1.99785	0.00935	1.9885
25	3973.01	100	0.09872	0.00873	0.08999					25	3968.36	99.88	3.55172	0.00954	3.54218
26	3972.03	99.98	0.15114	0.009	0.14214					26	3973	100	1.4176	0.00916	1.40844
27	3973.01	100	0.15652	0.00904	0.14748					27	3973	100	2.28142	0.00862	2.2728
28	3971.98	99.97	0.11179	0.00928	0.10251					28	3972.35	99.98	2.4469	0.00977	2.43713
29	3973	100	0.21729	0.00927	0.20802					29	3971.46	99.96	0.88068	0.0094	0.87128
30	3968.88	99.9	0.17999	0.00905	0.17094					30	3972.5	99.99	1.93033	0.00908	1.92125
31	3969.39	99.91	0.1673	0.004	0.1633					31	3972.35	99.98	3.66235	0.00924	3.65311
32	3964.09	99.78	0.09792	0.00962	0.0883					32	3972.67	99.99	0.75677	0.004	0.75277
33	3964.92	99.8	0.18674	0.00894	0.1778					33	3973.01	100	3.52579	0.00914	3.51665
34	3971.98	99.97	0.18454	0.00924	0.1753					34	3973	100	2.35403	0.00918	2.34485
35	3970.41	99.93	0.167	0.00975	0.15725					35	3971.06	99.95	1.71109	0.00906	1.70203
36	3972.5	99.99	0.17147	0.00944	0.16203					36	3972.67	99.99	3.15032	0.00904	3.14128
37	3972.35	99.98	0.11428	0.00938	0.1049					37	3973	100	1.98009	0.00938	1.97071
38	3969.39	99.91	0.18974	0.00922	0.18052					38	3973.01	100	3.15829	0.00929	3.149
39	3972.67	99.99	0.1248	0.00924	0.11556					39	3972.67	99.99	2.05468	0.00933	2.04535
40	3970.43	99.94	0.16938	0.00914	0.16024					40	3973	100	3.72317	0.0093	3.71387
41	3973.01	100	0.17617	0.00932	0.16685					41	3972.35	99.98	3.16977	0.00911	3.16066
42	3971.98	99.97	0.17694	0.00938	0.16756					42	3971.98	99.97	3.2512	0.00988	3.24132
43	3963.3	99.76	0.37721	0.0092	0.36801					43	3971.06	99.95	3.68238	0.0091	3.67328
44	3972.35	99.98	0.12171	0.00938	0.11233					44	3972.03	99.98	1.48627	0.00971	1.47656
45	3964.94	99.8	0.1989	0.00922	0.18968					45	3972.67	99.99	3.80207	0.004	3.79807
46	3973.01	100	0.16276	0.00927	0.15349					46	3969.12	99.9	3.62167	0.00942	3.61225
47	3964.92	99.8	0.09358	0.00916	0.08442					47	3973	100	2.81704	0.0092	2.80784
48	3972.67	99.99	0.20232	0.00946	0.19286					48	3972.5	99.99	2.72424	0.0091	2.71514
49	3972.67	99.99	0.09438	0.00954	0.08484					49	3972.67	99.99	2.86284	0.00907	2.85377
50	3972.35	99.98	0.18593	0.00877	0.17716					50	3972.35	99.98	2.69938	0.00923	2.69015
51	3968.88	99.9	0.12004	0.00901	0.11103					51	3972.5	99.99	2.27834	0.00921	2.26913
52	3970.09	99.93	0.15283	0.00907	0.14376					52	3972.67	99.99	2.92182	0.00893	2.91289
53	3967.5	99.86	0.31039	0.00876	0.30163					53	3972.5	99.99	2.0036	0.00928	1.99432
54	3970.09	99.93	0.17477	0.00927	0.1655					54	3972.5	99.99	2.14931	0.00912	2.14019
55	3972.35	99.98	0.10579	0.00935	0.09644					55	3973.01	100	2.40353	0.00926	2.39427
56	3970.41	99.93	0.19263	0.00883	0.1838					56	3972.5	99.99	3.00991	0.00913	3.00078
57	3970.41	99.93	0.18108	0.00937	0.17171					57	3971.98	99.97	3.6938	0.00932	3.68448
58	3968.88	99.9	0.11448	0.00908	0.1054					58	3973	100	3.55532	0.00961	3.54571
59	3972.35	99.98	0.14002	0.00889	0.13113					59	3972.67	99.99	0.79867	0.00877	0.7899
60	3971.98	99.97	0.25321	0.00919	0.24402					60	3968.8	99.89	2.8202	0.00918	2.81102
61	3972.35	99.98	0.20967	0.009	0.20067					61	3973	100	3.55087	0.00904	3.54183
62	3972.03	99.98	0.20073	0.00962	0.19111					62	3968.88	99.9	2.14776	0.00915	2.13861
63	3966.53	99.84	0.20624	0.00926	0.19698					63	3972.35	99.98	2.57833	0.00898	2.56935
64	3973	100	0.08944	0.00944	0.08					64	3973	100	3.1071	0.00937	3.09773
65	3966.53	99.84	0.22561	0.00899	0.21662					65	3972.67	99.99	2.09986	0.00903	2.09083
66	3973	100	0.15051	0.0095	0.14101					66	3972.35	99.98	0.80389	0.00919	0.7947
67	3962.27	99.73	0.08515	0.00953	0.07562					67	3972.35	99.98	2.22198	0.00975	2.21223
68	3968.88	99.9	0.08426	0.00914	0.07512					68	3972.67	99.99	1.68928	0.00926	1.68002
69	3973	100	0.20063	0.00925	0.19138					69	3972.35	99.98	2.39563	0.00927	2.38636
70	3969.39	99.91	0.08128	0.00914	0.07214					70	3972.35	99.98	2.34472	0.00925	2.33547
71	3971.46	99.96	0.14951	0.00905	0.14046					71	3972.5	99.99	2.73209	0.00911	2.72298
72	3968.88	99.9	0.16931	0.00935	0.15996					72	3969.76	99.92	2.01754	0.0091	2.00844
73	3964.92	99.8	0.06291	0.00906	0.05385					73	3972.35	99.98	3.45268	0.0088	3.44388
74	3972.67	99.99	0.22074	0.00938	0.21136					74	3972.67	99.99	2.75917	0.00924	2.74993
75	3972.67	99.99	0.19383	0.004	0.18983					75	3972.35	99.98	3.70392	0.00961	3.69431
76	3967.84	99.87	0.21679	0.00951	0.20728					76	3971.06	99.95	2.28435	0.0093	2.27505
77	3972.5	99.99	0.18138	0.0089	0.17248					77	3972.67	99.99	0.56887	0.00944	0.55943
78	3971.46	99.96	0.20272	0.00903	0.19369					78	3972.67	99.99	3.15531	0.00897	3.14634
79	3973.01	100	0.16357	0.00969	0.15388					79	3973.01	100	1.19717	0.00935	1.18782
80	3973	100	0.15397	0.00912	0.14485					80	3973	100	1.63692	0.00919	1.62773
81	3971.46	99.96	0.11439	0.0094	0.10499					81	3972.35	99.98	0.74251	0.00957	0.73294
82	3970.73	99.94	0.13901	0.0094	0.12961					82	3973	100	2.56517	0.00905	2.55612
83	3969.76	99.92	0.18578	0.00916	0.17662					83	3973.01	100	2.08853	0.00916	2.07937
84	3970.41	99.93	0.17138	0.00898	0.1624					84	3972.5	99.99	0.78353	0.00963	0.7739
85	3967.84	99.87	0.14528	0.00913	0.13615					85	3972.5	99.99	3.11093	0.00958	3.10135
86	3971.06	99.95	0.10592	0.00927	0.09665					86	3972.35	99.98	1.10839	0.00885	1.09954
87	3971.46	99.96	0.18652	0.00933	0.17719					87	3972.35	99.98	3.01472	0.00922	3.0055
88	3970.95	99.95	0.10152	0.00934	0.09218					88	3973	100	2.41686	0.00907	2.40779
89	3972.67	99.99	0.19378	0.00939	0.18439					89	3972.67	99.99	3.41044	0.00926	3.40118
90	3969.12	99.9	0.11942	0.00908	0.11034					90	3972.35	99.98	2.27649	0.00924	2.26725
91	3971.98	99.97	0.1734	0.00934	0.16406					91	3972.67	99.99	2.496	0.00923	2.48677
92	3959.05	99.65	0.0981	0.00928	0.08882					92	3972.5	99.99	1.04424	0.00892	1.03532
93	3966.86	99.85	0.0664	0.0095	0.0569					93	3973	100	3.40086	0.00917	3.39169
94	3972.35	99.98	0.09861	0.00894	0.08967					94	3972.35	99.98	2.52113	0.00898	2.51215
95	3972.35	99.98	0.11446	0.00965	0.10481					95	3970.73	99.94	3.2663	0.00927	3.25703
96	3973	100	0.24013	0.00991	0.23022					96	3972.67	99.99	3.70009	0.00917	3.69092
97	3972.35	99.98	0.16956	0.00929	0.16027					97	3972.67	99.99	0.68444	0.00922	0.67522
98	3972.5	99.99	0.09021	0.01008	0.08013					98	3972.35	99.98	2.12348	0.00904	2.11444
99	3970.73	99.94	0.19511	0.00897	0.18614					99	3973	100	3.2708	0.00901	3.26179
100	3972.67	99.99	0.09371	0.00921	0.0845					100	3970.73	99.94	3.1548	0.00943	3.14537
101	3973	100	0.28096	0.00919	0.27177					101	3973.01	100	3.18889	0.00903	3.17986
102	3970.09	99.93	0.2158	0.00925	0.20655					102	3972.35	99.98	1.98546	0.00926	1.9762
103	3972.5	99.99	0.18057	0.00968	0.17089					103	3972.35	99.98	2.60587	0.00947	2.5964
104	3972.67	99.99	0.28722	0.0092	0.27802					104	3968.8	99.89	2.87143	0.00944	2.86199
105	3965.24	99.8	0.12436	0.00877	0.11559					105	3968.88	99.9	3.05888	0.0093	3.04958
106	3969.39	99.91	0.19098	0.00944	0.18154					106	3968.36	99.88	3.20386	0.00875	3.19511
107	3972.5	99.99	0.1562	0.00904	0.14716					107	3972.35	99.98	2.89469	0.00909	2.8856
108	3972.35	99.98	0.12022	0.00924	0.11098					108	3972.67	99.99	3.48138	0.00922	3.47216
109	3972.03	99.98	0.21792	0.00911	0.20881					109	3973	100	2.1272	0.00923	2.11797
110	3970.41	99.93	0.12226	0.00887	0.11339					110	3960.61	99.69	3.54023	0.00895	3.53128
111	3968.82	99.89	0.06395	0.00917	0.05478					111	3973	100	3.6895	0.00912	3.68038
112	3972.35	99.98	0.15952	0.00926	0.15026					112	3972.67	99.99	2.89669	0.00889	2.8878
113	3972.67	99.99	0.15277	0.00903	0.14374					113	3972.67	99.99	0.64077	0.00935	0.63142
114	3972.67	99.99	0.19801	0.0094	0.18861					114	3973	100	3.00514	0.00921	2.99593
115	3972.35	99.98	0.13225	0.00909	0.12316					115	3973.01	100	3.0791	0.00921	3.06989
116	3972.35	99.98	0.1824	0.00934	0.17306					116	3972.35	99.98	2.84571	0.00944	2.83627
117	3973	100	0.18623	0.0093	0.17693					117	3971.98	99.97	2.21935	0.00923	2.21012
118	3955.55	99.56	0.08944	0.00882	0.08062					118	3972.67	99.99	3.61399	0.00947	3.60452
119	3972.35	99.98	0.11813	0.00942	0.10871					119	3972.67	99.99	1.86811	0.004	1.86411
120	3970.95	99.95	0.1922	0.00935	0.18285					120	3967.5	99.86	2.6019	0.00924	2.59266
121	3973.01	100	0.12271	0.00949	0.11322					121	3972.35	99.98	1.21125	0.00913	1.20212
122	3968.36	99.88	0.11531	0.0092	0.10611					122	3972.67	99.99	3.29254	0.00971	3.28283
123	3972.5	99.99	0.28065	0.00901	0.27164					123	3971.98	99.97	1.83598	0.00941	1.82657
124	3970.41	99.93	0.1217	0.00924	0.11246					124	3973	100	1.04177	0.00894	1.03283
125	3968.15	99.88	0.12769	0.0095	0.11819					125	3973	100	2.73423	0.00925	2.72498
126	3972.35	99.98	0.16129	0.00896	0.15233					126	3972.5	99.99	1.20779	0.00928	1.19851
127	3973	100	0.12038	0.00895	0.11143					127	3971.06	99.95	2.73732	0.00917	2.72815
128	3972.5	99.99	0.18664	0.00907	0.17757					128	3973.01	100	4.2868	0.00927	4.27753
129	3970.41	99.93	0.08907	0.00951	0.07956					129	3972.35	99.98	3.52686	0.00967	3.51719
130	3967.18	99.85	0.13705	0.00906	0.12799					130	3972.67	99.99	0.81904	0.0091	0.80994
131	3961.12	99.7	0.08539	0.0089	0.07649					131	3973	100	3.32407	0.00987	3.3142
132	3966.38	99.83	0.11289	0.00903	0.10386					132	3970.73	99.94	1.39728	0.00955	1.38773
133	3966.86	99.85	0.1406	0.00905	0.13155					133	3972.67	99.99	3.7897	0.00929	3.78041
134	3973	100	0.09417	0.00921	0.08496					134	3972.5	99.99	2.43749	0.00886	2.42863
135	3969.26	99.91	0.17468	0.00911	0.16557					135	3972.67	99.99	1.64868	0.00899	1.63969
136	3972.67	99.99	0.23493	0.0093	0.22563					136	3972.35	99.98	2.49108	0.00902	2.48206
137	3972.35	99.98	0.1442	0.00889	0.13531					137	3972.35	99.98	1.83896	0.00913	1.82983
138	3972.03	99.98	0.13196	0.009	0.12296					138	3972.35	99.98	3.05398	0.00937	3.04461
139	3972.67	99.99	0.2014	0.00911	0.19229					139	3971.98	99.97	2.10832	0.00908	2.09924
140	3972.67	99.99	0.17752	0.00931	0.16821					140	3971.98	99.97	3.23721	0.00916	3.22805
141	3971.98	99.97	0.1487	0.00958	0.13912					141	3972.5	99.99	2.26641	0.00913	2.25728
142	3945.61	99.31	0.28509	0.00962	0.27547					142	3967.18	99.85	3.37917	0.00911	3.37006
143	3969.14	99.9	0.09517	0.00893	0.08624					143	3973	100	2.18954	0.00944	2.1801
144	3972.35	99.98	0.23791	0.00931	0.2286					144	3972.5	99.99	4.08815	0.00947	4.07868
145	3972.67	99.99	0.15254	0.00943	0.14311					145	3967.5	99.86	3.40739	0.00928	3.39811
146	3971.06	99.95	0.12587	0.00887	0.117					146	3973	100	3.08055	0.00946	3.07109
147	3973	100	0.17262	0.00906	0.16356					147	3973	100	1.82057	0.0091	1.81147
148	3972.67	99.99	0.11794	0.00924	0.1087					148	3972.35	99.98	3.74844	0.00924	3.7392
149	3970.73	99.94	0.15161	0.00927	0.14234					149	3970.73	99.94	3.31038	0.0092	3.30118
150	3971.46	99.96	0.11016	0.00889	0.10127					150	3972.67	99.99	0.96802	0.00919	0.95883
151	3972.67	99.99	0.36652	0.0093	0.35722					151	3970.73	99.94	2.27283	0.00902	2.26381
152	3971.98	99.97	0.20183	0.00915	0.19268					152	3972.67	99.99	2.05664	0.00945	2.04719
153	3970.43	99.94	0.19414	0.00933	0.18481					153	3970.73	99.94	3.75332	0.00925	3.74407
154	3973	100	0.39782	0.0094	0.38842					154	3972.35	99.98	2.03123	0.00937	2.02186
155	3972.67	99.99	0.13615	0.00961	0.12654					155	3972.35	99.98	4.3103	0.00926	4.30104
156	3970.73	99.94	0.15605	0.00921	0.14684					156	3972.35	99.98	2.50685	0.00943	2.49742
157	3972.67	99.99	0.29045	0.00938	0.28107					157	3972.5	99.99	3.69163	0.00905	3.68258
158	3970.73	99.94	0.16168	0.00977	0.15191					158	3973	100	2.73512	0.00919	2.72593
159	3970.73	99.94	0.12011	0.00886	0.11125					159	3972.35	99.98	1.67485	0.00929	1.66556
160	3972.67	99.99	0.1112	0.00936	0.10184					160	3972.35	99.98	3.12437	0.00922	3.11515
161	3970.73	99.94	0.14501	0.00938	0.13563					161	3972.67	99.99	0.9917	0.00893	0.98277
162	3968.36	99.88	0.13085	0.00957	0.12128					162	3973.01	100	2.36671	0.00948	2.35723
163	3972.67	99.99	0.18037	0.00926	0.17111					163	3971.98	99.97	1.8852	0.00902	1.87618
164	3967.97	99.87	0.08452	0.00976	0.07476					164	3973	100	3.00831	0.00963	2.99868
165	3972.35	99.98	0.20915	0.00904	0.20011					165	3973.01	100	4.0731	0.00932	4.06378
166	3971.98	99.97	0.13519	0.00938	0.12581					166	3970.09	99.93	3.45009	0.00975	3.44034
167	3972.35	99.98	0.23116	0.00915	0.22201					167	3972.67	99.99	3.56907	0.0092	3.55987
168	3966.29	99.83	0.4763	0.0094	0.4669					168	3972.67	99.99	2.49078	0.00956	2.48122
169	3973	100	0.16596	0.00916	0.1568					169	3972.35	99.98	3.55188	0.00937	3.54251
170	3971.46	99.96	0.09382	0.00913	0.08469					170	3972.67	99.99	2.92555	0.00907	2.91648
171	3959.22	99.65	0.11928	0.00928	0.11					171	3972.5	99.99	1.89476	0.0094	1.88536
172	3971.85	99.97	0.23833	0.00919	0.22914					172	3972.5	99.99	1.77473	0.00908	1.76565
173	3972.67	99.99	0.07279	0.00893	0.06386					173	3972.03	99.98	2.55358	0.00974	2.54384
174	3972.35	99.98	0.21092	0.00892	0.202					174	3973.01	100	3.03842	0.00951	3.02891
175	3968.8	99.89	0.12131	0.00901	0.1123					175	3971.98	99.97	3.10054	0.00897	3.09157
176	3968.36	99.88	0.18193	0.00905	0.17288					176	3972.5	99.99	2.9553	0.00925	2.94605
177	3972.35	99.98	0.10617	0.00964	0.09653					177	3971.46	99.96	3.9361	0.004	3.9321
178	3970.09	99.93	0.20634	0.00956	0.19678					178	3967.18	99.85	2.94756	0.00907	2.93849
179	3972.03	99.98	0.32151	0.00899	0.31252					179	3971.46	99.96	3.4818	0.00963	3.47217
180	3969.12	99.9	0.16708	0.00923	0.15785					180	3973.01	100	1.51472	0.00915	1.50557
181	3972.67	99.99	0.13118	0.00952	0.12166					181	3973	100	0.80354	0.00914	0.7944
182	3972.67	99.99	0.10199	0.00979	0.0922					182	3973	100	2.35256	0.00886	2.3437
183	3972.35	99.98	0.14772	0.00934	0.13838					183	3972.67	99.99	2.6183	0.00932	2.60898
184	3973	100	0.12744	0.00945	0.11799					184	3968.88	99.9	2.56909	0.00919	2.5599
185	3972.67	99.99	0.11429	0.00966	0.10463					185	3972.5	99.99	3.80823	0.009	3.79923
186	3972.03	99.98	0.10578	0.00926	0.09652					186	3973	100	2.33387	0.00887	2.325
187	3973	100	0.1541	0.009	0.1451					187	3972.5	99.99	3.08825	0.00918	3.07907
188	3973.01	100	0.189	0.004	0.185					188	3973	100	1.91981	0.00892	1.91089
189	3972.67	99.99	0.13503	0.00936	0.12567					189	3967.5	99.86	2.49877	0.00904	2.48973
190	3970.73	99.94	0.20779	0.00942	0.19837					190	3973	100	3.71776	0.00893	3.70883
191	3972.5	99.99	0.14847	0.00911	0.13936					191	3970.09	99.93	4.50777	0.00942	4.49835
192	3972.5	99.99	0.16546	0.00918	0.15628					192	3973	100	3.05695	0.00912	3.04783
193	3970.73	99.94	0.16377	0.00942	0.15435					193	3972.5	99.99	1.01417	0.00913	1.00504
194	3971.46	99.96	0.1949	0.00924	0.18566					194	3971.06	99.95	3.72907	0.00922	3.71985
195	3972.5	99.99	0.18467	0.00934	0.17533					195	3972.03	99.98	1.40048	0.00907	1.39141
196	3972.35	99.98	0.17966	0.00919	0.17047					196	3968.8	99.89	2.88695	0.00893	2.87802
197	3973.01	100	0.19842	0.00898	0.18944					197	3972.35	99.98	3.19335	0.00931	3.18404
198	3973	100	0.21343	0.00928	0.20415					198	3973	100	2.43766	0.00904	2.42862
199	3972.67	99.99	0.1551	0.0089	0.1462					199	3972.5	99.99	2.20009	0.00948	2.19061
200	3965.78	99.82	0.12218	0.00946						200	3973	100	2.3409	0.00914	2.33176

## Sheet: 08_HCFACO_Seeds(225)
Fast Converegnce Exp							Fast Converegnce Exp			Slow Converegnce Exp							Slow Converegnce Exp
#	CBLF	Quality	Taumax	Taumin	DeltaTauminmax		Global Optimal Solution =	3973.01		#	CBLF	Quality	Taumax	Taumin	DeltaTauminmax		Global Optimal Solution =	3973.01
1	3973	100	0.18587	0.00921	0.17666		Minimum Optimal Solution =	3940.96		1	3973	100	2.5702	0.00921	2.56099		Minimum Optimal Solution =	3961.69
2	3972.67	99.99	0.16967	0.0092	0.16047		Mean of Optimal Solution =	3970.46		2	3972.67	99.99	3.45148	0.00903	3.44245		Mean of Optimal Solution =	3971.9
3	3968.82	99.89	0.1272	0.00971	0.11749		Median of Optimal Solution=	3970.46		3	3972.5	99.99	3.28868	0.00931	3.27937		Median of Optimal Solution =	3971.9
4	3972.35	99.98	0.15608	0.00908	0.147		Solution Standrad Deviation =	3.7639		4	3973	100	3.04724	0.00944	3.0378		Solution Standrad Deviation =	1.896
5	3971.52	99.96	0.15766	0.00927	0.14839		Average Price =	28.19		5	3972.35	99.98	2.61009	0.00899	2.6011		Average Price =	86.635
6	3968.88	99.9	0.08853	0.00939	0.07914		Relability =	78		6	3973	100	2.56191	0.00917	2.55274		Relability =	90.5
7	3970.23	99.93	0.15336	0.00911	0.14425		Normalized Price =	36.141		7	3972.67	99.99	3.1267	0.00888	3.11782		Normalized Price =	95.7293
8	3973	100	0.12308	0.00926	0.11382		Average Solution Quality =	99.9358		8	3973.01	100	3.44316	0.00893	3.43423		Average Solution Quality =	99.9721
9	3967.82	99.87	0.14283	0.00912	0.13371		Average FDC =	-134.929		9	3972.5	99.99	3.73562	0.00932	3.7263		Average FDC =	-58.0741
10	3972.67	99.99	0.19518	0.0096	0.18558		Correlation Coefficent =	-0.68335		10	3972.35	99.98	3.00225	0.00957	2.99268		Correlation Coefficent =	-1
11	3972.67	99.99	0.19615	0.00941	0.18674		Solution Robustness =	1054.89		11	3972.5	99.99	3.54644	0.00936	3.53708		Solution Robustness =	2094.84
12	3972.67	99.99	0.12022	0.00894	0.11128		Performance Rate =	0.027669		12	3973.01	100	2.32167	0.00878	2.31289		Performance Rate =	0.010446
13	3972.17	99.98	0.16983	0.00944	0.16039		Average Elapsed Time =	1.3641		13	3972.67	99.99	1.31167	0.0094	1.30227		Average Elapsed Time =	4.0302
14	3973.01	100	0.19358	0.00988	0.1837					14	3972.67	99.99	1.03274	0.00928	1.02346
15	3971.06	99.95	0.15274	0.00932	0.14342					15	3972.67	99.99	1.64462	0.00903	1.63559
16	3972.35	99.98	0.13751	0.00939	0.12812					16	3972.35	99.98	1.68518	0.00889	1.67629
17	3972.67	99.99	0.12629	0.00948	0.11681					17	3973	100	2.64012	0.00914	2.63098
18	3972.35	99.98	0.15269	0.00913	0.14356					18	3972.35	99.98	2.19973	0.00913	2.1906
19	3972.67	99.99	0.15169	0.00895	0.14274					19	3973.01	100	2.65641	0.0092	2.64721
20	3972.67	99.99	0.11839	0.00911	0.10928					20	3972.35	99.98	1.58905	0.00965	1.5794
21	3955.55	99.56	0.08823	0.0093	0.07893					21	3972.67	99.99	2.03973	0.0091	2.03063
22	3971.98	99.97	0.2056	0.00931	0.19629					22	3973	100	2.24535	0.00911	2.23624
23	3966.21	99.83	0.20226	0.0097	0.19256					23	3972.67	99.99	1.8091	0.00947	1.79963
24	3971.46	99.96	0.158	0.00922	0.14878					24	3972.35	99.98	2.72934	0.00915	2.72019
25	3972.35	99.98	0.16096	0.00909	0.15187					25	3972.35	99.98	1.7339	0.00898	1.72492
26	3967.84	99.87	0.14726	0.00961	0.13765					26	3971.98	99.97	2.00116	0.00906	1.9921
27	3972.35	99.98	0.2437	0.00899	0.23471					27	3972.67	99.99	1.88795	0.0093	1.87865
28	3972.35	99.98	0.16691	0.0095	0.15741					28	3973.01	100	0.89737	0.00918	0.88819
29	3972.35	99.98	0.19305	0.0091	0.18395					29	3972.67	99.99	1.05629	0.00956	1.04673
30	3966.53	99.84	0.17359	0.00894	0.16465					30	3972.35	99.98	3.69913	0.00933	3.6898
31	3972.35	99.98	0.14374	0.00932	0.13442					31	3973.01	100	1.37655	0.00969	1.36686
32	3958.13	99.63	0.1687	0.00935	0.15935					32	3973.01	100	3.06125	0.00932	3.05193
33	3972.35	99.98	0.1943	0.00929	0.18501					33	3971.98	99.97	3.33878	0.00922	3.32956
34	3969.39	99.91	0.1572	0.00898	0.14822					34	3972.35	99.98	2.52757	0.00928	2.51829
35	3971.98	99.97	0.16464	0.00901	0.15563					35	3972.5	99.99	2.60063	0.00936	2.59127
36	3968.29	99.88	0.09761	0.00939	0.08822					36	3968.88	99.9	2.77357	0.00924	2.76433
37	3972.35	99.98	0.23486	0.00871	0.22615					37	3972.67	99.99	1.76249	0.00935	1.75314
38	3972.5	99.99	0.14292	0.0096	0.13332					38	3971.06	99.95	3.22008	0.00929	3.21079
39	3968.88	99.9	0.07776	0.00928	0.06848					39	3967.18	99.85	2.94226	0.0093	2.93296
40	3972.03	99.98	0.1612	0.00928	0.15192					40	3972.67	99.99	2.53607	0.00938	2.52669
41	3953.37	99.51	0.09401	0.00899	0.08502					41	3972.35	99.98	3.31502	0.00901	3.30601
42	3966.29	99.83	0.24963	0.00912	0.24051					42	3972.67	99.99	0.72335	0.00897	0.71438
43	3971.52	99.96	0.1009	0.0091	0.0918					43	3972.67	99.99	2.58775	0.00955	2.5782
44	3971.06	99.95	0.17317	0.00945	0.16372					44	3973	100	0.87414	0.00903	0.86511
45	3969.44	99.91	0.16913	0.00958	0.15955					45	3971.98	99.97	1.45655	0.00927	1.44728
46	3971.06	99.95	0.07701	0.00973	0.06728					46	3972.35	99.98	1.80828	0.00986	1.79842
47	3972.35	99.98	0.12346	0.00933	0.11413					47	3972.35	99.98	1.48386	0.00921	1.47465
48	3973	100	0.1904	0.00954	0.18086					48	3972.35	99.98	2.19269	0.00907	2.18362
49	3972.03	99.98	0.23235	0.00923	0.22312					49	3973.01	100	2.6613	0.00939	2.65191
50	3972.67	99.99	0.21094	0.00898	0.20196					50	3972.35	99.98	2.93257	0.0093	2.92327
51	3971.85	99.97	0.11919	0.00901	0.11018					51	3969.44	99.91	3.01329	0.00907	3.00422
52	3966.21	99.83	0.06818	0.00922	0.05896					52	3973.01	100	1.16792	0.00902	1.1589
53	3972.35	99.98	0.09384	0.004	0.08984					53	3972.35	99.98	2.82538	0.004	2.82138
54	3973	100	0.14237	0.00943	0.13294					54	3973	100	0.66191	0.00915	0.65276
55	3972.5	99.99	0.30994	0.00896	0.30098					55	3973.01	100	2.63659	0.00964	2.62695
56	3971.46	99.96	0.11051	0.00891	0.1016					56	3969.12	99.9	3.09362	0.00921	3.08441
57	3973.01	100	0.16781	0.00927	0.15854					57	3972.5	99.99	2.79355	0.00932	2.78423
58	3965.78	99.82	0.08379	0.00926	0.07453					58	3972.35	99.98	3.44731	0.00945	3.43786
59	3968.8	99.89	0.13593	0.00906	0.12687					59	3968.36	99.88	2.43078	0.00903	2.42175
60	3972.67	99.99	0.2307	0.00891	0.22179					60	3973	100	2.02752	0.00909	2.01843
61	3967.5	99.86	0.14346	0.00928	0.13418					61	3972.5	99.99	2.05041	0.00892	2.04149
62	3970.09	99.93	0.13907	0.00917	0.1299					62	3972.35	99.98	0.5471	0.00924	0.53786
63	3971.46	99.96	0.15203	0.00965	0.14238					63	3973	100	2.04812	0.00901	2.03911
64	3972.67	99.99	0.19355	0.00905	0.1845					64	3972.67	99.99	0.64049	0.00925	0.63124
65	3972.35	99.98	0.17815	0.00945	0.1687					65	3967.5	99.86	3.22315	0.00954	3.21361
66	3940.96	99.19	0.07742	0.00901	0.06841					66	3969.39	99.91	3.50323	0.00892	3.49431
67	3972.67	99.99	0.22827	0.00904	0.21923					67	3972.35	99.98	2.7274	0.00903	2.71837
68	3971.85	99.97	0.14877	0.00899	0.13978					68	3972.03	99.98	1.72456	0.0093	1.71526
69	3972.67	99.99	0.17672	0.00927	0.16745					69	3967.5	99.86	3.40958	0.00947	3.40011
70	3972.35	99.98	0.21438	0.00915	0.20523					70	3972.35	99.98	3.19372	0.00906	3.18466
71	3969.76	99.92	0.1438	0.00911	0.13469					71	3973.01	100	1.33192	0.00919	1.32273
72	3972.67	99.99	0.12876	0.00934	0.11942					72	3972.67	99.99	2.92756	0.00924	2.91832
73	3968.61	99.89	0.09413	0.00897	0.08516					73	3972.35	99.98	4.11885	0.00955	4.1093
74	3972.35	99.98	0.12806	0.00911	0.11895					74	3971.46	99.96	1.37583	0.00928	1.36655
75	3961.68	99.71	0.17288	0.00932	0.16356					75	3972.35	99.98	2.3571	0.00933	2.34777
76	3972.35	99.98	0.19354	0.0095	0.18404					76	3973.01	100	3.19246	0.00922	3.18324
77	3971.98	99.97	0.13594	0.00958	0.12636					77	3972.5	99.99	3.05072	0.00951	3.04121
78	3971.98	99.97	0.17184	0.00939	0.16245					78	3972.5	99.99	2.59003	0.00914	2.58089
79	3971.46	99.96	0.18816	0.00916	0.179					79	3971.98	99.97	3.07556	0.00922	3.06634
80	3972.03	99.98	0.1765	0.009	0.1675					80	3973	100	1.67205	0.0094	1.66265
81	3971.98	99.97	0.24101	0.00936	0.23165					81	3972.67	99.99	0.57758	0.00902	0.56856
82	3970.73	99.94	0.17191	0.00906	0.16285					82	3961.68	99.71	2.11317	0.00915	2.10402
83	3970.41	99.93	0.13476	0.00943	0.12533					83	3972.67	99.99	2.99637	0.00934	2.98703
84	3972.67	99.99	0.12798	0.00897	0.11901					84	3972.67	99.99	3.22518	0.00906	3.21612
85	3973	100	0.19906	0.00899	0.19007					85	3973	100	2.89987	0.0089	2.89097
86	3967.2	99.85	0.23502	0.00891	0.22611					86	3973	100	2.83374	0.00923	2.82451
87	3973.01	100	0.13937	0.00901	0.13036					87	3972.67	99.99	3.39052	0.00985	3.38067
88	3968.88	99.9	0.11233	0.00908	0.10325					88	3971.98	99.97	3.44482	0.00904	3.43578
89	3972.35	99.98	0.26677	0.00934	0.25743					89	3965.24	99.8	4.04154	0.00975	4.03179
90	3970.73	99.94	0.10485	0.004	0.10085					90	3972.35	99.98	3.06545	0.0094	3.05605
91	3971.46	99.96	0.209	0.00928	0.19972					91	3973.01	100	2.69239	0.004	2.68839
92	3972.49	99.99	0.12402	0.00953	0.11449					92	3972.5	99.99	3.85342	0.00904	3.84438
93	3967.33	99.86	0.15651	0.00939	0.14712					93	3972.67	99.99	2.52877	0.00966	2.51911
94	3972.35	99.98	0.23228	0.00953	0.22275					94	3972.35	99.98	2.97544	0.00967	2.96577
95	3973	100	0.15155	0.00913	0.14242					95	3968.36	99.88	3.53639	0.00936	3.52703
96	3973	100	0.19544	0.00896	0.18648					96	3973.01	100	3.04121	0.00908	3.03213
97	3962.8	99.74	0.17034	0.00917	0.16117					97	3970.73	99.94	2.71318	0.00918	2.704
98	3971.46	99.96	0.11719	0.00939	0.1078					98	3972.67	99.99	3.93541	0.00923	3.92618
99	3970.95	99.95	0.13112	0.00915	0.12197					99	3972.67	99.99	1.67651	0.00922	1.66729
100	3969.39	99.91	0.24579	0.00924	0.23655					100	3972.35	99.98	1.2775	0.00932	1.26818
101	3968.88	99.9	0.10803	0.00893	0.0991					101	3973.01	100	2.90624	0.0093	2.89694
102	3972.67	99.99	0.12378	0.00931	0.11447					102	3970.73	99.94	2.46897	0.00936	2.45961
103	3972.67	99.99	0.21184	0.0096	0.20224					103	3968.36	99.88	3.99192	0.00946	3.98246
104	3973	100	0.23364	0.00901	0.22463					104	3968.88	99.9	1.87574	0.00938	1.86636
105	3966.86	99.85	0.09361	0.00945	0.08416					105	3973	100	3.30096	0.00933	3.29163
106	3971.98	99.97	0.15729	0.00934	0.14795					106	3973.01	100	4.3506	0.00949	4.34111
107	3973	100	0.17976	0.00944	0.17032					107	3972.67	99.99	4.07974	0.00933	4.07041
108	3970.09	99.93	0.18763	0.0093	0.17833					108	3972.67	99.99	1.97245	0.0095	1.96295
109	3970.95	99.95	0.12173	0.00897	0.11276					109	3972.67	99.99	0.95127	0.00965	0.94162
110	3970.73	99.94	0.2034	0.0093	0.1941					110	3972.5	99.99	3.19532	0.00926	3.18606
111	3971.46	99.96	0.15709	0.00955	0.14754					111	3973.01	100	1.24848	0.0093	1.23918
112	3960.09	99.67	0.10684	0.00918	0.09766					112	3972.67	99.99	2.98504	0.00946	2.97558
113	3971.85	99.97	0.14368	0.00925	0.13443					113	3973	100	1.42988	0.00883	1.42105
114	3964.59	99.79	0.111	0.00885	0.10215					114	3972.5	99.99	1.42757	0.004	1.42357
115	3973	100	0.139	0.0095	0.1295					115	3973	100	3.71213	0.00898	3.70315
116	3966.21	99.83	0.18023	0.00907	0.17116					116	3973.01	100	0.94167	0.00926	0.93241
117	3968.8	99.89	0.16094	0.00925	0.15169					117	3973	100	2.74642	0.00934	2.73708
118	3971.98	99.97	0.25796	0.00916	0.2488					118	3973.01	100	3.90007	0.004	3.89607
119	3970.95	99.95	0.10203	0.00959	0.09244					119	3972.67	99.99	2.27343	0.00922	2.26421
120	3969.39	99.91	0.17375	0.00924	0.16451					120	3972.5	99.99	3.20568	0.00913	3.19655
121	3972.35	99.98	0.22998	0.00919	0.22079					121	3973	100	2.16509	0.0091	2.15599
122	3971.85	99.97	0.09328	0.00951	0.08377					122	3972.67	99.99	2.51801	0.00934	2.50867
123	3972.17	99.98	0.1577	0.00912	0.14858					123	3972.35	99.98	2.47899	0.00916	2.46983
124	3972.67	99.99	0.11167	0.00926	0.10241					124	3967.18	99.85	2.6162	0.00925	2.60695
125	3972.35	99.98	0.21418	0.00924	0.20494					125	3973.01	100	1.59447	0.00915	1.58532
126	3969.44	99.91	0.13298	0.00903	0.12395					126	3972.35	99.98	4.29438	0.004	4.29038
127	3972.67	99.99	0.07674	0.00906	0.06768					127	3972.35	99.98	2.06708	0.00928	2.0578
128	3968.88	99.9	0.11934	0.00905	0.11029					128	3973.01	100	3.01997	0.00955	3.01042
129	3968.88	99.9	0.12791	0.00943	0.11848					129	3969.12	99.9	3.10569	0.0097	3.09599
130	3972.67	99.99	0.14464	0.00905	0.13559					130	3973	100	3.40714	0.00947	3.39767
131	3967.84	99.87	0.09434	0.00904	0.0853					131	3972.35	99.98	2.67689	0.00921	2.66768
132	3972.5	99.99	0.18444	0.00926	0.17518					132	3973	100	3.03619	0.00912	3.02707
133	3971.7	99.97	0.18658	0.00941	0.17717					133	3972.67	99.99	2.37532	0.009	2.36632
134	3973	100	0.28945	0.00931	0.28014					134	3971.46	99.96	1.82435	0.0094	1.81495
135	3972.67	99.99	0.14779	0.00908	0.13871					135	3973	100	2.78471	0.00922	2.77549
136	3972.67	99.99	0.12427	0.00897	0.1153					136	3972.67	99.99	2.99065	0.00912	2.98153
137	3973.01	100	0.11717	0.00939	0.10778					137	3968.88	99.9	3.21207	0.00917	3.2029
138	3970.41	99.93	0.17206	0.00923	0.16283					138	3972.35	99.98	3.24027	0.00962	3.23065
139	3970.09	99.93	0.26068	0.0096	0.25108					139	3972.35	99.98	2.14798	0.00929	2.13869
140	3971.7	99.97	0.1831	0.00913	0.17397					140	3972.35	99.98	3.5958	0.00894	3.58686
141	3966.86	99.85	0.20466	0.00983	0.19483					141	3972.35	99.98	3.49203	0.0089	3.48313
142	3973	100	0.14837	0.00914	0.13923					142	3968.88	99.9	2.16969	0.00901	2.16068
143	3971.98	99.97	0.0967	0.00974	0.08696					143	3972.35	99.98	2.71403	0.00894	2.70509
144	3970.41	99.93	0.11083	0.00936	0.10147					144	3972.67	99.99	0.98655	0.00943	0.97712
145	3968.36	99.88	0.21506	0.00905	0.20601					145	3972.35	99.98	2.16167	0.00916	2.15251
146	3970.73	99.94	0.13282	0.00868	0.12414					146	3973.01	100	1.72418	0.00942	1.71476
147	3970.73	99.94	0.10657	0.00929	0.09728					147	3971.06	99.95	0.76095	0.00926	0.75169
148	3972.67	99.99	0.18328	0.009	0.17428					148	3969.12	99.9	1.60727	0.00932	1.59795
149	3972.67	99.99	0.13075	0.00906	0.12169					149	3972.67	99.99	3.00499	0.00938	2.99561
150	3971.98	99.97	0.07668	0.00918	0.0675					150	3972.35	99.98	1.81482	0.00929	1.80553
151	3970.41	99.93	0.07636	0.00912	0.06724					151	3962.67	99.74	3.72101	0.00884	3.71217
152	3964.59	99.79	0.1067	0.00887	0.09783					152	3973	100	2.72544	0.00903	2.71641
153	3973	100	0.15054	0.0093	0.14124					153	3972.5	99.99	3.90218	0.00919	3.89299
154	3971.98	99.97	0.12313	0.00903	0.1141					154	3972.5	99.99	3.10638	0.00934	3.09704
155	3972.67	99.99	0.17032	0.00914	0.16118					155	3972.67	99.99	3.22859	0.00898	3.21961
156	3972.67	99.99	0.13494	0.00935	0.12559					156	3973.01	100	2.84273	0.00957	2.83316
157	3962.98	99.75	0.08816	0.00913	0.07903					157	3968.88	99.9	3.71317	0.00896	3.70421
158	3972.35	99.98	0.13037	0.00917	0.1212					158	3972.5	99.99	2.34648	0.00896	2.33752
159	3972.67	99.99	0.18976	0.00897	0.18079					159	3971.46	99.96	2.59074	0.00916	2.58158
160	3972.5	99.99	0.10804	0.00892	0.09912					160	3967.5	99.86	2.25248	0.00889	2.24359
161	3968.82	99.89	0.11842	0.00903	0.10939					161	3973.01	100	2.3594	0.00898	2.35042
162	3971.98	99.97	0.21644	0.00972	0.20672					162	3972.03	99.98	1.39906	0.00919	1.38987
163	3973	100	0.21198	0.00889	0.20309					163	3971.46	99.96	3.23739	0.00901	3.22838
164	3973	100	0.21153	0.00912	0.20241					164	3966.86	99.85	3.06281	0.00993	3.05288
165	3970.95	99.95	0.12628	0.00932	0.11696					165	3972.35	99.98	2.8374	0.00935	2.82805
166	3967.84	99.87	0.07688	0.00947	0.06741					166	3973	100	1.94921	0.00871	1.9405
167	3972.03	99.98	0.1224	0.00906	0.11334					167	3973	100	0.89151	0.0093	0.88221
168	3972.03	99.98	0.14684	0.00929	0.13755					168	3970.41	99.93	3.71305	0.00918	3.70387
169	3972.67	99.99	0.10148	0.004	0.09748					169	3970.73	99.94	3.67253	0.00916	3.66337
170	3970.09	99.93	0.11094	0.00955	0.10139					170	3971.98	99.97	2.33574	0.0089	2.32684
171	3970.43	99.94	0.11886	0.00878	0.11008					171	3964.92	99.8	4.03844	0.004	4.03444
172	3962.77	99.74	0.09832	0.00894	0.08938					172	3972.67	99.99	0.90223	0.009	0.89323
173	3972.03	99.98	0.17017	0.00984	0.16033					173	3972.03	99.98	2.24099	0.00898	2.23201
174	3970.95	99.95	0.07174	0.00944	0.0623					174	3973	100	2.85372	0.00932	2.8444
175	3971.06	99.95	0.10669	0.004	0.10269					175	3972.5	99.99	1.53607	0.00991	1.52616
176	3973.01	100	0.17438	0.00907	0.16531					176	3973	100	0.99085	0.00873	0.98212
177	3971.85	99.97	0.06235	0.0091	0.05325					177	3972.35	99.98	2.63778	0.00937	2.62841
178	3972.35	99.98	0.14368	0.00979	0.13389					178	3972.35	99.98	2.22502	0.00919	2.21583
179	3970.73	99.94	0.14085	0.00917	0.13168					179	3972.35	99.98	3.60121	0.00911	3.5921
180	3970.41	99.93	0.08069	0.00919	0.0715					180	3973.01	100	3.21266	0.00881	3.20385
181	3968.36	99.88	0.10531	0.00909	0.09622					181	3972.5	99.99	2.67677	0.00927	2.6675
182	3971.46	99.96	0.1309	0.00967	0.12123					182	3972.35	99.98	2.82384	0.0089	2.81494
183	3972.67	99.99	0.19057	0.00918	0.18139					183	3972.67	99.99	1.90655	0.00952	1.89703
184	3969.91	99.92	0.17056	0.00941	0.16115					184	3971.98	99.97	4.18219	0.00914	4.17305
185	3971.06	99.95	0.13881	0.00926	0.12955					185	3969.39	99.91	3.06381	0.00943	3.05438
186	3973.01	100	0.12805	0.00891	0.11914					186	3972.67	99.99	3.62845	0.00935	3.6191
187	3965.78	99.82	0.13137	0.00937	0.122					187	3973	100	1.30901	0.00935	1.29966
188	3968.88	99.9	0.09328	0.00933	0.08395					188	3971.98	99.97	0.81147	0.00939	0.80208
189	3972.03	99.98	0.22905	0.00952	0.21953					189	3973	100	3.16169	0.00894	3.15275
190	3972.03	99.98	0.26527	0.00919	0.25608					190	3972.67	99.99	1.61286	0.00921	1.60365
191	3973	100	0.14362	0.00924	0.13438					191	3973.01	100	2.1232	0.00928	2.11392
192	3969.39	99.91	0.15558	0.00928	0.1463					192	3972.5	99.99	3.56134	0.0091	3.55224
193	3970.41	99.93	0.19302	0.0092	0.18382					193	3972.67	99.99	1.25039	0.00901	1.24138
194	3972.67	99.99	0.11215	0.0092	0.10295					194	3963.62	99.76	4.27836	0.00895	4.26941
195	3972.35	99.98	0.12161	0.00968	0.11193					195	3972.67	99.99	2.24668	0.00906	2.23762
196	3971.98	99.97	0.16166	0.00957	0.15209					196	3972.67	99.99	2.51317	0.00935	2.50382
197	3962.67	99.74	0.09319	0.00947	0.08372					197	3972.67	99.99	2.25541	0.00909	2.24632
198	3962.98	99.75	0.11545	0.00903	0.10642					198	3971.98	99.97	2.50447	0.00929	2.49518
199	3969.12	99.9	0.16353	0.0094	0.15413					199	3971.98	99.97	3.08575	0.00937	3.07638
200	3972.35	99.98	0.12209	0.00915	0.11294					200	3972.35	99.98	1.29185	0.00902	1.28283

## Sheet: 09_HCFACO_Seeds(11)
Fast Converegnce Exp							Fast Converegnce Exp			Slow Converegnce Exp							Slow Converegnce Exp
#	CBLF	Quality	Taumax	Taumin	DeltaTauminmax		Global Optimal Solution =	3973.01		#	CBLF	Quality	Taumax	Taumin	DeltaTauminmax		Global Optimal Solution =	3973.01
1	3972.67	99.99	0.18893	0.00954	0.17939		Minimum Optimal Solution =	3949.75		1	3972.67	99.99	2.90973	0.00954	2.90019		Minimum Optimal Solution =	3959.75
2	3971.46	99.96	0.14068	0.004	0.13668		Mean of Optimal Solution =	3970.32		2	3972.5	99.99	2.7477	0.00926	2.73844		Mean of Optimal Solution =	3971.84
3	3972.35	99.98	0.15626	0.00941	0.14685		Median of Optimal Solution =	3970.32		3	3972.67	99.99	0.48438	0.00943	0.47495		Median of Optimal Solution =	3971.84
4	3963.62	99.76	0.11954	0.00894	0.1106		Solution Standrad Deviation =	3.8341		4	3972.5	99.99	1.72761	0.00954	1.71807		Solution Standrad Deviation =	2.2872
5	3971.46	99.96	0.08103	0.00919	0.07184		Average Price =	27.615		5	3972.5	99.99	1.27441	0.00968	1.26473		Average Price =	89.85
6	3972.67	99.99	0.19568	0.00908	0.1866		Relability =	78.5		6	3973	100	3.83543	0.00937	3.82606		Relability =	91.5
7	3965.26	99.8	0.11507	0.00964	0.10543		Normalized Price =	35.1783		7	3972.67	99.99	1.32816	0.00896	1.3192		Normalized Price =	98.1967
8	3972.35	99.98	0.16909	0.00945	0.15964		Average Solution Quality =	99.9324		8	3972.35	99.98	2.3566	0.00881	2.34779		Average Solution Quality =	99.9705
9	3971.98	99.97	0.18166	0.00893	0.17273		Average FDC =	-135.436		9	3973.01	100	1.68518	0.00909	1.67609		Average FDC =	-57.9399
10	3969.39	99.91	0.18959	0.00922	0.18037		Correlation Coefficent =	-0.66527		10	3973.01	100	1.82449	0.00919	1.8153		Correlation Coefficent =	-0.68261
11	3960.83	99.69	0.14809	0.00921	0.13888		Solution Robustness =	1035.53		11	3963.71	99.77	4.11948	0.0092	4.11028		Solution Robustness =	1736.53
12	3965.78	99.82	0.08136	0.00925	0.07211		Performance Rate =	0.028427		12	3972.67	99.99	2.57714	0.00936	2.56778		Performance Rate =	0.010184
13	3955.8	99.57	0.07292	0.00919	0.06373		Average Elapsed Time =	1.2874		13	3972.67	99.99	1.04317	0.00921	1.03396		Average Elapsed Time =	4.2019
14	3971.98	99.97	0.1221	0.00899	0.11311					14	3972.35	99.98	1.51922	0.00916	1.51006
15	3972.67	99.99	0.30224	0.0099	0.29234					15	3972.5	99.99	2.92275	0.00959	2.91316
16	3973	100	0.23404	0.00913	0.22491					16	3972.67	99.99	2.08245	0.00937	2.07308
17	3972.67	99.99	0.15048	0.0093	0.14118					17	3962.98	99.75	3.52345	0.004	3.51945
18	3970.41	99.93	0.12767	0.004	0.12367					18	3972.35	99.98	2.03203	0.00938	2.02265
19	3953.37	99.51	0.22576	0.00917	0.21659					19	3972.67	99.99	2.62235	0.0097	2.61265
20	3970.41	99.93	0.1562	0.00908	0.14712					20	3972.5	99.99	2.13485	0.00904	2.12581
21	3972.67	99.99	0.22574	0.00919	0.21655					21	3973.01	100	2.12702	0.00916	2.11786
22	3972.5	99.99	0.20252	0.009	0.19352					22	3972.5	99.99	2.50876	0.00918	2.49958
23	3972.03	99.98	0.09763	0.00891	0.08872					23	3972.67	99.99	2.87482	0.009	2.86582
24	3972.5	99.99	0.15556	0.00915	0.14641					24	3968.36	99.88	3.78027	0.00902	3.77125
25	3966.53	99.84	0.08907	0.00905	0.08002					25	3973.01	100	3.52786	0.00913	3.51873
26	3971.46	99.96	0.0937	0.00914	0.08456					26	3972.5	99.99	2.75406	0.00906	2.745
27	3972.5	99.99	0.07652	0.00903	0.06749					27	3968.88	99.9	3.26388	0.00917	3.25471
28	3967.18	99.85	0.15556	0.00943	0.14613					28	3973.01	100	2.19378	0.00924	2.18454
29	3972.35	99.98	0.24674	0.00922	0.23752					29	3971.98	99.97	2.11508	0.0093	2.10578
30	3972.35	99.98	0.16115	0.00895	0.1522					30	3972.67	99.99	3.41412	0.00913	3.40499
31	3972.5	99.99	0.1352	0.00916	0.12604					31	3972.35	99.98	2.77366	0.00966	2.764
32	3970.73	99.94	0.10275	0.00936	0.09339					32	3973	100	2.03297	0.0091	2.02387
33	3972.35	99.98	0.22849	0.00933	0.21916					33	3972.67	99.99	3.27451	0.00914	3.26537
34	3969.14	99.9	0.11476	0.00941	0.10535					34	3972.67	99.99	4.19937	0.00911	4.19026
35	3972.03	99.98	0.16771	0.00995	0.15776					35	3970.73	99.94	1.32043	0.00933	1.3111
36	3972.35	99.98	0.13141	0.00942	0.12199					36	3972.67	99.99	1.54317	0.00925	1.53392
37	3972.67	99.99	0.18594	0.00902	0.17692					37	3973	100	0.93405	0.00929	0.92476
38	3973	100	0.107	0.00917	0.09783					38	3972.35	99.98	2.91986	0.00896	2.9109
39	3969.44	99.91	0.11008	0.00904	0.10104					39	3972.5	99.99	0.8872	0.0092	0.878
40	3968.36	99.88	0.14409	0.00902	0.13507					40	3973	100	2.56209	0.00917	2.55292
41	3969.26	99.91	0.11497	0.00912	0.10585					41	3973	100	3.17105	0.00919	3.16186
42	3968.36	99.88	0.12691	0.00949	0.11742					42	3972.67	99.99	2.78573	0.00938	2.77635
43	3972.5	99.99	0.19454	0.00901	0.18553					43	3972.67	99.99	2.93752	0.0089	2.92862
44	3966.86	99.85	0.19123	0.00918	0.18205					44	3970.09	99.93	2.02342	0.0095	2.01392
45	3972.35	99.98	0.17552	0.00893	0.16659					45	3973.01	100	0.73993	0.00973	0.7302
46	3971.46	99.96	0.13925	0.00886	0.13039					46	3970.73	99.94	3.65908	0.00937	3.64971
47	3955.04	99.55	0.15484	0.00941	0.14543					47	3972.35	99.98	1.90528	0.00898	1.8963
48	3972.03	99.98	0.12325	0.004	0.11925					48	3972.35	99.98	3.30082	0.00927	3.29155
49	3973	100	0.20059	0.00891	0.19168					49	3973	100	1.90614	0.00902	1.89712
50	3972.67	99.99	0.14449	0.00942	0.13507					50	3972.5	99.99	2.31939	0.009	2.31039
51	3970.09	99.93	0.13892	0.00915	0.12977					51	3971.06	99.95	3.03435	0.00959	3.02476
52	3970.95	99.95	0.12836	0.004	0.12436					52	3973	100	3.15581	0.00925	3.14656
53	3973	100	0.14817	0.00895	0.13922					53	3968.36	99.88	2.97502	0.00959	2.96543
54	3971.98	99.97	0.12007	0.00921	0.11086					54	3972.5	99.99	1.07287	0.00911	1.06376
55	3972.35	99.98	0.18605	0.00938	0.17667					55	3973	100	2.44065	0.00895	2.4317
56	3972.67	99.99	0.12601	0.004	0.12201					56	3971.98	99.97	3.47529	0.0091	3.46619
57	3965.26	99.8	0.13639	0.00904	0.12735					57	3972.5	99.99	0.95922	0.00889	0.95033
58	3970.73	99.94	0.17825	0.00896	0.16929					58	3972.67	99.99	1.19412	0.00926	1.18486
59	3971.46	99.96	0.1388	0.00928	0.12952					59	3973.01	100	3.71584	0.00902	3.70682
60	3973	100	0.12286	0.00929	0.11357					60	3972.03	99.98	2.94989	0.00893	2.94096
61	3972.03	99.98	0.13865	0.00908	0.12957					61	3973.01	100	1.99611	0.00882	1.98729
62	3972.35	99.98	0.09382	0.004	0.08982					62	3973	100	2.57128	0.00931	2.56197
63	3972.5	99.99	0.10689	0.00991	0.09698					63	3972.5	99.99	2.77656	0.00906	2.7675
64	3972.5	99.99	0.11107	0.0094	0.10167					64	3972.67	99.99	2.20894	0.00957	2.19937
65	3973.01	100	0.18589	0.00916	0.17673					65	3973	100	1.50859	0.0095	1.49909
66	3973	100	0.24184	0.00883	0.23301					66	3973.01	100	1.77183	0.00928	1.76255
67	3972.03	99.98	0.07978	0.00924	0.07054					67	3972.67	99.99	3.1498	0.00909	3.14071
68	3970.09	99.93	0.13973	0.00909	0.13064					68	3972.35	99.98	3.04539	0.00948	3.03591
69	3972.67	99.99	0.0812	0.00906	0.07214					69	3963.71	99.77	2.25177	0.00913	2.24264
70	3970.95	99.95	0.10632	0.00944	0.09688					70	3972.35	99.98	2.32955	0.00896	2.32059
71	3971.98	99.97	0.13197	0.00904	0.12293					71	3972.5	99.99	0.56034	0.00922	0.55112
72	3961.83	99.72	0.0891	0.00912	0.07998					72	3971.98	99.97	3.57648	0.00913	3.56735
73	3970.95	99.95	0.10702	0.00918	0.09784					73	3973	100	0.798	0.00953	0.78847
74	3972.35	99.98	0.21969	0.00936	0.21033					74	3971.98	99.97	2.71505	0.00931	2.70574
75	3973.01	100	0.20522	0.00918	0.19604					75	3972.67	99.99	2.30961	0.00909	2.30052
76	3969.39	99.91	0.15151	0.00914	0.14237					76	3972.67	99.99	2.16622	0.00892	2.1573
77	3972.35	99.98	0.13386	0.00918	0.12468					77	3971.98	99.97	2.72423	0.0091	2.71513
78	3972.5	99.99	0.21731	0.00906	0.20825					78	3972.35	99.98	4.0716	0.004	4.0676
79	3967.84	99.87	0.15803	0.00937	0.14866					79	3972.67	99.99	2.81168	0.00941	2.80227
80	3973.01	100	0.22357	0.00877	0.2148					80	3972.67	99.99	3.67643	0.00939	3.66704
81	3970.73	99.94	0.07135	0.00948	0.06187					81	3971.98	99.97	2.47211	0.00925	2.46286
82	3968.88	99.9	0.09255	0.004	0.08855					82	3972.03	99.98	2.90746	0.00897	2.89849
83	3971.46	99.96	0.11993	0.00885	0.11108					83	3964.92	99.8	2.32258	0.00909	2.31349
84	3973	100	0.25819	0.00975	0.24844					84	3972.5	99.99	3.25057	0.00901	3.24156
85	3972.5	99.99	0.1929	0.00939	0.18351					85	3972.35	99.98	3.81441	0.00948	3.80493
86	3971.7	99.97	0.18874	0.00938	0.17936					86	3971.98	99.97	2.98564	0.00929	2.97635
87	3971.46	99.96	0.16746	0.00949	0.15797					87	3973	100	2.19381	0.00924	2.18457
88	3970.43	99.94	0.09224	0.00912	0.08312					88	3967.5	99.86	3.11249	0.00912	3.10337
89	3971.98	99.97	0.14028	0.00911	0.13117					89	3963.3	99.76	4.32317	0.00894	4.31423
90	3968.88	99.9	0.1746	0.00898	0.16562					90	3973	100	1.06219	0.00923	1.05296
91	3972.67	99.99	0.08448	0.00916	0.07532					91	3973	100	2.22061	0.00895	2.21166
92	3969.91	99.92	0.1891	0.00883	0.18027					92	3971.46	99.96	2.47147	0.00923	2.46224
93	3967.84	99.87	0.1536	0.00941	0.14419					93	3969.12	99.9	3.22206	0.00952	3.21254
94	3972.5	99.99	0.18702	0.00917	0.17785					94	3973.01	100	2.5239	0.004	2.5199
95	3971.46	99.96	0.08825	0.0091	0.07915					95	3971.06	99.95	2.95966	0.00942	2.95024
96	3971.06	99.95	0.11798	0.00964	0.10834					96	3973	100	2.56123	0.00912	2.55211
97	3972.5	99.99	0.17895	0.00922	0.16973					97	3972.67	99.99	3.22672	0.00943	3.21729
98	3972.5	99.99	0.11492	0.00927	0.10565					98	3972.67	99.99	2.65741	0.00913	2.64828
99	3966.86	99.85	0.12541	0.00946	0.11595					99	3973	100	0.8615	0.00928	0.85222
100	3972.5	99.99	0.23118	0.00913	0.22205					100	3973.01	100	0.5375	0.00932	0.52818
101	3971.46	99.96	0.10479	0.00908	0.09571					101	3972.67	99.99	0.7776	0.00926	0.76834
102	3970.41	99.93	0.30171	0.00912	0.29259					102	3972.5	99.99	3.96515	0.00939	3.95576
103	3972.03	99.98	0.07667	0.00989	0.06678					103	3963.19	99.75	3.64523	0.00948	3.63575
104	3972.67	99.99	0.21758	0.00892	0.20866					104	3972.5	99.99	2.97542	0.00949	2.96593
105	3964.74	99.79	0.10338	0.00934	0.09404					105	3973	100	1.60215	0.0093	1.59285
106	3972.03	99.98	0.16203	0.00919	0.15284					106	3972.35	99.98	2.89063	0.00924	2.88139
107	3968.36	99.88	0.13234	0.0094	0.12294					107	3972.5	99.99	2.73452	0.00927	2.72525
108	3967.5	99.86	0.10197	0.0095	0.09247					108	3973	100	0.67928	0.00913	0.67015
109	3972.67	99.99	0.19022	0.00923	0.18099					109	3973	100	3.44812	0.00902	3.4391
110	3969.39	99.91	0.10245	0.0093	0.09315					110	3973	100	2.48844	0.00916	2.47928
111	3971.46	99.96	0.13436	0.00903	0.12533					111	3963.19	99.75	3.20601	0.00947	3.19654
112	3972.35	99.98	0.28796	0.004	0.28396					112	3972.67	99.99	0.74872	0.00943	0.73929
113	3972.35	99.98	0.15078	0.00881	0.14197					113	3972.5	99.99	3.42074	0.00901	3.41173
114	3970.73	99.94	0.13982	0.00945	0.13037					114	3972.5	99.99	2.65383	0.00925	2.64458
115	3969.39	99.91	0.15917	0.00942	0.14975					115	3970.09	99.93	2.51983	0.00924	2.51059
116	3972.67	99.99	0.14324	0.0093	0.13394					116	3973	100	3.07535	0.00946	3.06589
117	3970.09	99.93	0.19703	0.00931	0.18772					117	3972.5	99.99	2.71644	0.00946	2.70698
118	3971.98	99.97	0.20792	0.00918	0.19874					118	3973.01	100	3.44448	0.00883	3.43565
119	3971.85	99.97	0.07623	0.00943	0.0668					119	3959.75	99.67	3.18712	0.00922	3.1779
120	3964.92	99.8	0.21675	0.00929	0.20746					120	3972.67	99.99	2.00468	0.00939	1.99529
121	3970.41	99.93	0.18179	0.00892	0.17287					121	3972.5	99.99	2.97125	0.00918	2.96207
122	3973	100	0.14434	0.0092	0.13514					122	3972.35	99.98	3.33393	0.00926	3.32467
123	3969.39	99.91	0.13458	0.00924	0.12534					123	3972.03	99.98	2.45035	0.0091	2.44125
124	3949.75	99.41	0.0769	0.00959	0.06731					124	3972.35	99.98	2.33028	0.00927	2.32101
125	3972.67	99.99	0.22182	0.00887	0.21295					125	3972.67	99.99	2.75087	0.00958	2.74129
126	3971.98	99.97	0.19724	0.00919	0.18805					126	3973	100	2.56159	0.00938	2.55221
127	3972.17	99.98	0.12823	0.00923	0.119					127	3972.67	99.99	3.68883	0.00898	3.67985
128	3972.5	99.99	0.26085	0.004	0.25685					128	3970.41	99.93	2.83616	0.00934	2.82682
129	3972.67	99.99	0.15212	0.00942	0.1427					129	3968.8	99.89	4.19852	0.00902	4.1895
130	3970.09	99.93	0.10274	0.00932	0.09342					130	3972.35	99.98	1.18375	0.00922	1.17453
131	3972.67	99.99	0.17757	0.00896	0.16861					131	3972.35	99.98	2.4235	0.00938	2.41412
132	3967.5	99.86	0.08872	0.00928	0.07944					132	3972.35	99.98	2.60427	0.00889	2.59538
133	3968.8	99.89	0.10137	0.00917	0.0922					133	3959.75	99.67	3.83657	0.00937	3.8272
134	3956.99	99.6	0.07933	0.00963	0.0697					134	3973	100	3.06134	0.00925	3.05209
135	3967.5	99.86	0.12843	0.00915	0.11928					135	3972.67	99.99	2.52134	0.00907	2.51227
136	3972.03	99.98	0.21625	0.00981	0.20644					136	3971.98	99.97	2.09538	0.00922	2.08616
137	3970.41	99.93	0.15369	0.00892	0.14477					137	3973	100	3.28329	0.00938	3.27391
138	3968.15	99.88	0.10296	0.0093	0.09366					138	3972.35	99.98	2.03083	0.00904	2.02179
139	3972.5	99.99	0.09662	0.0092	0.08742					139	3971.98	99.97	1.27099	0.00955	1.26144
140	3971.2	99.95	0.159	0.00923	0.14977					140	3972.67	99.99	1.12241	0.00929	1.11312
141	3972.5	99.99	0.11758	0.00936	0.10822					141	3973	100	2.23915	0.00914	2.23001
142	3973.01	100	0.16823	0.00955	0.15868					142	3973.01	100	1.59297	0.0089	1.58407
143	3971.38	99.96	0.11586	0.00888	0.10698					143	3972.5	99.99	3.95341	0.00911	3.9443
144	3959.57	99.66	0.13292	0.00925	0.12367					144	3973.01	100	3.77862	0.00898	3.76964
145	3972.67	99.99	0.18959	0.00924	0.18035					145	3972.67	99.99	3.69741	0.00921	3.6882
146	3969.58	99.91	0.17378	0.00909	0.16469					146	3967.18	99.85	3.54157	0.0088	3.53277
147	3973	100	0.08994	0.00883	0.08111					147	3972.67	99.99	3.26817	0.00918	3.25899
148	3970.09	99.93	0.16285	0.00921	0.15364					148	3973	100	3.18866	0.00907	3.17959
149	3965.56	99.81	0.10211	0.00918	0.09293					149	3972.67	99.99	1.75343	0.00921	1.74422
150	3968.8	99.89	0.15581	0.00883	0.14698					150	3972.67	99.99	2.54344	0.00965	2.53379
151	3972.67	99.99	0.15618	0.00927	0.14691					151	3972.67	99.99	2.26799	0.00928	2.25871
152	3972.67	99.99	0.17463	0.00917	0.16546					152	3970.73	99.94	3.77595	0.00961	3.76634
153	3968.88	99.9	0.11004	0.004	0.10604					153	3973.01	100	3.27463	0.00942	3.26521
154	3972.35	99.98	0.13321	0.00927	0.12394					154	3972.5	99.99	2.70058	0.00905	2.69153
155	3971.46	99.96	0.17509	0.00975	0.16534					155	3972.5	99.99	1.1018	0.00902	1.09278
156	3972.35	99.98	0.17583	0.00903	0.1668					156	3968.8	99.89	2.70112	0.00895	2.69217
157	3969.91	99.92	0.10272	0.00914	0.09358					157	3972.35	99.98	2.21341	0.00901	2.2044
158	3972.35	99.98	0.0892	0.00956	0.07964					158	3972.67	99.99	2.02289	0.00915	2.01374
159	3972.67	99.99	0.28138	0.00912	0.27226					159	3972.35	99.98	1.39883	0.00925	1.38958
160	3973	100	0.14005	0.00934	0.13071					160	3970.73	99.94	3.25181	0.00939	3.24242
161	3968.32	99.88	0.08504	0.00957	0.07547					161	3973.01	100	0.89103	0.00944	0.88159
162	3971.98	99.97	0.1695	0.00905	0.16045					162	3972.67	99.99	1.59386	0.00891	1.58495
163	3971.98	99.97	0.08566	0.00941	0.07625					163	3972.35	99.98	0.89624	0.0088	0.88744
164	3973	100	0.27841	0.00896	0.26945					164	3972.5	99.99	3.8465	0.00926	3.83724
165	3973	100	0.35224	0.00929	0.34295					165	3970.09	99.93	2.99829	0.00939	2.9889
166	3972.03	99.98	0.16877	0.00919	0.15958					166	3971.98	99.97	2.34901	0.00952	2.33949
167	3972.03	99.98	0.13767	0.00983	0.12784					167	3972.67	99.99	3.19165	0.00943	3.18222
168	3972.35	99.98	0.13632	0.00935	0.12697					168	3972.35	99.98	4.0948	0.00917	4.08563
169	3966.21	99.83	0.10701	0.00908	0.09793					169	3973	100	2.66745	0.00949	2.65796
170	3972.35	99.98	0.16185	0.00944	0.15241					170	3972.35	99.98	2.36732	0.00945	2.35787
171	3972.67	99.99	0.17267	0.00946	0.16321					171	3972.67	99.99	1.00819	0.00965	0.99854
172	3972.5	99.99	0.1637	0.004	0.1597					172	3973	100	2.01959	0.00936	2.01023
173	3972.17	99.98	0.14453	0.00915	0.13538					173	3972.67	99.99	1.91829	0.00954	1.90875
174	3971.7	99.97	0.09329	0.00931	0.08398					174	3970.73	99.94	2.30475	0.00927	2.29548
175	3970.43	99.94	0.19177	0.00888	0.18289					175	3973.01	100	3.11711	0.00944	3.10767
176	3967.33	99.86	0.10817	0.00937	0.0988					176	3972.5	99.99	2.62414	0.00908	2.61506
177	3969.91	99.92	0.08595	0.00887	0.07708					177	3972.35	99.98	3.39307	0.00915	3.38392
178	3970.41	99.93	0.19075	0.00942	0.18133					178	3973	100	2.81053	0.00902	2.80151
179	3972.35	99.98	0.20812	0.00964	0.19848					179	3973	100	4.03384	0.00909	4.02475
180	3967.18	99.85	0.13706	0.00902	0.12804					180	3972.35	99.98	1.91606	0.00931	1.90675
181	3972.67	99.99	0.25481	0.00929	0.24552					181	3973.01	100	3.41357	0.00949	3.40408
182	3967.5	99.86	0.22207	0.00956	0.21251					182	3972.67	99.99	0.74357	0.00939	0.73418
183	3972.35	99.98	0.14137	0.00915	0.13222					183	3973.01	100	2.70094	0.00913	2.69181
184	3969.91	99.92	0.14783	0.009	0.13883					184	3972.67	99.99	2.10176	0.00907	2.09269
185	3970.43	99.94	0.16149	0.0093	0.15219					185	3972.5	99.99	2.90104	0.00931	2.89173
186	3964.94	99.8	0.09534	0.00893	0.08641					186	3971.98	99.97	3.41764	0.00906	3.40858
187	3952.33	99.48	0.09009	0.00919	0.0809					187	3972.67	99.99	1.06767	0.009	1.05867
188	3965.24	99.8	0.15235	0.00926	0.14309					188	3972.67	99.99	1.65923	0.00946	1.64977
189	3972.67	99.99	0.14861	0.00917	0.13944					189	3972.35	99.98	3.28942	0.00912	3.2803
190	3973.01	100	0.1242	0.00906	0.11514					190	3972.03	99.98	0.92822	0.00902	0.9192
191	3971.52	99.96	0.12781	0.0089	0.11891					191	3972.67	99.99	0.62532	0.00956	0.61576
192	3972.35	99.98	0.16497	0.00953	0.15544					192	3972.35	99.98	1.02907	0.00936	1.01971
193	3972.67	99.99	0.20928	0.00928	0.2					193	3966.86	99.85	2.46908	0.00905	2.46003
194	3972.5	99.99	0.1114	0.00901	0.10239					194	3972.67	99.99	2.36108	0.00937	2.35171
195	3968.36	99.88	0.08584	0.00945	0.07639					195	3972.35	99.98	2.41776	0.0097	2.40806
196	3964.59	99.79	0.21513	0.004	0.21113					196	3972.35	99.98	4.11443	0.00948	4.10495
197	3970.41	99.93	0.17312	0.0094	0.16372					197	3969.44	99.91	1.75521	0.00857	1.74664
198	3973.01	100	0.17417	0.00912	0.16505					198	3971.98	99.97	1.88995	0.00894	1.88101
199	3972.35	99.98	0.16248	0.00889	0.15359					199	3972.03	99.98	1.98244	0.0088	1.97364
200	3973.01	100	0.11372	0.00944	0.10428					200	3972.67	99.99	1.33236	0.00911	1.32325

[truncated: 1 more sheets: 10_HCFACO_Seeds(25)]
