# Supplementary material for: Enhanced Hyper-Cube Framework Aco for Combinatorial Optimization Problems
Source: Preprints.org preprint supplement (doi:10.20944/preprints202108.0573.v1), 2021-08-31
Supplement: Supplementary file 12 [file 06_BWACO_@_Seeds(75)_Exp.xlsx]

## Sheet: 06_BWACO_@_Seeds(75)_Fast
Slow Convergence										Slow Convergenece
ige	Fbest(ige)	Fworst(ige)	Fmean(ige)	BWLocalDis	GlobalDis	Segma	MaxTau	MinTau		Expeirement no.(Iexp) =	82
1	3013.75	1459.87	2349.12	11	14	1	0.9	0.9		Seeds=	75
2	3161.44	1649.64	2402.38	8	9	1	0.81	0.81		Number of variables =	16
3	3161.44	1700.45	2164.16	14	9	1	0.729	0.729		no. of Ants =	25
4	3161.44	1876.66	2188.57	16	9	1	0.6561	0.6561		Maximum CBLF(fopt) =	3972.35
5	3161.44	1463.46	2126.94	14	9	1	0.5905	0.5905		Optimal Solution(xopt) =	333332223223323
6	3161.44	1725	2115.28	15	9	1	0.5314	0.5314		Number of Practical Optima =	1
7	3171.91	1630.32	2280.98	4	7	1	0.4783	0.0343		no. of Iterations(ige) =	53
8	3171.91	1523.37	2246.51	11	7	1	0.4305	0.0323		1st Global optima Found @ ige =	43
9	3171.91	1432.45	2151.26	10	7	1	0.3874	0.031		Minimum Best Solution =	3013.75
10	3171.91	1148.22	2294.99	8	7	1	0.3487	0.0248		Mean of Best Solution =	3753.87
11	3741.92	1397.11	2368.48	13	4	1	0.3138	0.0266		SD of Best Solution =	307.477
12	3741.92	1543.41	2224.73	12	4	1	0.2824	0.0304		Fitness Distance Correlation =	-848.784
13	3741.92	1727.51	2442.81	12	4	1	0.2542	0.0324		Correlation Coefficent =	-0.87405
14	3746.57	1497.3	2411.95	10	5	1	0.2288	0.0291		Elapsed Time =	2.8418
15	3746.57	1815.97	2530.51	10	5	1	0.2059	0.0334
16	3746.57	1450.27	2506.93	10	5	1	0.1853	0.0268
17	3746.57	1467.18	2429.49	11	5	1	0.1668	0.0275
18	3746.57	1852.11	2750.74	8	5	1	0.1501	0.0326
19	3746.57	2089.49	2667.76	8	5	1	0.1351	0.0374
20	3746.57	1960.62	2700.63	6	5	1	0.1216	0.0349
21	3746.57	1934.84	2830.81	6	5	1	0.1094	0.0336
22	3837.75	1678.02	2845.28	10	3	1	0.0985	0.0303
23	3837.75	1769.3	2692.13	10	3	1	0.0886	0.0311
24	3837.75	1824.8	2875.24	10	3	1	0.0798	0.0311
25	3837.75	2349.98	2935.71	8	3	1	0.0718	0.0396
26	3837.75	2515.39	3018.52	5	3	1	0.0646	0.0418
27	3837.75	2115.19	3010.73	4	3	1	0.0581	0.0352
28	3949.75	2412.61	3179.88	7	2	1	0.0523	0.0386
29	3967.32	2552.93	3172.58	6	4	1	0.0471	0.0408
30	3967.32	2168	3208.49	8	4	1	0.0424	0.0344
31	3967.32	2647.24	3297.84	5	4	1	0.0415	0.0415
32	3967.32	2682.81	3357.23	4	4	1	0.0417	0.0417
33	3967.32	2666.73	3365.83	4	4	1	0.0414	0.0414
34	3967.32	2256	3247.94	7	4	1	0.0356	0.0356
35	3971.52	2692.37	3263.07	7	1	1	0.0424	0.0424
36	3971.52	2564.86	3392.33	4	1	1	0.0397	0.0397
37	3971.52	2743.65	3511.53	3	1	1	0.0418	0.0418
38	3971.52	2648.91	3387.97	6	1	1	0.041	0.041
39	3971.52	2744.48	3566.05	4	1	1	0.0415	0.0415
40	3971.52	2356.43	3539.87	7	1	1	0.0358	0.0358
41	3971.52	2798.43	3544.5	3	1	1	0.0424	0.0424
42	3971.52	2668.56	3668.55	3	1	4	0.107	0.107
43	3972.35	2922.53	3751.65	3	0	1	0.0963	0.0432
44	3972.35	2442.14	3731.2	5	0	3	0.0867	0.0772
45	3972.35	3245.95	3813.48	4	0	4	0.1294	0.078
46	3972.35	3356.17	3879.96	2	0	10	0.3024	0.0702
47	3972.35	3375.88	3918.58	1	0	13	0.3889	0.0632
48	3972.35	3952.64	3970.67	1	0	20	0.6872	0.0569
49	3972.35	3952.64	3971.56	1	0	24	0.8199	0.0512
50	3972.35	3917.74	3970.16	1	0	24	0.8127	0.0461
51	3972.35	3862.38	3967.16	1	0	23	0.7688	0.0415
52	3972.35	3862.38	3963.52	1	0	22	0.7364	0.0373
53	3972.35	3375.88	3948.49	1	0	24	0.7004	0.0336

## Sheet: 06_BWACO_@_Seeds(75)_Slow
Slow Convergence										Slow Convergenece
ige	Fbest(ige)	Fworst(ige)	Fmean(ige)	BWLocalDis	GlobalDis	Segma	MaxTau	MinTau		Expeirement no.(Iexp) =	16
1	3558.52	2154.64	2806.84	12	11	1	0.9	0.9		Seeds=	75
2	3558.52	1517.92	2387.01	16	11	1	0.81	0.81		Number of variables =	16
3	3558.52	1644.25	2386.62	16	11	1	0.729	0.729		no. of Ants =	25
4	3558.52	1648.01	2406.08	16	11	1	0.6561	0.6561		Maximum CBLF(fopt) =	3973.01
5	3558.52	1368.04	2327.84	15	11	1	0.5905	0.5905		Optimal Solution(xopt) =	332233333333233
6	3558.52	1599.23	2324.8	16	11	1	0.5314	0.5314		Number of Practical Optima =	1
7	3558.52	1233.86	2452.01	15	11	1	0.4783	0.4783		no. of Iterations(ige) =	117
8	3558.52	1750.25	2334.68	15	11	1	0.4305	0.4305		1st Global optima Found @ ige =	61
9	3558.52	1858.02	2358.7	15	11	1	0.3874	0.3874		Minimum Best Solution =	3558.52
10	3558.52	1797.52	2481.82	16	11	1	0.3487	0.3487		Mean of Best Solution =	3860.39
11	3558.52	1563.24	2500.04	16	11	1	0.3138	0.3138		SD of Best Solution =	167.09
12	3558.52	1607.91	2414.2	16	11	1	0.2824	0.2824		Fitness Distance Correlation =	-698.249
13	3558.52	1625	2446.17	16	11	1	0.2542	0.2542		Correlation Coefficent =	-0.97311
14	3558.52	1601.75	2430.27	15	11	1	0.2288	0.2288		Elapsed Time =	6.1125
15	3558.52	1909.94	2461.1	16	11	1	0.2059	0.2059
16	3558.52	1661.5	2501.38	15	11	1	0.1853	0.1853
17	3558.52	1554.79	2375.62	15	11	1	0.1668	0.1668
18	3558.52	1914.64	2653.9	16	11	1	0.1501	0.1501
19	3558.52	1517.29	2596.57	14	11	1	0.1351	0.1351
20	3558.52	1487.57	2557.06	16	11	1	0.1216	0.1216
21	3558.52	1684.42	2554.08	16	11	1	0.1094	0.1094
22	3558.52	1416.56	2343.24	15	11	1	0.0985	0.0985
23	3558.52	1697.16	2640.66	14	11	1	0.0886	0.0886
24	3558.52	1923.81	2669.74	12	11	1	0.0798	0.0798
25	3682.91	1539.76	2578.07	15	5	1	0.0718	0.0718
26	3682.91	1768.82	2598.47	14	5	1	0.0646	0.0646
27	3682.91	2074.01	2612.67	13	5	1	0.0581	0.0581
28	3682.91	2003.96	2627.9	11	5	1	0.0523	0.0523
29	3682.91	1780.28	2660.43	13	5	1	0.0471	0.0471
30	3714.35	1805.09	2610.29	14	9	1	0.0424	0.0424
31	3897.08	1978.69	2933.71	11	3	1	0.0382	0.0331
32	3897.08	1790.04	2555.39	9	3	1	0.0343	0.0321
33	3897.08	1660.89	2668.59	14	3	1	0.0309	0.0291
34	3897.08	1943.21	2764.53	11	3	1	0.0335	0.0335
35	3897.08	2245.84	2852.26	9	3	1	0.0381	0.0381
36	3897.08	2066.42	2945.71	8	3	1	0.0345	0.0345
37	3897.08	1889.3	2924.79	8	3	1	0.0317	0.0317
38	3897.08	1725.29	2842.24	10	3	1	0.0293	0.0293
39	3897.08	2066.82	2897.57	9	3	1	0.0348	0.0348
40	3897.08	3014.01	3433.38	4	3	1	0.0468	0.0468
41	3897.08	2216.26	3191.1	8	3	1	0.0356	0.0356
42	3897.08	2262.95	3247.82	8	3	1	0.0361	0.0361
43	3897.08	3082.84	3499.64	4	3	1	0.0475	0.0475
44	3897.08	2405.56	3370.4	6	3	1	0.0377	0.0377
45	3897.08	2534.54	3227.91	8	3	1	0.0405	0.0405
46	3897.08	2768.48	3442.53	4	3	1	0.043	0.043
47	3897.08	2602.38	3389.39	6	3	1	0.0407	0.0407
48	3897.08	2971.59	3568.33	7	3	1	0.0454	0.0454
49	3897.08	3059.07	3650.02	4	3	1	0.0463	0.0463
50	3930.62	2374.81	3483.99	7	5	1	0.0417	0.0365
51	3967.2	3364.73	3709.23	3	2	1	0.05	0.05
52	3967.53	2504.77	3668.96	5	1	1	0.045	0.0374
53	3967.53	2925.65	3642.65	4	1	2	0.0684	0.0684
54	3967.53	3042.3	3764.19	4	1	3	0.0961	0.0961
55	3970.73	3445.52	3850.93	3	2	1	0.0865	0.0504
56	3971.06	3539.26	3861.26	4	1	4	0.1408	0.0778
57	3971.06	3767.14	3936.55	1	1	8	0.2759	0.07
58	3971.06	3697.23	3930.67	1	1	13	0.426	0.063
59	3971.06	3693.84	3949.68	1	1	18	0.5806	0.0567
60	3971.06	3767.14	3962.22	1	1	22	0.7185	0.0511
61	3973.01	3374.59	3934.86	2	0	1	0.6466	0.046
62	3973.01	3134.93	3804.67	5	0	7	0.582	0.0414
63	3973.01	3734.16	3949.7	2	0	8	0.5238	0.0372
64	3973.01	3697.23	3941.04	2	0	5	0.4714	0.0335
65	3973.01	3693.84	3938.83	2	0	3	0.4243	0.0302
66	3973.01	3730.54	3951.42	1	0	2	0.3818	0.0271
67	3973.01	3445.52	3913.62	2	0	4	0.3437	0.0244
68	3973.01	3374.27	3893.68	3	0	2	0.3093	0.022
69	3973.01	3449.05	3890.36	2	0	1	0.2784	0.0198
70	3973.01	3734.68	3888.51	3	0	2	0.2505	0.0178
71	3973.01	3731.06	3947.4	2	0	9	0.3044	0.016
72	3973.01	3693.84	3940.79	2	0	15	0.4874	0.0144
73	3973.01	3749.13	3962.96	1	0	10	0.3373	0.013
74	3973.01	3845.02	3961.09	1	0	12	0.4104	0.0117
75	3973.01	3971.06	3972.62	1	0	20	0.6903	0.0105
76	3973.01	3967.53	3972.64	1	0	22	0.7563	0.0095
77	3973.01	3971.06	3972.78	1	0	22	0.757	0.0085
78	3973.01	3916.44	3970.3	2	0	20	0.6808	0.0077
79	3973.01	3971.06	3972.78	1	0	22	0.757	0.0069
80	3973.01	3967.53	3972.56	1	0	21	0.723	0.0062
81	3973.01	3749.13	3963.82	1	0	21	0.6833	0.0056
82	3973.01	3971.06	3972.93	1	0	23	0.7903	0.005
83	3973.01	3971.06	3972.78	1	0	22	0.757	0.0045
84	3973.01	3971.06	3972.93	1	0	24	0.8236	0.0041
85	3973.01	3967.53	3972.72	1	0	23	0.7896	0.0037
86	3973.01	3967.53	3972.72	1	0	23	0.7896	0.0033
87	3973.01	3971.06	3972.86	1	0	23	0.7903	0.003
88	3973.01	3971.06	3972.93	1	0	24	0.8236	0.0027
89	3973.01	3903.19	3970.14	1	0	23	0.7768	0.0024
90	3973.01	3970.73	3972.92	2	0	24	0.8235	0.0022
91	3973.01	3973.01	3973.01	0	0	25	0.8573	0.0019
92	3973.01	3967.53	3972.79	1	0	24	0.8229	0.0018
93	3973.01	3973.01	3973.01	0	0	25	0.8573	0.0016
94	3973.01	3973.01	3973.01	0	0	25	0.8573	0.0014
95	3973.01	3971.06	3972.93	1	0	24	0.8236	0.0013
96	3973.01	3973.01	3973.01	0	0	25	0.8573	0.0012
97	3973.01	3973.01	3973.01	0	0	25	0.8573	0.001
98	3973.01	3973.01	3973.01	0	0	25	0.8573	0.0009
99	3973.01	3971.06	3972.86	1	0	23	0.7903	0.0008
100	3973.01	3971.06	3972.93	1	0	24	0.8236	0.0008
101	3973.01	3973.01	3973.01	0	0	25	0.8573	0.0007
102	3973.01	3973.01	3973.01	0	0	25	0.8573	0.0006
103	3973.01	3973.01	3973.01	0	0	25	0.8573	0.0006
104	3973.01	3973.01	3973.01	0	0	25	0.8573	0.0005
105	3973.01	3973.01	3973.01	0	0	25	0.8573	0.0004
106	3973.01	3973.01	3973.01	0	0	25	0.8573	0.0004
107	3973.01	3973.01	3973.01	0	0	25	0.8573	0.0004
108	3973.01	3973.01	3973.01	0	0	25	0.8573	0.0003
109	3973.01	3973.01	3973.01	0	0	25	0.8573	0.0003
110	3973.01	3973.01	3973.01	0	0	25	0.8573	0.0003
111	3973.01	3973.01	3973.01	0	0	25	0.8573	0.0002
112	3973.01	3973.01	3973.01	0	0	25	0.8573	0.0002
113	3973.01	3973.01	3973.01	0	0	25	0.8573	0.0002
114	3973.01	3973.01	3973.01	0	0	25	0.8573	0.0002
115	3973.01	3973.01	3973.01	0	0	25	0.8573	0.0002
116	3973.01	3973.01	3973.01	0	0	25	0.8573	0.0001
117	3973.01	3973.01	3973.01	0	0	25	0.8573	0.0001
