# Supplementary material for: Enhanced Hyper-Cube Framework Aco for Combinatorial Optimization Problems
Source: Preprints.org preprint supplement (doi:10.20944/preprints202108.0573.v1), 2021-08-31
Supplement: Supplementary file 13 [file 06_BWACO_Seeds_Results.xlsx]

## Sheet: 00_Index
		Global optimal solution		Relaibility (%)		Normalized Price (iteration)		Correlation Coefficent		Performance rate		Elapsed time (Sec)		Solution Quality
		Fast convergence	Slow Convergence	Fast convergence	Slow Convergence	Fast convergence	Slow Convergence	Fast convergence	Slow Convergence	Fast convergence	Slow Convergence	Fast convergence	Slow Convergence	Fast convergence	Slow Convergence
	Seed (301)	3965.26	3973.01	0	61	NA	185.467	-1	-0.91986	0.00078647	0.0053918	0.77159	6.0243	91.0837	99.6945
	Seed (2)	3960.61	3973.01	0	60.5	NA	184.198	-1	-0.92149	0.00039339	0.0054289	0.71275	5.9228	91.43	99.6791
	Seed (50)	3972.67	3973.01	1	65	1278	171.608	-1	-0.92922	0.00078247	0.0058272	0.70772	5.9176	91.169	99.6968
	Seed (75)	3972.35	3973.01	0.5	58	2487	193.095	-1	-0.92221	0.00040209	0.0051788	0.69836	5.9388	91.3787	99.6743
	Seed (111)	3972.67	3973.01	1	66.5	1282.5	167.797	-1	-0.92434	0.00077973	0.0059596	0.71453	5.9207	91.8428	99.7554
	Seed (200)	3897.02	3973.01	0	63.5	65535	178.606	-1	-0.91886	0.00040634	0.0055989	0.6858	5.9986	91.5336	99.605
	Seed (167)	3932.81	3973.01	0	57	NA	197.482	-1	-0.92446	0.00040568	0.0050637	0.70372	5.9741	91.3773	99.6989
	Seed (225)	3933.72	3973.01	0	57	65535	197.21	-1	-0.92239	0.00039872	0.0050707	0.70128	5.9253	91.1515	99.5349
	Seed (11)	3937.86	3973.01	0	59.5	65535	186.395	-1	0	0.00039872	0.005365	0.72061	5.9253	91.531	99.7252
	Seed (25)	3955.07	3973.01	0	60	65535	186.108	-1	-0.92355	0.0004095	0.0053732	0.69617	6.2726	91.5239	99.6452
			Fast Convergence						Slow Convergence
			Relaibility (%)	Normalized Price (iteration)	Correlation Coefficent	Performance Rate	Elapsed time (sec)		Relaibility (%)	Normalized Price (iteration)	Correlation Coefficent	Performance Rate	Elapsed time (sec)
		Min.	0	1278	-1	0.00039339	0.6858	Min.	57	167.797	-0.92922	0.0050637	5.9176
		Max.	1	65535	-1	0.00078647	0.77159	Max.	66.5	197.482	0	0.0059596	6.2726
		Mean	0.25	38169.6	-1	0.000516311	0.711253	Mean	60.8	184.797	-0.830638	0.00542578	5.98201
		Median	0	65535	-1	0.00040601	0.70572	Median	60.25	185.788	-0.9223	0.0053825	5.93205
		Standrad division	0.403113	31601	0	0.000174576	0.0222516	Standrad division	3.10805	9.43522	0.276893	0.000283175	0.103093
			Solution Quality
			Fast Conv.	Slow Conv.
		Min.	91.0837	99.5349
		Max.	91.8428	99.7554
		Mean	91.4021	99.6709
		Median	91.4043	99.6868
		Standrad division	0.215271	0.0597316

## Sheet: 01_BWACO_Seeds(301)
Fast Converegnce Exp							Fast Converegnce Exp			Slow Converegnce Exp							Slow Converegnce Exp
#	CBLF	Quality	Taumax	Taumin	DeltaTauminmax		Global Optimal Solution =	3965.26		#	CBLF	Quality	Taumax	Taumin	DeltaTauminmax		Global Optimal Solution =	3973.01
1	3596.67	90.53	0.01879	0.00013	0.01866		Minimum Optimal Solution =	3233.29		1	3972.35	99.98	0.83333	0.0001	0.83323		Minimum Optimal Solution =	3755.51
2	3519.16	88.58	0.01659	0.00013	0.01646		Mean of Optimal Solution =	3618.77		2	3972.35	99.98	0.83333	0.00013	0.8332		Mean of Optimal Solution =	3960.87
3	3504.66	88.21	0.01894	0.00015	0.01879		Median of Optimal Solution =	3618.77		3	3951.67	99.46	0.83333	0.00011	0.83322		Median of Optimal Solution =	3960.87
4	3771.14	94.92	0.01486	0.0001	0.01476		Solution Standrad Deviation =	132.963		4	3965.26	99.8	0.83333	0.00012	0.83321		Solution Standrad Deviation =	30.2456
5	3617.47	91.05	0.01842	0.00014	0.01828		Average Price =	12.715		5	3971.06	99.95	0.83333	9e-05	0.83324		Average Price =	113.135
6	3567.88	89.8	0.01706	0.00011	0.01695		Relability =	0		6	3953.37	99.51	0.83333	0.0001	0.83323		Relability =	61
7	3452.82	86.91	0.01957	0.00015	0.01942		Normalized Price =	NA		7	3958.54	99.64	0.83333	0.00011	0.83322		Normalized Price =	185.467
8	3519.76	88.59	0.01534	0.0001	0.01524		Average Solution Quality =	91.0837		8	3931.65	98.96	0.83333	9e-05	0.83324		Average Solution Quality =	99.6945
9	3682.81	92.7	0.01888	0.00012	0.01876		Average FDC =	-79.6897		9	3971.98	99.97	0.83333	0.00014	0.83319		Average FDC =	-509.544
10	3522.49	88.66	0.01681	0.00013	0.01668		Correlation Coefficent =	-1		10	3973	100	0.83333	0.0001	0.83323		Correlation Coefficent =	-0.91986
11	3276.29	82.46	0.01917	0.00016	0.01901		Solution Robustness =	27.2164		11	3972.03	99.98	0.83333	0.00013	0.8332		Solution Robustness =	130.957
12	3659.92	92.12	0.01728	0.00014	0.01714		Performance Rate =	0.00078647		12	3972.67	99.99	0.83333	0.00012	0.83321		Performance Rate =	0.0053918
13	3531.21	88.88	0.01683	0.00011	0.01672		Average Elapsed Time =	0.77159		13	3970.95	99.95	0.83333	0.00012	0.83321		Average Elapsed Time =	6.0243
14	3523.5	88.69	0.01813	0.00015	0.01798					14	3922.35	98.72	0.83333	0.00011	0.83322
15	3717.78	93.58	0.01567	0.00012	0.01555					15	3973	100	0.83333	0.00013	0.8332
16	3592.35	90.42	0.01516	0.00012	0.01504					16	3973	100	0.83333	0.00013	0.8332
17	3526.64	88.76	0.01671	0.0001	0.01661					17	3971.06	99.95	0.83333	0.00012	0.83321
18	3451.2	86.87	0.01872	0.00013	0.01859					18	3964.59	99.79	0.83333	0.0001	0.83323
19	3704.08	93.23	0.01559	0.00013	0.01546					19	3906.75	98.33	0.83333	0.00012	0.83321
20	3825.32	96.28	0.01709	0.00012	0.01697					20	3972.67	99.99	0.83333	0.00012	0.83321
21	3410.36	85.84	0.01998	0.00012	0.01986					21	3972.67	99.99	0.83333	0.00011	0.83322
22	3441.08	86.61	0.01564	0.00011	0.01553					22	3970.43	99.94	0.83333	0.0001	0.83323
23	3679.99	92.62	0.01775	0.00014	0.01761					23	3964.92	99.8	0.83333	0.00011	0.83322
24	3804.63	95.76	0.0159	0.00012	0.01578					24	3972.35	99.98	0.83333	0.00011	0.83322
25	3619.87	91.11	0.02044	0.00011	0.02033					25	3972.5	99.99	0.83333	0.00012	0.83321
26	3698.53	93.09	0.0153	0.00011	0.01519					26	3973.01	100	0.83333	0.00012	0.83321
27	3599.92	90.61	0.01734	0.00012	0.01722					27	3971.98	99.97	0.83333	0.00011	0.83322
28	3551.32	89.39	0.02065	0.00014	0.02051					28	3972.67	99.99	0.83333	0.00012	0.83321
29	3663.34	92.21	0.01697	0.00012	0.01685					29	3954.92	99.54	0.83333	0.00015	0.83318
30	3632.51	91.43	0.01906	0.00015	0.01891					30	3966.86	99.85	0.83333	0.00011	0.83322
31	3452.9	86.91	0.02049	0.00017	0.02032					31	3973	100	0.83333	0.00011	0.83322
32	3621.23	91.15	0.01642	0.00011	0.01631					32	3964.92	99.8	0.83333	0.0001	0.83323
33	3700.04	93.13	0.01674	0.00013	0.01661					33	3972.5	99.99	0.83333	0.00011	0.83322
34	3691.66	92.92	0.0159	0.00012	0.01578					34	3955.95	99.57	0.83333	0.00012	0.83321
35	3617.08	91.04	0.01664	0.00014	0.0165					35	3972.35	99.98	0.83333	0.00013	0.8332
36	3586.59	90.27	0.01562	0.00011	0.01551					36	3926.46	98.83	0.83333	0.00011	0.83322
37	3587.69	90.3	0.01785	0.00014	0.01771					37	3970.95	99.95	0.83333	0.00012	0.83321
38	3325.93	83.71	0.01878	0.00012	0.01866					38	3972.67	99.99	0.83333	0.0001	0.83323
39	3611.05	90.89	0.02123	0.0001	0.02113					39	3972.5	99.99	0.83333	0.00011	0.83322
40	3233.29	81.38	0.01738	0.00016	0.01722					40	3971.06	99.95	0.83333	0.00011	0.83322
41	3659.22	92.1	0.01697	0.00014	0.01683					41	3972.5	99.99	0.83333	0.00012	0.83321
42	3606.35	90.77	0.01801	0.00012	0.01789					42	3971.46	99.96	0.83333	0.00011	0.83322
43	3855.99	97.05	0.01457	0.00011	0.01446					43	3971.46	99.96	0.83333	0.00012	0.83321
44	3632.55	91.43	0.01512	0.00013	0.01499					44	3939.41	99.15	0.83333	0.00012	0.83321
45	3652.95	91.94	0.01679	0.00011	0.01668					45	3953.37	99.51	0.83333	9e-05	0.83324
46	3845.41	96.79	0.01547	0.00012	0.01535					46	3972.35	99.98	0.83333	0.00014	0.83319
47	3820.5	96.16	0.02083	0.00012	0.02071					47	3972.35	99.98	0.83333	0.00012	0.83321
48	3546.26	89.26	0.0202	0.00012	0.02008					48	3959.1	99.65	0.83333	0.00011	0.83322
49	3688.59	92.84	0.01785	0.00012	0.01773					49	3947.79	99.37	0.83333	0.0001	0.83323
50	3482.23	87.65	0.01783	0.00013	0.0177					50	3968.8	99.89	0.83333	0.00012	0.83321
51	3872.2	97.46	0.01713	0.00013	0.017					51	3959.75	99.67	0.83333	0.0001	0.83323
52	3687.88	92.82	0.01706	0.00014	0.01692					52	3972.67	99.99	0.83333	0.00013	0.8332
53	3581	90.13	0.01555	0.00011	0.01544					53	3972.67	99.99	0.83333	0.00012	0.83321
54	3483.45	87.68	0.01969	0.00011	0.01958					54	3970.73	99.94	0.83333	0.00013	0.8332
55	3563.96	89.7	0.01683	0.00012	0.01671					55	3973	100	0.83333	0.00011	0.83322
56	3605.59	90.75	0.01628	0.00015	0.01613					56	3961.71	99.72	0.83333	0.00013	0.8332
57	3337.74	84.01	0.02032	0.00014	0.02018					57	3972.67	99.99	0.83333	0.0001	0.83323
58	3539.34	89.08	0.01657	0.0001	0.01647					58	3972.03	99.98	0.83333	0.00013	0.8332
59	3800.83	95.67	0.01852	0.00014	0.01838					59	3972.5	99.99	0.83333	0.00012	0.83321
60	3514.38	88.46	0.019	0.00011	0.01889					60	3953.28	99.5	0.83333	0.00011	0.83322
61	3699.23	93.11	0.01573	0.00012	0.01561					61	3966.53	99.84	0.83333	0.00013	0.8332
62	3726.77	93.8	0.01715	0.00013	0.01702					62	3973.01	100	0.83333	0.00011	0.83322
63	3546.43	89.26	0.02867	0.00014	0.02853					63	3953.61	99.51	0.83333	0.00012	0.83321
64	3394.91	85.45	0.01892	0.00014	0.01878					64	3972.5	99.99	0.83333	0.00012	0.83321
65	3334.72	83.93	0.01974	0.00017	0.01957					65	3925.81	98.81	0.83333	9e-05	0.83324
66	3647.31	91.8	0.01844	0.00012	0.01832					66	3970.09	99.93	0.83333	0.00011	0.83322
67	3822.57	96.21	0.01541	0.00011	0.0153					67	3936.16	99.07	0.83333	0.00012	0.83321
68	3616.7	91.03	0.01812	0.00015	0.01797					68	3970.09	99.93	0.83333	0.00011	0.83322
69	3716.59	93.55	0.01778	0.0001	0.01768					69	3971.06	99.95	0.83333	0.00012	0.83321
70	3809.56	95.89	0.01544	0.00011	0.01533					70	3929.69	98.91	0.83333	9e-05	0.83324
71	3563.36	89.69	0.01963	0.00012	0.01951					71	3969.76	99.92	0.83333	0.0001	0.83323
72	3710.6	93.4	0.01539	0.00012	0.01527					72	3875.72	97.55	0.83333	0.0001	0.83323
73	3806.54	95.81	0.01697	0.00014	0.01683					73	3973.01	100	0.83333	9e-05	0.83324
74	3525.47	88.74	0.01913	0.00012	0.01901					74	3964.59	99.79	0.83333	0.00011	0.83322
75	3644.78	91.74	0.01852	0.0001	0.01842					75	3972.67	99.99	0.83333	0.00012	0.83321
76	3538.64	89.07	0.01671	0.00013	0.01658					76	3929.69	98.91	0.83333	0.00012	0.83321
77	3666.91	92.3	0.01844	0.00012	0.01832					77	3972.5	99.99	0.83333	0.00011	0.83322
78	3821.02	96.17	0.01559	0.00011	0.01548					78	3968.8	99.89	0.83333	0.00011	0.83322
79	3518.04	88.55	0.01778	0.00013	0.01765					79	3973.01	100	0.83333	0.0001	0.83323
80	3423.73	86.17	0.01749	0.00014	0.01735					80	3969.12	99.9	0.83333	0.00014	0.83319
81	3505.15	88.22	0.01896	0.00015	0.01881					81	3973	100	0.83333	0.00011	0.83322
82	3687.57	92.82	0.01655	0.00011	0.01644					82	3970.41	99.93	0.83333	0.0001	0.83323
83	3549.17	89.33	0.01874	0.00011	0.01863					83	3973.01	100	0.83333	0.0001	0.83323
84	3530.4	88.86	0.01754	0.00015	0.01739					84	3972.67	99.99	0.83333	0.00015	0.83318
85	3747.08	94.31	0.01632	0.00014	0.01618					85	3967.18	99.85	0.83333	0.00012	0.83321
86	3535.06	88.98	0.01888	0.00011	0.01877					86	3972.67	99.99	0.83333	0.00013	0.8332
87	3488.43	87.8	0.01604	0.00012	0.01592					87	3969.12	99.9	0.83333	0.00014	0.83319
88	3908.6	98.38	0.017	0.00011	0.01689					88	3972.35	99.98	0.83333	0.00015	0.83318
89	3709.09	93.36	0.01781	0.00012	0.01769					89	3938.09	99.12	0.83333	0.00011	0.83322
90	3506.97	88.27	0.01893	0.0001	0.01883					90	3968.36	99.88	0.83333	0.00014	0.83319
91	3564.73	89.72	0.01813	0.00015	0.01798					91	3934.22	99.02	0.83333	0.00013	0.8332
92	3965.26	99.8	0.74848	0.00016	0.74832					92	3973.01	100	0.83333	0.00013	0.8332
93	3624.81	91.24	0.01585	0.00014	0.01571					93	3971.98	99.97	0.83333	0.00012	0.83321
94	3766.23	94.8	0.01515	0.00011	0.01504					94	3941.33	99.2	0.83333	0.0001	0.83323
95	3645.84	91.77	0.01678	0.00012	0.01666					95	3972.67	99.99	0.83333	0.00011	0.83322
96	3545.4	89.24	0.01878	0.00014	0.01864					96	3965.78	99.82	0.83333	0.00012	0.83321
97	3674.71	92.49	0.01721	0.00013	0.01708					97	3973	100	0.83333	0.00011	0.83322
98	3819.01	96.12	0.01399	0.00011	0.01388					98	3970.73	99.94	0.83333	0.0001	0.83323
99	3902.78	98.23	0.01652	0.00011	0.01641					99	3973	100	0.83333	0.00011	0.83322
100	3712.7	93.45	0.01783	0.00014	0.01769					100	3964.27	99.78	0.83333	0.00012	0.83321
101	3749.3	94.37	0.01635	0.00012	0.01623					101	3968.36	99.88	0.83333	0.00011	0.83322
102	3521.22	88.63	0.01712	0.00014	0.01698					102	3972.03	99.98	0.83333	0.0001	0.83323
103	3638.09	91.57	0.01753	0.00011	0.01742					103	3969.39	99.91	0.83333	0.00011	0.83322
104	3751.2	94.42	0.01844	0.00011	0.01833					104	3869.91	97.4	0.83333	0.0001	0.83323
105	3628.7	91.33	0.0172	0.00014	0.01706					105	3973.01	100	0.83333	0.00012	0.83321
106	3424.05	86.18	0.01975	0.00017	0.01958					106	3971.06	99.95	0.83333	0.00015	0.83318
107	3712.27	93.44	0.01937	0.00013	0.01924					107	3970.41	99.93	0.83333	0.00012	0.83321
108	3742.47	94.2	0.01822	0.00013	0.01809					108	3973	100	0.83333	0.0001	0.83323
109	3685.05	92.75	0.01643	0.00015	0.01628					109	3964.92	99.8	0.83333	0.00011	0.83322
110	3510.09	88.35	0.01839	0.00014	0.01825					110	3767.46	94.83	0.83333	0.00012	0.83321
111	3777.59	95.08	0.01882	0.00012	0.0187					111	3972.35	99.98	0.83333	0.00011	0.83322
112	3525.82	88.74	0.02049	0.00014	0.02035					112	3972.5	99.99	0.83333	0.00011	0.83322
113	3613.62	90.95	0.01814	0.00014	0.018					113	3972.67	99.99	0.83333	0.00012	0.83321
114	3728.45	93.84	0.01495	0.00013	0.01482					114	3973.01	100	0.83333	0.00013	0.8332
115	3685.3	92.76	0.0177	0.00012	0.01758					115	3971.98	99.97	0.83333	0.00011	0.83322
116	3386.25	85.23	0.01694	0.00014	0.0168					116	3971.46	99.96	0.83333	0.00012	0.83321
117	3484.72	87.71	0.01879	0.00016	0.01863					117	3972.35	99.98	0.83333	0.0001	0.83323
118	3546.69	89.27	0.01855	0.00012	0.01843					118	3972.03	99.98	0.83333	9e-05	0.83324
119	3744.95	94.26	0.01556	0.00012	0.01544					119	3970.41	99.93	0.83333	0.00012	0.83321
120	3528.65	88.82	0.01937	0.00012	0.01925					120	3972.67	99.99	0.83333	0.00014	0.83319
121	3641.94	91.67	0.01753	0.0001	0.01743					121	3972.35	99.98	0.83333	0.00012	0.83321
122	3529.56	88.84	0.02005	0.00012	0.01993					122	3973.01	100	0.83333	0.00011	0.83322
123	3827.07	96.33	0.01696	0.00011	0.01685					123	3972.5	99.99	0.83333	0.00012	0.83321
124	3836.86	96.57	0.01622	0.00011	0.01611					124	3846.64	96.82	0.83333	0.0001	0.83323
125	3706.36	93.29	0.01818	0.00013	0.01805					125	3972.5	99.99	0.83333	0.0001	0.83323
126	3513.16	88.43	0.0192	0.00012	0.01908					126	3970.73	99.94	0.83333	0.00011	0.83322
127	3660.9	92.14	0.01553	0.00014	0.01539					127	3959.1	99.65	0.83333	0.00012	0.83321
128	3576.26	90.01	0.01986	0.00011	0.01975					128	3973	100	0.83333	0.00012	0.83321
129	3610.44	90.87	0.01291	0.0001	0.01281					129	3972.67	99.99	0.83333	0.00012	0.83321
130	3504.09	88.2	0.01837	0.00013	0.01824					130	3972.5	99.99	0.83333	0.00011	0.83322
131	3671.98	92.42	0.01886	0.00012	0.01874					131	3972.5	99.99	0.83333	0.00011	0.83322
132	3438.44	86.55	0.01927	0.00014	0.01913					132	3972.5	99.99	0.83333	0.00012	0.83321
133	3445.4	86.72	0.01905	0.00013	0.01892					133	3769.08	94.87	0.83333	0.0001	0.83323
134	3929.32	98.9	0.01988	0.00012	0.01976					134	3959.05	99.65	0.83333	0.00013	0.8332
135	3446.69	86.75	0.0191	0.00014	0.01896					135	3972.67	99.99	0.83333	0.00012	0.83321
136	3467.93	87.29	0.01792	0.00015	0.01777					136	3970.73	99.94	0.83333	0.00011	0.83322
137	3903.22	98.24	0.01765	0.00011	0.01754					137	3972.35	99.98	0.83333	0.00011	0.83322
138	3581.45	90.14	0.01832	0.00012	0.0182					138	3906.42	98.32	0.83333	0.00011	0.83322
139	3963.3	99.76	0.75491	0.00013	0.75478					139	3932.92	98.99	0.83333	0.00012	0.83321
140	3679.38	92.61	0.01927	0.00013	0.01914					140	3973	100	0.83333	0.0001	0.83323
141	3570.31	89.86	0.02004	0.00012	0.01992					141	3968.8	99.89	0.83333	9e-05	0.83324
142	3564.79	89.73	0.01641	0.00014	0.01627					142	3972.35	99.98	0.83333	9e-05	0.83324
143	3784.27	95.25	0.0166	0.00012	0.01648					143	3972.35	99.98	0.83333	0.00011	0.83322
144	3645.32	91.75	0.01772	0.00015	0.01757					144	3971.46	99.96	0.83333	0.0001	0.83323
145	3377.87	85.02	0.02086	0.00014	0.02072					145	3965.24	99.8	0.83333	0.0001	0.83323
146	3568.85	89.83	0.0169	0.00011	0.01679					146	3967.84	99.87	0.83333	0.00011	0.83322
147	3477.91	87.54	0.01629	0.00014	0.01615					147	3971.46	99.96	0.83333	0.00012	0.83321
148	3644.47	91.73	0.0175	0.00016	0.01734					148	3972.35	99.98	0.83333	9e-05	0.83324
149	3729.3	93.87	0.01803	0.00014	0.01789					149	3972.67	99.99	0.83333	0.00012	0.83321
150	3567.71	89.8	0.01941	0.00011	0.0193					150	3973	100	0.83333	0.00015	0.83318
151	3657.82	92.07	0.01644	0.00012	0.01632					151	3971.98	99.97	0.83333	0.00013	0.8332
152	3559.49	89.59	0.0182	0.00015	0.01805					152	3963.3	99.76	0.83333	0.00015	0.83318
153	3601.84	90.66	0.01727	0.00013	0.01714					153	3971.98	99.97	0.83333	0.00012	0.83321
154	3650.06	91.87	0.01817	0.00011	0.01806					154	3968.88	99.9	0.83333	0.00012	0.83321
155	3659.85	92.12	0.01812	0.00013	0.01799					155	3972.35	99.98	0.83333	0.00014	0.83319
156	3598.58	90.58	0.01734	0.00013	0.01721					156	3972.03	99.98	0.83333	0.0001	0.83323
157	3714.14	93.48	0.01642	0.00014	0.01628					157	3967.18	99.85	0.83333	0.00011	0.83322
158	3491.64	87.88	0.01528	0.00013	0.01515					158	3967.5	99.86	0.83333	0.00014	0.83319
159	3877.73	97.6	0.0148	0.00012	0.01468					159	3970.73	99.94	0.83333	9e-05	0.83324
160	3417.11	86.01	0.01796	0.00013	0.01783					160	3968.36	99.88	0.83333	0.00011	0.83322
161	3638	91.57	0.01555	0.00014	0.01541					161	3972.5	99.99	0.83333	0.00011	0.83322
162	3759.06	94.62	0.01517	0.00012	0.01505					162	3973	100	0.83333	0.00013	0.8332
163	3733.53	93.97	0.01594	0.00013	0.01581					163	3971.98	99.97	0.83333	0.00012	0.83321
164	3540.81	89.12	0.01925	0.00015	0.0191					164	3957.48	99.61	0.83333	0.00013	0.8332
165	3599.39	90.6	0.03204	0.0001	0.03194					165	3965.24	99.8	0.83333	0.00013	0.8332
166	3686.48	92.79	0.01512	0.00013	0.01499					166	3755.51	94.53	0.83333	0.00011	0.83322
167	3573.94	89.96	0.01741	0.00014	0.01727					167	3969.76	99.92	0.83333	0.00014	0.83319
168	3525.01	88.72	0.01954	0.00016	0.01938					168	3966.86	99.85	0.83333	0.00013	0.8332
169	3691.93	92.93	0.01684	0.00012	0.01672					169	3965.78	99.82	0.83333	0.0001	0.83323
170	3752.01	94.44	0.01647	0.00013	0.01634					170	3965.78	99.82	0.83333	0.0001	0.83323
171	3569.32	89.84	0.01637	0.00012	0.01625					171	3972.35	99.98	0.83333	9e-05	0.83324
172	3722.2	93.69	0.01701	0.00014	0.01687					172	3972.67	99.99	0.83333	0.00011	0.83322
173	3607.37	90.8	0.01765	0.00014	0.01751					173	3972.67	99.99	0.83333	9e-05	0.83324
174	3595.96	90.51	0.01929	0.00014	0.01915					174	3968.36	99.88	0.83333	0.00013	0.8332
175	3593.29	90.44	0.01706	0.00013	0.01693					175	3953.28	99.5	0.83333	0.00012	0.83321
176	3611.32	90.9	0.01931	0.00014	0.01917					176	3944.23	99.28	0.83333	0.00012	0.83321
177	3547.94	89.3	0.01866	0.00011	0.01855					177	3970.73	99.94	0.83333	0.00012	0.83321
178	3403.28	85.66	0.01917	0.00012	0.01905					178	3966.86	99.85	0.83333	0.00014	0.83319
179	3765.8	94.78	0.01537	0.00014	0.01523					179	3961.04	99.7	0.83333	0.00012	0.83321
180	3771.9	94.94	0.01928	0.00011	0.01917					180	3967.5	99.86	0.83333	0.00011	0.83322
181	3459.63	87.08	0.02039	0.00014	0.02025					181	3972.5	99.99	0.83333	0.00012	0.83321
182	3784.08	95.24	0.01574	0.00011	0.01563					182	3966.86	99.85	0.83333	0.00013	0.8332
183	3419.14	86.06	0.01916	0.00014	0.01902					183	3972.03	99.98	0.83333	0.00011	0.83322
184	3631.51	91.4	0.01487	0.00011	0.01476					184	3919.82	98.66	0.83333	0.00012	0.83321
185	3525.89	88.75	0.0187	0.00011	0.01859					185	3972.67	99.99	0.83333	0.00014	0.83319
186	3521.47	88.63	0.01689	0.00013	0.01676					186	3931.95	98.97	0.83333	9e-05	0.83324
187	3654.66	91.99	0.01692	0.00014	0.01678					187	3972.67	99.99	0.83333	0.00011	0.83322
188	3696.63	93.04	0.0157	0.00013	0.01557					188	3970.09	99.93	0.83333	0.00013	0.8332
189	3541.08	89.13	0.01776	0.00015	0.01761					189	3972.35	99.98	0.83333	0.00012	0.83321
190	3487.57	87.78	0.01996	0.00011	0.01985					190	3972.35	99.98	0.83333	0.00015	0.83318
191	3459.86	87.08	0.01892	0.00015	0.01877					191	3936.16	99.07	0.83333	0.00012	0.83321
192	3793.01	95.47	0.01559	0.00011	0.01548					192	3953.61	99.51	0.83333	0.00011	0.83322
193	3626.06	91.27	0.0182	0.0001	0.0181					193	3972.67	99.99	0.83333	0.0001	0.83323
194	3612.43	90.92	0.01731	0.0001	0.01721					194	3973	100	0.83333	0.00012	0.83321
195	3560.19	89.61	0.01887	0.00013	0.01874					195	3966.56	99.84	0.83333	0.00012	0.83321
196	3699.56	93.12	0.01669	0.00013	0.01656					196	3965.78	99.82	0.83333	0.00013	0.8332
197	3603.51	90.7	0.01814	0.00013	0.01801					197	3941.65	99.21	0.83333	0.0001	0.83323
198	3636.08	91.52	0.01928	0.00014	0.01914					198	3971.06	99.95	0.83333	0.00011	0.83322
199	3445.88	86.73	0.01727	0.00013	0.01714					199	3955.87	99.57	0.83333	0.00011	0.83322
200	3637.59	91.56	0.02009	0.00014	0.01995					200	3963.62	99.76	0.83333	0.00011	0.83322

## Sheet: 02_BWACO_Seeds(2)
Fast Converegnce Exp							Fast Converegnce Exp			Slow Converegnce Exp							Slow Converegnce Exp
#	CBLF	Quality	Taumax	Taumin	DeltaTauminmax		Global Optimal Solution =	3960.61		#	CBLF	Quality	Taumax	Taumin	DeltaTauminmax		Global Optimal Solution =	3973.01
1	3570.27	89.86	0.01732	0.00015	0.01717		Minimum Optimal Solution =	3257.16		1	3966.86	99.85	0.83333	0.00013	0.8332		Minimum Optimal Solution =	3673.75
2	3420.31	86.09	0.01912	0.00012	0.019		Mean of Optimal Solution =	3632.52		2	3973	100	0.83333	0.00012	0.83321		Mean of Optimal Solution =	3960.26
3	3489.97	87.84	0.01774	0.00013	0.01761		Median of Optimal Solution =	3632.52		3	3971.46	99.96	0.83333	0.00013	0.8332		Median of Optimal Solution =	3960.26
4	3725.64	93.77	0.01828	0.00013	0.01815		Solution Standrad Deviation =	138.754		4	3968.47	99.89	0.83333	0.00011	0.83322		Solution Standrad Deviation =	36.3041
5	3708.6	93.34	0.01515	0.0001	0.01505		Average Price =	12.71		5	3956.95	99.6	0.83333	0.00012	0.83321		Average Price =	111.44
6	3835.6	96.54	0.01704	0.00013	0.01691		Relability =	0		6	3968.88	99.9	0.83333	0.00013	0.8332		Relability =	60.5
7	3770.99	94.92	0.01714	0.00012	0.01702		Normalized Price =	NA		7	3969.44	99.91	0.83333	0.00015	0.83318		Normalized Price =	184.198
8	3650.03	91.87	0.01724	0.00012	0.01712		Average Solution Quality =	91.43		8	3971.7	99.97	0.83333	0.00011	0.83322		Average Solution Quality =	99.6791
9	3839.66	96.64	0.01558	0.00011	0.01547		Average FDC =	-88.8942		9	3971.46	99.96	0.83333	0.00013	0.8332		Average FDC =	-531.374
10	3753.18	94.47	0.01768	0.00012	0.01756		Correlation Coefficent =	-1		10	3972.67	99.99	0.83333	0.0001	0.83323		Correlation Coefficent =	-0.92149
11	3901.62	98.2	0.01487	0.0001	0.01477		Solution Robustness =	26.1797		11	3922.91	98.74	0.83333	0.00011	0.83322		Solution Robustness =	109.086
12	3770.52	94.9	0.01659	0.00011	0.01648		Performance Rate =	0.00039339		12	3965.56	99.81	0.83333	0.00011	0.83322		Performance Rate =	0.0054289
13	3426.22	86.24	0.01831	0.00011	0.0182		Average Elapsed Time =	0.71275		13	3916.14	98.57	0.83333	0.0001	0.83323		Average Elapsed Time =	5.9228
14	3515.21	88.48	0.01774	0.00011	0.01763					14	3972.67	99.99	0.83333	0.00013	0.8332
15	3376.11	84.98	0.02044	0.00013	0.02031					15	3967.84	99.87	0.83333	0.00011	0.83322
16	3571.14	89.88	0.02083	0.00014	0.02069					16	3967.33	99.86	0.83333	0.00014	0.83319
17	3536.7	89.02	0.01723	0.00015	0.01708					17	3973.01	100	0.83333	0.00015	0.83318
18	3297.4	82.99	0.02126	0.00013	0.02113					18	3971.06	99.95	0.83333	0.00012	0.83321
19	3544.47	89.21	0.01959	0.00011	0.01948					19	3950.7	99.44	0.83333	0.00011	0.83322
20	3413.01	85.91	0.01811	0.00013	0.01798					20	3956.99	99.6	0.83333	0.00014	0.83319
21	3844.02	96.75	0.01656	0.00012	0.01644					21	3972.35	99.98	0.83333	0.00011	0.83322
22	3713.45	93.47	0.01936	0.00012	0.01924					22	3968.36	99.88	0.83333	0.0001	0.83323
23	3498.48	88.06	0.01813	0.00014	0.01799					23	3969.39	99.91	0.83333	0.00011	0.83322
24	3691.99	92.93	0.01634	0.00011	0.01623					24	3937.77	99.11	0.83333	0.0001	0.83323
25	3690.13	92.88	0.01478	0.00012	0.01466					25	3972.35	99.98	0.83333	0.0001	0.83323
26	3493.16	87.92	0.01794	0.00013	0.01781					26	3973.01	100	0.83333	0.00011	0.83322
27	3657.77	92.07	0.01857	0.00012	0.01845					27	3972.5	99.99	0.83333	0.0001	0.83323
28	3597.94	90.56	0.01916	0.00015	0.01901					28	3970.95	99.95	0.83333	0.0001	0.83323
29	3630	91.37	0.01836	0.00012	0.01824					29	3973	100	0.83333	0.00012	0.83321
30	3641.37	91.65	0.01758	0.00014	0.01744					30	3972.35	99.98	0.83333	0.00011	0.83322
31	3477.06	87.52	0.01729	0.00011	0.01718					31	3973.01	100	0.83333	0.00011	0.83322
32	3484.12	87.69	0.01668	0.00012	0.01656					32	3954.9	99.54	0.83333	0.00011	0.83322
33	3448.05	86.79	0.01878	0.00012	0.01866					33	3968.47	99.89	0.83333	0.00014	0.83319
34	3521.42	88.63	0.01751	0.00015	0.01736					34	3945.85	99.32	0.83333	0.00012	0.83321
35	3818.11	96.1	0.01683	0.00011	0.01672					35	3966.53	99.84	0.83333	0.00012	0.83321
36	3735.03	94.01	0.01719	0.00013	0.01706					36	3778.77	95.11	0.83333	0.00012	0.83321
37	3642.14	91.67	0.0173	0.00015	0.01715					37	3970.95	99.95	0.83333	0.00015	0.83318
38	3666.78	92.29	0.01729	0.00011	0.01718					38	3971.98	99.97	0.83333	0.00011	0.83322
39	3672.31	92.43	0.01611	0.0001	0.01601					39	3972.5	99.99	0.83333	0.00011	0.83322
40	3514.66	88.46	0.01933	0.00016	0.01917					40	3973	100	0.83333	0.00013	0.8332
41	3841.18	96.68	0.01576	0.0001	0.01566					41	3972.35	99.98	0.83333	0.00011	0.83322
42	3628.18	91.32	0.01761	0.00013	0.01748					42	3870.55	97.42	0.83333	0.0001	0.83323
43	3740.06	94.14	0.02155	0.00011	0.02144					43	3965.27	99.81	0.83333	0.00013	0.8332
44	3575	89.98	0.01783	0.00017	0.01766					44	3972.67	99.99	0.83333	0.00014	0.83319
45	3637.51	91.56	0.01685	0.00014	0.01671					45	3972.67	99.99	0.83333	0.00013	0.8332
46	3542.91	89.17	0.02053	0.00015	0.02038					46	3970.73	99.94	0.83333	0.00011	0.83322
47	3601.96	90.66	0.01773	0.00012	0.01761					47	3969.44	99.91	0.83333	0.00011	0.83322
48	3596.83	90.53	0.01907	0.00011	0.01896					48	3970.73	99.94	0.83333	0.00011	0.83322
49	3520.95	88.62	0.01662	0.00013	0.01649					49	3972.67	99.99	0.83333	0.00011	0.83322
50	3542.12	89.15	0.01795	0.00012	0.01783					50	3972.67	99.99	0.83333	0.00011	0.83322
51	3543.93	89.2	0.01964	0.00011	0.01953					51	3821.43	96.18	0.83333	0.0001	0.83323
52	3375.55	84.96	0.01833	0.00014	0.01819					52	3972.35	99.98	0.83333	0.00014	0.83319
53	3520.13	88.6	0.01842	0.00015	0.01827					53	3962.16	99.73	0.83333	0.00011	0.83322
54	3726.45	93.79	0.01721	0.00014	0.01707					54	3971.06	99.95	0.83333	0.00015	0.83318
55	3682.01	92.68	0.01504	0.00011	0.01493					55	3874.43	97.52	0.83333	0.00013	0.8332
56	3618.11	91.07	0.01742	0.00012	0.0173					56	3972.5	99.99	0.83333	0.00012	0.83321
57	3572.4	89.92	0.01772	0.00013	0.01759					57	3968.88	99.9	0.83333	0.00013	0.8332
58	3632.83	91.44	0.01586	0.00014	0.01572					58	3968.88	99.9	0.83333	0.00011	0.83322
59	3642.98	91.69	0.01478	0.0001	0.01468					59	3972.03	99.98	0.83333	0.00015	0.83318
60	3845.79	96.8	0.0129	0.00011	0.01279					60	3972.67	99.99	0.83333	0.00011	0.83322
61	3730.02	93.88	0.01544	0.00011	0.01533					61	3970.73	99.94	0.83333	0.00013	0.8332
62	3680.08	92.63	0.01887	0.00011	0.01876					62	3964.92	99.8	0.83333	0.00011	0.83322
63	3584.59	90.22	0.018	0.00012	0.01788					63	3946.65	99.34	0.83333	0.00011	0.83322
64	3537.67	89.04	0.01715	0.00015	0.017					64	3970.09	99.93	0.83333	0.00011	0.83322
65	3696.69	93.05	0.01964	0.00011	0.01953					65	3673.74	92.47	0.83333	0.0001	0.83323
66	3737.94	94.08	0.0195	9e-05	0.01941					66	3971.98	99.97	0.83333	0.00011	0.83322
67	3788.51	95.36	0.01934	0.00013	0.01921					67	3971.98	99.97	0.83333	0.0001	0.83323
68	3555.09	89.48	0.01542	0.00012	0.0153					68	3943.59	99.26	0.83333	0.00012	0.83321
69	3550.32	89.36	0.01763	0.00014	0.01749					69	3971.46	99.96	0.83333	0.00012	0.83321
70	3960.61	99.69	0.73324	0.00014	0.7331					70	3959.42	99.66	0.83333	0.00013	0.8332
71	3626.87	91.29	0.01933	0.00013	0.0192					71	3973.01	100	0.83333	0.00012	0.83321
72	3800.57	95.66	0.01908	0.00012	0.01896					72	3966.53	99.84	0.83333	0.00013	0.8332
73	3713.31	93.46	0.01745	0.00012	0.01733					73	3971.46	99.96	0.83333	0.0001	0.83323
74	3657.62	92.06	0.01998	0.00011	0.01987					74	3971.98	99.97	0.83333	0.00013	0.8332
75	3828.45	96.36	0.01599	0.00011	0.01588					75	3973	100	0.83333	0.00012	0.83321
76	3953.37	99.51	0.01456	0.00011	0.01445					76	3958.02	99.62	0.83333	0.0001	0.83323
77	3788.21	95.35	0.0159	0.00011	0.01579					77	3955.55	99.56	0.83333	9e-05	0.83324
78	3257.16	81.98	0.01737	0.00016	0.01721					78	3971.98	99.97	0.83333	0.00012	0.83321
79	3456.06	86.99	0.01766	0.00012	0.01754					79	3965.26	99.8	0.83333	0.00011	0.83322
80	3397.13	85.51	0.01706	0.00013	0.01693					80	3970.41	99.93	0.83333	9e-05	0.83324
81	3477.35	87.52	0.01816	0.00012	0.01804					81	3972.03	99.98	0.83333	0.00013	0.8332
82	3745.78	94.28	0.01551	0.00013	0.01538					82	3973.01	100	0.83333	0.00013	0.8332
83	3864.96	97.28	0.01658	0.0001	0.01648					83	3971.46	99.96	0.83333	0.00011	0.83322
84	3656.75	92.04	0.01916	0.00012	0.01904					84	3973.01	100	0.83333	0.0001	0.83323
85	3537.08	89.03	0.01751	0.00016	0.01735					85	3971.06	99.95	0.83333	0.0001	0.83323
86	3864.96	97.28	0.01529	0.0001	0.01519					86	3958.02	99.62	0.83333	0.0001	0.83323
87	3423.82	86.18	0.02164	0.00013	0.02151					87	3968.88	99.9	0.83333	9e-05	0.83324
88	3486.91	87.76	0.01833	0.00013	0.0182					88	3967.84	99.87	0.83333	0.00014	0.83319
89	3454.16	86.94	0.01864	0.00014	0.0185					89	3970.73	99.94	0.83333	0.00012	0.83321
90	3625.59	91.26	0.01925	0.0001	0.01915					90	3969.39	99.91	0.83333	0.00011	0.83322
91	3681.6	92.67	0.01915	0.0001	0.01905					91	3970.95	99.95	0.83333	0.00011	0.83322
92	3769.51	94.88	0.01442	0.00012	0.0143					92	3972.03	99.98	0.83333	0.00012	0.83321
93	3651.76	91.91	0.01846	0.00012	0.01834					93	3964.92	99.8	0.83333	0.00014	0.83319
94	3774.7	95.01	0.01664	0.00012	0.01652					94	3962.67	99.74	0.83333	0.0001	0.83323
95	3645.24	91.75	0.01683	0.00013	0.0167					95	3940.96	99.19	0.83333	0.00013	0.8332
96	3634.17	91.47	0.01775	0.00014	0.01761					96	3962.16	99.73	0.83333	0.00012	0.83321
97	3480.61	87.61	0.01802	0.00011	0.01791					97	3966.86	99.85	0.83333	0.00012	0.83321
98	3635.93	91.52	0.01813	0.00012	0.01801					98	3962.16	99.73	0.83333	0.00014	0.83319
99	3694.36	92.99	0.01805	0.0001	0.01795					99	3953.61	99.51	0.83333	0.00011	0.83322
100	3579.22	90.09	0.01885	0.00011	0.01874					100	3972.67	99.99	0.83333	0.00011	0.83322
101	3831.88	96.45	0.01493	0.00012	0.01481					101	3973.01	100	0.83333	0.00011	0.83322
102	3611.9	90.91	0.01732	0.00013	0.01719					102	3968.47	99.89	0.83333	0.00011	0.83322
103	3492.86	87.91	0.02536	0.00012	0.02524					103	3973	100	0.83333	0.00011	0.83322
104	3757.77	94.58	0.01545	0.00012	0.01533					104	3970.73	99.94	0.83333	0.00012	0.83321
105	3621.22	91.15	0.01612	0.00013	0.01599					105	3972.67	99.99	0.83333	0.00012	0.83321
106	3665.92	92.27	0.0174	0.00011	0.01729					106	3970.41	99.93	0.83333	0.00012	0.83321
107	3525.41	88.73	0.01843	0.00011	0.01832					107	3973	100	0.83333	0.00013	0.8332
108	3644.66	91.74	0.01838	0.00014	0.01824					108	3858.27	97.11	0.83333	9e-05	0.83324
109	3710.26	93.39	0.01886	0.00013	0.01873					109	3963.19	99.75	0.83333	0.00011	0.83322
110	3671.88	92.42	0.01728	0.00012	0.01716					110	3972.67	99.99	0.83333	0.00012	0.83321
111	3530.66	88.87	0.01707	0.00013	0.01694					111	3968.36	99.88	0.83333	0.00012	0.83321
112	3619.79	91.11	0.01995	0.00015	0.0198					112	3972.67	99.99	0.83333	0.00014	0.83319
113	3594.07	90.46	0.01629	0.00013	0.01616					113	3968.36	99.88	0.83333	0.00011	0.83322
114	3791.36	95.43	0.01854	0.0001	0.01844					114	3972.67	99.99	0.83333	0.00011	0.83322
115	3580.15	90.11	0.01681	0.00014	0.01667					115	3973.01	100	0.83333	0.00013	0.8332
116	3728.45	93.84	0.01747	0.0001	0.01737					116	3966.86	99.85	0.83333	0.00011	0.83322
117	3698.6	93.09	0.01641	0.00012	0.01629					117	3972.35	99.98	0.83333	0.00012	0.83321
118	3659.11	92.1	0.01481	0.00013	0.01468					118	3960.39	99.68	0.83333	0.00014	0.83319
119	3766.22	94.8	0.01835	0.00011	0.01824					119	3962.67	99.74	0.83333	0.00011	0.83322
120	3634.85	91.49	0.01682	0.00014	0.01668					120	3782.97	95.22	0.83333	0.00011	0.83322
121	3633.65	91.46	0.01618	0.00013	0.01605					121	3970.41	99.93	0.83333	0.00013	0.8332
122	3735.1	94.01	0.01896	0.00012	0.01884					122	3937.77	99.11	0.83333	0.0001	0.83323
123	3844.05	96.75	0.01598	0.00012	0.01586					123	3972.67	99.99	0.83333	0.00011	0.83322
124	3625.68	91.26	0.01659	0.00013	0.01646					124	3972.35	99.98	0.83333	0.00014	0.83319
125	3915.82	98.56	0.01958	9e-05	0.01949					125	3972.67	99.99	0.83333	0.0001	0.83323
126	3766.49	94.8	0.01739	0.0001	0.01729					126	3971.06	99.95	0.83333	0.00012	0.83321
127	3721.61	93.67	0.01609	0.00014	0.01595					127	3969.76	99.92	0.83333	0.0001	0.83323
128	3820.05	96.15	0.01537	0.00012	0.01525					128	3971.46	99.96	0.83333	0.00011	0.83322
129	3510.19	88.35	0.01909	0.00016	0.01893					129	3960.61	99.69	0.83333	0.0001	0.83323
130	3260.36	82.06	0.02278	0.00014	0.02264					130	3966.29	99.83	0.83333	0.0001	0.83323
131	3626.46	91.28	0.01931	0.00015	0.01916					131	3966.53	99.84	0.83333	0.00014	0.83319
132	3477.99	87.54	0.0191	0.00015	0.01895					132	3972.35	99.98	0.83333	0.00013	0.8332
133	3908.91	98.39	0.01738	0.00012	0.01726					133	3959.42	99.66	0.83333	0.00012	0.83321
134	3565.12	89.73	0.02031	0.00012	0.02019					134	3970.09	99.93	0.83333	0.0001	0.83323
135	3766.53	94.8	0.01525	0.00013	0.01512					135	3924.52	98.78	0.83333	0.00012	0.83321
136	3530.67	88.87	0.01701	0.00013	0.01688					136	3972.03	99.98	0.83333	0.00011	0.83322
137	3670.59	92.39	0.01931	0.00014	0.01917					137	3972.5	99.99	0.83333	0.0001	0.83323
138	3799.37	95.63	0.01829	0.00011	0.01818					138	3971.06	99.95	0.83333	0.00014	0.83319
139	3587.73	90.3	0.02282	0.00014	0.02268					139	3972.67	99.99	0.83333	9e-05	0.83324
140	3694.33	92.99	0.01833	0.00012	0.01821					140	3972.67	99.99	0.83333	0.00012	0.83321
141	3689.18	92.86	0.01755	0.00014	0.01741					141	3968.82	99.89	0.83333	0.00011	0.83322
142	3433.04	86.41	0.0188	0.00018	0.01862					142	3972.67	99.99	0.83333	0.00012	0.83321
143	3662.59	92.19	0.01573	0.00012	0.01561					143	3972.35	99.98	0.83333	0.0001	0.83323
144	3800.01	95.65	0.01727	0.00011	0.01716					144	3972.67	99.99	0.83333	0.00013	0.8332
145	3459.82	87.08	0.02079	0.00013	0.02066					145	3970.09	99.93	0.83333	0.00011	0.83322
146	3414.07	85.93	0.01836	0.00012	0.01824					146	3964.92	99.8	0.83333	9e-05	0.83324
147	3490.3	87.85	0.0186	0.00012	0.01848					147	3970.41	99.93	0.83333	0.00013	0.8332
148	3445.51	86.72	0.01778	0.00013	0.01765					148	3971.98	99.97	0.83333	0.00013	0.8332
149	3791.24	95.42	0.01663	0.00012	0.01651					149	3967.18	99.85	0.83333	0.00012	0.83321
150	3587.25	90.29	0.0182	0.00012	0.01808					150	3957.5	99.61	0.83333	0.00011	0.83322
151	3771.19	94.92	0.0176	0.00012	0.01748					151	3946.65	99.34	0.83333	0.00012	0.83321
152	3781.08	95.17	0.01389	0.0001	0.01379					152	3968.88	99.9	0.83333	0.0001	0.83323
153	3382.43	85.14	0.01869	0.00016	0.01853					153	3947.16	99.35	0.83333	0.00012	0.83321
154	3671.84	92.42	0.01697	0.00013	0.01684					154	3972.35	99.98	0.83333	0.00013	0.8332
155	3542.29	89.16	0.01698	0.00015	0.01683					155	3972.35	99.98	0.83333	0.00011	0.83322
156	3597.68	90.55	0.01575	0.00011	0.01564					156	3971.06	99.95	0.83333	0.00012	0.83321
157	3682.65	92.69	0.01664	0.00013	0.01651					157	3972.03	99.98	0.83333	0.00014	0.83319
158	3649.4	91.85	0.01658	0.00011	0.01647					158	3972.5	99.99	0.83333	0.00012	0.83321
159	3894.43	98.02	0.01467	0.00011	0.01456					159	3955.87	99.57	0.83333	0.00011	0.83322
160	3444.26	86.69	0.01966	0.00012	0.01954					160	3969.76	99.92	0.83333	0.00013	0.8332
161	3764.23	94.75	0.01793	0.0001	0.01783					161	3941.97	99.22	0.83333	0.0001	0.83323
162	3641.26	91.65	0.01654	0.00013	0.01641					162	3969.39	99.91	0.83333	0.00011	0.83322
163	3790.89	95.42	0.01478	0.00011	0.01467					163	3971.06	99.95	0.83333	0.0001	0.83323
164	3513.94	88.45	0.01854	0.00012	0.01842					164	3973	100	0.83333	9e-05	0.83324
165	3628.47	91.33	0.01712	0.00013	0.01699					165	3972.35	99.98	0.83333	0.00012	0.83321
166	3572.21	89.91	0.01877	0.00014	0.01863					166	3970.95	99.95	0.83333	0.00012	0.83321
167	3403.17	85.66	0.01903	0.00017	0.01886					167	3910.95	98.44	0.83333	0.00012	0.83321
168	3459.33	87.07	0.02036	0.00012	0.02024					168	3972.35	99.98	0.83333	0.0001	0.83323
169	3807.1	95.82	0.01591	0.00013	0.01578					169	3965.26	99.8	0.83333	0.00011	0.83322
170	3628.17	91.32	0.01974	0.00011	0.01963					170	3973.01	100	0.83333	0.00011	0.83322
171	3699.32	93.11	0.01784	0.00012	0.01772					171	3970.43	99.94	0.83333	0.00012	0.83321
172	3661.92	92.17	0.01743	0.00011	0.01732					172	3972.03	99.98	0.83333	0.00015	0.83318
173	3512.12	88.4	0.01803	0.00017	0.01786					173	3972.35	99.98	0.83333	0.00012	0.83321
174	3917.65	98.61	0.01599	0.0001	0.01589					174	3973	100	0.83333	0.0001	0.83323
175	3700.53	93.14	0.01331	0.0001	0.01321					175	3973	100	0.83333	0.00011	0.83322
176	3680.26	92.63	0.01648	0.0001	0.01638					176	3971.98	99.97	0.83333	0.0001	0.83323
177	3592.97	90.43	0.01564	0.00012	0.01552					177	3971.52	99.96	0.83333	0.00013	0.8332
178	3563.52	89.69	0.01593	0.00013	0.0158					178	3973.01	100	0.83333	0.00013	0.8332
179	3747.42	94.32	0.01233	9e-05	0.01224					179	3965.78	99.82	0.83333	0.00012	0.83321
180	3670.62	92.39	0.01821	0.0001	0.01811					180	3969.39	99.91	0.83333	0.00011	0.83322
181	3614.4	90.97	0.01864	0.00012	0.01852					181	3967.84	99.87	0.83333	0.00014	0.83319
182	3426.9	86.25	0.02133	0.00014	0.02119					182	3962.98	99.75	0.83333	0.00011	0.83322
183	3573.62	89.95	0.0164	0.00011	0.01629					183	3973.01	100	0.83333	0.00014	0.83319
184	3697.9	93.08	0.01697	0.00013	0.01684					184	3969.12	99.9	0.83333	0.00012	0.83321
185	3485.69	87.73	0.01885	0.00016	0.01869					185	3965.24	99.8	0.83333	0.00011	0.83322
186	3495.75	87.99	0.02117	0.00014	0.02103					186	3966.86	99.85	0.83333	0.00013	0.8332
187	3297.48	83	0.02035	0.00017	0.02018					187	3965.78	99.82	0.83333	0.0001	0.83323
188	3588.07	90.31	0.02067	0.00011	0.02056					188	3969.39	99.91	0.83333	0.00011	0.83322
189	3921.83	98.71	0.0186	0.00012	0.01848					189	3970.41	99.93	0.83333	0.00012	0.83321
190	3622.92	91.19	0.01949	0.0001	0.01939					190	3935.51	99.06	0.83333	0.00011	0.83322
191	3602.99	90.69	0.01739	0.00014	0.01725					191	3970.41	99.93	0.83333	0.00013	0.8332
192	3521.89	88.65	0.01796	0.00012	0.01784					192	3971.46	99.96	0.83333	0.00012	0.83321
193	3711.93	93.43	0.01553	0.00013	0.0154					193	3970.43	99.94	0.83333	0.00013	0.8332
194	3502.83	88.17	0.01912	0.00013	0.01899					194	3968.8	99.89	0.83333	0.00011	0.83322
195	3812.27	95.95	0.01433	0.00011	0.01422					195	3970.73	99.94	0.83333	0.00012	0.83321
196	3535.29	88.98	0.01763	0.00011	0.01752					196	3971.46	99.96	0.83333	0.0001	0.83323
197	3621.07	91.14	0.01808	0.0001	0.01798					197	3972.5	99.99	0.83333	0.00014	0.83319
198	3601.18	90.64	0.01982	0.00012	0.0197					198	3972.67	99.99	0.83333	0.00012	0.83321
199	3594.65	90.48	0.0208	0.00011	0.02069					199	3972.35	99.98	0.83333	0.00013	0.8332
200	3606.85	90.78	0.01757	0.0001	0.01747					200	3755.18	94.52	0.83333	0.0001	0.83323

## Sheet: 03_BWACO_Seeds(50)
Fast Converegnce Exp							Fast Converegnce Exp			Slow Converegnce Exp							Slow Converegnce Exp
#	CBLF	Quality	Taumax	Taumin	DeltaTauminmax		Global Optimal Solution =	3972.67		#	CBLF	Quality	Taumax	Taumin	DeltaTauminmax		Global Optimal Solution =	3973.01
1	3720.56	93.65	0.01662	0.00013	0.01649		Minimum Optimal Solution=	3294.78		1	3972.03	99.98	0.83333	0.00013	0.8332		Minimum Optimal Solution =	3769.08
2	3500.83	88.12	0.01803	0.00017	0.01786		Mean of Optimal Solution =	3622.15		2	3971.98	99.97	0.83333	0.00012	0.83321		Mean of Optimal Solution =	3960.96
3	3619.88	91.11	0.01688	0.00012	0.01676		Median of Optimal Solution =	3622.15		3	3930.66	98.93	0.83333	0.00011	0.83322		Median of Optimal Solution =	3960.96
4	3716.07	93.53	0.01625	0.00013	0.01612		Solution Standrad Deviation =	135.601		4	3973	100	0.83333	0.00011	0.83322		Solution Standrad Deviation =	28.7124
5	3635	91.49	0.01517	0.00012	0.01505		Average Price =	12.78		5	3972.35	99.98	0.83333	0.00012	0.83321		Average Price =	111.545
6	3562.39	89.66	0.01821	0.00014	0.01807		Relability =	1		6	3971.46	99.96	0.83333	0.0001	0.83323		Relability =	65
7	3862.07	97.21	0.02139	0.00011	0.02128		Normalized Price =	1278		7	3972.03	99.98	0.83333	0.0001	0.83323		Normalized Price =	171.608
8	3396.91	85.5	0.01666	0.00015	0.01651		Average Solution Quality =	91.169		8	3903.52	98.25	0.83333	0.00012	0.83321		Average Solution Quality =	99.6968
9	3638.31	91.58	0.01537	0.00012	0.01525		Average FDC =	-96.6226		9	3973	100	0.83333	0.00012	0.83321		Average FDC =	-523.392
10	3324.02	83.67	0.02095	0.00014	0.02081		Correlation Coefficent =	-1		10	3972.67	99.99	0.83333	0.0001	0.83323		Correlation Coefficent =	-0.92922
11	3586.8	90.28	0.01671	0.00013	0.01658		Solution Robustness =	26.7118		11	3970.73	99.94	0.83333	0.0001	0.83323		Solution Robustness =	137.953
12	3294.78	82.93	0.01829	0.00017	0.01812		Performance Rate =	0.00078247		12	3959.05	99.65	0.83333	0.00012	0.83321		Performance Rate =	0.0058272
13	3600.22	90.62	0.01906	0.00012	0.01894		Average Elapsed Time =	0.70772		13	3960.61	99.69	0.83333	0.00013	0.8332		Average Elapsed Time =	5.9176
14	3753.82	94.48	0.01645	0.00012	0.01633					14	3971.52	99.96	0.83333	0.00012	0.83321
15	3577.02	90.03	0.0178	0.00012	0.01768					15	3972.67	99.99	0.83333	0.00013	0.8332
16	3698.61	93.09	0.01607	0.0001	0.01597					16	3970.41	99.93	0.83333	0.00011	0.83322
17	3838.52	96.62	0.01623	0.00011	0.01612					17	3970.73	99.94	0.83333	0.00013	0.8332
18	3600.11	90.61	0.01707	0.00014	0.01693					18	3972.35	99.98	0.83333	0.0001	0.83323
19	3589.95	90.36	0.01545	0.0001	0.01535					19	3956.84	99.59	0.83333	0.00011	0.83322
20	3595.12	90.49	0.01676	0.00011	0.01665					20	3959.1	99.65	0.83333	0.0001	0.83323
21	3604.42	90.72	0.01654	0.00012	0.01642					21	3969.39	99.91	0.83333	0.00011	0.83322
22	3647.82	91.82	0.021	0.00014	0.02086					22	3961.68	99.71	0.83333	0.0001	0.83323
23	3711.96	93.43	0.01592	0.00012	0.0158					23	3967.18	99.85	0.83333	0.00013	0.8332
24	3724.71	93.75	0.01662	0.00014	0.01648					24	3966.53	99.84	0.83333	0.00012	0.83321
25	3482.39	87.65	0.0192	0.00014	0.01906					25	3972.67	99.99	0.83333	0.00014	0.83319
26	3396.05	85.48	0.02101	0.00015	0.02086					26	3946.65	99.34	0.83333	0.00015	0.83318
27	3816.08	96.05	0.01909	0.0001	0.01899					27	3970.41	99.93	0.83333	0.00012	0.83321
28	3451.4	86.87	0.01848	0.00018	0.0183					28	3964.27	99.78	0.83333	0.00013	0.8332
29	3543.36	89.19	0.01698	0.00012	0.01686					29	3963.3	99.76	0.83333	0.00014	0.83319
30	3681.73	92.67	0.02048	0.00012	0.02036					30	3962.67	99.74	0.83333	0.00012	0.83321
31	3600.57	90.63	0.01585	0.00013	0.01572					31	3972.67	99.99	0.83333	0.00013	0.8332
32	3542.47	89.16	0.01653	0.0001	0.01643					32	3972.67	99.99	0.83333	0.00014	0.83319
33	3597.94	90.56	0.01662	0.00013	0.01649					33	3967.84	99.87	0.83333	0.0001	0.83323
34	3679.24	92.61	0.01675	0.00013	0.01662					34	3970.41	99.93	0.83333	0.00013	0.8332
35	3563.04	89.68	0.01774	0.00015	0.01759					35	3970.73	99.94	0.83333	0.00013	0.8332
36	3424.08	86.18	0.02053	0.00012	0.02041					36	3963.71	99.77	0.83333	0.00013	0.8332
37	3624.68	91.23	0.01741	0.00015	0.01726					37	3963.19	99.75	0.83333	0.00012	0.83321
38	3576.47	90.02	0.01833	0.0001	0.01823					38	3969.91	99.92	0.83333	0.00013	0.8332
39	3726.94	93.81	0.01808	0.00012	0.01796					39	3972.35	99.98	0.83333	0.0001	0.83323
40	3607.1	90.79	0.01912	0.00015	0.01897					40	3972.67	99.99	0.83333	0.00013	0.8332
41	3496.64	88.01	0.01814	0.00015	0.01799					41	3939.39	99.15	0.83333	0.00012	0.83321
42	3670.62	92.39	0.01733	0.00013	0.0172					42	3968.88	99.9	0.83333	0.00012	0.83321
43	3675.42	92.51	0.01887	0.00013	0.01874					43	3973	100	0.83333	0.00011	0.83322
44	3585.77	90.25	0.01883	0.00011	0.01872					44	3971.98	99.97	0.83333	0.00012	0.83321
45	3684.22	92.73	0.01869	0.00011	0.01858					45	3949.41	99.41	0.83333	0.00011	0.83322
46	3830.24	96.41	0.01587	0.00011	0.01576					46	3968.36	99.88	0.83333	0.00012	0.83321
47	3742.82	94.21	0.0187	0.00013	0.01857					47	3969.12	99.9	0.83333	0.00011	0.83322
48	3816.36	96.06	0.01711	0.00012	0.01699					48	3973.01	100	0.83333	0.0001	0.83323
49	3622.98	91.19	0.01647	0.00014	0.01633					49	3903.19	98.24	0.83333	0.00012	0.83321
50	3419.78	86.08	0.01743	0.00012	0.01731					50	3963.3	99.76	0.83333	0.00011	0.83322
51	3780.56	95.16	0.01678	0.00013	0.01665					51	3970.41	99.93	0.83333	0.00014	0.83319
52	3684.69	92.74	0.01796	0.00013	0.01783					52	3972.35	99.98	0.83333	0.0001	0.83323
53	3623.97	91.21	0.01739	0.00011	0.01728					53	3901.58	98.2	0.83333	0.0001	0.83323
54	3659.59	92.11	0.01583	0.00013	0.0157					54	3953.28	99.5	0.83333	0.00012	0.83321
55	3653.48	91.96	0.01718	0.00012	0.01706					55	3973.01	100	0.83333	0.00012	0.83321
56	3579.49	90.1	0.01777	0.00012	0.01765					56	3837.27	96.58	0.83333	0.00012	0.83321
57	3476.48	87.5	0.01958	0.00014	0.01944					57	3968.8	99.89	0.83333	0.00013	0.8332
58	3476.75	87.51	0.01934	0.00014	0.0192					58	3972.67	99.99	0.83333	0.00011	0.83322
59	3607.03	90.79	0.01711	0.0001	0.01701					59	3971.46	99.96	0.83333	0.00011	0.83322
60	3448.79	86.81	0.01784	0.00013	0.01771					60	3928.03	98.87	0.83333	0.00011	0.83322
61	3818.55	96.11	0.01531	0.00011	0.0152					61	3972.67	99.99	0.83333	0.00011	0.83322
62	3806.79	95.82	0.01776	0.00013	0.01763					62	3972.67	99.99	0.83333	0.00012	0.83321
63	3884.09	97.76	0.01479	0.00012	0.01467					63	3966.53	99.84	0.83333	0.00011	0.83322
64	3500.03	88.1	0.01841	0.00012	0.01829					64	3970.41	99.93	0.83333	0.00013	0.8332
65	3592.18	90.41	0.01808	0.00014	0.01794					65	3970.95	99.95	0.83333	0.00014	0.83319
66	3524.59	88.71	0.0196	0.00016	0.01944					66	3968.88	99.9	0.83333	0.00012	0.83321
67	3832.77	96.47	0.01578	0.00012	0.01566					67	3973	100	0.83333	0.00014	0.83319
68	3875.87	97.55	0.0163	0.00011	0.01619					68	3956.84	99.59	0.83333	0.00011	0.83322
69	3686.41	92.79	0.01877	0.00013	0.01864					69	3973	100	0.83333	0.00014	0.83319
70	3755.58	94.53	0.01723	0.00015	0.01708					70	3966.86	99.85	0.83333	0.0001	0.83323
71	3482.42	87.65	0.01894	0.00015	0.01879					71	3959.42	99.66	0.83333	9e-05	0.83324
72	3335.64	83.96	0.02017	0.00019	0.01998					72	3971.06	99.95	0.83333	0.00013	0.8332
73	3569.77	89.85	0.01817	0.00012	0.01805					73	3970.73	99.94	0.83333	0.00014	0.83319
74	3481.76	87.64	0.01801	0.00015	0.01786					74	3968.15	99.88	0.83333	0.00011	0.83322
75	3519.03	88.57	0.01873	0.00013	0.0186					75	3971.46	99.96	0.83333	0.00011	0.83322
76	3641.52	91.66	0.01839	0.00013	0.01826					76	3949.73	99.41	0.83333	0.0001	0.83323
77	3783.65	95.23	0.01548	0.00012	0.01536					77	3970.41	99.93	0.83333	0.00011	0.83322
78	3602.95	90.69	0.01896	0.00012	0.01884					78	3973	100	0.83333	0.0001	0.83323
79	3865.73	97.3	0.01624	0.0001	0.01614					79	3914.83	98.54	0.83333	0.00011	0.83322
80	3330.93	83.84	0.02054	0.00015	0.02039					80	3961.36	99.71	0.83333	0.00011	0.83322
81	3874.78	97.53	0.01797	0.00011	0.01786					81	3969.76	99.92	0.83333	0.00012	0.83321
82	3565.4	89.74	0.0188	0.00013	0.01867					82	3969.12	99.9	0.83333	0.00011	0.83322
83	3511.34	88.38	0.01942	0.00013	0.01929					83	3972.5	99.99	0.83333	0.00013	0.8332
84	3412.19	85.88	0.01932	0.00015	0.01917					84	3972.67	99.99	0.83333	0.00013	0.8332
85	3462.44	87.15	0.01903	0.00012	0.01891					85	3864.09	97.26	0.83333	0.0001	0.83323
86	3458.47	87.05	0.02103	0.00016	0.02087					86	3972.17	99.98	0.83333	0.00011	0.83322
87	3570.75	89.88	0.02192	0.00011	0.02181					87	3769.08	94.87	0.83333	0.00013	0.8332
88	3771.79	94.94	0.01523	0.00013	0.0151					88	3971.06	99.95	0.83333	0.00012	0.83321
89	3864.96	97.28	0.01442	0.0001	0.01432					89	3972.35	99.98	0.83333	0.00011	0.83322
90	3523.2	88.68	0.01816	0.00017	0.01799					90	3973	100	0.83333	0.00013	0.8332
91	3585.3	90.24	0.01792	0.00011	0.01781					91	3910.62	98.43	0.83333	0.0001	0.83323
92	3617.03	91.04	0.0184	0.00013	0.01827					92	3973.01	100	0.83333	0.00012	0.83321
93	3806.01	95.8	0.01547	0.0001	0.01537					93	3969.39	99.91	0.83333	0.0001	0.83323
94	3607.26	90.79	0.01676	0.00012	0.01664					94	3971.98	99.97	0.83333	0.00012	0.83321
95	3588.32	90.32	0.01469	0.00012	0.01457					95	3955.55	99.56	0.83333	0.00013	0.8332
96	3360.51	84.58	0.01852	0.00013	0.01839					96	3970.41	99.93	0.83333	0.00013	0.8332
97	3497.32	88.03	0.01692	0.00011	0.01681					97	3959.75	99.67	0.83333	0.00014	0.83319
98	3849.71	96.9	0.01611	0.00013	0.01598					98	3971.98	99.97	0.83333	0.00013	0.8332
99	3771.39	94.93	0.01713	0.00012	0.01701					99	3970.41	99.93	0.83333	0.00013	0.8332
100	3561.18	89.63	0.01857	0.00014	0.01843					100	3945.53	99.31	0.83333	0.00011	0.83322
101	3384.87	85.2	0.01836	0.00016	0.0182					101	3972.67	99.99	0.83333	0.00012	0.83321
102	3625.82	91.26	0.01627	0.0001	0.01617					102	3969.12	99.9	0.83333	0.00014	0.83319
103	3612.34	90.92	0.01694	0.00013	0.01681					103	3969.12	99.9	0.83333	0.00011	0.83322
104	3554.4	89.46	0.01863	0.00013	0.0185					104	3972.5	99.99	0.83333	0.00014	0.83319
105	3534.36	88.96	0.018	0.00012	0.01788					105	3972.67	99.99	0.83333	0.00011	0.83322
106	3460.59	87.1	0.01898	0.00015	0.01883					106	3972.35	99.98	0.83333	0.00011	0.83322
107	3799.52	95.63	0.01465	0.00012	0.01453					107	3970.73	99.94	0.83333	0.00014	0.83319
108	3669.31	92.36	0.01714	0.00014	0.017					108	3972.35	99.98	0.83333	0.00012	0.83321
109	3549.24	89.33	0.017	0.00011	0.01689					109	3972.67	99.99	0.83333	0.00012	0.83321
110	3494.46	87.95	0.01902	0.00013	0.01889					110	3818.85	96.12	0.83333	0.00011	0.83322
111	3729.09	93.86	0.01549	0.00012	0.01537					111	3972.5	99.99	0.83333	0.0001	0.83323
112	3850.65	96.92	0.0185	0.00011	0.01839					112	3972.03	99.98	0.83333	0.00011	0.83322
113	3613.48	90.95	0.01904	0.00013	0.01891					113	3969.91	99.92	0.83333	0.00013	0.8332
114	3628.6	91.33	0.01673	0.00012	0.01661					114	3968.8	99.89	0.83333	0.00011	0.83322
115	3645.32	91.75	0.01898	0.00014	0.01884					115	3972.5	99.99	0.83333	0.00013	0.8332
116	3651.14	91.9	0.01827	0.00014	0.01813					116	3972.67	99.99	0.83333	0.00011	0.83322
117	3498.35	88.05	0.01787	0.00013	0.01774					117	3970.73	99.94	0.83333	0.00013	0.8332
118	3476.37	87.5	0.01665	0.00015	0.0165					118	3971.46	99.96	0.83333	0.0001	0.83323
119	3496.61	88.01	0.01913	0.00012	0.01901					119	3972.67	99.99	0.83333	0.00012	0.83321
120	3695.69	93.02	0.01792	0.00011	0.01781					120	3970.95	99.95	0.83333	0.00013	0.8332
121	3646.07	91.77	0.01751	0.00015	0.01736					121	3897.38	98.1	0.83333	0.00013	0.8332
122	3504.45	88.21	0.01811	0.00012	0.01799					122	3965.78	99.82	0.83333	0.00013	0.8332
123	3665.92	92.27	0.0166	0.00012	0.01648					123	3970.09	99.93	0.83333	0.0001	0.83323
124	3686.13	92.78	0.01614	0.00012	0.01602					124	3962.16	99.73	0.83333	0.00013	0.8332
125	3675.23	92.5	0.01655	0.00014	0.01641					125	3971.06	99.95	0.83333	0.00013	0.8332
126	3799.46	95.63	0.01613	0.00011	0.01602					126	3972.03	99.98	0.83333	0.00011	0.83322
127	3776.98	95.07	0.01778	0.00013	0.01765					127	3972.35	99.98	0.83333	0.00011	0.83322
128	3671.42	92.41	0.01904	0.00011	0.01893					128	3972.35	99.98	0.83333	0.0001	0.83323
129	3664.45	92.23	0.01794	0.00011	0.01783					129	3972.5	99.99	0.83333	0.00011	0.83322
130	3578.18	90.06	0.01679	0.00013	0.01666					130	3971.06	99.95	0.83333	0.00012	0.83321
131	3752.46	94.45	0.01551	0.0001	0.01541					131	3970.41	99.93	0.83333	0.00012	0.83321
132	3633.03	91.44	0.01814	0.00012	0.01802					132	3967.18	99.85	0.83333	0.00012	0.83321
133	3756.65	94.55	0.01514	0.00013	0.01501					133	3972.35	99.98	0.83333	0.00012	0.83321
134	3802.86	95.72	0.01795	0.00011	0.01784					134	3972.35	99.98	0.83333	0.00012	0.83321
135	3712.83	93.45	0.01647	0.0001	0.01637					135	3956.47	99.58	0.83333	0.00012	0.83321
136	3972.67	99.99	0.76555	0.00011	0.76544					136	3972.67	99.99	0.83333	0.00011	0.83322
137	3646.08	91.77	0.01627	0.00012	0.01615					137	3973.01	100	0.83333	0.00013	0.8332
138	3651.71	91.91	0.0162	0.00011	0.01609					138	3973	100	0.83333	0.00012	0.83321
139	3663.34	92.21	0.01653	0.00012	0.01641					139	3971.06	99.95	0.83333	0.0001	0.83323
140	3705.68	93.27	0.01531	9e-05	0.01522					140	3972.35	99.98	0.83333	0.00011	0.83322
141	3394.66	85.44	0.01658	0.00011	0.01647					141	3970.09	99.93	0.83333	0.00011	0.83322
142	3717.76	93.58	0.01698	0.00012	0.01686					142	3970.09	99.93	0.83333	0.00012	0.83321
143	3553.66	89.45	0.01928	0.00011	0.01917					143	3964.22	99.78	0.83333	0.00014	0.83319
144	3786.9	95.32	0.0174	0.0001	0.0173					144	3972.5	99.99	0.83333	0.00013	0.8332
145	3801.4	95.68	0.01432	0.00012	0.0142					145	3973	100	0.83333	0.00014	0.83319
146	3832.21	96.46	0.01501	0.00012	0.01489					146	3970.09	99.93	0.83333	0.00012	0.83321
147	3492.45	87.9	0.01903	0.00012	0.01891					147	3972.5	99.99	0.83333	0.00013	0.8332
148	3575.59	90	0.0183	0.00013	0.01817					148	3972.67	99.99	0.83333	0.00011	0.83322
149	3408.79	85.8	0.01912	0.00015	0.01897					149	3952.85	99.49	0.83333	0.00012	0.83321
150	3485.96	87.74	0.01798	0.00013	0.01785					150	3968.15	99.88	0.83333	0.00014	0.83319
151	3480.82	87.61	0.0159	0.00014	0.01576					151	3972.67	99.99	0.83333	0.00011	0.83322
152	3525.82	88.74	0.01882	0.00011	0.01871					152	3971.46	99.96	0.83333	0.00011	0.83322
153	3626.47	91.28	0.01988	0.00012	0.01976					153	3930.01	98.92	0.83333	0.00012	0.83321
154	3474.64	87.46	0.02101	0.00013	0.02088					154	3969.39	99.91	0.83333	0.00011	0.83322
155	3479.8	87.59	0.01513	0.00014	0.01499					155	3972.35	99.98	0.83333	0.00011	0.83322
156	3438.44	86.55	0.01859	0.00017	0.01842					156	3972.67	99.99	0.83333	0.00011	0.83322
157	3791.17	95.42	0.01593	0.0001	0.01583					157	3972.67	99.99	0.83333	0.00013	0.8332
158	3589.7	90.35	0.01754	0.00011	0.01743					158	3972.35	99.98	0.83333	0.00011	0.83322
159	3971.98	99.97	0.83333	0.00018	0.83315					159	3973.01	100	0.83333	0.0001	0.83323
160	3854.82	97.03	0.01426	0.00011	0.01415					160	3959.42	99.66	0.83333	0.0001	0.83323
161	3580.54	90.12	0.0211	0.00015	0.02095					161	3972.67	99.99	0.83333	0.00012	0.83321
162	3735.44	94.02	0.02759	0.00014	0.02745					162	3972.35	99.98	0.83333	0.00011	0.83322
163	3502.24	88.15	0.01676	0.00012	0.01664					163	3963.71	99.77	0.83333	0.00013	0.8332
164	3730.02	93.88	0.01726	0.00013	0.01713					164	3968.5	99.89	0.83333	9e-05	0.83324
165	3570.38	89.87	0.02044	0.00013	0.02031					165	3965.26	99.8	0.83333	0.0001	0.83323
166	3710.73	93.4	0.01616	0.00011	0.01605					166	3970.09	99.93	0.83333	0.0001	0.83323
167	3472.71	87.41	0.01826	0.00016	0.0181					167	3953.28	99.5	0.83333	0.00011	0.83322
168	3716.08	93.53	0.0171	0.00013	0.01697					168	3885.74	97.8	0.83333	0.00012	0.83321
169	3504.88	88.22	0.01743	0.00011	0.01732					169	3970.73	99.94	0.83333	0.00013	0.8332
170	3680.93	92.65	0.01683	0.00013	0.0167					170	3965.24	99.8	0.83333	0.00013	0.8332
171	3479.57	87.58	0.0196	0.00013	0.01947					171	3969.12	99.9	0.83333	0.00011	0.83322
172	3412.36	85.89	0.01771	0.00012	0.01759					172	3961.36	99.71	0.83333	0.00014	0.83319
173	3555.33	89.49	0.016	0.00011	0.01589					173	3972.35	99.98	0.83333	0.00013	0.8332
174	3638.54	91.58	0.0177	0.00013	0.01757					174	3972.67	99.99	0.83333	0.00013	0.8332
175	3761.29	94.67	0.01803	0.00012	0.01791					175	3971.98	99.97	0.83333	0.00011	0.83322
176	3514.89	88.47	0.01594	0.0001	0.01584					176	3972.03	99.98	0.83333	0.0001	0.83323
177	3630.39	91.38	0.01795	0.00014	0.01781					177	3910.62	98.43	0.83333	0.00012	0.83321
178	3732.94	93.96	0.01657	0.00011	0.01646					178	3972.5	99.99	0.83333	0.00012	0.83321
179	3684.07	92.73	0.01817	0.00014	0.01803					179	3970.41	99.93	0.83333	0.0001	0.83323
180	3616.86	91.04	0.01671	0.00013	0.01658					180	3973	100	0.83333	0.0001	0.83323
181	3634.27	91.47	0.02028	0.00012	0.02016					181	3972.35	99.98	0.83333	0.00013	0.8332
182	3638.24	91.57	0.01856	0.00013	0.01843					182	3884.61	97.77	0.83333	0.0001	0.83323
183	3747.2	94.32	0.01658	0.00013	0.01645					183	3970.95	99.95	0.83333	0.0001	0.83323
184	3564.17	89.71	0.01351	0.00013	0.01338					184	3973	100	0.83333	0.00012	0.83321
185	3558.81	89.57	0.01576	0.00012	0.01564					185	3941.92	99.22	0.83333	0.00012	0.83321
186	3472.58	87.4	0.01816	0.00015	0.01801					186	3972.5	99.99	0.83333	0.00012	0.83321
187	3493.9	87.94	0.01606	0.00011	0.01595					187	3970.09	99.93	0.83333	0.00014	0.83319
188	3679.71	92.62	0.01728	0.00012	0.01716					188	3967.84	99.87	0.83333	0.00011	0.83322
189	3851.52	96.94	0.01669	0.00011	0.01658					189	3971.98	99.97	0.83333	0.00014	0.83319
190	3555.09	89.48	0.01877	0.00013	0.01864					190	3891.56	97.95	0.83333	0.00011	0.83322
191	3451.91	86.88	0.01951	0.00012	0.01939					191	3973.01	100	0.83333	0.00012	0.83321
192	3682.23	92.68	0.01762	0.00013	0.01749					192	3959.75	99.67	0.83333	0.00011	0.83322
193	3513.78	88.44	0.01752	0.00015	0.01737					193	3972.35	99.98	0.83333	0.00012	0.83321
194	3534.6	88.97	0.01981	0.00013	0.01968					194	3972.35	99.98	0.83333	0.00013	0.8332
195	3875.74	97.55	0.01393	0.00012	0.01381					195	3971.98	99.97	0.83333	0.00012	0.83321
196	3829.81	96.4	0.01697	0.00013	0.01684					196	3973	100	0.83333	0.00013	0.8332
197	3480.88	87.61	0.01989	0.00014	0.01975					197	3972.67	99.99	0.83333	0.00013	0.8332
198	3520.16	88.6	0.01768	0.00013	0.01755					198	3962.16	99.73	0.83333	0.00011	0.83322
199	3554.76	89.47	0.0173	0.0001	0.0172					199	3968.47	99.89	0.83333	0.00012	0.83321
200	3543.77	89.2	0.02049	0.00011	0.02038					200	3807.21	95.83	0.83333	0.0001	0.83323

## Sheet: 04_BWACO_Seeds(75)
Fast Converegnce Exp							Fast Converegnce Exp			Slow Converegnce Exp							Slow Converegnce Exp
#	CBLF	Quality	Taumax	Taumin	DeltaTauminmax		Global Optimal Solution =	3972.35		#	CBLF	Quality	Taumax	Taumin	DeltaTauminmax		Global Optimal Solution =	3973.01
1	3741.45	94.17	0.01492	0.00012	0.0148		Minimum Optimal Solution =	3338.3		1	3972.35	99.98	0.83333	0.00012	0.83321		Minimum Optimal Solution =	3679.24
2	3593.48	90.45	0.01769	0.00015	0.01754		Mean of Optimal Solution =	3630.49		2	3970.73	99.94	0.83333	0.00013	0.8332		Mean of Optimal Solution =	3960.07
3	3695.43	93.01	0.01799	0.00014	0.01785		Median of Optimal Solution =	3630.49		3	3970.41	99.93	0.83333	0.0001	0.83323		Median of Optimal Solution =	3960.07
4	3836.86	96.57	0.01641	0.00013	0.01628		Solution Standrad Deviation =	131.936		4	3955.55	99.56	0.83333	0.00012	0.83321		Solution Standrad Deviation =	34.1557
5	3748.31	94.34	0.01622	0.00013	0.01609		Average Price =	12.435		5	3972.35	99.98	0.83333	0.00012	0.83321		Average Price =	111.995
6	3500.1	88.1	0.01943	0.00015	0.01928		Relability =	0.5		6	3970.73	99.94	0.83333	0.00013	0.8332		Relability =	58
7	3514.76	88.47	0.01778	0.00012	0.01766		Normalized Price =	2487		7	3969.58	99.91	0.83333	0.00012	0.83321		Normalized Price =	193.095
8	3545.46	89.24	0.01679	0.00013	0.01666		Average Solution Quality =	91.3787		8	3972.5	99.99	0.83333	0.0001	0.83323		Average Solution Quality =	99.6743
9	3445.59	86.72	0.01607	0.00012	0.01595		Average FDC =	-109.164		9	3962.98	99.75	0.83333	0.00012	0.83321		Average FDC =	-527.663
10	3685.09	92.75	0.01923	0.00013	0.0191		Correlation Coefficent =	-1		10	3966.86	99.85	0.83333	0.00014	0.83319		Correlation Coefficent =	-0.92221
11	3526.84	88.77	0.02009	0.00012	0.01997		Solution Robustness =	27.5171		11	3967.84	99.87	0.83333	0.00012	0.83321		Solution Robustness =	115.942
12	3525.7	88.74	0.01833	0.00016	0.01817		Performance Rate =	0.00040209		12	3971.46	99.96	0.83333	0.00011	0.83322		Performance Rate =	0.0051788
13	3557.48	89.54	0.01736	0.00013	0.01723		Average Elapsed Time =	0.69836		13	3972.03	99.98	0.83333	0.00012	0.83321		Average Elapsed Time =	5.9388
14	3657.18	92.05	0.0182	0.00013	0.01807					14	3972.5	99.99	0.83333	0.0001	0.83323
15	3549.76	89.35	0.01845	0.00012	0.01833					15	3971.46	99.96	0.83333	0.00013	0.8332
16	3943.55	99.26	0.01628	0.00012	0.01616					16	3973.01	100	0.83333	0.00013	0.8332
17	3450.27	86.84	0.02815	0.00013	0.02802					17	3967.18	99.85	0.83333	0.00012	0.83321
18	3530.99	88.87	0.02016	0.00011	0.02005					18	3973	100	0.83333	0.00011	0.83322
19	3598.42	90.57	0.01924	0.00012	0.01912					19	3972.35	99.98	0.83333	0.0001	0.83323
20	3640.99	91.64	0.01961	0.00013	0.01948					20	3971.98	99.97	0.83333	0.00012	0.83321
21	3338.3	84.02	0.01763	0.00013	0.0175					21	3931.95	98.97	0.83333	0.0001	0.83323
22	3832.37	96.46	0.01616	0.00012	0.01604					22	3973	100	0.83333	0.00013	0.8332
23	3842.49	96.71	0.01606	0.00012	0.01594					23	3972.03	99.98	0.83333	9e-05	0.83324
24	3531.97	88.9	0.02139	0.00011	0.02128					24	3967.84	99.87	0.83333	0.0001	0.83323
25	3421.63	86.12	0.01849	0.00013	0.01836					25	3956.99	99.6	0.83333	0.00014	0.83319
26	3796.72	95.56	0.01601	0.0001	0.01591					26	3973	100	0.83333	0.0001	0.83323
27	3711.04	93.41	0.01698	0.00011	0.01687					27	3970.73	99.94	0.83333	0.00011	0.83322
28	3469.47	87.33	0.02104	0.00013	0.02091					28	3968.47	99.89	0.83333	0.00014	0.83319
29	3730.54	93.9	0.01525	0.00012	0.01513					29	3972.35	99.98	0.83333	0.00013	0.8332
30	3498.28	88.05	0.01886	0.00015	0.01871					30	3940.03	99.17	0.83333	0.00012	0.83321
31	3733.13	93.96	0.01705	0.00013	0.01692					31	3865.38	97.29	0.83333	0.00014	0.83319
32	3669.9	92.37	0.01956	0.00011	0.01945					32	3972.67	99.99	0.83333	0.00014	0.83319
33	3637.92	91.57	0.01783	0.00013	0.0177					33	3950.27	99.43	0.83333	0.00012	0.83321
34	3605.35	90.75	0.0162	0.00013	0.01607					34	3903.19	98.24	0.83333	0.0001	0.83323
35	3600.92	90.63	0.01699	0.00012	0.01687					35	3922.58	98.73	0.83333	0.00012	0.83321
36	3495.69	87.99	0.01871	0.00016	0.01855					36	3973.01	100	0.83333	0.00012	0.83321
37	3572.45	89.92	0.01737	0.00013	0.01724					37	3940.96	99.19	0.83333	0.00011	0.83322
38	3602.19	90.67	0.02006	0.00014	0.01992					38	3964.92	99.8	0.83333	0.00012	0.83321
39	3644.14	91.72	0.01682	0.00013	0.01669					39	3972.5	99.99	0.83333	0.0001	0.83323
40	3861.65	97.2	0.02072	0.0001	0.02062					40	3971.38	99.96	0.83333	0.00011	0.83322
41	3462.26	87.14	0.02114	0.00012	0.02102					41	3869.26	97.39	0.83333	0.00012	0.83321
42	3660.68	92.14	0.01631	0.00012	0.01619					42	3970.73	99.94	0.83333	0.00011	0.83322
43	3571.41	89.89	0.01803	0.00015	0.01788					43	3972.03	99.98	0.83333	0.00011	0.83322
44	3628.75	91.33	0.01832	0.00013	0.01819					44	3902.55	98.23	0.83333	0.00012	0.83321
45	3747.45	94.32	0.01603	0.00012	0.01591					45	3941.97	99.22	0.83333	0.00011	0.83322
46	3628.6	91.33	0.01715	0.00014	0.01701					46	3968.8	99.89	0.83333	0.00011	0.83322
47	3592.4	90.42	0.01474	0.0001	0.01464					47	3972.67	99.99	0.83333	0.00013	0.8332
48	3620.56	91.13	0.01629	0.00012	0.01617					48	3972.35	99.98	0.83333	0.00013	0.8332
49	3786.64	95.31	0.02072	0.0001	0.02062					49	3963.71	99.77	0.83333	0.00011	0.83322
50	3754.85	94.51	0.01898	0.00011	0.01887					50	3972.67	99.99	0.83333	0.0001	0.83323
51	3685.3	92.76	0.01626	0.00013	0.01613					51	3887.36	97.84	0.83333	0.0001	0.83323
52	3633.87	91.46	0.01696	0.00013	0.01683					52	3708.65	93.35	0.83333	0.00012	0.83321
53	3672.87	92.45	0.01883	9e-05	0.01874					53	3971.98	99.97	0.83333	0.00011	0.83322
54	3429.14	86.31	0.01893	0.00012	0.01881					54	3972.67	99.99	0.83333	0.00013	0.8332
55	3544.6	89.22	0.02168	0.00016	0.02152					55	3973	100	0.83333	0.00011	0.83322
56	3665.88	92.27	0.01671	0.00011	0.0166					56	3965.56	99.81	0.83333	0.00013	0.8332
57	3933.72	99.01	0.01641	0.00011	0.0163					57	3970.43	99.94	0.83333	0.00011	0.83322
58	3516.73	88.52	0.01862	0.0001	0.01852					58	3959.05	99.65	0.83333	0.00011	0.83322
59	3940.44	99.18	0.01805	0.00013	0.01792					59	3972.67	99.99	0.83333	0.00011	0.83322
60	3646.79	91.79	0.01825	0.00013	0.01812					60	3965.24	99.8	0.83333	0.00013	0.8332
61	3822.37	96.21	0.01706	0.0001	0.01696					61	3972.35	99.98	0.83333	0.00011	0.83322
62	3802.45	95.71	0.01491	0.0001	0.01481					62	3969.12	99.9	0.83333	0.0001	0.83323
63	3650	91.87	0.01777	0.00013	0.01764					63	3972.67	99.99	0.83333	0.00013	0.8332
64	3514.74	88.47	0.01706	0.00014	0.01692					64	3679.24	92.61	0.83333	0.00012	0.83321
65	3839.85	96.65	0.01698	0.00012	0.01686					65	3972.67	99.99	0.83333	0.00012	0.83321
66	3702.07	93.18	0.01576	0.00011	0.01565					66	3971.46	99.96	0.83333	0.00011	0.83322
67	3677.44	92.56	0.01671	0.00011	0.0166					67	3972.5	99.99	0.83333	0.00011	0.83322
68	3379.21	85.05	0.02	0.00013	0.01987					68	3951.67	99.46	0.83333	0.00014	0.83319
69	3656.41	92.03	0.01687	0.00012	0.01675					69	3970.41	99.93	0.83333	0.00011	0.83322
70	3528.31	88.81	0.01865	0.00011	0.01854					70	3968.36	99.88	0.83333	0.00011	0.83322
71	3713.43	93.47	0.01841	0.00012	0.01829					71	3956.84	99.59	0.83333	0.0001	0.83323
72	3662.15	92.18	0.01609	0.00011	0.01598					72	3968.47	99.89	0.83333	0.00011	0.83322
73	3613.76	90.96	0.01757	0.00011	0.01746					73	3932.92	98.99	0.83333	0.00011	0.83322
74	3452.66	86.9	0.01899	0.00012	0.01887					74	3968.8	99.89	0.83333	0.00012	0.83321
75	3530.4	88.86	0.0193	0.00015	0.01915					75	3967.18	99.85	0.83333	0.00012	0.83321
76	3616.84	91.04	0.01676	0.00013	0.01663					76	3963.71	99.77	0.83333	0.00013	0.8332
77	3358.78	84.54	0.01865	0.00015	0.0185					77	3972.03	99.98	0.83333	0.00013	0.8332
78	3772.95	94.96	0.01809	0.0001	0.01799					78	3973.01	100	0.83333	0.0001	0.83323
79	3632.3	91.42	0.01771	0.00015	0.01756					79	3966.86	99.85	0.83333	0.0001	0.83323
80	3476.38	87.5	0.01749	0.00012	0.01737					80	3963.3	99.76	0.83333	0.00013	0.8332
81	3726.69	93.8	0.01723	0.00011	0.01712					81	3972.35	99.98	0.83333	0.00011	0.83322
82	3972.35	99.98	0.79603	0.00013	0.7959					82	3949.73	99.41	0.83333	0.00012	0.83321
83	3947.38	99.35	0.01471	0.00011	0.0146					83	3968.8	99.89	0.83333	0.00014	0.83319
84	3542.71	89.17	0.02236	0.00015	0.02221					84	3970.09	99.93	0.83333	0.00011	0.83322
85	3507.72	88.29	0.01848	0.00015	0.01833					85	3903.84	98.26	0.83333	0.00012	0.83321
86	3772.43	94.95	0.01462	0.0001	0.01452					86	3972.35	99.98	0.83333	0.00013	0.8332
87	3584.86	90.23	0.01782	0.00014	0.01768					87	3970.41	99.93	0.83333	0.00012	0.83321
88	3752.24	94.44	0.01562	0.00013	0.01549					88	3968.88	99.9	0.83333	0.0001	0.83323
89	3639.39	91.6	0.01897	0.00014	0.01883					89	3967.82	99.87	0.83333	0.0001	0.83323
90	3847.05	96.83	0.01806	0.0001	0.01796					90	3961.68	99.71	0.83333	0.00012	0.83321
91	3660.46	92.13	0.01772	0.00012	0.0176					91	3973.01	100	0.83333	0.00012	0.83321
92	3604.51	90.73	0.01689	0.00014	0.01675					92	3968.36	99.88	0.83333	0.00011	0.83322
93	3748.61	94.35	0.01597	0.00012	0.01585					93	3973	100	0.83333	0.00014	0.83319
94	3646.31	91.78	0.01805	0.00014	0.01791					94	3963.71	99.77	0.83333	0.00011	0.83322
95	3527.37	88.78	0.01738	0.00014	0.01724					95	3972.35	99.98	0.83333	0.00012	0.83321
96	3604.08	90.71	0.01966	0.00013	0.01953					96	3970.73	99.94	0.83333	0.00012	0.83321
97	3786.62	95.31	0.01668	0.00011	0.01657					97	3965.89	99.82	0.83333	0.00011	0.83322
98	3589.52	90.35	0.01597	0.0001	0.01587					98	3953.93	99.52	0.83333	0.00015	0.83318
99	3627.05	91.29	0.0149	0.00013	0.01477					99	3970.09	99.93	0.83333	0.00014	0.83319
100	3545.17	89.23	0.01896	0.00014	0.01882					100	3968.88	99.9	0.83333	0.00012	0.83321
101	3684.06	92.73	0.01732	0.0001	0.01722					101	3928.4	98.88	0.83333	0.00012	0.83321
102	3703.43	93.21	0.01587	0.00012	0.01575					102	3972.67	99.99	0.83333	0.00012	0.83321
103	3595.54	90.5	0.01937	0.0001	0.01927					103	3972.35	99.98	0.83333	0.00014	0.83319
104	3769.12	94.87	0.01901	0.00011	0.0189					104	3968.88	99.9	0.83333	0.00011	0.83322
105	3572.86	89.93	0.01728	0.00016	0.01712					105	3968.8	99.89	0.83333	0.00012	0.83321
106	3793.66	95.49	0.01422	0.00012	0.0141					106	3972.67	99.99	0.83333	0.00014	0.83319
107	3492.63	87.91	0.01716	0.00011	0.01705					107	3972.35	99.98	0.83333	0.00012	0.83321
108	3502.79	88.16	0.02087	0.00013	0.02074					108	3966.53	99.84	0.83333	0.0001	0.83323
109	3725.89	93.78	0.01478	0.00011	0.01467					109	3973.01	100	0.83333	0.00014	0.83319
110	3517.54	88.54	0.01829	0.00014	0.01815					110	3972.5	99.99	0.83333	0.0001	0.83323
111	3521.5	88.64	0.01671	0.00014	0.01657					111	3947.14	99.35	0.83333	0.00011	0.83322
112	3823.28	96.23	0.01713	0.00013	0.017					112	3836.62	96.57	0.83333	0.00011	0.83322
113	3793.41	95.48	0.01656	0.00012	0.01644					113	3972.67	99.99	0.83333	0.0001	0.83323
114	3373.43	84.91	0.01909	0.00014	0.01895					114	3972.35	99.98	0.83333	0.00013	0.8332
115	3609.07	90.84	0.01766	0.00013	0.01753					115	3970.43	99.94	0.83333	0.0001	0.83323
116	3602.88	90.68	0.0206	0.00014	0.02046					116	3857.95	97.1	0.83333	0.00011	0.83322
117	3461.97	87.14	0.02199	0.00015	0.02184					117	3955.87	99.57	0.83333	0.00012	0.83321
118	3586.38	90.27	0.0158	0.00013	0.01567					118	3973.01	100	0.83333	0.00014	0.83319
119	3547.64	89.29	0.01789	0.00012	0.01777					119	3972.67	99.99	0.83333	0.0001	0.83323
120	3700.01	93.13	0.01636	0.00013	0.01623					120	3971.98	99.97	0.83333	0.00012	0.83321
121	3680.14	92.63	0.01772	0.00012	0.0176					121	3972.67	99.99	0.83333	0.00012	0.83321
122	3686.58	92.79	0.01714	0.00012	0.01702					122	3969.12	99.9	0.83333	0.00012	0.83321
123	3706.76	93.3	0.01536	0.00013	0.01523					123	3972.67	99.99	0.83333	0.0001	0.83323
124	3522.2	88.65	0.0197	0.00017	0.01953					124	3969.91	99.92	0.83333	0.00012	0.83321
125	3505.29	88.23	0.01753	0.00016	0.01737					125	3972.67	99.99	0.83333	0.00011	0.83322
126	3635.12	91.5	0.01611	0.00013	0.01598					126	3972.67	99.99	0.83333	0.00013	0.8332
127	3893.15	97.99	0.01586	0.00011	0.01575					127	3973	100	0.83333	0.00012	0.83321
128	3801.64	95.69	0.0157	0.00013	0.01557					128	3951.99	99.47	0.83333	0.00012	0.83321
129	3538.47	89.06	0.01847	0.00015	0.01832					129	3971.98	99.97	0.83333	9e-05	0.83324
130	3436.15	86.49	0.01855	0.00014	0.01841					130	3972.5	99.99	0.83333	0.00014	0.83319
131	3510.3	88.35	0.02115	0.00013	0.02102					131	3972.67	99.99	0.83333	0.0001	0.83323
132	3921.83	98.71	0.01484	0.00011	0.01473					132	3973	100	0.83333	0.00013	0.8332
133	3698.68	93.1	0.02042	0.00013	0.02029					133	3972.35	99.98	0.83333	0.00012	0.83321
134	3757.35	94.57	0.01785	0.00011	0.01774					134	3970.73	99.94	0.83333	0.00012	0.83321
135	3686.16	92.78	0.01578	0.00013	0.01565					135	3971.46	99.96	0.83333	0.00015	0.83318
136	3758.18	94.59	0.01451	0.00012	0.01439					136	3964.59	99.79	0.83333	0.00011	0.83322
137	3744.84	94.26	0.01759	0.0001	0.01749					137	3971.06	99.95	0.83333	0.00012	0.83321
138	3641.92	91.67	0.01712	0.00015	0.01697					138	3972.67	99.99	0.83333	0.00011	0.83322
139	3570.35	89.87	0.01901	0.00016	0.01885					139	3972.67	99.99	0.83333	0.0001	0.83323
140	3676.89	92.55	0.01709	0.0001	0.01699					140	3921.94	98.71	0.83333	0.00012	0.83321
141	3586.43	90.27	0.01928	0.00011	0.01917					141	3970.95	99.95	0.83333	0.00013	0.8332
142	3500.76	88.11	0.01915	0.00014	0.01901					142	3967.18	99.85	0.83333	0.00014	0.83319
143	3419.33	86.06	0.02126	0.00014	0.02112					143	3971.98	99.97	0.83333	0.00012	0.83321
144	3466.06	87.24	0.01922	0.00012	0.0191					144	3964.22	99.78	0.83333	0.00012	0.83321
145	3584.03	90.21	0.01905	0.00011	0.01894					145	3954.92	99.54	0.83333	0.00013	0.8332
146	3514.15	88.45	0.01763	0.00013	0.0175					146	3949.75	99.41	0.83333	0.0001	0.83323
147	3590.25	90.37	0.01672	0.00013	0.01659					147	3972.35	99.98	0.83333	0.00013	0.8332
148	3636.38	91.53	0.01659	0.00011	0.01648					148	3970.09	99.93	0.83333	0.0001	0.83323
149	3577.35	90.04	0.01756	0.00014	0.01742					149	3970.41	99.93	0.83333	0.00011	0.83322
150	3426.85	86.25	0.01837	0.00011	0.01826					150	3972.35	99.98	0.83333	0.00011	0.83322
151	3830.75	96.42	0.01614	0.00011	0.01603					151	3897.05	98.09	0.83333	0.00011	0.83322
152	3510.36	88.36	0.02641	0.00013	0.02628					152	3971.06	99.95	0.83333	0.00012	0.83321
153	3616.2	91.02	0.01977	0.00012	0.01965					153	3960.72	99.69	0.83333	0.00012	0.83321
154	3829.8	96.4	0.01746	0.00012	0.01734					154	3967.84	99.87	0.83333	0.00012	0.83321
155	3693.69	92.97	0.01809	0.00013	0.01796					155	3971.98	99.97	0.83333	0.00011	0.83322
156	3529.16	88.83	0.01834	0.00015	0.01819					156	3967.33	99.86	0.83333	0.00011	0.83322
157	3714.04	93.48	0.01877	0.00013	0.01864					157	3972.03	99.98	0.83333	0.00012	0.83321
158	3439.99	86.58	0.02029	0.00016	0.02013					158	3951.3	99.45	0.83333	0.00011	0.83322
159	3472.13	87.39	0.02022	0.00012	0.0201					159	3972.67	99.99	0.83333	0.00016	0.83317
160	3603.11	90.69	0.01689	0.00011	0.01678					160	3968.36	99.88	0.83333	0.00011	0.83322
161	3479.2	87.57	0.01821	0.00012	0.01809					161	3966.86	99.85	0.83333	0.00012	0.83321
162	3714.8	93.5	0.01835	0.00011	0.01824					162	3970.41	99.93	0.83333	0.0001	0.83323
163	3864.79	97.28	0.01759	0.0001	0.01749					163	3972.67	99.99	0.83333	0.00012	0.83321
164	3809.5	95.88	0.01592	0.00011	0.01581					164	3973.01	100	0.83333	0.00014	0.83319
165	3529.85	88.85	0.01818	0.00012	0.01806					165	3972.03	99.98	0.83333	0.00012	0.83321
166	3559.07	89.58	0.01916	0.00014	0.01902					166	3973	100	0.83333	0.00012	0.83321
167	3679.45	92.61	0.01936	0.00012	0.01924					167	3951.99	99.47	0.83333	9e-05	0.83324
168	3408.05	85.78	0.02049	0.00017	0.02032					168	3973.01	100	0.83333	0.0001	0.83323
169	3728.93	93.86	0.01677	0.00011	0.01666					169	3972.67	99.99	0.83333	0.00013	0.8332
170	3790.5	95.41	0.01876	0.00011	0.01865					170	3970.73	99.94	0.83333	0.00012	0.83321
171	3519.61	88.59	0.01913	0.00012	0.01901					171	3973	100	0.83333	0.00014	0.83319
172	3841.68	96.69	0.01437	0.00011	0.01426					172	3970.95	99.95	0.83333	0.0001	0.83323
173	3654.65	91.99	0.016	0.00012	0.01588					173	3971.06	99.95	0.83333	0.00012	0.83321
174	3646.13	91.77	0.0178	0.00014	0.01766					174	3965.24	99.8	0.83333	0.00013	0.8332
175	3572.86	89.93	0.01753	0.00014	0.01739					175	3972.35	99.98	0.83333	0.00012	0.83321
176	3548.41	89.31	0.01766	0.00014	0.01752					176	3971.98	99.97	0.83333	0.0001	0.83323
177	3627.24	91.3	0.01716	0.00012	0.01704					177	3971.98	99.97	0.83333	0.0001	0.83323
178	3820.26	96.16	0.01649	0.0001	0.01639					178	3972.67	99.99	0.83333	0.00013	0.8332
179	3632.29	91.42	0.0166	0.00011	0.01649					179	3971.46	99.96	0.83333	0.00011	0.83322
180	3401.56	85.62	0.01612	0.00011	0.01601					180	3951.99	99.47	0.83333	0.00013	0.8332
181	3682.88	92.7	0.0181	0.00014	0.01796					181	3930.34	98.93	0.83333	0.0001	0.83323
182	3489.96	87.84	0.02076	0.00011	0.02065					182	3972.35	99.98	0.83333	0.00011	0.83322
183	3451.72	86.88	0.01667	0.0001	0.01657					183	3952.96	99.5	0.83333	0.00013	0.8332
184	3603.88	90.71	0.01618	0.00013	0.01605					184	3972.35	99.98	0.83333	0.00015	0.83318
185	3637.03	91.54	0.0165	0.00011	0.01639					185	3968.47	99.89	0.83333	0.0001	0.83323
186	3796.53	95.56	0.01739	0.00013	0.01726					186	3970.41	99.93	0.83333	0.00013	0.8332
187	3557.06	89.53	0.01806	0.00013	0.01793					187	3972.67	99.99	0.83333	0.00014	0.83319
188	3579.7	90.1	0.01833	0.00015	0.01818					188	3964.92	99.8	0.83333	0.00011	0.83322
189	3623.98	91.21	0.01613	0.00013	0.016					189	3955.22	99.55	0.83333	0.0001	0.83323
190	3436.04	86.48	0.01878	0.00014	0.01864					190	3967.18	99.85	0.83333	0.00012	0.83321
191	3913.81	98.51	0.01557	0.00012	0.01545					191	3972.35	99.98	0.83333	0.0001	0.83323
192	3583.33	90.19	0.01879	0.0001	0.01869					192	3966.86	99.85	0.83333	0.00011	0.83322
193	3555.63	89.49	0.02104	0.00013	0.02091					193	3972.03	99.98	0.83333	0.00012	0.83321
194	3527.05	88.78	0.01915	0.00011	0.01904					194	3972.5	99.99	0.83333	0.00012	0.83321
195	3712.73	93.45	0.01451	0.00011	0.0144					195	3972.67	99.99	0.83333	0.00011	0.83322
196	3509.89	88.34	0.01519	0.00012	0.01507					196	3972.5	99.99	0.83333	0.00012	0.83321
197	3478.34	87.55	0.01989	0.00014	0.01975					197	3949.75	99.41	0.83333	0.00013	0.8332
198	3585.01	90.23	0.01913	0.00015	0.01898					198	3966.86	99.85	0.83333	0.00011	0.83322
199	3560.22	89.61	0.01722	0.00011	0.01711					199	3926.46	98.83	0.83333	0.00012	0.83321
200	3651.63	91.91	0.0215	9e-05	0.02141					200	3967.18	99.85	0.83333	0.00013	0.8332

## Sheet: 05_BWACO_Seeds(111)
Fast Converegnce Exp							Fast Converegnce Exp			Slow Converegnce Exp							Slow Converegnce Exp
#	CBLF	Quality	Taumax	Taumin	DeltaTauminmax		Global Optimal Solution =	3972.67		#	CBLF	Quality	Taumax	Taumin	DeltaTauminmax		Global Optimal Solution =	3973.01
1	3697.46	93.06	0.01515	0.00012	0.01503		Minimum Optimal Solution=	3311.28		1	3972.35	99.98	0.83333	0.00012	0.83321		Minimum Optimal Solution =	3774.9
2	3675.97	92.52	0.01746	0.00011	0.01735		Mean of Optimal Solution =	3648.92		2	3972.67	99.99	0.83333	0.00011	0.83322		Mean of Optimal Solution =	3963.29
3	3577.51	90.05	0.01846	0.00013	0.01833		Median of Optimal Solution =	3648.92		3	3973	100	0.83333	0.00013	0.8332		Median of Optimal Solution =	3963.29
4	3601.6	90.65	0.01794	0.00015	0.01779		Solution Standrad Deviation=	138.069		4	3970.09	99.93	0.83333	0.00011	0.83322		Solution Standrad Deviation =	23.8699
5	3721.31	93.66	0.02099	0.0001	0.02089		Average Price =	12.825		5	3970.73	99.94	0.83333	0.00011	0.83322		Average Price =	111.585
6	3518.33	88.56	0.02072	0.00015	0.02057		Relability =	1		6	3969.12	99.9	0.83333	0.0001	0.83323		Relability =	66.5
7	3575.73	90	0.01888	0.00012	0.01876		Normalized Price =	1282.5		7	3972.67	99.99	0.83333	0.00011	0.83322		Normalized Price =	167.797
8	3638.86	91.59	0.01882	0.0001	0.01872		Average Solution Quality =	91.8428		8	3951.99	99.47	0.83333	0.00013	0.8332		Average Solution Quality =	99.7554
9	3718.65	93.6	0.01616	0.0001	0.01606		Average FDC =	-98.5473		9	3959.42	99.66	0.83333	0.00012	0.83321		Average FDC =	-520.581
10	3461.26	87.12	0.01702	0.00013	0.01689		Correlation Coefficent =	-1		10	3965.24	99.8	0.83333	0.00011	0.83322		Correlation Coefficent =	-0.92434
11	3515.31	88.48	0.0144	0.00011	0.01429		Solution Robustness =	26.4283		11	3971.46	99.96	0.83333	0.00014	0.83319		Solution Robustness =	166.037
12	3471.24	87.37	0.01786	0.00015	0.01771		Performance Rate =	0.00077973		12	3921.83	98.71	0.83333	0.00011	0.83322		Performance Rate =	0.0059596
13	3971.46	99.96	0.63211	0.00012	0.63199		Average Elapsed Time =	0.71453		13	3972.67	99.99	0.83333	0.00013	0.8332		Average Elapsed Time =	5.9207
14	3514.8	88.47	0.01738	0.00013	0.01725					14	3972.35	99.98	0.83333	0.00014	0.83319
15	3503.67	88.19	0.01834	0.00015	0.01819					15	3971.46	99.96	0.83333	0.00011	0.83322
16	3875.38	97.54	0.01553	0.00011	0.01542					16	3965.78	99.82	0.83333	0.00012	0.83321
17	3409.96	85.83	0.01938	0.00012	0.01926					17	3973	100	0.83333	0.00013	0.8332
18	3815.85	96.04	0.01602	0.00012	0.0159					18	3973	100	0.83333	0.00011	0.83322
19	3604.96	90.74	0.01748	0.00015	0.01733					19	3959.42	99.66	0.83333	0.0001	0.83323
20	3629.22	91.35	0.01647	0.00014	0.01633					20	3964.92	99.8	0.83333	0.00012	0.83321
21	3677.95	92.57	0.01778	0.00013	0.01765					21	3900.61	98.18	0.83333	0.0001	0.83323
22	3773.29	94.97	0.01757	0.00012	0.01745					22	3973.01	100	0.83333	0.00011	0.83322
23	3659.04	92.1	0.01808	0.00014	0.01794					23	3877.66	97.6	0.83333	0.0001	0.83323
24	3494.8	87.96	0.01818	0.00014	0.01804					24	3970.73	99.94	0.83333	0.00015	0.83318
25	3482.59	87.66	0.0229	0.00017	0.02273					25	3972.67	99.99	0.83333	0.00013	0.8332
26	3543.11	89.18	0.02057	0.00012	0.02045					26	3969.12	99.9	0.83333	0.00011	0.83322
27	3771.39	94.93	0.01764	0.0001	0.01754					27	3953.61	99.51	0.83333	0.00012	0.83321
28	3725.87	93.78	0.01732	0.00013	0.01719					28	3970.41	99.93	0.83333	0.0001	0.83323
29	3578.86	90.08	0.01676	0.00011	0.01665					29	3972.67	99.99	0.83333	0.00013	0.8332
30	3802.76	95.71	0.01734	0.00012	0.01722					30	3968.88	99.9	0.83333	0.00012	0.83321
31	3623.77	91.21	0.01729	0.00012	0.01717					31	3959.42	99.66	0.83333	0.00012	0.83321
32	3791.03	95.42	0.01635	0.00012	0.01623					32	3972.03	99.98	0.83333	0.00012	0.83321
33	3717.47	93.57	0.01714	0.00013	0.01701					33	3972.67	99.99	0.83333	0.00013	0.8332
34	3732.98	93.96	0.01637	0.00012	0.01625					34	3969.39	99.91	0.83333	0.00011	0.83322
35	3702.36	93.19	0.01866	0.00013	0.01853					35	3963.71	99.77	0.83333	0.00011	0.83322
36	3733.55	93.97	0.01718	0.00011	0.01707					36	3968.47	99.89	0.83333	0.00013	0.8332
37	3632.38	91.43	0.01563	0.0001	0.01553					37	3972.67	99.99	0.83333	0.00014	0.83319
38	3871.86	97.45	0.01548	0.00011	0.01537					38	3891.24	97.94	0.83333	0.0001	0.83323
39	3857.39	97.09	0.01968	0.00012	0.01956					39	3913.56	98.5	0.83333	9e-05	0.83324
40	3613.59	90.95	0.01705	0.00011	0.01694					40	3972.5	99.99	0.83333	0.00011	0.83322
41	3533.08	88.93	0.01857	0.00014	0.01843					41	3971.98	99.97	0.83333	0.00011	0.83322
42	3659.81	92.12	0.01884	0.0001	0.01874					42	3972.67	99.99	0.83333	0.00013	0.8332
43	3815.62	96.04	0.01974	0.00013	0.01961					43	3969.76	99.92	0.83333	0.00012	0.83321
44	3764.06	94.74	0.01575	0.00013	0.01562					44	3971.98	99.97	0.83333	0.0001	0.83323
45	3945.2	99.3	0.01582	9e-05	0.01573					45	3972.67	99.99	0.83333	0.00015	0.83318
46	3686.86	92.8	0.01604	0.00013	0.01591					46	3970.73	99.94	0.83333	0.00012	0.83321
47	3607.13	90.79	0.01634	0.00014	0.0162					47	3972.67	99.99	0.83333	0.00011	0.83322
48	3691.06	92.9	0.0204	0.00013	0.02027					48	3973.01	100	0.83333	0.0001	0.83323
49	3647.64	91.81	0.01564	0.00012	0.01552					49	3972.03	99.98	0.83333	0.0001	0.83323
50	3846.26	96.81	0.01705	0.00011	0.01694					50	3970.09	99.93	0.83333	0.00013	0.8332
51	3589.49	90.35	0.01848	0.00013	0.01835					51	3968.47	99.89	0.83333	0.0001	0.83323
52	3396.81	85.5	0.01941	0.00013	0.01928					52	3972.67	99.99	0.83333	0.00012	0.83321
53	3749.72	94.38	0.01651	0.0001	0.01641					53	3965.24	99.8	0.83333	0.00013	0.8332
54	3885.42	97.8	0.01476	0.00012	0.01464					54	3969.39	99.91	0.83333	0.00012	0.83321
55	3472.36	87.4	0.02131	0.00013	0.02118					55	3945.85	99.32	0.83333	0.00011	0.83322
56	3837.05	96.58	0.01952	0.00011	0.01941					56	3971.06	99.95	0.83333	0.0001	0.83323
57	3793.58	95.48	0.01543	0.00011	0.01532					57	3774.9	95.01	0.83333	0.00012	0.83321
58	3547.32	89.29	0.01826	0.0001	0.01816					58	3973	100	0.83333	0.00011	0.83322
59	3459.79	87.08	0.02149	0.00013	0.02136					59	3971.46	99.96	0.83333	0.00015	0.83318
60	3507.72	88.29	0.01719	0.00016	0.01703					60	3965.26	99.8	0.83333	0.00012	0.83321
61	3605.18	90.74	0.0201	0.00011	0.01999					61	3972.67	99.99	0.83333	0.00014	0.83319
62	3647.06	91.8	0.01761	0.00011	0.0175					62	3971.46	99.96	0.83333	0.00013	0.8332
63	3738.82	94.11	0.01738	0.00012	0.01726					63	3959.05	99.65	0.83333	0.0001	0.83323
64	3638.07	91.57	0.01876	0.00012	0.01864					64	3972.5	99.99	0.83333	0.00012	0.83321
65	3581.65	90.15	0.01999	0.00014	0.01985					65	3972.35	99.98	0.83333	0.00012	0.83321
66	3540.1	89.1	0.0171	0.00011	0.01699					66	3970.41	99.93	0.83333	0.00014	0.83319
67	3703.69	93.22	0.01691	0.00014	0.01677					67	3972.5	99.99	0.83333	0.00013	0.8332
68	3754.62	94.5	0.01651	0.00011	0.0164					68	3967.84	99.87	0.83333	0.00013	0.8332
69	3743.44	94.22	0.01688	0.0001	0.01678					69	3963.62	99.76	0.83333	0.00013	0.8332
70	3451.3	86.87	0.01689	0.00011	0.01678					70	3972.67	99.99	0.83333	0.00011	0.83322
71	3723.03	93.71	0.01709	0.00012	0.01697					71	3958.45	99.63	0.83333	0.00011	0.83322
72	3791.16	95.42	0.01618	0.0001	0.01608					72	3968.8	99.89	0.83333	0.0001	0.83323
73	3666.47	92.28	0.01768	0.00012	0.01756					73	3972.67	99.99	0.83333	0.00012	0.83321
74	3491.52	87.88	0.01826	0.00014	0.01812					74	3972.67	99.99	0.83333	0.00012	0.83321
75	3563.76	89.7	0.0174	0.0001	0.0173					75	3955.87	99.57	0.83333	0.00013	0.8332
76	3787.7	95.34	0.01874	0.00012	0.01862					76	3971.98	99.97	0.83333	0.00012	0.83321
77	3740.37	94.14	0.01587	0.00013	0.01574					77	3946.17	99.32	0.83333	0.00012	0.83321
78	3722.54	93.7	0.01549	0.00012	0.01537					78	3970.41	99.93	0.83333	0.00011	0.83322
79	3463.86	87.18	0.02064	0.00013	0.02051					79	3888	97.86	0.83333	0.00013	0.8332
80	3713.65	93.47	0.01899	0.00013	0.01886					80	3960.09	99.67	0.83333	0.00012	0.83321
81	3547.68	89.29	0.01581	0.0001	0.01571					81	3970.09	99.93	0.83333	0.00015	0.83318
82	3501.09	88.12	0.01882	0.00012	0.0187					82	3970.09	99.93	0.83333	0.00012	0.83321
83	3669.82	92.37	0.01658	0.00013	0.01645					83	3970.41	99.93	0.83333	0.00013	0.8332
84	3643.17	91.7	0.01824	0.00013	0.01811					84	3947.14	99.35	0.83333	0.00011	0.83322
85	3799.2	95.63	0.01601	0.00011	0.0159					85	3973	100	0.83333	0.0001	0.83323
86	3651.26	91.9	0.01958	0.00013	0.01945					86	3972.03	99.98	0.83333	0.00013	0.8332
87	3583.02	90.18	0.01651	0.00014	0.01637					87	3968.88	99.9	0.83333	0.00012	0.83321
88	3559.51	89.59	0.01729	0.00013	0.01716					88	3970.09	99.93	0.83333	0.00011	0.83322
89	3622.94	91.19	0.01756	0.00011	0.01745					89	3826.93	96.32	0.83333	0.00012	0.83321
90	3798.05	95.6	0.01476	0.00011	0.01465					90	3972.35	99.98	0.83333	0.0001	0.83323
91	3671.02	92.4	0.01903	0.00011	0.01892					91	3972.67	99.99	0.83333	0.00012	0.83321
92	3614.63	90.98	0.0179	0.00012	0.01778					92	3971.98	99.97	0.83333	0.00012	0.83321
93	3659.72	92.11	0.01487	0.00014	0.01473					93	3970.09	99.93	0.83333	0.00011	0.83322
94	3477.59	87.53	0.01596	0.00013	0.01583					94	3972.67	99.99	0.83333	0.00012	0.83321
95	3834.46	96.51	0.01673	0.00013	0.0166					95	3972.35	99.98	0.83333	0.00013	0.8332
96	3972.67	99.99	0.76599	0.00015	0.76584					96	3971.98	99.97	0.83333	0.00012	0.83321
97	3590.25	90.37	0.01531	0.00011	0.0152					97	3972.35	99.98	0.83333	0.0001	0.83323
98	3653.18	91.95	0.01978	0.00011	0.01967					98	3973.01	100	0.83333	0.00013	0.8332
99	3874.27	97.51	0.0157	0.00011	0.01559					99	3972.67	99.99	0.83333	0.0001	0.83323
100	3497.9	88.04	0.0173	0.00014	0.01716					100	3963.19	99.75	0.83333	0.00012	0.83321
101	3754.4	94.5	0.01626	0.00011	0.01615					101	3972.03	99.98	0.83333	0.00013	0.8332
102	3835.15	96.53	0.01643	0.00011	0.01632					102	3972.5	99.99	0.83333	0.00012	0.83321
103	3408.66	85.8	0.0184	0.00013	0.01827					103	3972.67	99.99	0.83333	0.0001	0.83323
104	3375.8	84.97	0.01901	0.00013	0.01888					104	3972.67	99.99	0.83333	0.0001	0.83323
105	3721.76	93.68	0.0187	0.00015	0.01855					105	3972.67	99.99	0.83333	0.00011	0.83322
106	3585.15	90.24	0.01762	0.00015	0.01747					106	3972.67	99.99	0.83333	0.00012	0.83321
107	3511.2	88.38	0.01814	0.00011	0.01803					107	3970.73	99.94	0.83333	0.00013	0.8332
108	3412.33	85.89	0.02099	0.00012	0.02087					108	3963.19	99.75	0.83333	0.00014	0.83319
109	3724.86	93.75	0.0169	0.00011	0.01679					109	3970.09	99.93	0.83333	0.00011	0.83322
110	3726.51	93.8	0.01878	0.0001	0.01868					110	3973.01	100	0.83333	0.00011	0.83322
111	3388.96	85.3	0.01927	0.00013	0.01914					111	3970.41	99.93	0.83333	9e-05	0.83324
112	3676.02	92.52	0.01791	0.00012	0.01779					112	3967.5	99.86	0.83333	0.00011	0.83322
113	3591.69	90.4	0.02329	0.00011	0.02318					113	3972.67	99.99	0.83333	0.00011	0.83322
114	3721.08	93.66	0.01852	0.00015	0.01837					114	3967.18	99.85	0.83333	0.0001	0.83323
115	3480.47	87.6	0.01889	0.00015	0.01874					115	3918.38	98.63	0.83333	0.00012	0.83321
116	3831.88	96.45	0.01631	0.00013	0.01618					116	3897.05	98.09	0.83333	0.00011	0.83322
117	3470.06	87.34	0.01855	0.00012	0.01843					117	3968.36	99.88	0.83333	0.00011	0.83322
118	3868.58	97.37	0.01664	0.00011	0.01653					118	3971.98	99.97	0.83333	0.00012	0.83321
119	3644.2	91.72	0.01852	0.00013	0.01839					119	3970.73	99.94	0.83333	0.00013	0.8332
120	3497.07	88.02	0.02011	0.00012	0.01999					120	3926.46	98.83	0.83333	0.00014	0.83319
121	3642.04	91.67	0.01673	0.00014	0.01659					121	3971.7	99.97	0.83333	0.00012	0.83321
122	3532.84	88.92	0.01926	0.00013	0.01913					122	3970.73	99.94	0.83333	0.00011	0.83322
123	3835.65	96.54	0.01841	0.00011	0.0183					123	3972.03	99.98	0.83333	0.00013	0.8332
124	3643.78	91.71	0.0174	0.00011	0.01729					124	3970.73	99.94	0.83333	0.00011	0.83322
125	3364.82	84.69	0.0201	0.00016	0.01994					125	3972.35	99.98	0.83333	0.00013	0.8332
126	3827.66	96.34	0.01513	0.00011	0.01502					126	3971.98	99.97	0.83333	0.00011	0.83322
127	3494.75	87.96	0.01875	0.00015	0.0186					127	3958.78	99.64	0.83333	0.00011	0.83322
128	3906.32	98.32	0.0173	0.00011	0.01719					128	3913.21	98.49	0.83333	0.0001	0.83323
129	3689.82	92.87	0.01855	0.00011	0.01844					129	3970.41	99.93	0.83333	0.00011	0.83322
130	3545.12	89.23	0.01835	0.00012	0.01823					130	3972.35	99.98	0.83333	0.00012	0.83321
131	3662.94	92.2	0.01577	0.00013	0.01564					131	3921.76	98.71	0.83333	0.00013	0.8332
132	3683.71	92.72	0.02031	0.00011	0.0202					132	3964.62	99.79	0.83333	0.00011	0.83322
133	3666.67	92.29	0.01623	0.00013	0.0161					133	3972.67	99.99	0.83333	0.00014	0.83319
134	3692.69	92.94	0.01547	0.00013	0.01534					134	3962.16	99.73	0.83333	0.00012	0.83321
135	3585.12	90.24	0.01878	0.00016	0.01862					135	3972.03	99.98	0.83333	0.00012	0.83321
136	3490.53	87.86	0.0183	0.00016	0.01814					136	3972.67	99.99	0.83333	0.00013	0.8332
137	3443.44	86.67	0.0187	0.00011	0.01859					137	3971.38	99.96	0.83333	0.00011	0.83322
138	3772.42	94.95	0.01656	0.00011	0.01645					138	3970.95	99.95	0.83333	0.00013	0.8332
139	3566.39	89.77	0.01673	0.00012	0.01661					139	3920.97	98.69	0.83333	0.00011	0.83322
140	3510.5	88.36	0.01667	0.00012	0.01655					140	3971.38	99.96	0.83333	0.00012	0.83321
141	3654.24	91.98	0.01631	0.00016	0.01615					141	3968.88	99.9	0.83333	0.00013	0.8332
142	3748.16	94.34	0.01409	0.00012	0.01397					142	3971.98	99.97	0.83333	0.00012	0.83321
143	3351.07	84.35	0.01692	0.00014	0.01678					143	3972.35	99.98	0.83333	0.00011	0.83322
144	3534.24	88.96	0.01901	0.0001	0.01891					144	3972.03	99.98	0.83333	0.00013	0.8332
145	3741.43	94.17	0.0149	0.00012	0.01478					145	3972.67	99.99	0.83333	0.00012	0.83321
146	3679.88	92.62	0.01686	0.00011	0.01675					146	3970.73	99.94	0.83333	0.00013	0.8332
147	3441.32	86.62	0.01811	0.00013	0.01798					147	3972.03	99.98	0.83333	0.00013	0.8332
148	3767.44	94.83	0.01565	0.00013	0.01552					148	3972.35	99.98	0.83333	0.00013	0.8332
149	3663.85	92.22	0.01871	0.00011	0.0186					149	3965.78	99.82	0.83333	0.00011	0.83322
150	3636.61	91.53	0.01595	0.0001	0.01585					150	3972.35	99.98	0.83333	0.00014	0.83319
151	3793.1	95.47	0.0169	0.00013	0.01677					151	3973.01	100	0.83333	0.00012	0.83321
152	3909.35	98.4	0.01473	9e-05	0.01464					152	3968.88	99.9	0.83333	0.00013	0.8332
153	3667.62	92.31	0.02091	0.00011	0.0208					153	3973	100	0.83333	0.00012	0.83321
154	3543.85	89.2	0.01864	0.00011	0.01853					154	3973	100	0.83333	0.00012	0.83321
155	3627.12	91.29	0.01652	0.00012	0.0164					155	3968.47	99.89	0.83333	0.00012	0.83321
156	3647.33	91.8	0.01838	0.00012	0.01826					156	3973.01	100	0.83333	0.00012	0.83321
157	3738.88	94.11	0.0201	0.00013	0.01997					157	3971.98	99.97	0.83333	0.00012	0.83321
158	3682.11	92.68	0.01663	0.00012	0.01651					158	3970.73	99.94	0.83333	0.00013	0.8332
159	3609.53	90.85	0.01605	0.0001	0.01595					159	3970.09	99.93	0.83333	0.00014	0.83319
160	3526.39	88.76	0.02003	0.00012	0.01991					160	3973	100	0.83333	0.00013	0.8332
161	3553.75	89.45	0.01794	0.00013	0.01781					161	3971.98	99.97	0.83333	0.00011	0.83322
162	3588.66	90.33	0.0152	0.00013	0.01507					162	3972.35	99.98	0.83333	0.0001	0.83323
163	3927	98.84	0.01631	0.00013	0.01618					163	3970.41	99.93	0.83333	9e-05	0.83324
164	3560.53	89.62	0.01939	0.00013	0.01926					164	3968.36	99.88	0.83333	0.00011	0.83322
165	3814.21	96	0.01722	0.00011	0.01711					165	3973	100	0.83333	0.0001	0.83323
166	3834.46	96.51	0.01826	0.0001	0.01816					166	3959.05	99.65	0.83333	0.00012	0.83321
167	3674.03	92.47	0.01754	0.0001	0.01744					167	3973	100	0.83333	0.00012	0.83321
168	3613.57	90.95	0.0175	0.0001	0.0174					168	3964.59	99.79	0.83333	0.00012	0.83321
169	3695.02	93	0.01929	0.00013	0.01916					169	3971.98	99.97	0.83333	0.00012	0.83321
170	3596.16	90.51	0.01611	0.00013	0.01598					170	3961.68	99.71	0.83333	0.00013	0.8332
171	3895.88	98.06	0.01618	0.0001	0.01608					171	3970.09	99.93	0.83333	0.00015	0.83318
172	3442.24	86.64	0.0193	0.00016	0.01914					172	3959.75	99.67	0.83333	0.0001	0.83323
173	3501.93	88.14	0.01898	0.0001	0.01888					173	3973	100	0.83333	0.00011	0.83322
174	3648.12	91.82	0.01899	0.00013	0.01886					174	3972.35	99.98	0.83333	0.00014	0.83319
175	3493.96	87.94	0.01806	0.00013	0.01793					175	3973.01	100	0.83333	0.00012	0.83321
176	3631.8	91.41	0.02008	0.00013	0.01995					176	3973	100	0.83333	0.00014	0.83319
177	3822.57	96.21	0.01523	0.0001	0.01513					177	3964.27	99.78	0.83333	0.00014	0.83319
178	3569.24	89.84	0.01732	0.00014	0.01718					178	3960.61	99.69	0.83333	0.00013	0.8332
179	3759.5	94.63	0.01547	0.00011	0.01536					179	3957.5	99.61	0.83333	0.0001	0.83323
180	3436.98	86.51	0.02041	0.00013	0.02028					180	3973	100	0.83333	0.00011	0.83322
181	3642.39	91.68	0.01894	0.00014	0.0188					181	3952.85	99.49	0.83333	0.0001	0.83323
182	3529.67	88.84	0.02222	0.00015	0.02207					182	3972.5	99.99	0.83333	0.0001	0.83323
183	3696.94	93.05	0.01599	0.00013	0.01586					183	3972.67	99.99	0.83333	0.00015	0.83318
184	3702.75	93.2	0.01743	0.0001	0.01733					184	3973	100	0.83333	0.00011	0.83322
185	3842.89	96.72	0.01586	0.00013	0.01573					185	3971.06	99.95	0.83333	0.00013	0.8332
186	3805.51	95.78	0.01664	0.00012	0.01652					186	3972.35	99.98	0.83333	0.00012	0.83321
187	3426.84	86.25	0.01858	0.00014	0.01844					187	3972.5	99.99	0.83333	0.00013	0.8332
188	3668.17	92.33	0.01757	0.00011	0.01746					188	3964.92	99.8	0.83333	0.0001	0.83323
189	3505.07	88.22	0.01944	0.00012	0.01932					189	3971.46	99.96	0.83333	0.00013	0.8332
190	3609.81	90.86	0.01804	0.00013	0.01791					190	3973	100	0.83333	0.00012	0.83321
191	3684.26	92.73	0.01557	0.00013	0.01544					191	3971.46	99.96	0.83333	0.00012	0.83321
192	3450.93	86.86	0.02098	0.00014	0.02084					192	3972.67	99.99	0.83333	9e-05	0.83324
193	3450.68	86.85	0.01968	0.00014	0.01954					193	3968.36	99.88	0.83333	0.0001	0.83323
194	3841.86	96.7	0.0145	0.00012	0.01438					194	3968.36	99.88	0.83333	9e-05	0.83324
195	3834.24	96.51	0.01568	0.00012	0.01556					195	3966.86	99.85	0.83333	0.0001	0.83323
196	3618.11	91.07	0.01728	0.00013	0.01715					196	3973.01	100	0.83333	0.00013	0.8332
197	3761.2	94.67	0.01736	0.00013	0.01723					197	3925.97	98.82	0.83333	0.0001	0.83323
198	3842.14	96.71	0.01634	0.0001	0.01624					198	3961.16	99.7	0.83333	0.00011	0.83322
199	3743.61	94.23	0.01606	0.0001	0.01596					199	3973	100	0.83333	0.00011	0.83322
200	3311.28	83.34	0.01644	0.00015	0.01629					200	3886.71	97.83	0.83333	0.00012	0.83321

## Sheet: 06_BWACO_Seeds(200)
Fast Converegnce Exp							Fast Converegnce Exp			Slow Converegnce Exp							Slow Converegnce Exp
#	CBLF	Quality	Taumax	Taumin	DeltaTauminmax		Global Optimal Solution =	3897.02		#	CBLF	Quality	Taumax	Taumin	DeltaTauminmax		Global Optimal Solution =	3973.01
1	3764.34	94.75	0.01613	0.00011	0.01602		Minimum Optimal Solution =	3290.54		1	3967.84	99.87	0.83333	0.00011	0.83322		Minimum Optimal Solution =	3649.83
2	3605.91	90.76	0.02017	0.00012	0.02005		Mean of Optimal Solution =	3636.64		2	3962.98	99.75	0.83333	0.0001	0.83323		Mean of Optimal Solution =	3957.32
3	3731.52	93.92	0.01665	0.00012	0.01653		Median of Optimal Solution =	3636.64		3	3971.98	99.97	0.83333	0.00013	0.8332		Median of Optimal Solution =	3957.32
4	3655.76	92.01	0.02004	0.0001	0.01994		Solution Standrad Deviation =	129.001		4	3972.35	99.98	0.83333	0.00012	0.83321		Solution Standrad Deviation =	44.8064
5	3777.59	95.08	0.01457	0.00011	0.01446		Average Price =	12.305		5	3964.59	99.79	0.83333	0.00013	0.8332		Average Price =	113.415
6	3864.62	97.27	0.01359	9e-05	0.0135		Relability =	0		6	3970.73	99.94	0.83333	0.00014	0.83319		Relability =	63.5
7	3557.61	89.54	0.01658	0.00014	0.01644		Normalized Price =	65535		7	3971.98	99.97	0.83333	0.00012	0.83321		Normalized Price =	178.606
8	3400.6	85.59	0.0201	0.00014	0.01996		Average Solution Quality =	91.5336		8	3973	100	0.83333	0.0001	0.83323		Average Solution Quality =	99.605
9	3498.34	88.05	0.01856	0.00013	0.01843		Average FDC =	-82.7176		9	3965.24	99.8	0.83333	0.00012	0.83321		Average FDC =	-509.598
10	3494.17	87.95	0.02038	0.00015	0.02023		Correlation Coefficent =	-1		10	3972.5	99.99	0.83333	0.00011	0.83322		Correlation Coefficent =	-0.91886
11	3469.25	87.32	0.02005	0.00014	0.01991		Solution Robustness =	28.1908		11	3972.67	99.99	0.83333	0.00012	0.83321		Solution Robustness =	88.3203
12	3553.48	89.44	0.01752	0.00011	0.01741		Performance Rate =	0.00040634		12	3968.36	99.88	0.83333	0.00011	0.83322		Performance Rate =	0.0055989
13	3290.54	82.82	0.01719	0.00015	0.01704		Average Elapsed Time =	0.6858		13	3966.86	99.85	0.83333	0.00012	0.83321		Average Elapsed Time =	5.9986
14	3576.74	90.03	0.01652	0.00013	0.01639					14	3862.47	97.22	0.83333	0.00014	0.83319
15	3693.01	92.95	0.018	0.00011	0.01789					15	3970.73	99.94	0.83333	0.00013	0.8332
16	3389.91	85.32	0.02012	0.00014	0.01998					16	3955.95	99.57	0.83333	0.00012	0.83321
17	3662.02	92.17	0.01539	0.00013	0.01526					17	3972.67	99.99	0.83333	0.00011	0.83322
18	3661.83	92.17	0.01456	0.00012	0.01444					18	3971.98	99.97	0.83333	0.0001	0.83323
19	3694.91	93	0.01665	0.00011	0.01654					19	3973	100	0.83333	0.00014	0.83319
20	3618.41	91.07	0.01773	0.0001	0.01763					20	3944.56	99.28	0.83333	9e-05	0.83324
21	3737.85	94.08	0.0178	9e-05	0.01771					21	3972.5	99.99	0.83333	0.00011	0.83322
22	3871.45	97.44	0.01448	0.00013	0.01435					22	3971.98	99.97	0.83333	0.0001	0.83323
23	3493.25	87.92	0.01681	0.0001	0.01671					23	3962.77	99.74	0.83333	0.00012	0.83321
24	3387.42	85.26	0.0171	0.00013	0.01697					24	3967.18	99.85	0.83333	0.00012	0.83321
25	3871.64	97.45	0.01506	9e-05	0.01497					25	3971.06	99.95	0.83333	0.00012	0.83321
26	3616.29	91.02	0.01669	0.00013	0.01656					26	3973	100	0.83333	0.00012	0.83321
27	3661.69	92.16	0.0178	0.00012	0.01768					27	3973.01	100	0.83333	0.00013	0.8332
28	3498.23	88.05	0.01976	0.00011	0.01965					28	3888.65	97.88	0.83333	0.00011	0.83322
29	3429.36	86.32	0.0219	0.00013	0.02177					29	3972.35	99.98	0.83333	0.00011	0.83322
30	3522.32	88.66	0.01851	0.00014	0.01837					30	3955.55	99.56	0.83333	0.0001	0.83323
31	3783.83	95.24	0.01446	0.00011	0.01435					31	3972.03	99.98	0.83333	0.00012	0.83321
32	3519.4	88.58	0.01726	0.00011	0.01715					32	3972.67	99.99	0.83333	0.00011	0.83322
33	3407.34	85.76	0.01593	0.00014	0.01579					33	3953.7	99.51	0.83333	0.00011	0.83322
34	3627.02	91.29	0.01677	0.00014	0.01663					34	3969.44	99.91	0.83333	0.00012	0.83321
35	3819.51	96.14	0.01578	0.0001	0.01568					35	3971.46	99.96	0.83333	0.00013	0.8332
36	3603.87	90.71	0.01768	0.00013	0.01755					36	3970.95	99.95	0.83333	0.00011	0.83322
37	3674.43	92.48	0.01716	0.00013	0.01703					37	3972.03	99.98	0.83333	0.00017	0.83316
38	3485.55	87.73	0.01941	0.00014	0.01927					38	3972.5	99.99	0.83333	0.00011	0.83322
39	3681.43	92.66	0.01764	0.00013	0.01751					39	3971.98	99.97	0.83333	0.00012	0.83321
40	3588.02	90.31	0.01829	0.00014	0.01815					40	3969.39	99.91	0.83333	0.00012	0.83321
41	3714.21	93.49	0.01909	0.0001	0.01899					41	3725.13	93.76	0.83333	0.00011	0.83322
42	3466.18	87.24	0.01459	0.00012	0.01447					42	3972.5	99.99	0.83333	0.00011	0.83322
43	3633.44	91.45	0.01726	0.0001	0.01716					43	3966.56	99.84	0.83333	0.0001	0.83323
44	3892.02	97.96	0.01836	0.00012	0.01824					44	3972.67	99.99	0.83333	0.00013	0.8332
45	3676.33	92.53	0.01925	0.00013	0.01912					45	3863.77	97.25	0.83333	0.0001	0.83323
46	3714.8	93.5	0.01699	0.00012	0.01687					46	3972.5	99.99	0.83333	0.00014	0.83319
47	3386.18	85.23	0.02019	0.00018	0.02001					47	3919.03	98.64	0.83333	0.00012	0.83321
48	3613.17	90.94	0.01981	0.00014	0.01967					48	3973	100	0.83333	0.00011	0.83322
49	3841.14	96.68	0.01536	9e-05	0.01527					49	3972.67	99.99	0.83333	0.00012	0.83321
50	3841.24	96.68	0.01309	0.0001	0.01299					50	3965.24	99.8	0.83333	0.00012	0.83321
51	3739.26	94.12	0.01711	0.00014	0.01697					51	3873.46	97.49	0.83333	0.00014	0.83319
52	3743.1	94.21	0.01745	0.00012	0.01733					52	3965.24	99.8	0.83333	0.00013	0.8332
53	3656.15	92.02	0.01751	0.00013	0.01738					53	3971.46	99.96	0.83333	0.00011	0.83322
54	3834.46	96.51	0.0165	0.0001	0.0164					54	3863.77	97.25	0.83333	0.00011	0.83322
55	3419.4	86.07	0.01643	0.00013	0.0163					55	3971.98	99.97	0.83333	0.00012	0.83321
56	3450.74	86.85	0.01792	0.00014	0.01778					56	3972.5	99.99	0.83333	0.0001	0.83323
57	3657.91	92.07	0.01895	0.00011	0.01884					57	3972.35	99.98	0.83333	0.00015	0.83318
58	3572.36	89.92	0.01996	0.00011	0.01985					58	3973.01	100	0.83333	0.0001	0.83323
59	3724.74	93.75	0.01609	0.00013	0.01596					59	3969.39	99.91	0.83333	0.00013	0.8332
60	3617.98	91.06	0.01696	0.00014	0.01682					60	3972.5	99.99	0.83333	0.00012	0.83321
61	3562.07	89.66	0.01669	0.00014	0.01655					61	3972.67	99.99	0.83333	0.00013	0.8332
62	3636.45	91.53	0.01787	0.00012	0.01775					62	3971.98	99.97	0.83333	0.00014	0.83319
63	3464.55	87.2	0.0165	0.00012	0.01638					63	3972.5	99.99	0.83333	0.0001	0.83323
64	3624.18	91.22	0.01846	0.00011	0.01835					64	3972.35	99.98	0.83333	0.00012	0.83321
65	3856.17	97.06	0.01427	0.00012	0.01415					65	3685.38	92.76	0.83333	0.00013	0.8332
66	3871.17	97.44	0.01654	0.00012	0.01642					66	3968.36	99.88	0.83333	0.0001	0.83323
67	3740.39	94.14	0.01773	0.00011	0.01762					67	3962.66	99.74	0.83333	0.0001	0.83323
68	3596.3	90.52	0.01884	0.00011	0.01873					68	3955.55	99.56	0.83333	0.00011	0.83322
69	3505.66	88.24	0.01793	0.00013	0.0178					69	3969.39	99.91	0.83333	0.00012	0.83321
70	3558.28	89.56	0.01756	0.00013	0.01743					70	3972.67	99.99	0.83333	0.00012	0.83321
71	3688.37	92.84	0.0167	0.00012	0.01658					71	3971.98	99.97	0.83333	0.00012	0.83321
72	3538.89	89.07	0.01697	0.00014	0.01683					72	3971.46	99.96	0.83333	0.0001	0.83323
73	3545.46	89.24	0.02048	0.00015	0.02033					73	3970.09	99.93	0.83333	0.00012	0.83321
74	3604.2	90.72	0.01834	0.00015	0.01819					74	3972.67	99.99	0.83333	0.0001	0.83323
75	3567.92	89.8	0.01708	0.00012	0.01696					75	3965.24	99.8	0.83333	0.00011	0.83322
76	3362.66	84.64	0.01766	0.00014	0.01752					76	3961.36	99.71	0.83333	9e-05	0.83324
77	3714.59	93.5	0.01707	0.00013	0.01694					77	3936.16	99.07	0.83333	0.00012	0.83321
78	3449.18	86.82	0.02021	0.00014	0.02007					78	3831.45	96.44	0.83333	0.0001	0.83323
79	3777.4	95.08	0.01674	0.00013	0.01661					79	3972.35	99.98	0.83333	0.00012	0.83321
80	3607.41	90.8	0.01809	0.00013	0.01796					80	3971.98	99.97	0.83333	0.00012	0.83321
81	3786.53	95.31	0.01692	0.00012	0.0168					81	3972.67	99.99	0.83333	0.00011	0.83322
82	3541.2	89.13	0.01751	0.0001	0.01741					82	3972.67	99.99	0.83333	0.00011	0.83322
83	3666.83	92.29	0.01611	0.00014	0.01597					83	3929.05	98.89	0.83333	0.00013	0.8332
84	3503.91	88.19	0.01768	0.00013	0.01755					84	3959.42	99.66	0.83333	0.00011	0.83322
85	3660.23	92.13	0.0162	0.00013	0.01607					85	3966.53	99.84	0.83333	0.00014	0.83319
86	3671.9	92.42	0.01964	0.00011	0.01953					86	3971.98	99.97	0.83333	0.00011	0.83322
87	3767.53	94.83	0.01997	0.0001	0.01987					87	3968.88	99.9	0.83333	0.00013	0.8332
88	3532.48	88.91	0.01905	0.00014	0.01891					88	3971.06	99.95	0.83333	0.00012	0.83321
89	3399.86	85.57	0.02003	0.00015	0.01988					89	3731.59	93.92	0.83333	0.00011	0.83322
90	3578.97	90.08	0.0155	0.00013	0.01537					90	3968.88	99.9	0.83333	0.00012	0.83321
91	3767.12	94.82	0.01831	0.0001	0.01821					91	3972.67	99.99	0.83333	0.00012	0.83321
92	3842.78	96.72	0.01635	0.00012	0.01623					92	3972.03	99.98	0.83333	9e-05	0.83324
93	3452.98	86.91	0.02287	0.00015	0.02272					93	3972.67	99.99	0.83333	0.00012	0.83321
94	3672.11	92.43	0.01874	0.00014	0.0186					94	3973.01	100	0.83333	0.0001	0.83323
95	3648.79	91.84	0.01571	0.00012	0.01559					95	3971.46	99.96	0.83333	0.0001	0.83323
96	3520.26	88.6	0.02754	0.00013	0.02741					96	3959.57	99.66	0.83333	0.0001	0.83323
97	3736.85	94.06	0.01566	0.00012	0.01554					97	3973.01	100	0.83333	0.00011	0.83322
98	3669.02	92.35	0.01658	0.00011	0.01647					98	3973	100	0.83333	0.00011	0.83322
99	3563.04	89.68	0.01998	0.00014	0.01984					99	3971.06	99.95	0.83333	9e-05	0.83324
100	3671.09	92.4	0.01683	0.00011	0.01672					100	3967.84	99.87	0.83333	0.00011	0.83322
101	3849.69	96.9	0.01743	0.00011	0.01732					101	3971.98	99.97	0.83333	9e-05	0.83324
102	3486.39	87.75	0.01898	0.00012	0.01886					102	3967.5	99.86	0.83333	0.00013	0.8332
103	3432.24	86.39	0.01725	0.00013	0.01712					103	3972.67	99.99	0.83333	0.00012	0.83321
104	3522.48	88.66	0.01752	0.00014	0.01738					104	3971.98	99.97	0.83333	0.00016	0.83317
105	3657.32	92.05	0.01672	0.00012	0.0166					105	3968.36	99.88	0.83333	0.00012	0.83321
106	3587.85	90.31	0.01558	0.00013	0.01545					106	3954.9	99.54	0.83333	0.00012	0.83321
107	3628.58	91.33	0.01699	0.00014	0.01685					107	3972.67	99.99	0.83333	0.00014	0.83319
108	3582.17	90.16	0.01499	0.00014	0.01485					108	3971.46	99.96	0.83333	0.00012	0.83321
109	3512.5	88.41	0.01845	0.00013	0.01832					109	3973	100	0.83333	0.0001	0.83323
110	3679.36	92.61	0.0171	0.00012	0.01698					110	3972.35	99.98	0.83333	0.00012	0.83321
111	3524.33	88.71	0.016	0.00011	0.01589					111	3971.98	99.97	0.83333	0.0001	0.83323
112	3626.79	91.29	0.0198	0.00012	0.01968					112	3959.05	99.65	0.83333	0.00013	0.8332
113	3506.58	88.26	0.01956	0.00011	0.01945					113	3962.98	99.75	0.83333	0.00013	0.8332
114	3685.57	92.77	0.01663	0.00011	0.01652					114	3972.35	99.98	0.83333	0.00013	0.8332
115	3667.41	92.31	0.01645	0.00014	0.01631					115	3972.5	99.99	0.83333	0.00011	0.83322
116	3413.75	85.92	0.02037	0.00016	0.02021					116	3970.73	99.94	0.83333	0.00015	0.83318
117	3566.86	89.78	0.01806	0.00014	0.01792					117	3972.35	99.98	0.83333	0.00011	0.83322
118	3897.02	98.09	0.01531	0.0001	0.01521					118	3972.67	99.99	0.83333	0.00011	0.83322
119	3791.43	95.43	0.0147	0.0001	0.0146					119	3946.82	99.34	0.83333	0.0001	0.83323
120	3683.92	92.72	0.01924	0.00013	0.01911					120	3962.98	99.75	0.83333	0.00011	0.83322
121	3687.47	92.81	0.01875	0.00013	0.01862					121	3968.36	99.88	0.83333	0.00012	0.83321
122	3662.27	92.18	0.01681	0.00012	0.01669					122	3953.61	99.51	0.83333	0.00011	0.83322
123	3821.53	96.19	0.01528	0.0001	0.01518					123	3967.33	99.86	0.83333	0.00011	0.83322
124	3675.23	92.5	0.01629	0.00012	0.01617					124	3972.35	99.98	0.83333	0.00013	0.8332
125	3633.44	91.45	0.01808	0.0001	0.01798					125	3941.33	99.2	0.83333	0.00012	0.83321
126	3585.1	90.24	0.01818	0.00016	0.01802					126	3970.41	99.93	0.83333	0.00013	0.8332
127	3850.01	96.9	0.02128	0.0001	0.02118					127	3959.05	99.65	0.83333	0.00012	0.83321
128	3755.04	94.51	0.01464	0.00012	0.01452					128	3959.13	99.65	0.83333	0.00014	0.83319
129	3440.32	86.59	0.01785	0.00011	0.01774					129	3970.41	99.93	0.83333	0.00011	0.83322
130	3681.2	92.66	0.01795	0.00012	0.01783					130	3971.06	99.95	0.83333	0.00012	0.83321
131	3602.73	90.68	0.0178	0.00012	0.01768					131	3968.15	99.88	0.83333	0.00013	0.8332
132	3856.82	97.08	0.01654	0.00012	0.01642					132	3971.98	99.97	0.83333	0.00011	0.83322
133	3434.84	86.45	0.01837	0.00014	0.01823					133	3973	100	0.83333	0.00013	0.8332
134	3782.24	95.2	0.01526	0.0001	0.01516					134	3973	100	0.83333	0.0001	0.83323
135	3751.26	94.42	0.01852	0.0001	0.01842					135	3967.33	99.86	0.83333	0.00011	0.83322
136	3756.35	94.55	0.01639	0.00012	0.01627					136	3969.76	99.92	0.83333	0.00011	0.83322
137	3518.43	88.56	0.01772	0.00016	0.01756					137	3972.67	99.99	0.83333	0.00012	0.83321
138	3582.2	90.16	0.0175	0.00011	0.01739					138	3971.98	99.97	0.83333	0.00012	0.83321
139	3698.78	93.1	0.01806	0.00013	0.01793					139	3970.73	99.94	0.83333	0.00011	0.83322
140	3762.53	94.7	0.01604	0.00013	0.01591					140	3969.44	99.91	0.83333	0.0001	0.83323
141	3480.45	87.6	0.01743	0.00013	0.0173					141	3971.46	99.96	0.83333	0.00012	0.83321
142	3462.89	87.16	0.01843	0.00011	0.01832					142	3973	100	0.83333	0.00012	0.83321
143	3573.73	89.95	0.01843	0.00014	0.01829					143	3966.81	99.84	0.83333	0.00013	0.8332
144	3709.09	93.36	0.01587	0.00012	0.01575					144	3923.88	98.76	0.83333	0.00011	0.83322
145	3572.34	89.92	0.0179	0.00014	0.01776					145	3973	100	0.83333	0.00013	0.8332
146	3703.82	93.22	0.01825	0.00013	0.01812					146	3971.46	99.96	0.83333	9e-05	0.83324
147	3734.31	93.99	0.01531	0.00011	0.0152					147	3941.97	99.22	0.83333	0.00014	0.83319
148	3658.01	92.07	0.01671	0.00012	0.01659					148	3973	100	0.83333	0.00012	0.83321
149	3670.14	92.38	0.01727	0.00013	0.01714					149	3955.55	99.56	0.83333	0.00012	0.83321
150	3654.12	91.97	0.01655	0.0001	0.01645					150	3961.04	99.7	0.83333	0.00013	0.8332
151	3514.03	88.45	0.02	0.00013	0.01987					151	3972.35	99.98	0.83333	0.00012	0.83321
152	3746.62	94.3	0.01494	0.00013	0.01481					152	3970.41	99.93	0.83333	0.00013	0.8332
153	3771.89	94.94	0.01619	0.00013	0.01606					153	3972.67	99.99	0.83333	0.00012	0.83321
154	3586.73	90.28	0.01698	0.00012	0.01686					154	3936.16	99.07	0.83333	0.00012	0.83321
155	3793.61	95.48	0.01532	0.00012	0.0152					155	3972.5	99.99	0.83333	0.00012	0.83321
156	3645.67	91.76	0.01932	0.00014	0.01918					156	3949.41	99.41	0.83333	0.0001	0.83323
157	3734.68	94	0.01607	0.00013	0.01594					157	3970.73	99.94	0.83333	0.00011	0.83322
158	3749.76	94.38	0.0158	0.00011	0.01569					158	3970.41	99.93	0.83333	0.00013	0.8332
159	3584.67	90.23	0.01696	0.00012	0.01684					159	3972.67	99.99	0.83333	0.00014	0.83319
160	3815.36	96.03	0.01616	0.00014	0.01602					160	3972.03	99.98	0.83333	0.00014	0.83319
161	3771.39	94.93	0.02056	0.00012	0.02044					161	3973	100	0.83333	0.0001	0.83323
162	3837.88	96.6	0.01718	0.0001	0.01708					162	3970.73	99.94	0.83333	0.00012	0.83321
163	3718.5	93.59	0.01944	0.0001	0.01934					163	3969.12	99.9	0.83333	0.00011	0.83322
164	3696.15	93.03	0.01679	0.00013	0.01666					164	3817.88	96.1	0.83333	0.00015	0.83318
165	3551.06	89.38	0.01773	0.00011	0.01762					165	3971.7	99.97	0.83333	0.00014	0.83319
166	3862.49	97.22	0.02074	0.00011	0.02063					166	3968.88	99.9	0.83333	0.00015	0.83318
167	3582.86	90.18	0.01521	0.00011	0.0151					167	3964.59	99.79	0.83333	0.00013	0.8332
168	3470.22	87.34	0.01957	0.00015	0.01942					168	3968.88	99.9	0.83333	0.00015	0.83318
169	3711.03	93.41	0.01758	0.00013	0.01745					169	3969.12	99.9	0.83333	0.00011	0.83322
170	3514.7	88.46	0.01877	0.00011	0.01866					170	3973.01	100	0.83333	9e-05	0.83324
171	3449.22	86.82	0.0159	0.00013	0.01577					171	3972.35	99.98	0.83333	0.00014	0.83319
172	3799.9	95.64	0.0164	0.00012	0.01628					172	3955.95	99.57	0.83333	0.0001	0.83323
173	3842.73	96.72	0.01622	0.00011	0.01611					173	3973.01	100	0.83333	0.00011	0.83322
174	3458.88	87.06	0.01873	0.00012	0.01861					174	3972.67	99.99	0.83333	0.00014	0.83319
175	3489.64	87.83	0.01835	0.00015	0.0182					175	3969.39	99.91	0.83333	0.00013	0.8332
176	3813.63	95.99	0.0155	0.00011	0.01539					176	3972.03	99.98	0.83333	0.00011	0.83322
177	3629.67	91.36	0.01702	0.00012	0.0169					177	3972.35	99.98	0.83333	0.00011	0.83322
178	3581.54	90.15	0.01616	0.00013	0.01603					178	3970.43	99.94	0.83333	0.00011	0.83322
179	3693.2	92.96	0.01678	0.00014	0.01664					179	3972.03	99.98	0.83333	0.00011	0.83322
180	3688.35	92.84	0.0173	0.00013	0.01717					180	3971.06	99.95	0.83333	0.00013	0.8332
181	3882.64	97.73	0.01548	0.00012	0.01536					181	3968.88	99.9	0.83333	0.0001	0.83323
182	3589.04	90.34	0.01566	0.00011	0.01555					182	3649.83	91.87	0.83333	0.00011	0.83322
183	3603.9	90.71	0.02085	0.00013	0.02072					183	3970.73	99.94	0.83333	0.00011	0.83322
184	3547.12	89.28	0.01863	0.00012	0.01851					184	3934.76	99.04	0.83333	0.0001	0.83323
185	3608.64	90.83	0.01706	0.00012	0.01694					185	3971.06	99.95	0.83333	0.00011	0.83322
186	3730.19	93.89	0.01793	0.00011	0.01782					186	3972.67	99.99	0.83333	0.00014	0.83319
187	3756.71	94.56	0.01579	0.00011	0.01568					187	3842.44	96.71	0.83333	0.00011	0.83322
188	3519.95	88.6	0.01775	0.00013	0.01762					188	3972.5	99.99	0.83333	0.00011	0.83322
189	3740.88	94.16	0.01557	0.00013	0.01544					189	3972.67	99.99	0.83333	0.0001	0.83323
190	3545.97	89.25	0.01922	0.00014	0.01908					190	3972.03	99.98	0.83333	0.0001	0.83323
191	3563.98	89.7	0.01835	0.00011	0.01824					191	3970.95	99.95	0.83333	0.00013	0.8332
192	3657.13	92.05	0.01443	0.00012	0.01431					192	3967.5	99.86	0.83333	0.00011	0.83322
193	3641.86	91.67	0.01635	0.00012	0.01623					193	3973	100	0.83333	0.00011	0.83322
194	3469.32	87.32	0.01545	0.00012	0.01533					194	3965.78	99.82	0.83333	0.00013	0.8332
195	3706.24	93.29	0.01975	0.00014	0.01961					195	3972.35	99.98	0.83333	0.00012	0.83321
196	3723.25	93.71	0.01495	0.00011	0.01484					196	3938.09	99.12	0.83333	0.00012	0.83321
197	3679	92.6	0.02336	0.00011	0.02325					197	3900.12	98.17	0.83333	0.00012	0.83321
198	3748.85	94.36	0.01618	0.00014	0.01604					198	3972.35	99.98	0.83333	0.00011	0.83322
199	3543.99	89.2	0.01653	0.00012	0.01641					199	3971.46	99.96	0.83333	0.0001	0.83323
200	3544.43	89.21	0.01703	0.00015	0.01688					200	3970.41	99.93	0.83333	0.00013	0.8332

## Sheet: 07_BWACO_Seeds(167)
Fast Converegnce Exp							Fast Converegnce Exp			Slow Converegnce Exp							Slow Converegnce Exp
#	CBLF	Quality	Taumax	Taumin	DeltaTauminmax		Global Optimal Solution =	3932.81		#	CBLF	Quality	Taumax	Taumin	DeltaTauminmax		Global Optimal Solution =	3973.01
1	3807.33	95.83	0.0178	0.00013	0.01767		Minimum Optimal Solution =	3248.82		1	3973.01	100	0.83333	0.00013	0.8332		Minimum Optimal Solution =	3794.61
2	3609.32	90.85	0.01667	0.0001	0.01657		Mean of Optimal Solution =	3630.43		2	3879.6	97.65	0.83333	0.00012	0.83321		Mean of Optimal Solution =	3961.05
3	3613.19	90.94	0.01701	0.00013	0.01688		Median of Optimal Solution=	3630.43		3	3968.36	99.88	0.83333	0.0001	0.83323		Median of Optimal Solution =	3961.05
4	3544.94	89.23	0.01835	0.00015	0.0182		Solution Standrad Deviation =	130.912		4	3968.8	99.89	0.83333	0.00013	0.8332		Solution Standrad Deviation =	27.3539
5	3620.06	91.12	0.01741	0.00014	0.01727		Average Price =	12.325		5	3972.67	99.99	0.83333	0.00012	0.83321		Average Price =	112.565
6	3467.12	87.27	0.01814	0.00011	0.01803		Relaibility =	0		6	3971.98	99.97	0.83333	0.00012	0.83321		Relaibility =	57
7	3639.62	91.61	0.01702	0.0001	0.01692		Normalized Price =	NA		7	3966.29	99.83	0.83333	0.00012	0.83321		Normalized Price =	197.482
8	3512.18	88.4	0.01879	0.00014	0.01865		Average Solution Quality =	91.3773		8	3973.01	100	0.83333	0.0001	0.83323		Average Solution Quality =	99.6989
9	3437.93	86.53	0.01878	0.00013	0.01865		Average FDC =	-81.2985		9	3968.47	99.89	0.83333	0.00011	0.83322		Average FDC =	-512.242
10	3645.86	91.77	0.01689	0.00013	0.01676		Correlation Coefficent =	-1		10	3962.98	99.75	0.83333	0.00011	0.83322		Correlation Coefficent =	-0.92446
11	3655.57	92.01	0.01783	0.00012	0.01771		Solution Robustness =	27.7319		11	3967.18	99.85	0.83333	0.0001	0.83323		Solution Robustness =	144.808
12	3540.92	89.12	0.0172	0.00013	0.01707		Performance Rate =	0.00040568		12	3972.35	99.98	0.83333	0.00012	0.83321		Performance Rate =	0.0050637
13	3755.13	94.52	0.01633	0.00012	0.01621		Average Elapsed Time =	0.70372		13	3967.84	99.87	0.83333	0.00012	0.83321		Average Elapsed Time =	5.9741
14	3814.81	96.02	0.01946	0.0001	0.01936					14	3971.46	99.96	0.83333	0.0001	0.83323
15	3850.19	96.91	0.01507	0.00011	0.01496					15	3956.63	99.59	0.83333	0.00015	0.83318
16	3732.77	93.95	0.01663	0.00014	0.01649					16	3968.36	99.88	0.83333	0.00013	0.8332
17	3636.5	91.53	0.01633	0.0001	0.01623					17	3969.12	99.9	0.83333	0.00012	0.83321
18	3321.61	83.6	0.01905	0.00017	0.01888					18	3968.88	99.9	0.83333	0.00014	0.83319
19	3597.99	90.56	0.01848	0.00012	0.01836					19	3896.73	98.08	0.83333	0.0001	0.83323
20	3618.3	91.07	0.01684	0.00012	0.01672					20	3972.03	99.98	0.83333	0.00014	0.83319
21	3760.01	94.64	0.01549	0.0001	0.01539					21	3971.98	99.97	0.83333	0.00012	0.83321
22	3487.68	87.78	0.01577	0.00015	0.01562					22	3957.48	99.61	0.83333	0.0001	0.83323
23	3700.24	93.13	0.01429	0.0001	0.01419					23	3910.95	98.44	0.83333	0.00012	0.83321
24	3685.95	92.77	0.01651	0.00011	0.0164					24	3827.25	96.33	0.83333	0.0001	0.83323
25	3427.1	86.26	0.01761	0.00014	0.01747					25	3964.59	99.79	0.83333	0.0001	0.83323
26	3633.6	91.46	0.01697	0.00013	0.01684					26	3972.5	99.99	0.83333	0.00013	0.8332
27	3487.41	87.78	0.01815	0.00013	0.01802					27	3973.01	100	0.83333	0.00012	0.83321
28	3586.39	90.27	0.0173	0.00015	0.01715					28	3972.03	99.98	0.83333	0.00012	0.83321
29	3423.38	86.17	0.01768	0.00014	0.01754					29	3972.67	99.99	0.83333	0.00011	0.83322
30	3611.91	90.91	0.01652	0.00014	0.01638					30	3949.73	99.41	0.83333	0.00011	0.83322
31	3679.3	92.61	0.01536	0.00014	0.01522					31	3966.53	99.84	0.83333	0.00012	0.83321
32	3734.91	94.01	0.0159	0.00012	0.01578					32	3958.54	99.64	0.83333	0.00011	0.83322
33	3582.84	90.18	0.01696	0.00014	0.01682					33	3962.66	99.74	0.83333	0.00011	0.83322
34	3443.68	86.68	0.02013	0.00014	0.01999					34	3972.5	99.99	0.83333	0.0001	0.83323
35	3669.78	92.37	0.01598	0.00014	0.01584					35	3972.5	99.99	0.83333	0.00012	0.83321
36	3433.27	86.41	0.01949	0.00014	0.01935					36	3973	100	0.83333	0.00012	0.83321
37	3584.5	90.22	0.01622	0.00014	0.01608					37	3967.84	99.87	0.83333	0.0001	0.83323
38	3738.06	94.09	0.01628	0.00015	0.01613					38	3972.35	99.98	0.83333	0.00013	0.8332
39	3726.35	93.79	0.01572	0.00011	0.01561					39	3972.03	99.98	0.83333	0.00011	0.83322
40	3744.25	94.24	0.01682	0.00012	0.0167					40	3970.73	99.94	0.83333	0.00012	0.83321
41	3522.24	88.65	0.01718	0.00012	0.01706					41	3973	100	0.83333	0.00013	0.8332
42	3855.14	97.03	0.01925	0.00013	0.01912					42	3972.67	99.99	0.83333	0.00012	0.83321
43	3525.34	88.73	0.01814	0.00014	0.018					43	3972.67	99.99	0.83333	0.00012	0.83321
44	3635.1	91.49	0.01752	0.00012	0.0174					44	3971.98	99.97	0.83333	0.00012	0.83321
45	3649.03	91.85	0.01753	0.00013	0.0174					45	3966.86	99.85	0.83333	0.00011	0.83322
46	3746.29	94.29	0.01539	0.00011	0.01528					46	3973	100	0.83333	0.00013	0.8332
47	3524.58	88.71	0.01766	0.00013	0.01753					47	3972.5	99.99	0.83333	0.0001	0.83323
48	3616.11	91.02	0.02109	0.00011	0.02098					48	3971.98	99.97	0.83333	0.00014	0.83319
49	3580.89	90.13	0.02068	0.00013	0.02055					49	3972.67	99.99	0.83333	0.00013	0.8332
50	3641.55	91.66	0.01886	0.00012	0.01874					50	3967.18	99.85	0.83333	0.00011	0.83322
51	3735.07	94.01	0.01603	0.00013	0.0159					51	3967.33	99.86	0.83333	0.00012	0.83321
52	3633.62	91.46	0.01541	0.00012	0.01529					52	3973	100	0.83333	0.00014	0.83319
53	3692.97	92.95	0.01781	0.0001	0.01771					53	3953.37	99.51	0.83333	0.00013	0.8332
54	3661.43	92.16	0.016	0.00015	0.01585					54	3898.67	98.13	0.83333	0.00013	0.8332
55	3548.94	89.33	0.01955	0.00015	0.0194					55	3968.88	99.9	0.83333	0.0001	0.83323
56	3719.4	93.62	0.01639	0.00014	0.01625					56	3971.46	99.96	0.83333	0.00011	0.83322
57	3700.69	93.15	0.01638	0.00013	0.01625					57	3966.35	99.83	0.83333	0.00011	0.83322
58	3433.28	86.42	0.01809	0.00013	0.01796					58	3969.39	99.91	0.83333	0.0001	0.83323
59	3690.13	92.88	0.01326	9e-05	0.01317					59	3972.67	99.99	0.83333	0.00013	0.8332
60	3640.85	91.64	0.01866	0.00012	0.01854					60	3968.88	99.9	0.83333	0.00012	0.83321
61	3898.9	98.13	0.01351	0.0001	0.01341					61	3971.98	99.97	0.83333	0.0001	0.83323
62	3756.91	94.56	0.01666	0.00013	0.01653					62	3972.35	99.98	0.83333	0.00011	0.83322
63	3805.36	95.78	0.01703	0.00012	0.01691					63	3971.98	99.97	0.83333	0.0001	0.83323
64	3920.14	98.67	0.01517	0.00011	0.01506					64	3973	100	0.83333	0.00011	0.83322
65	3902.66	98.23	0.01638	0.00012	0.01626					65	3971.7	99.97	0.83333	0.00015	0.83318
66	3693.77	92.97	0.01648	0.00011	0.01637					66	3971.98	99.97	0.83333	0.00013	0.8332
67	3492.04	87.89	0.01693	0.00015	0.01678					67	3968.88	99.9	0.83333	0.00013	0.8332
68	3807.06	95.82	0.0147	0.00011	0.01459					68	3822.08	96.2	0.83333	0.00012	0.83321
69	3559.03	89.58	0.02216	0.00012	0.02204					69	3972.35	99.98	0.83333	0.00014	0.83319
70	3628.48	91.33	0.01827	0.00012	0.01815					70	3973	100	0.83333	0.00011	0.83322
71	3927.32	98.85	0.01535	0.0001	0.01525					71	3969.44	99.91	0.83333	0.00014	0.83319
72	3675.74	92.52	0.01737	0.00013	0.01724					72	3914.83	98.54	0.83333	0.0001	0.83323
73	3606.62	90.78	0.0192	0.00013	0.01907					73	3922.91	98.74	0.83333	0.00011	0.83322
74	3545.82	89.25	0.02005	0.00012	0.01993					74	3969.12	99.9	0.83333	0.00016	0.83317
75	3757.35	94.57	0.01588	0.00012	0.01576					75	3972.35	99.98	0.83333	0.00011	0.83322
76	3538.03	89.05	0.01832	0.00013	0.01819					76	3970.09	99.93	0.83333	0.00012	0.83321
77	3768.28	94.85	0.01591	0.00013	0.01578					77	3972.35	99.98	0.83333	0.00012	0.83321
78	3532.51	88.91	0.01747	0.00012	0.01735					78	3959.57	99.66	0.83333	0.00011	0.83322
79	3786.17	95.3	0.01539	0.0001	0.01529					79	3971.38	99.96	0.83333	0.0001	0.83323
80	3679.74	92.62	0.01452	0.00011	0.01441					80	3935.79	99.06	0.83333	0.00012	0.83321
81	3755.74	94.53	0.01593	0.00013	0.0158					81	3794.61	95.51	0.83333	0.00012	0.83321
82	3563.44	89.69	0.0192	0.00013	0.01907					82	3973	100	0.83333	0.00013	0.8332
83	3613.51	90.95	0.0167	0.00011	0.01659					83	3964.22	99.78	0.83333	0.00012	0.83321
84	3490.2	87.85	0.01799	0.00011	0.01788					84	3968.36	99.88	0.83333	0.00013	0.8332
85	3514.57	88.46	0.01954	0.00012	0.01942					85	3965.24	99.8	0.83333	9e-05	0.83324
86	3484.05	87.69	0.02147	0.00014	0.02133					86	3973	100	0.83333	0.00011	0.83322
87	3730.91	93.91	0.01605	0.00012	0.01593					87	3961.04	99.7	0.83333	0.00011	0.83322
88	3455.72	86.98	0.01941	0.00011	0.0193					88	3922.58	98.73	0.83333	0.0001	0.83323
89	3700.04	93.13	0.01823	0.00014	0.01809					89	3966.86	99.85	0.83333	0.00013	0.8332
90	3720.82	93.65	0.01945	0.00011	0.01934					90	3971.98	99.97	0.83333	0.0001	0.83323
91	3782.88	95.21	0.01682	0.00014	0.01668					91	3922.91	98.74	0.83333	0.00011	0.83322
92	3547.87	89.3	0.01898	0.00011	0.01887					92	3966.21	99.83	0.83333	0.00013	0.8332
93	3383.49	85.16	0.02003	0.00015	0.01988					93	3966.53	99.84	0.83333	0.00011	0.83322
94	3678.41	92.58	0.01758	0.00012	0.01746					94	3970.09	99.93	0.83333	0.00011	0.83322
95	3756.39	94.55	0.01674	0.00012	0.01662					95	3967.5	99.86	0.83333	0.00012	0.83321
96	3522.22	88.65	0.01841	0.00014	0.01827					96	3926.78	98.84	0.83333	0.00012	0.83321
97	3884.19	97.76	0.01575	0.00011	0.01564					97	3972.67	99.99	0.83333	9e-05	0.83324
98	3556.23	89.51	0.01729	0.00013	0.01716					98	3971.46	99.96	0.83333	0.00012	0.83321
99	3725.18	93.76	0.01747	0.00014	0.01733					99	3973	100	0.83333	0.0001	0.83323
100	3437.84	86.53	0.01932	0.00015	0.01917					100	3845.02	96.78	0.83333	0.00011	0.83322
101	3681.42	92.66	0.01681	0.0001	0.01671					101	3966.86	99.85	0.83333	0.00012	0.83321
102	3724.24	93.74	0.01671	0.00012	0.01659					102	3953.28	99.5	0.83333	0.00014	0.83319
103	3726.08	93.78	0.01604	0.00012	0.01592					103	3966.53	99.84	0.83333	0.00011	0.83322
104	3535.48	88.99	0.01823	0.00012	0.01811					104	3971.46	99.96	0.83333	0.0001	0.83323
105	3753.54	94.48	0.01634	0.0001	0.01624					105	3972.67	99.99	0.83333	0.00012	0.83321
106	3584.84	90.23	0.01848	0.00014	0.01834					106	3967.18	99.85	0.83333	0.00012	0.83321
107	3565.22	89.74	0.01656	0.00014	0.01642					107	3973.01	100	0.83333	0.00011	0.83322
108	3680.56	92.64	0.01633	0.00011	0.01622					108	3971.06	99.95	0.83333	0.0001	0.83323
109	3379.2	85.05	0.02099	0.00015	0.02084					109	3968.88	99.9	0.83333	0.00011	0.83322
110	3623.19	91.2	0.01613	0.0001	0.01603					110	3973.01	100	0.83333	0.00014	0.83319
111	3761.63	94.68	0.01752	0.00012	0.0174					111	3956.51	99.58	0.83333	0.00011	0.83322
112	3709.75	93.37	0.01817	0.00012	0.01805					112	3971.06	99.95	0.83333	0.00012	0.83321
113	3761.24	94.67	0.01533	0.00012	0.01521					113	3972.67	99.99	0.83333	0.00014	0.83319
114	3683.02	92.7	0.01626	0.00013	0.01613					114	3972.67	99.99	0.83333	0.00013	0.8332
115	3471.93	87.39	0.0178	0.00013	0.01767					115	3965.24	99.8	0.83333	0.00012	0.83321
116	3647.55	91.81	0.01784	0.00012	0.01772					116	3971.06	99.95	0.83333	0.0001	0.83323
117	3699.55	93.12	0.0182	0.00012	0.01808					117	3967.33	99.86	0.83333	0.00011	0.83322
118	3542.04	89.15	0.02016	0.00011	0.02005					118	3971.46	99.96	0.83333	0.00011	0.83322
119	3604.7	90.73	0.01721	0.00011	0.0171					119	3971.98	99.97	0.83333	0.00012	0.83321
120	3507.24	88.28	0.01748	0.00013	0.01735					120	3918.38	98.63	0.83333	0.00012	0.83321
121	3595.87	90.51	0.02192	0.00013	0.02179					121	3972.03	99.98	0.83333	0.00013	0.8332
122	3688.67	92.84	0.01552	0.00012	0.0154					122	3970.95	99.95	0.83333	0.00014	0.83319
123	3677.57	92.56	0.01551	0.00011	0.0154					123	3972.35	99.98	0.83333	0.00011	0.83322
124	3598.31	90.57	0.01429	0.00011	0.01418					124	3972.67	99.99	0.83333	0.00011	0.83322
125	3400.79	85.6	0.01962	0.00016	0.01946					125	3956.84	99.59	0.83333	0.00012	0.83321
126	3637.87	91.56	0.01727	0.00013	0.01714					126	3973	100	0.83333	0.00011	0.83322
127	3736.04	94.04	0.01756	0.00012	0.01744					127	3972.35	99.98	0.83333	0.00011	0.83322
128	3726.68	93.8	0.01673	0.00011	0.01662					128	3841.47	96.69	0.83333	0.00012	0.83321
129	3664.16	92.23	0.01713	0.00012	0.01701					129	3966.86	99.85	0.83333	0.0001	0.83323
130	3436.06	86.49	0.01823	0.00011	0.01812					130	3972.03	99.98	0.83333	0.00012	0.83321
131	3534.7	88.97	0.01714	0.00011	0.01703					131	3970.73	99.94	0.83333	0.00013	0.8332
132	3248.82	81.77	0.0224	0.00012	0.02228					132	3929.69	98.91	0.83333	0.00013	0.8332
133	3625.57	91.25	0.01765	0.00011	0.01754					133	3972.67	99.99	0.83333	0.00013	0.8332
134	3662.2	92.18	0.01787	0.00011	0.01776					134	3971.06	99.95	0.83333	0.00011	0.83322
135	3837.87	96.6	0.01662	0.00011	0.01651					135	3972.5	99.99	0.83333	0.00012	0.83321
136	3416.63	86	0.01847	0.00014	0.01833					136	3971.7	99.97	0.83333	0.00012	0.83321
137	3604.48	90.72	0.01613	0.0001	0.01603					137	3973	100	0.83333	0.0001	0.83323
138	3464.29	87.2	0.01815	0.00015	0.018					138	3973	100	0.83333	0.00012	0.83321
139	3552.5	89.42	0.01895	0.00013	0.01882					139	3972.67	99.99	0.83333	0.00012	0.83321
140	3646.62	91.78	0.0174	0.00012	0.01728					140	3972.5	99.99	0.83333	0.00012	0.83321
141	3885.59	97.8	0.01428	0.0001	0.01418					141	3962.15	99.73	0.83333	0.00014	0.83319
142	3707.27	93.31	0.0165	0.00011	0.01639					142	3971.98	99.97	0.83333	0.0001	0.83323
143	3842.45	96.71	0.01489	0.0001	0.01479					143	3973	100	0.83333	0.00011	0.83322
144	3495.71	87.99	0.01706	0.0001	0.01696					144	3967.18	99.85	0.83333	0.00012	0.83321
145	3683.36	92.71	0.01925	0.00014	0.01911					145	3971.06	99.95	0.83333	0.00011	0.83322
146	3663.74	92.22	0.0171	0.0001	0.017					146	3968.36	99.88	0.83333	0.0001	0.83323
147	3768.68	94.86	0.01505	0.00013	0.01492					147	3966.53	99.84	0.83333	0.00011	0.83322
148	3613.19	90.94	0.01739	0.00014	0.01725					148	3972.67	99.99	0.83333	9e-05	0.83324
149	3608.24	90.82	0.01627	0.00012	0.01615					149	3973.01	100	0.83333	0.0001	0.83323
150	3347.61	84.26	0.03572	0.00016	0.03556					150	3965.24	99.8	0.83333	0.00013	0.8332
151	3746.03	94.29	0.01881	0.0001	0.01871					151	3965.78	99.82	0.83333	0.00014	0.83319
152	3687.43	92.81	0.01868	0.00013	0.01855					152	3965.26	99.8	0.83333	0.00013	0.8332
153	3932.81	98.99	0.01493	0.00011	0.01482					153	3972.35	99.98	0.83333	0.00012	0.83321
154	3683.81	92.72	0.02102	0.00012	0.0209					154	3895.11	98.04	0.83333	0.00011	0.83322
155	3695.41	93.01	0.0206	0.00015	0.02045					155	3973	100	0.83333	0.00012	0.83321
156	3643.08	91.7	0.01757	0.00014	0.01743					156	3973	100	0.83333	0.00012	0.83321
157	3542.38	89.16	0.01931	0.00015	0.01916					157	3966.86	99.85	0.83333	0.00012	0.83321
158	3682.72	92.69	0.01762	0.00012	0.0175					158	3973	100	0.83333	0.00014	0.83319
159	3636.33	91.53	0.01944	0.00013	0.01931					159	3972.5	99.99	0.83333	0.00013	0.8332
160	3673.91	92.47	0.016	0.00012	0.01588					160	3972.5	99.99	0.83333	0.00011	0.83322
161	3747.39	94.32	0.01719	0.0001	0.01709					161	3972.35	99.98	0.83333	0.00013	0.8332
162	3556.08	89.51	0.01934	0.00014	0.0192					162	3966.86	99.85	0.83333	0.00011	0.83322
163	3639.58	91.61	0.01791	0.00013	0.01778					163	3971.46	99.96	0.83333	0.00012	0.83321
164	3561.55	89.64	0.01826	0.00014	0.01812					164	3971.46	99.96	0.83333	0.00016	0.83317
165	3768.8	94.86	0.01652	0.00012	0.0164					165	3952.85	99.49	0.83333	0.00011	0.83322
166	3664.75	92.24	0.01848	0.00012	0.01836					166	3972.67	99.99	0.83333	0.00013	0.8332
167	3679.69	92.62	0.01879	0.0001	0.01869					167	3972.35	99.98	0.83333	0.0001	0.83323
168	3736.16	94.04	0.0168	0.00013	0.01667					168	3961.12	99.7	0.83333	0.00013	0.8332
169	3821.53	96.19	0.01438	0.00013	0.01425					169	3892.53	97.97	0.83333	0.0001	0.83323
170	3859.55	97.14	0.01636	0.00013	0.01623					170	3935.83	99.06	0.83333	0.00011	0.83322
171	3469.98	87.34	0.01554	0.00014	0.0154					171	3964.92	99.8	0.83333	0.00014	0.83319
172	3759.01	94.61	0.01727	0.00012	0.01715					172	3953.37	99.51	0.83333	0.0001	0.83323
173	3656.13	92.02	0.0176	0.00015	0.01745					173	3973.01	100	0.83333	0.0001	0.83323
174	3354.5	84.43	0.01906	0.00012	0.01894					174	3929.05	98.89	0.83333	0.00011	0.83322
175	3419.25	86.06	0.02028	0.00013	0.02015					175	3969.76	99.92	0.83333	0.00012	0.83321
176	3584.47	90.22	0.01557	0.00011	0.01546					176	3972.35	99.98	0.83333	0.00014	0.83319
177	3859.36	97.14	0.01559	0.00011	0.01548					177	3969.44	99.91	0.83333	0.00011	0.83322
178	3763.11	94.72	0.01515	0.00012	0.01503					178	3960.83	99.69	0.83333	0.00013	0.8332
179	3544.73	89.22	0.01949	0.00013	0.01936					179	3967.84	99.87	0.83333	0.00011	0.83322
180	3575.07	89.98	0.01592	0.00011	0.01581					180	3972.5	99.99	0.83333	0.00013	0.8332
181	3425.46	86.22	0.01791	0.00015	0.01776					181	3972.35	99.98	0.83333	0.0001	0.83323
182	3538.63	89.07	0.0167	0.00011	0.01659					182	3972.5	99.99	0.83333	0.00011	0.83322
183	3692.38	92.94	0.0178	0.00012	0.01768					183	3973	100	0.83333	0.00012	0.83321
184	3642.31	91.68	0.01622	0.00011	0.01611					184	3971.98	99.97	0.83333	0.00011	0.83322
185	3483.28	87.67	0.01822	0.00013	0.01809					185	3972.35	99.98	0.83333	0.00012	0.83321
186	3597.86	90.56	0.01845	0.00011	0.01834					186	3968.36	99.88	0.83333	0.00012	0.83321
187	3513.82	88.44	0.01894	0.00012	0.01882					187	3970.09	99.93	0.83333	0.0001	0.83323
188	3533.52	88.94	0.01903	0.00012	0.01891					188	3938.42	99.13	0.83333	0.00012	0.83321
189	3708.47	93.34	0.01681	0.0001	0.01671					189	3972.35	99.98	0.83333	0.0001	0.83323
190	3632.57	91.43	0.01933	0.00013	0.0192					190	3972.67	99.99	0.83333	0.00014	0.83319
191	3628.2	91.32	0.01616	0.00013	0.01603					191	3956.47	99.58	0.83333	0.00013	0.8332
192	3703.15	93.21	0.01862	0.00011	0.01851					192	3971.06	99.95	0.83333	0.00013	0.8332
193	3678.87	92.6	0.01847	0.00014	0.01833					193	3972.35	99.98	0.83333	0.00012	0.83321
194	3580.44	90.12	0.01526	0.0001	0.01516					194	3970.09	99.93	0.83333	0.00013	0.8332
195	3386.22	85.23	0.01849	0.00013	0.01836					195	3973	100	0.83333	0.00013	0.8332
196	3373.36	84.91	0.02076	0.00014	0.02062					196	3967.84	99.87	0.83333	0.00011	0.83322
197	3678.24	92.58	0.01764	0.00012	0.01752					197	3937.77	99.11	0.83333	0.00011	0.83322
198	3286.2	82.71	0.01866	0.00015	0.01851					198	3972.35	99.98	0.83333	0.00014	0.83319
199	3588.69	90.33	0.01834	0.00014	0.0182					199	3970.73	99.94	0.83333	0.00011	0.83322
200	3555.19	89.48	0.01575	0.00012						200	3967.33	99.86	0.83333	0.00012	0.83321

## Sheet: 08_BWACO_Seeds(225)
Fast Converegnce Exp							Fast Converegnce Exp			Slow Converegnce Exp							Slow Converegnce Exp
#	CBLF	Quality	Taumax	Taumin	DeltaTauminmax		Global Optimal Solution =	3933.72		#	CBLF	Quality	Taumax	Taumin	DeltaTauminmax		Global Optimal Solution =	3973.01
1	3704.41	93.24	0.0168	9e-05	0.01671		Minimum Optimal Solution =	3225.32		1	3949.41	99.41	0.83333	9e-05	0.83324		Minimum Optimal Solution =	3636.9
2	3548.74	89.32	0.01883	0.00011	0.01872		Mean of Optimal Solution =	3621.46		2	3972.67	99.99	0.83333	0.00012	0.83321		Mean of Optimal Solution =	3954.53
3	3577.64	90.05	0.01815	0.00014	0.01801		Median of Optimal Solution=	3621.46		3	3973	100	0.83333	0.00015	0.83318		Median of Optimal Solution =	3954.53
4	3616.11	91.02	0.0194	0.00013	0.01927		Solution Standrad Deviation =	133.878		4	3968.88	99.9	0.83333	0.00014	0.83319		Solution Standrad Deviation =	46.9158
5	3630.53	91.38	0.01831	0.0001	0.01821		Average Price =	12.26		5	3971.06	99.95	0.83333	0.0001	0.83323		Average Price =	112.41
6	3430.51	86.35	0.02261	0.00011	0.0225		Relability =	0		6	3972.5	99.99	0.83333	0.00013	0.8332		Relability =	57
7	3498.77	88.06	0.0169	0.00011	0.01679		Normalized Price =	65535		7	3712.2	93.44	0.83333	0.0001	0.83323		Normalized Price =	197.21
8	3614.58	90.98	0.01753	0.00013	0.0174		Average Solution Quality =	91.1515		8	3970.73	99.94	0.83333	0.0001	0.83323		Average Solution Quality =	99.5349
9	3548.41	89.31	0.0195	0.00016	0.01934		Average FDC =	-86.5022		9	3951.02	99.45	0.83333	0.00011	0.83322		Average FDC =	-510.423
10	3225.32	81.18	0.01756	0.00016	0.0174		Correlation Coefficent =	-1		10	3971.46	99.96	0.83333	0.00013	0.8332		Correlation Coefficent =	-0.92239
11	3680.69	92.64	0.01461	0.00012	0.01449		Solution Robustness =	27.0505		11	3972.67	99.99	0.83333	0.00014	0.83319		Solution Robustness =	84.2899
12	3557.91	89.55	0.01641	0.00011	0.0163		Performance Rate =	0.00040783		12	3969.39	99.91	0.83333	0.00014	0.83319		Performance Rate =	0.0050707
13	3692.81	92.95	0.01684	9e-05	0.01675		Average Elapsed Time =	0.70128		13	3972.67	99.99	0.83333	0.00013	0.8332		Average Elapsed Time =	5.9253
14	3572.02	89.91	0.01701	0.00013	0.01688					14	3966.86	99.85	0.83333	0.0001	0.83323
15	3529.74	88.84	0.01846	0.00015	0.01831					15	3972.67	99.99	0.83333	0.00011	0.83322
16	3721.24	93.66	0.01809	0.0001	0.01799					16	3972.35	99.98	0.83333	0.00011	0.83322
17	3643.96	91.72	0.01678	0.00013	0.01665					17	3970.09	99.93	0.83333	0.00013	0.8332
18	3785	95.27	0.01623	0.00012	0.01611					18	3966.53	99.84	0.83333	0.00011	0.83322
19	3677.12	92.55	0.01804	0.00011	0.01793					19	3973	100	0.83333	0.0001	0.83323
20	3730.38	93.89	0.01882	0.00014	0.01868					20	3970.41	99.93	0.83333	0.00014	0.83319
21	3690.41	92.89	0.01647	0.00013	0.01634					21	3931.95	98.97	0.83333	0.0001	0.83323
22	3591.78	90.4	0.01829	0.00012	0.01817					22	3973	100	0.83333	0.00014	0.83319
23	3339.81	84.06	0.02037	0.00011	0.02026					23	3972.35	99.98	0.83333	0.00012	0.83321
24	3827.58	96.34	0.0155	0.00011	0.01539					24	3961.36	99.71	0.83333	0.00011	0.83322
25	3735.4	94.02	0.01544	0.00013	0.01531					25	3973.01	100	0.83333	0.00013	0.8332
26	3634.4	91.48	0.01738	0.00011	0.01727					26	3970.73	99.94	0.83333	0.00014	0.83319
27	3491.01	87.87	0.01939	0.00012	0.01927					27	3972.35	99.98	0.83333	0.00011	0.83322
28	3806.03	95.8	0.01575	0.00011	0.01564					28	3959.1	99.65	0.83333	0.00013	0.8332
29	3535.98	89	0.01803	0.00013	0.0179					29	3963.3	99.76	0.83333	0.00011	0.83322
30	3546.74	89.27	0.01646	0.00014	0.01632					30	3824.99	96.27	0.83333	0.00013	0.8332
31	3408.97	85.8	0.01957	0.00014	0.01943					31	3968.88	99.9	0.83333	0.00012	0.83321
32	3393.04	85.4	0.02519	0.00014	0.02505					32	3958.45	99.63	0.83333	0.00012	0.83321
33	3714.41	93.49	0.01436	0.0001	0.01426					33	3968.36	99.88	0.83333	0.0001	0.83323
34	3861.5	97.19	0.01943	0.00011	0.01932					34	3973.01	100	0.83333	0.0001	0.83323
35	3534.28	88.96	0.01889	0.00015	0.01874					35	3972.67	99.99	0.83333	0.00011	0.83322
36	3699.68	93.12	0.0164	0.00012	0.01628					36	3724.16	93.74	0.83333	0.0001	0.83323
37	3747.88	94.33	0.01591	0.00012	0.01579					37	3972.67	99.99	0.83333	0.00011	0.83322
38	3535.41	88.99	0.01785	0.0001	0.01775					38	3932.92	98.99	0.83333	0.00013	0.8332
39	3329.64	83.81	0.02547	0.00014	0.02533					39	3916.44	98.58	0.83333	0.00011	0.83322
40	3668.97	92.35	0.01767	0.00011	0.01756					40	3885.42	97.8	0.83333	9e-05	0.83324
41	3691.6	92.92	0.01678	0.00012	0.01666					41	3968.36	99.88	0.83333	0.00012	0.83321
42	3681.62	92.67	0.01726	0.00011	0.01715					42	3950.08	99.42	0.83333	0.00011	0.83322
43	3608.37	90.82	0.0158	0.00012	0.01568					43	3972.5	99.99	0.83333	0.0001	0.83323
44	3872.66	97.47	0.01609	0.0001	0.01599					44	3972.67	99.99	0.83333	0.00013	0.8332
45	3501.43	88.13	0.01907	0.00014	0.01893					45	3949.08	99.4	0.83333	0.00011	0.83322
46	3435.53	86.47	0.01977	0.00013	0.01964					46	3972.67	99.99	0.83333	0.00011	0.83322
47	3673.42	92.46	0.02061	0.00011	0.0205					47	3972.35	99.98	0.83333	0.00012	0.83321
48	3560.45	89.62	0.01662	0.00013	0.01649					48	3971.46	99.96	0.83333	0.00012	0.83321
49	3569.1	89.83	0.01711	0.00015	0.01696					49	3973	100	0.83333	0.00012	0.83321
50	3809.26	95.88	0.01762	0.00011	0.01751					50	3971.46	99.96	0.83333	0.00011	0.83322
51	3709.3	93.36	0.01583	0.00014	0.01569					51	3967.5	99.86	0.83333	0.0001	0.83323
52	3660.33	92.13	0.01675	0.00011	0.01664					52	3968.82	99.89	0.83333	0.00012	0.83321
53	3499.12	88.07	0.01903	0.00013	0.0189					53	3973	100	0.83333	0.00013	0.8332
54	3606.23	90.77	0.01985	0.00013	0.01972					54	3972.03	99.98	0.83333	0.0001	0.83323
55	3551.87	89.4	0.01625	0.00011	0.01614					55	3951.34	99.45	0.83333	0.00011	0.83322
56	3577.83	90.05	0.01779	0.00013	0.01766					56	3971.46	99.96	0.83333	0.00012	0.83321
57	3400.3	85.58	0.01969	0.00018	0.01951					57	3964.59	99.79	0.83333	0.00011	0.83322
58	3755.79	94.53	0.0193	0.00011	0.01919					58	3971.98	99.97	0.83333	0.00012	0.83321
59	3825.42	96.29	0.01673	0.00013	0.0166					59	3972.5	99.99	0.83333	0.00011	0.83322
60	3595.54	90.5	0.02092	0.0001	0.02082					60	3972.35	99.98	0.83333	0.00012	0.83321
61	3596.09	90.51	0.0167	0.00014	0.01656					61	3968.88	99.9	0.83333	0.0001	0.83323
62	3646.11	91.77	0.01852	0.00013	0.01839					62	3965.24	99.8	0.83333	0.00011	0.83322
63	3555.13	89.48	0.01912	0.00013	0.01899					63	3972.67	99.99	0.83333	0.00011	0.83322
64	3441.21	86.61	0.0172	0.00013	0.01707					64	3963.62	99.76	0.83333	0.00011	0.83322
65	3765.94	94.79	0.01368	0.00011	0.01357					65	3969.39	99.91	0.83333	0.00013	0.8332
66	3633	91.44	0.01571	0.00013	0.01558					66	3972.67	99.99	0.83333	0.0001	0.83323
67	3725.37	93.77	0.01571	0.00012	0.01559					67	3955.22	99.55	0.83333	0.0001	0.83323
68	3512.54	88.41	0.01925	0.00014	0.01911					68	3967.84	99.87	0.83333	0.00011	0.83322
69	3394.43	85.44	0.02038	0.00013	0.02025					69	3972.67	99.99	0.83333	0.00012	0.83321
70	3716.32	93.54	0.01907	0.00013	0.01894					70	3973	100	0.83333	0.00012	0.83321
71	3400.82	85.6	0.0179	0.00014	0.01776					71	3929.07	98.89	0.83333	0.00012	0.83321
72	3444.32	86.69	0.01827	0.00016	0.01811					72	3966.53	99.84	0.83333	0.0001	0.83323
73	3730.14	93.89	0.01999	0.00012	0.01987					73	3970.09	99.93	0.83333	0.0001	0.83323
74	3595.99	90.51	0.0172	0.00011	0.01709					74	3972.67	99.99	0.83333	0.00013	0.8332
75	3650.41	91.88	0.01583	0.00011	0.01572					75	3970.73	99.94	0.83333	0.0001	0.83323
76	3544.43	89.21	0.01905	0.00015	0.0189					76	3973.01	100	0.83333	0.00011	0.83322
77	3582.19	90.16	0.01869	0.00012	0.01857					77	3959.05	99.65	0.83333	0.00013	0.8332
78	3823.09	96.23	0.01531	0.00013	0.01518					78	3970.41	99.93	0.83333	0.00011	0.83322
79	3562.58	89.67	0.01965	0.0001	0.01955					79	3970.73	99.94	0.83333	0.00014	0.83319
80	3713.99	93.48	0.01648	0.00014	0.01634					80	3972.67	99.99	0.83333	0.0001	0.83323
81	3738.19	94.09	0.0157	0.00011	0.01559					81	3972.35	99.98	0.83333	0.00015	0.83318
82	3691.9	92.92	0.01666	0.00013	0.01653					82	3972.67	99.99	0.83333	0.00011	0.83322
83	3568.3	89.81	0.01563	0.00012	0.01551					83	3972.5	99.99	0.83333	0.00012	0.83321
84	3628.8	91.34	0.01614	0.00013	0.01601					84	3972.03	99.98	0.83333	0.00012	0.83321
85	3597.9	90.56	0.01724	0.00012	0.01712					85	3969.12	99.9	0.83333	0.00012	0.83321
86	3712.45	93.44	0.0182	0.00014	0.01806					86	3877.02	97.58	0.83333	0.00013	0.8332
87	3557.28	89.54	0.01676	0.00011	0.01665					87	3972.35	99.98	0.83333	0.00013	0.8332
88	3640.51	91.63	0.01851	0.00014	0.01837					88	3747.75	94.33	0.83333	0.0001	0.83323
89	3452.3	86.89	0.01826	0.00015	0.01811					89	3971.98	99.97	0.83333	0.0001	0.83323
90	3842.73	96.72	0.01492	0.00012	0.0148					90	3963.19	99.75	0.83333	0.00013	0.8332
91	3631.79	91.41	0.01586	0.00014	0.01572					91	3971.46	99.96	0.83333	0.00013	0.8332
92	3489.04	87.82	0.01933	0.00011	0.01922					92	3965.78	99.82	0.83333	0.00011	0.83322
93	3545.03	89.23	0.01912	0.00016	0.01896					93	3903.19	98.24	0.83333	0.00012	0.83321
94	3533.24	88.93	0.01687	0.00014	0.01673					94	3971.06	99.95	0.83333	0.00011	0.83322
95	3755.79	94.53	0.01887	0.0001	0.01877					95	3971.98	99.97	0.83333	0.00012	0.83321
96	3504.5	88.21	0.01841	0.00013	0.01828					96	3972.67	99.99	0.83333	0.00013	0.8332
97	3771.7	94.93	0.01501	0.00013	0.01488					97	3972.67	99.99	0.83333	0.00012	0.83321
98	3540.15	89.11	0.01946	0.00016	0.0193					98	3967.84	99.87	0.83333	0.00014	0.83319
99	3878.15	97.61	0.01507	0.00011	0.01496					99	3962.15	99.73	0.83333	0.00014	0.83319
100	3331.62	83.86	0.01989	0.0002	0.01969					100	3971.06	99.95	0.83333	0.00011	0.83322
101	3628.5	91.33	0.01911	0.00012	0.01899					101	3971.46	99.96	0.83333	0.00011	0.83322
102	3933.72	99.01	0.0146	0.00013	0.01447					102	3934.22	99.02	0.83333	0.00012	0.83321
103	3570.44	89.87	0.02084	0.00014	0.0207					103	3972.5	99.99	0.83333	9e-05	0.83324
104	3533.34	88.93	0.01916	0.00013	0.01903					104	3965.24	99.8	0.83333	0.00012	0.83321
105	3858.21	97.11	0.01612	0.00012	0.016					105	3968.36	99.88	0.83333	0.00014	0.83319
106	3864.96	97.28	0.01535	0.00012	0.01523					106	3965.24	99.8	0.83333	0.00012	0.83321
107	3463.55	87.18	0.01806	0.00014	0.01792					107	3972.35	99.98	0.83333	0.00011	0.83322
108	3718.31	93.59	0.01646	0.00012	0.01634					108	3970.09	99.93	0.83333	0.00011	0.83322
109	3665.91	92.27	0.01719	0.00014	0.01705					109	3970.95	99.95	0.83333	0.00012	0.83321
110	3716.34	93.54	0.01572	0.00013	0.01559					110	3973	100	0.83333	0.00012	0.83321
111	3737.94	94.08	0.02044	0.00011	0.02033					111	3926.78	98.84	0.83333	0.00014	0.83319
112	3902.19	98.22	0.01551	0.00012	0.01539					112	3971.46	99.96	0.83333	0.00012	0.83321
113	3498.1	88.05	0.01799	0.00012	0.01787					113	3972.5	99.99	0.83333	0.00014	0.83319
114	3571.67	89.9	0.01706	0.00014	0.01692					114	3968.8	99.89	0.83333	0.00012	0.83321
115	3505.92	88.24	0.01712	0.00014	0.01698					115	3971.46	99.96	0.83333	0.00013	0.8332
116	3639.28	91.6	0.01699	0.00014	0.01685					116	3973.01	100	0.83333	0.00012	0.83321
117	3447.93	86.78	0.02025	0.00017	0.02008					117	3963.3	99.76	0.83333	0.00012	0.83321
118	3737.12	94.06	0.01524	0.00013	0.01511					118	3950.27	99.43	0.83333	9e-05	0.83324
119	3770.21	94.9	0.01663	0.00012	0.01651					119	3947.79	99.37	0.83333	0.0001	0.83323
120	3507.01	88.27	0.01731	0.00013	0.01718					120	3972.35	99.98	0.83333	0.00011	0.83322
121	3565.68	89.75	0.01724	0.00016	0.01708					121	3874.43	97.52	0.83333	0.00011	0.83322
122	3329.9	83.81	0.02129	0.00019	0.0211					122	3915.15	98.54	0.83333	0.00012	0.83321
123	3629.4	91.35	0.01801	0.00013	0.01788					123	3973	100	0.83333	0.00011	0.83322
124	3730.89	93.91	0.01681	0.00011	0.0167					124	3962.66	99.74	0.83333	0.00011	0.83322
125	3626.93	91.29	0.01789	0.00012	0.01777					125	3966.21	99.83	0.83333	0.00013	0.8332
126	3758.74	94.61	0.01845	0.00011	0.01834					126	3969.39	99.91	0.83333	0.00014	0.83319
127	3697.1	93.06	0.02087	0.00011	0.02076					127	3972.5	99.99	0.83333	0.00012	0.83321
128	3815.62	96.04	0.01581	0.00011	0.0157					128	3936.82	99.09	0.83333	0.0001	0.83323
129	3650.86	91.89	0.01531	0.00011	0.0152					129	3950.7	99.44	0.83333	0.00013	0.8332
130	3715.97	93.53	0.01564	0.00013	0.01551					130	3972.35	99.98	0.83333	0.00012	0.83321
131	3505.72	88.24	0.0192	0.00012	0.01908					131	3972.35	99.98	0.83333	0.00012	0.83321
132	3675.84	92.52	0.0182	0.00012	0.01808					132	3972.03	99.98	0.83333	0.00011	0.83322
133	3510.61	88.36	0.01671	0.00015	0.01656					133	3945.1	99.3	0.83333	0.0001	0.83323
134	3626.59	91.28	0.01832	9e-05	0.01823					134	3636.91	91.54	0.83333	0.00013	0.8332
135	3693.78	92.97	0.01846	0.0001	0.01836					135	3967.5	99.86	0.83333	0.00013	0.8332
136	3602.55	90.68	0.02001	0.00012	0.01989					136	3972.5	99.99	0.83333	0.0001	0.83323
137	3692.41	92.94	0.01835	0.00013	0.01822					137	3961.36	99.71	0.83333	0.00014	0.83319
138	3662.24	92.18	0.01967	0.00015	0.01952					138	3971.06	99.95	0.83333	0.00011	0.83322
139	3620.98	91.14	0.01683	0.00013	0.0167					139	3926.78	98.84	0.83333	0.00014	0.83319
140	3636.84	91.54	0.01766	0.00012	0.01754					140	3968.8	99.89	0.83333	0.00013	0.8332
141	3731.06	93.91	0.017	0.00014	0.01686					141	3971.98	99.97	0.83333	0.00012	0.83321
142	3678.7	92.59	0.01713	9e-05	0.01704					142	3964.92	99.8	0.83333	0.00012	0.83321
143	3574.29	89.96	0.01861	0.00014	0.01847					143	3972.67	99.99	0.83333	0.0001	0.83323
144	3648.52	91.83	0.01846	0.00012	0.01834					144	3971.98	99.97	0.83333	0.00012	0.83321
145	3568.27	89.81	0.01669	0.00013	0.01656					145	3963.3	99.76	0.83333	0.00013	0.8332
146	3718.65	93.6	0.01735	0.00015	0.0172					146	3971.98	99.97	0.83333	0.00011	0.83322
147	3797.96	95.59	0.016	0.00011	0.01589					147	3972.35	99.98	0.83333	0.00011	0.83322
148	3530.14	88.85	0.01983	0.00011	0.01972					148	3972.67	99.99	0.83333	0.00011	0.83322
149	3493.14	87.92	0.01881	0.00015	0.01866					149	3958.54	99.64	0.83333	0.0001	0.83323
150	3530.26	88.86	0.02035	0.00011	0.02024					150	3972.67	99.99	0.83333	0.00011	0.83322
151	3558.69	89.57	0.01627	0.00011	0.01616					151	3868.29	97.36	0.83333	0.0001	0.83323
152	3636.6	91.53	0.01597	0.00011	0.01586					152	3783.3	95.22	0.83333	9e-05	0.83324
153	3677.39	92.56	0.01645	0.00013	0.01632					153	3943.59	99.26	0.83333	0.00011	0.83322
154	3594.01	90.46	0.01677	0.00011	0.01666					154	3973	100	0.83333	0.00011	0.83322
155	3620.47	91.13	0.01859	0.00012	0.01847					155	3970.41	99.93	0.83333	0.0001	0.83323
156	3505.37	88.23	0.02065	0.00014	0.02051					156	3973.01	100	0.83333	0.00013	0.8332
157	3544.27	89.21	0.01897	0.00015	0.01882					157	3966.21	99.83	0.83333	0.00011	0.83322
158	3404.22	85.68	0.02039	0.00012	0.02027					158	3972.67	99.99	0.83333	0.00011	0.83322
159	3672.59	92.44	0.01897	0.0001	0.01887					159	3972.67	99.99	0.83333	0.0001	0.83323
160	3499.76	88.09	0.01619	0.00011	0.01608					160	3966.53	99.84	0.83333	0.00011	0.83322
161	3263.35	82.14	0.01949	0.00014	0.01935					161	3866.35	97.32	0.83333	0.00011	0.83322
162	3595	90.49	0.01683	0.00013	0.0167					162	3971.98	99.97	0.83333	0.00011	0.83322
163	3688.64	92.84	0.01757	0.00011	0.01746					163	3947.14	99.35	0.83333	0.00012	0.83321
164	3457.77	87.03	0.02159	0.00012	0.02147					164	3966.81	99.84	0.83333	0.0001	0.83323
165	3711.09	93.41	0.01839	0.00011	0.01828					165	3971.98	99.97	0.83333	0.00013	0.8332
166	3521.01	88.62	0.018	0.00012	0.01788					166	3971.46	99.96	0.83333	0.00012	0.83321
167	3685.59	92.77	0.01852	0.00013	0.01839					167	3973.01	100	0.83333	0.00011	0.83322
168	3899.13	98.14	0.015	0.0001	0.0149					168	3968.88	99.9	0.83333	0.00011	0.83322
169	3770.61	94.91	0.01598	0.00013	0.01585					169	3755.51	94.53	0.83333	0.00011	0.83322
170	3718.76	93.6	0.01706	0.00013	0.01693					170	3972.03	99.98	0.83333	0.00012	0.83321
171	3609.63	90.85	0.01771	0.00011	0.0176					171	3972.03	99.98	0.83333	0.00011	0.83322
172	3383.58	85.16	0.01946	0.00013	0.01933					172	3973	100	0.83333	0.00011	0.83322
173	3846.42	96.81	0.01815	0.00012	0.01803					173	3933.89	99.02	0.83333	0.00011	0.83322
174	3555.63	89.49	0.0182	0.00014	0.01806					174	3973	100	0.83333	0.00013	0.8332
175	3746.13	94.29	0.01555	0.00012	0.01543					175	3971.98	99.97	0.83333	0.00012	0.83321
176	3864.18	97.26	0.01594	0.00012	0.01582					176	3957.16	99.6	0.83333	0.00013	0.8332
177	3854.3	97.01	0.01952	0.00012	0.0194					177	3972.35	99.98	0.83333	0.00012	0.83321
178	3636.02	91.52	0.01906	0.00012	0.01894					178	3953.37	99.51	0.83333	0.0001	0.83323
179	3742.37	94.19	0.01766	0.00013	0.01753					179	3971.98	99.97	0.83333	0.00013	0.8332
180	3655.54	92.01	0.01653	0.00015	0.01638					180	3879.6	97.65	0.83333	9e-05	0.83324
181	3564.19	89.71	0.01862	0.00016	0.01846					181	3953.37	99.51	0.83333	0.00012	0.83321
182	3590.65	90.38	0.01746	0.00012	0.01734					182	3959.1	99.65	0.83333	0.0001	0.83323
183	3704.18	93.23	0.01583	0.00013	0.0157					183	3973	100	0.83333	0.0001	0.83323
184	3533.39	88.93	0.017	0.00012	0.01688					184	3972.67	99.99	0.83333	0.00012	0.83321
185	3796.72	95.56	0.01528	0.00012	0.01516					185	3968.88	99.9	0.83333	0.00013	0.8332
186	3796.72	95.56	0.01588	0.00011	0.01577					186	3972.67	99.99	0.83333	0.00012	0.83321
187	3769.51	94.88	0.01723	0.0001	0.01713					187	3872.17	97.46	0.83333	0.00011	0.83322
188	3421.36	86.11	0.02153	0.00014	0.02139					188	3955.55	99.56	0.83333	0.00011	0.83322
189	3540.58	89.12	0.01861	0.00015	0.01846					189	3969.39	99.91	0.83333	0.00016	0.83317
190	3461.94	87.14	0.01963	0.00014	0.01949					190	3973	100	0.83333	0.00013	0.8332
191	3372.92	84.9	0.02015	0.00016	0.01999					191	3969.39	99.91	0.83333	0.00013	0.8332
192	3693.89	92.97	0.01735	0.0001	0.01725					192	3973	100	0.83333	0.0001	0.83323
193	3472.41	87.4	0.01677	0.00015	0.01662					193	3960.39	99.68	0.83333	0.00012	0.83321
194	3318.53	83.53	0.02	0.00019	0.01981					194	3971.06	99.95	0.83333	0.0001	0.83323
195	3728.46	93.84	0.01878	0.00013	0.01865					195	3971.46	99.96	0.83333	0.00012	0.83321
196	3590.34	90.37	0.01812	0.0001	0.01802					196	3966.53	99.84	0.83333	0.00014	0.83319
197	3604.4	90.72	0.02002	0.00013	0.01989					197	3972.67	99.99	0.83333	0.00011	0.83322
198	3638.25	91.57	0.01678	0.00012	0.01666					198	3973.01	100	0.83333	0.00012	0.83321
199	3783.79	95.24	0.01714	0.00012	0.01702					199	3920.64	98.68	0.83333	0.00012	0.83321
200	3591.48	90.4	0.02053	0.00014	0.02039					200	3972.67	99.99	0.83333	0.00012	0.83321

## Sheet: 09_BWACO_Seeds(11)
Fast Converegnce Exp							Fast Converegnce Exp			Slow Converegnce Exp							Slow Converegnce Exp
#	CBLF	Quality	Taumax	Taumin	DeltaTauminmax		Global Optimal Solution =	3937.86		#	CBLF	Quality	Taumax	Taumin	DeltaTauminmax		Global Optimal Solution =	3973.01
1	3797.34	95.58	0.01548	0.00012	0.01536		Minimum Optimal Solution =	3263.01		1	3968.36	99.88	0.83333	0.00011	0.83322		Minimum Optimal Solution =	3759.38
2	3576.5	90.02	0.01938	0.00013	0.01925		Mean of Optimal Solution =	3636.53		2	3972.35	99.98	0.83333	0.00011	0.83322		Mean of Optimal Solution =	3962.09
3	3718.63	93.6	0.01527	0.0001	0.01517		Median of Optimal Solution =	3636.53		3	3972.35	99.98	0.83333	0.00011	0.83322		Median of Optimal Solution =	3962.09
4	3467.54	87.28	0.02113	0.00015	0.02098		Solution Standrad Deviation =	137.8		4	3972.35	99.98	0.83333	0.00012	0.83321		Solution Standrad Deviation =	27.0952
5	3596.35	90.52	0.01767	0.00014	0.01753		Average Price =	12.54		5	3972.35	99.98	0.83333	0.00011	0.83322		Average Price =	110.905
6	3725.37	93.77	0.01702	0.00011	0.01691		Relability =	0		6	3967.84	99.87	0.83333	0.00013	0.8332		Relability =	59.5
7	3563.19	89.68	0.01835	0.00013	0.01822		Normalized Price =	65535		7	3972.67	99.99	0.83333	0.00012	0.83321		Normalized Price =	186.395
8	3898.97	98.14	0.01609	0.00011	0.01598		Average Solution Quality =	91.531		8	3973	100	0.83333	0.00011	0.83322		Average Solution Quality =	99.7252
9	3713.49	93.47	0.01978	0.00012	0.01966		Average FDC =	-88.4664		9	3973	100	0.83333	0.00013	0.8332		Average FDC =	-502.098
10	3679.15	92.6	0.01726	0.00013	0.01713		Correlation Coefficent =	-1		10	3970.41	99.93	0.83333	0.00015	0.83318		Correlation Coefficent =
11	3690.41	92.89	0.01689	0.00013	0.01676		Solution Robustness =	26.39		11	3959.05	99.65	0.83333	0.00014	0.83319		Solution Robustness =	146.228
12	3653.27	91.95	0.01444	0.00012	0.01432		Performance Rate =	0.00039872		12	3968.36	99.88	0.83333	0.00011	0.83322		Performance Rate =	0.005365
13	3592.69	90.43	0.01752	0.00011	0.01741		Average Elapsed Time =	0.72061		13	3973	100	0.83333	0.00015	0.83318		Average Elapsed Time =	5.9253
14	3547.87	89.3	0.01977	0.00011	0.01966					14	3968.36	99.88	0.83333	0.00011	0.83322
15	3539.26	89.08	0.01809	0.00011	0.01798					15	3970.09	99.93	0.83333	0.00014	0.83319
16	3599.74	90.6	0.01696	0.00011	0.01685					16	3972.5	99.99	0.83333	0.00012	0.83321
17	3500.83	88.12	0.0185	0.00014	0.01836					17	3973	100	0.83333	0.00011	0.83322
18	3515.72	88.49	0.018	0.0001	0.0179					18	3970.09	99.93	0.83333	0.0001	0.83323
19	3623.05	91.19	0.01789	0.00011	0.01778					19	3969.12	99.9	0.83333	0.00014	0.83319
20	3735.59	94.02	0.01558	0.00011	0.01547					20	3972.03	99.98	0.83333	0.00012	0.83321
21	3628.07	91.32	0.01888	0.00012	0.01876					21	3759.38	94.62	0.83333	0.00011	0.83322
22	3769.96	94.89	0.01728	0.0001	0.01718					22	3968.88	99.9	0.83333	0.00012	0.83321
23	3465.55	87.23	0.0195	0.00015	0.01935					23	3971.46	99.96	0.83333	0.0001	0.83323
24	3554.14	89.46	0.01854	0.00012	0.01842					24	3964.74	99.79	0.83333	0.00011	0.83322
25	3698.7	93.1	0.01568	0.00012	0.01556					25	3972.67	99.99	0.83333	0.00011	0.83322
26	3824.64	96.27	0.01506	0.00013	0.01493					26	3959.42	99.66	0.83333	0.00013	0.8332
27	3765.96	94.79	0.01512	0.00012	0.015					27	3912.89	98.49	0.83333	0.00011	0.83322
28	3666.57	92.29	0.01906	0.0001	0.01896					28	3972.5	99.99	0.83333	0.00014	0.83319
29	3566.22	89.76	0.01951	0.00011	0.0194					29	3973	100	0.83333	0.00012	0.83321
30	3823.52	96.24	0.01724	0.00013	0.01711					30	3968.36	99.88	0.83333	0.00011	0.83322
31	3903.34	98.25	0.0161	0.00011	0.01599					31	3972.35	99.98	0.83333	0.0001	0.83323
32	3776.6	95.06	0.01453	0.0001	0.01443					32	3973	100	0.83333	0.0001	0.83323
33	3473.14	87.42	0.01753	0.00011	0.01742					33	3969.76	99.92	0.83333	0.00012	0.83321
34	3674.94	92.5	0.01665	0.00011	0.01654					34	3972.35	99.98	0.83333	0.00011	0.83322
35	3694.92	93	0.01739	0.00011	0.01728					35	3972.5	99.99	0.83333	0.00011	0.83322
36	3416.35	85.99	0.01652	0.00013	0.01639					36	3967.84	99.87	0.83333	0.0001	0.83323
37	3767.57	94.83	0.01939	0.00012	0.01927					37	3969.39	99.91	0.83333	0.00012	0.83321
38	3715.01	93.51	0.01697	0.00014	0.01683					38	3971.98	99.97	0.83333	0.00013	0.8332
39	3613.66	90.96	0.0179	0.0001	0.0178					39	3972.5	99.99	0.83333	0.0001	0.83323
40	3749.51	94.37	0.01751	0.00011	0.0174					40	3967.18	99.85	0.83333	0.00011	0.83322
41	3529.68	88.84	0.02058	0.00011	0.02047					41	3973	100	0.83333	0.00012	0.83321
42	3557.09	89.53	0.01812	0.00012	0.018					42	3968.88	99.9	0.83333	0.00013	0.8332
43	3686.58	92.79	0.01901	0.0001	0.01891					43	3972.35	99.98	0.83333	0.00012	0.83321
44	3717.1	93.56	0.01659	0.00012	0.01647					44	3961.07	99.7	0.83333	0.00012	0.83321
45	3301.89	83.11	0.0218	0.00014	0.02166					45	3972.35	99.98	0.83333	0.00011	0.83322
46	3716.59	93.55	0.01853	0.00013	0.0184					46	3972.67	99.99	0.83333	0.0001	0.83323
47	3707.98	93.33	0.01765	0.00011	0.01754					47	3972.35	99.98	0.83333	0.00011	0.83322
48	3538.53	89.06	0.01829	0.00015	0.01814					48	3937.34	99.1	0.83333	0.00011	0.83322
49	3851.93	96.95	0.0179	0.0001	0.0178					49	3958.78	99.64	0.83333	0.00011	0.83322
50	3453.8	86.93	0.01942	0.00015	0.01927					50	3971.46	99.96	0.83333	0.00012	0.83321
51	3730.41	93.89	0.01951	0.00011	0.0194					51	3966.53	99.84	0.83333	0.0001	0.83323
52	3630.37	91.38	0.01698	0.00011	0.01687					52	3973	100	0.83333	0.00013	0.8332
53	3628.31	91.32	0.01816	0.00015	0.01801					53	3973.01	100	0.83333	0.00011	0.83322
54	3789.52	95.38	0.01649	0.00012	0.01637					54	3968.36	99.88	0.83333	0.00012	0.83321
55	3773.65	94.98	0.01879	0.00012	0.01867					55	3972.5	99.99	0.83333	0.00013	0.8332
56	3482.02	87.64	0.01704	0.00011	0.01693					56	3972.35	99.98	0.83333	0.00011	0.83322
57	3597.59	90.55	0.02016	0.00011	0.02005					57	3939.71	99.16	0.83333	0.0001	0.83323
58	3795.28	95.53	0.0179	0.0001	0.0178					58	3970.41	99.93	0.83333	0.00011	0.83322
59	3754.75	94.51	0.01842	0.00013	0.01829					59	3964.92	99.8	0.83333	0.00012	0.83321
60	3612.52	90.93	0.01835	0.00013	0.01822					60	3972.35	99.98	0.83333	0.00013	0.8332
61	3668.62	92.34	0.01599	0.00011	0.01588					61	3947.79	99.37	0.83333	0.0001	0.83323
62	3563.81	89.7	0.01994	0.00015	0.01979					62	3972.35	99.98	0.83333	0.00012	0.83321
63	3830.9	96.42	0.01842	0.00011	0.01831					63	3972.03	99.98	0.83333	0.00014	0.83319
64	3750.19	94.39	0.01887	0.00012	0.01875					64	3949.75	99.41	0.83333	0.00013	0.8332
65	3757.91	94.59	0.01587	0.00011	0.01576					65	3972.67	99.99	0.83333	0.00012	0.83321
66	3599.16	90.59	0.01827	0.00015	0.01812					66	3961.04	99.7	0.83333	0.00011	0.83322
67	3766.22	94.8	0.01671	0.00011	0.0166					67	3971.06	99.95	0.83333	0.00012	0.83321
68	3304.18	83.17	0.01951	0.00014	0.01937					68	3920.64	98.68	0.83333	0.00011	0.83322
69	3549.12	89.33	0.01779	0.00013	0.01766					69	3955.55	99.56	0.83333	0.00014	0.83319
70	3669.54	92.36	0.01563	0.00014	0.01549					70	3932.92	98.99	0.83333	0.00013	0.8332
71	3263.01	82.13	0.01864	0.00016	0.01848					71	3969.12	99.9	0.83333	0.0001	0.83323
72	3764.62	94.75	0.01543	0.0001	0.01533					72	3973	100	0.83333	0.00013	0.8332
73	3583.86	90.21	0.01544	0.0001	0.01534					73	3929.05	98.89	0.83333	0.0001	0.83323
74	3773.24	94.97	0.01869	0.00012	0.01857					74	3967.5	99.86	0.83333	0.00013	0.8332
75	3565.93	89.75	0.01648	0.00014	0.01634					75	3965.26	99.8	0.83333	0.00012	0.83321
76	3790.1	95.4	0.01684	9e-05	0.01675					76	3969.12	99.9	0.83333	9e-05	0.83324
77	3687.24	92.81	0.01914	0.00013	0.01901					77	3971.98	99.97	0.83333	0.00014	0.83319
78	3798.3	95.6	0.01815	0.00012	0.01803					78	3971.98	99.97	0.83333	0.00012	0.83321
79	3603.15	90.69	0.01756	0.00013	0.01743					79	3972.35	99.98	0.83333	0.0001	0.83323
80	3513.92	88.44	0.02018	0.00015	0.02003					80	3972.67	99.99	0.83333	0.00011	0.83322
81	3635.07	91.49	0.01795	0.0001	0.01785					81	3972.35	99.98	0.83333	0.00011	0.83322
82	3689.45	92.86	0.02022	0.00012	0.0201					82	3901.25	98.19	0.83333	0.0001	0.83323
83	3387.57	85.26	0.0212	0.00015	0.02105					83	3956.51	99.58	0.83333	0.00012	0.83321
84	3804.05	95.75	0.01566	0.00011	0.01555					84	3961.68	99.71	0.83333	0.00011	0.83322
85	3610.43	90.87	0.01645	0.00015	0.0163					85	3972.5	99.99	0.83333	0.00011	0.83322
86	3560.03	89.61	0.01794	0.00013	0.01781					86	3973	100	0.83333	0.00012	0.83321
87	3904.77	98.28	0.01848	0.0001	0.01838					87	3970.41	99.93	0.83333	0.00013	0.8332
88	3749.67	94.38	0.01734	0.00011	0.01723					88	3967.18	99.85	0.83333	0.00011	0.83322
89	3881.63	97.7	0.01643	0.00011	0.01632					89	3956.47	99.58	0.83333	0.00012	0.83321
90	3765.7	94.78	0.01615	0.00012	0.01603					90	3968.36	99.88	0.83333	0.0001	0.83323
91	3653.16	91.95	0.01595	0.00011	0.01584					91	3972.35	99.98	0.83333	0.00011	0.83322
92	3597.72	90.55	0.0192	0.00013	0.01907					92	3968.47	99.89	0.83333	0.00013	0.8332
93	3831.57	96.44	0.01477	0.00012	0.01465					93	3972.35	99.98	0.83333	0.00012	0.83321
94	3654.64	91.99	0.01813	0.00014	0.01799					94	3790.41	95.4	0.83333	9e-05	0.83324
95	3776.66	95.06	0.01853	0.00013	0.0184					95	3972.67	99.99	0.83333	0.0001	0.83323
96	3580.84	90.13	0.01841	0.00012	0.01829					96	3973	100	0.83333	0.00013	0.8332
97	3293.16	82.89	0.02113	0.00013	0.021					97	3973	100	0.83333	0.00012	0.83321
98	3704.24	93.24	0.01785	0.00011	0.01774					98	3876.05	97.56	0.83333	9e-05	0.83324
99	3843.24	96.73	0.01744	0.00012	0.01732					99	3972.03	99.98	0.83333	0.00012	0.83321
100	3342.02	84.12	0.01997	0.00013	0.01984					100	3973	100	0.83333	0.00011	0.83322
101	3696.61	93.04	0.0167	0.00014	0.01656					101	3968.47	99.89	0.83333	0.00013	0.8332
102	3593.45	90.45	0.01525	0.00011	0.01514					102	3971.46	99.96	0.83333	0.00012	0.83321
103	3705.07	93.26	0.01877	0.00012	0.01865					103	3961.36	99.71	0.83333	0.00012	0.83321
104	3937.86	99.12	0.01467	0.00011	0.01456					104	3963.71	99.77	0.83333	0.00011	0.83322
105	3707.22	93.31	0.01637	0.00013	0.01624					105	3970.95	99.95	0.83333	0.00011	0.83322
106	3523.14	88.68	0.01987	0.00011	0.01976					106	3972.35	99.98	0.83333	0.00012	0.83321
107	3845.78	96.8	0.01786	0.0001	0.01776					107	3970.41	99.93	0.83333	0.00012	0.83321
108	3662.76	92.19	0.01705	0.00013	0.01692					108	3939.71	99.16	0.83333	0.0001	0.83323
109	3517.01	88.52	0.01705	0.00014	0.01691					109	3972.03	99.98	0.83333	0.00011	0.83322
110	3653.87	91.97	0.01715	0.00012	0.01703					110	3966.86	99.85	0.83333	0.00013	0.8332
111	3650.18	91.87	0.01842	0.00011	0.01831					111	3972.67	99.99	0.83333	0.00012	0.83321
112	3781.09	95.17	0.01643	0.00013	0.0163					112	3949.73	99.41	0.83333	0.00011	0.83322
113	3876.3	97.57	0.01871	0.00011	0.0186					113	3970.41	99.93	0.83333	0.0001	0.83323
114	3811.59	95.94	0.01731	0.00012	0.01719					114	3973.01	100	0.83333	0.0001	0.83323
115	3563.04	89.68	0.01654	0.00013	0.01641					115	3949.41	99.41	0.83333	0.00011	0.83322
116	3358.15	84.52	0.01721	0.00011	0.0171					116	3972.5	99.99	0.83333	0.00014	0.83319
117	3365.89	84.72	0.01785	0.00015	0.0177					117	3926.46	98.83	0.83333	0.00011	0.83322
118	3636.23	91.52	0.02077	0.00012	0.02065					118	3973	100	0.83333	0.00013	0.8332
119	3737.11	94.06	0.01825	0.00012	0.01813					119	3972.35	99.98	0.83333	0.0001	0.83323
120	3605.89	90.76	0.01705	0.00013	0.01692					120	3971.46	99.96	0.83333	0.00011	0.83322
121	3644.72	91.74	0.01627	0.00013	0.01614					121	3963.3	99.76	0.83333	0.0001	0.83323
122	3523.72	88.69	0.02144	0.00012	0.02132					122	3968.36	99.88	0.83333	0.00012	0.83321
123	3776.09	95.04	0.01796	0.00012	0.01784					123	3972.67	99.99	0.83333	0.00015	0.83318
124	3445.08	86.71	0.01881	0.0001	0.01871					124	3972.03	99.98	0.83333	0.00012	0.83321
125	3476.35	87.5	0.01948	0.00012	0.01936					125	3972.67	99.99	0.83333	0.00012	0.83321
126	3542.34	89.16	0.01498	0.00011	0.01487					126	3970.41	99.93	0.83333	0.00011	0.83322
127	3500.79	88.11	0.01776	0.00012	0.01764					127	3970.73	99.94	0.83333	0.00012	0.83321
128	3804.99	95.77	0.01684	0.00011	0.01673					128	3970.73	99.94	0.83333	0.00011	0.83322
129	3568.72	89.82	0.0182	0.00011	0.01809					129	3968.36	99.88	0.83333	0.00013	0.8332
130	3580.12	90.11	0.01862	0.00014	0.01848					130	3973.01	100	0.83333	0.00011	0.83322
131	3649.35	91.85	0.01559	0.00011	0.01548					131	3961.36	99.71	0.83333	0.00013	0.8332
132	3893.12	97.99	0.01781	0.00012	0.01769					132	3963.19	99.75	0.83333	0.00013	0.8332
133	3498.24	88.05	0.01684	0.00013	0.01671					133	3805.6	95.79	0.83333	0.0001	0.83323
134	3594.89	90.48	0.01641	0.0001	0.01631					134	3972.5	99.99	0.83333	0.00011	0.83322
135	3831.23	96.43	0.0167	0.00012	0.01658					135	3903.84	98.26	0.83333	0.00014	0.83319
136	3467.82	87.28	0.01862	0.00015	0.01847					136	3968.88	99.9	0.83333	0.00011	0.83322
137	3558.32	89.56	0.01807	0.00013	0.01794					137	3972.67	99.99	0.83333	0.00011	0.83322
138	3389.82	85.32	0.02152	0.00016	0.02136					138	3931.75	98.96	0.83333	0.00012	0.83321
139	3609.5	90.85	0.01811	0.00013	0.01798					139	3972.67	99.99	0.83333	0.00014	0.83319
140	3510.27	88.35	0.02246	0.00012	0.02234					140	3970.73	99.94	0.83333	0.00013	0.8332
141	3500.03	88.1	0.02054	0.0001	0.02044					141	3972.03	99.98	0.83333	0.00011	0.83322
142	3406.53	85.74	0.01863	0.00012	0.01851					142	3973	100	0.83333	0.00012	0.83321
143	3537.81	89.05	0.01795	0.00014	0.01781					143	3972.67	99.99	0.83333	0.00011	0.83322
144	3631.23	91.4	0.01771	0.00015	0.01756					144	3971.46	99.96	0.83333	0.00011	0.83322
145	3546.35	89.26	0.0183	0.00014	0.01816					145	3951.34	99.45	0.83333	0.0001	0.83323
146	3571.63	89.9	0.017	0.0001	0.0169					146	3972.67	99.99	0.83333	0.00013	0.8332
147	3653.7	91.96	0.01627	0.00011	0.01616					147	3971.98	99.97	0.83333	0.00014	0.83319
148	3613.59	90.95	0.01601	0.0001	0.01591					148	3958.13	99.63	0.83333	0.00013	0.8332
149	3649.33	91.85	0.01727	0.0001	0.01717					149	3875.4	97.54	0.83333	0.0001	0.83323
150	3801.89	95.69	0.0182	0.00013	0.01807					150	3972.35	99.98	0.83333	0.00011	0.83322
151	3660.16	92.13	0.01802	0.00011	0.01791					151	3967.5	99.86	0.83333	0.0001	0.83323
152	3717.6	93.57	0.01613	0.00013	0.016					152	3972.67	99.99	0.83333	0.00012	0.83321
153	3818.95	96.12	0.01595	0.00014	0.01581					153	3972.67	99.99	0.83333	0.00011	0.83322
154	3525.62	88.74	0.01656	0.0001	0.01646					154	3972.35	99.98	0.83333	0.00012	0.83321
155	3505.25	88.23	0.01893	0.0001	0.01883					155	3970.73	99.94	0.83333	0.00012	0.83321
156	3670.33	92.38	0.01775	0.0001	0.01765					156	3972.67	99.99	0.83333	9e-05	0.83324
157	3550.34	89.36	0.01699	0.00012	0.01687					157	3967.18	99.85	0.83333	0.00011	0.83322
158	3877.3	97.59	0.0138	0.00011	0.01369					158	3971.06	99.95	0.83333	0.00012	0.83321
159	3523.94	88.7	0.02103	0.00011	0.02092					159	3967.18	99.85	0.83333	0.00012	0.83321
160	3751.4	94.42	0.01509	9e-05	0.015					160	3946.65	99.34	0.83333	0.00013	0.8332
161	3567.35	89.79	0.01827	0.00013	0.01814					161	3972.35	99.98	0.83333	0.00011	0.83322
162	3531.26	88.88	0.01737	0.00013	0.01724					162	3972.5	99.99	0.83333	0.00012	0.83321
163	3706.76	93.3	0.01949	0.0001	0.01939					163	3973	100	0.83333	0.00013	0.8332
164	3308.75	83.28	0.02173	0.00014	0.02159					164	3933.89	99.02	0.83333	0.00012	0.83321
165	3660.93	92.14	0.01574	0.00014	0.0156					165	3973.01	100	0.83333	0.00013	0.8332
166	3710.38	93.39	0.01559	0.00011	0.01548					166	3911.49	98.45	0.83333	0.00012	0.83321
167	3670.69	92.39	0.0165	0.00012	0.01638					167	3972.5	99.99	0.83333	0.00011	0.83322
168	3601.3	90.64	0.01733	0.00014	0.01719					168	3964.92	99.8	0.83333	0.00012	0.83321
169	3496.99	88.02	0.01955	0.00016	0.01939					169	3964.92	99.8	0.83333	0.00013	0.8332
170	3581.08	90.14	0.01717	0.00011	0.01706					170	3972.67	99.99	0.83333	0.00013	0.8332
171	3707.52	93.32	0.0142	0.00012	0.01408					171	3966.21	99.83	0.83333	0.00013	0.8332
172	3809.01	95.87	0.0167	0.00011	0.01659					172	3968.8	99.89	0.83333	0.00011	0.83322
173	3912.59	98.48	0.01496	9e-05	0.01487					173	3973	100	0.83333	0.00011	0.83322
174	3627.32	91.3	0.01673	0.00013	0.0166					174	3972.5	99.99	0.83333	0.0001	0.83323
175	3556.11	89.51	0.01641	0.00011	0.0163					175	3972.03	99.98	0.83333	0.0001	0.83323
176	3798.9	95.62	0.01718	0.00012	0.01706					176	3950.27	99.43	0.83333	0.0001	0.83323
177	3815.33	96.03	0.01468	0.00012	0.01456					177	3972.5	99.99	0.83333	0.00012	0.83321
178	3693.41	92.96	0.01588	0.0001	0.01578					178	3969.12	99.9	0.83333	0.00014	0.83319
179	3561.03	89.63	0.0157	0.00011	0.01559					179	3973.01	100	0.83333	0.00012	0.83321
180	3766.09	94.79	0.01763	0.00012	0.01751					180	3955.87	99.57	0.83333	9e-05	0.83324
181	3666.33	92.28	0.01694	0.00012	0.01682					181	3968.88	99.9	0.83333	0.00012	0.83321
182	3505.12	88.22	0.0186	0.00012	0.01848					182	3966.86	99.85	0.83333	0.0001	0.83323
183	3706.95	93.3	0.01668	0.00012	0.01656					183	3972.67	99.99	0.83333	0.00013	0.8332
184	3623.91	91.21	0.01652	0.00012	0.0164					184	3933.89	99.02	0.83333	0.0001	0.83323
185	3747.48	94.32	0.01825	0.00012	0.01813					185	3968.88	99.9	0.83333	0.0001	0.83323
186	3441.32	86.62	0.0176	0.00013	0.01747					186	3971.38	99.96	0.83333	0.00012	0.83321
187	3568.36	89.81	0.01728	0.00011	0.01717					187	3972.35	99.98	0.83333	0.00012	0.83321
188	3524.36	88.71	0.01905	0.00011	0.01894					188	3964.22	99.78	0.83333	0.0001	0.83323
189	3578.1	90.06	0.0172	0.00013	0.01707					189	3964.92	99.8	0.83333	0.00012	0.83321
190	3619.5	91.1	0.01716	0.00012	0.01704					190	3973	100	0.83333	0.00012	0.83321
191	3585.69	90.25	0.0176	0.00011	0.01749					191	3972.35	99.98	0.78984	0.0001	0.78974
192	3667.48	92.31	0.01847	0.00014	0.01833					192	3958.78	99.64	0.83333	0.0001	0.83323
193	3456.48	87	0.02345	0.00012	0.02333					193	3973	100	0.83333	0.00013	0.8332
194	3525.17	88.73	0.01902	0.00014	0.01888					194	3972.67	99.99	0.83333	0.00012	0.83321
195	3372.97	84.9	0.02174	0.00017	0.02157					195	3959.05	99.65	0.83333	0.00014	0.83319
196	3762.6	94.7	0.01584	0.00011	0.01573					196	3970.73	99.94	0.83333	0.00011	0.83322
197	3562.8	89.68	0.01562	0.00011	0.01551					197	3967.18	99.85	0.83333	9e-05	0.83324
198	3383.78	85.17	0.01899	0.00013	0.01886					198	3937.77	99.11	0.83333	0.00011	0.83322
199	3535.75	88.99	0.01954	0.00013	0.01941					199	3971.7	99.97	0.83333	0.00011	0.83322
200	3575.79	90	0.02042	0.00011	0.02031					200	3971.46	99.96	0.83333	0.00012	0.83321

[truncated: 1 more sheets: 10_BWACO_Seeds(25)]
