# Supplementary material for: Enhanced Hyper-Cube Framework Aco for Combinatorial Optimization Problems
Source: Preprints.org preprint supplement (doi:10.20944/preprints202108.0573.v1), 2021-08-31
Supplement: Supplementary file 14 [file 07_EHCFACO_@_Seeds(75)_Exp.xlsx]

## Sheet: 07_EHCFACO_@_Seeds(75)_Fast
Slow Convergence										Slow Convergenece
ige	Fbest(ige)	Fworst(ige)	Fmean(ige)	BWLocalDis	GlobalDis	Segma	MaxTau	MinTau		Expeirement no.(Iexp) =	9
1	3543.83	2068.31	2736.81	11	9	1	0.0092	0.0092		Seeds =	75
2	3565.22	1649.68	2858.97	10	6	1	0.0142	0.0092		Number of variables =	16
3	3586.64	2251.37	2968	10	6	1	0.019	0.014		no. of Ants =	25
4	3884.61	2411.62	3189.52	10	6	1	0.0239	0.0189		Maximum CBLF(fopt) =	3973.01
5	3905.89	2374.78	3176	8	4	1	0.0288	0.0238		Optimal Solution(xopt) =	333332322222223
6	3905.89	2505.38	3351.45	6	4	1	0.0335	0.0285		Number of Practical Optima =	1
7	3915.59	3183.31	3630.19	8	6	1	0.0378	0.0328		no. of Iterations(ige) =	27
8	3915.59	2510.19	3387.95	10	6	1	0.0424	0.0374		1st Global optima Found @ ige =	17
9	3915.59	2992	3540.91	6	6	2	0.0512	0.0462		Minimum Best Solution =	3543.83
10	3947.16	2740.95	3577.76	7	4	1	0.0557	0.0507		Mean of Best Solution =	3909.45
11	3952.34	2891.99	3528.33	9	4	1	0.0601	0.0507		SD of Best Solution =	126.974
12	3954.72	3115.75	3697.46	7	6	1	0.0644	0.0549		Fitness Distance Correlation =	-224.832
13	3962.12	3093.78	3672.75	9	4	1	0.0687	0.0593		Correlation Coefficent =	-0.62459
14	3962.12	3108.39	3669.84	7	4	1	0.073	0.0636		Elapsed Time =	2.3125
15	3962.12	2876.21	3633.65	7	4	1	0.0774	0.0679
16	3972.5	3328.2	3759.16	7	1	1	0.0816	0.0679
17	3973.01	3508.73	3768.91	7	0	1	0.0858	0.0679
18	3973.01	3286.37	3718.51	7	0	1	0.0901	0.0679
19	3973.01	3280.15	3773.6	7	0	1	0.0943	0.0679
20	3973.01	3254.09	3708.83	8	0	1	0.0986	0.0679
21	3973.01	3362.26	3718.27	5	0	1	0.1029	0.0679
22	3973.01	3248.88	3696.29	5	0	1	0.1072	0.0679
23	3973.01	3392.51	3730.36	6	0	1	0.1115	0.0679
24	3973.01	3203.15	3723.78	7	0	1	0.1157	0.0679
25	3973.01	3232.67	3754.96	8	0	1	0.12	0.0679
26	3973.01	3513.09	3772.6	6	0	1	0.1242	0.0679
27	3973.01	3477.5	3757.96	7	0	1	0.1284	0.0679

## Sheet: 07_EHCFACO_@_Seeds(75)_Slow
Slow Convergence										Slow Convergenece
ige	Fbest(ige)	Fworst(ige)	Fmean(ige)	BWLocalDis	GlobalDis	Segma	MaxTau	MinTau		Expeirement no.(Iexp) =	41
1	3430.23	1912.99	2647.73	12	7	1	0.0092	0.0092		Seeds =	75
2	3723.01	2306.57	2919.52	12	6	1	0.0143	0.0143		Number of variables =	16
3	3804.99	2000.51	2923.44	8	4	1	0.0195	0.0195		no. of Ants =	25
4	3891.91	2442.25	3127.1	10	5	1	0.0245	0.0195		Maximum CBLF(fopt) =	3973.01
5	3895.44	2449.78	3331.08	9	5	1	0.0291	0.0195		Optimal Solution(xopt) =	233332333333333
6	3962.82	3472.46	3713.76	7	5	1	0.0334	0.0238		Number of Practical Optima =	1
7	3962.82	2825.07	3549.72	11	5	1	0.0379	0.0282		no. of Iterations(ige) =	71
8	3962.82	2251.86	3444.24	8	5	1	0.0425	0.0328		1st Global optima Found @ ige =	15
9	3962.82	2555.62	3518.9	8	5	1	0.047	0.0373		Minimum Best Solution =	3430.23
10	3962.82	3250.33	3568.59	6	5	1	0.0514	0.0418		Mean of Best Solution =	3956.03
11	3963.65	2769.25	3564.85	8	5	1	0.0559	0.0418		SD of Best Solution =	73.5134
12	3964.09	3215.56	3701.36	8	6	1	0.0602	0.0461		Fitness Distance Correlation =	-84.504
13	3964.41	2480.1	3552.45	7	3	1	0.0646	0.0505		Correlation Coefficent =	-0.56677
14	3964.41	2787.69	3573.46	9	3	1	0.0691	0.055		Elapsed Time =	5.7368
15	3973.01	3344.36	3822.58	8	0	1	0.0732	0.055
16	3973.01	2869.19	3679.43	6	0	1	0.0775	0.055
17	3973.01	3133.28	3724.15	8	0	1	0.0818	0.055
18	3973.01	3337.37	3732.04	7	0	1	0.0861	0.055
19	3973.01	3428.62	3809.59	3	0	1	0.0902	0.055
20	3973.01	3376.92	3750.35	5	0	1	0.0945	0.055
21	3973.01	3191.65	3658.66	8	0	1	0.0988	0.055
22	3973.01	3432.24	3800.81	4	0	1	0.103	0.055
23	3973.01	3076.11	3711.84	4	0	2	0.1116	0.055
24	3973.01	3428.62	3760.51	5	0	1	0.1158	0.055
25	3973.01	3357.03	3742.4	5	0	1	0.12	0.055
26	3973.01	3429.14	3803.52	2	0	1	0.1242	0.055
27	3973.01	3405.1	3811.05	5	0	1	0.1284	0.055
28	3973.01	3498.18	3815.7	4	0	1	0.1325	0.055
29	3973.01	3587.45	3826.72	5	0	1	0.1367	0.055
30	3973.01	3338.32	3795.79	5	0	1	0.1409	0.055
31	3973.01	3428.62	3743.2	4	0	1	0.1451	0.055
32	3973.01	3429.14	3811.3	2	0	1	0.1493	0.055
33	3973.01	3275.04	3771.55	6	0	1	0.1535	0.055
34	3973.01	3192.01	3748.08	4	0	2	0.162	0.055
35	3973.01	3540.81	3845.15	4	0	1	0.1661	0.055
36	3973.01	3481.05	3840.82	3	0	2	0.1744	0.055
37	3973.01	3416.74	3851.9	4	0	1	0.1785	0.055
38	3973.01	3514.99	3837.39	3	0	1	0.1827	0.055
39	3973.01	3432.76	3830.54	3	0	2	0.191	0.055
40	3973.01	3586.59	3837.77	5	0	3	0.2034	0.055
41	3973.01	3390.24	3761.81	3	0	2	0.2118	0.055
42	3973.01	3406.28	3811.74	3	0	3	0.2243	0.055
43	3973.01	3574.42	3858.39	3	0	2	0.2326	0.055
44	3973.01	3541.32	3876.86	3	0	4	0.249	0.055
45	3973.01	3705.21	3894.97	2	0	1	0.2531	0.055
46	3973.01	3600.26	3875.5	2	0	4	0.2695	0.055
47	3973.01	3364.96	3825.36	4	0	1	0.2736	0.055
48	3973.01	3392.5	3859.2	2	0	3	0.286	0.055
49	3973.01	3500.58	3892.7	3	0	8	0.3186	0.055
50	3973.01	3569.61	3876.11	2	0	6	0.3432	0.055
51	3973.01	3555.24	3857.22	2	0	6	0.368	0.055
52	3973.01	3450.67	3843.91	2	0	5	0.3886	0.055
53	3973.01	3451.31	3890.33	1	0	8	0.4213	0.055
54	3973.01	3600.26	3900.23	1	0	8	0.4539	0.055
55	3973.01	3647.31	3921.06	2	0	12	0.5025	0.055
56	3973.01	3585.33	3932.69	1	0	12	0.551	0.055
57	3973.01	3600.26	3907.84	1	0	9	0.5876	0.055
58	3973.01	3796.87	3935.86	2	0	14	0.6442	0.055
59	3973.01	3466.18	3909.22	2	0	17	0.7133	0.055
60	3973.01	3450.67	3935.11	2	0	14	0.7698	0.055
61	3973.01	3600.26	3931.74	1	0	14	0.8264	0.055
62	3973.01	3599.74	3902.23	2	0	12	0.8753	0.055
63	3973.01	3599.74	3933.46	2	0	16	0.9399	0.055
64	3973.01	3801.89	3957.36	1	0	19	1.0162	0.055
65	3973.01	3451.31	3902.28	1	0	17	1.0854	0.055
66	3973.01	3749.13	3930.56	1	0	11	1.1299	0.055
67	3973.01	3600.26	3943.63	1	0	17	1.1984	0.055
68	3973.01	3769.4	3946.64	1	0	16	1.2629	0.055
69	3973.01	3932.28	3968.41	1	0	20	1.3429	0.055
70	3973.01	3451.31	3937.69	1	0	15	1.4035	0.055
71	3973.01	3749.13	3961.47	1	0	19	1.4797	0.055
