# Supplementary material for: Enhanced Hyper-Cube Framework Aco for Combinatorial Optimization Problems
Source: Preprints.org preprint supplement (doi:10.20944/preprints202108.0573.v1), 2021-08-31
Supplement: Supplementary file 15 [file 07_EHCFACO_Seeds_Results.xlsx]

## Sheet: 00_Index
		Global optimal solution		Relaibility (%)		Normalized Price (iteration)		Correlation Coefficent		Performance rate		Elapsed time (Sec)		Solution Quality
		Fast convergence	Slow Convergence	Fast convergence	Slow Convergence	Fast convergence	Slow Convergence	Fast convergence	Slow Convergence	Fast convergence	Slow Convergence	Fast convergence	Slow Convergence	Fast convergence	Slow Convergence
	Seed (301)	3973.01	3973.01	88	99	29.4773	80.8535	-1	-0.70311	0.033924	0.012368	2.4882	6.4634	99.9633	99.9831
	Seed (2)	3973.01	3973.01	89	99	28.5562	81.2323	-0.70749	-1	0.035019	0.01231	2.0914	6.5645	99.9619	99.9861
	Seed (50)	3973.01	3973.01	90	98.5	28.0889	83.0051	-0.69581	-0.69216	0.035601	0.012047	2.0977	6.768	99.9599	99.9848
	Seed (75)	3973.01	3973.01	82	99	31.5793	81.2576	-0.6944	-0.70317	0.031666	0.012307	2.1899	6.7957	99.9571	99.984
	Seed (111)	3973.01	3973.01	93	98.5	27.7258	82.2792	-0.69339	-0.69396	0.036067	0.012154	2.1173	6.7967	99.9702	99.9828
	Seed (200)	3973.01	3973.01	92.5	98	29.1027	82.1684	-0.6902	-0.68941	0.034361	0.01217	2.1887	6.7421	99.965	99.9833
	Seed (167)	3973.01	3973.01	95	99.5	27.7263	81.191	-0.69327	-0.69944	0.036067	0.012317	2.1521	6.8981	99.962	99.985
	Seed (225)	3973.01	3973.01	88.5	99	29.113	81.3838	-1	-0.69074	0.035186	0.012287	2.0935	7.9533	99.9634	99.9834
	Seed (11)	3973.01	3973.01	88	100	28.4205	80.42	-1	-0.68806	0.035186	0.012435	2.054	7.3293	99.9629	99.985
	Seed (25)	3973.01	3973.01	90	99	29.3833	81.1465	-0.69737	-0.70511	0.034033	0.012323	2.1637	6.3218	99.9642	99.9807
			Fast Convergence						Slow Convergence
			Relaibility (%)	Normalized Price (iteration)	Correlation Coefficent	Performance Rate	Elapsed time (sec)		Relaibility (%)	Normalized Price (iteration)	Correlation Coefficent	Performance Rate	Elapsed time (sec)
		Min.	82	27.7258	-1	0.031666	2.054	Min.	98	80.42	-1	0.012047	6.3218
		Max.	95	31.5793	-0.6902	0.036067	2.4882	Max.	100	83.0051	-0.68806	0.012435	7.9533
		Mean	89.6	28.9173	-0.787193	0.034711	2.16365	Mean	98.95	81.4937	-0.726516	0.0122718	6.86329
		Median	89.5	28.8295	-0.69659	0.0351025	2.1347	Median	99	81.2449	-0.6967	0.0123085	6.78185
		Standrad division	3.37491	1.07663	0.139381	0.00124456	0.116381	Standrad division	0.522015	0.725781	0.0913529	0.000108746	0.445159
			Solution Quality
			Fast Conv.	Slow Conv.
		Min.	99.9571	99.9807
		Max.	99.9702	99.9861
		Mean	99.963	99.9838
		Median	99.9631	99.9837
		Standrad division	0.00322752	0.00143931

## Sheet: 01_EHCFACO_Seeds(301)
Fast Converegnce Exp							Fast Converegnce Exp			Slow Converegnce Exp							Slow Converegnce Exp
#	CBLF	Quality	Taumax	Taumin	DeltaTauminmax		Global Optimal Solution =	3973.01		#	CBLF	Quality	Taumax	Taumin	DeltaTauminmax		Global Optimal Solution =	3973.01
1	3967.99	99.87	0.13266	0.00888	0.12378		Minimum Optimal Solution =	3959.05		1	3972.35	99.98	1.54495	0.00888	1.53607		Minimum Optimal Solution =	3967.5
2	3973.01	100	0.08448	0.00915	0.07533		Mean of Optimal Solution =	3971.55		2	3972.35	99.98	3.22671	0.00954	3.21717		Mean of Optimal Solution =	3972.34
3	3969.58	99.91	0.07303	0.00914	0.06389		Median of Optimal Solution =	3971.55		3	3971.46	99.96	3.17986	0.00935	3.17051		Median of Optimal Solution =	3972.34
4	3973.01	100	0.19798	0.00914	0.18884		Solution Standrad Deviation =	1.9746		4	3972.67	99.99	1.8936	0.00943	1.88417		Solution Standrad Deviation =	0.89093
5	3970.41	99.93	0.13492	0.00927	0.12565		Average Price =	25.94		5	3973	100	2.39739	0.00929	2.3881		Average Price =	80.045
6	3970.73	99.94	0.13249	0.0097	0.12279		Relability =	88		6	3972.67	99.99	0.54305	0.0093	0.53375		Relability =	99
7	3968.88	99.9	0.12702	0.00923	0.11779		Normalized Price =	29.4773		7	3972.35	99.98	3.57924	0.00884	3.5704		Normalized Price =	80.8535
8	3973	100	0.17112	0.00914	0.16198		Average Solution Quality =	99.9633		8	3973.01	100	2.97507	0.00925	2.96582		Average Solution Quality =	99.9831
9	3972.35	99.98	0.14636	0.00917	0.13719		Average FDC =	-137.753		9	3973	100	4.16392	0.00914	4.15478		Average FDC =	-56.2006
10	3969.12	99.9	0.17522	0.00933	0.16589		Correlation Coefficent =	-1		10	3972.67	99.99	2.97495	0.00919	2.96576		Correlation Coefficent =	-0.70311
11	3972.5	99.99	0.16659	0.00908	0.15751		Solution Robustness =	2011.37		11	3972.35	99.98	1.62775	0.00881	1.61894		Solution Robustness =	4458.62
12	3972.67	99.99	0.147	0.00954	0.13746		Performance Rate =	0.033924		12	3973.01	100	2.54168	0.0096	2.53208		Performance Rate =	0.012368
13	3973	100	0.11835	0.00937	0.10898		Average Elapsed Time =	2.4882		13	3972.67	99.99	3.83622	0.00989	3.82633		Average Elapsed Time =	6.4634
14	3973.01	100	0.23236	0.00967	0.22269					14	3973.01	100	2.87761	0.00926	2.86835
15	3973.01	100	0.12775	0.00935	0.1184					15	3972.67	99.99	1.69469	0.00926	1.68543
16	3971.98	99.97	0.26297	0.00908	0.25389					16	3972.5	99.99	0.80603	0.00913	0.7969
17	3968.88	99.9	0.1417	0.00974	0.13196					17	3972.35	99.98	2.60877	0.00917	2.5996
18	3973	100	0.25571	0.00948	0.24623					18	3973.01	100	0.81015	0.00918	0.80097
19	3970.95	99.95	0.09492	0.0099	0.08502					19	3971.46	99.96	3.10446	0.00949	3.09497
20	3968.8	99.89	0.15371	0.00906	0.14465					20	3973.01	100	3.04911	0.00916	3.03995
21	3972.35	99.98	0.14755	0.00932	0.13823					21	3972.5	99.99	3.30004	0.00949	3.29055
22	3972.35	99.98	0.2386	0.00912	0.22948					22	3972.5	99.99	3.97606	0.00982	3.96624
23	3972.67	99.99	0.08112	0.00963	0.07149					23	3972.35	99.98	1.31741	0.00955	1.30786
24	3970.73	99.94	0.25194	0.00908	0.24286					24	3972.67	99.99	1.84411	0.0091	1.83501
25	3973	100	0.18961	0.00895	0.18066					25	3972.35	99.98	1.46097	0.00963	1.45134
26	3970.73	99.94	0.12338	0.00927	0.11411					26	3971.98	99.97	3.66128	0.00888	3.6524
27	3972.67	99.99	0.10669	0.00922	0.09747					27	3973	100	1.63141	0.00915	1.62226
28	3972.67	99.99	0.16516	0.00958	0.15558					28	3972.67	99.99	1.18424	0.00922	1.17502
29	3970.73	99.94	0.115	0.00937	0.10563					29	3972.67	99.99	1.57497	0.004	1.57097
30	3973.01	100	0.09277	0.00925	0.08352					30	3973	100	2.07751	0.0095	2.06801
31	3972.35	99.98	0.09706	0.00923	0.08783					31	3972.67	99.99	3.00458	0.00934	2.99524
32	3972.5	99.99	0.13162	0.00897	0.12265					32	3971.46	99.96	1.36531	0.00914	1.35617
33	3973.01	100	0.09376	0.00919	0.08457					33	3972.67	99.99	0.93417	0.00939	0.92478
34	3972.5	99.99	0.11019	0.0092	0.10099					34	3973.01	100	3.13736	0.00902	3.12834
35	3972.35	99.98	0.09799	0.00893	0.08906					35	3973.01	100	2.61815	0.00918	2.60897
36	3973	100	0.22959	0.0096	0.21999					36	3972.35	99.98	3.90291	0.00965	3.89326
37	3970.09	99.93	0.09297	0.00949	0.08348					37	3969.12	99.9	3.15452	0.00931	3.14521
38	3972.67	99.99	0.25223	0.00929	0.24294					38	3972.35	99.98	2.4399	0.00921	2.43069
39	3971.98	99.97	0.17941	0.0094	0.17001					39	3973.01	100	2.81789	0.00927	2.80862
40	3972.35	99.98	0.23908	0.00884	0.23024					40	3973.01	100	1.8903	0.00922	1.88108
41	3972.35	99.98	0.09454	0.00882	0.08572					41	3970.73	99.94	3.07472	0.00914	3.06558
42	3964.59	99.79	0.11161	0.00934	0.10227					42	3971.46	99.96	2.96663	0.004	2.96263
43	3970.73	99.94	0.17359	0.00922	0.16437					43	3972.67	99.99	2.97035	0.00924	2.96111
44	3972.35	99.98	0.1306	0.00906	0.12154					44	3972.35	99.98	4.40332	0.0095	4.39382
45	3972.03	99.98	0.18714	0.00914	0.178					45	3973	100	3.68211	0.00932	3.67279
46	3973	100	0.11945	0.00909	0.11036					46	3973	100	3.85118	0.0092	3.84198
47	3968.47	99.89	0.1362	0.00911	0.12709					47	3972.67	99.99	2.90278	0.00925	2.89353
48	3970.41	99.93	0.10681	0.00934	0.09747					48	3972.67	99.99	1.70142	0.00934	1.69208
49	3972.67	99.99	0.13922	0.00943	0.12979					49	3971.98	99.97	3.09438	0.00902	3.08536
50	3972.35	99.98	0.06771	0.00915	0.05856					50	3972.03	99.98	1.79589	0.00911	1.78678
51	3972.67	99.99	0.14035	0.00935	0.131					51	3971.46	99.96	3.23191	0.00921	3.2227
52	3968.88	99.9	0.25431	0.00888	0.24543					52	3970.41	99.93	3.36267	0.00922	3.35345
53	3970.09	99.93	0.16216	0.00908	0.15308					53	3971.46	99.96	2.25068	0.00914	2.24154
54	3972.67	99.99	0.13537	0.00885	0.12652					54	3973	100	3.88103	0.00947	3.87156
55	3967.5	99.86	0.08868	0.0092	0.07948					55	3972.67	99.99	2.833	0.00924	2.82376
56	3972.67	99.99	0.13506	0.00911	0.12595					56	3973.01	100	3.56798	0.00942	3.55856
57	3973	100	0.106	0.00949	0.09651					57	3973	100	2.88919	0.00909	2.8801
58	3972.67	99.99	0.24522	0.00923	0.23599					58	3970.41	99.93	3.18279	0.00911	3.17368
59	3972.03	99.98	0.12083	0.00928	0.11155					59	3973	100	1.13628	0.00918	1.1271
60	3968.36	99.88	0.10092	0.00942	0.0915					60	3972.67	99.99	2.88544	0.00976	2.87568
61	3968.36	99.88	0.10152	0.00927	0.09225					61	3972.67	99.99	1.94312	0.00928	1.93384
62	3970.41	99.93	0.20774	0.00923	0.19851					62	3972.67	99.99	3.72867	0.00913	3.71954
63	3969.39	99.91	0.18836	0.00948	0.17888					63	3971.98	99.97	3.58565	0.00945	3.5762
64	3972.67	99.99	0.14932	0.00916	0.14016					64	3972.67	99.99	3.55263	0.00932	3.54331
65	3971.98	99.97	0.15403	0.00898	0.14505					65	3971.98	99.97	3.55211	0.00908	3.54303
66	3972.67	99.99	0.07656	0.00938	0.06718					66	3973.01	100	3.77615	0.00939	3.76676
67	3972.67	99.99	0.20694	0.00906	0.19788					67	3972.35	99.98	1.67283	0.00918	1.66365
68	3973	100	0.14392	0.00944	0.13448					68	3972.5	99.99	3.28124	0.00947	3.27177
69	3972.67	99.99	0.102	0.00948	0.09252					69	3972.5	99.99	2.95092	0.00935	2.94157
70	3966.53	99.84	0.07711	0.00958	0.06753					70	3973	100	3.29415	0.00934	3.28481
71	3973	100	0.22192	0.00916	0.21276					71	3972.03	99.98	1.00874	0.00923	0.99951
72	3972.67	99.99	0.1682	0.00919	0.15901					72	3971.06	99.95	3.93887	0.0092	3.92967
73	3971.06	99.95	0.19007	0.00926	0.18081					73	3972.5	99.99	1.7306	0.00932	1.72128
74	3968.88	99.9	0.13129	0.00949	0.1218					74	3971.98	99.97	1.57856	0.00933	1.56923
75	3972.67	99.99	0.14233	0.00953	0.1328					75	3973.01	100	2.05725	0.00973	2.04752
76	3972.67	99.99	0.19866	0.00932	0.18934					76	3973	100	3.254	0.00927	3.24473
77	3971.98	99.97	0.15148	0.0094	0.14208					77	3971.46	99.96	2.45834	0.00912	2.44922
78	3972.67	99.99	0.14293	0.00905	0.13388					78	3973	100	2.68115	0.00926	2.67189
79	3963.19	99.75	0.13814	0.00884	0.1293					79	3973	100	4.2232	0.00907	4.21413
80	3972.5	99.99	0.13046	0.00965	0.12081					80	3972.67	99.99	2.80376	0.00903	2.79473
81	3972.35	99.98	0.18308	0.00897	0.17411					81	3972.67	99.99	3.57144	0.00922	3.56222
82	3971.98	99.97	0.09005	0.00966	0.08039					82	3973.01	100	4.34589	0.00923	4.33666
83	3973	100	0.19101	0.00927	0.18174					83	3973	100	2.91188	0.00933	2.90255
84	3972.67	99.99	0.16985	0.00929	0.16056					84	3973	100	2.65479	0.00924	2.64555
85	3973	100	0.16722	0.0094	0.15782					85	3973.01	100	3.05454	0.00954	3.045
86	3972.67	99.99	0.17712	0.00943	0.16769					86	3973	100	2.27937	0.00926	2.27011
87	3972.67	99.99	0.08906	0.00943	0.07963					87	3972.5	99.99	1.47605	0.00947	1.46658
88	3970.09	99.93	0.13593	0.00916	0.12677					88	3971.46	99.96	2.05213	0.00924	2.04289
89	3971.98	99.97	0.36831	0.00954	0.35877					89	3972.35	99.98	2.4285	0.0089	2.4196
90	3972.35	99.98	0.12748	0.00924	0.11824					90	3972.5	99.99	2.10878	0.00947	2.09931
91	3973	100	0.11627	0.00907	0.1072					91	3972.35	99.98	2.03624	0.00949	2.02675
92	3972.67	99.99	0.12774	0.00906	0.11868					92	3973.01	100	3.57844	0.00945	3.56899
93	3972.67	99.99	0.08857	0.00927	0.0793					93	3972.5	99.99	2.4467	0.00939	2.43731
94	3972.35	99.98	0.21646	0.00887	0.20759					94	3972.5	99.99	1.92338	0.00911	1.91427
95	3971.46	99.96	0.22976	0.00926	0.2205					95	3972.67	99.99	2.86047	0.00933	2.85114
96	3972.5	99.99	0.18594	0.00944	0.1765					96	3973.01	100	1.91691	0.00906	1.90785
97	3972.5	99.99	0.14815	0.00924	0.13891					97	3972.5	99.99	3.93096	0.00925	3.92171
98	3971.46	99.96	0.12496	0.00919	0.11577					98	3972.67	99.99	3.67798	0.0094	3.66858
99	3971.85	99.97	0.08913	0.0095	0.07963					99	3971.06	99.95	3.42664	0.00938	3.41726
100	3968.82	99.89	0.09315	0.00879	0.08436					100	3973.01	100	3.13417	0.00924	3.12493
101	3971.52	99.96	0.14103	0.00933	0.1317					101	3972.35	99.98	2.03507	0.00947	2.0256
102	3971.98	99.97	0.08581	0.00921	0.0766					102	3973.01	100	2.55113	0.00917	2.54196
103	3971.06	99.95	0.10585	0.00924	0.09661					103	3972.5	99.99	2.45937	0.0093	2.45007
104	3973.01	100	0.22643	0.00943	0.217					104	3972.35	99.98	2.15043	0.00925	2.14118
105	3969.39	99.91	0.0891	0.00903	0.08007					105	3969.12	99.9	3.9826	0.00939	3.97321
106	3972.67	99.99	0.2977	0.00948	0.28822					106	3972.35	99.98	3.10681	0.009	3.09781
107	3972.35	99.98	0.14371	0.00901	0.1347					107	3970.73	99.94	3.59566	0.00939	3.58627
108	3972.35	99.98	0.07662	0.009	0.06762					108	3972.5	99.99	2.38802	0.00959	2.37843
109	3973.01	100	0.10501	0.00943	0.09558					109	3967.5	99.86	3.1613	0.00939	3.15191
110	3972.35	99.98	0.12775	0.00921	0.11854					110	3973.01	100	1.55922	0.00927	1.54995
111	3972.67	99.99	0.11776	0.00954	0.10822					111	3973.01	100	0.77694	0.00906	0.76788
112	3971.46	99.96	0.13065	0.00942	0.12123					112	3972.67	99.99	2.98489	0.00932	2.97557
113	3973	100	0.09807	0.00925	0.08882					113	3971.98	99.97	4.02375	0.00961	4.01414
114	3972.03	99.98	0.1925	0.00928	0.18322					114	3972.5	99.99	2.04228	0.00957	2.03271
115	3973	100	0.14523	0.00968	0.13555					115	3973.01	100	3.16383	0.00912	3.15471
116	3972.67	99.99	0.09355	0.0092	0.08435					116	3972.5	99.99	2.44896	0.00969	2.43927
117	3973	100	0.18858	0.00895	0.17963					117	3971.98	99.97	2.31173	0.009	2.30273
118	3972.35	99.98	0.16451	0.00929	0.15522					118	3973.01	100	2.75944	0.004	2.75544
119	3972.67	99.99	0.131	0.00913	0.12187					119	3971.46	99.96	1.7513	0.00919	1.74211
120	3972.35	99.98	0.09797	0.0089	0.08907					120	3972.67	99.99	3.217	0.00952	3.20748
121	3968.36	99.88	0.1188	0.00914	0.10966					121	3973	100	2.32281	0.0091	2.31371
122	3972.67	99.99	0.17214	0.0092	0.16294					122	3973	100	1.13662	0.00963	1.12699
123	3971.46	99.96	0.22709	0.00914	0.21795					123	3972.35	99.98	3.14694	0.00879	3.13815
124	3973.01	100	0.08106	0.004	0.07706					124	3970.73	99.94	3.16391	0.00909	3.15482
125	3971.85	99.97	0.10677	0.00941	0.09736					125	3973	100	2.18613	0.00905	2.17708
126	3971.98	99.97	0.07558	0.00928	0.0663					126	3972.67	99.99	2.69286	0.00957	2.68329
127	3972.03	99.98	0.10181	0.0092	0.09261					127	3969.12	99.9	2.2261	0.00959	2.21651
128	3973	100	0.12223	0.00892	0.11331					128	3973	100	3.82135	0.0091	3.81225
129	3972.67	99.99	0.11519	0.00907	0.10612					129	3972.5	99.99	2.52063	0.00919	2.51144
130	3972.35	99.98	0.09331	0.00914	0.08417					130	3972.67	99.99	1.86327	0.00953	1.85374
131	3973.01	100	0.10627	0.00931	0.09696					131	3972.03	99.98	3.15632	0.00905	3.14727
132	3973.01	100	0.10615	0.00938	0.09677					132	3972.5	99.99	3.58332	0.00937	3.57395
133	3967.5	99.86	0.1992	0.00972	0.18948					133	3973	100	3.2458	0.00913	3.23667
134	3970.95	99.95	0.16977	0.00947	0.1603					134	3971.98	99.97	2.84782	0.00946	2.83836
135	3972.35	99.98	0.17252	0.00945	0.16307					135	3971.98	99.97	2.91774	0.00954	2.9082
136	3971.98	99.97	0.07304	0.00907	0.06397					136	3972.35	99.98	2.86063	0.00868	2.85195
137	3971.06	99.95	0.13545	0.00914	0.12631					137	3972.5	99.99	3.64975	0.0098	3.63995
138	3968.88	99.9	0.10643	0.009	0.09743					138	3972.67	99.99	2.72126	0.00931	2.71195
139	3972.67	99.99	0.13928	0.00918	0.1301					139	3971.98	99.97	1.26779	0.0094	1.25839
140	3971.46	99.96	0.10724	0.00929	0.09795					140	3972.35	99.98	0.51087	0.00883	0.50204
141	3970.73	99.94	0.16933	0.00909	0.16024					141	3972.67	99.99	1.46166	0.00966	1.452
142	3971.06	99.95	0.22319	0.00975	0.21344					142	3973.01	100	2.5705	0.00908	2.56142
143	3972.35	99.98	0.16378	0.00922	0.15456					143	3972.67	99.99	2.59303	0.00968	2.58335
144	3972.03	99.98	0.1414	0.00901	0.13239					144	3972.5	99.99	2.77773	0.00911	2.76862
145	3972.5	99.99	0.08794	0.0094	0.07854					145	3972.35	99.98	3.31594	0.00931	3.30663
146	3969.58	99.91	0.09851	0.00934	0.08917					146	3973.01	100	3.77284	0.00923	3.76361
147	3972.5	99.99	0.0774	0.0089	0.0685					147	3972.35	99.98	3.67993	0.00922	3.67071
148	3972.35	99.98	0.18261	0.00881	0.1738					148	3973	100	0.5362	0.0094	0.5268
149	3972.67	99.99	0.11397	0.00918	0.10479					149	3969.12	99.9	3.89517	0.00926	3.88591
150	3967.5	99.86	0.297	0.00935	0.28765					150	3972.5	99.99	0.60528	0.00935	0.59593
151	3972.35	99.98	0.1344	0.004	0.1304					151	3972.5	99.99	4.02465	0.0098	4.01485
152	3971.98	99.97	0.33989	0.009	0.33089					152	3972.03	99.98	1.79936	0.00899	1.79037
153	3971.98	99.97	0.07646	0.00903	0.06743					153	3973.01	100	3.6353	0.0087	3.6266
154	3972.67	99.99	0.1448	0.00921	0.13559					154	3972.35	99.98	3.25375	0.00914	3.24461
155	3970.41	99.93	0.10916	0.00997	0.09919					155	3970.41	99.93	3.05965	0.00917	3.05048
156	3971.98	99.97	0.2545	0.00895	0.24555					156	3972.35	99.98	2.49303	0.00887	2.48416
157	3971.46	99.96	0.18632	0.00946	0.17686					157	3972.67	99.99	1.07801	0.00943	1.06858
158	3972.67	99.99	0.15202	0.00913	0.14289					158	3969.12	99.9	3.6877	0.00927	3.67843
159	3971.98	99.97	0.29669	0.00933	0.28736					159	3972.35	99.98	3.7294	0.0094	3.72
160	3972.03	99.98	0.08522	0.0092	0.07602					160	3973.01	100	2.71937	0.00948	2.70989
161	3970.73	99.94	0.1058	0.00951	0.09629					161	3971.98	99.97	4.15557	0.0096	4.14597
162	3972.67	99.99	0.14478	0.0093	0.13548					162	3973	100	3.88241	0.0091	3.87331
163	3972.5	99.99	0.18643	0.00962	0.17681					163	3972.5	99.99	1.7822	0.00918	1.77302
164	3959.05	99.65	0.06296	0.009	0.05396					164	3970.73	99.94	3.84703	0.00934	3.83769
165	3972.35	99.98	0.30328	0.00917	0.29411					165	3973.01	100	3.88025	0.00945	3.8708
166	3973	100	0.2038	0.00936	0.19444					166	3972.35	99.98	3.06387	0.009	3.05487
167	3970.41	99.93	0.08929	0.00941	0.07988					167	3972.67	99.99	2.89189	0.00915	2.88274
168	3972.5	99.99	0.24967	0.00937	0.2403					168	3972.67	99.99	2.78569	0.00914	2.77655
169	3973.01	100	0.20162	0.00988	0.19174					169	3971.46	99.96	1.31019	0.00945	1.30074
170	3973	100	0.16009	0.009	0.15109					170	3973	100	1.97356	0.00938	1.96418
171	3971.46	99.96	0.12889	0.00909	0.1198					171	3972.35	99.98	2.07868	0.00916	2.06952
172	3972.67	99.99	0.08102	0.00879	0.07223					172	3972.35	99.98	2.07678	0.00921	2.06757
173	3971.98	99.97	0.18954	0.00918	0.18036					173	3973	100	3.15237	0.00905	3.14332
174	3963.71	99.77	0.1703	0.00963	0.16067					174	3973	100	3.52627	0.00945	3.51682
175	3968.82	99.89	0.08961	0.00911	0.0805					175	3972.67	99.99	1.03417	0.00907	1.0251
176	3972.35	99.98	0.15665	0.00957	0.14708					176	3971.98	99.97	3.34515	0.00903	3.33612
177	3966.53	99.84	0.12303	0.00944	0.11359					177	3973.01	100	3.30622	0.00924	3.29698
178	3972.35	99.98	0.07332	0.00935	0.06397					178	3972.67	99.99	2.84754	0.004	2.84354
179	3973	100	0.17744	0.00943	0.16801					179	3972.67	99.99	2.88069	0.00921	2.87148
180	3970.09	99.93	0.07023	0.0093	0.06093					180	3972.67	99.99	1.15418	0.00887	1.14531
181	3973	100	0.19676	0.00944	0.18732					181	3973.01	100	3.50071	0.0097	3.49101
182	3972.03	99.98	0.10213	0.00951	0.09262					182	3972.67	99.99	1.87175	0.00896	1.86279
183	3968.8	99.89	0.12704	0.00919	0.11785					183	3972.35	99.98	2.04716	0.00927	2.03789
184	3972.67	99.99	0.14854	0.00968	0.13886					184	3972.5	99.99	3.41318	0.00957	3.40361
185	3972.5	99.99	0.17008	0.0092	0.16088					185	3973	100	2.45904	0.00911	2.44993
186	3972.5	99.99	0.20554	0.00945	0.19609					186	3972.5	99.99	1.0669	0.00954	1.05736
187	3973	100	0.16158	0.00896	0.15262					187	3972.03	99.98	1.0964	0.00899	1.08741
188	3972.35	99.98	0.11594	0.00939	0.10655					188	3972.5	99.99	3.5893	0.00932	3.57998
189	3971.98	99.97	0.16849	0.00932	0.15917					189	3971.98	99.97	3.61032	0.00903	3.60129
190	3971.06	99.95	0.24012	0.00941	0.23071					190	3972.35	99.98	3.73302	0.00941	3.72361
191	3971.06	99.95	0.06479	0.00933	0.05546					191	3972.03	99.98	3.24697	0.00893	3.23804
192	3973	100	0.12664	0.00941	0.11723					192	3971.06	99.95	2.44226	0.00967	2.43259
193	3972.35	99.98	0.12005	0.00913	0.11092					193	3972.67	99.99	1.85093	0.0092	1.84173
194	3967.2	99.85	0.11566	0.00948	0.10618					194	3972.67	99.99	2.60219	0.00936	2.59283
195	3970.09	99.93	0.13159	0.00976	0.12183					195	3972.35	99.98	1.68719	0.00923	1.67796
196	3972.35	99.98	0.07982	0.00971	0.07011					196	3972.67	99.99	3.92452	0.00898	3.91554
197	3973.01	100	0.23836	0.0091	0.22926					197	3968.36	99.88	2.58944	0.00951	2.57993
198	3973	100	0.07985	0.00902	0.07083					198	3972.67	99.99	2.24882	0.00913	2.23969
199	3972.67	99.99	0.12414	0.00951	0.11463					199	3972.5	99.99	3.43463	0.00942	3.42521
200	3970.95	99.95	0.15192	0.00928	0.14264					200	3973.01	100	3.96181	0.0097	3.95211

## Sheet: 02_EHCFACO_Seeds(2)
Fast Converegnce Exp							Fast Converegnce Exp			Slow Converegnce Exp							Slow Converegnce Exp
#	CBLF	Quality	Taumax	Taumin	DeltaTauminmax		Global Optimal Solution =	3973.01		#	CBLF	Quality	Taumax	Taumin	DeltaTauminmax		Global Optimal Solution =	3973.01
1	3970.41	99.93	0.10246	0.00937	0.09309		Minimum Optimal Solution =	3960.39		1	3972.03	99.98	0.97538	0.00937	0.96601		Minimum Optimal Solution =	3967.18
2	3972.67	99.99	0.14566	0.00913	0.13653		Mean of Optimal Solution =	3971.5		2	3971.98	99.97	1.08819	0.00904	1.07915		Mean of Optimal Solution =	3972.46
3	3973.01	100	0.24401	0.00961	0.2344		Median of Optimal Solution =	3971.5		3	3973	100	3.92147	0.00954	3.91193		Median of Optimal Solution =	3972.46
4	3973	100	0.19972	0.00932	0.1904		Solution Standrad Deviation =	2.0709		4	3973	100	0.67855	0.00904	0.66951		Solution Standrad Deviation =	0.86769
5	3972.67	99.99	0.13661	0.00946	0.12715		Average Price =	25.415		5	3973	100	1.29514	0.004	1.29114		Average Price =	80.42
6	3968.88	99.9	0.11486	0.00943	0.10543		Relability =	89		6	3973.01	100	3.07267	0.00925	3.06342		Relability =	99
7	3973.01	100	0.2971	0.00951	0.28759		Normalized Price =	28.5562		7	3972.35	99.98	2.67086	0.00936	2.6615		Normalized Price =	81.2323
8	3972.35	99.98	0.18215	0.00945	0.1727		Average Solution Quality =	99.9619		8	3971.98	99.97	3.45348	0.0092	3.44428		Average Solution Quality =	99.9861
9	3969.58	99.91	0.1353	0.00927	0.12603		Average FDC =	-136.975		9	3972.5	99.99	2.08505	0.00931	2.07574		Average FDC =	-54.5347
10	3972.03	99.98	0.17558	0.00936	0.16622		Correlation Coefficent =	-0.70749		10	3971.06	99.95	4.05517	0.004	4.05117		Correlation Coefficent =	-1
11	3972.35	99.98	0.15964	0.00951	0.15013		Solution Robustness =	1917.74		11	3973.01	100	3.04614	0.00903	3.03711		Solution Robustness =	4578.23
12	3973	100	0.13562	0.00877	0.12685		Performance Rate =	0.035019		12	3972.67	99.99	3.34433	0.00923	3.3351		Performance Rate =	0.01231
13	3972.35	99.98	0.11904	0.00948	0.10956		Average Elapsed Time =	2.0914		13	3972.67	99.99	1.98318	0.00938	1.9738		Average Elapsed Time =	6.5645
14	3968.88	99.9	0.13994	0.00898	0.13096					14	3971.06	99.95	2.5091	0.0093	2.4998
15	3972.35	99.98	0.16356	0.00954	0.15402					15	3973	100	1.92248	0.00938	1.9131
16	3972.03	99.98	0.10146	0.00921	0.09225					16	3973	100	2.49487	0.00936	2.48551
17	3970.41	99.93	0.13505	0.00928	0.12577					17	3972.35	99.98	1.94923	0.00921	1.94002
18	3972.5	99.99	0.18872	0.00944	0.17928					18	3973	100	0.79102	0.00948	0.78154
19	3971.06	99.95	0.11118	0.0092	0.10198					19	3972.67	99.99	3.2971	0.00913	3.28797
20	3971.98	99.97	0.23378	0.0093	0.22448					20	3973	100	3.33988	0.00909	3.33079
21	3971.06	99.95	0.08476	0.00912	0.07564					21	3973	100	1.72702	0.00945	1.71757
22	3972.35	99.98	0.11563	0.00937	0.10626					22	3972.5	99.99	2.63322	0.00922	2.624
23	3973	100	0.10613	0.00931	0.09682					23	3972.03	99.98	2.67969	0.00918	2.67051
24	3973	100	0.15683	0.00905	0.14778					24	3973	100	3.46939	0.0092	3.46019
25	3972.5	99.99	0.09793	0.0094	0.08853					25	3973	100	2.66183	0.00905	2.65278
26	3965.24	99.8	0.14734	0.00961	0.13773					26	3971.06	99.95	2.75092	0.00961	2.74131
27	3972.35	99.98	0.09422	0.00906	0.08516					27	3972.5	99.99	2.64432	0.009	2.63532
28	3972.5	99.99	0.19024	0.00977	0.18047					28	3972.35	99.98	2.27763	0.00926	2.26837
29	3969.39	99.91	0.06769	0.00935	0.05834					29	3973	100	1.72995	0.00904	1.72091
30	3973	100	0.2534	0.00955	0.24385					30	3972.67	99.99	3.35845	0.00889	3.34956
31	3972.35	99.98	0.10971	0.00928	0.10043					31	3973	100	0.65061	0.00932	0.64129
32	3969.58	99.91	0.07816	0.009	0.06916					32	3973	100	3.56736	0.00896	3.5584
33	3972.67	99.99	0.15281	0.00953	0.14328					33	3973	100	2.33474	0.00915	2.32559
34	3973.01	100	0.1361	0.00956	0.12654					34	3972.03	99.98	3.52054	0.00923	3.51131
35	3972.5	99.99	0.18939	0.00918	0.18021					35	3971.98	99.97	2.51517	0.0091	2.50607
36	3973	100	0.15781	0.00924	0.14857					36	3972.03	99.98	2.3207	0.00942	2.31128
37	3973	100	0.17345	0.0094	0.16405					37	3972.67	99.99	1.01083	0.00938	1.00145
38	3970.09	99.93	0.07902	0.00957	0.06945					38	3973	100	0.85385	0.00927	0.84458
39	3973.01	100	0.07498	0.004	0.07098					39	3973.01	100	2.71329	0.00896	2.70433
40	3971.06	99.95	0.20186	0.009	0.19286					40	3972.35	99.98	2.74588	0.00935	2.73653
41	3972.67	99.99	0.11043	0.00935	0.10108					41	3972.67	99.99	2.93608	0.0087	2.92738
42	3973	100	0.12799	0.00946	0.11853					42	3972.67	99.99	0.66797	0.00921	0.65876
43	3972.67	99.99	0.17386	0.00938	0.16448					43	3972.03	99.98	1.43773	0.00921	1.42852
44	3973	100	0.13526	0.00914	0.12612					44	3973.01	100	1.90071	0.00967	1.89104
45	3967.84	99.87	0.08969	0.00912	0.08057					45	3973.01	100	3.27624	0.0098	3.26644
46	3973	100	0.31113	0.00938	0.30175					46	3972.35	99.98	1.70325	0.00917	1.69408
47	3971.98	99.97	0.10525	0.00937	0.09588					47	3971.46	99.96	3.64754	0.00968	3.63786
48	3970.09	99.93	0.17781	0.00943	0.16838					48	3972.35	99.98	1.40836	0.00932	1.39904
49	3971.98	99.97	0.3046	0.00927	0.29533					49	3973	100	2.17869	0.00923	2.16946
50	3971.06	99.95	0.12184	0.00951	0.11233					50	3972.67	99.99	2.56239	0.00913	2.55326
51	3972.5	99.99	0.16793	0.00914	0.15879					51	3973	100	2.96953	0.00943	2.9601
52	3971.98	99.97	0.13065	0.00952	0.12113					52	3973	100	4.04622	0.004	4.04222
53	3972.67	99.99	0.12423	0.00944	0.11479					53	3973	100	3.72788	0.00909	3.71879
54	3973.01	100	0.18315	0.00903	0.17412					54	3973	100	1.63037	0.00918	1.62119
55	3973.01	100	0.12343	0.00923	0.1142					55	3973	100	2.94081	0.00922	2.93159
56	3972.67	99.99	0.17406	0.00944	0.16462					56	3972.67	99.99	3.55663	0.00908	3.54755
57	3971.98	99.97	0.18733	0.00946	0.17787					57	3973	100	3.24635	0.00963	3.23672
58	3972.5	99.99	0.18738	0.00936	0.17802					58	3972.35	99.98	2.60862	0.0089	2.59972
59	3972.5	99.99	0.1496	0.00895	0.14065					59	3972.5	99.99	2.66059	0.00937	2.65122
60	3972.67	99.99	0.10236	0.00941	0.09295					60	3972.35	99.98	1.92141	0.00928	1.91213
61	3968.36	99.88	0.09816	0.00969	0.08847					61	3972.35	99.98	3.33057	0.00956	3.32101
62	3973.01	100	0.09942	0.00938	0.09004					62	3972.67	99.99	2.94417	0.00917	2.935
63	3973	100	0.14103	0.00895	0.13208					63	3972.5	99.99	1.00521	0.00932	0.99589
64	3972.67	99.99	0.14771	0.00918	0.13853					64	3972.5	99.99	2.97291	0.00888	2.96403
65	3972.35	99.98	0.11056	0.00939	0.10117					65	3972.35	99.98	3.47975	0.00939	3.47036
66	3970.09	99.93	0.17995	0.00946	0.17049					66	3973.01	100	3.41175	0.0089	3.40285
67	3971.98	99.97	0.10249	0.004	0.09849					67	3973.01	100	3.19204	0.00933	3.18271
68	3973	100	0.18067	0.00941	0.17126					68	3972.67	99.99	1.7739	0.00932	1.76458
69	3968.36	99.88	0.11432	0.00941	0.10491					69	3972.35	99.98	2.78865	0.00941	2.77924
70	3972.67	99.99	0.17081	0.00995	0.16086					70	3972.67	99.99	2.52583	0.004	2.52183
71	3971.98	99.97	0.16489	0.00982	0.15507					71	3972.67	99.99	2.41418	0.00925	2.40493
72	3973	100	0.13556	0.00877	0.12679					72	3971.98	99.97	3.24468	0.0095	3.23518
73	3972.35	99.98	0.07186	0.00914	0.06272					73	3969.12	99.9	2.65926	0.00908	2.65018
74	3973	100	0.15126	0.00932	0.14194					74	3972.67	99.99	3.12855	0.00913	3.11942
75	3973.01	100	0.08076	0.00932	0.07144					75	3973	100	4.3227	0.00937	4.31333
76	3971.06	99.95	0.09482	0.00939	0.08543					76	3972.35	99.98	3.599	0.00906	3.58994
77	3969.91	99.92	0.08934	0.00989	0.07945					77	3973	100	2.97764	0.00932	2.96832
78	3966.53	99.84	0.08603	0.00912	0.07691					78	3973.01	100	2.61453	0.00941	2.60512
79	3972.67	99.99	0.1242	0.0094	0.1148					79	3971.98	99.97	3.07757	0.00939	3.06818
80	3970.73	99.94	0.12396	0.00913	0.11483					80	3972.67	99.99	2.83822	0.00901	2.82921
81	3972.03	99.98	0.06742	0.00942	0.058					81	3972.5	99.99	1.85065	0.00894	1.84171
82	3970.73	99.94	0.1982	0.00978	0.18842					82	3972.67	99.99	2.74078	0.0092	2.73158
83	3973	100	0.10325	0.0093	0.09395					83	3973.01	100	2.12691	0.00932	2.11759
84	3972.67	99.99	0.13983	0.00915	0.13068					84	3972.5	99.99	3.5861	0.00909	3.57701
85	3972.67	99.99	0.23733	0.00921	0.22812					85	3967.18	99.85	3.47035	0.00938	3.46097
86	3970.73	99.94	0.11064	0.00921	0.10143					86	3972.35	99.98	2.30151	0.00933	2.29218
87	3973	100	0.18568	0.00945	0.17623					87	3972.35	99.98	1.36932	0.00913	1.36019
88	3970.41	99.93	0.09379	0.00931	0.08448					88	3969.12	99.9	3.35136	0.00917	3.34219
89	3968.36	99.88	0.09764	0.0093	0.08834					89	3972.67	99.99	3.67021	0.00934	3.66087
90	3972.03	99.98	0.26188	0.00947	0.25241					90	3972.35	99.98	3.41896	0.00914	3.40982
91	3973.01	100	0.28596	0.00926	0.2767					91	3972.5	99.99	3.88667	0.00951	3.87716
92	3970.73	99.94	0.1168	0.00943	0.10737					92	3973	100	0.91389	0.00934	0.90455
93	3965.26	99.8	0.09857	0.00931	0.08926					93	3973.01	100	2.15183	0.00954	2.14229
94	3971.98	99.97	0.18699	0.00947	0.17752					94	3973.01	100	3.05152	0.00929	3.04223
95	3972.35	99.98	0.11905	0.00898	0.11007					95	3972.03	99.98	2.52787	0.00949	2.51838
96	3973	100	0.08173	0.0096	0.07213					96	3971.46	99.96	2.49024	0.00944	2.4808
97	3972.67	99.99	0.08516	0.00889	0.07627					97	3973.01	100	2.5635	0.00926	2.55424
98	3972.5	99.99	0.07623	0.00917	0.06706					98	3971.98	99.97	4.31077	0.00972	4.30105
99	3972.67	99.99	0.26289	0.00923	0.25366					99	3972.67	99.99	3.36222	0.00915	3.35307
100	3972.35	99.98	0.16131	0.00902	0.15229					100	3972.67	99.99	2.67588	0.0092	2.66668
101	3972.5	99.99	0.11188	0.00908	0.1028					101	3972.5	99.99	0.44047	0.00911	0.43136
102	3970.41	99.93	0.13128	0.00928	0.122					102	3972.67	99.99	2.91182	0.00959	2.90223
103	3970.95	99.95	0.11055	0.00936	0.10119					103	3973	100	2.08994	0.00893	2.08101
104	3971.46	99.96	0.14702	0.004	0.14302					104	3973.01	100	3.5542	0.004	3.5502
105	3972.5	99.99	0.14025	0.00959	0.13066					105	3972.67	99.99	2.45078	0.00934	2.44144
106	3971.46	99.96	0.06585	0.00914	0.05671					106	3972.67	99.99	1.26161	0.0095	1.25211
107	3972.35	99.98	0.12728	0.00919	0.11809					107	3972.35	99.98	2.94741	0.00913	2.93828
108	3972.03	99.98	0.16536	0.00959	0.15577					108	3973	100	1.8456	0.00905	1.83655
109	3972.67	99.99	0.14023	0.00958	0.13065					109	3973	100	2.08567	0.00917	2.0765
110	3971.06	99.95	0.1813	0.0093	0.172					110	3973.01	100	4.20866	0.00926	4.1994
111	3972.35	99.98	0.09401	0.00931	0.0847					111	3972.67	99.99	1.81294	0.0088	1.80414
112	3971.98	99.97	0.17148	0.0091	0.16238					112	3969.39	99.91	3.99184	0.00949	3.98235
113	3972.35	99.98	0.16803	0.00936	0.15867					113	3973	100	3.50337	0.00936	3.49401
114	3970.95	99.95	0.13224	0.0089	0.12334					114	3972.5	99.99	1.86134	0.00959	1.85175
115	3972.03	99.98	0.11039	0.00888	0.10151					115	3972.35	99.98	3.58948	0.00953	3.57995
116	3971.46	99.96	0.10475	0.00909	0.09566					116	3973	100	3.5194	0.00931	3.51009
117	3971.52	99.96	0.0859	0.00948	0.07642					117	3972.5	99.99	1.56496	0.00932	1.55564
118	3973.01	100	0.16207	0.00879	0.15328					118	3972.35	99.98	2.99553	0.00914	2.98639
119	3973	100	0.10181	0.00922	0.09259					119	3971.98	99.97	2.1513	0.00953	2.14177
120	3970.73	99.94	0.16457	0.00962	0.15495					120	3972.67	99.99	1.82236	0.00899	1.81337
121	3973	100	0.12041	0.00927	0.11114					121	3973.01	100	1.23072	0.004	1.22672
122	3970.41	99.93	0.08439	0.0093	0.07509					122	3973.01	100	1.65188	0.00904	1.64284
123	3973	100	0.152	0.00932	0.14268					123	3967.5	99.86	3.89521	0.00911	3.8861
124	3970.43	99.94	0.07222	0.00934	0.06288					124	3970.73	99.94	2.78928	0.00946	2.77982
125	3971.98	99.97	0.18016	0.00919	0.17097					125	3973.01	100	4.05696	0.00922	4.04774
126	3972.67	99.99	0.12443	0.00913	0.1153					126	3972.67	99.99	2.51829	0.00939	2.5089
127	3973.01	100	0.17671	0.00964	0.16707					127	3970.09	99.93	3.71537	0.004	3.71137
128	3973.01	100	0.09265	0.00926	0.08339					128	3969.39	99.91	4.08505	0.0096	4.07545
129	3973	100	0.12348	0.00933	0.11415					129	3972.67	99.99	4.16339	0.004	4.15939
130	3969.44	99.91	0.11908	0.00903	0.11005					130	3973	100	3.89592	0.00929	3.88663
131	3972.67	99.99	0.1502	0.00948	0.14072					131	3973	100	1.06903	0.00953	1.0595
132	3972.5	99.99	0.28055	0.00898	0.27157					132	3973	100	3.69386	0.0097	3.68416
133	3964.74	99.79	0.11127	0.00921	0.10206					133	3972.67	99.99	2.72955	0.00912	2.72043
134	3970.09	99.93	0.19682	0.00942	0.1874					134	3973	100	3.27936	0.0091	3.27026
135	3968.88	99.9	0.07259	0.00914	0.06345					135	3973	100	3.18805	0.00891	3.17914
136	3971.46	99.96	0.12686	0.00956	0.1173					136	3972.67	99.99	2.94091	0.00919	2.93172
137	3972.03	99.98	0.23039	0.00951	0.22088					137	3971.46	99.96	2.37824	0.00896	2.36928
138	3972.67	99.99	0.10227	0.00943	0.09284					138	3972.35	99.98	2.54868	0.00943	2.53925
139	3971.46	99.96	0.09429	0.00878	0.08551					139	3972.35	99.98	4.07635	0.00947	4.06688
140	3973.01	100	0.14307	0.00944	0.13363					140	3973	100	3.18689	0.00938	3.17751
141	3972.35	99.98	0.21075	0.00936	0.20139					141	3973	100	3.13632	0.00961	3.12671
142	3972.67	99.99	0.16479	0.00955	0.15524					142	3971.98	99.97	2.65794	0.00934	2.6486
143	3967.84	99.87	0.07227	0.00961	0.06266					143	3970.09	99.93	2.85807	0.00936	2.84871
144	3972.35	99.98	0.08458	0.00917	0.07541					144	3973	100	2.67258	0.00898	2.6636
145	3973.01	100	0.13996	0.00988	0.13008					145	3973	100	3.03746	0.00951	3.02795
146	3973	100	0.10997	0.00923	0.10074					146	3973	100	2.97658	0.00927	2.96731
147	3972.5	99.99	0.1684	0.00951	0.15889					147	3972.67	99.99	2.99953	0.00867	2.99086
148	3965.27	99.81	0.09336	0.00909	0.08427					148	3972.35	99.98	2.25055	0.004	2.24655
149	3972.67	99.99	0.19767	0.00893	0.18874					149	3973.01	100	1.9103	0.00938	1.90092
150	3972.35	99.98	0.11049	0.00913	0.10136					150	3971.06	99.95	2.9778	0.00949	2.96831
151	3968.36	99.88	0.08047	0.00942	0.07105					151	3972.35	99.98	3.4397	0.00941	3.43029
152	3965.27	99.81	0.14142	0.00894	0.13248					152	3973	100	3.77087	0.009	3.76187
153	3970.43	99.94	0.09738	0.00903	0.08835					153	3972.67	99.99	3.87131	0.00893	3.86238
154	3973	100	0.15895	0.0095	0.14945					154	3972.35	99.98	2.13435	0.00925	2.1251
155	3972.35	99.98	0.13487	0.00956	0.12531					155	3972.5	99.99	2.24568	0.00937	2.23631
156	3972.35	99.98	0.1818	0.00928	0.17252					156	3972.35	99.98	3.50541	0.00919	3.49622
157	3967.18	99.85	0.09	0.00945	0.08055					157	3973	100	1.55074	0.00947	1.54127
158	3971.98	99.97	0.13904	0.00938	0.12966					158	3972.5	99.99	4.21051	0.00907	4.20144
159	3972.35	99.98	0.23915	0.00946	0.22969					159	3973.01	100	3.45552	0.00919	3.44633
160	3972.67	99.99	0.26299	0.00956	0.25343					160	3973	100	2.3671	0.00953	2.35757
161	3972.67	99.99	0.29017	0.00935	0.28082					161	3973	100	3.71947	0.00953	3.70994
162	3973	100	0.14711	0.00939	0.13772					162	3972.03	99.98	2.62212	0.00945	2.61267
163	3966.86	99.85	0.08577	0.00903	0.07674					163	3972.5	99.99	2.40898	0.00962	2.39936
164	3971.46	99.96	0.10143	0.00937	0.09206					164	3972.67	99.99	2.88842	0.00897	2.87945
165	3973.01	100	0.0809	0.00958	0.07132					165	3972.35	99.98	2.24717	0.0095	2.23767
166	3973	100	0.11429	0.00985	0.10444					166	3973	100	2.24609	0.00914	2.23695
167	3972.5	99.99	0.20125	0.00953	0.19172					167	3973	100	3.62164	0.00928	3.61236
168	3971.46	99.96	0.09391	0.00943	0.08448					168	3973.01	100	3.30241	0.00937	3.29304
169	3972.5	99.99	0.15719	0.00941	0.14778					169	3972.03	99.98	2.97189	0.00904	2.96285
170	3972.67	99.99	0.09765	0.00925	0.0884					170	3973	100	3.13683	0.00954	3.12729
171	3971.46	99.96	0.15357	0.00911	0.14446					171	3973	100	3.6062	0.00915	3.59705
172	3969.39	99.91	0.1102	0.004	0.1062					172	3972.67	99.99	1.81144	0.00903	1.80241
173	3973	100	0.16126	0.00931	0.15195					173	3972.67	99.99	3.95341	0.00899	3.94442
174	3971.46	99.96	0.11553	0.00926	0.10627					174	3973	100	0.66953	0.00893	0.6606
175	3971.98	99.97	0.106	0.00913	0.09687					175	3972.67	99.99	2.68005	0.00917	2.67088
176	3970.41	99.93	0.15779	0.00922	0.14857					176	3972.5	99.99	3.20964	0.00975	3.19989
177	3972.35	99.98	0.19602	0.00943	0.18659					177	3972.35	99.98	2.10292	0.00886	2.09406
178	3967.5	99.86	0.16917	0.00953	0.15964					178	3972.5	99.99	4.14986	0.00932	4.14054
179	3971.98	99.97	0.17212	0.004	0.16812					179	3971.46	99.96	2.79631	0.00902	2.78729
180	3972.03	99.98	0.13197	0.00916	0.12281					180	3971.98	99.97	1.93931	0.00917	1.93014
181	3972.03	99.98	0.0934	0.00938	0.08402					181	3973	100	1.70889	0.00936	1.69953
182	3971.06	99.95	0.14416	0.00876	0.1354					182	3972.67	99.99	3.18942	0.00935	3.18007
183	3972.35	99.98	0.17025	0.00915	0.1611					183	3973.01	100	4.24287	0.00932	4.23355
184	3971.98	99.97	0.12651	0.00898	0.11753					184	3973	100	2.4443	0.00896	2.43534
185	3961.64	99.71	0.09334	0.00929	0.08405					185	3973.01	100	4.18332	0.004	4.17932
186	3971.98	99.97	0.14776	0.00937	0.13839					186	3972.67	99.99	3.27263	0.00939	3.26324
187	3972.35	99.98	0.10596	0.00911	0.09685					187	3972.67	99.99	0.59809	0.00957	0.58852
188	3973.01	100	0.10203	0.00917	0.09286					188	3972.67	99.99	3.03995	0.0097	3.03025
189	3973	100	0.22739	0.00927	0.21812					189	3972.67	99.99	3.50122	0.00901	3.49221
190	3972.35	99.98	0.08834	0.00919	0.07915					190	3972.5	99.99	3.73134	0.00944	3.7219
191	3971.06	99.95	0.20257	0.00925	0.19332					191	3972.5	99.99	3.22863	0.00936	3.21927
192	3972.67	99.99	0.17711	0.00919	0.16792					192	3972.67	99.99	4.30473	0.00945	4.29528
193	3966.21	99.83	0.1619	0.00888	0.15302					193	3971.06	99.95	1.80833	0.00906	1.79927
194	3970.73	99.94	0.18488	0.00926	0.17562					194	3972.67	99.99	1.36429	0.00922	1.35507
195	3967.18	99.85	0.08114	0.00949	0.07165					195	3972.67	99.99	3.98498	0.00974	3.97524
196	3971.98	99.97	0.23623	0.00911	0.22712					196	3973.01	100	3.08885	0.00892	3.07993
197	3972.03	99.98	0.1238	0.0089	0.1149					197	3972.5	99.99	1.49973	0.00922	1.49051
198	3972.35	99.98	0.12866	0.00903	0.11963					198	3972.67	99.99	3.41288	0.00934	3.40354
199	3960.39	99.68	0.07648	0.00896	0.06752					199	3973	100	1.77215	0.0095	1.76265
200	3972.5	99.99	0.17343	0.00957	0.16386					200	3973.01	100	0.51484	0.00951	0.50533

## Sheet: 03_EHCFACO_Seeds(50)
Fast Converegnce Exp							Fast Converegnce Exp			Slow Converegnce Exp							Slow Converegnce Exp
#	CBLF	Quality	Taumax	Taumin	DeltaTauminmax		Global Optimal Solution =	3973.01		#	CBLF	Quality	Taumax	Taumin	DeltaTauminmax		Global Optimal Solution =	3973.01
1	3972.35	99.98	0.12859	0.00953	0.11906		Minimum Optimal Solution=	3952.85		1	3972.67	99.99	1.459	0.00953	1.44947		Minimum Optimal Solution =	3967.5
2	3970.73	99.94	0.14092	0.00936	0.13156		Mean of Optimal Solution =	3971.42		2	3972.67	99.99	2.88864	0.00905	2.87959		Mean of Optimal Solution =	3972.4
3	3970.73	99.94	0.1278	0.00956	0.11824		Median of Optimal Solution =	3971.42		3	3973	100	1.98233	0.00916	1.97317		Median of Optimal Solution =	3972.4
4	3971.98	99.97	0.11506	0.0095	0.10556		Solution Standrad Deviation =	2.3417		4	3972.5	99.99	2.2096	0.004	2.2056		Solution Standrad Deviation =	0.75985
5	3972.35	99.98	0.17975	0.00958	0.17017		Average Price =	25.28		5	3972.5	99.99	0.86836	0.00954	0.85882		Average Price =	81.76
6	3973	100	0.18332	0.00922	0.1741		Relability =	90		6	3972.35	99.98	0.69527	0.00921	0.68606		Relability =	98.5
7	3972.35	99.98	0.08983	0.00917	0.08066		Normalized Price =	28.0889		7	3973	100	1.07909	0.00913	1.06996		Normalized Price =	83.0051
8	3972.35	99.98	0.16245	0.0093	0.15315		Average Solution Quality =	99.9599		8	3970.73	99.94	2.79891	0.00953	2.78938		Average Solution Quality =	99.9848
9	3972.5	99.99	0.14395	0.009	0.13495		Average FDC =	-122.302		9	3973.01	100	0.8006	0.00902	0.79158		Average FDC =	-52.9616
10	3973	100	0.10636	0.004	0.10236		Correlation Coefficent =	-0.69581		10	3973	100	3.03507	0.0092	3.02587		Correlation Coefficent =	-0.69216
11	3972.5	99.99	0.08008	0.00928	0.0708		Solution Robustness =	1695.93		11	3972.5	99.99	1.46166	0.00968	1.45198		Solution Robustness =	5227.88
12	3969.12	99.9	0.06666	0.00958	0.05708		Performance Rate =	0.035601		12	3972.67	99.99	2.77002	0.00888	2.76114		Performance Rate =	0.012047
13	3973.01	100	0.24337	0.00898	0.23439		Average Elapsed Time =	2.0977		13	3972.67	99.99	1.57577	0.00925	1.56652		Average Elapsed Time =	6.768
14	3972.67	99.99	0.12798	0.0096	0.11838					14	3971.46	99.96	2.16711	0.00913	2.15798
15	3972.5	99.99	0.1447	0.00905	0.13565					15	3972.35	99.98	3.47359	0.00944	3.46415
16	3972.5	99.99	0.21067	0.00976	0.20091					16	3972.67	99.99	2.01307	0.00962	2.00345
17	3970.73	99.94	0.11039	0.00945	0.10094					17	3973.01	100	1.00163	0.00908	0.99255
18	3972.5	99.99	0.09276	0.00949	0.08327					18	3973	100	3.58024	0.00963	3.57061
19	3972.35	99.98	0.2238	0.00909	0.21471					19	3971.06	99.95	2.68441	0.00909	2.67532
20	3972.67	99.99	0.10576	0.00947	0.09629					20	3973.01	100	3.04344	0.00927	3.03417
21	3972.5	99.99	0.15622	0.00916	0.14706					21	3972.67	99.99	2.01144	0.00902	2.00242
22	3970.43	99.94	0.06246	0.00906	0.0534					22	3971.98	99.97	2.92082	0.00937	2.91145
23	3973.01	100	0.10322	0.00934	0.09388					23	3970.41	99.93	3.102	0.00949	3.09251
24	3971.7	99.97	0.08507	0.0093	0.07577					24	3972.67	99.99	2.51295	0.00968	2.50327
25	3973	100	0.32672	0.00955	0.31717					25	3973	100	2.84709	0.00903	2.83806
26	3970.41	99.93	0.08035	0.00916	0.07119					26	3973.01	100	3.249	0.00941	3.23959
27	3973.01	100	0.17352	0.00912	0.1644					27	3973	100	2.99875	0.00946	2.98929
28	3972.35	99.98	0.12739	0.00933	0.11806					28	3972.67	99.99	0.75193	0.0092	0.74273
29	3973	100	0.12466	0.009	0.11566					29	3972.67	99.99	2.01502	0.00918	2.00584
30	3971.06	99.95	0.17383	0.00936	0.16447					30	3972.67	99.99	1.66755	0.00964	1.65791
31	3972.67	99.99	0.17836	0.00919	0.16917					31	3972.67	99.99	2.80734	0.00967	2.79767
32	3972.67	99.99	0.08091	0.0092	0.07171					32	3972.35	99.98	2.81702	0.00982	2.8072
33	3972.67	99.99	0.15345	0.0095	0.14395					33	3972.5	99.99	2.66738	0.00931	2.65807
34	3970.09	99.93	0.15753	0.00968	0.14785					34	3973.01	100	2.01312	0.00931	2.00381
35	3972.5	99.99	0.2092	0.00937	0.19983					35	3972.35	99.98	1.88467	0.00973	1.87494
36	3971.46	99.96	0.13581	0.00972	0.12609					36	3972.67	99.99	3.17422	0.00952	3.1647
37	3972.35	99.98	0.12738	0.00929	0.11809					37	3972.5	99.99	3.37101	0.00901	3.362
38	3970.43	99.94	0.08538	0.00955	0.07583					38	3971.98	99.97	3.07723	0.00964	3.06759
39	3972.35	99.98	0.19588	0.00989	0.18599					39	3973	100	3.45289	0.00906	3.44383
40	3972.67	99.99	0.1277	0.00976	0.11794					40	3972.5	99.99	2.43096	0.00923	2.42173
41	3972.67	99.99	0.11431	0.00948	0.10483					41	3972.67	99.99	2.76383	0.00908	2.75475
42	3969.58	99.91	0.16111	0.00922	0.15189					42	3972.35	99.98	3.53544	0.00912	3.52632
43	3972.67	99.99	0.2292	0.00906	0.22014					43	3973	100	3.82165	0.00892	3.81273
44	3972.03	99.98	0.14853	0.00928	0.13925					44	3973.01	100	2.84368	0.00938	2.8343
45	3971.98	99.97	0.10998	0.00948	0.1005					45	3972.35	99.98	3.40944	0.00928	3.40016
46	3972.35	99.98	0.13113	0.00933	0.1218					46	3972.67	99.99	3.2634	0.00936	3.25404
47	3972.67	99.99	0.09275	0.00935	0.0834					47	3973.01	100	0.77885	0.00896	0.76989
48	3967.84	99.87	0.12414	0.00935	0.11479					48	3972.35	99.98	3.31434	0.00919	3.30515
49	3970.73	99.94	0.13111	0.00954	0.12157					49	3972.35	99.98	3.33614	0.00917	3.32697
50	3967.84	99.87	0.13724	0.00927	0.12797					50	3971.98	99.97	2.35118	0.00963	2.34155
51	3971.46	99.96	0.11535	0.00895	0.1064					51	3970.73	99.94	2.87458	0.00922	2.86536
52	3968.88	99.9	0.09722	0.00893	0.08829					52	3973.01	100	1.98787	0.00911	1.97876
53	3968.88	99.9	0.10115	0.00921	0.09194					53	3972.67	99.99	1.98705	0.0094	1.97765
54	3972.03	99.98	0.15479	0.004	0.15079					54	3972.5	99.99	3.9469	0.00958	3.93732
55	3971.06	99.95	0.11511	0.0095	0.10561					55	3972.35	99.98	2.19568	0.00902	2.18666
56	3972.03	99.98	0.12198	0.00958	0.1124					56	3972.35	99.98	1.08564	0.00918	1.07646
57	3970.73	99.94	0.07604	0.00968	0.06636					57	3972.5	99.99	3.03729	0.00987	3.02742
58	3970.73	99.94	0.0974	0.004	0.0934					58	3971.46	99.96	2.49183	0.00989	2.48194
59	3972.67	99.99	0.18798	0.00932	0.17866					59	3972.5	99.99	2.8331	0.00981	2.82329
60	3969.12	99.9	0.08662	0.00921	0.07741					60	3973	100	1.0017	0.00931	0.99239
61	3972.67	99.99	0.07211	0.004	0.06811					61	3973.01	100	1.54741	0.00951	1.5379
62	3973	100	0.15301	0.00915	0.14386					62	3972.5	99.99	3.12027	0.00917	3.1111
63	3973.01	100	0.14199	0.00942	0.13257					63	3971.98	99.97	2.65646	0.00942	2.64704
64	3973.01	100	0.17516	0.00906	0.1661					64	3973.01	100	3.18347	0.00954	3.17393
65	3970.95	99.95	0.09827	0.004	0.09427					65	3972.67	99.99	1.41396	0.00898	1.40498
66	3971.85	99.97	0.07155	0.00936	0.06219					66	3971.98	99.97	3.40338	0.00944	3.39394
67	3971.06	99.95	0.15204	0.00921	0.14283					67	3972.67	99.99	3.19682	0.00911	3.18771
68	3972.35	99.98	0.13127	0.00923	0.12204					68	3973	100	1.86931	0.00909	1.86022
69	3970.41	99.93	0.10279	0.00955	0.09324					69	3972.03	99.98	2.35266	0.00955	2.34311
70	3970.73	99.94	0.11527	0.00912	0.10615					70	3972.67	99.99	2.65775	0.00943	2.64832
71	3972.35	99.98	0.23072	0.00931	0.22141					71	3972.67	99.99	3.09761	0.00902	3.08859
72	3971.98	99.97	0.14564	0.00916	0.13648					72	3973	100	2.05092	0.00878	2.04214
73	3972.35	99.98	0.13091	0.00948	0.12143					73	3972.03	99.98	3.06479	0.00913	3.05566
74	3973.01	100	0.12686	0.00951	0.11735					74	3972.67	99.99	3.27038	0.00889	3.26149
75	3971.98	99.97	0.19677	0.00942	0.18735					75	3973	100	3.49588	0.00959	3.48629
76	3971.46	99.96	0.10286	0.0094	0.09346					76	3972.03	99.98	1.33085	0.00951	1.32134
77	3972.03	99.98	0.21184	0.00941	0.20243					77	3973	100	3.21721	0.00906	3.20815
78	3972.35	99.98	0.18852	0.00923	0.17929					78	3973.01	100	1.09462	0.00957	1.08505
79	3968.36	99.88	0.08011	0.00927	0.07084					79	3971.98	99.97	3.83629	0.00951	3.82678
80	3972.67	99.99	0.0892	0.00942	0.07978					80	3972.67	99.99	2.94191	0.00905	2.93286
81	3972.67	99.99	0.1227	0.00891	0.11379					81	3973.01	100	1.68465	0.0094	1.67525
82	3972.67	99.99	0.2247	0.0094	0.2153					82	3972.67	99.99	0.79504	0.00942	0.78562
83	3972.35	99.98	0.14972	0.00886	0.14086					83	3972.67	99.99	3.26759	0.00912	3.25847
84	3967.5	99.86	0.11779	0.00935	0.10844					84	3972.67	99.99	2.40364	0.00952	2.39412
85	3971.46	99.96	0.15301	0.00937	0.14364					85	3972.5	99.99	3.94013	0.00915	3.93098
86	3973	100	0.08168	0.0098	0.07188					86	3971.98	99.97	1.29254	0.00944	1.2831
87	3972.35	99.98	0.09741	0.00926	0.08815					87	3970.73	99.94	3.35319	0.00955	3.34364
88	3972.35	99.98	0.17887	0.00965	0.16922					88	3972.35	99.98	1.94687	0.00936	1.93751
89	3972.35	99.98	0.13535	0.00936	0.12599					89	3972.35	99.98	1.91923	0.0093	1.90993
90	3969.44	99.91	0.15996	0.00897	0.15099					90	3972.67	99.99	3.19585	0.00953	3.18632
91	3972.67	99.99	0.08904	0.00942	0.07962					91	3972.35	99.98	2.22633	0.00975	2.21658
92	3972.67	99.99	0.1795	0.00951	0.16999					92	3972.35	99.98	3.12187	0.00913	3.11274
93	3973.01	100	0.27237	0.00902	0.26335					93	3973.01	100	1.82284	0.00889	1.81395
94	3972.67	99.99	0.11317	0.00903	0.10414					94	3972.35	99.98	2.46497	0.00943	2.45554
95	3973	100	0.16004	0.00936	0.15068					95	3973.01	100	1.18737	0.00904	1.17833
96	3971.98	99.97	0.19686	0.00952	0.18734					96	3971.98	99.97	2.97518	0.00935	2.96583
97	3972.35	99.98	0.16918	0.00938	0.1598					97	3971.46	99.96	2.65041	0.00942	2.64099
98	3972.35	99.98	0.12166	0.00934	0.11232					98	3973	100	2.5943	0.00942	2.58488
99	3972.5	99.99	0.07641	0.00958	0.06683					99	3972.35	99.98	3.47596	0.00956	3.4664
100	3971.06	99.95	0.11547	0.00943	0.10604					100	3973.01	100	4.04964	0.00926	4.04038
101	3972.35	99.98	0.11735	0.00925	0.1081					101	3972.35	99.98	1.17142	0.0094	1.16202
102	3971.46	99.96	0.14633	0.0092	0.13713					102	3972.35	99.98	3.46268	0.00886	3.45382
103	3968.88	99.9	0.07765	0.00921	0.06844					103	3972.67	99.99	2.59256	0.00908	2.58348
104	3965.78	99.82	0.07636	0.00934	0.06702					104	3972.35	99.98	4.61437	0.00927	4.6051
105	3971.98	99.97	0.15165	0.00957	0.14208					105	3971.98	99.97	3.78383	0.00968	3.77415
106	3970.95	99.95	0.10697	0.00939	0.09758					106	3970.73	99.94	3.45607	0.00946	3.44661
107	3973	100	0.16437	0.0093	0.15507					107	3973	100	1.98911	0.00998	1.97913
108	3972.35	99.98	0.14111	0.00937	0.13174					108	3973.01	100	2.64784	0.00922	2.63862
109	3968.88	99.9	0.18886	0.00907	0.17979					109	3971.98	99.97	1.52358	0.00899	1.51459
110	3969.76	99.92	0.1978	0.00962	0.18818					110	3972.35	99.98	1.00055	0.00946	0.99109
111	3972.5	99.99	0.12676	0.0094	0.11736					111	3973	100	2.94248	0.00935	2.93313
112	3971.46	99.96	0.09262	0.00957	0.08305					112	3971.06	99.95	2.85111	0.00976	2.84135
113	3972.35	99.98	0.22854	0.00948	0.21906					113	3967.5	99.86	1.96791	0.00926	1.95865
114	3967.5	99.86	0.08114	0.00954	0.0716					114	3972.35	99.98	2.2554	0.00911	2.24629
115	3971.06	99.95	0.1642	0.00947	0.15473					115	3972.5	99.99	3.65367	0.00943	3.64424
116	3972.17	99.98	0.11069	0.0096	0.10109					116	3972.35	99.98	2.14728	0.00917	2.13811
117	3972.67	99.99	0.17284	0.00956	0.16328					117	3973	100	1.96026	0.00944	1.95082
118	3972.5	99.99	0.18659	0.00939	0.1772					118	3972.67	99.99	1.08828	0.00945	1.07883
119	3972.5	99.99	0.08024	0.00986	0.07038					119	3971.98	99.97	1.37918	0.00868	1.3705
120	3972.03	99.98	0.10609	0.0092	0.09689					120	3972.5	99.99	2.46193	0.00897	2.45296
121	3972.5	99.99	0.08554	0.00903	0.07651					121	3972.67	99.99	0.72921	0.00942	0.71979
122	3970.41	99.93	0.07617	0.00932	0.06685					122	3972.35	99.98	4.18297	0.00975	4.17322
123	3972.67	99.99	0.11594	0.00945	0.10649					123	3972.5	99.99	3.30717	0.00965	3.29752
124	3972.67	99.99	0.19722	0.00921	0.18801					124	3972.5	99.99	3.71427	0.00924	3.70503
125	3972.67	99.99	0.11529	0.00937	0.10592					125	3972.35	99.98	3.06362	0.00916	3.05446
126	3972.5	99.99	0.09439	0.00912	0.08527					126	3973	100	1.49021	0.00932	1.48089
127	3970.43	99.94	0.15125	0.00919	0.14206					127	3971.46	99.96	3.422	0.00933	3.41267
128	3972.35	99.98	0.19728	0.00927	0.18801					128	3971.98	99.97	2.4162	0.00893	2.40727
129	3962.67	99.74	0.12434	0.00923	0.11511					129	3973	100	2.69924	0.00972	2.68952
130	3972.67	99.99	0.15217	0.00891	0.14326					130	3972.5	99.99	1.59952	0.00897	1.59055
131	3972.67	99.99	0.15682	0.00978	0.14704					131	3968.8	99.89	3.58727	0.01004	3.57723
132	3970.95	99.95	0.1022	0.00987	0.09233					132	3973.01	100	2.46943	0.00915	2.46028
133	3972.03	99.98	0.11411	0.00913	0.10498					133	3973	100	2.29898	0.00913	2.28985
134	3967.18	99.85	0.08149	0.00943	0.07206					134	3973	100	3.25126	0.00933	3.24193
135	3970.73	99.94	0.11121	0.00934	0.10187					135	3972.03	99.98	2.89045	0.0094	2.88105
136	3972.67	99.99	0.21316	0.00935	0.20381					136	3972.67	99.99	2.71245	0.00935	2.7031
137	3971.46	99.96	0.2759	0.00914	0.26676					137	3972.35	99.98	3.12262	0.00943	3.11319
138	3970.41	99.93	0.16081	0.0091	0.15171					138	3972.5	99.99	3.83868	0.004	3.83468
139	3972.03	99.98	0.16143	0.00937	0.15206					139	3972.35	99.98	2.15563	0.00882	2.14681
140	3967.5	99.86	0.16699	0.00922	0.15777					140	3972.67	99.99	1.84825	0.009	1.83925
141	3972.03	99.98	0.14575	0.00946	0.13629					141	3972.67	99.99	2.48051	0.00935	2.47116
142	3972.67	99.99	0.14725	0.00953	0.13772					142	3972.67	99.99	2.40774	0.00901	2.39873
143	3972.35	99.98	0.11449	0.00963	0.10486					143	3973.01	100	1.63451	0.00896	1.62555
144	3963.09	99.75	0.09845	0.00913	0.08932					144	3972.5	99.99	2.64879	0.0096	2.63919
145	3972.67	99.99	0.15153	0.00924	0.14229					145	3973	100	2.09935	0.00925	2.0901
146	3961.68	99.71	0.10637	0.00963	0.09674					146	3973.01	100	2.1485	0.00959	2.13891
147	3971.46	99.96	0.17385	0.00935	0.1645					147	3972.35	99.98	2.83072	0.00931	2.82141
148	3973.01	100	0.17783	0.00907	0.16876					148	3972.67	99.99	2.94048	0.00894	2.93154
149	3972.67	99.99	0.1729	0.00922	0.16368					149	3971.98	99.97	3.00886	0.00947	2.99939
150	3971.98	99.97	0.15832	0.0087	0.14962					150	3971.98	99.97	0.90276	0.00947	0.89329
151	3973	100	0.09732	0.00963	0.08769					151	3971.98	99.97	1.96041	0.00927	1.95114
152	3972.17	99.98	0.15785	0.00955	0.1483					152	3972.35	99.98	3.42757	0.00967	3.4179
153	3973.01	100	0.23509	0.004	0.23109					153	3973.01	100	1.15548	0.00932	1.14616
154	3971.46	99.96	0.06386	0.00913	0.05473					154	3972.35	99.98	1.93448	0.00912	1.92536
155	3972.35	99.98	0.13819	0.00943	0.12876					155	3972.67	99.99	2.07612	0.00946	2.06666
156	3972.35	99.98	0.12791	0.00879	0.11912					156	3972.35	99.98	1.6278	0.00925	1.61855
157	3971.98	99.97	0.14419	0.00936	0.13483					157	3972.67	99.99	2.7421	0.00943	2.73267
158	3973.01	100	0.12399	0.00966	0.11433					158	3972.67	99.99	3.46135	0.00942	3.45193
159	3971.98	99.97	0.18103	0.00927	0.17176					159	3972.35	99.98	1.96908	0.0092	1.95988
160	3972.35	99.98	0.12727	0.0093	0.11797					160	3972.67	99.99	2.76891	0.00909	2.75982
161	3973	100	0.15237	0.00944	0.14293					161	3972.67	99.99	1.83243	0.00913	1.8233
162	3971.98	99.97	0.20523	0.00917	0.19606					162	3972.67	99.99	3.33519	0.00959	3.3256
163	3971.52	99.96	0.09775	0.00894	0.08881					163	3972.67	99.99	3.8994	0.00969	3.88971
164	3969.39	99.91	0.10508	0.00954	0.09554					164	3969.39	99.91	3.44587	0.00931	3.43656
165	3971.98	99.97	0.53149	0.00913	0.52236					165	3972.67	99.99	3.2044	0.00924	3.19516
166	3970.43	99.94	0.1195	0.00932	0.11018					166	3972.67	99.99	1.68443	0.00978	1.67465
167	3972.67	99.99	0.09893	0.00916	0.08977					167	3972.67	99.99	2.58003	0.00896	2.57107
168	3972.67	99.99	0.10838	0.00959	0.09879					168	3972.5	99.99	2.27051	0.00941	2.2611
169	3971.46	99.96	0.28664	0.00902	0.27762					169	3972.67	99.99	2.00185	0.00932	1.99253
170	3964.92	99.8	0.06804	0.00902	0.05902					170	3973	100	1.15776	0.00938	1.14838
171	3973	100	0.23199	0.0092	0.22279					171	3972.5	99.99	0.5632	0.00939	0.55381
172	3972.67	99.99	0.13844	0.00955	0.12889					172	3973	100	3.96647	0.0093	3.95717
173	3972.67	99.99	0.21037	0.00906	0.20131					173	3968.88	99.9	2.76763	0.00962	2.75801
174	3972.67	99.99	0.16403	0.00938	0.15465					174	3972.03	99.98	1.7387	0.00911	1.72959
175	3972.67	99.99	0.14138	0.0092	0.13218					175	3971.98	99.97	3.34338	0.00903	3.33435
176	3972.35	99.98	0.12639	0.00913	0.11726					176	3972.5	99.99	2.8389	0.00957	2.82933
177	3973	100	0.15786	0.00902	0.14884					177	3973	100	2.67249	0.00903	2.66346
178	3973	100	0.16484	0.00944	0.1554					178	3973.01	100	3.7955	0.00921	3.78629
179	3972.35	99.98	0.08916	0.00917	0.07999					179	3971.06	99.95	3.84859	0.00869	3.8399
180	3973	100	0.11962	0.00964	0.10998					180	3973	100	3.69319	0.00913	3.68406
181	3970.73	99.94	0.13081	0.00938	0.12143					181	3973	100	0.98114	0.00923	0.97191
182	3972.67	99.99	0.09369	0.00968	0.08401					182	3972.67	99.99	3.39732	0.0091	3.38822
183	3971.06	99.95	0.33021	0.00923	0.32098					183	3972.35	99.98	3.62834	0.00949	3.61885
184	3972.67	99.99	0.09686	0.00913	0.08773					184	3973	100	2.76569	0.00888	2.75681
185	3972.67	99.99	0.0807	0.00937	0.07133					185	3973	100	3.84285	0.004	3.83885
186	3972.67	99.99	0.21485	0.00937	0.20548					186	3972.67	99.99	1.15348	0.0092	1.14428
187	3972.35	99.98	0.24977	0.00996	0.23981					187	3972.03	99.98	1.71277	0.00918	1.70359
188	3952.85	99.49	0.07283	0.00941	0.06342					188	3972.35	99.98	2.18863	0.00937	2.17926
189	3971.46	99.96	0.11868	0.00934	0.10934					189	3973	100	0.90697	0.00951	0.89746
190	3971.46	99.96	0.11055	0.00967	0.10088					190	3972.03	99.98	4.38056	0.004	4.37656
191	3969.39	99.91	0.14677	0.00941	0.13736					191	3970.73	99.94	3.86075	0.0097	3.85105
192	3968.88	99.9	0.09056	0.00975	0.08081					192	3972.67	99.99	2.88348	0.00902	2.87446
193	3972.35	99.98	0.13546	0.00929	0.12617					193	3971.06	99.95	3.41534	0.00965	3.40569
194	3964.74	99.79	0.10139	0.00933	0.09206					194	3972.67	99.99	2.56743	0.00907	2.55836
195	3969.39	99.91	0.18742	0.00891	0.17851					195	3972.35	99.98	2.79081	0.00932	2.78149
196	3973	100	0.11143	0.00915	0.10228					196	3973	100	3.14364	0.00942	3.13422
197	3965.78	99.82	0.07267	0.00943	0.06324					197	3973.01	100	3.12406	0.00929	3.11477
198	3973.01	100	0.12312	0.00951	0.11361					198	3972.35	99.98	2.87644	0.00881	2.86763
199	3972.35	99.98	0.13183	0.00979	0.12204					199	3971.46	99.96	3.87466	0.00924	3.86542
200	3970.09	99.93	0.08888	0.00962	0.07926					200	3972.67	99.99	3.50273	0.00916	3.49357

## Sheet: 04_EHCFACO_Seeds(75)
Fast Converegnce Exp							Fast Converegnce Exp			Slow Converegnce Exp							Slow Converegnce Exp
#	CBLF	Quality	Taumax	Taumin	DeltaTauminmax		Global Optimal Solution =	3973.01		#	CBLF	Quality	Taumax	Taumin	DeltaTauminmax		Global Optimal Solution =	3973.01
1	3970.41	99.93	0.24268	0.0095	0.23318		Minimum Optimal Solution =	3961.12		1	3970.41	99.93	4.14179	0.0095	4.13229		Minimum Optimal Solution =	3967.5
2	3972.67	99.99	0.22586	0.00984	0.21602		Mean of Optimal Solution =	3971.3		2	3973	100	2.77551	0.004	2.77151		Mean of Optimal Solution =	3972.38
3	3972.17	99.98	0.15224	0.00969	0.14255		Median of Optimal Solution =	3971.3		3	3972.35	99.98	3.0853	0.00951	3.07579		Median of Optimal Solution =	3972.38
4	3972.67	99.99	0.12284	0.00961	0.11323		Solution Standrad Deviation =	2.1254		4	3973	100	1.47844	0.00945	1.46899		Solution Standrad Deviation =	0.78182
5	3972.67	99.99	0.11422	0.00927	0.10495		Average Price =	25.895		5	3972.67	99.99	1.67174	0.00911	1.66263		Average Price =	80.445
6	3971.98	99.97	0.10568	0.00962	0.09606		Relability =	82		6	3972.5	99.99	1.8959	0.00939	1.88651		Relability =	99
7	3972.5	99.99	0.1108	0.00886	0.10194		Normalized Price =	31.5793		7	3972.5	99.99	1.16212	0.00945	1.15267		Normalized Price =	81.2576
8	3968.88	99.9	0.15577	0.00927	0.1465		Average Solution Quality =	99.9571		8	3972.35	99.98	3.05164	0.00957	3.04207		Average Solution Quality =	99.984
9	3973.01	100	0.12839	0.00918	0.11921		Average FDC =	-130.238		9	3972.35	99.98	2.95871	0.00964	2.94907		Average FDC =	-53.0164
10	3965.26	99.8	0.0722	0.00933	0.06287		Correlation Coefficent =	-0.6944		10	3972.67	99.99	2.7713	0.00894	2.76236		Correlation Coefficent =	-0.70317
11	3967.18	99.85	0.11177	0.00931	0.10246		Solution Robustness =	1868.48		11	3972.5	99.99	2.18048	0.00947	2.17101		Solution Robustness =	5080.95
12	3970.73	99.94	0.14992	0.00922	0.1407		Performance Rate =	0.031666		12	3972.5	99.99	3.40302	0.00933	3.39369		Performance Rate =	0.012307
13	3971.46	99.96	0.10152	0.00928	0.09224		Average Elapsed Time =	2.1899		13	3971.46	99.96	2.55895	0.00908	2.54987		Average Elapsed Time =	6.7957
14	3972.67	99.99	0.13581	0.00916	0.12665					14	3972.67	99.99	3.94795	0.0097	3.93825
15	3972.67	99.99	0.09355	0.00962	0.08393					15	3973	100	2.60481	0.0089	2.59591
16	3968.8	99.89	0.13178	0.00939	0.12239					16	3972.67	99.99	2.43925	0.00998	2.42927
17	3968.36	99.88	0.08481	0.00961	0.0752					17	3972.35	99.98	2.83653	0.004	2.83253
18	3967.84	99.87	0.10578	0.004	0.10178					18	3972.35	99.98	2.07397	0.00962	2.06435
19	3971.98	99.97	0.12348	0.00926	0.11422					19	3973	100	3.03868	0.00945	3.02923
20	3972.5	99.99	0.19322	0.00921	0.18401					20	3972.67	99.99	1.96205	0.00954	1.95251
21	3971.46	99.96	0.14327	0.00906	0.13421					21	3972.35	99.98	2.70536	0.00922	2.69614
22	3973	100	0.23323	0.00925	0.22398					22	3971.06	99.95	3.00803	0.00929	2.99874
23	3973	100	0.10189	0.00925	0.09264					23	3973	100	0.90023	0.00954	0.89069
24	3973	100	0.10697	0.00954	0.09743					24	3971.98	99.97	2.568	0.00932	2.55868
25	3971.46	99.96	0.06791	0.00954	0.05837					25	3972.67	99.99	1.68022	0.00922	1.671
26	3973	100	0.19818	0.00913	0.18905					26	3971.98	99.97	2.94488	0.00891	2.93597
27	3972.35	99.98	0.15083	0.00879	0.14204					27	3972.35	99.98	2.90165	0.00957	2.89208
28	3973.01	100	0.32003	0.00919	0.31084					28	3971.06	99.95	3.89929	0.00899	3.8903
29	3972.67	99.99	0.16339	0.00923	0.15416					29	3972.67	99.99	1.46471	0.00936	1.45535
30	3972.17	99.98	0.08523	0.00921	0.07602					30	3971.98	99.97	0.83643	0.00935	0.82708
31	3973.01	100	0.12655	0.00918	0.11737					31	3972.67	99.99	3.32336	0.00899	3.31437
32	3971.38	99.96	0.09321	0.00948	0.08373					32	3973	100	2.83396	0.00933	2.82463
33	3967.18	99.85	0.11481	0.00894	0.10587					33	3972.5	99.99	3.53444	0.00904	3.5254
34	3972.35	99.98	0.1567	0.0092	0.1475					34	3972.5	99.99	2.87386	0.00905	2.86481
35	3972.67	99.99	0.13651	0.00945	0.12706					35	3973	100	2.43875	0.00926	2.42949
36	3972.35	99.98	0.10984	0.00909	0.10075					36	3970.73	99.94	3.14262	0.00982	3.1328
37	3972.35	99.98	0.12622	0.00974	0.11648					37	3972.67	99.99	2.14823	0.00925	2.13898
38	3970.41	99.93	0.15228	0.00928	0.143					38	3972.67	99.99	2.69038	0.00895	2.68143
39	3972.67	99.99	0.1748	0.00945	0.16535					39	3972.35	99.98	1.87351	0.00937	1.86414
40	3973	100	0.16884	0.00956	0.15928					40	3971.98	99.97	2.33831	0.00927	2.32904
41	3971.98	99.97	0.14854	0.00911	0.13943					41	3973.01	100	1.47971	0.00918	1.47053
42	3972.5	99.99	0.0811	0.00925	0.07185					42	3972.35	99.98	3.21247	0.00951	3.20296
43	3973	100	0.13598	0.00904	0.12694					43	3972.35	99.98	2.23476	0.00926	2.2255
44	3972.5	99.99	0.24804	0.00911	0.23893					44	3973	100	1.71159	0.00922	1.70237
45	3972.03	99.98	0.21162	0.00931	0.20231					45	3972.67	99.99	2.83453	0.0094	2.82513
46	3973	100	0.13911	0.0097	0.12941					46	3972.67	99.99	3.14958	0.00883	3.14075
47	3972.67	99.99	0.1066	0.00924	0.09736					47	3973	100	2.32068	0.00909	2.31159
48	3971.46	99.96	0.0774	0.0091	0.0683					48	3973	100	1.26931	0.00892	1.26039
49	3967.33	99.86	0.10973	0.00884	0.10089					49	3973.01	100	2.86662	0.00919	2.85743
50	3971.98	99.97	0.17646	0.00975	0.16671					50	3972.67	99.99	3.47166	0.00946	3.4622
51	3972.35	99.98	0.09433	0.00906	0.08527					51	3972.35	99.98	2.1407	0.00868	2.13202
52	3972.67	99.99	0.1543	0.00929	0.14501					52	3972.35	99.98	1.38912	0.00941	1.37971
53	3973	100	0.15554	0.00975	0.14579					53	3973	100	4.73896	0.01	4.72896
54	3968.88	99.9	0.09863	0.00899	0.08964					54	3971.98	99.97	3.3419	0.00932	3.33258
55	3961.12	99.7	0.08479	0.00939	0.0754					55	3970.41	99.93	4.09051	0.00949	4.08102
56	3971.98	99.97	0.11651	0.00928	0.10723					56	3971.98	99.97	3.18859	0.00928	3.17931
57	3972.35	99.98	0.13616	0.00907	0.12709					57	3969.12	99.9	3.0914	0.00925	3.08215
58	3967.18	99.85	0.11139	0.00898	0.10241					58	3972.35	99.98	3.34397	0.00908	3.33489
59	3969.39	99.91	0.07709	0.00935	0.06774					59	3973	100	2.13773	0.0092	2.12853
60	3967.5	99.86	0.14865	0.00954	0.13911					60	3973.01	100	3.65606	0.00921	3.64685
61	3972.35	99.98	0.27572	0.00944	0.26628					61	3972.35	99.98	0.46438	0.0094	0.45498
62	3962.98	99.75	0.11992	0.00932	0.1106					62	3973	100	1.9696	0.00911	1.96049
63	3973.01	100	0.19486	0.00872	0.18614					63	3973	100	3.15362	0.00927	3.14435
64	3970.09	99.93	0.1216	0.00927	0.11233					64	3973	100	2.33285	0.00909	2.32376
65	3972.5	99.99	0.07583	0.00941	0.06642					65	3973	100	0.80185	0.00908	0.79277
66	3973.01	100	0.24131	0.00958	0.23173					66	3972.67	99.99	2.79406	0.00913	2.78493
67	3973	100	0.18042	0.00916	0.17126					67	3972.35	99.98	2.32347	0.00954	2.31393
68	3968.36	99.88	0.08488	0.00917	0.07571					68	3972.67	99.99	2.92249	0.00911	2.91338
69	3972.67	99.99	0.13195	0.00886	0.12309					69	3972.67	99.99	0.98827	0.00927	0.979
70	3972.67	99.99	0.13097	0.00929	0.12168					70	3973	100	2.71782	0.00875	2.70907
71	3972.35	99.98	0.13987	0.00905	0.13082					71	3972.67	99.99	0.99145	0.0094	0.98205
72	3967.18	99.85	0.10538	0.00955	0.09583					72	3972.5	99.99	0.58223	0.00939	0.57284
73	3972.67	99.99	0.22198	0.00945	0.21253					73	3972.67	99.99	2.32043	0.00948	2.31095
74	3972.5	99.99	0.19329	0.00932	0.18397					74	3972.67	99.99	1.38258	0.00901	1.37357
75	3972.67	99.99	0.12462	0.00929	0.11533					75	3972.5	99.99	0.66131	0.00945	0.65186
76	3969.91	99.92	0.11502	0.00902	0.106					76	3972.67	99.99	3.4516	0.00946	3.44214
77	3972.35	99.98	0.1101	0.004	0.1061					77	3973	100	2.24353	0.00904	2.23449
78	3968.36	99.88	0.11718	0.004	0.11318					78	3972.5	99.99	2.81359	0.00904	2.80455
79	3972.67	99.99	0.10218	0.00907	0.09311					79	3972.35	99.98	3.35191	0.00948	3.34243
80	3972.67	99.99	0.08054	0.00952	0.07102					80	3972.35	99.98	3.19492	0.0095	3.18542
81	3972.5	99.99	0.17511	0.0092	0.16591					81	3973	100	1.17671	0.00953	1.16718
82	3968.88	99.9	0.11928	0.00919	0.11009					82	3973.01	100	3.23141	0.004	3.22741
83	3973.01	100	0.48548	0.00916	0.47632					83	3973	100	3.7253	0.0091	3.7162
84	3973.01	100	0.10421	0.00925	0.09496					84	3973	100	3.91284	0.00967	3.90317
85	3971.46	99.96	0.09772	0.004	0.09372					85	3971.46	99.96	3.00755	0.00969	2.99786
86	3973.01	100	0.14824	0.00943	0.13881					86	3972.35	99.98	1.66836	0.00915	1.65921
87	3972.67	99.99	0.16892	0.00962	0.1593					87	3967.5	99.86	3.61357	0.00911	3.60446
88	3972.67	99.99	0.11075	0.00911	0.10164					88	3973	100	2.94661	0.00905	2.93756
89	3972.5	99.99	0.10161	0.00955	0.09206					89	3971.46	99.96	3.7295	0.00949	3.72001
90	3970.43	99.94	0.08858	0.009	0.07958					90	3972.5	99.99	2.15691	0.00913	2.14778
91	3970.95	99.95	0.13389	0.00927	0.12462					91	3973.01	100	1.74955	0.00934	1.74021
92	3969.76	99.92	0.15266	0.00911	0.14355					92	3972.35	99.98	2.08526	0.00901	2.07625
93	3972.03	99.98	0.18197	0.00945	0.17252					93	3972.5	99.99	3.43914	0.00944	3.4297
94	3972.67	99.99	0.12378	0.0093	0.11448					94	3971.98	99.97	3.60971	0.00908	3.60063
95	3973	100	0.14364	0.00927	0.13437					95	3973	100	2.49298	0.00898	2.484
96	3973.01	100	0.15232	0.00973	0.14259					96	3972.35	99.98	2.87186	0.00958	2.86228
97	3972.67	99.99	0.23713	0.00927	0.22786					97	3972.35	99.98	2.59479	0.00938	2.58541
98	3973.01	100	0.08141	0.00942	0.07199					98	3972.03	99.98	2.53546	0.00911	2.52635
99	3967.18	99.85	0.2625	0.00871	0.25379					99	3971.98	99.97	3.46571	0.00944	3.45627
100	3970.41	99.93	0.20037	0.00933	0.19104					100	3972.67	99.99	3.6385	0.00915	3.62935
101	3971.06	99.95	0.11547	0.009	0.10647					101	3973	100	2.87433	0.004	2.87033
102	3971.98	99.97	0.15131	0.00942	0.14189					102	3970.41	99.93	2.52748	0.0097	2.51778
103	3971.98	99.97	0.18587	0.00929	0.17658					103	3972.67	99.99	1.26779	0.00913	1.25866
104	3970.09	99.93	0.14784	0.00966	0.13818					104	3972.5	99.99	3.09454	0.00949	3.08505
105	3971.46	99.96	0.15249	0.00917	0.14332					105	3972.67	99.99	4.28656	0.00907	4.27749
106	3964.74	99.79	0.06447	0.00943	0.05504					106	3973	100	3.19616	0.00899	3.18717
107	3966.21	99.83	0.08431	0.00909	0.07522					107	3971.46	99.96	2.14874	0.00935	2.13939
108	3971.46	99.96	0.12389	0.0091	0.11479					108	3972.67	99.99	2.86027	0.00933	2.85094
109	3969.12	99.9	0.15975	0.00972	0.15003					109	3972.67	99.99	2.29617	0.00938	2.28679
110	3970.73	99.94	0.13542	0.00921	0.12621					110	3973.01	100	2.9564	0.00937	2.94703
111	3966.53	99.84	0.12687	0.00935	0.11752					111	3972.67	99.99	3.38705	0.0094	3.37765
112	3972.5	99.99	0.20969	0.00945	0.20024					112	3972.5	99.99	3.82301	0.00914	3.81387
113	3971.98	99.97	0.14432	0.00933	0.13499					113	3970.73	99.94	3.37236	0.00973	3.36263
114	3970.95	99.95	0.11497	0.00923	0.10574					114	3973.01	100	2.74164	0.00941	2.73223
115	3972.35	99.98	0.16098	0.00948	0.1515					115	3970.09	99.93	2.94579	0.00886	2.93693
116	3973	100	0.11567	0.00958	0.10609					116	3973.01	100	4.06063	0.00971	4.05092
117	3972.35	99.98	0.08411	0.00917	0.07494					117	3972.35	99.98	2.56037	0.00913	2.55124
118	3972.35	99.98	0.11095	0.00925	0.1017					118	3972.67	99.99	2.45344	0.00917	2.44427
119	3967.5	99.86	0.15161	0.00921	0.1424					119	3972.67	99.99	3.64773	0.00952	3.63821
120	3970.41	99.93	0.0633	0.00945	0.05385					120	3972.67	99.99	3.28429	0.00955	3.27474
121	3972.35	99.98	0.13439	0.00949	0.1249					121	3971.46	99.96	2.095	0.00942	2.08558
122	3972.35	99.98	0.2018	0.0091	0.1927					122	3971.98	99.97	3.09854	0.00899	3.08955
123	3968.88	99.9	0.15215	0.00914	0.14301					123	3973.01	100	4.05512	0.0093	4.04582
124	3972.5	99.99	0.13568	0.00907	0.12661					124	3973	100	3.7877	0.00954	3.77816
125	3970.09	99.93	0.1888	0.00944	0.17936					125	3972.5	99.99	3.57239	0.00906	3.56333
126	3972.5	99.99	0.09407	0.00926	0.08481					126	3971.46	99.96	2.06679	0.00941	2.05738
127	3968.88	99.9	0.10584	0.0095	0.09634					127	3972.35	99.98	2.79051	0.0093	2.78121
128	3973.01	100	0.15689	0.00918	0.14771					128	3968.88	99.9	3.36652	0.00978	3.35674
129	3968.36	99.88	0.1019	0.00913	0.09277					129	3972.35	99.98	3.29511	0.00942	3.28569
130	3972.35	99.98	0.17736	0.0094	0.16796					130	3972.5	99.99	0.82099	0.00924	0.81175
131	3972.35	99.98	0.18877	0.0094	0.17937					131	3972.35	99.98	1.70498	0.00918	1.6958
132	3973	100	0.12423	0.00956	0.11467					132	3972.67	99.99	3.06935	0.00903	3.06032
133	3970.23	99.93	0.19615	0.00887	0.18728					133	3972.5	99.99	2.55355	0.00935	2.5442
134	3971.85	99.97	0.13969	0.00947	0.13022					134	3972.67	99.99	2.03861	0.00973	2.02888
135	3972.35	99.98	0.21868	0.00905	0.20963					135	3972.35	99.98	3.46197	0.00938	3.45259
136	3972.67	99.99	0.0831	0.0093	0.0738					136	3972.03	99.98	2.59189	0.00915	2.58274
137	3972.35	99.98	0.21726	0.00938	0.20788					137	3971.06	99.95	3.3113	0.00972	3.30158
138	3972.67	99.99	0.1954	0.00962	0.18578					138	3973.01	100	1.65051	0.00952	1.64099
139	3968.8	99.89	0.13692	0.00931	0.12761					139	3972.35	99.98	3.05786	0.00959	3.04827
140	3971.06	99.95	0.0969	0.00907	0.08783					140	3972.5	99.99	3.73195	0.00923	3.72272
141	3971.46	99.96	0.18199	0.00918	0.17281					141	3972.67	99.99	2.03213	0.00926	2.02287
142	3972.5	99.99	0.18487	0.00947	0.1754					142	3972.67	99.99	1.59321	0.00922	1.58399
143	3971.98	99.97	0.1609	0.00921	0.15169					143	3971.98	99.97	2.58912	0.00971	2.57941
144	3972.67	99.99	0.13886	0.00948	0.12938					144	3973	100	4.46155	0.004	4.45755
145	3970.95	99.95	0.13978	0.00933	0.13045					145	3973.01	100	2.6125	0.00949	2.60301
146	3972.67	99.99	0.19859	0.00997	0.18862					146	3972.67	99.99	2.25614	0.0088	2.24734
147	3971.46	99.96	0.14489	0.00889	0.136					147	3973	100	3.27021	0.00935	3.26086
148	3970.95	99.95	0.08533	0.0093	0.07603					148	3972.35	99.98	3.12866	0.00922	3.11944
149	3972.5	99.99	0.15534	0.00905	0.14629					149	3972.35	99.98	3.37283	0.0092	3.36363
150	3971.46	99.96	0.15774	0.00884	0.1489					150	3970.95	99.95	1.04177	0.00925	1.03252
151	3972.35	99.98	0.17088	0.00943	0.16145					151	3972.67	99.99	2.56709	0.00947	2.55762
152	3968.8	99.89	0.10344	0.00915	0.09429					152	3971.98	99.97	3.2182	0.00949	3.20871
153	3969.12	99.9	0.16353	0.00933	0.1542					153	3971.46	99.96	3.95603	0.00908	3.94695
154	3972.5	99.99	0.16917	0.0095	0.15967					154	3972.67	99.99	3.41927	0.00931	3.40996
155	3973	100	0.10719	0.00923	0.09796					155	3972.35	99.98	3.39461	0.00937	3.38524
156	3973	100	0.1057	0.00947	0.09623					156	3972.67	99.99	3.37837	0.00948	3.36889
157	3972.5	99.99	0.09981	0.004	0.09581					157	3972.67	99.99	0.68544	0.00971	0.67573
158	3973.01	100	0.08891	0.00927	0.07964					158	3973.01	100	3.65518	0.00981	3.64537
159	3967.84	99.87	0.09412	0.00934	0.08478					159	3971.46	99.96	0.99967	0.00969	0.98998
160	3972.67	99.99	0.21952	0.00911	0.21041					160	3973.01	100	3.40637	0.004	3.40237
161	3970.95	99.95	0.12802	0.00938	0.11864					161	3973	100	3.53959	0.00882	3.53077
162	3971.46	99.96	0.11477	0.004	0.11077					162	3972.35	99.98	2.2832	0.00951	2.27369
163	3968.36	99.88	0.24564	0.00937	0.23627					163	3972.5	99.99	2.47785	0.00905	2.4688
164	3973	100	0.17247	0.00965	0.16282					164	3973.01	100	3.0027	0.00952	2.99318
165	3968.36	99.88	0.10419	0.00926	0.09493					165	3971.98	99.97	3.34483	0.00969	3.33514
166	3972.67	99.99	0.08392	0.00904	0.07488					166	3972.67	99.99	1.64518	0.00936	1.63582
167	3971.98	99.97	0.21823	0.00917	0.20906					167	3970.41	99.93	4.26823	0.00937	4.25886
168	3966.56	99.84	0.09435	0.00894	0.08541					168	3972.67	99.99	0.76134	0.0092	0.75214
169	3973	100	0.1458	0.00929	0.13651					169	3971.46	99.96	1.81775	0.00906	1.80869
170	3972.35	99.98	0.08901	0.00983	0.07918					170	3973.01	100	1.08597	0.00915	1.07682
171	3971.06	99.95	0.22553	0.00932	0.21621					171	3972.67	99.99	1.96325	0.00953	1.95372
172	3973	100	0.12153	0.004	0.11753					172	3972.35	99.98	2.69047	0.00937	2.6811
173	3973.01	100	0.11013	0.00925	0.10088					173	3972.67	99.99	3.49867	0.00957	3.4891
174	3972.03	99.98	0.19316	0.00924	0.18392					174	3972.67	99.99	0.63135	0.00972	0.62163
175	3973	100	0.1825	0.00933	0.17317					175	3972.67	99.99	3.36263	0.00933	3.3533
176	3973.01	100	0.15146	0.00946	0.142					176	3970.41	99.93	2.13744	0.00927	2.12817
177	3967.97	99.87	0.08181	0.00931	0.0725					177	3973	100	2.4159	0.00927	2.40663
178	3968.8	99.89	0.08977	0.00931	0.08046					178	3972.35	99.98	3.04726	0.00913	3.03813
179	3969.39	99.91	0.20512	0.00959	0.19553					179	3971.98	99.97	3.86371	0.00958	3.85413
180	3973.01	100	0.14652	0.00947	0.13705					180	3973.01	100	3.40542	0.00961	3.39581
181	3972.67	99.99	0.10287	0.00924	0.09363					181	3972.67	99.99	1.97586	0.00914	1.96672
182	3967.33	99.86	0.09409	0.00945	0.08464					182	3972.35	99.98	3.60432	0.004	3.60032
183	3972.35	99.98	0.08074	0.00954	0.0712					183	3973.01	100	2.26271	0.00962	2.25309
184	3972.67	99.99	0.15741	0.00936	0.14805					184	3972.35	99.98	2.81478	0.00922	2.80556
185	3973	100	0.21904	0.004	0.21504					185	3973	100	2.41878	0.00923	2.40955
186	3972.67	99.99	0.12008	0.00912	0.11096					186	3972.5	99.99	3.68541	0.00969	3.67572
187	3973	100	0.08857	0.00915	0.07942					187	3973.01	100	3.34089	0.00968	3.33121
188	3966.53	99.84	0.09708	0.00899	0.08809					188	3972.5	99.99	2.85378	0.00934	2.84444
189	3968.88	99.9	0.07723	0.00928	0.06795					189	3972.67	99.99	3.25732	0.00905	3.24827
190	3973.01	100	0.15331	0.00936	0.14395					190	3972.35	99.98	0.7611	0.00901	0.75209
191	3972.35	99.98	0.08543	0.00976	0.07567					191	3971.06	99.95	2.95242	0.0091	2.94332
192	3970.41	99.93	0.14848	0.00908	0.1394					192	3972.67	99.99	2.13965	0.00926	2.13039
193	3970.95	99.95	0.21466	0.00953	0.20513					193	3973	100	0.68967	0.004	0.68567
194	3973	100	0.15046	0.00937	0.14109					194	3973	100	3.12618	0.00912	3.11706
195	3972.35	99.98	0.17945	0.00934	0.17011					195	3972.03	99.98	3.63176	0.00968	3.62208
196	3973	100	0.1389	0.00936	0.12954					196	3973	100	1.93663	0.0092	1.92743
197	3972.5	99.99	0.16057	0.00931	0.15126					197	3972.5	99.99	3.81425	0.00966	3.80459
198	3972.67	99.99	0.14921	0.00936	0.13985					198	3973	100	1.18485	0.0094	1.17545
199	3972.35	99.98	0.305	0.004	0.301					199	3972.67	99.99	1.70361	0.00929	1.69432
200	3973.01	100	0.11509	0.00933	0.10576					200	3971.46	99.96	2.19804	0.00919	2.18885

## Sheet: 05_EHCFACO_Seeds(111)
Fast Converegnce Exp							Fast Converegnce Exp			Slow Converegnce Exp							Slow Converegnce Exp
#	CBLF	Quality	Taumax	Taumin	DeltaTauminmax		Global Optimal Solution =	3973.01		#	CBLF	Quality	Taumax	Taumin	DeltaTauminmax		Global Optimal Solution =	3973.01
1	3968.47	99.89	0.10991	0.0097	0.10021		Minimum Optimal Solution=	3960.51		1	3972.35	99.98	2.10597	0.0097	2.09627		Minimum Optimal Solution =	3967.5
2	3972.35	99.98	0.12191	0.00915	0.11276		Mean of Optimal Solution =	3971.83		2	3972.67	99.99	3.77247	0.00946	3.76301		Mean of Optimal Solution =	3972.33
3	3972.5	99.99	0.13403	0.0089	0.12513		Median of Optimal Solution =	3971.83		3	3972.67	99.99	0.62379	0.00906	0.61473		Median of Optimal Solution =	3972.33
4	3971.98	99.97	0.10285	0.00973	0.09312		Solution Standrad Deviation=	1.7052		4	3971.98	99.97	2.05874	0.00932	2.04942		Solution Standrad Deviation =	0.90984
5	3972.5	99.99	0.22574	0.01002	0.21572		Average Price =	25.785		5	3972.35	99.98	3.51236	0.00909	3.50327		Average Price =	81.045
6	3972.67	99.99	0.1681	0.00939	0.15871		Relability =	93		6	3969.39	99.91	3.63636	0.00953	3.62683		Relability =	98.5
7	3973	100	0.08561	0.00923	0.07638		Normalized Price =	27.7258		7	3972.67	99.99	2.5839	0.00906	2.57484		Normalized Price =	82.2792
8	3972.67	99.99	0.10674	0.00939	0.09735		Average Solution Quality =	99.9702		8	3972.35	99.98	3.72714	0.00956	3.71758		Average Solution Quality =	99.9828
9	3971.98	99.97	0.24431	0.0095	0.23481		Average FDC =	-120.149		9	3972.35	99.98	1.58311	0.00954	1.57357		Average FDC =	-56.0272
10	3972.5	99.99	0.14255	0.00888	0.13367		Correlation Coefficent =	-0.69339		10	3972.5	99.99	2.56957	0.00921	2.56036		Correlation Coefficent =	-0.69396
11	3973	100	0.35505	0.00935	0.3457		Solution Robustness =	2329.18		11	3972.67	99.99	2.51726	0.00929	2.50797		Solution Robustness =	4365.96
12	3960.51	99.69	0.09513	0.00968	0.08545		Performance Rate =	0.036067		12	3973.01	100	0.90283	0.00886	0.89397		Performance Rate =	0.012154
13	3971.06	99.95	0.09465	0.00951	0.08514		Average Elapsed Time =	2.1173		13	3971.46	99.96	2.60522	0.00908	2.59614		Average Elapsed Time =	6.7967
14	3973.01	100	0.0985	0.00931	0.08919					14	3972.35	99.98	2.08034	0.00945	2.07089
15	3972.67	99.99	0.1451	0.00877	0.13633					15	3972.5	99.99	1.93429	0.00958	1.92471
16	3970.41	99.93	0.1468	0.00981	0.13699					16	3973	100	3.56759	0.00974	3.55785
17	3970.73	99.94	0.20222	0.00915	0.19307					17	3973	100	2.36923	0.00962	2.35961
18	3970.95	99.95	0.13064	0.00905	0.12159					18	3972.67	99.99	2.68858	0.00935	2.67923
19	3972.03	99.98	0.13066	0.00925	0.12141					19	3972.67	99.99	2.36737	0.00943	2.35794
20	3972.17	99.98	0.10217	0.00928	0.09289					20	3972.5	99.99	2.47813	0.00938	2.46875
21	3973	100	0.08052	0.00899	0.07153					21	3972.5	99.99	0.84655	0.00957	0.83698
22	3972.5	99.99	0.22906	0.00922	0.21984					22	3973	100	3.25696	0.00893	3.24803
23	3972.5	99.99	0.18044	0.00967	0.17077					23	3971.98	99.97	3.78308	0.0093	3.77378
24	3966.88	99.85	0.15837	0.00934	0.14903					24	3973.01	100	2.25531	0.00898	2.24633
25	3973	100	0.13997	0.0089	0.13107					25	3973.01	100	0.71767	0.00915	0.70852
26	3972.35	99.98	0.15662	0.0095	0.14712					26	3972.67	99.99	4.01517	0.00928	4.00589
27	3972.35	99.98	0.18015	0.00911	0.17104					27	3972.5	99.99	1.35088	0.00922	1.34166
28	3972.67	99.99	0.18226	0.00936	0.1729					28	3973	100	2.23215	0.00928	2.22287
29	3973	100	0.15735	0.00964	0.14771					29	3973	100	2.6926	0.00946	2.68314
30	3972.5	99.99	0.14715	0.00915	0.138					30	3972.67	99.99	3.01579	0.004	3.01179
31	3967.84	99.87	0.37726	0.00947	0.36779					31	3972.35	99.98	3.72577	0.00902	3.71675
32	3973	100	0.37902	0.00937	0.36965					32	3972.67	99.99	3.18507	0.00943	3.17564
33	3972.03	99.98	0.12214	0.00952	0.11262					33	3973.01	100	3.17696	0.00947	3.16749
34	3972.35	99.98	0.12705	0.00925	0.1178					34	3973	100	0.90103	0.00901	0.89202
35	3972.67	99.99	0.15242	0.00887	0.14355					35	3973	100	2.93065	0.004	2.92665
36	3972.35	99.98	0.08434	0.00937	0.07497					36	3972.67	99.99	1.8293	0.00931	1.81999
37	3972.67	99.99	0.15581	0.00904	0.14677					37	3972.03	99.98	3.53173	0.00941	3.52232
38	3973.01	100	0.13514	0.00934	0.1258					38	3970.73	99.94	3.54609	0.00943	3.53666
39	3970.41	99.93	0.089	0.00979	0.07921					39	3973	100	3.85342	0.00969	3.84373
40	3971.46	99.96	0.08962	0.0088	0.08082					40	3972.5	99.99	3.40069	0.00917	3.39152
41	3972.35	99.98	0.26395	0.00924	0.25471					41	3973	100	2.54963	0.00954	2.54009
42	3973	100	0.16768	0.0096	0.15808					42	3972.35	99.98	2.57745	0.00916	2.56829
43	3972.03	99.98	0.135	0.00921	0.12579					43	3972.5	99.99	2.1604	0.00954	2.15086
44	3971.98	99.97	0.23396	0.00947	0.22449					44	3972.67	99.99	0.81314	0.00917	0.80397
45	3971.46	99.96	0.13266	0.00955	0.12311					45	3971.46	99.96	4.10911	0.00875	4.10036
46	3972.67	99.99	0.20735	0.00934	0.19801					46	3971.98	99.97	3.21356	0.00949	3.20407
47	3972.5	99.99	0.15226	0.00958	0.14268					47	3972.67	99.99	0.86402	0.00906	0.85496
48	3970.73	99.94	0.15626	0.00875	0.14751					48	3972.67	99.99	2.09616	0.00971	2.08645
49	3972.67	99.99	0.10524	0.00932	0.09592					49	3972.35	99.98	3.53963	0.00932	3.53031
50	3963.62	99.76	0.13182	0.00919	0.12263					50	3972.35	99.98	3.01874	0.00929	3.00945
51	3973	100	0.06716	0.00941	0.05775					51	3972.5	99.99	2.09762	0.00927	2.08835
52	3972.67	99.99	0.17267	0.00961	0.16306					52	3967.5	99.86	2.51309	0.00972	2.50337
53	3970.73	99.94	0.12594	0.00933	0.11661					53	3973.01	100	3.03049	0.00966	3.02083
54	3972.35	99.98	0.14927	0.00906	0.14021					54	3972.67	99.99	5.78424	0.00951	5.77473
55	3973.01	100	0.1089	0.00918	0.09972					55	3973	100	3.01735	0.00935	3.008
56	3972.67	99.99	0.1059	0.00938	0.09652					56	3971.46	99.96	2.08658	0.00916	2.07742
57	3972.67	99.99	0.18126	0.00909	0.17217					57	3969.12	99.9	2.97818	0.00899	2.96919
58	3973	100	0.11561	0.00946	0.10615					58	3973	100	1.89738	0.00955	1.88783
59	3971.52	99.96	0.1147	0.00954	0.10516					59	3973	100	1.90316	0.00925	1.89391
60	3973.01	100	0.2372	0.00944	0.22776					60	3972.35	99.98	2.92131	0.00887	2.91244
61	3972.67	99.99	0.20432	0.00886	0.19546					61	3973.01	100	1.22337	0.00953	1.21384
62	3968.36	99.88	0.15233	0.00918	0.14315					62	3973.01	100	4.0039	0.00937	3.99453
63	3972.67	99.99	0.16109	0.00936	0.15173					63	3973	100	3.16281	0.00878	3.15403
64	3971.85	99.97	0.17904	0.00929	0.16975					64	3972.03	99.98	2.39245	0.0092	2.38325
65	3967.5	99.86	0.4069	0.00952	0.39738					65	3972.35	99.98	3.45215	0.00923	3.44292
66	3970.41	99.93	0.0929	0.0091	0.0838					66	3973	100	1.18815	0.00933	1.17882
67	3970.95	99.95	0.14604	0.00909	0.13695					67	3973	100	3.63946	0.00878	3.63068
68	3972.5	99.99	0.07995	0.00929	0.07066					68	3971.06	99.95	3.28923	0.00918	3.28005
69	3972.35	99.98	0.10647	0.00936	0.09711					69	3973	100	1.91394	0.00908	1.90486
70	3968.15	99.88	0.11845	0.00935	0.1091					70	3971.98	99.97	3.25452	0.00956	3.24496
71	3973	100	0.15702	0.00883	0.14819					71	3971.98	99.97	2.87292	0.00896	2.86396
72	3972.35	99.98	0.1033	0.00933	0.09397					72	3972.67	99.99	2.80482	0.004	2.80082
73	3970.09	99.93	0.12728	0.00919	0.11809					73	3972.5	99.99	2.28039	0.00932	2.27107
74	3972.5	99.99	0.15054	0.00941	0.14113					74	3972.35	99.98	2.00137	0.004	1.99737
75	3972.35	99.98	0.11833	0.0092	0.10913					75	3970.41	99.93	3.63515	0.00919	3.62596
76	3972.35	99.98	0.11012	0.00975	0.10037					76	3972.67	99.99	0.74908	0.00939	0.73969
77	3972.35	99.98	0.3062	0.00961	0.29659					77	3973	100	3.27735	0.00919	3.26816
78	3971.98	99.97	0.13056	0.00921	0.12135					78	3972.5	99.99	2.48086	0.00935	2.47151
79	3972.5	99.99	0.09392	0.00897	0.08495					79	3973	100	1.0473	0.00913	1.03817
80	3971.52	99.96	0.0978	0.00945	0.08835					80	3972.5	99.99	2.18967	0.00953	2.18014
81	3972.67	99.99	0.09879	0.00938	0.08941					81	3971.98	99.97	2.51683	0.00956	2.50727
82	3973.01	100	0.10142	0.00914	0.09228					82	3972.67	99.99	3.12322	0.00952	3.1137
83	3972.5	99.99	0.25926	0.00949	0.24977					83	3972.67	99.99	2.9062	0.0096	2.8966
84	3968.88	99.9	0.22149	0.00946	0.21203					84	3972.67	99.99	3.62055	0.00894	3.61161
85	3972.35	99.98	0.18546	0.00911	0.17635					85	3973.01	100	3.52791	0.00941	3.5185
86	3971.06	99.95	0.18833	0.00912	0.17921					86	3973	100	1.88174	0.00915	1.87259
87	3973	100	0.30616	0.00951	0.29665					87	3971.46	99.96	1.39631	0.0091	1.38721
88	3973.01	100	0.2107	0.00923	0.20147					88	3972.67	99.99	0.6888	0.00935	0.67945
89	3973	100	0.13269	0.00928	0.12341					89	3969.12	99.9	3.67217	0.0095	3.66267
90	3972.67	99.99	0.06819	0.00947	0.05872					90	3972.03	99.98	1.78678	0.00933	1.77745
91	3969.39	99.91	0.11449	0.004	0.11049					91	3972.35	99.98	2.62653	0.00909	2.61744
92	3972.67	99.99	0.18869	0.00939	0.1793					92	3972.67	99.99	3.06465	0.009	3.05565
93	3973	100	0.14043	0.00929	0.13114					93	3972.67	99.99	0.52349	0.00912	0.51437
94	3972.03	99.98	0.11991	0.00922	0.11069					94	3971.46	99.96	2.97052	0.00904	2.96148
95	3972.67	99.99	0.09364	0.00961	0.08403					95	3972.67	99.99	2.78564	0.00899	2.77665
96	3972.67	99.99	0.38787	0.00982	0.37805					96	3972.67	99.99	2.06549	0.00945	2.05604
97	3972.67	99.99	0.11497	0.00938	0.10559					97	3973.01	100	1.81686	0.00903	1.80783
98	3973	100	0.20718	0.00925	0.19793					98	3973.01	100	2.73457	0.00934	2.72523
99	3972.67	99.99	0.16356	0.00975	0.15381					99	3972.67	99.99	0.61082	0.0091	0.60172
100	3972.03	99.98	0.17187	0.00936	0.16251					100	3972.5	99.99	4.02331	0.009	4.01431
101	3972.67	99.99	0.10085	0.00933	0.09152					101	3973	100	3.59014	0.004	3.58614
102	3973	100	0.14514	0.00908	0.13606					102	3972.67	99.99	1.0381	0.00933	1.02877
103	3972.03	99.98	0.15234	0.00922	0.14312					103	3973.01	100	3.00025	0.00868	2.99157
104	3972.35	99.98	0.0903	0.00911	0.08119					104	3973	100	3.55499	0.00937	3.54562
105	3973	100	0.18246	0.00917	0.17329					105	3972.03	99.98	3.00365	0.00953	2.99412
106	3972.67	99.99	0.11356	0.00945	0.10411					106	3973	100	3.44926	0.00934	3.43992
107	3972.5	99.99	0.152	0.00937	0.14263					107	3973.01	100	3.07386	0.00957	3.06429
108	3972.35	99.98	0.16748	0.00953	0.15795					108	3973	100	0.97382	0.00929	0.96453
109	3973.01	100	0.10071	0.00907	0.09164					109	3967.5	99.86	3.64643	0.0094	3.63703
110	3972.67	99.99	0.13645	0.00916	0.12729					110	3972.67	99.99	1.8125	0.00913	1.80337
111	3971.46	99.96	0.17705	0.009	0.16805					111	3972.35	99.98	3.0638	0.00924	3.05456
112	3972.67	99.99	0.26637	0.00926	0.25711					112	3972.67	99.99	2.99155	0.00932	2.98223
113	3972.67	99.99	0.13004	0.00923	0.12081					113	3973.01	100	3.17935	0.0092	3.17015
114	3972.35	99.98	0.24857	0.00921	0.23936					114	3972.35	99.98	1.21292	0.00973	1.20319
115	3973	100	0.11509	0.00952	0.10557					115	3972.35	99.98	1.78725	0.00928	1.77797
116	3972.17	99.98	0.09796	0.00925	0.08871					116	3972.03	99.98	2.19948	0.00932	2.19016
117	3970.95	99.95	0.09369	0.0091	0.08459					117	3973	100	0.80499	0.00884	0.79615
118	3971.98	99.97	0.11071	0.00916	0.10155					118	3972.35	99.98	2.50438	0.00913	2.49525
119	3972.35	99.98	0.14372	0.00929	0.13443					119	3971.98	99.97	2.14219	0.00889	2.1333
120	3972.67	99.99	0.20392	0.00952	0.1944					120	3973	100	2.37946	0.00943	2.37003
121	3973.01	100	0.11872	0.0096	0.10912					121	3970.41	99.93	3.5113	0.00955	3.50175
122	3972.35	99.98	0.12703	0.00935	0.11768					122	3972.5	99.99	2.94231	0.00929	2.93302
123	3972.67	99.99	0.11909	0.00912	0.10997					123	3972.67	99.99	2.76446	0.00917	2.75529
124	3973	100	0.18836	0.00967	0.17869					124	3973.01	100	2.6952	0.00936	2.68584
125	3972.35	99.98	0.12415	0.00915	0.115					125	3972.5	99.99	2.19997	0.00917	2.1908
126	3973.01	100	0.18083	0.0091	0.17173					126	3973	100	2.98419	0.00983	2.97436
127	3972.5	99.99	0.14773	0.00923	0.1385					127	3972.67	99.99	2.00442	0.00933	1.99509
128	3972.35	99.98	0.14984	0.0094	0.14044					128	3972.35	99.98	3.79576	0.00899	3.78677
129	3972.03	99.98	0.17942	0.00955	0.16987					129	3973	100	2.64326	0.00991	2.63335
130	3973	100	0.17738	0.00914	0.16824					130	3972.67	99.99	1.44073	0.00927	1.43146
131	3970.23	99.93	0.09379	0.00947	0.08432					131	3972.67	99.99	2.20656	0.00952	2.19704
132	3971.98	99.97	0.25437	0.00906	0.24531					132	3972.67	99.99	2.43219	0.00967	2.42252
133	3973	100	0.19364	0.00927	0.18437					133	3973	100	2.97908	0.00962	2.96946
134	3970.41	99.93	0.1854	0.00969	0.17571					134	3972.35	99.98	1.51783	0.00926	1.50857
135	3973	100	0.20417	0.0096	0.19457					135	3972.67	99.99	2.44499	0.00938	2.43561
136	3971.98	99.97	0.14706	0.00898	0.13808					136	3971.06	99.95	2.33018	0.00923	2.32095
137	3972.5	99.99	0.07609	0.00951	0.06658					137	3972.67	99.99	0.53475	0.00951	0.52524
138	3970.73	99.94	0.14445	0.00912	0.13533					138	3972.35	99.98	2.63473	0.00915	2.62558
139	3972.67	99.99	0.16798	0.00976	0.15822					139	3972.03	99.98	3.80177	0.00947	3.7923
140	3969.58	99.91	0.09394	0.00965	0.08429					140	3973.01	100	2.88553	0.00927	2.87626
141	3973	100	0.14478	0.009	0.13578					141	3972.03	99.98	2.63658	0.0094	2.62718
142	3971.46	99.96	0.1369	0.00918	0.12772					142	3972.67	99.99	1.46068	0.00908	1.4516
143	3972.5	99.99	0.19648	0.00929	0.18719					143	3969.44	99.91	3.66181	0.00926	3.65255
144	3968.88	99.9	0.15768	0.00951	0.14817					144	3972.35	99.98	2.32104	0.00938	2.31166
145	3967.5	99.86	0.15188	0.00884	0.14304					145	3973	100	1.76217	0.00951	1.75266
146	3970.41	99.93	0.21496	0.00891	0.20605					146	3973	100	2.55581	0.00903	2.54678
147	3972.67	99.99	0.17543	0.00915	0.16628					147	3973	100	3.2012	0.00924	3.19196
148	3970.09	99.93	0.13507	0.00945	0.12562					148	3971.98	99.97	1.13138	0.00929	1.12209
149	3972.5	99.99	0.16131	0.00931	0.152					149	3972.5	99.99	1.86231	0.00932	1.85299
150	3972.35	99.98	0.19491	0.00884	0.18607					150	3973.01	100	1.86968	0.00945	1.86023
151	3973.01	100	0.23031	0.00942	0.22089					151	3972.67	99.99	2.20941	0.00936	2.20005
152	3972.35	99.98	0.09352	0.00932	0.0842					152	3971.46	99.96	3.51974	0.004	3.51574
153	3971.98	99.97	0.14062	0.00903	0.13159					153	3968.88	99.9	3.52598	0.00965	3.51633
154	3971.98	99.97	0.1218	0.00977	0.11203					154	3972.35	99.98	2.84676	0.00922	2.83754
155	3973	100	0.16965	0.00912	0.16053					155	3972.5	99.99	3.42083	0.00931	3.41152
156	3972.35	99.98	0.0893	0.00902	0.08028					156	3972.35	99.98	1.72742	0.00943	1.71799
157	3970.43	99.94	0.19369	0.0095	0.18419					157	3973	100	3.47807	0.00904	3.46903
158	3972.35	99.98	0.2497	0.00955	0.24015					158	3972.5	99.99	2.67579	0.00934	2.66645
159	3972.67	99.99	0.14541	0.00938	0.13603					159	3973	100	1.77457	0.00921	1.76536
160	3971.06	99.95	0.17945	0.00902	0.17043					160	3973	100	2.36604	0.00893	2.35711
161	3973	100	0.2212	0.00902	0.21218					161	3972.67	99.99	1.69029	0.00919	1.6811
162	3971.98	99.97	0.08394	0.00901	0.07493					162	3971.98	99.97	3.12373	0.00916	3.11457
163	3972.03	99.98	0.1094	0.00953	0.09987					163	3971.46	99.96	3.75433	0.009	3.74533
164	3970.09	99.93	0.11416	0.0094	0.10476					164	3973.01	100	3.09127	0.00876	3.08251
165	3972.5	99.99	0.1439	0.00942	0.13448					165	3971.98	99.97	2.66067	0.00931	2.65136
166	3968.8	99.89	0.09814	0.00955	0.08859					166	3971.98	99.97	3.97168	0.004	3.96768
167	3971.98	99.97	0.21824	0.00949	0.20875					167	3972.67	99.99	2.93352	0.00917	2.92435
168	3972.35	99.98	0.11032	0.00959	0.10073					168	3972.67	99.99	2.85388	0.0092	2.84468
169	3971.46	99.96	0.16734	0.00902	0.15832					169	3972.67	99.99	0.42057	0.00929	0.41128
170	3971.46	99.96	0.088	0.00935	0.07865					170	3972.35	99.98	2.19677	0.004	2.19277
171	3972.67	99.99	0.13609	0.00934	0.12675					171	3972.5	99.99	2.34954	0.0094	2.34014
172	3973	100	0.13147	0.00914	0.12233					172	3973	100	3.80052	0.00931	3.79121
173	3972.03	99.98	0.24517	0.00947	0.2357					173	3972.5	99.99	2.69264	0.00932	2.68332
174	3973.01	100	0.15408	0.00979	0.14429					174	3972.35	99.98	1.55955	0.00904	1.55051
175	3963.09	99.75	0.11508	0.00934	0.10574					175	3973	100	2.64038	0.00914	2.63124
176	3970.41	99.93	0.17576	0.00923	0.16653					176	3970.73	99.94	3.87781	0.00949	3.86832
177	3971.98	99.97	0.09046	0.004	0.08646					177	3971.46	99.96	0.94194	0.00891	0.93303
178	3970.09	99.93	0.14253	0.00919	0.13334					178	3972.67	99.99	2.19832	0.0092	2.18912
179	3969.12	99.9	0.16169	0.00899	0.1527					179	3971.98	99.97	3.75091	0.0092	3.74171
180	3972.5	99.99	0.13862	0.00918	0.12944					180	3972.5	99.99	2.78786	0.0092	2.77866
181	3972.67	99.99	0.08577	0.00887	0.0769					181	3972.35	99.98	3.49058	0.00916	3.48142
182	3972.35	99.98	0.13199	0.00926	0.12273					182	3970.41	99.93	3.72077	0.00921	3.71156
183	3972.03	99.98	0.17133	0.00893	0.1624					183	3971.98	99.97	3.22878	0.00949	3.21929
184	3972.35	99.98	0.13595	0.00935	0.1266					184	3972.35	99.98	2.4457	0.0095	2.4362
185	3972.67	99.99	0.11438	0.00924	0.10514					185	3972.03	99.98	2.61114	0.00912	2.60202
186	3971.46	99.96	0.17212	0.004	0.16812					186	3972.35	99.98	3.83265	0.00924	3.82341
187	3972.67	99.99	0.11367	0.00922	0.10445					187	3972.67	99.99	1.06393	0.00905	1.05488
188	3971.98	99.97	0.09722	0.00918	0.08804					188	3972.5	99.99	1.89468	0.004	1.89068
189	3972.35	99.98	0.14706	0.00892	0.13814					189	3973.01	100	1.67621	0.00883	1.66738
190	3972.35	99.98	0.08052	0.00938	0.07114					190	3970.09	99.93	3.57137	0.0091	3.56227
191	3973	100	0.10665	0.00931	0.09734					191	3971.06	99.95	1.7108	0.00917	1.70163
192	3972.35	99.98	0.16176	0.00908	0.15268					192	3971.98	99.97	3.15808	0.00945	3.14863
193	3970.73	99.94	0.10337	0.0096	0.09377					193	3972.35	99.98	3.65099	0.00892	3.64207
194	3972.35	99.98	0.07209	0.0095	0.06259					194	3972.35	99.98	1.06967	0.00875	1.06092
195	3972.35	99.98	0.06299	0.00927	0.05372					195	3972.5	99.99	1.95393	0.00973	1.9442
196	3973	100	0.11699	0.00922	0.10777					196	3971.98	99.97	3.4734	0.00906	3.46434
197	3970.41	99.93	0.13345	0.00907	0.12438					197	3972.35	99.98	2.38559	0.00928	2.37631
198	3973.01	100	0.08537	0.00917	0.0762					198	3972.67	99.99	2.56419	0.0091	2.55509
199	3972.67	99.99	0.10044	0.00983	0.09061					199	3970.41	99.93	2.86919	0.00916	2.86003
200	3968.8	99.89	0.16475	0.00942	0.15533					200	3972.67	99.99	2.37626	0.00888	2.36738

## Sheet: 06_EHCFACO_Seeds(200)
Fast Converegnce Exp							Fast Converegnce Exp			Slow Converegnce Exp							Slow Converegnce Exp
#	CBLF	Quality	Taumax	Taumin	DeltaTauminmax		Global Optimal Solution =	3973.01		#	CBLF	Quality	Taumax	Taumin	DeltaTauminmax		Global Optimal Solution =	3973.01
1	3972.5	99.99	0.17317	0.00921	0.16396		Minimum Optimal Solution =	3953.37		1	3972.5	99.99	2.97508	0.00921	2.96587		Minimum Optimal Solution =	3967.5
2	3972.67	99.99	0.22021	0.00923	0.21098		Mean of Optimal Solution =	3971.62		2	3973	100	3.88599	0.00913	3.87686		Mean of Optimal Solution =	3972.35
3	3965.78	99.82	0.12298	0.00909	0.11389		Median of Optimal Solution =	3971.62		3	3970.73	99.94	1.75857	0.00944	1.74913		Median of Optimal Solution =	3972.35
4	3970.41	99.93	0.33103	0.00895	0.32208		Solution Standrad Deviation =	2.1909		4	3973.01	100	1.32687	0.00971	1.31716		Solution Standrad Deviation =	0.83035
5	3971.7	99.97	0.12367	0.00907	0.1146		Average Price =	26.92		5	3971.46	99.96	3.44457	0.00912	3.43545		Average Price =	80.525
6	3973	100	0.09607	0.00928	0.08679		Relability =	92.5		6	3972.5	99.99	0.82254	0.00956	0.81298		Relability =	98
7	3972.67	99.99	0.13566	0.00951	0.12615		Normalized Price =	29.1027		7	3973	100	2.12323	0.00937	2.11386		Normalized Price =	82.1684
8	3972.67	99.99	0.07585	0.00909	0.06676		Average Solution Quality =	99.965		8	3973	100	0.78015	0.00973	0.77042		Average Solution Quality =	99.9833
9	3966.21	99.83	0.08845	0.00933	0.07912		Average FDC =	-127.974		9	3973.01	100	2.2879	0.00882	2.27908		Average FDC =	-56.0572
10	3972.35	99.98	0.12696	0.00951	0.11745		Correlation Coefficent =	-0.6902		10	3972.35	99.98	1.31138	0.00902	1.30236		Correlation Coefficent =	-0.68941
11	3971.98	99.97	0.20986	0.00949	0.20037		Solution Robustness =	1812.79		11	3972.67	99.99	2.3352	0.00946	2.32574		Solution Robustness =	4783.97
12	3970.41	99.93	0.08485	0.00926	0.07559		Performance Rate =	0.034361		12	3972.35	99.98	2.19068	0.00906	2.18162		Performance Rate =	0.01217
13	3972.35	99.98	0.11476	0.00941	0.10535		Average Elapsed Time =	2.1887		13	3972.35	99.98	1.55481	0.00922	1.54559		Average Elapsed Time =	6.7421
14	3973	100	0.19974	0.00939	0.19035					14	3972.35	99.98	2.18488	0.0093	2.17558
15	3972.5	99.99	0.0947	0.00917	0.08553					15	3973	100	2.31089	0.00912	2.30177
16	3972.17	99.98	0.10217	0.00913	0.09304					16	3972.03	99.98	2.07263	0.00898	2.06365
17	3973	100	0.16852	0.00931	0.15921					17	3972.35	99.98	2.80565	0.00939	2.79626
18	3971.46	99.96	0.20007	0.00925	0.19082					18	3972.67	99.99	3.27159	0.00961	3.26198
19	3972.5	99.99	0.11343	0.00896	0.10447					19	3971.06	99.95	3.49119	0.00963	3.48156
20	3972.35	99.98	0.17305	0.00968	0.16337					20	3970.41	99.93	2.19672	0.00931	2.18741
21	3971.46	99.96	0.28409	0.00927	0.27482					21	3972.5	99.99	2.57966	0.00953	2.57013
22	3973	100	0.11039	0.00937	0.10102					22	3972.67	99.99	2.47268	0.00925	2.46343
23	3971.46	99.96	0.11894	0.00966	0.10928					23	3972.35	99.98	1.80038	0.00966	1.79072
24	3973	100	0.12777	0.00917	0.1186					24	3972.35	99.98	3.03912	0.00933	3.02979
25	3972.5	99.99	0.25095	0.00916	0.24179					25	3972.35	99.98	3.64074	0.00937	3.63137
26	3972.35	99.98	0.30421	0.00926	0.29495					26	3973	100	2.13406	0.00872	2.12534
27	3968.88	99.9	0.27378	0.00938	0.2644					27	3971.46	99.96	2.6867	0.00949	2.67721
28	3971.98	99.97	0.22011	0.00944	0.21067					28	3972.67	99.99	1.55179	0.009	1.54279
29	3972.67	99.99	0.11007	0.00906	0.10101					29	3972.67	99.99	2.29199	0.00893	2.28306
30	3970.95	99.95	0.15796	0.00867	0.14929					30	3972.03	99.98	2.64984	0.00888	2.64096
31	3972.5	99.99	0.17404	0.00959	0.16445					31	3972.35	99.98	0.96761	0.00959	0.95802
32	3971.98	99.97	0.25837	0.00925	0.24912					32	3971.98	99.97	3.63937	0.00941	3.62996
33	3973	100	0.17662	0.00938	0.16724					33	3972.67	99.99	2.93383	0.00917	2.92466
34	3971.98	99.97	0.13197	0.00935	0.12262					34	3972.35	99.98	1.49522	0.00928	1.48594
35	3972.67	99.99	0.1397	0.00932	0.13038					35	3972.67	99.99	2.59448	0.00895	2.58553
36	3973.01	100	0.15136	0.0095	0.14186					36	3973	100	2.8695	0.00976	2.85974
37	3972.67	99.99	0.19358	0.00905	0.18453					37	3972.67	99.99	1.48279	0.00932	1.47347
38	3972.67	99.99	0.12721	0.00908	0.11813					38	3972.35	99.98	2.84524	0.00944	2.8358
39	3972.67	99.99	0.11528	0.00906	0.10622					39	3972.5	99.99	2.27226	0.00911	2.26315
40	3972.67	99.99	0.39121	0.00978	0.38143					40	3972.03	99.98	2.82241	0.00942	2.81299
41	3972.67	99.99	0.20201	0.00913	0.19288					41	3972.5	99.99	3.93095	0.00954	3.92141
42	3972.35	99.98	0.14909	0.00942	0.13967					42	3972.5	99.99	1.95087	0.00913	1.94174
43	3969.12	99.9	0.09194	0.004	0.08794					43	3972.67	99.99	3.16437	0.0093	3.15507
44	3973	100	0.08963	0.009	0.08063					44	3972.35	99.98	2.77686	0.00946	2.7674
45	3973.01	100	0.15046	0.00894	0.14152					45	3972.35	99.98	2.91115	0.00967	2.90148
46	3972.35	99.98	0.18751	0.00968	0.17783					46	3973	100	3.55265	0.00888	3.54377
47	3971.98	99.97	0.11873	0.00926	0.10947					47	3971.98	99.97	2.19812	0.00921	2.18891
48	3971.46	99.96	0.10545	0.00905	0.0964					48	3972.67	99.99	1.61992	0.00899	1.61093
49	3972.03	99.98	0.10588	0.0089	0.09698					49	3972.03	99.98	3.22817	0.00956	3.21861
50	3973.01	100	0.13901	0.004	0.13501					50	3972.35	99.98	3.38422	0.00911	3.37511
51	3973	100	0.15691	0.00908	0.14783					51	3972.35	99.98	2.54693	0.00903	2.5379
52	3973	100	0.1985	0.00946	0.18904					52	3971.06	99.95	2.90793	0.00897	2.89896
53	3973	100	0.13134	0.00955	0.12179					53	3973.01	100	3.55551	0.00931	3.5462
54	3973	100	0.11987	0.00944	0.11043					54	3972.03	99.98	3.60857	0.00949	3.59908
55	3972.67	99.99	0.29185	0.00926	0.28259					55	3973	100	1.58034	0.00928	1.57106
56	3971.98	99.97	0.11968	0.00944	0.11024					56	3973	100	1.84466	0.0091	1.83556
57	3971.46	99.96	0.11104	0.00909	0.10195					57	3972.35	99.98	4.00445	0.00938	3.99507
58	3973	100	0.11456	0.00937	0.10519					58	3972.35	99.98	2.57761	0.00919	2.56842
59	3973.01	100	0.08094	0.00974	0.0712					59	3973.01	100	3.28818	0.00916	3.27902
60	3973	100	0.1647	0.00936	0.15534					60	3973.01	100	4.06584	0.00926	4.05658
61	3972.35	99.98	0.15565	0.00963	0.14602					61	3972.5	99.99	2.70745	0.00892	2.69853
62	3972.35	99.98	0.11541	0.00916	0.10625					62	3972.67	99.99	1.1167	0.00946	1.10724
63	3972.35	99.98	0.1098	0.00915	0.10065					63	3972.35	99.98	0.74777	0.00942	0.73835
64	3972.67	99.99	0.10551	0.00936	0.09615					64	3972.35	99.98	3.54448	0.00932	3.53516
65	3972.67	99.99	0.25064	0.0093	0.24134					65	3972.67	99.99	1.89204	0.00937	1.88267
66	3967.2	99.85	0.14418	0.00926	0.13492					66	3972.35	99.98	2.89064	0.0089	2.88174
67	3971.06	99.95	0.22204	0.00953	0.21251					67	3972.35	99.98	3.89996	0.004	3.89596
68	3970.41	99.93	0.1349	0.00928	0.12562					68	3973.01	100	3.19252	0.00921	3.18331
69	3973	100	0.16383	0.004	0.15983					69	3973	100	3.79636	0.0091	3.78726
70	3971.98	99.97	0.24701	0.00951	0.2375					70	3972.35	99.98	2.58601	0.0094	2.57661
71	3972.35	99.98	0.12791	0.00904	0.11887					71	3972.35	99.98	1.32766	0.00917	1.31849
72	3972.67	99.99	0.1011	0.00957	0.09153					72	3968.8	99.89	3.34537	0.00944	3.33593
73	3966.53	99.84	0.07639	0.00898	0.06741					73	3973.01	100	3.05784	0.00934	3.0485
74	3973.01	100	0.15177	0.00926	0.14251					74	3973	100	2.21342	0.00937	2.20405
75	3972.67	99.99	0.19648	0.00941	0.18707					75	3972.35	99.98	2.56026	0.00944	2.55082
76	3972.35	99.98	0.14415	0.00947	0.13468					76	3972.5	99.99	0.83571	0.00928	0.82643
77	3966.53	99.84	0.07252	0.00951	0.06301					77	3972.67	99.99	2.06117	0.00958	2.05159
78	3973	100	0.26538	0.00874	0.25664					78	3971.46	99.96	2.04042	0.00935	2.03107
79	3973.01	100	0.27117	0.009	0.26217					79	3973.01	100	3.76987	0.00928	3.76059
80	3972.67	99.99	0.09839	0.00922	0.08917					80	3972.67	99.99	2.98299	0.004	2.97899
81	3972.67	99.99	0.08557	0.00913	0.07644					81	3972.67	99.99	3.47538	0.00937	3.46601
82	3967.18	99.85	0.07627	0.0092	0.06707					82	3973	100	3.57421	0.0095	3.56471
83	3971.98	99.97	0.13554	0.00941	0.12613					83	3972.35	99.98	2.72778	0.0092	2.71858
84	3972.35	99.98	0.12646	0.00936	0.1171					84	3972.03	99.98	1.07672	0.00931	1.06741
85	3972.67	99.99	0.13354	0.0095	0.12404					85	3972.35	99.98	3.29217	0.00924	3.28293
86	3973	100	0.11119	0.00925	0.10194					86	3972.67	99.99	2.49091	0.00899	2.48192
87	3972.67	99.99	0.10192	0.00902	0.0929					87	3972.35	99.98	2.22874	0.00952	2.21922
88	3971.06	99.95	0.09555	0.00922	0.08633					88	3972.35	99.98	1.45372	0.00934	1.44438
89	3972.35	99.98	0.1887	0.00971	0.17899					89	3972.67	99.99	2.34006	0.00945	2.33061
90	3972.35	99.98	0.20602	0.00907	0.19695					90	3972.67	99.99	2.5483	0.00973	2.53857
91	3972.67	99.99	0.09313	0.00971	0.08342					91	3972.35	99.98	3.48258	0.0092	3.47338
92	3972.5	99.99	0.10153	0.00963	0.0919					92	3973.01	100	3.30348	0.00926	3.29422
93	3973	100	0.1702	0.00933	0.16087					93	3972.35	99.98	1.52385	0.00953	1.51432
94	3972.03	99.98	0.09702	0.00912	0.0879					94	3972.35	99.98	3.10869	0.00935	3.09934
95	3972.35	99.98	0.12856	0.00951	0.11905					95	3973.01	100	3.04294	0.0095	3.03344
96	3972.03	99.98	0.17144	0.00974	0.1617					96	3973	100	1.26192	0.00958	1.25234
97	3969.12	99.9	0.12245	0.00985	0.1126					97	3973.01	100	2.11055	0.00896	2.10159
98	3971.46	99.96	0.08597	0.00941	0.07656					98	3972.5	99.99	2.62095	0.0089	2.61205
99	3968.36	99.88	0.17755	0.0093	0.16825					99	3973.01	100	2.58126	0.00929	2.57197
100	3970.43	99.94	0.11975	0.0096	0.11015					100	3971.46	99.96	1.03109	0.00907	1.02202
101	3970.73	99.94	0.11337	0.00899	0.10438					101	3972.5	99.99	2.46491	0.00911	2.4558
102	3960.86	99.69	0.09329	0.00938	0.08391					102	3973	100	3.2023	0.00907	3.19323
103	3970.41	99.93	0.07691	0.0093	0.06761					103	3968.88	99.9	3.61985	0.00953	3.61032
104	3969.39	99.91	0.23131	0.00911	0.2222					104	3973.01	100	3.62824	0.00926	3.61898
105	3973.01	100	0.14936	0.00911	0.14025					105	3972.35	99.98	2.952	0.00919	2.94281
106	3973	100	0.23476	0.00934	0.22542					106	3972.35	99.98	2.87552	0.00953	2.86599
107	3973	100	0.09773	0.00896	0.08877					107	3972.03	99.98	3.12888	0.00954	3.11934
108	3971.98	99.97	0.20031	0.00923	0.19108					108	3972.35	99.98	2.29288	0.00947	2.28341
109	3972.5	99.99	0.11163	0.00906	0.10257					109	3973	100	3.7021	0.00934	3.69276
110	3973	100	0.11062	0.00941	0.10121					110	3972.5	99.99	3.34848	0.00939	3.33909
111	3970.41	99.93	0.21934	0.00945	0.20989					111	3971.46	99.96	3.37183	0.00914	3.36269
112	3973.01	100	0.09789	0.00937	0.08852					112	3972.67	99.99	3.73589	0.00934	3.72655
113	3973.01	100	0.16934	0.00943	0.15991					113	3972.67	99.99	2.59511	0.00902	2.58609
114	3969.39	99.91	0.08026	0.004	0.07626					114	3972.67	99.99	1.98204	0.00965	1.97239
115	3970.95	99.95	0.11053	0.0098	0.10073					115	3973	100	3.32971	0.00962	3.32009
116	3972.35	99.98	0.10913	0.00955	0.09958					116	3973	100	3.79303	0.00936	3.78367
117	3972.67	99.99	0.20666	0.00923	0.19743					117	3972.67	99.99	3.71596	0.00935	3.70661
118	3968.88	99.9	0.12688	0.00924	0.11764					118	3972.67	99.99	2.93977	0.00921	2.93056
119	3973	100	0.14847	0.0093	0.13917					119	3971.98	99.97	3.29168	0.00949	3.28219
120	3972.67	99.99	0.21249	0.00896	0.20353					120	3973.01	100	2.58891	0.0091	2.57981
121	3972.35	99.98	0.16048	0.00957	0.15091					121	3972.35	99.98	2.39784	0.00942	2.38842
122	3971.98	99.97	0.18254	0.00897	0.17357					122	3972.5	99.99	2.2219	0.00937	2.21253
123	3969.12	99.9	0.07612	0.0094	0.06672					123	3972.5	99.99	0.44896	0.00921	0.43975
124	3973	100	0.21871	0.00916	0.20955					124	3973.01	100	3.06388	0.00909	3.05479
125	3971.98	99.97	0.1236	0.00948	0.11412					125	3972.67	99.99	0.98685	0.00959	0.97726
126	3970.43	99.94	0.09044	0.00905	0.08139					126	3973	100	2.94431	0.00949	2.93482
127	3973	100	0.22135	0.00892	0.21243					127	3972.35	99.98	2.78384	0.00936	2.77448
128	3973	100	0.08989	0.00935	0.08054					128	3972.67	99.99	0.8857	0.00952	0.87618
129	3972.67	99.99	0.15764	0.00899	0.14865					129	3973.01	100	2.13792	0.00895	2.12897
130	3973.01	100	0.17012	0.00929	0.16083					130	3972.35	99.98	3.22302	0.00987	3.21315
131	3968.5	99.89	0.07614	0.00904	0.0671					131	3971.46	99.96	2.7988	0.00959	2.78921
132	3965.24	99.8	0.07577	0.0092	0.06657					132	3972.35	99.98	3.27648	0.00914	3.26734
133	3972.35	99.98	0.15434	0.00912	0.14522					133	3971.98	99.97	3.01965	0.00964	3.01001
134	3973	100	0.15201	0.00984	0.14217					134	3973	100	2.86731	0.00926	2.85805
135	3973.01	100	0.13165	0.00919	0.12246					135	3971.06	99.95	3.56301	0.00934	3.55367
136	3970.09	99.93	0.11581	0.00915	0.10666					136	3973.01	100	0.58372	0.00923	0.57449
137	3969.44	99.91	0.2219	0.00928	0.21262					137	3972.35	99.98	1.14999	0.00901	1.14098
138	3970.41	99.93	0.12788	0.0099	0.11798					138	3973	100	3.14243	0.00966	3.13277
139	3971.52	99.96	0.08108	0.00937	0.07171					139	3967.5	99.86	4.12692	0.00968	4.11724
140	3972.03	99.98	0.16511	0.00964	0.15547					140	3972.67	99.99	4.12047	0.0091	4.11137
141	3969.91	99.92	0.09702	0.0093	0.08772					141	3972.67	99.99	1.5198	0.0092	1.5106
142	3972.35	99.98	0.20224	0.00944	0.1928					142	3972.5	99.99	2.92597	0.0093	2.91667
143	3972.67	99.99	0.13212	0.00896	0.12316					143	3973	100	3.5818	0.00942	3.57238
144	3972.35	99.98	0.29132	0.00941	0.28191					144	3972.5	99.99	2.02848	0.00921	2.01927
145	3972.67	99.99	0.14749	0.0091	0.13839					145	3972.35	99.98	2.65611	0.00947	2.64664
146	3973	100	0.13903	0.00915	0.12988					146	3973.01	100	1.71864	0.00908	1.70956
147	3971.46	99.96	0.20218	0.00935	0.19283					147	3972.67	99.99	4.35023	0.00947	4.34076
148	3973	100	0.22687	0.00944	0.21743					148	3972.35	99.98	3.1829	0.00992	3.17298
149	3970.73	99.94	0.13104	0.00903	0.12201					149	3972.5	99.99	2.24993	0.00934	2.24059
150	3973.01	100	0.18866	0.00933	0.17933					150	3971.98	99.97	3.44057	0.00957	3.431
151	3967.5	99.86	0.08536	0.00918	0.07618					151	3971.06	99.95	3.05808	0.00919	3.04889
152	3971.98	99.97	0.14448	0.0097	0.13478					152	3971.98	99.97	0.9387	0.00971	0.92899
153	3972.03	99.98	0.15625	0.00911	0.14714					153	3972.35	99.98	1.68035	0.00896	1.67139
154	3972.35	99.98	0.26059	0.00919	0.2514					154	3972.5	99.99	3.16822	0.004	3.16422
155	3971.98	99.97	0.1206	0.00901	0.11159					155	3973	100	3.03255	0.00996	3.02259
156	3972.35	99.98	0.15305	0.00919	0.14386					156	3973	100	3.69027	0.00931	3.68096
157	3971.46	99.96	0.20716	0.00907	0.19809					157	3973	100	2.46159	0.00994	2.45165
158	3970.43	99.94	0.07564	0.00997	0.06567					158	3972.35	99.98	3.21519	0.00952	3.20567
159	3972.03	99.98	0.21493	0.00954	0.20539					159	3973	100	2.61768	0.00965	2.60803
160	3972.35	99.98	0.13628	0.00898	0.1273					160	3972.67	99.99	4.22943	0.00907	4.22036
161	3973	100	0.18214	0.00976	0.17238					161	3971.06	99.95	4.02839	0.00951	4.01888
162	3953.37	99.51	0.1057	0.00968	0.09602					162	3971.46	99.96	0.98431	0.00896	0.97535
163	3971.46	99.96	0.14418	0.00889	0.13529					163	3971.98	99.97	2.4043	0.00946	2.39484
164	3971.38	99.96	0.10547	0.00902	0.09645					164	3973.01	100	3.22132	0.00924	3.21208
165	3972.35	99.98	0.2031	0.00892	0.19418					165	3971.98	99.97	1.92837	0.00957	1.9188
166	3972.5	99.99	0.12771	0.00884	0.11887					166	3968.88	99.9	0.45219	0.00934	0.44285
167	3972.5	99.99	0.11964	0.00947	0.11017					167	3972.67	99.99	2.43351	0.00889	2.42462
168	3969.12	99.9	0.09758	0.00927	0.08831					168	3973.01	100	3.35371	0.00954	3.34417
169	3969.12	99.9	0.12688	0.00949	0.11739					169	3973.01	100	1.8124	0.00975	1.80265
170	3972.35	99.98	0.09339	0.00937	0.08402					170	3969.12	99.9	3.35115	0.00951	3.34164
171	3970.09	99.93	0.15201	0.00956	0.14245					171	3972.67	99.99	3.03582	0.00954	3.02628
172	3972.03	99.98	0.12631	0.00937	0.11694					172	3972.35	99.98	2.99011	0.00943	2.98068
173	3972.03	99.98	0.16464	0.00938	0.15526					173	3971.98	99.97	1.43603	0.00933	1.4267
174	3972.67	99.99	0.21091	0.00945	0.20146					174	3972.5	99.99	1.42758	0.00939	1.41819
175	3972.03	99.98	0.19688	0.00935	0.18753					175	3973.01	100	1.45582	0.00882	1.447
176	3972.35	99.98	0.09645	0.00929	0.08716					176	3969.44	99.91	2.59726	0.00934	2.58792
177	3967.18	99.85	0.09341	0.00949	0.08392					177	3972.67	99.99	2.32316	0.00925	2.31391
178	3973.01	100	0.14032	0.00955	0.13077					178	3973	100	3.88783	0.00935	3.87848
179	3969.39	99.91	0.16401	0.00958	0.15443					179	3972.67	99.99	2.84008	0.00891	2.83117
180	3972.5	99.99	0.24434	0.00911	0.23523					180	3972.67	99.99	2.90413	0.00914	2.89499
181	3972.67	99.99	0.12386	0.00928	0.11458					181	3972.67	99.99	0.95328	0.00913	0.94415
182	3972.67	99.99	0.114	0.00879	0.10521					182	3972.67	99.99	2.26062	0.00917	2.25145
183	3970.09	99.93	0.13224	0.00886	0.12338					183	3973	100	2.32535	0.00981	2.31554
184	3973	100	0.17503	0.00954	0.16549					184	3973.01	100	1.96935	0.00931	1.96004
185	3973.01	100	0.09401	0.00925	0.08476					185	3971.46	99.96	2.63591	0.00913	2.62678
186	3973.01	100	0.19728	0.00906	0.18822					186	3973.01	100	1.52118	0.00938	1.5118
187	3973.01	100	0.1086	0.00897	0.09963					187	3971.98	99.97	2.4556	0.00913	2.44647
188	3971.46	99.96	0.09357	0.00927	0.0843					188	3972.67	99.99	3.04507	0.00916	3.03591
189	3972.03	99.98	0.10598	0.00931	0.09667					189	3972.35	99.98	3.29482	0.00927	3.28555
190	3973	100	0.18704	0.0092	0.17784					190	3972.03	99.98	2.34539	0.00906	2.33633
191	3971.46	99.96	0.16374	0.00906	0.15468					191	3971.98	99.97	2.81099	0.0095	2.80149
192	3973	100	0.22391	0.00919	0.21472					192	3970.73	99.94	1.98369	0.00895	1.97474
193	3972.35	99.98	0.17606	0.00928	0.16678					193	3973	100	3.12781	0.00961	3.1182
194	3972.03	99.98	0.09351	0.00936	0.08415					194	3972.67	99.99	1.02151	0.004	1.01751
195	3971.98	99.97	0.16104	0.00921	0.15183					195	3970.73	99.94	2.51096	0.00883	2.50213
196	3971.46	99.96	0.11692	0.00923	0.10769					196	3972.67	99.99	1.54696	0.00953	1.53743
197	3973	100	0.16875	0.00944	0.15931					197	3972.35	99.98	3.09603	0.00896	3.08707
198	3969.12	99.9	0.18169	0.0089	0.17279					198	3970.73	99.94	3.68668	0.004	3.68268
199	3969.44	99.91	0.14474	0.00938	0.13536					199	3972.67	99.99	2.57437	0.0091	2.56527
200	3973.01	100	0.20754	0.00919	0.19835					200	3972.5	99.99	1.17403	0.00939	1.16464

## Sheet: 07_EHCFACO_Seeds(167)
Fast Converegnce Exp							Fast Converegnce Exp			Slow Converegnce Exp							Slow Converegnce Exp
#	CBLF	Quality	Taumax	Taumin	DeltaTauminmax		Global Optimal Solution =	3973.01		#	CBLF	Quality	Taumax	Taumin	DeltaTauminmax		Global Optimal Solution =	3973.01
1	3972.67	99.99	0.13573	0.00942	0.12631		Minimum Optimal Solution =	3906.32		1	3972.67	99.99	3.27922	0.00942	3.2698		Minimum Optimal Solution =	3968.36
2	3973	100	0.09685	0.00925	0.0876		Mean of Optimal Solution =	3971.5		2	3970.73	99.94	2.99224	0.00917	2.98307		Mean of Optimal Solution =	3972.42
3	3972.5	99.99	0.23286	0.009	0.22386		Median of Optimal Solution=	3971.5		3	3971.98	99.97	3.10205	0.00927	3.09278		Median of Optimal Solution =	3972.42
4	3970.41	99.93	0.17956	0.00975	0.16981		Solution Standrad Deviation =	4.9202		4	3973	100	1.2968	0.00898	1.28782		Solution Standrad Deviation =	0.77196
5	3972.67	99.99	0.08538	0.00903	0.07635		Average Price =	26.34		5	3972.67	99.99	3.64391	0.00906	3.63485		Average Price =	80.785
6	3970.73	99.94	0.15862	0.00923	0.14939		Relability =	95		6	3972.67	99.99	3.60426	0.00878	3.59548		Relability =	99.5
7	3971.98	99.97	0.09369	0.00937	0.08432		Normalized Price =	27.7263		7	3972.35	99.98	3.92302	0.00894	3.91408		Normalized Price =	81.191
8	3970.41	99.93	0.1223	0.00933	0.11297		Average Solution Quality =	99.962		8	3972.67	99.99	2.39828	0.00925	2.38903		Average Solution Quality =	99.985
9	3972.35	99.98	0.13135	0.00933	0.12202		Average FDC =	-125.259		9	3972.5	99.99	3.79472	0.0098	3.78492		Average FDC =	-55.2933
10	3972.67	99.99	0.16001	0.00917	0.15084		Correlation Coefficent =	-0.69327		10	3972.5	99.99	1.32824	0.00927	1.31897		Correlation Coefficent =	-0.69944
11	3971.46	99.96	0.14876	0.00904	0.13972		Solution Robustness =	807.175		11	3972.67	99.99	2.84229	0.00925	2.83304		Solution Robustness =	5145.87
12	3972.35	99.98	0.17716	0.00947	0.16769		Performance Rate =	0.036067		12	3972.67	99.99	3.26492	0.00962	3.2553		Performance Rate =	0.012317
13	3972.35	99.98	0.21765	0.00935	0.2083		Average Elapsed Time =	2.1521		13	3971.98	99.97	2.89689	0.00906	2.88783		Average Elapsed Time =	6.8981
14	3970.73	99.94	0.25659	0.00968	0.24691					14	3973.01	100	3.62507	0.00931	3.61576
15	3973	100	0.23973	0.00945	0.23028					15	3972.35	99.98	1.33642	0.00934	1.32708
16	3970.73	99.94	0.13975	0.00916	0.13059					16	3972.03	99.98	2.60688	0.00907	2.59781
17	3972.67	99.99	0.13705	0.0092	0.12785					17	3971.98	99.97	2.07788	0.0091	2.06878
18	3970.09	99.93	0.12693	0.00953	0.1174					18	3973	100	2.29869	0.00959	2.2891
19	3971.98	99.97	0.13219	0.00946	0.12273					19	3972.67	99.99	3.07108	0.00919	3.06189
20	3972.35	99.98	0.06413	0.00929	0.05484					20	3970.41	99.93	4.22047	0.01005	4.21042
21	3972.67	99.99	0.13896	0.00894	0.13002					21	3972.35	99.98	2.95751	0.00932	2.94819
22	3972.03	99.98	0.11999	0.00938	0.11061					22	3972.5	99.99	2.808	0.00948	2.79852
23	3972.35	99.98	0.16922	0.00905	0.16017					23	3973	100	2.9728	0.0094	2.9634
24	3971.46	99.96	0.12016	0.00905	0.11111					24	3972.35	99.98	3.5486	0.00964	3.53896
25	3971.06	99.95	0.08873	0.00911	0.07962					25	3973	100	1.70941	0.00918	1.70023
26	3971.98	99.97	0.12969	0.00945	0.12024					26	3972.5	99.99	1.40667	0.00924	1.39743
27	3973.01	100	0.23794	0.00944	0.2285					27	3973	100	3.43291	0.004	3.42891
28	3972.67	99.99	0.12251	0.00965	0.11286					28	3973.01	100	2.2168	0.00943	2.20737
29	3966.35	99.83	0.099	0.00905	0.08995					29	3972.03	99.98	2.99332	0.00923	2.98409
30	3971.46	99.96	0.12485	0.00935	0.1155					30	3972.67	99.99	2.66464	0.00932	2.65532
31	3973	100	0.17516	0.00928	0.16588					31	3973	100	2.87627	0.00952	2.86675
32	3972.67	99.99	0.12269	0.00935	0.11334					32	3972.67	99.99	2.91752	0.0096	2.90792
33	3972.67	99.99	0.21058	0.00949	0.20109					33	3971.98	99.97	2.53009	0.0096	2.52049
34	3971.7	99.97	0.13792	0.00931	0.12861					34	3972.67	99.99	3.26782	0.00951	3.25831
35	3972.5	99.99	0.11924	0.0088	0.11044					35	3972.5	99.99	1.90384	0.00943	1.89441
36	3966.29	99.83	0.15689	0.00906	0.14783					36	3972.5	99.99	2.47482	0.00932	2.4655
37	3973.01	100	0.32274	0.00974	0.313					37	3973.01	100	2.12236	0.004	2.11836
38	3973.01	100	0.10712	0.00928	0.09784					38	3973.01	100	2.00748	0.00896	1.99852
39	3973	100	0.13609	0.0093	0.12679					39	3972.35	99.98	3.24828	0.00926	3.23902
40	3973.01	100	0.0847	0.00948	0.07522					40	3973	100	3.02097	0.00929	3.01168
41	3972.67	99.99	0.14097	0.00945	0.13152					41	3973.01	100	2.47727	0.00887	2.4684
42	3972.67	99.99	0.25647	0.00913	0.24734					42	3973.01	100	3.45657	0.00894	3.44763
43	3972.35	99.98	0.11007	0.00936	0.10071					43	3972.67	99.99	3.15248	0.00902	3.14346
44	3972.5	99.99	0.12279	0.00932	0.11347					44	3973	100	3.53225	0.00885	3.5234
45	3972.5	99.99	0.20812	0.00936	0.19876					45	3973	100	2.88889	0.00947	2.87942
46	3972.03	99.98	0.114	0.00928	0.10472					46	3971.98	99.97	3.69356	0.00904	3.68452
47	3970.73	99.94	0.1096	0.004	0.1056					47	3972.5	99.99	0.53898	0.00933	0.52965
48	3972.67	99.99	0.16308	0.0095	0.15358					48	3973	100	1.46082	0.00898	1.45184
49	3971.52	99.96	0.14452	0.0091	0.13542					49	3972.5	99.99	2.92138	0.00929	2.91209
50	3972.67	99.99	0.0841	0.0095	0.0746					50	3970.09	99.93	4.48352	0.00952	4.474
51	3969.12	99.9	0.13479	0.00967	0.12512					51	3973	100	2.48082	0.00938	2.47144
52	3965.78	99.82	0.23011	0.00914	0.22097					52	3972.35	99.98	3.97733	0.00914	3.96819
53	3971.98	99.97	0.11993	0.00927	0.11066					53	3972.67	99.99	1.46685	0.00936	1.45749
54	3972.67	99.99	0.20444	0.00942	0.19502					54	3973	100	1.9679	0.00902	1.95888
55	3973	100	0.10138	0.00949	0.09189					55	3973	100	1.7844	0.00905	1.77535
56	3970.73	99.94	0.10201	0.00932	0.09269					56	3972.67	99.99	3.06031	0.00921	3.0511
57	3973.01	100	0.32279	0.00902	0.31377					57	3973.01	100	2.66248	0.00941	2.65307
58	3972.67	99.99	0.28449	0.00905	0.27544					58	3972.35	99.98	2.22211	0.00894	2.21317
59	3972.5	99.99	0.13509	0.00928	0.12581					59	3973	100	3.45191	0.00922	3.44269
60	3972.35	99.98	0.28279	0.00929	0.2735					60	3971.98	99.97	2.00139	0.00956	1.99183
61	3972.67	99.99	0.21413	0.00927	0.20486					61	3972.67	99.99	3.81068	0.0095	3.80118
62	3973	100	0.12673	0.00949	0.11724					62	3971.46	99.96	3.62508	0.01034	3.61474
63	3973.01	100	0.16728	0.00939	0.15789					63	3972.67	99.99	4.21823	0.00933	4.2089
64	3973	100	0.17633	0.00916	0.16717					64	3972.5	99.99	2.14133	0.00924	2.13209
65	3972.03	99.98	0.17012	0.00923	0.16089					65	3971.98	99.97	3.03709	0.00916	3.02793
66	3972.67	99.99	0.08401	0.00961	0.0744					66	3972.5	99.99	2.39766	0.00961	2.38805
67	3970.09	99.93	0.13876	0.0093	0.12946					67	3969.44	99.91	3.85661	0.00942	3.84719
68	3972.67	99.99	0.14697	0.00953	0.13744					68	3973	100	3.02073	0.00926	3.01147
69	3972.35	99.98	0.1858	0.00913	0.17667					69	3972.5	99.99	0.95447	0.00869	0.94578
70	3973.01	100	0.15549	0.00953	0.14596					70	3972.35	99.98	3.27883	0.0094	3.26943
71	3966.86	99.85	0.1681	0.00973	0.15837					71	3970.73	99.94	3.68515	0.00935	3.6758
72	3970.73	99.94	0.10533	0.0093	0.09603					72	3973	100	3.58677	0.00942	3.57735
73	3970.43	99.94	0.12254	0.00935	0.11319					73	3973	100	2.46279	0.0092	2.45359
74	3972.67	99.99	0.21993	0.00965	0.21028					74	3972.67	99.99	2.85484	0.00918	2.84566
75	3972.35	99.98	0.081	0.0095	0.0715					75	3972.67	99.99	2.93196	0.00969	2.92227
76	3972.67	99.99	0.13389	0.00969	0.1242					76	3973	100	1.85048	0.00929	1.84119
77	3972.5	99.99	0.17193	0.00919	0.16274					77	3973.01	100	2.51187	0.00891	2.50296
78	3973	100	0.11337	0.00924	0.10413					78	3972.67	99.99	2.71601	0.00898	2.70703
79	3973	100	0.16011	0.00929	0.15082					79	3973.01	100	0.52975	0.0088	0.52095
80	3973	100	0.18135	0.00926	0.17209					80	3972.67	99.99	4.44515	0.00961	4.43554
81	3972.67	99.99	0.12341	0.00936	0.11405					81	3973	100	3.0367	0.00903	3.02767
82	3972.03	99.98	0.09319	0.00923	0.08396					82	3972.67	99.99	2.82956	0.00928	2.82028
83	3973	100	0.17336	0.00937	0.16399					83	3972.35	99.98	3.45452	0.00927	3.44525
84	3972.03	99.98	0.13008	0.00919	0.12089					84	3973	100	3.26068	0.0095	3.25118
85	3972.35	99.98	0.10728	0.00904	0.09824					85	3971.98	99.97	3.90725	0.00926	3.89799
86	3972.67	99.99	0.27067	0.00931	0.26136					86	3972.5	99.99	2.2058	0.00939	2.19641
87	3971.98	99.97	0.21763	0.00911	0.20852					87	3972.5	99.99	2.53137	0.00988	2.52149
88	3971.98	99.97	0.12606	0.00951	0.11655					88	3973.01	100	2.47249	0.00944	2.46305
89	3970.41	99.93	0.11878	0.00937	0.10941					89	3973	100	3.19265	0.0095	3.18315
90	3972.17	99.98	0.12381	0.00947	0.11434					90	3972.35	99.98	2.0282	0.00925	2.01895
91	3972.03	99.98	0.10214	0.00897	0.09317					91	3973	100	3.18224	0.00977	3.17247
92	3972.17	99.98	0.09932	0.00905	0.09027					92	3970.41	99.93	3.92741	0.00948	3.91793
93	3968.8	99.89	0.08458	0.00964	0.07494					93	3973	100	2.01841	0.009	2.00941
94	3971.98	99.97	0.30392	0.00943	0.29449					94	3973.01	100	3.37149	0.00946	3.36203
95	3972.35	99.98	0.11982	0.00899	0.11083					95	3973	100	3.72478	0.00942	3.71536
96	3971.06	99.95	0.18791	0.0095	0.17841					96	3973.01	100	1.43791	0.00916	1.42875
97	3959.57	99.66	0.07776	0.00919	0.06857					97	3973.01	100	3.62141	0.00949	3.61192
98	3972.03	99.98	0.1597	0.00961	0.15009					98	3972.5	99.99	2.55598	0.00928	2.5467
99	3972.03	99.98	0.14496	0.00937	0.13559					99	3972.67	99.99	3.76485	0.00937	3.75548
100	3973.01	100	0.18104	0.00906	0.17198					100	3973.01	100	0.56199	0.00944	0.55255
101	3968.88	99.9	0.22316	0.00925	0.21391					101	3969.39	99.91	3.15152	0.00949	3.14203
102	3971.46	99.96	0.27011	0.00926	0.26085					102	3973	100	2.06235	0.00889	2.05346
103	3973	100	0.13277	0.00922	0.12355					103	3973	100	3.45048	0.00918	3.4413
104	3972.5	99.99	0.16874	0.00911	0.15963					104	3972.35	99.98	2.94822	0.00931	2.93891
105	3972.67	99.99	0.15321	0.00901	0.1442					105	3972.67	99.99	2.60561	0.00926	2.59635
106	3970.41	99.93	0.16487	0.00917	0.1557					106	3972.67	99.99	3.69186	0.00959	3.68227
107	3972.35	99.98	0.11501	0.00913	0.10588					107	3973.01	100	0.61948	0.00921	0.61027
108	3972.35	99.98	0.16024	0.00932	0.15092					108	3971.98	99.97	3.76666	0.00931	3.75735
109	3972.67	99.99	0.09417	0.00959	0.08458					109	3971.46	99.96	3.59798	0.009	3.58898
110	3973	100	0.153	0.00902	0.14398					110	3971.06	99.95	2.64884	0.00967	2.63917
111	3973	100	0.14292	0.0093	0.13362					111	3972.5	99.99	0.57607	0.00938	0.56669
112	3970.41	99.93	0.18036	0.00959	0.17077					112	3972.67	99.99	3.15762	0.00918	3.14844
113	3972.35	99.98	0.11103	0.00888	0.10215					113	3973	100	3.6861	0.00902	3.67708
114	3971.98	99.97	0.19323	0.00938	0.18385					114	3972.67	99.99	3.17213	0.00929	3.16284
115	3972.5	99.99	0.07643	0.00913	0.0673					115	3972.67	99.99	3.75336	0.00934	3.74402
116	3972.5	99.99	0.2131	0.00955	0.20355					116	3973	100	3.44203	0.00975	3.43228
117	3972.67	99.99	0.13556	0.00936	0.1262					117	3972.67	99.99	2.44156	0.00932	2.43224
118	3972.67	99.99	0.19988	0.00925	0.19063					118	3973	100	3.35967	0.009	3.35067
119	3973.01	100	0.07254	0.00894	0.0636					119	3972.5	99.99	1.53189	0.00915	1.52274
120	3970.41	99.93	0.15694	0.0094	0.14754					120	3973	100	2.21455	0.00922	2.20533
121	3972.35	99.98	0.08921	0.00902	0.08019					121	3971.98	99.97	3.05705	0.00921	3.04784
122	3972.67	99.99	0.16815	0.0096	0.15855					122	3973	100	0.47557	0.00945	0.46612
123	3970.09	99.93	0.20492	0.00922	0.1957					123	3972.35	99.98	2.61239	0.00969	2.6027
124	3972.67	99.99	0.15292	0.00932	0.1436					124	3972.35	99.98	1.05652	0.00884	1.04768
125	3972.5	99.99	0.1008	0.00867	0.09213					125	3972.35	99.98	1.49729	0.00941	1.48788
126	3973	100	0.13636	0.00936	0.127					126	3971.06	99.95	2.66149	0.00893	2.65256
127	3906.32	98.32	0.06373	0.00915	0.05458					127	3970.73	99.94	3.42264	0.00961	3.41303
128	3972.5	99.99	0.15685	0.00907	0.14778					128	3972.5	99.99	3.50244	0.00905	3.49339
129	3972.35	99.98	0.16774	0.00987	0.15787					129	3971.98	99.97	1.65565	0.00945	1.6462
130	3971.46	99.96	0.1055	0.00894	0.09656					130	3972.35	99.98	2.94004	0.00902	2.93102
131	3971.98	99.97	0.07669	0.00953	0.06716					131	3972.03	99.98	2.20311	0.00951	2.1936
132	3972.67	99.99	0.16918	0.00938	0.1598					132	3972.35	99.98	2.30642	0.00954	2.29688
133	3964.41	99.78	0.06242	0.00889	0.05353					133	3972.67	99.99	0.95364	0.00899	0.94465
134	3973.01	100	0.23518	0.00974	0.22544					134	3972.67	99.99	2.14616	0.00917	2.13699
135	3965.7	99.82	0.08214	0.00921	0.07293					135	3973	100	3.02221	0.00943	3.01278
136	3973.01	100	0.15298	0.00927	0.14371					136	3973.01	100	2.91045	0.00947	2.90098
137	3970.73	99.94	0.16436	0.00965	0.15471					137	3972.5	99.99	2.68625	0.00943	2.67682
138	3972.67	99.99	0.24569	0.00974	0.23595					138	3972.35	99.98	1.96466	0.00927	1.95539
139	3970.41	99.93	0.1324	0.00915	0.12325					139	3973	100	3.34407	0.00932	3.33475
140	3971.98	99.97	0.14974	0.00953	0.14021					140	3973.01	100	1.83412	0.00967	1.82445
141	3972.35	99.98	0.19783	0.00904	0.18879					141	3972.67	99.99	2.44246	0.00941	2.43305
142	3972.35	99.98	0.09324	0.00915	0.08409					142	3973	100	1.49891	0.0092	1.48971
143	3971.98	99.97	0.1407	0.00941	0.13129					143	3972.67	99.99	1.05635	0.00905	1.0473
144	3970.73	99.94	0.07194	0.004	0.06794					144	3972.35	99.98	1.25826	0.00924	1.24902
145	3973.01	100	0.16039	0.009	0.15139					145	3972.67	99.99	3.75417	0.00931	3.74486
146	3971.98	99.97	0.18755	0.00897	0.17858					146	3972.5	99.99	3.42405	0.0092	3.41485
147	3973	100	0.13984	0.00946	0.13038					147	3972.35	99.98	2.60368	0.00892	2.59476
148	3972.35	99.98	0.18942	0.00954	0.17988					148	3972.35	99.98	1.82064	0.00961	1.81103
149	3972.35	99.98	0.09777	0.009	0.08877					149	3972.35	99.98	0.86846	0.00939	0.85907
150	3970.73	99.94	0.10612	0.00917	0.09695					150	3972.67	99.99	1.95878	0.00886	1.94992
151	3970.41	99.93	0.12695	0.00902	0.11793					151	3971.98	99.97	2.25587	0.00927	2.2466
152	3972.67	99.99	0.10178	0.00925	0.09253					152	3972.67	99.99	2.88668	0.00913	2.87755
153	3971.46	99.96	0.08195	0.00922	0.07273					153	3972.67	99.99	2.43183	0.00923	2.4226
154	3970.43	99.94	0.1568	0.00957	0.14723					154	3968.36	99.88	2.58889	0.00913	2.57976
155	3970.09	99.93	0.08122	0.00905	0.07217					155	3973.01	100	1.95583	0.00905	1.94678
156	3973	100	0.15627	0.00943	0.14684					156	3972.35	99.98	1.25109	0.00909	1.242
157	3972.35	99.98	0.15587	0.00948	0.14639					157	3972.67	99.99	2.93753	0.00926	2.92827
158	3973.01	100	0.14979	0.009	0.14079					158	3972.35	99.98	4.13763	0.0093	4.12833
159	3973	100	0.18996	0.00913	0.18083					159	3971.98	99.97	3.21496	0.00894	3.20602
160	3971.98	99.97	0.28399	0.00967	0.27432					160	3972.03	99.98	2.56075	0.00903	2.55172
161	3972.67	99.99	0.14663	0.00924	0.13739					161	3972.67	99.99	2.8624	0.00924	2.85316
162	3973	100	0.12695	0.00899	0.11796					162	3972.35	99.98	2.82056	0.00904	2.81152
163	3972.35	99.98	0.0925	0.0096	0.0829					163	3972.35	99.98	3.65678	0.00902	3.64776
164	3973.01	100	0.25432	0.00911	0.24521					164	3972.5	99.99	2.50152	0.00934	2.49218
165	3972.35	99.98	0.18449	0.00961	0.17488					165	3970.73	99.94	3.55773	0.00945	3.54828
166	3972.03	99.98	0.20833	0.00904	0.19929					166	3972.5	99.99	2.54079	0.00873	2.53206
167	3971.98	99.97	0.07199	0.00934	0.06265					167	3972.35	99.98	2.86709	0.00938	2.85771
168	3970.41	99.93	0.13955	0.0097	0.12985					168	3970.41	99.93	3.953	0.00948	3.94352
169	3970.41	99.93	0.12273	0.00916	0.11357					169	3972.03	99.98	2.15739	0.00984	2.14755
170	3972.35	99.98	0.46092	0.00926	0.45166					170	3973.01	100	3.93529	0.00896	3.92633
171	3972.67	99.99	0.1231	0.00975	0.11335					171	3971.98	99.97	2.54533	0.00937	2.53596
172	3972.67	99.99	0.0934	0.00932	0.08408					172	3971.98	99.97	2.46899	0.00946	2.45953
173	3973.01	100	0.13312	0.00919	0.12393					173	3971.46	99.96	2.13754	0.00946	2.12808
174	3971.46	99.96	0.08471	0.00912	0.07559					174	3971.98	99.97	0.99529	0.00908	0.98621
175	3970.95	99.95	0.15123	0.00907	0.14216					175	3972.67	99.99	2.98392	0.0089	2.97502
176	3973	100	0.13612	0.00953	0.12659					176	3969.12	99.9	2.81933	0.00958	2.80975
177	3972.35	99.98	0.11376	0.00903	0.10473					177	3972.67	99.99	1.16868	0.00914	1.15954
178	3970.09	99.93	0.09664	0.00965	0.08699					178	3972.67	99.99	0.93275	0.0093	0.92345
179	3972.5	99.99	0.23971	0.0099	0.22981					179	3972.35	99.98	1.70049	0.00934	1.69115
180	3971.46	99.96	0.12955	0.00941	0.12014					180	3972.67	99.99	0.63179	0.00948	0.62231
181	3972.5	99.99	0.16501	0.00913	0.15588					181	3973	100	3.38575	0.00915	3.3766
182	3972.49	99.99	0.08111	0.00955	0.07156					182	3972.67	99.99	1.52685	0.00913	1.51772
183	3969.39	99.91	0.11461	0.00946	0.10515					183	3973	100	2.43611	0.0094	2.42671
184	3972.35	99.98	0.16525	0.00946	0.15579					184	3972.67	99.99	3.71627	0.00961	3.70666
185	3971.98	99.97	0.11449	0.00957	0.10492					185	3972.35	99.98	3.54558	0.00897	3.53661
186	3972.35	99.98	0.11995	0.00899	0.11096					186	3972.67	99.99	2.17106	0.00921	2.16185
187	3972.35	99.98	0.19512	0.0095	0.18562					187	3972.67	99.99	1.90459	0.00923	1.89536
188	3972.03	99.98	0.13283	0.00927	0.12356					188	3972.67	99.99	1.27931	0.00935	1.26996
189	3970.09	99.93	0.16767	0.00935	0.15832					189	3972.35	99.98	2.79406	0.00953	2.78453
190	3972.5	99.99	0.14477	0.00887	0.1359					190	3973.01	100	1.49058	0.00917	1.48141
191	3972.35	99.98	0.09933	0.00929	0.09004					191	3972.35	99.98	2.39398	0.00938	2.3846
192	3973	100	0.11939	0.00968	0.10971					192	3972.5	99.99	2.92939	0.00906	2.92033
193	3972.67	99.99	0.16091	0.00958	0.15133					193	3972.67	99.99	1.85819	0.00942	1.84877
194	3973.01	100	0.1555	0.00947	0.14603					194	3972.5	99.99	1.00259	0.00908	0.99351
195	3973	100	0.20454	0.00908	0.19546					195	3973	100	1.61047	0.00921	1.60126
196	3972.35	99.98	0.11838	0.00924	0.10914					196	3972.35	99.98	0.67152	0.0094	0.66212
197	3970.73	99.94	0.14845	0.0096	0.13885					197	3969.12	99.9	3.00507	0.00949	2.99558
198	3972.35	99.98	0.12265	0.00894	0.11371					198	3972.67	99.99	2.4459	0.00971	2.43619
199	3970.41	99.93	0.18174	0.00936	0.17238					199	3973	100	2.26269	0.00945	2.25324
200	3971.46	99.96	0.14306	0.00936						200	3972.35	99.98	1.64568	0.00906	1.63662

## Sheet: 08_EHCFACO_Seeds(225)
Fast Converegnce Exp							Fast Converegnce Exp			Slow Converegnce Exp							Slow Converegnce Exp
#	CBLF	Quality	Taumax	Taumin	DeltaTauminmax		Global Optimal Solution =	3973.01		#	CBLF	Quality	Taumax	Taumin	DeltaTauminmax		Global Optimal Solution =	3973.01
1	3967.33	99.86	0.07223	0.00921	0.06302		Minimum Optimal Solution =	3961.36		1	3973	100	3.08496	0.00921	3.07575		Minimum Optimal Solution =	3967.18
2	3972.03	99.98	0.11489	0.00942	0.10547		Mean of Optimal Solution =	3971.55		2	3972.67	99.99	3.47714	0.00947	3.46767		Mean of Optimal Solution =	3972.35
3	3972.35	99.98	0.2519	0.00927	0.24263		Median of Optimal Solution=	3971.55		3	3972.5	99.99	0.78641	0.00936	0.77705		Median of Optimal Solution =	3972.35
4	3972.5	99.99	0.11623	0.00948	0.10675		Solution Standrad Deviation =	2.2698		4	3972.35	99.98	2.73602	0.00902	2.727		Solution Standrad Deviation =	0.91767
5	3973	100	0.08078	0.00901	0.07177		Average Price =	25.765		5	3972.35	99.98	3.86554	0.00927	3.85627		Average Price =	80.57
6	3973.01	100	0.17402	0.00922	0.1648		Relability =	88.5		6	3973	100	1.69985	0.0093	1.69055		Relability =	99
7	3973	100	0.08427	0.00958	0.07469		Normalized Price =	29.113		7	3972.67	99.99	1.82782	0.0096	1.81822		Normalized Price =	81.3838
8	3968.88	99.9	0.08054	0.00909	0.07145		Average Solution Quality =	99.9634		8	3973	100	2.563	0.00967	2.55333		Average Solution Quality =	99.9834
9	3970.73	99.94	0.13182	0.00917	0.12265		Average FDC =	-135.35		9	3973.01	100	3.10117	0.00944	3.09173		Average FDC =	-54.9714
10	3962.16	99.73	0.15247	0.00954	0.14293		Correlation Coefficent =	-0.69315		10	3972.5	99.99	3.80972	0.00958	3.80014		Correlation Coefficent =	-0.69074
11	3973	100	0.1315	0.00921	0.12229		Solution Robustness =	1749.72		11	3973.01	100	3.68248	0.00941	3.67307		Solution Robustness =	4328.73
12	3973	100	0.18896	0.00929	0.17967		Performance Rate =	0.034349		12	3972.67	99.99	2.79681	0.0093	2.78751		Performance Rate =	0.012287
13	3972.35	99.98	0.07618	0.00944	0.06674		Average Elapsed Time =	2.0935		13	3972.35	99.98	3.16871	0.00955	3.15916		Average Elapsed Time =	7.9533
14	3973.01	100	0.11984	0.00937	0.11047					14	3973	100	2.96838	0.00929	2.95909
15	3973	100	0.241	0.00936	0.23164					15	3972.5	99.99	3.61373	0.004	3.60973
16	3968.8	99.89	0.13606	0.00901	0.12705					16	3973	100	3.18314	0.00946	3.17368
17	3972.35	99.98	0.13539	0.00897	0.12642					17	3972.5	99.99	0.89614	0.00918	0.88696
18	3972.67	99.99	0.155	0.0092	0.1458					18	3972.67	99.99	3.46022	0.004	3.45622
19	3972.03	99.98	0.16992	0.0092	0.16072					19	3973.01	100	3.28792	0.00904	3.27888
20	3973.01	100	0.10652	0.00931	0.09721					20	3973	100	1.93364	0.00896	1.92468
21	3973	100	0.1368	0.00944	0.12736					21	3973.01	100	1.90696	0.00907	1.89789
22	3973.01	100	0.15283	0.00902	0.14381					22	3972.03	99.98	2.62211	0.00914	2.61297
23	3973.01	100	0.10619	0.00916	0.09703					23	3973.01	100	1.48944	0.00936	1.48008
24	3968.36	99.88	0.18297	0.0096	0.17337					24	3972.67	99.99	3.41502	0.00905	3.40597
25	3972.67	99.99	0.13689	0.00935	0.12754					25	3972.35	99.98	0.75582	0.00945	0.74637
26	3968.88	99.9	0.08448	0.00925	0.07523					26	3971.46	99.96	1.52923	0.00912	1.52011
27	3973.01	100	0.16083	0.00919	0.15164					27	3972.5	99.99	4.12635	0.00959	4.11676
28	3972.35	99.98	0.0936	0.0088	0.0848					28	3972.5	99.99	0.54761	0.00906	0.53855
29	3972.03	99.98	0.1757	0.00942	0.16628					29	3972.35	99.98	2.9433	0.00942	2.93388
30	3972.35	99.98	0.274	0.00954	0.26446					30	3970.41	99.93	3.42519	0.00924	3.41595
31	3972.35	99.98	0.11701	0.00915	0.10786					31	3972.67	99.99	1.30416	0.004	1.30016
32	3969.44	99.91	0.0635	0.00945	0.05405					32	3972.5	99.99	3.08704	0.004	3.08304
33	3973.01	100	0.14529	0.00908	0.13621					33	3969.12	99.9	2.76101	0.00933	2.75168
34	3973	100	0.25929	0.00947	0.24982					34	3972.35	99.98	1.82944	0.00903	1.82041
35	3972.35	99.98	0.25797	0.00945	0.24852					35	3973	100	2.64924	0.00938	2.63986
36	3964.22	99.78	0.1411	0.00957	0.13153					36	3973.01	100	0.50823	0.00909	0.49914
37	3973.01	100	0.08888	0.00885	0.08003					37	3972.5	99.99	2.30249	0.00895	2.29354
38	3972.35	99.98	0.22051	0.004	0.21651					38	3972.35	99.98	3.24743	0.00932	3.23811
39	3971.98	99.97	0.14111	0.00932	0.13179					39	3973.01	100	2.77582	0.00934	2.76648
40	3972.35	99.98	0.16146	0.00928	0.15218					40	3972.67	99.99	1.4502	0.00911	1.44109
41	3972.67	99.99	0.12273	0.00912	0.11361					41	3972.35	99.98	2.59114	0.00911	2.58203
42	3972.5	99.99	0.16765	0.00882	0.15883					42	3967.5	99.86	3.26627	0.00962	3.25665
43	3972.67	99.99	0.0796	0.00875	0.07085					43	3973.01	100	1.61386	0.00911	1.60475
44	3972.35	99.98	0.07544	0.00908	0.06636					44	3973	100	3.13682	0.00939	3.12743
45	3965.24	99.8	0.11022	0.00896	0.10126					45	3972.67	99.99	2.72334	0.00914	2.7142
46	3970.73	99.94	0.09253	0.00923	0.0833					46	3973	100	0.67711	0.00887	0.66824
47	3972.67	99.99	0.2077	0.0096	0.1981					47	3972.67	99.99	2.17011	0.00944	2.16067
48	3968.88	99.9	0.34386	0.00968	0.33418					48	3972.67	99.99	1.16123	0.00923	1.152
49	3973	100	0.11513	0.00897	0.10616					49	3973	100	0.47699	0.00928	0.46771
50	3972.35	99.98	0.20925	0.00925	0.2					50	3972.35	99.98	2.26421	0.00921	2.255
51	3973	100	0.0851	0.00904	0.07606					51	3973	100	1.04208	0.00934	1.03274
52	3972.35	99.98	0.1639	0.00927	0.15463					52	3973	100	2.8459	0.00914	2.83676
53	3972.67	99.99	0.20422	0.00953	0.19469					53	3972.35	99.98	3.09806	0.00917	3.08889
54	3970.73	99.94	0.11104	0.00929	0.10175					54	3972.5	99.99	3.58911	0.00928	3.57983
55	3970.73	99.94	0.17	0.00902	0.16098					55	3971.46	99.96	3.02182	0.00926	3.01256
56	3973	100	0.28118	0.00903	0.27215					56	3972.67	99.99	3.89208	0.00921	3.88287
57	3973	100	0.22315	0.00959	0.21356					57	3971.46	99.96	3.02631	0.00933	3.01698
58	3972.67	99.99	0.1186	0.00903	0.10957					58	3973.01	100	4.00322	0.00938	3.99384
59	3972.67	99.99	0.09313	0.00933	0.0838					59	3972.35	99.98	1.43134	0.00943	1.42191
60	3972.67	99.99	0.15061	0.00901	0.1416					60	3971.98	99.97	2.50012	0.00963	2.49049
61	3973.01	100	0.18537	0.004	0.18137					61	3972.35	99.98	1.25661	0.00936	1.24725
62	3973.01	100	0.17378	0.00928	0.1645					62	3973	100	2.3525	0.00906	2.34344
63	3971.98	99.97	0.2455	0.00946	0.23604					63	3973	100	3.20824	0.00941	3.19883
64	3973	100	0.10498	0.00918	0.0958					64	3972.35	99.98	2.35498	0.00909	2.34589
65	3973.01	100	0.19206	0.00965	0.18241					65	3973.01	100	2.37155	0.00927	2.36228
66	3973.01	100	0.10519	0.00943	0.09576					66	3971.98	99.97	2.45778	0.00922	2.44856
67	3971.98	99.97	0.16758	0.009	0.15858					67	3972.35	99.98	2.89982	0.00948	2.89034
68	3972.67	99.99	0.10277	0.00953	0.09324					68	3972.03	99.98	4.24153	0.004	4.23753
69	3972.67	99.99	0.08405	0.00952	0.07453					69	3972.5	99.99	3.21797	0.00926	3.20871
70	3972.5	99.99	0.05968	0.00968	0.05					70	3972.67	99.99	2.02848	0.00934	2.01914
71	3973	100	0.08984	0.00942	0.08042					71	3972.67	99.99	1.677	0.00928	1.66772
72	3973.01	100	0.15708	0.00971	0.14737					72	3973.01	100	1.3136	0.00921	1.30439
73	3972.67	99.99	0.13151	0.00924	0.12227					73	3973	100	2.28531	0.00905	2.27626
74	3972.67	99.99	0.09784	0.00913	0.08871					74	3967.18	99.85	2.61009	0.00906	2.60103
75	3970.41	99.93	0.13722	0.00954	0.12768					75	3971.98	99.97	2.21084	0.00966	2.20118
76	3967.5	99.86	0.09699	0.0092	0.08779					76	3972.35	99.98	3.57035	0.00915	3.5612
77	3970.41	99.93	0.12035	0.00923	0.11112					77	3973	100	3.26119	0.00917	3.25202
78	3972.35	99.98	0.14239	0.00954	0.13285					78	3970.41	99.93	3.65411	0.00885	3.64526
79	3972.67	99.99	0.12438	0.00906	0.11532					79	3973	100	3.36441	0.00913	3.35528
80	3972.67	99.99	0.13091	0.00975	0.12116					80	3973	100	0.44925	0.00908	0.44017
81	3972.67	99.99	0.14775	0.00946	0.13829					81	3972.67	99.99	4.28805	0.00921	4.27884
82	3972.03	99.98	0.10605	0.00944	0.09661					82	3971.98	99.97	2.52429	0.00943	2.51486
83	3969.12	99.9	0.07989	0.00964	0.07025					83	3972.67	99.99	2.97734	0.00926	2.96808
84	3973.01	100	0.09641	0.00957	0.08684					84	3972.5	99.99	2.04352	0.00905	2.03447
85	3967.84	99.87	0.11954	0.00936	0.11018					85	3971.98	99.97	3.04112	0.00959	3.03153
86	3972.03	99.98	0.17104	0.00942	0.16162					86	3972.67	99.99	3.4983	0.00959	3.48871
87	3972.5	99.99	0.13152	0.00947	0.12205					87	3973	100	3.83061	0.00928	3.82133
88	3972.35	99.98	0.27155	0.0092	0.26235					88	3973	100	3.75905	0.00915	3.7499
89	3972.67	99.99	0.127	0.004	0.123					89	3972.35	99.98	3.13774	0.00926	3.12848
90	3972.5	99.99	0.20973	0.0092	0.20053					90	3972.35	99.98	1.61608	0.00946	1.60662
91	3972.5	99.99	0.16009	0.00902	0.15107					91	3972.67	99.99	1.95896	0.00916	1.9498
92	3967.18	99.85	0.17858	0.00897	0.16961					92	3972.5	99.99	2.83632	0.00891	2.82741
93	3973	100	0.08111	0.00951	0.0716					93	3972.35	99.98	2.93242	0.00936	2.92306
94	3970.73	99.94	0.1805	0.00944	0.17106					94	3972.5	99.99	2.89428	0.00968	2.8846
95	3973.01	100	0.13928	0.00889	0.13039					95	3970.73	99.94	4.15317	0.00967	4.1435
96	3970.73	99.94	0.21089	0.00894	0.20195					96	3972.35	99.98	2.50578	0.00889	2.49689
97	3972.5	99.99	0.11475	0.0094	0.10535					97	3972.03	99.98	3.06316	0.004	3.05916
98	3972.35	99.98	0.20633	0.0097	0.19663					98	3972.5	99.99	2.05234	0.00961	2.04273
99	3973	100	0.13184	0.00917	0.12267					99	3972.67	99.99	3.63675	0.00912	3.62763
100	3972.03	99.98	0.12382	0.00897	0.11485					100	3972.67	99.99	2.82331	0.00916	2.81415
101	3967.18	99.85	0.18382	0.00936	0.17446					101	3971.98	99.97	1.78323	0.00986	1.77337
102	3972.5	99.99	0.14282	0.00947	0.13335					102	3972.67	99.99	2.47218	0.00943	2.46275
103	3964.74	99.79	0.08149	0.00937	0.07212					103	3972.5	99.99	2.60958	0.00894	2.60064
104	3971.46	99.96	0.25659	0.00955	0.24704					104	3972.67	99.99	1.74962	0.00925	1.74037
105	3971.06	99.95	0.20253	0.00956	0.19297					105	3972.67	99.99	1.53991	0.00915	1.53076
106	3972.5	99.99	0.11031	0.00915	0.10116					106	3972.35	99.98	3.7485	0.00981	3.73869
107	3970.41	99.93	0.11976	0.00912	0.11064					107	3973	100	1.91908	0.00902	1.91006
108	3972.67	99.99	0.11906	0.00887	0.11019					108	3971.98	99.97	2.35725	0.00921	2.34804
109	3971.98	99.97	0.12673	0.00973	0.117					109	3973	100	3.856	0.00962	3.84638
110	3967.84	99.87	0.15886	0.00949	0.14937					110	3972.5	99.99	2.91395	0.00905	2.9049
111	3972.35	99.98	0.13511	0.00914	0.12597					111	3972.35	99.98	1.94843	0.00904	1.93939
112	3971.46	99.96	0.21465	0.00928	0.20537					112	3972.5	99.99	2.47877	0.00949	2.46928
113	3963.19	99.75	0.05912	0.00938	0.04974					113	3971.46	99.96	1.94654	0.00901	1.93753
114	3973	100	0.21372	0.00928	0.20444					114	3969.12	99.9	3.1401	0.00923	3.13087
115	3973	100	0.10844	0.0098	0.09864					115	3973.01	100	3.9167	0.00961	3.90709
116	3972.03	99.98	0.21839	0.00897	0.20942					116	3973	100	1.38964	0.00936	1.38028
117	3971.98	99.97	0.14336	0.00934	0.13402					117	3969.39	99.91	3.08737	0.00912	3.07825
118	3972.5	99.99	0.16145	0.00888	0.15257					118	3973	100	2.35449	0.00911	2.34538
119	3972.5	99.99	0.2176	0.004	0.2136					119	3969.44	99.91	3.38679	0.004	3.38279
120	3972.67	99.99	0.22023	0.00943	0.2108					120	3973	100	3.38528	0.0092	3.37608
121	3972.67	99.99	0.20068	0.00908	0.1916					121	3973	100	3.02265	0.00931	3.01334
122	3971.98	99.97	0.07558	0.00928	0.0663					122	3973.01	100	3.09086	0.00911	3.08175
123	3968.47	99.89	0.08958	0.00897	0.08061					123	3972.35	99.98	2.72487	0.00954	2.71533
124	3972.35	99.98	0.18946	0.00895	0.18051					124	3972.5	99.99	3.54111	0.00956	3.53155
125	3972.67	99.99	0.22487	0.00946	0.21541					125	3972.67	99.99	2.85929	0.0095	2.84979
126	3970.73	99.94	0.12893	0.00915	0.11978					126	3972.5	99.99	2.97419	0.00926	2.96493
127	3970.43	99.94	0.08919	0.009	0.08019					127	3972.67	99.99	0.67532	0.00916	0.66616
128	3972.67	99.99	0.11493	0.00929	0.10564					128	3972.67	99.99	3.57401	0.00922	3.56479
129	3973.01	100	0.21824	0.00968	0.20856					129	3972.67	99.99	3.25805	0.00952	3.24853
130	3972.5	99.99	0.13185	0.00937	0.12248					130	3972.5	99.99	2.04208	0.00926	2.03282
131	3971.06	99.95	0.2008	0.00923	0.19157					131	3972.35	99.98	3.85477	0.00892	3.84585
132	3972.67	99.99	0.13442	0.0093	0.12512					132	3969.39	99.91	2.61206	0.00903	2.60303
133	3972.67	99.99	0.1262	0.00922	0.11698					133	3973	100	2.89854	0.00944	2.8891
134	3970.43	99.94	0.119	0.00899	0.11001					134	3972.35	99.98	2.05278	0.00935	2.04343
135	3972.35	99.98	0.16277	0.004	0.15877					135	3972.35	99.98	1.07122	0.00914	1.06208
136	3973	100	0.13483	0.00924	0.12559					136	3972.5	99.99	1.09735	0.00932	1.08803
137	3972.67	99.99	0.24806	0.0094	0.23866					137	3970.73	99.94	3.64076	0.00894	3.63182
138	3970.41	99.93	0.13077	0.00921	0.12156					138	3972.67	99.99	3.16394	0.00908	3.15486
139	3968.36	99.88	0.08497	0.00953	0.07544					139	3973	100	3.39506	0.00964	3.38542
140	3972.03	99.98	0.12548	0.00936	0.11612					140	3973	100	0.52441	0.00906	0.51535
141	3972.67	99.99	0.08579	0.00927	0.07652					141	3971.46	99.96	2.60827	0.00945	2.59882
142	3970.41	99.93	0.1368	0.00919	0.12761					142	3972.67	99.99	1.49494	0.00907	1.48587
143	3972.67	99.99	0.1404	0.00917	0.13123					143	3972.67	99.99	3.41175	0.00905	3.4027
144	3973	100	0.1397	0.00955	0.13015					144	3971.98	99.97	3.06975	0.00986	3.05989
145	3973	100	0.09218	0.0094	0.08278					145	3969.39	99.91	1.94603	0.00903	1.937
146	3972.35	99.98	0.25784	0.00902	0.24882					146	3972.5	99.99	2.05147	0.00927	2.0422
147	3972.67	99.99	0.12333	0.0093	0.11403					147	3973	100	0.76666	0.00957	0.75709
148	3971.46	99.96	0.14504	0.00911	0.13593					148	3973	100	3.00341	0.00928	2.99413
149	3972.67	99.99	0.14513	0.0091	0.13603					149	3972.5	99.99	2.04246	0.00971	2.03275
150	3973	100	0.20597	0.00968	0.19629					150	3972.67	99.99	1.83523	0.00933	1.8259
151	3972.5	99.99	0.23272	0.00912	0.2236					151	3972.67	99.99	3.21774	0.00989	3.20785
152	3962.67	99.74	0.09846	0.0089	0.08956					152	3972.5	99.99	3.61842	0.00909	3.60933
153	3972.03	99.98	0.13886	0.00946	0.1294					153	3971.98	99.97	2.80915	0.00921	2.79994
154	3972.35	99.98	0.22245	0.00935	0.2131					154	3970.73	99.94	2.41212	0.0096	2.40252
155	3973	100	0.14345	0.00912	0.13433					155	3972.35	99.98	2.75285	0.00936	2.74349
156	3973.01	100	0.09353	0.00948	0.08405					156	3971.98	99.97	1.99563	0.00908	1.98655
157	3962.67	99.74	0.07582	0.00914	0.06668					157	3972.35	99.98	1.46482	0.00906	1.45576
158	3972.35	99.98	0.14679	0.00941	0.13738					158	3973	100	3.12565	0.00917	3.11648
159	3972.5	99.99	0.19634	0.00934	0.187					159	3972.67	99.99	3.6124	0.00956	3.60284
160	3972.67	99.99	0.15152	0.0094	0.14212					160	3973	100	2.40605	0.00929	2.39676
161	3971.98	99.97	0.16482	0.00927	0.15555					161	3972.67	99.99	3.05527	0.00902	3.04625
162	3971.06	99.95	0.07723	0.00959	0.06764					162	3972.03	99.98	2.16621	0.00905	2.15716
163	3972.35	99.98	0.17627	0.00932	0.16695					163	3973	100	1.54158	0.0093	1.53228
164	3972.03	99.98	0.16448	0.00924	0.15524					164	3971.98	99.97	2.03748	0.00952	2.02796
165	3972.67	99.99	0.20389	0.00937	0.19452					165	3972.67	99.99	1.17946	0.00901	1.17045
166	3973	100	0.14358	0.00933	0.13425					166	3972.67	99.99	3.77363	0.00963	3.764
167	3972.67	99.99	0.18848	0.0091	0.17938					167	3972.67	99.99	1.1599	0.00932	1.15058
168	3971.98	99.97	0.14337	0.00916	0.13421					168	3972.5	99.99	3.1345	0.00955	3.12495
169	3971.98	99.97	0.08781	0.00939	0.07842					169	3972.03	99.98	1.69258	0.00933	1.68325
170	3972.67	99.99	0.0877	0.00953	0.07817					170	3973	100	2.39332	0.00921	2.38411
171	3970.09	99.93	0.0804	0.00905	0.07135					171	3973	100	3.58778	0.00909	3.57869
172	3961.36	99.71	0.07968	0.00917	0.07051					172	3972.67	99.99	2.32217	0.00954	2.31263
173	3969.12	99.9	0.20795	0.00933	0.19862					173	3973.01	100	1.01884	0.00927	1.00957
174	3971.98	99.97	0.08368	0.00909	0.07459					174	3972.67	99.99	2.84435	0.00902	2.83533
175	3962.98	99.75	0.11922	0.00925	0.10997					175	3972.67	99.99	3.14354	0.0095	3.13404
176	3972.5	99.99	0.18799	0.0095	0.17849					176	3972.5	99.99	2.90443	0.00969	2.89474
177	3972.67	99.99	0.29977	0.00954	0.29023					177	3972.67	99.99	3.71602	0.00931	3.70671
178	3971.46	99.96	0.09708	0.00959	0.08749					178	3970.73	99.94	3.01882	0.00948	3.00934
179	3972.35	99.98	0.09348	0.00912	0.08436					179	3972.35	99.98	3.03205	0.00945	3.0226
180	3972.67	99.99	0.13228	0.00948	0.1228					180	3970.41	99.93	2.61816	0.00902	2.60914
181	3970.41	99.93	0.08238	0.00924	0.07314					181	3973	100	0.502	0.00946	0.49254
182	3973	100	0.13951	0.00943	0.13008					182	3972.5	99.99	2.98617	0.0094	2.97677
183	3972.5	99.99	0.11875	0.00933	0.10942					183	3972.5	99.99	1.24382	0.00903	1.23479
184	3972.5	99.99	0.237	0.00943	0.22757					184	3973	100	2.84215	0.00907	2.83308
185	3973.01	100	0.08586	0.00902	0.07684					185	3972.67	99.99	1.69392	0.0091	1.68482
186	3973.01	100	0.16878	0.00942	0.15936					186	3972.67	99.99	2.04392	0.00924	2.03468
187	3972.67	99.99	0.13699	0.00907	0.12792					187	3973	100	2.61227	0.00957	2.6027
188	3972.67	99.99	0.18822	0.00937	0.17885					188	3972.35	99.98	2.34318	0.00934	2.33384
189	3972.35	99.98	0.1314	0.00919	0.12221					189	3972.67	99.99	1.7835	0.004	1.7795
190	3968.36	99.88	0.08855	0.00882	0.07973					190	3972.03	99.98	2.82059	0.00908	2.81151
191	3972.35	99.98	0.15088	0.0091	0.14178					191	3972.35	99.98	3.16804	0.00903	3.15901
192	3969.12	99.9	0.09382	0.00942	0.0844					192	3972.35	99.98	0.58486	0.00912	0.57574
193	3970.23	99.93	0.09006	0.00908	0.08098					193	3972.67	99.99	3.01216	0.00969	3.00247
194	3972.03	99.98	0.08434	0.00921	0.07513					194	3971.06	99.95	2.27004	0.00922	2.26082
195	3970.73	99.94	0.09914	0.00897	0.09017					195	3972.5	99.99	1.42691	0.00891	1.418
196	3972.67	99.99	0.16782	0.00969	0.15813					196	3972.5	99.99	1.4488	0.00935	1.43945
197	3972.67	99.99	0.16731	0.00909	0.15822					197	3972.5	99.99	0.87742	0.009	0.86842
198	3973	100	0.08584	0.004	0.08184					198	3970.41	99.93	2.11385	0.00912	2.10473
199	3972.67	99.99	0.17607	0.00946	0.16661					199	3973	100	1.55709	0.00927	1.54782
200	3970.09	99.93	0.11892	0.0092	0.10972					200	3973.01	100	2.76225	0.00943	2.75282

## Sheet: 09_EHCFACO_Seeds(11)
Fast Converegnce Exp							Fast Converegnce Exp			Slow Converegnce Exp							Slow Converegnce Exp
#	CBLF	Quality	Taumax	Taumin	DeltaTauminmax		Global Optimal Solution =	3973.01		#	CBLF	Quality	Taumax	Taumin	DeltaTauminmax		Global Optimal Solution =	3973.01
1	3973	100	0.13892	0.00954	0.12938		Minimum Optimal Solution =	3953.7		1	3973	100	1.40536	0.00954	1.39582		Minimum Optimal Solution =	3969.12
2	3970.95	99.95	0.1225	0.004	0.1185		Mean of Optimal Solution =	3971.54		2	3972.5	99.99	1.07065	0.00926	1.06139		Mean of Optimal Solution =	3972.41
3	3973.01	100	0.14383	0.00923	0.1346		Median of Optimal Solution =	3971.54		3	3973.01	100	1.26116	0.00917	1.25199		Median of Optimal Solution =	3972.41
4	3972.67	99.99	0.08589	0.00893	0.07696		Solution Standrad Deviation =	2.1642		4	3972.67	99.99	3.21408	0.00893	3.20515		Solution Standrad Deviation =	0.76589
5	3972.67	99.99	0.07178	0.00919	0.06259		Average Price =	25.01		5	3973	100	1.28531	0.0092	1.27611		Average Price =	80.42
6	3971.46	99.96	0.07595	0.00935	0.0666		Relability =	88		6	3972.67	99.99	0.74919	0.00924	0.73995		Relability =	100
7	3973	100	0.11497	0.00935	0.10562		Normalized Price =	28.4205		7	3969.39	99.91	3.76413	0.00921	3.75492		Normalized Price =	80.42
8	3970.41	99.93	0.10134	0.00918	0.09216		Average Solution Quality =	99.9629		8	3973	100	2.00799	0.00901	1.99898		Average Solution Quality =	99.985
9	3968.88	99.9	0.08114	0.00919	0.07195		Average FDC =	-129.665		9	3972.35	99.98	2.70423	0.00952	2.69471		Average FDC =	-53.4349
10	3972.35	99.98	0.09645	0.00952	0.08693		Correlation Coefficent =	-1		10	3972.35	99.98	3.14472	0.00912	3.1356		Correlation Coefficent =	-0.68806
11	3971.98	99.97	0.15024	0.0094	0.14084		Solution Robustness =	1835.08		11	3972.67	99.99	2.62885	0.00989	2.61896		Solution Robustness =	5186.64
12	3973.01	100	0.16353	0.00979	0.15374		Performance Rate =	0.035186		12	3973	100	0.72512	0.00893	0.71619		Performance Rate =	0.012435
13	3968.47	99.89	0.11545	0.0094	0.10605		Average Elapsed Time =	2.054		13	3970.41	99.93	2.97811	0.00938	2.96873		Average Elapsed Time =	7.3293
14	3969.12	99.9	0.1505	0.00919	0.14131					14	3973	100	2.63108	0.00901	2.62207
15	3972.67	99.99	0.16151	0.0093	0.15221					15	3972.67	99.99	2.85067	0.00953	2.84114
16	3971.98	99.97	0.34189	0.00968	0.33221					16	3971.06	99.95	3.99571	0.004	3.99171
17	3972.35	99.98	0.2001	0.00926	0.19084					17	3973.01	100	0.61639	0.00907	0.60732
18	3972.67	99.99	0.14003	0.00969	0.13034					18	3972.35	99.98	2.61378	0.0094	2.60438
19	3972.67	99.99	0.11811	0.00986	0.10825					19	3972.67	99.99	3.68328	0.00914	3.67414
20	3972.5	99.99	0.15145	0.00904	0.14241					20	3972.67	99.99	1.92705	0.00917	1.91788
21	3966.21	99.83	0.14566	0.00921	0.13645					21	3973	100	2.61828	0.00944	2.60884
22	3973.01	100	0.199	0.00936	0.18964					22	3972.35	99.98	3.19236	0.00955	3.18281
23	3973	100	0.12234	0.00975	0.11259					23	3972.35	99.98	3.14943	0.00934	3.14009
24	3971.46	99.96	0.07559	0.00904	0.06655					24	3972.5	99.99	0.93283	0.00907	0.92376
25	3971.46	99.96	0.12307	0.00957	0.1135					25	3970.41	99.93	3.90173	0.00937	3.89236
26	3972.5	99.99	0.12393	0.00917	0.11476					26	3972.35	99.98	3.43979	0.00935	3.43044
27	3971.06	99.95	0.11863	0.00904	0.10959					27	3973	100	4.0016	0.00933	3.99227
28	3970.95	99.95	0.11082	0.009	0.10182					28	3972.35	99.98	2.37489	0.00883	2.36606
29	3972.35	99.98	0.11171	0.00967	0.10204					29	3973.01	100	1.42548	0.00947	1.41601
30	3972.35	99.98	0.10501	0.00916	0.09585					30	3971.98	99.97	3.22218	0.00969	3.21249
31	3971.98	99.97	0.11069	0.00928	0.10141					31	3970.41	99.93	3.83967	0.00932	3.83035
32	3972.35	99.98	0.13244	0.00942	0.12302					32	3973	100	3.2414	0.00944	3.23196
33	3972.67	99.99	0.11085	0.0096	0.10125					33	3973	100	3.78937	0.00938	3.77999
34	3972.67	99.99	0.0884	0.00919	0.07921					34	3969.12	99.9	3.45208	0.00982	3.44226
35	3970.73	99.94	0.11552	0.00915	0.10637					35	3973.01	100	2.47521	0.00931	2.4659
36	3973	100	0.21733	0.00918	0.20815					36	3971.98	99.97	2.91192	0.00917	2.90275
37	3968.36	99.88	0.08444	0.00891	0.07553					37	3973.01	100	1.96011	0.0091	1.95101
38	3969.12	99.9	0.0981	0.00951	0.08859					38	3972.5	99.99	3.79277	0.00928	3.78349
39	3972.35	99.98	0.09236	0.00894	0.08342					39	3973	100	3.12661	0.00939	3.11722
40	3973.01	100	0.20017	0.00905	0.19112					40	3973.01	100	3.47627	0.00936	3.46691
41	3968.36	99.88	0.22971	0.0093	0.22041					41	3972.35	99.98	3.14723	0.00901	3.13822
42	3973	100	0.1718	0.0094	0.1624					42	3972.67	99.99	3.17074	0.00913	3.16161
43	3972.35	99.98	0.31443	0.00928	0.30515					43	3972.67	99.99	3.94657	0.00935	3.93722
44	3972.35	99.98	0.21442	0.00905	0.20537					44	3972.67	99.99	3.09908	0.00962	3.08946
45	3971.46	99.96	0.13968	0.00965	0.13003					45	3973.01	100	3.42617	0.00907	3.4171
46	3972.5	99.99	0.16804	0.00934	0.1587					46	3973	100	2.34132	0.00959	2.33173
47	3972.35	99.98	0.13982	0.00951	0.13031					47	3972.5	99.99	0.75737	0.0092	0.74817
48	3972.5	99.99	0.11489	0.00927	0.10562					48	3972.67	99.99	4.0991	0.00953	4.08957
49	3971.46	99.96	0.14802	0.00946	0.13856					49	3972.67	99.99	3.1415	0.00963	3.13187
50	3973	100	0.19391	0.00921	0.1847					50	3972.67	99.99	4.43602	0.00946	4.42656
51	3973	100	0.11155	0.00947	0.10208					51	3973	100	2.05845	0.00923	2.04922
52	3972.03	99.98	0.16986	0.00961	0.16025					52	3973	100	1.42219	0.00885	1.41334
53	3971.98	99.97	0.16387	0.00942	0.15445					53	3972.67	99.99	2.58924	0.00922	2.58002
54	3972.5	99.99	0.08417	0.00935	0.07482					54	3973	100	1.94869	0.009	1.93969
55	3972.67	99.99	0.15982	0.00923	0.15059					55	3972.5	99.99	2.36577	0.00977	2.356
56	3972.35	99.98	0.15667	0.00949	0.14718					56	3971.98	99.97	2.93722	0.00953	2.92769
57	3972.5	99.99	0.1308	0.00942	0.12138					57	3972.67	99.99	0.9031	0.00931	0.89379
58	3972.5	99.99	0.10744	0.00915	0.09829					58	3972.67	99.99	1.29896	0.00953	1.28943
59	3973.01	100	0.13436	0.009	0.12536					59	3973.01	100	2.58074	0.0094	2.57134
60	3970.73	99.94	0.10761	0.00929	0.09832					60	3971.06	99.95	2.76792	0.00944	2.75848
61	3972.03	99.98	0.08046	0.0096	0.07086					61	3972.67	99.99	2.25499	0.00882	2.24617
62	3972.35	99.98	0.10294	0.00936	0.09358					62	3973	100	0.70096	0.00936	0.6916
63	3972.5	99.99	0.14764	0.00922	0.13842					63	3972.35	99.98	1.40624	0.00891	1.39733
64	3973.01	100	0.18764	0.00931	0.17833					64	3972.67	99.99	1.74669	0.00908	1.73761
65	3972.35	99.98	0.30538	0.00946	0.29592					65	3972.67	99.99	3.37004	0.00943	3.36061
66	3973	100	0.13076	0.00942	0.12134					66	3972.67	99.99	3.26638	0.00933	3.25705
67	3972.35	99.98	0.16893	0.00939	0.15954					67	3972.35	99.98	2.39637	0.00913	2.38724
68	3972.5	99.99	0.14379	0.00934	0.13445					68	3973	100	2.69874	0.00956	2.68918
69	3972.35	99.98	0.18463	0.00924	0.17539					69	3972.03	99.98	3.95814	0.00952	3.94862
70	3972.67	99.99	0.14858	0.00907	0.13951					70	3973.01	100	2.43981	0.00935	2.43046
71	3972.35	99.98	0.08968	0.00934	0.08034					71	3972.67	99.99	2.13582	0.00913	2.12669
72	3972.35	99.98	0.23146	0.00931	0.22215					72	3972.67	99.99	1.61727	0.00957	1.6077
73	3971.98	99.97	0.0859	0.00921	0.07669					73	3973.01	100	1.14135	0.00897	1.13238
74	3971.06	99.95	0.25541	0.00887	0.24654					74	3973.01	100	2.41265	0.00949	2.40316
75	3972.67	99.99	0.28416	0.00923	0.27493					75	3973	100	3.52606	0.00948	3.51658
76	3968.36	99.88	0.09855	0.00915	0.0894					76	3972.67	99.99	4.0421	0.00916	4.03294
77	3972.5	99.99	0.18396	0.00953	0.17443					77	3973	100	1.54537	0.00879	1.53658
78	3973.01	100	0.14371	0.00938	0.13433					78	3971.46	99.96	2.49162	0.00896	2.48266
79	3972.67	99.99	0.15246	0.00946	0.143					79	3972.5	99.99	2.09876	0.00925	2.08951
80	3972.35	99.98	0.17062	0.00948	0.16114					80	3972.35	99.98	3.62186	0.004	3.61786
81	3970.41	99.93	0.21238	0.00956	0.20282					81	3972.5	99.99	2.55664	0.00913	2.54751
82	3972.67	99.99	0.15964	0.00939	0.15025					82	3973	100	3.83538	0.00966	3.82572
83	3971.46	99.96	0.12389	0.00942	0.11447					83	3973	100	3.29822	0.00919	3.28903
84	3967.84	99.87	0.08922	0.00907	0.08015					84	3973.01	100	3.03986	0.00916	3.0307
85	3972.67	99.99	0.16899	0.009	0.15999					85	3973	100	3.68123	0.00935	3.67188
86	3970.09	99.93	0.09911	0.00987	0.08924					86	3971.06	99.95	1.3544	0.00955	1.34485
87	3966.29	99.83	0.13671	0.00946	0.12725					87	3972.5	99.99	3.65702	0.00979	3.64723
88	3971.46	99.96	0.16652	0.00934	0.15718					88	3973	100	2.84932	0.0093	2.84002
89	3971.06	99.95	0.07699	0.00939	0.0676					89	3970.73	99.94	3.4348	0.00906	3.42574
90	3972.5	99.99	0.15186	0.00895	0.14291					90	3973.01	100	2.90067	0.00925	2.89142
91	3972.35	99.98	0.22762	0.00944	0.21818					91	3972.35	99.98	0.86611	0.0093	0.85681
92	3968.88	99.9	0.144	0.00936	0.13464					92	3972.5	99.99	1.99823	0.0089	1.98933
93	3968.88	99.9	0.16707	0.00944	0.15763					93	3972.67	99.99	3.80934	0.00951	3.79983
94	3971.46	99.96	0.10967	0.00926	0.10041					94	3973.01	100	3.12726	0.0094	3.11786
95	3970.41	99.93	0.23834	0.00922	0.22912					95	3973	100	2.33989	0.00934	2.33055
96	3966.53	99.84	0.09341	0.00922	0.08419					96	3972.67	99.99	2.58423	0.00933	2.5749
97	3969.12	99.9	0.16636	0.00903	0.15733					97	3972.67	99.99	2.47932	0.00932	2.47
98	3972.67	99.99	0.13069	0.00953	0.12116					98	3973.01	100	0.70718	0.00952	0.69766
99	3972.35	99.98	0.15977	0.00928	0.15049					99	3972.67	99.99	3.77653	0.004	3.77253
100	3967.5	99.86	0.13182	0.00912	0.1227					100	3971.98	99.97	4.57973	0.00967	4.57006
101	3972.5	99.99	0.14864	0.00929	0.13935					101	3970.73	99.94	3.51509	0.00913	3.50596
102	3971.98	99.97	0.11044	0.004	0.10644					102	3973	100	1.79572	0.00899	1.78673
103	3972.67	99.99	0.06833	0.00942	0.05891					103	3972.35	99.98	2.37969	0.00939	2.3703
104	3972.49	99.99	0.07771	0.00971	0.068					104	3973.01	100	3.61567	0.00916	3.60651
105	3972.35	99.98	0.22235	0.00948	0.21287					105	3971.46	99.96	2.59125	0.00897	2.58228
106	3973	100	0.08461	0.00886	0.07575					106	3973.01	100	1.39496	0.00936	1.3856
107	3972.5	99.99	0.23982	0.00956	0.23026					107	3973.01	100	1.43472	0.00957	1.42515
108	3972.5	99.99	0.08507	0.00915	0.07592					108	3971.46	99.96	2.73766	0.00914	2.72852
109	3973.01	100	0.21649	0.00882	0.20767					109	3972.35	99.98	3.71968	0.0094	3.71028
110	3973	100	0.24324	0.00915	0.23409					110	3971.98	99.97	3.03617	0.00935	3.02682
111	3968.88	99.9	0.14028	0.00959	0.13069					111	3973.01	100	1.9587	0.00908	1.94962
112	3973	100	0.14753	0.00929	0.13824					112	3973.01	100	2.12142	0.00943	2.11199
113	3969.39	99.91	0.17614	0.0093	0.16684					113	3973	100	3.4461	0.0093	3.4368
114	3971.98	99.97	0.17204	0.00962	0.16242					114	3972.35	99.98	3.13993	0.00947	3.13046
115	3970.73	99.94	0.12278	0.00982	0.11296					115	3971.98	99.97	3.35543	0.00962	3.34581
116	3972.67	99.99	0.06722	0.0094	0.05782					116	3972.35	99.98	2.10916	0.00924	2.09992
117	3972.35	99.98	0.16574	0.0094	0.15634					117	3971.98	99.97	2.58392	0.0096	2.57432
118	3970.23	99.93	0.10105	0.00928	0.09177					118	3972.5	99.99	1.26065	0.00903	1.25162
119	3972.5	99.99	0.1282	0.00948	0.11872					119	3971.98	99.97	3.29851	0.00938	3.28913
120	3971.46	99.96	0.15728	0.0094	0.14788					120	3970.73	99.94	2.37683	0.00928	2.36755
121	3969.12	99.9	0.08924	0.00936	0.07988					121	3971.06	99.95	3.73774	0.0094	3.72834
122	3973.01	100	0.17743	0.00937	0.16806					122	3973	100	3.35938	0.00931	3.35007
123	3972.5	99.99	0.12776	0.00935	0.11841					123	3973	100	2.83932	0.0091	2.83022
124	3972.35	99.98	0.11058	0.0091	0.10148					124	3972.35	99.98	2.972	0.00981	2.96219
125	3971.98	99.97	0.19247	0.00936	0.18311					125	3972.35	99.98	1.45262	0.00952	1.4431
126	3973	100	0.08099	0.00924	0.07175					126	3972.67	99.99	3.98757	0.00912	3.97845
127	3972.5	99.99	0.22412	0.00937	0.21475					127	3972.67	99.99	3.19928	0.00952	3.18976
128	3969.39	99.91	0.1316	0.00982	0.12178					128	3973	100	1.69325	0.00967	1.68358
129	3971.46	99.96	0.20317	0.00931	0.19386					129	3972.5	99.99	2.41099	0.00949	2.4015
130	3953.7	99.51	0.09518	0.00927	0.08591					130	3971.46	99.96	2.70102	0.00895	2.69207
131	3973	100	0.11951	0.00905	0.11046					131	3972.03	99.98	0.87632	0.0098	0.86652
132	3971.98	99.97	0.08751	0.00906	0.07845					132	3973	100	0.47715	0.00912	0.46803
133	3966.88	99.85	0.08102	0.00921	0.07181					133	3973.01	100	2.02654	0.00929	2.01725
134	3972.03	99.98	0.13294	0.0094	0.12354					134	3969.39	99.91	2.6191	0.00974	2.60936
135	3972.5	99.99	0.08471	0.00891	0.0758					135	3970.41	99.93	2.42553	0.00884	2.41669
136	3973	100	0.10261	0.00892	0.09369					136	3972.67	99.99	3.44325	0.0096	3.43365
137	3973	100	0.21339	0.00969	0.2037					137	3973.01	100	1.908	0.00896	1.89904
138	3971.98	99.97	0.18963	0.00978	0.17985					138	3973	100	4.251	0.004	4.247
139	3972.35	99.98	0.13987	0.00911	0.13076					139	3972.5	99.99	3.14002	0.00946	3.13056
140	3972.35	99.98	0.18004	0.00926	0.17078					140	3972.5	99.99	2.66681	0.00943	2.65738
141	3973	100	0.14007	0.00931	0.13076					141	3973.01	100	0.69614	0.00901	0.68713
142	3972.5	99.99	0.1051	0.00927	0.09583					142	3972.67	99.99	0.67404	0.00921	0.66483
143	3971.46	99.96	0.15408	0.0092	0.14488					143	3972.67	99.99	0.89269	0.00917	0.88352
144	3973	100	0.12758	0.0088	0.11878					144	3972.35	99.98	2.87982	0.00959	2.87023
145	3972.67	99.99	0.20447	0.00952	0.19495					145	3972.67	99.99	1.87262	0.0091	1.86352
146	3973.01	100	0.21284	0.00914	0.2037					146	3969.44	99.91	2.75415	0.00977	2.74438
147	3972.67	99.99	0.12756	0.00931	0.11825					147	3973	100	3.13159	0.00955	3.12204
148	3972.67	99.99	0.16726	0.00954	0.15772					148	3971.46	99.96	0.79023	0.00932	0.78091
149	3972.67	99.99	0.15977	0.00935	0.15042					149	3973	100	3.712	0.00898	3.70302
150	3972.67	99.99	0.24726	0.00946	0.2378					150	3972.67	99.99	3.30757	0.00927	3.2983
151	3972.67	99.99	0.22286	0.00916	0.2137					151	3972.67	99.99	3.42819	0.00965	3.41854
152	3972.03	99.98	0.08825	0.00929	0.07896					152	3972.5	99.99	3.10446	0.00964	3.09482
153	3971.46	99.96	0.13952	0.00926	0.13026					153	3972.67	99.99	2.61912	0.00939	2.60973
154	3972.5	99.99	0.10908	0.00969	0.09939					154	3972.03	99.98	0.80549	0.00913	0.79636
155	3967.5	99.86	0.09704	0.00954	0.0875					155	3972.5	99.99	2.31267	0.00978	2.30289
156	3970.73	99.94	0.17943	0.00919	0.17024					156	3972.67	99.99	2.72607	0.00937	2.7167
157	3973	100	0.10663	0.00911	0.09752					157	3973	100	2.65654	0.00898	2.64756
158	3968.88	99.9	0.12211	0.00927	0.11284					158	3972.67	99.99	3.04856	0.00921	3.03935
159	3968.36	99.88	0.07631	0.00917	0.06714					159	3973	100	0.82314	0.00941	0.81373
160	3973	100	0.19484	0.00888	0.18596					160	3973	100	1.98131	0.00946	1.97185
161	3964.62	99.79	0.0847	0.00903	0.07567					161	3972.67	99.99	3.82094	0.00902	3.81192
162	3970.09	99.93	0.13924	0.00893	0.13031					162	3973.01	100	2.11583	0.00926	2.10657
163	3973.01	100	0.17674	0.00939	0.16735					163	3972.67	99.99	3.3227	0.00942	3.31328
164	3970.41	99.93	0.093	0.009	0.084					164	3972.67	99.99	2.17281	0.00938	2.16343
165	3973.01	100	0.21487	0.00934	0.20553					165	3973	100	4.00339	0.00961	3.99378
166	3971.46	99.96	0.05833	0.00956	0.04877					166	3973	100	2.34032	0.0094	2.33092
167	3972.67	99.99	0.07211	0.00984	0.06227					167	3972.35	99.98	3.87603	0.00964	3.86639
168	3972.03	99.98	0.20032	0.00935	0.19097					168	3970.73	99.94	3.28453	0.00928	3.27525
169	3972.5	99.99	0.12683	0.00899	0.11784					169	3972.35	99.98	2.69302	0.00912	2.6839
170	3972.35	99.98	0.19395	0.0092	0.18475					170	3973.01	100	3.07439	0.00942	3.06497
171	3969.39	99.91	0.10949	0.00963	0.09986					171	3972.67	99.99	2.52493	0.00924	2.51569
172	3973.01	100	0.1549	0.00915	0.14575					172	3972.35	99.98	2.45473	0.00939	2.44534
173	3972.03	99.98	0.07178	0.00902	0.06276					173	3972.67	99.99	2.29592	0.00899	2.28693
174	3972.35	99.98	0.11537	0.00925	0.10612					174	3970.73	99.94	2.84677	0.00929	2.83748
175	3972.35	99.98	0.13118	0.00954	0.12164					175	3972.67	99.99	3.5369	0.00899	3.52791
176	3968.36	99.88	0.07217	0.00928	0.06289					176	3971.46	99.96	1.54148	0.00908	1.5324
177	3972.67	99.99	0.08536	0.00918	0.07618					177	3972.03	99.98	1.54524	0.00898	1.53626
178	3971.98	99.97	0.12237	0.00925	0.11312					178	3972.35	99.98	3.72807	0.00919	3.71888
179	3968.47	99.89	0.0928	0.00892	0.08388					179	3972.5	99.99	3.65312	0.00956	3.64356
180	3972.03	99.98	0.11934	0.00925	0.11009					180	3972.5	99.99	3.29155	0.00955	3.282
181	3967.84	99.87	0.08849	0.0098	0.07869					181	3972.67	99.99	2.01483	0.00936	2.00547
182	3962.67	99.74	0.14142	0.00984	0.13158					182	3972.35	99.98	1.94547	0.0093	1.93617
183	3972.35	99.98	0.08071	0.00918	0.07153					183	3972.67	99.99	2.7623	0.00967	2.75263
184	3972.67	99.99	0.12793	0.00979	0.11814					184	3972.03	99.98	3.07836	0.00929	3.06907
185	3972.67	99.99	0.13078	0.00924	0.12154					185	3971.98	99.97	3.03047	0.00911	3.02136
186	3972.35	99.98	0.16067	0.00974	0.15093					186	3972.03	99.98	3.33134	0.0096	3.32174
187	3973.01	100	0.07733	0.00917	0.06816					187	3970.73	99.94	3.98075	0.00952	3.97123
188	3971.98	99.97	0.11916	0.00942	0.10974					188	3971.46	99.96	2.40116	0.00928	2.39188
189	3971.46	99.96	0.14521	0.00896	0.13625					189	3971.06	99.95	3.39887	0.00968	3.38919
190	3968.36	99.88	0.08767	0.00894	0.07873					190	3973	100	2.02974	0.004	2.02574
191	3973	100	0.09074	0.00915	0.08159					191	3972.67	99.99	0.54786	0.00925	0.53861
192	3972.5	99.99	0.12135	0.00938	0.11197					192	3973.01	100	3.24109	0.00912	3.23197
193	3970.95	99.95	0.18162	0.00925	0.17237					193	3971.46	99.96	1.71511	0.00908	1.70603
194	3972.67	99.99	0.15717	0.00899	0.14818					194	3973	100	2.22486	0.004	2.22086
195	3972.5	99.99	0.16142	0.00932	0.1521					195	3973	100	3.26978	0.00942	3.26036
196	3972.67	99.99	0.09661	0.00969	0.08692					196	3972.03	99.98	2.01043	0.00943	2.001
197	3973	100	0.14288	0.00933	0.13355					197	3973	100	3.79402	0.00889	3.78513
198	3972.03	99.98	0.1873	0.00981	0.17749					198	3972.35	99.98	2.3499	0.00982	2.34008
199	3972.03	99.98	0.1133	0.00935	0.10395					199	3972.5	99.99	3.4263	0.00936	3.41694
200	3972.35	99.98	0.16427	0.00925	0.15502					200	3972.67	99.99	1.31464	0.00932	1.30532

[truncated: 1 more sheets: 10_EHCFACO_Seeds(25)]
