# Supplementary material for: Enhanced Hyper-Cube Framework Aco for Combinatorial Optimization Problems
Source: Preprints.org preprint supplement (doi:10.20944/preprints202108.0573.v1), 2021-08-31
Supplement: Supplementary file 16 [file 08_HCFMMACO_@_Seeds(75)_Exp.xlsx]

## Sheet: 08_HCFMMACO_@_Seeds(75)_Fast
Slow Convergence										Slow Convergenece
ige	Fbest(ige)	Fworst(ige)	Fmean(ige)	BWLocalDis	GlobalDis	Segma	MaxTau	MinTau		Expeirement no.(Iexp) =	15
1	3694.88	1738.27	2754.16	14	6	1	1	0		Seeds =	75
2	3694.88	1971.72	2703.88	10	6	1	1	0		Number of variables =	16
3	3694.88	1487.6	2708.27	11	6	1	1	0		no. of Ants =	25
4	3694.88	1917.88	2619.77	10	6	1	1	0		Maximum CBLF(fopt) =	3973.01
5	3973.01	3254.74	3625.86	9	0	1	1	0		Optimal Solution(xopt) =	233332333333333
6	3973.01	1822.02	2700.8	11	0	1	1	0		Number of Practical Optima =	1
7	3973.01	1398.88	2534.96	12	0	1	1	0		no. of Iterations(ige) =	15
8	3973.01	3127	3619.03	9	0	1	1	0		1st Global optima Found @ ige =	5
9	3973.01	3300.38	3621.76	7	0	1	1	0		Minimum Best Solution =	3694.88
10	3973.01	1741.6	2589.53	14	0	1	1	0		Mean of Best Solution =	3898.84
11	3973.01	1725.35	2770.67	14	0	1	1	0		SD of Best Solution =	127.314
12	3973.01	1687.99	2854.71	14	0	1	1	0		Fitness Distance Correlation =	-326.348
13	3973.01	1997	2851.12	11	0	1	1	0		Correlation Coefficent =	-0.93333
14	3973.01	1888.53	2717.32	11	0	1	1	0		Elapsed Time =	0.72451
15	3973.01	1890.76	2782.82	11	0	1	1	0

## Sheet: 08_HCFMMACO_@_Seeds(75)_Slow
Slow Convergence										Slow Convergenece
ige	Fbest(ige)	Fworst(ige)	Fmean(ige)	BWLocalDis	GlobalDis	Segma	MaxTau	MinTau		Expeirement no.(Iexp) =	25
1	3576.09	2166.06	2788.39	13	8	1	1	0		Seeds =	75
2	3588.79	1651.3	2733.45	10	11	1	1	0		Number of variables =	16
3	3588.79	1879.48	2683.91	11	11	1	1	0		no. of Ants =	25
4	3719.81	1744.1	2789.27	11	7	1	1	0		Maximum CBLF(fopt) =	3973.01
5	3719.81	2112.21	2823.66	10	7	1	1	0		Optimal Solution(xopt) =	233332333333333
6	3730.19	1906.71	2831.68	9	7	1	1	0		Number of Practical Optima =	1
7	3742.82	2016.79	2768.39	11	8	1	1	0		no. of Iterations(ige) =	98
8	3742.82	1468.61	2744.78	14	8	1	1	0		1st Global optima Found @ ige =	42
9	3824.5	1586.65	2805.08	13	8	1	1	0		Minimum Best Solution =	3576.09
10	3824.5	1581.69	2641.28	10	8	1	1	0		Mean of Best Solution =	3933.38
11	3824.5	1192.63	2797.02	13	8	1	1	0		SD of Best Solution =	86.2978
12	3824.5	2432.41	3125.95	10	8	1	1	0		Fitness Distance Correlation =	-220.897
13	3906.39	1712.87	2842.73	14	5	1	1	0		Correlation Coefficent =	-0.81879
14	3906.39	2061.79	2794.22	13	5	1	1	0		Elapsed Time =	4.5935
15	3906.39	1906.8	2803.31	12	5	1	1	0
16	3906.39	1673.42	2760.43	13	5	1	1	0
17	3915.71	2792.83	3305.66	13	8	1	1	0
18	3915.71	1762.44	2681.99	14	8	1	1	0
19	3915.71	1693.69	2613.95	11	8	1	1	0
20	3915.71	1948.95	2733.9	9	8	1	1	0
21	3915.71	2427.91	3242.54	14	8	1	1	0
22	3949.43	2915.06	3487.64	11	3	1	1	0
23	3949.43	2352.84	3156.5	10	3	1	1	0
24	3949.43	1988.22	2932.73	11	3	1	1	0
25	3949.43	2942.34	3421.91	9	3	1	1	0
26	3949.43	2363.45	3215.07	9	3	1	1	0
27	3949.43	2322.64	3381.64	9	3	1	1	0
28	3949.43	1902.27	3171.41	10	3	1	1	0
29	3949.43	2952.77	3435.86	8	3	1	1	0
30	3949.43	2776.18	3517.02	8	3	1	1	0
31	3949.43	2506.46	3269.27	9	3	1	1	0
32	3949.43	2259.74	3373.11	6	3	1	1	0
33	3949.43	2074.02	3334.42	9	3	1	1	0
34	3949.43	3360.96	3638.05	5	3	1	1	0
35	3949.43	2802.57	3497.8	7	3	1	1	0
36	3964.92	3348.96	3690.86	6	2	1	1	0
37	3967.02	2983.17	3698.1	7	2	1	1	0
38	3967.53	2989.23	3712.54	9	1	1	1	0
39	3967.53	2566.04	3563.61	11	1	2	1	0
40	3967.53	3234.36	3700.58	5	1	1	1	0
41	3971.38	2656.33	3720.33	9	2	1	1	0
42	3973.01	2955.49	3672.86	7	0	1	1	0
43	3973.01	3090.26	3649.46	5	0	1	1	0
44	3973.01	3375.62	3811.68	3	0	1	1	0
45	3973.01	3272.27	3731.72	3	0	2	1	0
46	3973.01	3409.2	3841.05	5	0	4	1	0
47	3973.01	3378.54	3816.36	5	0	4	1	0
48	3973.01	3539.73	3833.27	2	0	7	1	0
49	3973.01	3597.9	3924.53	2	0	8	1	0
50	3973.01	3603.88	3937.26	2	0	16	1	0
51	3973.01	3793.8	3959.03	1	0	20	1	0
52	3973.01	3953.61	3971.1	1	0	20	1	0
53	3973.01	3638.75	3948.72	2	0	20	1	0
54	3973.01	3801.89	3964.61	1	0	20	1	0
55	3973.01	3585.33	3950.19	1	0	21	1	0
56	3973.01	3794.5	3953.54	2	0	21	1	0
57	3973.01	3967.18	3972.56	1	0	23	1	0
58	3973.01	3520.8	3926.66	1	0	21	1	0
59	3973.01	3953.61	3971.32	1	0	21	1	0
60	3973.01	3600.26	3956.89	1	0	23	1	0
61	3973.01	3796.55	3965.26	1	0	22	1	0
62	3973.01	3821.76	3963.58	1	0	22	1	0
63	3973.01	3918.7	3970.84	1	0	24	1	0
64	3973.01	3821.76	3966.28	1	0	21	1	0
65	3973.01	3600.26	3949.13	1	0	22	1	0
66	3973.01	3961.36	3972.55	1	0	24	1	0
67	3973.01	3971.06	3972.93	1	0	24	1	0
68	3973.01	3918.7	3970.84	1	0	24	1	0
69	3973.01	3973.01	3973.01	0	0	25	1	0
70	3973.01	3973.01	3973.01	0	0	25	1	0
71	3973.01	3973.01	3973.01	0	0	25	1	0
72	3973.01	3973.01	3973.01	0	0	25	1	0
73	3973.01	3868.26	3968.82	1	0	24	1	0
74	3973.01	3973.01	3973.01	0	0	25	1	0
75	3973.01	3801.89	3966.17	1	0	24	1	0
76	3973.01	3973.01	3973.01	0	0	25	1	0
77	3973.01	3801.89	3966.09	1	0	23	1	0
78	3973.01	3971.06	3972.93	1	0	24	1	0
79	3973.01	3973.01	3973.01	0	0	25	1	0
80	3973.01	3973.01	3973.01	0	0	25	1	0
81	3973.01	3973.01	3973.01	0	0	25	1	0
82	3973.01	3973.01	3973.01	0	0	25	1	0
83	3973.01	3600.26	3958.1	1	0	24	1	0
84	3973.01	3973.01	3973.01	0	0	25	1	0
85	3973.01	3973.01	3973.01	0	0	25	1	0
86	3973.01	3961.36	3972.55	1	0	24	1	0
87	3973.01	3973.01	3973.01	0	0	25	1	0
88	3973.01	3973.01	3973.01	0	0	25	1	0
89	3973.01	3973.01	3973.01	0	0	25	1	0
90	3973.01	3973.01	3973.01	0	0	25	1	0
91	3973.01	3973.01	3973.01	0	0	25	1	0
92	3973.01	3973.01	3973.01	0	0	25	1	0
93	3973.01	3973.01	3973.01	0	0	25	1	0
94	3973.01	3973.01	3973.01	0	0	25	1	0
95	3973.01	3973.01	3973.01	0	0	25	1	0
96	3973.01	3973.01	3973.01	0	0	25	1	0
97	3973.01	3973.01	3973.01	0	0	25	1	0
98	3973.01	3973.01	3973.01	0	0	25	1	0
