# Supplementary material for: Enhanced Hyper-Cube Framework Aco for Combinatorial Optimization Problems
Source: Preprints.org preprint supplement (doi:10.20944/preprints202108.0573.v1), 2021-08-31
Supplement: Supplementary file 17 [file 08_HCFMMACO_Seeds_Results.xlsx]

## Sheet: 00_Index
		Global optimal solution		Relaibility (%)		Normalized Price (iteration)		Correlation Coefficent		Performance rate		Elapsed time (Sec)		Solution Quality
		Fast convergence	Slow Convergence	Fast convergence	Slow Convergence	Fast convergence	Slow Convergence	Fast convergence	Slow Convergence	Fast convergence	Slow Convergence	Fast convergence	Slow Convergence	Fast convergence	Slow Convergence
	Seed (301)	3973.01	3973.01	9.5	93	205.579	109.22	-1	-0.74958	0.0048643	0.0091558	0.9636	4.6295	98.4528	99.9672
	Seed (2)	3973.01	3973.01	13	91	153.808	111.665	-1	-0.76224	0.0065016	0.0089554	0.94375	4.6223	98.695	99.9664
	Seed (50)	3972.67	3973.01	9.5	90.5	213.632	109.335	-1	-0.73153	0.0049273	0.0091462	0.96226	4.6187	98.5484	99.9704
	Seed (75)	3973.01	3973.01	11	90.5	176.454	176.454	-1	-0.72358	0.0056672	0.008907	0.92206	4.7444	98.5638	99.9674
	Seed (111)	3973	3973.01	12.5	91	164.4	110.857	-1	-0.73973	0.0060827	0.0090206	0.97734	4.6049	98.527	99.9671
	Seed (200)	3973.01	3973.01	15.5	88.5	139.484	114.266	-1	-0.7324	0.0071693	0.0087515	1.0229	4.727	98.4778	99.9655
	Seed (167)	3973.01	3973.01	21.695	90	149.621	112.944	-1	-0.74763	0.0050025	0.0088539	1.0233	4.657	98.6875	99.9683
	Seed (225)	3973.01	3973.01	10	91	199.9	110.407	-1	-1	0.0083116	0.0090574	0.94919	4.6268	98.6141	99.9682
	Seed (11)	3973.01	3973.01	17.5	91.5	120.314	110.732	-1	-0.73472	0.0083116	0.0090308	0.99968	4.8359	98.5565	99.9668
	Seed (25)	3973.01	3973.01	11.5	93.5	169.435	107.139	-1	-0.74849	0.005902	0.0093337	0.92512	4.7415	98.566	99.9707
			Fast Convergence						Slow Convergence
			Relaibility (%)	Normalized Price (iteration)	Correlation Coefficent	Performance Rate	Elapsed time (sec)		Relaibility (%)	Normalized Price (iteration)	Correlation Coefficent	Performance Rate	Elapsed time (sec)
		Min.	9.5	120.314	-1	0.0048643	0.92206	Min.	88.5	107.139	-1	0.0087515	4.6049
		Max.	21.695	213.632	-1	0.0083116	1.0233	Max.	93.5	176.454	-0.72358	0.0093337	4.8359
		Mean	13.1695	169.263	-1	0.00627401	0.96892	Mean	91.05	117.302	-0.76699	0.00902123	4.6808
		Median	12	166.917	-1	0.00599235	0.96293	Median	91	110.795	-0.74368	0.0090257	4.64325
		Standrad division	3.76584	28.6512	0	0.00122954	0.034782	Standrad division	1.35	19.8074	0.0783959	0.000158398	0.0728516
			Solution Quality
			Fast Conv.	Slow Conv.
		Min.	98.4528	99.9655
		Max.	98.695	99.9707
		Mean	98.5689	99.9678
		Median	98.5601	99.9673
		Standrad division	0.0749351	0.00157607

## Sheet: 01_HCFMMACO_Seeds(301)
Fast Converegnce Exp							Fast Converegnce Exp			Slow Converegnce Exp							Slow Converegnce Exp
#	CBLF	Quality	Taumax	Taumin	DeltaTauminmax		Global Optimal Solution =	3973.01		#	CBLF	Quality	Taumax	Taumin	DeltaTauminmax		Global Optimal Solution =	3973.01
1	3948.72	99.39	1	0	1		Minimum Optimal Solution =	3643.23		1	3971.98	99.97	1	0	1		Minimum Optimal Solution =	3961.69
2	3930.66	98.93	1	0	1		Mean of Optimal Solution =	3911.54		2	3972.35	99.98	1	0	1		Mean of Optimal Solution =	3971.71
3	3790.09	95.4	1	0	1		Median of Optimal Solution =	3911.54		3	3970.09	99.93	1	0	1		Median of Optimal Solution =	3971.71
4	3905.92	98.31	1	0	1		Solution Standrad Deviation =	56.9729		4	3972.67	99.99	1	0	1		Solution Standrad Deviation =	1.8647
5	3756.39	94.55	1	0	1		Average Price =	19.53		5	3972.67	99.99	1	0	1		Average Price =	101.575
6	3834.46	96.51	1	0	1		Relability =	9.5		6	3973	100	1	0	1		Relability =	93
7	3971.98	99.97	1	0	1		Normalized Price =	205.579		7	3972.67	99.99	1	0	1		Normalized Price =	109.22
8	3925.45	98.8	1	0	1		Average Solution Quality =	98.4528		8	3972.5	99.99	1	0	1		Average Solution Quality =	99.9672
9	3760.23	94.64	1	0	1		Average FDC =	-315.137		9	3972.35	99.98	1	0	1		Average FDC =	-136.107
10	3972.35	99.98	1	0	1		Correlation Coefficent =	-1		10	3972.35	99.98	1	0	1		Correlation Coefficent =	-0.74958
11	3903.22	98.24	1	0	1		Solution Robustness =	68.6561		11	3973	100	1	0	1		Solution Robustness =	2129.96
12	3959.05	99.65	1	0	1		Performance Rate =	0.0048643		12	3972.35	99.98	1	0	1		Performance Rate =	0.0091558
13	3908.39	98.37	1	0	1		Average Elapsed Time =	0.9636		13	3973	100	1	0	1		Average Elapsed Time =	4.6295
14	3878.92	97.63	1	0	1					14	3972.5	99.99	1	0	1
15	3909.86	98.41	1	0	1					15	3972.5	99.99	1	0	1
16	3911.92	98.46	1	0	1					16	3973	100	1	0	1
17	3893.4	98	1	0	1					17	3970.95	99.95	1	0	1
18	3972.35	99.98	1	0	1					18	3972.35	99.98	1	0	1
19	3945.85	99.32	1	0	1					19	3970.41	99.93	1	0	1
20	3967.84	99.87	1	0	1					20	3972.67	99.99	1	0	1
21	3871.55	97.45	1	0	1					21	3969.39	99.91	1	0	1
22	3725.25	93.76	1	0	1					22	3970.73	99.94	1	0	1
23	3710.91	93.4	1	0	1					23	3970.41	99.93	1	0	1
24	3948.72	99.39	1	0	1					24	3970.73	99.94	1	0	1
25	3836.71	96.57	1	0	1					25	3972.5	99.99	1	0	1
26	3954.25	99.53	1	0	1					26	3972.67	99.99	1	0	1
27	3855.99	97.05	1	0	1					27	3972.67	99.99	1	0	1
28	3866.81	97.33	1	0	1					28	3972.5	99.99	1	0	1
29	3845.41	96.79	1	0	1					29	3972.35	99.98	1	0	1
30	3966.53	99.84	1	0	1					30	3973.01	100	1	0	1
31	3861.34	97.19	1	0	1					31	3973.01	100	1	0	1
32	3949.75	99.41	1	0	1					32	3972.35	99.98	1	0	1
33	3872.84	97.48	1	0	1					33	3972.35	99.98	1	0	1
34	3874.9	97.53	1	0	1					34	3973.01	100	1	0	1
35	3869.28	97.39	1	0	1					35	3970.09	99.93	1	0	1
36	3967.97	99.87	1	0	1					36	3973	100	1	0	1
37	3971.46	99.96	1	0	1					37	3970.73	99.94	1	0	1
38	3907.09	98.34	1	0	1					38	3971.46	99.96	1	0	1
39	3914.52	98.53	1	0	1					39	3972.5	99.99	1	0	1
40	3923.55	98.76	1	0	1					40	3970.73	99.94	1	0	1
41	3933.57	99.01	1	0	1					41	3972.35	99.98	1	0	1
42	3947.16	99.35	1	0	1					42	3972.67	99.99	1	0	1
43	3926.48	98.83	1	0	1					43	3971.46	99.96	1	0	1
44	3892.14	97.96	1	0	1					44	3973.01	100	1	0	1
45	3930.62	98.93	1	0	1					45	3972.35	99.98	1	0	1
46	3885.85	97.81	1	0	1					46	3972.35	99.98	1	0	1
47	3896.5	98.07	1	0	1					47	3972.67	99.99	1	0	1
48	3742.9	94.21	1	0	1					48	3972.5	99.99	1	0	1
49	3894.79	98.03	1	0	1					49	3972.35	99.98	1	0	1
50	3951.16	99.45	1	0	1					50	3973	100	1	0	1
51	3865.18	97.29	1	0	1					51	3971.46	99.96	1	0	1
52	3848.41	96.86	1	0	1					52	3963.71	99.77	1	0	1
53	3940.5	99.18	1	0	1					53	3965.24	99.8	1	0	1
54	3933.69	99.01	1	0	1					54	3971.98	99.97	1	0	1
55	3972.35	99.98	1	0	1					55	3972.67	99.99	1	0	1
56	3958.54	99.64	1	0	1					56	3972.35	99.98	1	0	1
57	3921.31	98.7	1	0	1					57	3970.73	99.94	1	0	1
58	3870.88	97.43	1	0	1					58	3973	100	1	0	1
59	3952.25	99.48	1	0	1					59	3973	100	1	0	1
60	3897.17	98.09	1	0	1					60	3972.03	99.98	1	0	1
61	3892.23	97.97	1	0	1					61	3972.67	99.99	1	0	1
62	3939.5	99.16	1	0	1					62	3972.35	99.98	1	0	1
63	3876.14	97.56	1	0	1					63	3971.98	99.97	1	0	1
64	3956.95	99.6	1	0	1					64	3972.67	99.99	1	0	1
65	3902.89	98.24	1	0	1					65	3972.35	99.98	1	0	1
66	3843.57	96.74	1	0	1					66	3972.35	99.98	1	0	1
67	3884.74	97.78	1	0	1					67	3973	100	1	0	1
68	3937.24	99.1	1	0	1					68	3973	100	1	0	1
69	3906.45	98.32	1	0	1					69	3970.41	99.93	1	0	1
70	3903.4	98.25	1	0	1					70	3973	100	1	0	1
71	3815.85	96.04	1	0	1					71	3971.06	99.95	1	0	1
72	3949.17	99.4	1	0	1					72	3972.35	99.98	1	0	1
73	3972.5	99.99	1	0	1					73	3973.01	100	1	0	1
74	3853.65	97	1	0	1					74	3972.35	99.98	1	0	1
75	3868.67	97.37	1	0	1					75	3973	100	1	0	1
76	3973	100	1	0	1					76	3972.67	99.99	1	0	1
77	3958.45	99.63	1	0	1					77	3973	100	1	0	1
78	3968.88	99.9	1	0	1					78	3972.67	99.99	1	0	1
79	3889.78	97.91	1	0	1					79	3973	100	1	0	1
80	3930.1	98.92	1	0	1					80	3969.12	99.9	1	0	1
81	3958.25	99.63	1	0	1					81	3969.12	99.9	1	0	1
82	3951.05	99.45	1	0	1					82	3972.35	99.98	1	0	1
83	3964.59	99.79	1	0	1					83	3972.35	99.98	1	0	1
84	3922.1	98.72	1	0	1					84	3972.67	99.99	1	0	1
85	3970.43	99.94	1	0	1					85	3972.35	99.98	1	0	1
86	3929.32	98.9	1	0	1					86	3969.39	99.91	1	0	1
87	3915.8	98.56	1	0	1					87	3972.67	99.99	1	0	1
88	3903.22	98.24	1	0	1					88	3971.46	99.96	1	0	1
89	3877.01	97.58	1	0	1					89	3968.88	99.9	1	0	1
90	3971.7	99.97	1	0	1					90	3972.67	99.99	1	0	1
91	3930.45	98.93	1	0	1					91	3972.67	99.99	1	0	1
92	3912.53	98.48	1	0	1					92	3968.8	99.89	1	0	1
93	3958.78	99.64	1	0	1					93	3972.35	99.98	1	0	1
94	3962.77	99.74	1	0	1					94	3971.98	99.97	1	0	1
95	3929.9	98.91	1	0	1					95	3969.39	99.91	1	0	1
96	3968.88	99.9	1	0	1					96	3973.01	100	1	0	1
97	3849.78	96.9	1	0	1					97	3971.98	99.97	1	0	1
98	3929.37	98.9	1	0	1					98	3971.46	99.96	1	0	1
99	3968.36	99.88	1	0	1					99	3972.5	99.99	1	0	1
100	3832.72	96.47	1	0	1					100	3972.67	99.99	1	0	1
101	3943.38	99.25	1	0	1					101	3973	100	1	0	1
102	3794.72	95.51	1	0	1					102	3967.18	99.85	1	0	1
103	3972.67	99.99	1	0	1					103	3971.98	99.97	1	0	1
104	3965.26	99.8	1	0	1					104	3973.01	100	1	0	1
105	3899.02	98.14	1	0	1					105	3971.98	99.97	1	0	1
106	3867	97.33	1	0	1					106	3971.46	99.96	1	0	1
107	3940.44	99.18	1	0	1					107	3972.5	99.99	1	0	1
108	3917.7	98.61	1	0	1					108	3968.88	99.9	1	0	1
109	3971.46	99.96	1	0	1					109	3973.01	100	1	0	1
110	3964.27	99.78	1	0	1					110	3972.35	99.98	1	0	1
111	3900.12	98.17	1	0	1					111	3970.41	99.93	1	0	1
112	3796.68	95.56	1	0	1					112	3971.46	99.96	1	0	1
113	3937.34	99.1	1	0	1					113	3971.46	99.96	1	0	1
114	3937.4	99.1	1	0	1					114	3973	100	1	0	1
115	3820.34	96.16	1	0	1					115	3972.5	99.99	1	0	1
116	3964.74	99.79	1	0	1					116	3972.67	99.99	1	0	1
117	3837.43	96.59	1	0	1					117	3972.03	99.98	1	0	1
118	3962.66	99.74	1	0	1					118	3972.03	99.98	1	0	1
119	3917.62	98.61	1	0	1					119	3972.35	99.98	1	0	1
120	3918.96	98.64	1	0	1					120	3973.01	100	1	0	1
121	3962.33	99.73	1	0	1					121	3972.5	99.99	1	0	1
122	3952.46	99.48	1	0	1					122	3971.46	99.96	1	0	1
123	3960.07	99.67	1	0	1					123	3972.35	99.98	1	0	1
124	3643.23	91.7	1	0	1					124	3973	100	1	0	1
125	3938.86	99.14	1	0	1					125	3972.67	99.99	1	0	1
126	3943.06	99.25	1	0	1					126	3970.41	99.93	1	0	1
127	3881.95	97.71	1	0	1					127	3972.5	99.99	1	0	1
128	3928.49	98.88	1	0	1					128	3972.67	99.99	1	0	1
129	3903.01	98.24	1	0	1					129	3972.67	99.99	1	0	1
130	3777.72	95.08	1	0	1					130	3972.5	99.99	1	0	1
131	3917.74	98.61	1	0	1					131	3973	100	1	0	1
132	3949.75	99.41	1	0	1					132	3967.84	99.87	1	0	1
133	3908.6	98.38	1	0	1					133	3973	100	1	0	1
134	3886.71	97.83	1	0	1					134	3972.35	99.98	1	0	1
135	3914.59	98.53	1	0	1					135	3972.67	99.99	1	0	1
136	3940.44	99.18	1	0	1					136	3968.88	99.9	1	0	1
137	3928.1	98.87	1	0	1					137	3973	100	1	0	1
138	3968.15	99.88	1	0	1					138	3972.5	99.99	1	0	1
139	3935.19	99.05	1	0	1					139	3972.35	99.98	1	0	1
140	3908.36	98.37	1	0	1					140	3972.35	99.98	1	0	1
141	3937.86	99.12	1	0	1					141	3972.5	99.99	1	0	1
142	3931.14	98.95	1	0	1					142	3972.35	99.98	1	0	1
143	3958.25	99.63	1	0	1					143	3973.01	100	1	0	1
144	3945.62	99.31	1	0	1					144	3971.98	99.97	1	0	1
145	3859.57	97.14	1	0	1					145	3973	100	1	0	1
146	3882.63	97.73	1	0	1					146	3972.5	99.99	1	0	1
147	3933.89	99.02	1	0	1					147	3965.24	99.8	1	0	1
148	3899.08	98.14	1	0	1					148	3969.39	99.91	1	0	1
149	3800.86	95.67	1	0	1					149	3973.01	100	1	0	1
150	3940.85	99.19	1	0	1					150	3969.12	99.9	1	0	1
151	3907.05	98.34	1	0	1					151	3972.67	99.99	1	0	1
152	3972.5	99.99	1	0	1					152	3970.09	99.93	1	0	1
153	3972.03	99.98	1	0	1					153	3973	100	1	0	1
154	3852.04	96.96	1	0	1					154	3972.67	99.99	1	0	1
155	3941.48	99.21	1	0	1					155	3973	100	1	0	1
156	3933.18	99	1	0	1					156	3972.35	99.98	1	0	1
157	3835.06	96.53	1	0	1					157	3972.35	99.98	1	0	1
158	3962.47	99.73	1	0	1					158	3973.01	100	1	0	1
159	3961.36	99.71	1	0	1					159	3972.03	99.98	1	0	1
160	3930.92	98.94	1	0	1					160	3969.12	99.9	1	0	1
161	3916.09	98.57	1	0	1					161	3968.8	99.89	1	0	1
162	3972.03	99.98	1	0	1					162	3969.12	99.9	1	0	1
163	3933.72	99.01	1	0	1					163	3972.5	99.99	1	0	1
164	3925.45	98.8	1	0	1					164	3973.01	100	1	0	1
165	3958.78	99.64	1	0	1					165	3965.24	99.8	1	0	1
166	3882.03	97.71	1	0	1					166	3971.06	99.95	1	0	1
167	3970.43	99.94	1	0	1					167	3971.98	99.97	1	0	1
168	3879.89	97.66	1	0	1					168	3972.35	99.98	1	0	1
169	3972.5	99.99	1	0	1					169	3972.5	99.99	1	0	1
170	3927	98.84	1	0	1					170	3973	100	1	0	1
171	3964.74	99.79	1	0	1					171	3972.03	99.98	1	0	1
172	3800.34	95.65	1	0	1					172	3972.35	99.98	1	0	1
173	3951.3	99.45	1	0	1					173	3973	100	1	0	1
174	3973.01	100	1	0	1					174	3973	100	1	0	1
175	3905.8	98.31	1	0	1					175	3970.41	99.93	1	0	1
176	3962.16	99.73	1	0	1					176	3973	100	1	0	1
177	3939.39	99.15	1	0	1					177	3972.35	99.98	1	0	1
178	3879.37	97.64	1	0	1					178	3969.39	99.91	1	0	1
179	3940.44	99.18	1	0	1					179	3973	100	1	0	1
180	3947.16	99.35	1	0	1					180	3966.29	99.83	1	0	1
181	3928.03	98.87	1	0	1					181	3963.3	99.76	1	0	1
182	3943.03	99.25	1	0	1					182	3972.67	99.99	1	0	1
183	3970.73	99.94	1	0	1					183	3961.68	99.71	1	0	1
184	3958.54	99.64	1	0	1					184	3972.35	99.98	1	0	1
185	3905.56	98.3	1	0	1					185	3972.35	99.98	1	0	1
186	3936.31	99.08	1	0	1					186	3972.5	99.99	1	0	1
187	3955.95	99.57	1	0	1					187	3971.06	99.95	1	0	1
188	3940.5	99.18	1	0	1					188	3973	100	1	0	1
189	3838.56	96.62	1	0	1					189	3972.67	99.99	1	0	1
190	3972.03	99.98	1	0	1					190	3973.01	100	1	0	1
191	3834.75	96.52	1	0	1					191	3973	100	1	0	1
192	3959.05	99.65	1	0	1					192	3971.06	99.95	1	0	1
193	3799.56	95.63	1	0	1					193	3970.09	99.93	1	0	1
194	3841.69	96.69	1	0	1					194	3969.12	99.9	1	0	1
195	3927	98.84	1	0	1					195	3972.35	99.98	1	0	1
196	3833.43	96.49	1	0	1					196	3971.46	99.96	1	0	1
197	3923.23	98.75	1	0	1					197	3970.41	99.93	1	0	1
198	3944.38	99.28	1	0	1					198	3971.46	99.96	1	0	1
199	3950.49	99.43	1	0	1					199	3972.67	99.99	1	0	1
200	3873.78	97.5	1	0	1					200	3972.5	99.99	1	0	1

## Sheet: 02_HCFMMACO_Seeds(2)
Fast Converegnce Exp							Fast Converegnce Exp			Slow Converegnce Exp							Slow Converegnce Exp
#	CBLF	Quality	Taumax	Taumin	DeltaTauminmax		Global Optimal Solution =	3973.01		#	CBLF	Quality	Taumax	Taumin	DeltaTauminmax		Global Optimal Solution =	3973.01
1	3970.73	99.94	1	0	1		Minimum Optimal Solution =	3704.64		1	3970.73	99.94	1	0	1		Minimum Optimal Solution =	3952.96
2	3961.04	99.7	1	0	1		Mean of Optimal Solution =	3921.16		2	3972.67	99.99	1	0	1		Mean of Optimal Solution =	3971.67
3	3966.86	99.85	1	0	1		Median of Optimal Solution =	3921.16		3	3971.98	99.97	1	0	1		Median of Optimal Solution =	3971.67
4	3948.72	99.39	1	0	1		Solution Standrad Deviation =	54.4377		4	3970.41	99.93	1	0	1		Solution Standrad Deviation =	2.2011
5	3960.42	99.68	1	0	1		Average Price =	19.995		5	3971.38	99.96	1	0	1		Average Price =	101.615
6	3968.88	99.9	1	0	1		Relability =	13		6	3973	100	1	0	1		Relability =	91
7	3919.49	98.65	1	0	1		Normalized Price =	153.808		7	3952.96	99.5	1	0	1		Normalized Price =	111.665
8	3929.59	98.91	1	0	1		Average Solution Quality =	98.695		8	3972.35	99.98	1	0	1		Average Solution Quality =	99.9664
9	3864.88	97.28	1	0	1		Average FDC =	-276.1		9	3972.35	99.98	1	0	1		Average FDC =	-141.872
10	3970.09	99.93	1	0	1		Correlation Coefficent =	-1		10	3973.01	100	1	0	1		Correlation Coefficent =	-0.76224
11	3949.23	99.4	1	0	1		Solution Robustness =	72.0303		11	3973.01	100	1	0	1		Solution Robustness =	1804.44
12	3803.93	95.74	1	0	1		Performance Rate =	0.0065016		12	3972.5	99.99	1	0	1		Performance Rate =	0.0089554
13	3972.5	99.99	1	0	1		Average Elapsed Time =	0.94375		13	3971.46	99.96	1	0	1		Average Elapsed Time =	4.6223
14	3964.59	99.79	1	0	1					14	3973	100	1	0	1
15	3964.3	99.78	1	0	1					15	3972.67	99.99	1	0	1
16	3722.27	93.69	1	0	1					16	3971.98	99.97	1	0	1
17	3898.99	98.14	1	0	1					17	3973.01	100	1	0	1
18	3853.93	97	1	0	1					18	3972.03	99.98	1	0	1
19	3973.01	100	1	0	1					19	3973.01	100	1	0	1
20	3934.98	99.04	1	0	1					20	3973	100	1	0	1
21	3960.09	99.67	1	0	1					21	3972.35	99.98	1	0	1
22	3961.16	99.7	1	0	1					22	3970.73	99.94	1	0	1
23	3893.91	98.01	1	0	1					23	3971.98	99.97	1	0	1
24	3871.86	97.45	1	0	1					24	3972.35	99.98	1	0	1
25	3890.84	97.93	1	0	1					25	3972.35	99.98	1	0	1
26	3959.05	99.65	1	0	1					26	3972.35	99.98	1	0	1
27	3941.59	99.21	1	0	1					27	3972.67	99.99	1	0	1
28	3965.78	99.82	1	0	1					28	3970.09	99.93	1	0	1
29	3817.93	96.1	1	0	1					29	3972.67	99.99	1	0	1
30	3943.26	99.25	1	0	1					30	3972.35	99.98	1	0	1
31	3962.15	99.73	1	0	1					31	3972.67	99.99	1	0	1
32	3945.02	99.3	1	0	1					32	3973	100	1	0	1
33	3711.29	93.41	1	0	1					33	3972.35	99.98	1	0	1
34	3968.36	99.88	1	0	1					34	3972.35	99.98	1	0	1
35	3971.98	99.97	1	0	1					35	3973	100	1	0	1
36	3967.18	99.85	1	0	1					36	3971.98	99.97	1	0	1
37	3969.39	99.91	1	0	1					37	3971.98	99.97	1	0	1
38	3877.89	97.61	1	0	1					38	3973	100	1	0	1
39	3791.41	95.43	1	0	1					39	3972.67	99.99	1	0	1
40	3973	100	1	0	1					40	3970.09	99.93	1	0	1
41	3755.6	94.53	1	0	1					41	3966.86	99.85	1	0	1
42	3972.67	99.99	1	0	1					42	3973.01	100	1	0	1
43	3923.9	98.76	1	0	1					43	3973	100	1	0	1
44	3939.06	99.15	1	0	1					44	3972.67	99.99	1	0	1
45	3964.74	99.79	1	0	1					45	3972.5	99.99	1	0	1
46	3972.35	99.98	1	0	1					46	3967.5	99.86	1	0	1
47	3958.54	99.64	1	0	1					47	3969.44	99.91	1	0	1
48	3961.64	99.71	1	0	1					48	3971.98	99.97	1	0	1
49	3916.53	98.58	1	0	1					49	3973.01	100	1	0	1
50	3971.85	99.97	1	0	1					50	3972.67	99.99	1	0	1
51	3864.96	97.28	1	0	1					51	3970.73	99.94	1	0	1
52	3900.61	98.18	1	0	1					52	3970.41	99.93	1	0	1
53	3951.82	99.47	1	0	1					53	3972.67	99.99	1	0	1
54	3916.26	98.57	1	0	1					54	3972.67	99.99	1	0	1
55	3940.96	99.19	1	0	1					55	3971.98	99.97	1	0	1
56	3950.38	99.43	1	0	1					56	3973	100	1	0	1
57	3964.92	99.8	1	0	1					57	3971.98	99.97	1	0	1
58	3815.39	96.03	1	0	1					58	3968.88	99.9	1	0	1
59	3967.82	99.87	1	0	1					59	3972.5	99.99	1	0	1
60	3972.5	99.99	1	0	1					60	3972.67	99.99	1	0	1
61	3762.33	94.7	1	0	1					61	3972.67	99.99	1	0	1
62	3956.19	99.58	1	0	1					62	3973	100	1	0	1
63	3925.65	98.81	1	0	1					63	3971.98	99.97	1	0	1
64	3941.33	99.2	1	0	1					64	3972.5	99.99	1	0	1
65	3902.19	98.22	1	0	1					65	3973	100	1	0	1
66	3930.62	98.93	1	0	1					66	3972.67	99.99	1	0	1
67	3960.72	99.69	1	0	1					67	3973.01	100	1	0	1
68	3947.56	99.36	1	0	1					68	3972.67	99.99	1	0	1
69	3971.98	99.97	1	0	1					69	3972.67	99.99	1	0	1
70	3915.63	98.56	1	0	1					70	3972.5	99.99	1	0	1
71	3906.32	98.32	1	0	1					71	3973	100	1	0	1
72	3902.19	98.22	1	0	1					72	3971.98	99.97	1	0	1
73	3857.21	97.09	1	0	1					73	3972.5	99.99	1	0	1
74	3943.55	99.26	1	0	1					74	3972.67	99.99	1	0	1
75	3933.57	99.01	1	0	1					75	3973	100	1	0	1
76	3852.04	96.96	1	0	1					76	3968.8	99.89	1	0	1
77	3916.46	98.58	1	0	1					77	3972.5	99.99	1	0	1
78	3945.64	99.31	1	0	1					78	3971.98	99.97	1	0	1
79	3914.13	98.52	1	0	1					79	3972.35	99.98	1	0	1
80	3855.16	97.03	1	0	1					80	3970.73	99.94	1	0	1
81	3904.34	98.27	1	0	1					81	3970.73	99.94	1	0	1
82	3936.76	99.09	1	0	1					82	3972.67	99.99	1	0	1
83	3937.12	99.1	1	0	1					83	3971.98	99.97	1	0	1
84	3813.68	95.99	1	0	1					84	3970.73	99.94	1	0	1
85	3946.32	99.33	1	0	1					85	3971.98	99.97	1	0	1
86	3869.5	97.39	1	0	1					86	3967.84	99.87	1	0	1
87	3962.66	99.74	1	0	1					87	3972.67	99.99	1	0	1
88	3946.65	99.34	1	0	1					88	3968.36	99.88	1	0	1
89	3922.53	98.73	1	0	1					89	3972.67	99.99	1	0	1
90	3893.4	98	1	0	1					90	3973	100	1	0	1
91	3962.67	99.74	1	0	1					91	3971.98	99.97	1	0	1
92	3899.6	98.15	1	0	1					92	3972.67	99.99	1	0	1
93	3968.8	99.89	1	0	1					93	3967.5	99.86	1	0	1
94	3939.32	99.15	1	0	1					94	3972.5	99.99	1	0	1
95	3955.69	99.56	1	0	1					95	3972.67	99.99	1	0	1
96	3970.95	99.95	1	0	1					96	3972.35	99.98	1	0	1
97	3970.95	99.95	1	0	1					97	3972.67	99.99	1	0	1
98	3890.49	97.92	1	0	1					98	3972.35	99.98	1	0	1
99	3897.05	98.09	1	0	1					99	3970.73	99.94	1	0	1
100	3876.46	97.57	1	0	1					100	3967.5	99.86	1	0	1
101	3883.96	97.76	1	0	1					101	3972.67	99.99	1	0	1
102	3959.05	99.65	1	0	1					102	3972.67	99.99	1	0	1
103	3874.43	97.52	1	0	1					103	3973	100	1	0	1
104	3958.78	99.64	1	0	1					104	3973.01	100	1	0	1
105	3923.55	98.76	1	0	1					105	3961.36	99.71	1	0	1
106	3779.56	95.13	1	0	1					106	3970.41	99.93	1	0	1
107	3946.82	99.34	1	0	1					107	3968.88	99.9	1	0	1
108	3836.45	96.56	1	0	1					108	3967.33	99.86	1	0	1
109	3940.03	99.17	1	0	1					109	3971.46	99.96	1	0	1
110	3928.55	98.88	1	0	1					110	3972.35	99.98	1	0	1
111	3917.65	98.61	1	0	1					111	3972.67	99.99	1	0	1
112	3859.8	97.15	1	0	1					112	3973	100	1	0	1
113	3942.76	99.24	1	0	1					113	3972.35	99.98	1	0	1
114	3920.3	98.67	1	0	1					114	3973	100	1	0	1
115	3898.94	98.14	1	0	1					115	3970.41	99.93	1	0	1
116	3816.53	96.06	1	0	1					116	3973.01	100	1	0	1
117	3960.74	99.69	1	0	1					117	3968.8	99.89	1	0	1
118	3939.8	99.16	1	0	1					118	3972.35	99.98	1	0	1
119	3897.38	98.1	1	0	1					119	3972.5	99.99	1	0	1
120	3704.64	93.25	1	0	1					120	3971.06	99.95	1	0	1
121	3972.35	99.98	1	0	1					121	3972.67	99.99	1	0	1
122	3968.82	99.89	1	0	1					122	3972.35	99.98	1	0	1
123	3889.26	97.89	1	0	1					123	3971.98	99.97	1	0	1
124	3890.54	97.92	1	0	1					124	3972.67	99.99	1	0	1
125	3932.23	98.97	1	0	1					125	3973	100	1	0	1
126	3973.01	100	1	0	1					126	3972.5	99.99	1	0	1
127	3908.36	98.37	1	0	1					127	3969.39	99.91	1	0	1
128	3914.08	98.52	1	0	1					128	3972.67	99.99	1	0	1
129	3892.2	97.97	1	0	1					129	3972.5	99.99	1	0	1
130	3940.03	99.17	1	0	1					130	3972.67	99.99	1	0	1
131	3912.59	98.48	1	0	1					131	3964.92	99.8	1	0	1
132	3959.13	99.65	1	0	1					132	3971.98	99.97	1	0	1
133	3924.99	98.79	1	0	1					133	3972.35	99.98	1	0	1
134	3883.11	97.74	1	0	1					134	3972.03	99.98	1	0	1
135	3958.54	99.64	1	0	1					135	3972.5	99.99	1	0	1
136	3972.67	99.99	1	0	1					136	3972.5	99.99	1	0	1
137	3927.52	98.85	1	0	1					137	3973	100	1	0	1
138	3928.03	98.87	1	0	1					138	3973	100	1	0	1
139	3953.28	99.5	1	0	1					139	3972.35	99.98	1	0	1
140	3952.78	99.49	1	0	1					140	3973	100	1	0	1
141	3971.85	99.97	1	0	1					141	3972.67	99.99	1	0	1
142	3959.57	99.66	1	0	1					142	3970.73	99.94	1	0	1
143	3959.57	99.66	1	0	1					143	3972.67	99.99	1	0	1
144	3957.5	99.61	1	0	1					144	3972.03	99.98	1	0	1
145	3881.51	97.7	1	0	1					145	3969.39	99.91	1	0	1
146	3856.97	97.08	1	0	1					146	3971.06	99.95	1	0	1
147	3961.64	99.71	1	0	1					147	3970.73	99.94	1	0	1
148	3956.47	99.58	1	0	1					148	3972.67	99.99	1	0	1
149	3884.09	97.76	1	0	1					149	3973	100	1	0	1
150	3967.82	99.87	1	0	1					150	3972.67	99.99	1	0	1
151	3952.99	99.5	1	0	1					151	3970.73	99.94	1	0	1
152	3965.78	99.82	1	0	1					152	3972.35	99.98	1	0	1
153	3968.36	99.88	1	0	1					153	3971.06	99.95	1	0	1
154	3951.82	99.47	1	0	1					154	3972.5	99.99	1	0	1
155	3915.82	98.56	1	0	1					155	3967.5	99.86	1	0	1
156	3968.88	99.9	1	0	1					156	3972.67	99.99	1	0	1
157	3949.75	99.41	1	0	1					157	3972.35	99.98	1	0	1
158	3972.35	99.98	1	0	1					158	3972.5	99.99	1	0	1
159	3967.18	99.85	1	0	1					159	3973.01	100	1	0	1
160	3904.11	98.27	1	0	1					160	3968.8	99.89	1	0	1
161	3953.75	99.52	1	0	1					161	3973.01	100	1	0	1
162	3923.23	98.75	1	0	1					162	3970.95	99.95	1	0	1
163	3931.65	98.96	1	0	1					163	3973	100	1	0	1
164	3913.04	98.49	1	0	1					164	3973.01	100	1	0	1
165	3940.44	99.18	1	0	1					165	3973.01	100	1	0	1
166	3914	98.51	1	0	1					166	3970.73	99.94	1	0	1
167	3927	98.84	1	0	1					167	3973	100	1	0	1
168	3793.62	95.48	1	0	1					168	3972.35	99.98	1	0	1
169	3873.1	97.49	1	0	1					169	3973	100	1	0	1
170	3919.47	98.65	1	0	1					170	3972.67	99.99	1	0	1
171	3972.35	99.98	1	0	1					171	3972.35	99.98	1	0	1
172	3951.46	99.46	1	0	1					172	3969.12	99.9	1	0	1
173	3935.27	99.05	1	0	1					173	3972.35	99.98	1	0	1
174	3972.03	99.98	1	0	1					174	3971.46	99.96	1	0	1
175	3971.98	99.97	1	0	1					175	3972.67	99.99	1	0	1
176	3961.64	99.71	1	0	1					176	3972.67	99.99	1	0	1
177	3934.49	99.03	1	0	1					177	3972.67	99.99	1	0	1
178	3939.93	99.17	1	0	1					178	3972.35	99.98	1	0	1
179	3934.17	99.02	1	0	1					179	3973.01	100	1	0	1
180	3925.49	98.8	1	0	1					180	3967.18	99.85	1	0	1
181	3914.64	98.53	1	0	1					181	3970.41	99.93	1	0	1
182	3918.21	98.62	1	0	1					182	3972.35	99.98	1	0	1
183	3969.39	99.91	1	0	1					183	3972.35	99.98	1	0	1
184	3955.95	99.57	1	0	1					184	3972.5	99.99	1	0	1
185	3972.5	99.99	1	0	1					185	3973	100	1	0	1
186	3957.48	99.61	1	0	1					186	3971.98	99.97	1	0	1
187	3972.35	99.98	1	0	1					187	3972.67	99.99	1	0	1
188	3946.65	99.34	1	0	1					188	3972.03	99.98	1	0	1
189	3760.21	94.64	1	0	1					189	3971.98	99.97	1	0	1
190	3916.44	98.58	1	0	1					190	3970.43	99.94	1	0	1
191	3877.18	97.59	1	0	1					191	3973	100	1	0	1
192	3899.96	98.16	1	0	1					192	3962.98	99.75	1	0	1
193	3923.88	98.76	1	0	1					193	3972.35	99.98	1	0	1
194	3838.34	96.61	1	0	1					194	3971.06	99.95	1	0	1
195	3891	97.94	1	0	1					195	3971.46	99.96	1	0	1
196	3842.22	96.71	1	0	1					196	3970.41	99.93	1	0	1
197	3915.8	98.56	1	0	1					197	3972.5	99.99	1	0	1
198	3867.48	97.34	1	0	1					198	3970.73	99.94	1	0	1
199	3970.43	99.94	1	0	1					199	3972.5	99.99	1	0	1
200	3787.85	95.34	1	0	1					200	3972.67	99.99	1	0	1

## Sheet: 03_HCFMMACO_Seeds(50)
Fast Converegnce Exp							Fast Converegnce Exp			Slow Converegnce Exp							Slow Converegnce Exp
#	CBLF	Quality	Taumax	Taumin	DeltaTauminmax		Global Optimal Solution =	3972.67		#	CBLF	Quality	Taumax	Taumin	DeltaTauminmax		Global Optimal Solution =	3973.01
1	3952.43	99.48	1	0	1		Minimum Optimal Solution=	3774.75		1	3972.5	99.99	1	0	1		Minimum Optimal Solution =	3959.75
2	3795.83	95.54	1	0	1		Mean of Optimal Solution =	3915.34		2	3966.86	99.85	1	0	1		Mean of Optimal Solution =	3971.84
3	3921.31	98.7	1	0	1		Median of Optimal Solution =	3915.34		3	3970.09	99.93	1	0	1		Median of Optimal Solution =	3971.84
4	3949.73	99.41	1	0	1		Solution Standrad Deviation =	50.4351		4	3973	100	1	0	1		Solution Standrad Deviation =	1.6942
5	3902.57	98.23	1	0	1		Average Price =	20.295		5	3971.98	99.97	1	0	1		Average Price =	101.135
6	3842.22	96.71	1	0	1		Relability =	9.5		6	3972.35	99.98	1	0	1		Relability =	92.5
7	3964.74	99.79	1	0	1		Normalized Price =	213.632		7	3969.44	99.91	1	0	1		Normalized Price =	109.335
8	3909.98	98.41	1	0	1		Average Solution Quality =	98.5484		8	3972.35	99.98	1	0	1		Average Solution Quality =	99.9704
9	3958.54	99.64	1	0	1		Average FDC =	-274.994		9	3972.67	99.99	1	0	1		Average FDC =	-137.425
10	3939.39	99.15	1	0	1		Correlation Coefficent =	-1		10	3973.01	100	1	0	1		Correlation Coefficent =	-0.73153
11	3828.26	96.36	1	0	1		Solution Robustness =	77.6312		11	3973	100	1	0	1		Solution Robustness =	2344.42
12	3930.34	98.93	1	0	1		Performance Rate =	0.0049273		12	3972.67	99.99	1	0	1		Performance Rate =	0.0091462
13	3936.31	99.08	1	0	1		Average Elapsed Time =	0.96226		13	3970.09	99.93	1	0	1		Average Elapsed Time =	4.6187
14	3838.52	96.62	1	0	1					14	3972.67	99.99	1	0	1
15	3965.89	99.82	1	0	1					15	3971.98	99.97	1	0	1
16	3874.27	97.51	1	0	1					16	3972.35	99.98	1	0	1
17	3930.99	98.94	1	0	1					17	3971.06	99.95	1	0	1
18	3940.68	99.19	1	0	1					18	3971.98	99.97	1	0	1
19	3956.84	99.59	1	0	1					19	3969.12	99.9	1	0	1
20	3842.09	96.7	1	0	1					20	3972.35	99.98	1	0	1
21	3963.3	99.76	1	0	1					21	3973	100	1	0	1
22	3967.84	99.87	1	0	1					22	3973.01	100	1	0	1
23	3789.64	95.38	1	0	1					23	3972.35	99.98	1	0	1
24	3902.03	98.21	1	0	1					24	3972.67	99.99	1	0	1
25	3950.7	99.44	1	0	1					25	3973	100	1	0	1
26	3893.36	98	1	0	1					26	3973	100	1	0	1
27	3972.5	99.99	1	0	1					27	3970.73	99.94	1	0	1
28	3909.94	98.41	1	0	1					28	3973	100	1	0	1
29	3911.94	98.46	1	0	1					29	3972.03	99.98	1	0	1
30	3970.41	99.93	1	0	1					30	3973	100	1	0	1
31	3897.07	98.09	1	0	1					31	3970.09	99.93	1	0	1
32	3954.92	99.54	1	0	1					32	3972.67	99.99	1	0	1
33	3971.46	99.96	1	0	1					33	3969.44	99.91	1	0	1
34	3872.78	97.48	1	0	1					34	3973.01	100	1	0	1
35	3885.12	97.79	1	0	1					35	3973	100	1	0	1
36	3814.81	96.02	1	0	1					36	3972.35	99.98	1	0	1
37	3964.62	99.79	1	0	1					37	3973	100	1	0	1
38	3966.53	99.84	1	0	1					38	3972.67	99.99	1	0	1
39	3940.96	99.19	1	0	1					39	3972.5	99.99	1	0	1
40	3952.08	99.47	1	0	1					40	3969.12	99.9	1	0	1
41	3901.51	98.2	1	0	1					41	3973	100	1	0	1
42	3806.79	95.82	1	0	1					42	3972.67	99.99	1	0	1
43	3951.67	99.46	1	0	1					43	3972.67	99.99	1	0	1
44	3856.79	97.07	1	0	1					44	3968.36	99.88	1	0	1
45	3922.26	98.72	1	0	1					45	3972.35	99.98	1	0	1
46	3939.06	99.15	1	0	1					46	3972.67	99.99	1	0	1
47	3972.35	99.98	1	0	1					47	3970.41	99.93	1	0	1
48	3819.26	96.13	1	0	1					48	3972.67	99.99	1	0	1
49	3911.27	98.45	1	0	1					49	3970.41	99.93	1	0	1
50	3871.86	97.45	1	0	1					50	3969.39	99.91	1	0	1
51	3908.04	98.36	1	0	1					51	3972.35	99.98	1	0	1
52	3841.42	96.69	1	0	1					52	3972.67	99.99	1	0	1
53	3972.67	99.99	1	0	1					53	3972.67	99.99	1	0	1
54	3859.57	97.14	1	0	1					54	3972.03	99.98	1	0	1
55	3939.93	99.17	1	0	1					55	3970.73	99.94	1	0	1
56	3972.67	99.99	1	0	1					56	3972.35	99.98	1	0	1
57	3970.73	99.94	1	0	1					57	3972.35	99.98	1	0	1
58	3966.86	99.85	1	0	1					58	3973	100	1	0	1
59	3962.67	99.74	1	0	1					59	3973	100	1	0	1
60	3923.58	98.76	1	0	1					60	3972.5	99.99	1	0	1
61	3949.75	99.41	1	0	1					61	3965.78	99.82	1	0	1
62	3972.35	99.98	1	0	1					62	3972.35	99.98	1	0	1
63	3969.26	99.91	1	0	1					63	3970.73	99.94	1	0	1
64	3907.33	98.35	1	0	1					64	3969.39	99.91	1	0	1
65	3922.24	98.72	1	0	1					65	3970.73	99.94	1	0	1
66	3960.39	99.68	1	0	1					66	3973.01	100	1	0	1
67	3950.19	99.43	1	0	1					67	3972.67	99.99	1	0	1
68	3923.4	98.75	1	0	1					68	3973	100	1	0	1
69	3954.02	99.52	1	0	1					69	3972.35	99.98	1	0	1
70	3786.56	95.31	1	0	1					70	3972.67	99.99	1	0	1
71	3933.36	99	1	0	1					71	3969.12	99.9	1	0	1
72	3949.23	99.4	1	0	1					72	3970.73	99.94	1	0	1
73	3925.63	98.81	1	0	1					73	3972.67	99.99	1	0	1
74	3875.69	97.55	1	0	1					74	3972.5	99.99	1	0	1
75	3927.11	98.84	1	0	1					75	3972.67	99.99	1	0	1
76	3931.7	98.96	1	0	1					76	3972.03	99.98	1	0	1
77	3902.19	98.22	1	0	1					77	3973	100	1	0	1
78	3970.95	99.95	1	0	1					78	3972.67	99.99	1	0	1
79	3959.05	99.65	1	0	1					79	3972.5	99.99	1	0	1
80	3870.45	97.42	1	0	1					80	3973	100	1	0	1
81	3902.19	98.22	1	0	1					81	3972.67	99.99	1	0	1
82	3891.82	97.96	1	0	1					82	3973	100	1	0	1
83	3969.76	99.92	1	0	1					83	3973	100	1	0	1
84	3927.52	98.85	1	0	1					84	3972.67	99.99	1	0	1
85	3935.81	99.06	1	0	1					85	3972.5	99.99	1	0	1
86	3963.97	99.77	1	0	1					86	3973.01	100	1	0	1
87	3934.49	99.03	1	0	1					87	3972.5	99.99	1	0	1
88	3935.27	99.05	1	0	1					88	3972.5	99.99	1	0	1
89	3955.95	99.57	1	0	1					89	3972.35	99.98	1	0	1
90	3972.35	99.98	1	0	1					90	3972.35	99.98	1	0	1
91	3851.5	96.94	1	0	1					91	3968.36	99.88	1	0	1
92	3972.67	99.99	1	0	1					92	3971.46	99.96	1	0	1
93	3848.42	96.86	1	0	1					93	3973.01	100	1	0	1
94	3924.82	98.79	1	0	1					94	3959.75	99.67	1	0	1
95	3968.36	99.88	1	0	1					95	3972.35	99.98	1	0	1
96	3931.14	98.95	1	0	1					96	3973.01	100	1	0	1
97	3972.35	99.98	1	0	1					97	3972.67	99.99	1	0	1
98	3968.36	99.88	1	0	1					98	3971.06	99.95	1	0	1
99	3934.57	99.03	1	0	1					99	3973	100	1	0	1
100	3802.03	95.7	1	0	1					100	3971.46	99.96	1	0	1
101	3863.28	97.24	1	0	1					101	3972.5	99.99	1	0	1
102	3877.99	97.61	1	0	1					102	3972.35	99.98	1	0	1
103	3921.94	98.71	1	0	1					103	3972.5	99.99	1	0	1
104	3899.08	98.14	1	0	1					104	3970.73	99.94	1	0	1
105	3859.06	97.13	1	0	1					105	3973.01	100	1	0	1
106	3964.59	99.79	1	0	1					106	3972.67	99.99	1	0	1
107	3846.89	96.83	1	0	1					107	3971.98	99.97	1	0	1
108	3872.08	97.46	1	0	1					108	3970.41	99.93	1	0	1
109	3912.58	98.48	1	0	1					109	3973	100	1	0	1
110	3929.54	98.91	1	0	1					110	3973	100	1	0	1
111	3950.31	99.43	1	0	1					111	3973	100	1	0	1
112	3902.22	98.22	1	0	1					112	3970.73	99.94	1	0	1
113	3911.21	98.44	1	0	1					113	3973	100	1	0	1
114	3956.01	99.57	1	0	1					114	3971.46	99.96	1	0	1
115	3951.67	99.46	1	0	1					115	3972.67	99.99	1	0	1
116	3892.68	97.98	1	0	1					116	3968.15	99.88	1	0	1
117	3970.09	99.93	1	0	1					117	3971.98	99.97	1	0	1
118	3966.03	99.82	1	0	1					118	3969.39	99.91	1	0	1
119	3814.16	96	1	0	1					119	3973.01	100	1	0	1
120	3875.74	97.55	1	0	1					120	3967.5	99.86	1	0	1
121	3865.8	97.3	1	0	1					121	3968.8	99.89	1	0	1
122	3918.06	98.62	1	0	1					122	3973.01	100	1	0	1
123	3872.82	97.48	1	0	1					123	3971.46	99.96	1	0	1
124	3907.54	98.35	1	0	1					124	3973.01	100	1	0	1
125	3972.5	99.99	1	0	1					125	3973	100	1	0	1
126	3966.86	99.85	1	0	1					126	3972.67	99.99	1	0	1
127	3804.16	95.75	1	0	1					127	3972.5	99.99	1	0	1
128	3928.4	98.88	1	0	1					128	3973.01	100	1	0	1
129	3903	98.24	1	0	1					129	3972.5	99.99	1	0	1
130	3938.74	99.14	1	0	1					130	3972.67	99.99	1	0	1
131	3945.53	99.31	1	0	1					131	3972.5	99.99	1	0	1
132	3863.91	97.25	1	0	1					132	3973	100	1	0	1
133	3968.47	99.89	1	0	1					133	3973	100	1	0	1
134	3890.3	97.92	1	0	1					134	3972.35	99.98	1	0	1
135	3826.72	96.32	1	0	1					135	3972.67	99.99	1	0	1
136	3852.55	96.97	1	0	1					136	3969.12	99.9	1	0	1
137	3902.13	98.22	1	0	1					137	3972.5	99.99	1	0	1
138	3820.39	96.16	1	0	1					138	3972.67	99.99	1	0	1
139	3919.67	98.66	1	0	1					139	3973	100	1	0	1
140	3876.85	97.58	1	0	1					140	3973.01	100	1	0	1
141	3959.05	99.65	1	0	1					141	3973	100	1	0	1
142	3924.78	98.79	1	0	1					142	3972.67	99.99	1	0	1
143	3937.8	99.11	1	0	1					143	3966.86	99.85	1	0	1
144	3956.51	99.58	1	0	1					144	3968.36	99.88	1	0	1
145	3918.15	98.62	1	0	1					145	3972.5	99.99	1	0	1
146	3934.31	99.03	1	0	1					146	3973	100	1	0	1
147	3912.01	98.46	1	0	1					147	3972.35	99.98	1	0	1
148	3939.41	99.15	1	0	1					148	3971.46	99.96	1	0	1
149	3909.66	98.41	1	0	1					149	3972.35	99.98	1	0	1
150	3903.22	98.24	1	0	1					150	3970.09	99.93	1	0	1
151	3962.12	99.73	1	0	1					151	3971.98	99.97	1	0	1
152	3949.73	99.41	1	0	1					152	3971.98	99.97	1	0	1
153	3951.81	99.47	1	0	1					153	3973	100	1	0	1
154	3894.47	98.02	1	0	1					154	3973	100	1	0	1
155	3949.75	99.41	1	0	1					155	3972.67	99.99	1	0	1
156	3936.31	99.08	1	0	1					156	3972.5	99.99	1	0	1
157	3951.34	99.45	1	0	1					157	3972.67	99.99	1	0	1
158	3948.88	99.39	1	0	1					158	3972.35	99.98	1	0	1
159	3948.72	99.39	1	0	1					159	3968.88	99.9	1	0	1
160	3774.75	95.01	1	0	1					160	3972.35	99.98	1	0	1
161	3795.4	95.53	1	0	1					161	3972.67	99.99	1	0	1
162	3964.22	99.78	1	0	1					162	3973.01	100	1	0	1
163	3817.62	96.09	1	0	1					163	3970.73	99.94	1	0	1
164	3963.77	99.77	1	0	1					164	3973	100	1	0	1
165	3864.3	97.26	1	0	1					165	3968.8	99.89	1	0	1
166	3927	98.84	1	0	1					166	3972.35	99.98	1	0	1
167	3952.96	99.5	1	0	1					167	3973	100	1	0	1
168	3889.76	97.9	1	0	1					168	3972.67	99.99	1	0	1
169	3808.25	95.85	1	0	1					169	3968.88	99.9	1	0	1
170	3952.64	99.49	1	0	1					170	3971.06	99.95	1	0	1
171	3967.5	99.86	1	0	1					171	3972.35	99.98	1	0	1
172	3953.37	99.51	1	0	1					172	3972.67	99.99	1	0	1
173	3952.33	99.48	1	0	1					173	3972.5	99.99	1	0	1
174	3916.14	98.57	1	0	1					174	3970.73	99.94	1	0	1
175	3916.66	98.58	1	0	1					175	3973.01	100	1	0	1
176	3936.75	99.09	1	0	1					176	3972.5	99.99	1	0	1
177	3937.34	99.1	1	0	1					177	3973	100	1	0	1
178	3874.78	97.53	1	0	1					178	3972.03	99.98	1	0	1
179	3968.82	99.89	1	0	1					179	3972.67	99.99	1	0	1
180	3952.33	99.48	1	0	1					180	3972.67	99.99	1	0	1
181	3931.14	98.95	1	0	1					181	3970.41	99.93	1	0	1
182	3952.85	99.49	1	0	1					182	3971.46	99.96	1	0	1
183	3957.16	99.6	1	0	1					183	3972.67	99.99	1	0	1
184	3957.16	99.6	1	0	1					184	3972.35	99.98	1	0	1
185	3953.1	99.5	1	0	1					185	3967.5	99.86	1	0	1
186	3971.85	99.97	1	0	1					186	3972.35	99.98	1	0	1
187	3886.16	97.81	1	0	1					187	3972.5	99.99	1	0	1
188	3793.1	95.47	1	0	1					188	3972.5	99.99	1	0	1
189	3949.23	99.4	1	0	1					189	3973	100	1	0	1
190	3970.09	99.93	1	0	1					190	3972.67	99.99	1	0	1
191	3886.16	97.81	1	0	1					191	3972.5	99.99	1	0	1
192	3972.35	99.98	1	0	1					192	3973	100	1	0	1
193	3854.05	97.01	1	0	1					193	3968.88	99.9	1	0	1
194	3949.73	99.41	1	0	1					194	3972.5	99.99	1	0	1
195	3897.52	98.1	1	0	1					195	3970.43	99.94	1	0	1
196	3913.69	98.51	1	0	1					196	3972.67	99.99	1	0	1
197	3816.51	96.06	1	0	1					197	3970.73	99.94	1	0	1
198	3820.44	96.16	1	0	1					198	3972.03	99.98	1	0	1
199	3828.82	96.37	1	0	1					199	3971.46	99.96	1	0	1
200	3842.22	96.71	1	0	1					200	3971.98	99.97	1	0	1

## Sheet: 04_HCFMMACO_Seeds(75)
Fast Converegnce Exp							Fast Converegnce Exp			Slow Converegnce Exp							Slow Converegnce Exp
#	CBLF	Quality	Taumax	Taumin	DeltaTauminmax		Global Optimal Solution =	3973.01		#	CBLF	Quality	Taumax	Taumin	DeltaTauminmax		Global Optimal Solution =	3973.01
1	3970.41	99.93	1	0	1		Minimum Optimal Solution =	3688.77		1	3972.67	99.99	1	0	1		Minimum Optimal Solution =	3959.57
2	3904.14	98.27	1	0	1		Mean of Optimal Solution =	3915.95		2	3972.35	99.98	1	0	1		Mean of Optimal Solution =	3971.71
3	3959.05	99.65	1	0	1		Median of Optimal Solution =	3915.95		3	3973	100	1	0	1		Median of Optimal Solution =	3971.71
4	3880.99	97.68	1	0	1		Solution Standrad Deviation =	56.6673		4	3972.35	99.98	1	0	1		Solution Standrad Deviation =	2.0341
5	3765.36	94.77	1	0	1		Average Price =	19.41		5	3972.67	99.99	1	0	1		Average Price =	101.605
6	3736.53	94.05	1	0	1		Relability =	11		6	3972.67	99.99	1	0	1		Relability =	90.5
7	3968.5	99.89	1	0	1		Normalized Price =	176.454		7	3970.41	99.93	1	0	1		Normalized Price =	112.271
8	3938.09	99.12	1	0	1		Average Solution Quality =	98.5638		8	3972.03	99.98	1	0	1		Average Solution Quality =	99.9674
9	3889.78	97.91	1	0	1		Average FDC =	-294.5		9	3972.67	99.99	1	0	1		Average FDC =	-138.796
10	3942.41	99.23	1	0	1		Correlation Coefficent =	-1		10	3972.67	99.99	1	0	1		Correlation Coefficent =	-0.72358
11	3943.55	99.26	1	0	1		Solution Robustness =	69.1042		11	3972.67	99.99	1	0	1		Solution Robustness =	1952.52
12	3853.96	97	1	0	1		Performance Rate =	0.0056672		12	3973	100	1	0	1		Performance Rate =	0.008907
13	3950.81	99.44	1	0	1		Average Elapsed Time =	0.92206		13	3972.03	99.98	1	0	1		Average Elapsed Time =	4.7444
14	3815.23	96.03	1	0	1					14	3971.98	99.97	1	0	1
15	3973.01	100	1	0	1					15	3969.12	99.9	1	0	1
16	3892.88	97.98	1	0	1					16	3972.67	99.99	1	0	1
17	3970.41	99.93	1	0	1					17	3969.39	99.91	1	0	1
18	3964.22	99.78	1	0	1					18	3972.67	99.99	1	0	1
19	3931.65	98.96	1	0	1					19	3972.67	99.99	1	0	1
20	3943.55	99.26	1	0	1					20	3972.5	99.99	1	0	1
21	3932.16	98.97	1	0	1					21	3972.35	99.98	1	0	1
22	3861.34	97.19	1	0	1					22	3972.35	99.98	1	0	1
23	3939.01	99.14	1	0	1					23	3971.98	99.97	1	0	1
24	3843.73	96.75	1	0	1					24	3972.67	99.99	1	0	1
25	3962.98	99.75	1	0	1					25	3973.01	100	1	0	1
26	3944.97	99.29	1	0	1					26	3971.46	99.96	1	0	1
27	3830.84	96.42	1	0	1					27	3964.92	99.8	1	0	1
28	3894.43	98.02	1	0	1					28	3972.67	99.99	1	0	1
29	3956.86	99.59	1	0	1					29	3970.41	99.93	1	0	1
30	3972.35	99.98	1	0	1					30	3972.67	99.99	1	0	1
31	3823.6	96.24	1	0	1					31	3973	100	1	0	1
32	3970.09	99.93	1	0	1					32	3972.03	99.98	1	0	1
33	3972.67	99.99	1	0	1					33	3973.01	100	1	0	1
34	3965.26	99.8	1	0	1					34	3972.5	99.99	1	0	1
35	3862.92	97.23	1	0	1					35	3968.36	99.88	1	0	1
36	3973	100	1	0	1					36	3973	100	1	0	1
37	3970.95	99.95	1	0	1					37	3973	100	1	0	1
38	3906.1	98.32	1	0	1					38	3972.35	99.98	1	0	1
39	3958.45	99.63	1	0	1					39	3973	100	1	0	1
40	3887.19	97.84	1	0	1					40	3972.03	99.98	1	0	1
41	3846.35	96.81	1	0	1					41	3971.98	99.97	1	0	1
42	3837.05	96.58	1	0	1					42	3972.35	99.98	1	0	1
43	3967.2	99.85	1	0	1					43	3972.5	99.99	1	0	1
44	3944.12	99.27	1	0	1					44	3959.57	99.66	1	0	1
45	3930.62	98.93	1	0	1					45	3970.41	99.93	1	0	1
46	3923.9	98.76	1	0	1					46	3973.01	100	1	0	1
47	3959.42	99.66	1	0	1					47	3972.35	99.98	1	0	1
48	3801.49	95.68	1	0	1					48	3970.43	99.94	1	0	1
49	3963	99.75	1	0	1					49	3967.5	99.86	1	0	1
50	3800.64	95.66	1	0	1					50	3973	100	1	0	1
51	3943.36	99.25	1	0	1					51	3973	100	1	0	1
52	3959.05	99.65	1	0	1					52	3971.98	99.97	1	0	1
53	3947.38	99.35	1	0	1					53	3968.88	99.9	1	0	1
54	3846.38	96.81	1	0	1					54	3972.67	99.99	1	0	1
55	3932.74	98.99	1	0	1					55	3972.35	99.98	1	0	1
56	3970.09	99.93	1	0	1					56	3972.35	99.98	1	0	1
57	3933.2	99	1	0	1					57	3970.73	99.94	1	0	1
58	3761.47	94.68	1	0	1					58	3972.35	99.98	1	0	1
59	3880.47	97.67	1	0	1					59	3973.01	100	1	0	1
60	3855.81	97.05	1	0	1					60	3972.67	99.99	1	0	1
61	3942.76	99.24	1	0	1					61	3972.67	99.99	1	0	1
62	3899.9	98.16	1	0	1					62	3972.35	99.98	1	0	1
63	3940.12	99.17	1	0	1					63	3971.46	99.96	1	0	1
64	3836.44	96.56	1	0	1					64	3972.35	99.98	1	0	1
65	3942.94	99.24	1	0	1					65	3972.5	99.99	1	0	1
66	3902.83	98.23	1	0	1					66	3970.41	99.93	1	0	1
67	3688.77	92.85	1	0	1					67	3973	100	1	0	1
68	3887.13	97.84	1	0	1					68	3970.73	99.94	1	0	1
69	3922.35	98.72	1	0	1					69	3972.03	99.98	1	0	1
70	3942.51	99.23	1	0	1					70	3973.01	100	1	0	1
71	3968.88	99.9	1	0	1					71	3968.36	99.88	1	0	1
72	3937.86	99.12	1	0	1					72	3973	100	1	0	1
73	3904.49	98.28	1	0	1					73	3968.36	99.88	1	0	1
74	3834.66	96.52	1	0	1					74	3968.36	99.88	1	0	1
75	3959.89	99.67	1	0	1					75	3973	100	1	0	1
76	3892.2	97.97	1	0	1					76	3972.67	99.99	1	0	1
77	3840.59	96.67	1	0	1					77	3972.35	99.98	1	0	1
78	3951.37	99.46	1	0	1					78	3969.12	99.9	1	0	1
79	3954.92	99.54	1	0	1					79	3973.01	100	1	0	1
80	3954.34	99.53	1	0	1					80	3972.35	99.98	1	0	1
81	3937.29	99.1	1	0	1					81	3972.5	99.99	1	0	1
82	3764.71	94.76	1	0	1					82	3973	100	1	0	1
83	3949.75	99.41	1	0	1					83	3971.98	99.97	1	0	1
84	3931.65	98.96	1	0	1					84	3972.67	99.99	1	0	1
85	3963.71	99.77	1	0	1					85	3970.43	99.94	1	0	1
86	3972.67	99.99	1	0	1					86	3973	100	1	0	1
87	3953.37	99.51	1	0	1					87	3973	100	1	0	1
88	3891.59	97.95	1	0	1					88	3973	100	1	0	1
89	3972.67	99.99	1	0	1					89	3972.35	99.98	1	0	1
90	3966.86	99.85	1	0	1					90	3972.35	99.98	1	0	1
91	3890.59	97.93	1	0	1					91	3973.01	100	1	0	1
92	3929.07	98.89	1	0	1					92	3973.01	100	1	0	1
93	3900.4	98.17	1	0	1					93	3969.12	99.9	1	0	1
94	3940.71	99.19	1	0	1					94	3972.67	99.99	1	0	1
95	3947.14	99.35	1	0	1					95	3966.86	99.85	1	0	1
96	3939.41	99.15	1	0	1					96	3973	100	1	0	1
97	3938.74	99.14	1	0	1					97	3973	100	1	0	1
98	3957.28	99.6	1	0	1					98	3972.03	99.98	1	0	1
99	3929.69	98.91	1	0	1					99	3973	100	1	0	1
100	3925.97	98.82	1	0	1					100	3972.67	99.99	1	0	1
101	3890.59	97.93	1	0	1					101	3973.01	100	1	0	1
102	3876.61	97.57	1	0	1					102	3971.46	99.96	1	0	1
103	3810.1	95.9	1	0	1					103	3973.01	100	1	0	1
104	3830.32	96.41	1	0	1					104	3971.98	99.97	1	0	1
105	3869.35	97.39	1	0	1					105	3966.29	99.83	1	0	1
106	3954.58	99.54	1	0	1					106	3972.67	99.99	1	0	1
107	3928.35	98.88	1	0	1					107	3970.41	99.93	1	0	1
108	3962.67	99.74	1	0	1					108	3971.98	99.97	1	0	1
109	3936.82	99.09	1	0	1					109	3972.67	99.99	1	0	1
110	3940.18	99.17	1	0	1					110	3971.98	99.97	1	0	1
111	3949.08	99.4	1	0	1					111	3972.67	99.99	1	0	1
112	3943.91	99.27	1	0	1					112	3972.35	99.98	1	0	1
113	3838.08	96.6	1	0	1					113	3972.35	99.98	1	0	1
114	3841.68	96.69	1	0	1					114	3973	100	1	0	1
115	3944.88	99.29	1	0	1					115	3972.35	99.98	1	0	1
116	3950.4	99.43	1	0	1					116	3972.03	99.98	1	0	1
117	3957.51	99.61	1	0	1					117	3972.67	99.99	1	0	1
118	3930.62	98.93	1	0	1					118	3972.67	99.99	1	0	1
119	3970.95	99.95	1	0	1					119	3972.35	99.98	1	0	1
120	3908.04	98.36	1	0	1					120	3970.41	99.93	1	0	1
121	3909.42	98.4	1	0	1					121	3971.46	99.96	1	0	1
122	3963.77	99.77	1	0	1					122	3971.46	99.96	1	0	1
123	3914.97	98.54	1	0	1					123	3973	100	1	0	1
124	3972.5	99.99	1	0	1					124	3972.35	99.98	1	0	1
125	3946.5	99.33	1	0	1					125	3972.67	99.99	1	0	1
126	3813.15	95.98	1	0	1					126	3973.01	100	1	0	1
127	3946.29	99.33	1	0	1					127	3972.35	99.98	1	0	1
128	3861.34	97.19	1	0	1					128	3970.41	99.93	1	0	1
129	3943.03	99.25	1	0	1					129	3973.01	100	1	0	1
130	3904.16	98.27	1	0	1					130	3972.5	99.99	1	0	1
131	3934.8	99.04	1	0	1					131	3972.67	99.99	1	0	1
132	3935.51	99.06	1	0	1					132	3973	100	1	0	1
133	3750.19	94.39	1	0	1					133	3966.86	99.85	1	0	1
134	3955.44	99.56	1	0	1					134	3969.76	99.92	1	0	1
135	3887.19	97.84	1	0	1					135	3967.18	99.85	1	0	1
136	3941	99.19	1	0	1					136	3960.61	99.69	1	0	1
137	3959.05	99.65	1	0	1					137	3973	100	1	0	1
138	3952.78	99.49	1	0	1					138	3968.36	99.88	1	0	1
139	3897.21	98.09	1	0	1					139	3972.35	99.98	1	0	1
140	3870.76	97.43	1	0	1					140	3973	100	1	0	1
141	3952.25	99.48	1	0	1					141	3973.01	100	1	0	1
142	3947.79	99.37	1	0	1					142	3973	100	1	0	1
143	3959.57	99.66	1	0	1					143	3968.36	99.88	1	0	1
144	3921.29	98.7	1	0	1					144	3972.67	99.99	1	0	1
145	3970.41	99.93	1	0	1					145	3972.67	99.99	1	0	1
146	3884.28	97.77	1	0	1					146	3967.84	99.87	1	0	1
147	3909.35	98.4	1	0	1					147	3972.67	99.99	1	0	1
148	3865.66	97.3	1	0	1					148	3972.35	99.98	1	0	1
149	3930.1	98.92	1	0	1					149	3971.98	99.97	1	0	1
150	3914	98.51	1	0	1					150	3970.73	99.94	1	0	1
151	3937.12	99.1	1	0	1					151	3972.35	99.98	1	0	1
152	3844.05	96.75	1	0	1					152	3971.46	99.96	1	0	1
153	3955.07	99.55	1	0	1					153	3972.35	99.98	1	0	1
154	3967.18	99.85	1	0	1					154	3972.5	99.99	1	0	1
155	3964.62	99.79	1	0	1					155	3972.35	99.98	1	0	1
156	3918.06	98.62	1	0	1					156	3972.35	99.98	1	0	1
157	3856.65	97.07	1	0	1					157	3972.67	99.99	1	0	1
158	3895.26	98.04	1	0	1					158	3971.46	99.96	1	0	1
159	3943.94	99.27	1	0	1					159	3972.35	99.98	1	0	1
160	3970.73	99.94	1	0	1					160	3971.98	99.97	1	0	1
161	3915.71	98.56	1	0	1					161	3971.46	99.96	1	0	1
162	3959.57	99.66	1	0	1					162	3971.98	99.97	1	0	1
163	3929.21	98.9	1	0	1					163	3973.01	100	1	0	1
164	3958.54	99.64	1	0	1					164	3973.01	100	1	0	1
165	3965.78	99.82	1	0	1					165	3972.35	99.98	1	0	1
166	3888.79	97.88	1	0	1					166	3966.53	99.84	1	0	1
167	3918.82	98.64	1	0	1					167	3972.67	99.99	1	0	1
168	3945.1	99.3	1	0	1					168	3972.67	99.99	1	0	1
169	3946.65	99.34	1	0	1					169	3972.5	99.99	1	0	1
170	3914.21	98.52	1	0	1					170	3972.67	99.99	1	0	1
171	3972.03	99.98	1	0	1					171	3970.73	99.94	1	0	1
172	3951.34	99.45	1	0	1					172	3969.39	99.91	1	0	1
173	3846.73	96.82	1	0	1					173	3971.46	99.96	1	0	1
174	3965.26	99.8	1	0	1					174	3973.01	100	1	0	1
175	3970.95	99.95	1	0	1					175	3964.92	99.8	1	0	1
176	3890.06	97.91	1	0	1					176	3972.5	99.99	1	0	1
177	3839.18	96.63	1	0	1					177	3972.35	99.98	1	0	1
178	3957.95	99.62	1	0	1					178	3973	100	1	0	1
179	3767.3	94.82	1	0	1					179	3972.35	99.98	1	0	1
180	3871.91	97.46	1	0	1					180	3971.46	99.96	1	0	1
181	3952.96	99.5	1	0	1					181	3973.01	100	1	0	1
182	3971.46	99.96	1	0	1					182	3971.98	99.97	1	0	1
183	3954.58	99.54	1	0	1					183	3972.67	99.99	1	0	1
184	3907.87	98.36	1	0	1					184	3970.73	99.94	1	0	1
185	3971.98	99.97	1	0	1					185	3972.67	99.99	1	0	1
186	3959.57	99.66	1	0	1					186	3973.01	100	1	0	1
187	3966.53	99.84	1	0	1					187	3973.01	100	1	0	1
188	3924.93	98.79	1	0	1					188	3972.5	99.99	1	0	1
189	3966.88	99.85	1	0	1					189	3972.67	99.99	1	0	1
190	3850.98	96.93	1	0	1					190	3972.67	99.99	1	0	1
191	3865.02	97.28	1	0	1					191	3972.67	99.99	1	0	1
192	3768.53	94.85	1	0	1					192	3972.5	99.99	1	0	1
193	3966.88	99.85	1	0	1					193	3972.35	99.98	1	0	1
194	3778.95	95.12	1	0	1					194	3973.01	100	1	0	1
195	3970.73	99.94	1	0	1					195	3972.5	99.99	1	0	1
196	3968.36	99.88	1	0	1					196	3972.67	99.99	1	0	1
197	3836	96.55	1	0	1					197	3965.56	99.81	1	0	1
198	3952.46	99.48	1	0	1					198	3971.46	99.96	1	0	1
199	3971.46	99.96	1	0	1					199	3971.98	99.97	1	0	1
200	3972.35	99.98	1	0	1					200	3973	100	1	0	1

## Sheet: 05_HCFMMACO_Seeds(111)
Fast Converegnce Exp							Fast Converegnce Exp			Slow Converegnce Exp							Slow Converegnce Exp
#	CBLF	Quality	Taumax	Taumin	DeltaTauminmax		Global Optimal Solution =	3973		#	CBLF	Quality	Taumax	Taumin	DeltaTauminmax		Global Optimal Solution =	3973.01
1	3933.72	99.01	1	0	1		Minimum Optimal Solution=	3711.78		1	3972.67	99.99	1	0	1		Minimum Optimal Solution =	3961.69
2	3970.09	99.93	1	0	1		Mean of Optimal Solution =	3914.49		2	3971.98	99.97	1	0	1		Mean of Optimal Solution =	3971.7
3	3962.16	99.73	1	0	1		Median of Optimal Solution =	3914.49		3	3970.41	99.93	1	0	1		Median of Optimal Solution =	3971.7
4	3971.98	99.97	1	0	1		Solution Standrad Deviation=	55.2149		4	3972.5	99.99	1	0	1		Solution Standrad Deviation =	1.8853
5	3958.13	99.63	1	0	1		Average Price =	20.55		5	3972.67	99.99	1	0	1		Average Price =	100.88
6	3889.01	97.89	1	0	1		Relability =	12.5		6	3970.09	99.93	1	0	1		Relability =	91
7	3941.99	99.22	1	0	1		Normalized Price =	164.4		7	3972.5	99.99	1	0	1		Normalized Price =	110.857
8	3963.95	99.77	1	0	1		Average Solution Quality =	98.527		8	3972.35	99.98	1	0	1		Average Solution Quality =	99.9671
9	3950.27	99.43	1	0	1		Average FDC =	-273.433		9	3972.35	99.98	1	0	1		Average FDC =	-138.702
10	3948.2	99.38	1	0	1		Correlation Coefficent =	-1		10	3971.06	99.95	1	0	1		Correlation Coefficent =	-0.73973
11	3959.13	99.65	1	0	1		Solution Robustness =	70.8955		11	3972.35	99.98	1	0	1		Solution Robustness =	2106.63
12	3908.21	98.37	1	0	1		Performance Rate =	0.0060827		12	3972.5	99.99	1	0	1		Performance Rate =	0.0090206
13	3931.14	98.95	1	0	1		Average Elapsed Time =	0.97734		13	3971.98	99.97	1	0	1		Average Elapsed Time =	4.6049
14	3940.68	99.19	1	0	1					14	3972.67	99.99	1	0	1
15	3755.6	94.53	1	0	1					15	3972.67	99.99	1	0	1
16	3959.1	99.65	1	0	1					16	3972.35	99.98	1	0	1
17	3968.8	99.89	1	0	1					17	3973.01	100	1	0	1
18	3896.5	98.07	1	0	1					18	3969.44	99.91	1	0	1
19	3844.2	96.76	1	0	1					19	3973.01	100	1	0	1
20	3814.16	96	1	0	1					20	3973	100	1	0	1
21	3840.15	96.66	1	0	1					21	3971.06	99.95	1	0	1
22	3874.78	97.53	1	0	1					22	3972.67	99.99	1	0	1
23	3824.16	96.25	1	0	1					23	3972.03	99.98	1	0	1
24	3972.35	99.98	1	0	1					24	3971.98	99.97	1	0	1
25	3811.71	95.94	1	0	1					25	3970.73	99.94	1	0	1
26	3910.96	98.44	1	0	1					26	3969.44	99.91	1	0	1
27	3871.86	97.45	1	0	1					27	3972.35	99.98	1	0	1
28	3857.39	97.09	1	0	1					28	3969.39	99.91	1	0	1
29	3884.35	97.77	1	0	1					29	3972.35	99.98	1	0	1
30	3805.39	95.78	1	0	1					30	3968.88	99.9	1	0	1
31	3896.98	98.09	1	0	1					31	3972.67	99.99	1	0	1
32	3930.92	98.94	1	0	1					32	3972.35	99.98	1	0	1
33	3958.78	99.64	1	0	1					33	3972.35	99.98	1	0	1
34	3925.12	98.79	1	0	1					34	3970.73	99.94	1	0	1
35	3796.72	95.56	1	0	1					35	3972.67	99.99	1	0	1
36	3921.61	98.71	1	0	1					36	3972.67	99.99	1	0	1
37	3943.55	99.26	1	0	1					37	3972.67	99.99	1	0	1
38	3711.78	93.42	1	0	1					38	3972.67	99.99	1	0	1
39	3958.57	99.64	1	0	1					39	3973	100	1	0	1
40	3885.42	97.8	1	0	1					40	3973	100	1	0	1
41	3972.35	99.98	1	0	1					41	3972.5	99.99	1	0	1
42	3925.65	98.81	1	0	1					42	3969.44	99.91	1	0	1
43	3873.64	97.5	1	0	1					43	3972.67	99.99	1	0	1
44	3930.48	98.93	1	0	1					44	3973	100	1	0	1
45	3899.6	98.15	1	0	1					45	3973.01	100	1	0	1
46	3972.35	99.98	1	0	1					46	3972.35	99.98	1	0	1
47	3889.78	97.91	1	0	1					47	3972.35	99.98	1	0	1
48	3939.21	99.15	1	0	1					48	3972.67	99.99	1	0	1
49	3956.51	99.58	1	0	1					49	3972.67	99.99	1	0	1
50	3972.5	99.99	1	0	1					50	3972.35	99.98	1	0	1
51	3920.32	98.67	1	0	1					51	3970.41	99.93	1	0	1
52	3908.39	98.37	1	0	1					52	3972.35	99.98	1	0	1
53	3955.95	99.57	1	0	1					53	3972.67	99.99	1	0	1
54	3824.48	96.26	1	0	1					54	3972.67	99.99	1	0	1
55	3902.19	98.22	1	0	1					55	3973	100	1	0	1
56	3973	100	1	0	1					56	3973.01	100	1	0	1
57	3860.7	97.17	1	0	1					57	3971.98	99.97	1	0	1
58	3971.46	99.96	1	0	1					58	3972.35	99.98	1	0	1
59	3945.2	99.3	1	0	1					59	3971.06	99.95	1	0	1
60	3967.33	99.86	1	0	1					60	3968.88	99.9	1	0	1
61	3917.35	98.6	1	0	1					61	3972.35	99.98	1	0	1
62	3840.82	96.67	1	0	1					62	3972.67	99.99	1	0	1
63	3971.98	99.97	1	0	1					63	3965.24	99.8	1	0	1
64	3971.46	99.96	1	0	1					64	3972.67	99.99	1	0	1
65	3933.57	99.01	1	0	1					65	3972.35	99.98	1	0	1
66	3918.21	98.62	1	0	1					66	3972.67	99.99	1	0	1
67	3962.67	99.74	1	0	1					67	3973.01	100	1	0	1
68	3918.08	98.62	1	0	1					68	3972.67	99.99	1	0	1
69	3872.17	97.46	1	0	1					69	3972.67	99.99	1	0	1
70	3968.5	99.89	1	0	1					70	3972.67	99.99	1	0	1
71	3782.12	95.2	1	0	1					71	3967.84	99.87	1	0	1
72	3933.84	99.01	1	0	1					72	3972.35	99.98	1	0	1
73	3851.89	96.95	1	0	1					73	3969.39	99.91	1	0	1
74	3952.57	99.49	1	0	1					74	3972.35	99.98	1	0	1
75	3973	100	1	0	1					75	3972.35	99.98	1	0	1
76	3918.72	98.63	1	0	1					76	3972.67	99.99	1	0	1
77	3917.7	98.61	1	0	1					77	3972.67	99.99	1	0	1
78	3973	100	1	0	1					78	3972.5	99.99	1	0	1
79	3928.67	98.88	1	0	1					79	3972.35	99.98	1	0	1
80	3955.44	99.56	1	0	1					80	3973	100	1	0	1
81	3886.68	97.83	1	0	1					81	3970.73	99.94	1	0	1
82	3779.86	95.14	1	0	1					82	3972.5	99.99	1	0	1
83	3941.65	99.21	1	0	1					83	3968.8	99.89	1	0	1
84	3914.5	98.53	1	0	1					84	3972.5	99.99	1	0	1
85	3934.24	99.02	1	0	1					85	3972.5	99.99	1	0	1
86	3844.65	96.77	1	0	1					86	3970.73	99.94	1	0	1
87	3933.89	99.02	1	0	1					87	3973.01	100	1	0	1
88	3943.03	99.25	1	0	1					88	3969.12	99.9	1	0	1
89	3948.2	99.38	1	0	1					89	3971.98	99.97	1	0	1
90	3960.72	99.69	1	0	1					90	3973.01	100	1	0	1
91	3972.67	99.99	1	0	1					91	3972.5	99.99	1	0	1
92	3919.25	98.65	1	0	1					92	3971.06	99.95	1	0	1
93	3825.28	96.28	1	0	1					93	3973.01	100	1	0	1
94	3751.16	94.42	1	0	1					94	3970.41	99.93	1	0	1
95	3857.95	97.1	1	0	1					95	3970.73	99.94	1	0	1
96	3966.21	99.83	1	0	1					96	3971.46	99.96	1	0	1
97	3972.5	99.99	1	0	1					97	3967.5	99.86	1	0	1
98	3960.61	99.69	1	0	1					98	3970.73	99.94	1	0	1
99	3962.33	99.73	1	0	1					99	3972.35	99.98	1	0	1
100	3829.15	96.38	1	0	1					100	3972.67	99.99	1	0	1
101	3953.7	99.51	1	0	1					101	3972.67	99.99	1	0	1
102	3960.83	99.69	1	0	1					102	3970.73	99.94	1	0	1
103	3896.37	98.07	1	0	1					103	3972.35	99.98	1	0	1
104	3970.43	99.94	1	0	1					104	3966.86	99.85	1	0	1
105	3942.44	99.23	1	0	1					105	3972.5	99.99	1	0	1
106	3868.01	97.36	1	0	1					106	3972.35	99.98	1	0	1
107	3951.02	99.45	1	0	1					107	3969.39	99.91	1	0	1
108	3963.3	99.76	1	0	1					108	3971.46	99.96	1	0	1
109	3924.93	98.79	1	0	1					109	3967.84	99.87	1	0	1
110	3941.33	99.2	1	0	1					110	3972.67	99.99	1	0	1
111	3917.88	98.61	1	0	1					111	3972.5	99.99	1	0	1
112	3890.6	97.93	1	0	1					112	3973	100	1	0	1
113	3941	99.19	1	0	1					113	3972.67	99.99	1	0	1
114	3947.88	99.37	1	0	1					114	3972.35	99.98	1	0	1
115	3960.39	99.68	1	0	1					115	3971.98	99.97	1	0	1
116	3959.57	99.66	1	0	1					116	3970.73	99.94	1	0	1
117	3950.27	99.43	1	0	1					117	3972.5	99.99	1	0	1
118	3926.58	98.83	1	0	1					118	3973.01	100	1	0	1
119	3959.05	99.65	1	0	1					119	3971.46	99.96	1	0	1
120	3966.86	99.85	1	0	1					120	3966.86	99.85	1	0	1
121	3841.86	96.7	1	0	1					121	3970.09	99.93	1	0	1
122	3955.44	99.56	1	0	1					122	3972.67	99.99	1	0	1
123	3842.14	96.71	1	0	1					123	3964.92	99.8	1	0	1
124	3862.01	97.21	1	0	1					124	3971.98	99.97	1	0	1
125	3877.75	97.6	1	0	1					125	3972.35	99.98	1	0	1
126	3927.75	98.86	1	0	1					126	3973	100	1	0	1
127	3970.09	99.93	1	0	1					127	3972.67	99.99	1	0	1
128	3963.33	99.76	1	0	1					128	3972.5	99.99	1	0	1
129	3836.59	96.57	1	0	1					129	3963.19	99.75	1	0	1
130	3869.49	97.39	1	0	1					130	3972.67	99.99	1	0	1
131	3891.28	97.94	1	0	1					131	3973	100	1	0	1
132	3896.5	98.07	1	0	1					132	3971.46	99.96	1	0	1
133	3921.83	98.71	1	0	1					133	3973	100	1	0	1
134	3964.27	99.78	1	0	1					134	3973	100	1	0	1
135	3909.93	98.41	1	0	1					135	3972.35	99.98	1	0	1
136	3930.62	98.93	1	0	1					136	3972.5	99.99	1	0	1
137	3881.22	97.69	1	0	1					137	3972.5	99.99	1	0	1
138	3921.29	98.7	1	0	1					138	3972.67	99.99	1	0	1
139	3860.95	97.18	1	0	1					139	3973	100	1	0	1
140	3971.98	99.97	1	0	1					140	3973	100	1	0	1
141	3858.24	97.11	1	0	1					141	3972.5	99.99	1	0	1
142	3866.78	97.33	1	0	1					142	3972.5	99.99	1	0	1
143	3941.77	99.21	1	0	1					143	3972.35	99.98	1	0	1
144	3956.51	99.58	1	0	1					144	3972.5	99.99	1	0	1
145	3895.13	98.04	1	0	1					145	3972.35	99.98	1	0	1
146	3956.95	99.6	1	0	1					146	3973	100	1	0	1
147	3865.61	97.3	1	0	1					147	3973.01	100	1	0	1
148	3848.38	96.86	1	0	1					148	3972.67	99.99	1	0	1
149	3954.4	99.53	1	0	1					149	3972.67	99.99	1	0	1
150	3949.23	99.4	1	0	1					150	3973	100	1	0	1
151	3833.14	96.48	1	0	1					151	3972.67	99.99	1	0	1
152	3932.42	98.98	1	0	1					152	3971.46	99.96	1	0	1
153	3955.55	99.56	1	0	1					153	3973	100	1	0	1
154	3952.96	99.5	1	0	1					154	3972.5	99.99	1	0	1
155	3967.84	99.87	1	0	1					155	3971.46	99.96	1	0	1
156	3958.02	99.62	1	0	1					156	3972.5	99.99	1	0	1
157	3926.09	98.82	1	0	1					157	3971.06	99.95	1	0	1
158	3972.03	99.98	1	0	1					158	3972.67	99.99	1	0	1
159	3920.8	98.69	1	0	1					159	3971.98	99.97	1	0	1
160	3963.71	99.77	1	0	1					160	3973.01	100	1	0	1
161	3959.1	99.65	1	0	1					161	3972.35	99.98	1	0	1
162	3901.39	98.2	1	0	1					162	3973	100	1	0	1
163	3877.02	97.58	1	0	1					163	3973	100	1	0	1
164	3970.09	99.93	1	0	1					164	3972.67	99.99	1	0	1
165	3878.4	97.62	1	0	1					165	3970.73	99.94	1	0	1
166	3952.99	99.5	1	0	1					166	3972.5	99.99	1	0	1
167	3961.64	99.71	1	0	1					167	3971.06	99.95	1	0	1
168	3895.93	98.06	1	0	1					168	3972.5	99.99	1	0	1
169	3868.06	97.36	1	0	1					169	3972.35	99.98	1	0	1
170	3965.7	99.82	1	0	1					170	3971.98	99.97	1	0	1
171	3964.27	99.78	1	0	1					171	3968.88	99.9	1	0	1
172	3965.78	99.82	1	0	1					172	3972.35	99.98	1	0	1
173	3728.32	93.84	1	0	1					173	3970.09	99.93	1	0	1
174	3822.97	96.22	1	0	1					174	3972.67	99.99	1	0	1
175	3941.48	99.21	1	0	1					175	3971.98	99.97	1	0	1
176	3970.95	99.95	1	0	1					176	3972.03	99.98	1	0	1
177	3969.91	99.92	1	0	1					177	3967.5	99.86	1	0	1
178	3914.89	98.54	1	0	1					178	3973.01	100	1	0	1
179	3802.36	95.7	1	0	1					179	3973.01	100	1	0	1
180	3925.08	98.79	1	0	1					180	3972.03	99.98	1	0	1
181	3842.27	96.71	1	0	1					181	3971.98	99.97	1	0	1
182	3970.41	99.93	1	0	1					182	3971.98	99.97	1	0	1
183	3884.61	97.77	1	0	1					183	3972.67	99.99	1	0	1
184	3865.48	97.29	1	0	1					184	3972.67	99.99	1	0	1
185	3970.95	99.95	1	0	1					185	3968.88	99.9	1	0	1
186	3943.03	99.25	1	0	1					186	3973	100	1	0	1
187	3872.2	97.46	1	0	1					187	3973.01	100	1	0	1
188	3943.59	99.26	1	0	1					188	3972.35	99.98	1	0	1
189	3926.23	98.82	1	0	1					189	3963.19	99.75	1	0	1
190	3864.3	97.26	1	0	1					190	3971.46	99.96	1	0	1
191	3900.96	98.19	1	0	1					191	3972.35	99.98	1	0	1
192	3859.57	97.14	1	0	1					192	3972.35	99.98	1	0	1
193	3890.94	97.93	1	0	1					193	3972.35	99.98	1	0	1
194	3972.35	99.98	1	0	1					194	3966.86	99.85	1	0	1
195	3929.72	98.91	1	0	1					195	3973	100	1	0	1
196	3758.25	94.59	1	0	1					196	3961.68	99.71	1	0	1
197	3961.07	99.7	1	0	1					197	3971.98	99.97	1	0	1
198	3865.7	97.3	1	0	1					198	3968.36	99.88	1	0	1
199	3973	100	1	0	1					199	3972.35	99.98	1	0	1
200	3925.17	98.8	1	0	1					200	3972.67	99.99	1	0	1

## Sheet: 06_HCFMMACO_Seeds(200)
Fast Converegnce Exp							Fast Converegnce Exp			Slow Converegnce Exp							Slow Converegnce Exp
#	CBLF	Quality	Taumax	Taumin	DeltaTauminmax		Global Optimal Solution =	3973.01		#	CBLF	Quality	Taumax	Taumin	DeltaTauminmax		Global Optimal Solution =	3973.01
1	3803.57	95.74	1	0	1		Minimum Optimal Solution =	3665.1		1	3973	100	1	0	1		Minimum Optimal Solution =	3961.36
2	3957.16	99.6	1	0	1		Mean of Optimal Solution =	3912.53		2	3972.67	99.99	1	0	1		Mean of Optimal Solution =	3971.64
3	3971.98	99.97	1	0	1		Median of Optimal Solution =	3912.53		3	3973.01	100	1	0	1		Median of Optimal Solution =	3971.64
4	3910.62	98.43	1	0	1		Solution Standrad Deviation =	61.5962		4	3972.35	99.98	1	0	1		Solution Standrad Deviation =	1.9599
5	3871.51	97.45	1	0	1		Average Price =	21.62		5	3969.39	99.91	1	0	1		Average Price =	101.125
6	3854.02	97.01	1	0	1		Relability =	15.5		6	3972.67	99.99	1	0	1		Relability =	88.5
7	3894.79	98.03	1	0	1		Normalized Price =	139.484		7	3970.09	99.93	1	0	1		Normalized Price =	114.266
8	3848.93	96.88	1	0	1		Average Solution Quality =	98.4778		8	3972.35	99.98	1	0	1		Average Solution Quality =	99.9655
9	3867.32	97.34	1	0	1		Average FDC =	-264.352		9	3961.36	99.71	1	0	1		Average FDC =	-138.293
10	3785.97	95.29	1	0	1		Correlation Coefficent =	-1		10	3973	100	1	0	1		Correlation Coefficent =	-0.7324
11	3949.11	99.4	1	0	1		Solution Robustness =	63.5191		11	3972.5	99.99	1	0	1		Solution Robustness =	2026.41
12	3961.12	99.7	1	0	1		Performance Rate =	0.0071693		12	3971.06	99.95	1	0	1		Performance Rate =	0.0087515
13	3925.31	98.8	1	0	1		Average Elapsed Time =	1.0229		13	3968.36	99.88	1	0	1		Average Elapsed Time =	4.727
14	3972.03	99.98	1	0	1					14	3972.67	99.99	1	0	1
15	3921.8	98.71	1	0	1					15	3972.35	99.98	1	0	1
16	3954.58	99.54	1	0	1					16	3969.44	99.91	1	0	1
17	3911.44	98.45	1	0	1					17	3972.03	99.98	1	0	1
18	3957.95	99.62	1	0	1					18	3972.67	99.99	1	0	1
19	3971.46	99.96	1	0	1					19	3971.98	99.97	1	0	1
20	3863.12	97.23	1	0	1					20	3972.67	99.99	1	0	1
21	3960.21	99.68	1	0	1					21	3972.67	99.99	1	0	1
22	3722.11	93.68	1	0	1					22	3972.5	99.99	1	0	1
23	3933.41	99	1	0	1					23	3970.95	99.95	1	0	1
24	3875.3	97.54	1	0	1					24	3972.67	99.99	1	0	1
25	3905.6	98.3	1	0	1					25	3971.98	99.97	1	0	1
26	3895.2	98.04	1	0	1					26	3970.73	99.94	1	0	1
27	3892.85	97.98	1	0	1					27	3971.98	99.97	1	0	1
28	3873.6	97.5	1	0	1					28	3971.98	99.97	1	0	1
29	3962.67	99.74	1	0	1					29	3971.46	99.96	1	0	1
30	3916.86	98.59	1	0	1					30	3967.84	99.87	1	0	1
31	3888.16	97.86	1	0	1					31	3972.67	99.99	1	0	1
32	3888.12	97.86	1	0	1					32	3973.01	100	1	0	1
33	3933.72	99.01	1	0	1					33	3973.01	100	1	0	1
34	3972.35	99.98	1	0	1					34	3971.98	99.97	1	0	1
35	3962.77	99.74	1	0	1					35	3973.01	100	1	0	1
36	3930.43	98.93	1	0	1					36	3972.67	99.99	1	0	1
37	3940.96	99.19	1	0	1					37	3972.03	99.98	1	0	1
38	3972.35	99.98	1	0	1					38	3973	100	1	0	1
39	3969.76	99.92	1	0	1					39	3972.35	99.98	1	0	1
40	3915.63	98.56	1	0	1					40	3973.01	100	1	0	1
41	3870.13	97.41	1	0	1					41	3972.5	99.99	1	0	1
42	3931.31	98.95	1	0	1					42	3971.98	99.97	1	0	1
43	3928.34	98.88	1	0	1					43	3972.67	99.99	1	0	1
44	3746.97	94.31	1	0	1					44	3972.67	99.99	1	0	1
45	3829.53	96.39	1	0	1					45	3971.46	99.96	1	0	1
46	3884.09	97.76	1	0	1					46	3972.67	99.99	1	0	1
47	3761.95	94.69	1	0	1					47	3972.5	99.99	1	0	1
48	3971.46	99.96	1	0	1					48	3972.67	99.99	1	0	1
49	3928.03	98.87	1	0	1					49	3973	100	1	0	1
50	3970.09	99.93	1	0	1					50	3972.03	99.98	1	0	1
51	3972.35	99.98	1	0	1					51	3972.35	99.98	1	0	1
52	3962.66	99.74	1	0	1					52	3963.71	99.77	1	0	1
53	3922.05	98.72	1	0	1					53	3967.5	99.86	1	0	1
54	3927.52	98.85	1	0	1					54	3972.03	99.98	1	0	1
55	3959.05	99.65	1	0	1					55	3972.35	99.98	1	0	1
56	3972.03	99.98	1	0	1					56	3973	100	1	0	1
57	3968.36	99.88	1	0	1					57	3973	100	1	0	1
58	3971.06	99.95	1	0	1					58	3970.41	99.93	1	0	1
59	3882.14	97.71	1	0	1					59	3972.67	99.99	1	0	1
60	3843.62	96.74	1	0	1					60	3973.01	100	1	0	1
61	3801.68	95.69	1	0	1					61	3972.67	99.99	1	0	1
62	3934.76	99.04	1	0	1					62	3973.01	100	1	0	1
63	3874.78	97.53	1	0	1					63	3972.5	99.99	1	0	1
64	3665.1	92.25	1	0	1					64	3972.35	99.98	1	0	1
65	3881.18	97.69	1	0	1					65	3970.73	99.94	1	0	1
66	3965.78	99.82	1	0	1					66	3972.35	99.98	1	0	1
67	3940.44	99.18	1	0	1					67	3968.88	99.9	1	0	1
68	3927.52	98.85	1	0	1					68	3972.67	99.99	1	0	1
69	3913.37	98.5	1	0	1					69	3971.98	99.97	1	0	1
70	3892.04	97.96	1	0	1					70	3973.01	100	1	0	1
71	3920.8	98.69	1	0	1					71	3972.35	99.98	1	0	1
72	3927.5	98.85	1	0	1					72	3972.35	99.98	1	0	1
73	3930.1	98.92	1	0	1					73	3972.67	99.99	1	0	1
74	3928.86	98.89	1	0	1					74	3967.84	99.87	1	0	1
75	3667.41	92.31	1	0	1					75	3972.35	99.98	1	0	1
76	3949.75	99.41	1	0	1					76	3972.35	99.98	1	0	1
77	3791.43	95.43	1	0	1					77	3967.5	99.86	1	0	1
78	3929.67	98.91	1	0	1					78	3972.67	99.99	1	0	1
79	3806.03	95.8	1	0	1					79	3973	100	1	0	1
80	3900.44	98.17	1	0	1					80	3972.35	99.98	1	0	1
81	3970.41	99.93	1	0	1					81	3972.67	99.99	1	0	1
82	3858.88	97.13	1	0	1					82	3971.98	99.97	1	0	1
83	3933.57	99.01	1	0	1					83	3970.73	99.94	1	0	1
84	3964.27	99.78	1	0	1					84	3973.01	100	1	0	1
85	3946.13	99.32	1	0	1					85	3972.5	99.99	1	0	1
86	3917.7	98.61	1	0	1					86	3970.09	99.93	1	0	1
87	3756.35	94.55	1	0	1					87	3970.09	99.93	1	0	1
88	3971.06	99.95	1	0	1					88	3972.67	99.99	1	0	1
89	3900.84	98.18	1	0	1					89	3973.01	100	1	0	1
90	3958.45	99.63	1	0	1					90	3970.41	99.93	1	0	1
91	3943.08	99.25	1	0	1					91	3972.03	99.98	1	0	1
92	3829.84	96.4	1	0	1					92	3972.67	99.99	1	0	1
93	3946.82	99.34	1	0	1					93	3963.62	99.76	1	0	1
94	3920	98.67	1	0	1					94	3972.67	99.99	1	0	1
95	3928.03	98.87	1	0	1					95	3972.5	99.99	1	0	1
96	3931.75	98.96	1	0	1					96	3973	100	1	0	1
97	3798.42	95.61	1	0	1					97	3971.98	99.97	1	0	1
98	3948.58	99.39	1	0	1					98	3968.88	99.9	1	0	1
99	3918.06	98.62	1	0	1					99	3972.35	99.98	1	0	1
100	3962.16	99.73	1	0	1					100	3972.67	99.99	1	0	1
101	3902.46	98.22	1	0	1					101	3972.5	99.99	1	0	1
102	3951.02	99.45	1	0	1					102	3972.67	99.99	1	0	1
103	3906.56	98.33	1	0	1					103	3972.67	99.99	1	0	1
104	3945.2	99.3	1	0	1					104	3973	100	1	0	1
105	3811.71	95.94	1	0	1					105	3973	100	1	0	1
106	3928.54	98.88	1	0	1					106	3971.06	99.95	1	0	1
107	3862.49	97.22	1	0	1					107	3972.35	99.98	1	0	1
108	3973	100	1	0	1					108	3968.36	99.88	1	0	1
109	3966.21	99.83	1	0	1					109	3972.5	99.99	1	0	1
110	3972.35	99.98	1	0	1					110	3972.5	99.99	1	0	1
111	3869.22	97.39	1	0	1					111	3973.01	100	1	0	1
112	3953.86	99.52	1	0	1					112	3972.5	99.99	1	0	1
113	3952.96	99.5	1	0	1					113	3968.8	99.89	1	0	1
114	3857.24	97.09	1	0	1					114	3971.98	99.97	1	0	1
115	3954.58	99.54	1	0	1					115	3972.67	99.99	1	0	1
116	3803.57	95.74	1	0	1					116	3972.5	99.99	1	0	1
117	3924.99	98.79	1	0	1					117	3972.35	99.98	1	0	1
118	3823.09	96.23	1	0	1					118	3973	100	1	0	1
119	3956.33	99.58	1	0	1					119	3971.98	99.97	1	0	1
120	3964.59	99.79	1	0	1					120	3973.01	100	1	0	1
121	3939	99.14	1	0	1					121	3972.35	99.98	1	0	1
122	3972.67	99.99	1	0	1					122	3969.76	99.92	1	0	1
123	3924.29	98.77	1	0	1					123	3972.35	99.98	1	0	1
124	3972.35	99.98	1	0	1					124	3972.03	99.98	1	0	1
125	3832.76	96.47	1	0	1					125	3972.35	99.98	1	0	1
126	3837.04	96.58	1	0	1					126	3972.35	99.98	1	0	1
127	3879.23	97.64	1	0	1					127	3967.5	99.86	1	0	1
128	3907.87	98.36	1	0	1					128	3973.01	100	1	0	1
129	3750.57	94.4	1	0	1					129	3973.01	100	1	0	1
130	3699.08	93.11	1	0	1					130	3969.39	99.91	1	0	1
131	3927.52	98.85	1	0	1					131	3972.03	99.98	1	0	1
132	3921.31	98.7	1	0	1					132	3970.41	99.93	1	0	1
133	3850.35	96.91	1	0	1					133	3971.98	99.97	1	0	1
134	3914.97	98.54	1	0	1					134	3972.03	99.98	1	0	1
135	3915.8	98.56	1	0	1					135	3972.35	99.98	1	0	1
136	3869.61	97.4	1	0	1					136	3968.88	99.9	1	0	1
137	3926.3	98.82	1	0	1					137	3967.5	99.86	1	0	1
138	3894.61	98.03	1	0	1					138	3972.35	99.98	1	0	1
139	3929.69	98.91	1	0	1					139	3973.01	100	1	0	1
140	3898.49	98.12	1	0	1					140	3971.98	99.97	1	0	1
141	3971.98	99.97	1	0	1					141	3973.01	100	1	0	1
142	3882.87	97.73	1	0	1					142	3972.35	99.98	1	0	1
143	3963.44	99.76	1	0	1					143	3972.5	99.99	1	0	1
144	3970.43	99.94	1	0	1					144	3972.67	99.99	1	0	1
145	3823.49	96.24	1	0	1					145	3971.06	99.95	1	0	1
146	3971.46	99.96	1	0	1					146	3972.67	99.99	1	0	1
147	3915.27	98.55	1	0	1					147	3972.03	99.98	1	0	1
148	3842.84	96.72	1	0	1					148	3972.35	99.98	1	0	1
149	3904.16	98.27	1	0	1					149	3972.35	99.98	1	0	1
150	3954.07	99.52	1	0	1					150	3973.01	100	1	0	1
151	3900.93	98.19	1	0	1					151	3973	100	1	0	1
152	3932.74	98.99	1	0	1					152	3970.73	99.94	1	0	1
153	3913.56	98.5	1	0	1					153	3972.67	99.99	1	0	1
154	3865.48	97.29	1	0	1					154	3972.03	99.98	1	0	1
155	3944.97	99.29	1	0	1					155	3973	100	1	0	1
156	3964.74	99.79	1	0	1					156	3970.73	99.94	1	0	1
157	3973.01	100	1	0	1					157	3972.67	99.99	1	0	1
158	3972.67	99.99	1	0	1					158	3972.35	99.98	1	0	1
159	3894.95	98.04	1	0	1					159	3972.35	99.98	1	0	1
160	3842.44	96.71	1	0	1					160	3972.5	99.99	1	0	1
161	3958.45	99.63	1	0	1					161	3968.88	99.9	1	0	1
162	3972.67	99.99	1	0	1					162	3970.09	99.93	1	0	1
163	3955.02	99.55	1	0	1					163	3971.98	99.97	1	0	1
164	3963.19	99.75	1	0	1					164	3970.09	99.93	1	0	1
165	3818.48	96.11	1	0	1					165	3972.5	99.99	1	0	1
166	3973.01	100	1	0	1					166	3970.09	99.93	1	0	1
167	3923.9	98.76	1	0	1					167	3968.88	99.9	1	0	1
168	3972.35	99.98	1	0	1					168	3972.67	99.99	1	0	1
169	3968.88	99.9	1	0	1					169	3971.98	99.97	1	0	1
170	3824.64	96.27	1	0	1					170	3972.35	99.98	1	0	1
171	3973.01	100	1	0	1					171	3972.5	99.99	1	0	1
172	3958.54	99.64	1	0	1					172	3972.35	99.98	1	0	1
173	3935.3	99.05	1	0	1					173	3973.01	100	1	0	1
174	3941.59	99.21	1	0	1					174	3972.35	99.98	1	0	1
175	3973.01	100	1	0	1					175	3972.67	99.99	1	0	1
176	3940.5	99.18	1	0	1					176	3971.98	99.97	1	0	1
177	3865.84	97.3	1	0	1					177	3972.67	99.99	1	0	1
178	3958.45	99.63	1	0	1					178	3973	100	1	0	1
179	3954.19	99.53	1	0	1					179	3972.35	99.98	1	0	1
180	3917.3	98.6	1	0	1					180	3967.84	99.87	1	0	1
181	3972.35	99.98	1	0	1					181	3972.67	99.99	1	0	1
182	3875.08	97.54	1	0	1					182	3972.5	99.99	1	0	1
183	3947.14	99.35	1	0	1					183	3971.46	99.96	1	0	1
184	3936.82	99.09	1	0	1					184	3971.46	99.96	1	0	1
185	3934.15	99.02	1	0	1					185	3965.26	99.8	1	0	1
186	3948.88	99.39	1	0	1					186	3971.98	99.97	1	0	1
187	3950.27	99.43	1	0	1					187	3968.36	99.88	1	0	1
188	3954.92	99.54	1	0	1					188	3972.67	99.99	1	0	1
189	3931.65	98.96	1	0	1					189	3973.01	100	1	0	1
190	3960.09	99.67	1	0	1					190	3971.46	99.96	1	0	1
191	3931.65	98.96	1	0	1					191	3972.5	99.99	1	0	1
192	3833.67	96.49	1	0	1					192	3971.06	99.95	1	0	1
193	3963.62	99.76	1	0	1					193	3972.67	99.99	1	0	1
194	3949.23	99.4	1	0	1					194	3972.67	99.99	1	0	1
195	3870.37	97.42	1	0	1					195	3972.5	99.99	1	0	1
196	3947.58	99.36	1	0	1					196	3972.35	99.98	1	0	1
197	3962.67	99.74	1	0	1					197	3961.36	99.71	1	0	1
198	3972.35	99.98	1	0	1					198	3968.8	99.89	1	0	1
199	3973.01	100	1	0	1					199	3968.8	99.89	1	0	1
200	3971.98	99.97	1	0	1					200	3972.5	99.99	1	0	1

## Sheet: 07_HCFMMACO_Seeds(167)
Fast Converegnce Exp							Fast Converegnce Exp			Slow Converegnce Exp							Slow Converegnce Exp
1	3937.34	99.1	3.13838	0.01962	3.11876		Global Optimal Solution =	3973.01		#	CBLF	Quality	Taumax	Taumin	DeltaTauminmax		Global Optimal Solution =	3973.01
1	3959.1	99.65	1	0	1		Minimum Optimal Solution =	3743.47		1	3972.35	99.98	1	0	1		Minimum Optimal Solution =	3963.62
2	3844.07	96.75	1	0	1		Mean of Optimal Solution =	3920.87		2	3972.67	99.99	1	0	1		Mean of Optimal Solution =	3971.75
3	3893.42	98	1	0	1		Median of Optimal Solution=	3920.87		3	3972.67	99.99	1	0	1		Median of Optimal Solution =	3971.75
4	3966.86	99.85	1	0	1		Solution Standrad Deviation =	53.9567		4	3972.67	99.99	1	0	1		Solution Standrad Deviation =	1.7658
5	3941.33	99.2	1	0	1		Average Price =	21.695		5	3971.98	99.97	1	0	1		Average Price =	101.65
6	3945.1	99.3	1	0	1		Relability =	14.5		6	3972.67	99.99	1	0	1		Relability =	90
7	3950.19	99.43	1	0	1		Normalized Price =	149.621		7	3971.98	99.97	1	0	1		Normalized Price =	112.944
8	3923.9	98.76	1	0	1		Average Solution Quality =	98.6875		8	3973.01	100	1	0	1		Average Solution Quality =	99.9683
9	3923.99	98.77	1	0	1		Average FDC =	-268.923		9	3972.67	99.99	1	0	1		Average FDC =	-137.946
10	3868.05	97.36	1	0	1		Correlation Coefficent =	-1		10	3972.67	99.99	1	0	1		Correlation Coefficent =	-0.74763
11	3968.88	99.9	1	0	1		Solution Robustness =	72.6669		11	3972.67	99.99	1	0	1		Solution Robustness =	2249.29
12	3935.53	99.06	1	0	1		Performance Rate =	0.0066836		12	3973.01	100	1	0	1		Performance Rate =	0.0088539
13	3912.01	98.46	1	0	1		Average Elapsed Time =	1.0233		13	3972.35	99.98	1	0	1		Average Elapsed Time =	4.657
14	3774.72	95.01	1	0	1					14	3970.73	99.94	1	0	1
15	3917.7	98.61	1	0	1					15	3972.67	99.99	1	0	1
16	3917.5	98.6	1	0	1					16	3971.98	99.97	1	0	1
17	3943.59	99.26	1	0	1					17	3972.67	99.99	1	0	1
18	3968.36	99.88	1	0	1					18	3972.67	99.99	1	0	1
19	3952.66	99.49	1	0	1					19	3972.67	99.99	1	0	1
20	3962.67	99.74	1	0	1					20	3973	100	1	0	1
21	3940.5	99.18	1	0	1					21	3972.67	99.99	1	0	1
22	3958.13	99.63	1	0	1					22	3972.35	99.98	1	0	1
23	3960.53	99.69	1	0	1					23	3972.67	99.99	1	0	1
24	3815.46	96.03	1	0	1					24	3971.98	99.97	1	0	1
25	3972.35	99.98	1	0	1					25	3971.98	99.97	1	0	1
26	3945.1	99.3	1	0	1					26	3968.88	99.9	1	0	1
27	3960.83	99.69	1	0	1					27	3972.03	99.98	1	0	1
28	3972.35	99.98	1	0	1					28	3969.39	99.91	1	0	1
29	3843.41	96.74	1	0	1					29	3971.46	99.96	1	0	1
30	3907.07	98.34	1	0	1					30	3973	100	1	0	1
31	3878.56	97.62	1	0	1					31	3972.67	99.99	1	0	1
32	3952.43	99.48	1	0	1					32	3973	100	1	0	1
33	3970.41	99.93	1	0	1					33	3963.62	99.76	1	0	1
34	3962.67	99.74	1	0	1					34	3971.46	99.96	1	0	1
35	3970.73	99.94	1	0	1					35	3973.01	100	1	0	1
36	3951.93	99.47	1	0	1					36	3972.35	99.98	1	0	1
37	3968.47	99.89	1	0	1					37	3971.98	99.97	1	0	1
38	3891.04	97.94	1	0	1					38	3970.41	99.93	1	0	1
39	3842.56	96.72	1	0	1					39	3965.24	99.8	1	0	1
40	3931.26	98.95	1	0	1					40	3972.35	99.98	1	0	1
41	3968.47	99.89	1	0	1					41	3972.67	99.99	1	0	1
42	3973.01	100	1	0	1					42	3972.67	99.99	1	0	1
43	3945.61	99.31	1	0	1					43	3972.35	99.98	1	0	1
44	3840.66	96.67	1	0	1					44	3968.8	99.89	1	0	1
45	3973.01	100	1	0	1					45	3973.01	100	1	0	1
46	3967.67	99.87	1	0	1					46	3969.76	99.92	1	0	1
47	3877.89	97.61	1	0	1					47	3971.98	99.97	1	0	1
48	3900.25	98.17	1	0	1					48	3970.41	99.93	1	0	1
49	3944.79	99.29	1	0	1					49	3972.67	99.99	1	0	1
50	3966.21	99.83	1	0	1					50	3971.06	99.95	1	0	1
51	3972.35	99.98	1	0	1					51	3971.98	99.97	1	0	1
52	3965.73	99.82	1	0	1					52	3967.5	99.86	1	0	1
53	3941.42	99.2	1	0	1					53	3969.12	99.9	1	0	1
54	3927.52	98.85	1	0	1					54	3973	100	1	0	1
55	3961.12	99.7	1	0	1					55	3972.67	99.99	1	0	1
56	3927.55	98.86	1	0	1					56	3971.98	99.97	1	0	1
57	3917.41	98.6	1	0	1					57	3972.5	99.99	1	0	1
58	3914.08	98.52	1	0	1					58	3968.88	99.9	1	0	1
59	3855.66	97.05	1	0	1					59	3972.67	99.99	1	0	1
60	3949.23	99.4	1	0	1					60	3972.35	99.98	1	0	1
61	3965.78	99.82	1	0	1					61	3968.36	99.88	1	0	1
62	3972.03	99.98	1	0	1					62	3972.35	99.98	1	0	1
63	3956.84	99.59	1	0	1					63	3964.59	99.79	1	0	1
64	3971.46	99.96	1	0	1					64	3971.46	99.96	1	0	1
65	3880.69	97.68	1	0	1					65	3971.98	99.97	1	0	1
66	3933.2	99	1	0	1					66	3967.5	99.86	1	0	1
67	3972.67	99.99	1	0	1					67	3971.46	99.96	1	0	1
68	3970.09	99.93	1	0	1					68	3969.47	99.91	1	0	1
69	3805.33	95.78	1	0	1					69	3973	100	1	0	1
70	3970.09	99.93	1	0	1					70	3973	100	1	0	1
71	3958.13	99.63	1	0	1					71	3971.46	99.96	1	0	1
72	3951.34	99.45	1	0	1					72	3969.12	99.9	1	0	1
73	3839.26	96.63	1	0	1					73	3973.01	100	1	0	1
74	3861.02	97.18	1	0	1					74	3971.98	99.97	1	0	1
75	3949.75	99.41	1	0	1					75	3972.5	99.99	1	0	1
76	3943.55	99.26	1	0	1					76	3972.5	99.99	1	0	1
77	3888.03	97.86	1	0	1					77	3971.98	99.97	1	0	1
78	3805.3	95.78	1	0	1					78	3973.01	100	1	0	1
79	3965.78	99.82	1	0	1					79	3972.5	99.99	1	0	1
80	3972.35	99.98	1	0	1					80	3970.73	99.94	1	0	1
81	3855.74	97.05	1	0	1					81	3972.35	99.98	1	0	1
82	3961.04	99.7	1	0	1					82	3971.98	99.97	1	0	1
83	3942.71	99.24	1	0	1					83	3971.98	99.97	1	0	1
84	3962.15	99.73	1	0	1					84	3973	100	1	0	1
85	3953.7	99.51	1	0	1					85	3972.03	99.98	1	0	1
86	3959.57	99.66	1	0	1					86	3972.35	99.98	1	0	1
87	3937.77	99.11	1	0	1					87	3972.35	99.98	1	0	1
88	3809.84	95.89	1	0	1					88	3973.01	100	1	0	1
89	3792.08	95.45	1	0	1					89	3972.35	99.98	1	0	1
90	3823.45	96.24	1	0	1					90	3972.35	99.98	1	0	1
91	3972.17	99.98	1	0	1					91	3973.01	100	1	0	1
92	3743.47	94.22	1	0	1					92	3973.01	100	1	0	1
93	3816.37	96.06	1	0	1					93	3972.35	99.98	1	0	1
94	3908.91	98.39	1	0	1					94	3972.35	99.98	1	0	1
95	3938.74	99.14	1	0	1					95	3973	100	1	0	1
96	3915.8	98.56	1	0	1					96	3972.03	99.98	1	0	1
97	3914.53	98.53	1	0	1					97	3971.98	99.97	1	0	1
98	3960.83	99.69	1	0	1					98	3972.67	99.99	1	0	1
99	3882.86	97.73	1	0	1					99	3973	100	1	0	1
100	3972.35	99.98	1	0	1					100	3966.53	99.84	1	0	1
101	3880.99	97.68	1	0	1					101	3971.46	99.96	1	0	1
102	3964.92	99.8	1	0	1					102	3972.5	99.99	1	0	1
103	3755.07	94.51	1	0	1					103	3972.35	99.98	1	0	1
104	3961.12	99.7	1	0	1					104	3968.88	99.9	1	0	1
105	3964.59	99.79	1	0	1					105	3972.67	99.99	1	0	1
106	3939.93	99.17	1	0	1					106	3971.98	99.97	1	0	1
107	3927.52	98.85	1	0	1					107	3968.8	99.89	1	0	1
108	3917.35	98.6	1	0	1					108	3970.73	99.94	1	0	1
109	3972.03	99.98	1	0	1					109	3973	100	1	0	1
110	3969.14	99.9	1	0	1					110	3972.35	99.98	1	0	1
111	3956.84	99.59	1	0	1					111	3973	100	1	0	1
112	3888.42	97.87	1	0	1					112	3972.5	99.99	1	0	1
113	3835.77	96.55	1	0	1					113	3973	100	1	0	1
114	3776.03	95.04	1	0	1					114	3972.5	99.99	1	0	1
115	3918.12	98.62	1	0	1					115	3969.44	99.91	1	0	1
116	3972.35	99.98	1	0	1					116	3972.35	99.98	1	0	1
117	3949.75	99.41	1	0	1					117	3972.35	99.98	1	0	1
118	3894.47	98.02	1	0	1					118	3973	100	1	0	1
119	3918.02	98.62	1	0	1					119	3973.01	100	1	0	1
120	3927.46	98.85	1	0	1					120	3969.44	99.91	1	0	1
121	3972.35	99.98	1	0	1					121	3972.35	99.98	1	0	1
122	3853.43	96.99	1	0	1					122	3972.5	99.99	1	0	1
123	3970.41	99.93	1	0	1					123	3968.36	99.88	1	0	1
124	3973	100	1	0	1					124	3972.5	99.99	1	0	1
125	3900.25	98.17	1	0	1					125	3967.18	99.85	1	0	1
126	3911.92	98.46	1	0	1					126	3971.46	99.96	1	0	1
127	3813.26	95.98	1	0	1					127	3970.09	99.93	1	0	1
128	3861.18	97.19	1	0	1					128	3968.36	99.88	1	0	1
129	3940.31	99.18	1	0	1					129	3972.35	99.98	1	0	1
130	3890.81	97.93	1	0	1					130	3971.98	99.97	1	0	1
131	3911.39	98.45	1	0	1					131	3972.35	99.98	1	0	1
132	3866.39	97.32	1	0	1					132	3973	100	1	0	1
133	3950.19	99.43	1	0	1					133	3972.67	99.99	1	0	1
134	3955.25	99.55	1	0	1					134	3972.67	99.99	1	0	1
135	3971.98	99.97	1	0	1					135	3973.01	100	1	0	1
136	3971.46	99.96	1	0	1					136	3972.67	99.99	1	0	1
137	3962.98	99.75	1	0	1					137	3972.67	99.99	1	0	1
138	3944.88	99.29	1	0	1					138	3972.67	99.99	1	0	1
139	3972.5	99.99	1	0	1					139	3972.35	99.98	1	0	1
140	3967.84	99.87	1	0	1					140	3971.06	99.95	1	0	1
141	3945.32	99.3	1	0	1					141	3972.67	99.99	1	0	1
142	3929.69	98.91	1	0	1					142	3971.98	99.97	1	0	1
143	3964.59	99.79	1	0	1					143	3972.67	99.99	1	0	1
144	3946.65	99.34	1	0	1					144	3971.98	99.97	1	0	1
145	3939.39	99.15	1	0	1					145	3973.01	100	1	0	1
146	3951.11	99.45	1	0	1					146	3972.5	99.99	1	0	1
147	3865.22	97.29	1	0	1					147	3973	100	1	0	1
148	3972.35	99.98	1	0	1					148	3972.67	99.99	1	0	1
149	3870.65	97.42	1	0	1					149	3972.35	99.98	1	0	1
150	3844.86	96.77	1	0	1					150	3972.67	99.99	1	0	1
151	3965.7	99.82	1	0	1					151	3968.88	99.9	1	0	1
152	3953.7	99.51	1	0	1					152	3973.01	100	1	0	1
153	3800.86	95.67	1	0	1					153	3972.5	99.99	1	0	1
154	3962.67	99.74	1	0	1					154	3972.67	99.99	1	0	1
155	3959.89	99.67	1	0	1					155	3973	100	1	0	1
156	3971.85	99.97	1	0	1					156	3972.5	99.99	1	0	1
157	3937.34	99.1	1	0	1					157	3971.98	99.97	1	0	1
158	3958.27	99.63	1	0	1					158	3969.44	99.91	1	0	1
159	3872.48	97.47	1	0	1					159	3973	100	1	0	1
160	3941.28	99.2	1	0	1					160	3969.44	99.91	1	0	1
161	3934.24	99.02	1	0	1					161	3967.5	99.86	1	0	1
162	3933.72	99.01	1	0	1					162	3973.01	100	1	0	1
163	3780.3	95.15	1	0	1					163	3972.67	99.99	1	0	1
164	3923.55	98.76	1	0	1					164	3972.67	99.99	1	0	1
165	3965.78	99.82	1	0	1					165	3971.46	99.96	1	0	1
166	3921.31	98.7	1	0	1					166	3972.03	99.98	1	0	1
167	3952.33	99.48	1	0	1					167	3973.01	100	1	0	1
168	3871.17	97.44	1	0	1					168	3971.06	99.95	1	0	1
169	3884.77	97.78	1	0	1					169	3972.67	99.99	1	0	1
170	3949.23	99.4	1	0	1					170	3972.67	99.99	1	0	1
171	3969.58	99.91	1	0	1					171	3971.46	99.96	1	0	1
172	3894.43	98.02	1	0	1					172	3972.67	99.99	1	0	1
173	3953.28	99.5	1	0	1					173	3972.67	99.99	1	0	1
174	3932.37	98.98	1	0	1					174	3972.35	99.98	1	0	1
175	3888.48	97.87	1	0	1					175	3972.5	99.99	1	0	1
176	3895.87	98.06	1	0	1					176	3973	100	1	0	1
177	3965.89	99.82	1	0	1					177	3973	100	1	0	1
178	3872.12	97.46	1	0	1					178	3968.88	99.9	1	0	1
179	3762.08	94.69	1	0	1					179	3971.46	99.96	1	0	1
180	3967.32	99.86	1	0	1					180	3963.62	99.76	1	0	1
181	3932.05	98.97	1	0	1					181	3972.5	99.99	1	0	1
182	3964.74	99.79	1	0	1					182	3972.35	99.98	1	0	1
183	3941.99	99.22	1	0	1					183	3973	100	1	0	1
184	3877.04	97.58	1	0	1					184	3967.5	99.86	1	0	1
185	3808.61	95.86	1	0	1					185	3972.5	99.99	1	0	1
186	3961.64	99.71	1	0	1					186	3972.35	99.98	1	0	1
187	3927.52	98.85	1	0	1					187	3972.35	99.98	1	0	1
188	3971.46	99.96	1	0	1					188	3970.41	99.93	1	0	1
189	3833.94	96.5	1	0	1					189	3973	100	1	0	1
190	3926.63	98.83	1	0	1					190	3972.67	99.99	1	0	1
191	3820.5	96.16	1	0	1					191	3972.35	99.98	1	0	1
192	3968.36	99.88	1	0	1					192	3971.06	99.95	1	0	1
193	3949.75	99.41	1	0	1					193	3972.35	99.98	1	0	1
194	3941.91	99.22	1	0	1					194	3972.5	99.99	1	0	1
195	3838.08	96.6	1	0	1					195	3973	100	1	0	1
196	3910.44	98.43	1	0	1					196	3972.67	99.99	1	0	1
197	3928.03	98.87	1	0	1					197	3973	100	1	0	1
198	3972.5	99.99	1	0	1					198	3972.35	99.98	1	0	1
199	3880.83	97.68	1	0	1					199	3973.01	100	1	0	1
200	3882.01	97.71	1	0						200	3973.01	100	1	0	1

## Sheet: 08_HCFMMACO_Seeds(225)
Fast Converegnce Exp							Fast Converegnce Exp			Slow Converegnce Exp							Slow Converegnce Exp
#	CBLF	Quality	Taumax	Taumin	DeltaTauminmax		Global Optimal Solution =	3973.01		#	CBLF	Quality	Taumax	Taumin	DeltaTauminmax		Global Optimal Solution =	3973.01
1	3957.51	99.61	1	0	1		Minimum Optimal Solution =	3716.07		1	3973	100	1	0	1		Minimum Optimal Solution =	3962.98
2	3943.59	99.26	1	0	1		Mean of Optimal Solution =	3917.95		2	3972.35	99.98	1	0	1		Mean of Optimal Solution =	3971.75
3	3945.1	99.3	1	0	1		Median of Optimal Solution=	3917.95		3	3972.67	99.99	1	0	1		Median of Optimal Solution =	3971.75
4	3886.68	97.83	1	0	1		Solution Standrad Deviation =	52.7489		4	3972.35	99.98	1	0	1		Solution Standrad Deviation =	1.6855
5	3872.63	97.47	1	0	1		Average Price =	19.99		5	3973.01	100	1	0	1		Average Price =	100.47
6	3972.35	99.98	1	0	1		Relability =	10		6	3973.01	100	1	0	1		Relability =	91
7	3958.45	99.63	1	0	1		Normalized Price =	199.9		7	3972.67	99.99	1	0	1		Normalized Price =	110.407
8	3939.62	99.16	1	0	1		Average Solution Quality =	98.6141		8	3970.41	99.93	1	0	1		Average Solution Quality =	99.9682
9	3964.92	99.8	1	0	1		Average FDC =	-287.97		9	3972.5	99.99	1	0	1		Average FDC =	-137.608
10	3943.06	99.25	1	0	1		Correlation Coefficent =	-1		10	3969.44	99.91	1	0	1		Correlation Coefficent =	-1
11	3955.95	99.57	1	0	1		Solution Robustness =	74.2754		11	3972.5	99.99	1	0	1		Solution Robustness =	2356.38
12	3796.51	95.56	1	0	1		Performance Rate =	0.0050025		12	3972.35	99.98	1	0	1		Performance Rate =	0.0090574
13	3926.78	98.84	1	0	1		Average Elapsed Time =	0.94919		13	3971.46	99.96	1	0	1		Average Elapsed Time =	4.6268
14	3968.36	99.88	1	0	1					14	3969.12	99.9	1	0	1
15	3922.7	98.73	1	0	1					15	3972.03	99.98	1	0	1
16	3959.89	99.67	1	0	1					16	3972.35	99.98	1	0	1
17	3863.02	97.23	1	0	1					17	3970.73	99.94	1	0	1
18	3927	98.84	1	0	1					18	3973.01	100	1	0	1
19	3961.8	99.72	1	0	1					19	3968.8	99.89	1	0	1
20	3921.52	98.7	1	0	1					20	3972.03	99.98	1	0	1
21	3853.19	96.98	1	0	1					21	3972.67	99.99	1	0	1
22	3926.6	98.83	1	0	1					22	3972.67	99.99	1	0	1
23	3852.07	96.96	1	0	1					23	3967.5	99.86	1	0	1
24	3972.5	99.99	1	0	1					24	3973	100	1	0	1
25	3970.41	99.93	1	0	1					25	3971.98	99.97	1	0	1
26	3972.67	99.99	1	0	1					26	3973	100	1	0	1
27	3941.92	99.22	1	0	1					27	3972.03	99.98	1	0	1
28	3915.29	98.55	1	0	1					28	3972.35	99.98	1	0	1
29	3897.17	98.09	1	0	1					29	3973.01	100	1	0	1
30	3967.5	99.86	1	0	1					30	3973	100	1	0	1
31	3936.94	99.09	1	0	1					31	3972.67	99.99	1	0	1
32	3960.83	99.69	1	0	1					32	3972.5	99.99	1	0	1
33	3950.63	99.44	1	0	1					33	3966.86	99.85	1	0	1
34	3899.41	98.15	1	0	1					34	3973	100	1	0	1
35	3946.82	99.34	1	0	1					35	3973	100	1	0	1
36	3912.01	98.46	1	0	1					36	3962.98	99.75	1	0	1
37	3860.97	97.18	1	0	1					37	3967.18	99.85	1	0	1
38	3971.52	99.96	1	0	1					38	3971.98	99.97	1	0	1
39	3943.55	99.26	1	0	1					39	3973	100	1	0	1
40	3956.77	99.59	1	0	1					40	3972.5	99.99	1	0	1
41	3911.49	98.45	1	0	1					41	3972.67	99.99	1	0	1
42	3934.33	99.03	1	0	1					42	3971.98	99.97	1	0	1
43	3958.8	99.64	1	0	1					43	3972.35	99.98	1	0	1
44	3836.9	96.57	1	0	1					44	3972.67	99.99	1	0	1
45	3971.06	99.95	1	0	1					45	3972.67	99.99	1	0	1
46	3909.62	98.4	1	0	1					46	3968.8	99.89	1	0	1
47	3956.84	99.59	1	0	1					47	3973	100	1	0	1
48	3881.51	97.7	1	0	1					48	3971.46	99.96	1	0	1
49	3833.32	96.48	1	0	1					49	3972.5	99.99	1	0	1
50	3972.35	99.98	1	0	1					50	3973	100	1	0	1
51	3940.44	99.18	1	0	1					51	3972.67	99.99	1	0	1
52	3889.76	97.9	1	0	1					52	3971.98	99.97	1	0	1
53	3946.96	99.34	1	0	1					53	3973.01	100	1	0	1
54	3964.74	99.79	1	0	1					54	3972.35	99.98	1	0	1
55	3958.02	99.62	1	0	1					55	3971.98	99.97	1	0	1
56	3956.84	99.59	1	0	1					56	3973.01	100	1	0	1
57	3879.5	97.65	1	0	1					57	3972.5	99.99	1	0	1
58	3971.52	99.96	1	0	1					58	3968.47	99.89	1	0	1
59	3949.2	99.4	1	0	1					59	3973	100	1	0	1
60	3869.12	97.39	1	0	1					60	3968.88	99.9	1	0	1
61	3864.96	97.28	1	0	1					61	3973.01	100	1	0	1
62	3877.89	97.61	1	0	1					62	3972.35	99.98	1	0	1
63	3902.19	98.22	1	0	1					63	3972.67	99.99	1	0	1
64	3835.78	96.55	1	0	1					64	3972.03	99.98	1	0	1
65	3934.86	99.04	1	0	1					65	3971.98	99.97	1	0	1
66	3960.21	99.68	1	0	1					66	3968.8	99.89	1	0	1
67	3893.4	98	1	0	1					67	3972.67	99.99	1	0	1
68	3937.47	99.11	1	0	1					68	3972.35	99.98	1	0	1
69	3939.93	99.17	1	0	1					69	3972.5	99.99	1	0	1
70	3969.76	99.92	1	0	1					70	3970.41	99.93	1	0	1
71	3900.12	98.17	1	0	1					71	3973	100	1	0	1
72	3862.19	97.21	1	0	1					72	3971.06	99.95	1	0	1
73	3861.86	97.2	1	0	1					73	3973	100	1	0	1
74	3930.36	98.93	1	0	1					74	3970.41	99.93	1	0	1
75	3918.21	98.62	1	0	1					75	3970.09	99.93	1	0	1
76	3963.65	99.76	1	0	1					76	3973	100	1	0	1
77	3958.54	99.64	1	0	1					77	3971.06	99.95	1	0	1
78	3870.13	97.41	1	0	1					78	3972.67	99.99	1	0	1
79	3912.27	98.47	1	0	1					79	3972.67	99.99	1	0	1
80	3961.12	99.7	1	0	1					80	3972.35	99.98	1	0	1
81	3852.9	96.98	1	0	1					81	3972.03	99.98	1	0	1
82	3900.64	98.18	1	0	1					82	3972.67	99.99	1	0	1
83	3886.16	97.81	1	0	1					83	3968.88	99.9	1	0	1
84	3963.19	99.75	1	0	1					84	3972.35	99.98	1	0	1
85	3972.35	99.98	1	0	1					85	3971.06	99.95	1	0	1
86	3958.02	99.62	1	0	1					86	3972.35	99.98	1	0	1
87	3946.65	99.34	1	0	1					87	3973.01	100	1	0	1
88	3953.61	99.51	1	0	1					88	3971.98	99.97	1	0	1
89	3721.16	93.66	1	0	1					89	3972.35	99.98	1	0	1
90	3817.32	96.08	1	0	1					90	3972.35	99.98	1	0	1
91	3837.82	96.6	1	0	1					91	3969.12	99.9	1	0	1
92	3967.18	99.85	1	0	1					92	3968.88	99.9	1	0	1
93	3925.17	98.8	1	0	1					93	3971.06	99.95	1	0	1
94	3943.03	99.25	1	0	1					94	3972.67	99.99	1	0	1
95	3972.35	99.98	1	0	1					95	3971.98	99.97	1	0	1
96	3892.3	97.97	1	0	1					96	3972.35	99.98	1	0	1
97	3931.13	98.95	1	0	1					97	3972.35	99.98	1	0	1
98	3899.93	98.16	1	0	1					98	3964.59	99.79	1	0	1
99	3824.9	96.27	1	0	1					99	3968.88	99.9	1	0	1
100	3913.68	98.51	1	0	1					100	3972.5	99.99	1	0	1
101	3910.42	98.42	1	0	1					101	3973.01	100	1	0	1
102	3943.55	99.26	1	0	1					102	3970.09	99.93	1	0	1
103	3932.16	98.97	1	0	1					103	3970.73	99.94	1	0	1
104	3915.09	98.54	1	0	1					104	3972.5	99.99	1	0	1
105	3799.82	95.64	1	0	1					105	3971.98	99.97	1	0	1
106	3966.86	99.85	1	0	1					106	3971.46	99.96	1	0	1
107	3941	99.19	1	0	1					107	3973	100	1	0	1
108	3950.93	99.44	1	0	1					108	3971.38	99.96	1	0	1
109	3964.74	99.79	1	0	1					109	3971.06	99.95	1	0	1
110	3912.24	98.47	1	0	1					110	3973	100	1	0	1
111	3879.08	97.64	1	0	1					111	3972.35	99.98	1	0	1
112	3920.66	98.68	1	0	1					112	3969.39	99.91	1	0	1
113	3967.18	99.85	1	0	1					113	3972.67	99.99	1	0	1
114	3972.67	99.99	1	0	1					114	3972.67	99.99	1	0	1
115	3949.99	99.42	1	0	1					115	3971.98	99.97	1	0	1
116	3929.59	98.91	1	0	1					116	3966.53	99.84	1	0	1
117	3725.37	93.77	1	0	1					117	3973	100	1	0	1
118	3847.93	96.85	1	0	1					118	3973	100	1	0	1
119	3911.39	98.45	1	0	1					119	3973.01	100	1	0	1
120	3962.98	99.75	1	0	1					120	3971.46	99.96	1	0	1
121	3895.11	98.04	1	0	1					121	3972.67	99.99	1	0	1
122	3902.57	98.23	1	0	1					122	3972.67	99.99	1	0	1
123	3908.36	98.37	1	0	1					123	3972.35	99.98	1	0	1
124	3972.67	99.99	1	0	1					124	3970.41	99.93	1	0	1
125	3897.2	98.09	1	0	1					125	3972.5	99.99	1	0	1
126	3716.07	93.53	1	0	1					126	3972.5	99.99	1	0	1
127	3857.07	97.08	1	0	1					127	3973.01	100	1	0	1
128	3874.54	97.52	1	0	1					128	3973	100	1	0	1
129	3966.53	99.84	1	0	1					129	3973.01	100	1	0	1
130	3791.76	95.44	1	0	1					130	3972.35	99.98	1	0	1
131	3935.72	99.06	1	0	1					131	3971.46	99.96	1	0	1
132	3931.98	98.97	1	0	1					132	3973	100	1	0	1
133	3958.02	99.62	1	0	1					133	3971.98	99.97	1	0	1
134	3946.82	99.34	1	0	1					134	3972.35	99.98	1	0	1
135	3811.75	95.94	1	0	1					135	3970.41	99.93	1	0	1
136	3831.56	96.44	1	0	1					136	3973	100	1	0	1
137	3910.3	98.42	1	0	1					137	3970.41	99.93	1	0	1
138	3962.67	99.74	1	0	1					138	3972.5	99.99	1	0	1
139	3964.27	99.78	1	0	1					139	3972.03	99.98	1	0	1
140	3954.58	99.54	1	0	1					140	3973	100	1	0	1
141	3938.33	99.13	1	0	1					141	3970.41	99.93	1	0	1
142	3964.92	99.8	1	0	1					142	3972.03	99.98	1	0	1
143	3909.15	98.39	1	0	1					143	3973	100	1	0	1
144	3970.41	99.93	1	0	1					144	3973	100	1	0	1
145	3964.74	99.79	1	0	1					145	3973	100	1	0	1
146	3964.22	99.78	1	0	1					146	3973	100	1	0	1
147	3962.67	99.74	1	0	1					147	3971.46	99.96	1	0	1
148	3852.16	96.96	1	0	1					148	3972.5	99.99	1	0	1
149	3871.17	97.44	1	0	1					149	3968.88	99.9	1	0	1
150	3884.61	97.77	1	0	1					150	3973.01	100	1	0	1
151	3971.46	99.96	1	0	1					151	3972.5	99.99	1	0	1
152	3892.84	97.98	1	0	1					152	3972.5	99.99	1	0	1
153	3959.05	99.65	1	0	1					153	3972.03	99.98	1	0	1
154	3883.06	97.74	1	0	1					154	3972.03	99.98	1	0	1
155	3973	100	1	0	1					155	3972.67	99.99	1	0	1
156	3946.65	99.34	1	0	1					156	3972.35	99.98	1	0	1
157	3940.96	99.19	1	0	1					157	3969.12	99.9	1	0	1
158	3962.33	99.73	1	0	1					158	3972.67	99.99	1	0	1
159	3950.61	99.44	1	0	1					159	3973.01	100	1	0	1
160	3966.68	99.84	1	0	1					160	3972.03	99.98	1	0	1
161	3885.42	97.8	1	0	1					161	3972.67	99.99	1	0	1
162	3933.69	99.01	1	0	1					162	3972.67	99.99	1	0	1
163	3938.09	99.12	1	0	1					163	3973	100	1	0	1
164	3948.37	99.38	1	0	1					164	3965.26	99.8	1	0	1
165	3931.43	98.95	1	0	1					165	3972.67	99.99	1	0	1
166	3948.37	99.38	1	0	1					166	3973.01	100	1	0	1
167	3824.12	96.25	1	0	1					167	3970.09	99.93	1	0	1
168	3955.44	99.56	1	0	1					168	3971.98	99.97	1	0	1
169	3860.95	97.18	1	0	1					169	3972.35	99.98	1	0	1
170	3967.18	99.85	1	0	1					170	3970.73	99.94	1	0	1
171	3941.65	99.21	1	0	1					171	3968.36	99.88	1	0	1
172	3763.7	94.73	1	0	1					172	3973	100	1	0	1
173	3943.94	99.27	1	0	1					173	3973.01	100	1	0	1
174	3938.09	99.12	1	0	1					174	3972.67	99.99	1	0	1
175	3966.21	99.83	1	0	1					175	3970.73	99.94	1	0	1
176	3937.77	99.11	1	0	1					176	3970.09	99.93	1	0	1
177	3730.07	93.89	1	0	1					177	3973.01	100	1	0	1
178	3889.91	97.91	1	0	1					178	3972.67	99.99	1	0	1
179	3873.24	97.49	1	0	1					179	3972.67	99.99	1	0	1
180	3857.24	97.09	1	0	1					180	3968.88	99.9	1	0	1
181	3956.45	99.58	1	0	1					181	3972.5	99.99	1	0	1
182	3895.98	98.06	1	0	1					182	3973.01	100	1	0	1
183	3971.06	99.95	1	0	1					183	3973	100	1	0	1
184	3939.39	99.15	1	0	1					184	3972.67	99.99	1	0	1
185	3953.37	99.51	1	0	1					185	3971.98	99.97	1	0	1
186	3868.18	97.36	1	0	1					186	3972.67	99.99	1	0	1
187	3928.03	98.87	1	0	1					187	3969.39	99.91	1	0	1
188	3967.82	99.87	1	0	1					188	3970.09	99.93	1	0	1
189	3907.87	98.36	1	0	1					189	3972.35	99.98	1	0	1
190	3896.54	98.08	1	0	1					190	3973	100	1	0	1
191	3970.09	99.93	1	0	1					191	3970.09	99.93	1	0	1
192	3923.88	98.76	1	0	1					192	3972.35	99.98	1	0	1
193	3864	97.26	1	0	1					193	3972.67	99.99	1	0	1
194	3972.35	99.98	1	0	1					194	3972.67	99.99	1	0	1
195	3885.42	97.8	1	0	1					195	3969.44	99.91	1	0	1
196	3973.01	100	1	0	1					196	3972.35	99.98	1	0	1
197	3884.36	97.77	1	0	1					197	3969.12	99.9	1	0	1
198	3955.55	99.56	1	0	1					198	3973.01	100	1	0	1
199	3915.86	98.56	1	0	1					199	3971.98	99.97	1	0	1
200	3880.47	97.67	1	0	1					200	3972.03	99.98	1	0	1

## Sheet: 09_HCFMMACO_Seeds(11)
Fast Converegnce Exp							Fast Converegnce Exp			Slow Converegnce Exp							Slow Converegnce Exp
#	CBLF	Quality	Taumax	Taumin	DeltaTauminmax		Global Optimal Solution =	3973.01		#	CBLF	Quality	Taumax	Taumin	DeltaTauminmax		Global Optimal Solution =	3973.01
1	3949.75	99.41	1	0	1		Minimum Optimal Solution =	3560.03		1	3967.5	99.86	1	0	1		Minimum Optimal Solution =	3962.16
2	3952.85	99.49	1	0	1		Mean of Optimal Solution =	3915.66		2	3971.46	99.96	1	0	1		Mean of Optimal Solution =	3971.69
3	3868.31	97.36	1	0	1		Median of Optimal Solution =	3915.66		3	3972.67	99.99	1	0	1		Median of Optimal Solution =	3971.69
4	3917.85	98.61	1	0	1		Solution Standrad Deviation =	65.1487		4	3973	100	1	0	1		Solution Standrad Deviation =	1.917
5	3939.93	99.17	1	0	1		Average Price =	21.055		5	3971.98	99.97	1	0	1		Average Price =	101.32
6	3933.72	99.01	1	0	1		Relability =	17.5		6	3972.35	99.98	1	0	1		Relability =	91.5
7	3952.73	99.49	1	0	1		Normalized Price =	120.314		7	3972.03	99.98	1	0	1		Normalized Price =	110.732
8	3942.51	99.23	1	0	1		Average Solution Quality =	98.5565		8	3972.35	99.98	1	0	1		Average Solution Quality =	99.9668
9	3964.92	99.8	1	0	1		Average FDC =	-269.699		9	3972.5	99.99	1	0	1		Average FDC =	-136.68
10	3819.1	96.13	1	0	1		Correlation Coefficent =	-1		10	3970.73	99.94	1	0	1		Correlation Coefficent =	-0.73472
11	3883.03	97.74	1	0	1		Solution Robustness =	60.1034		11	3971.98	99.97	1	0	1		Solution Robustness =	2071.77
12	3881.54	97.7	1	0	1		Performance Rate =	0.0083116		12	3969.39	99.91	1	0	1		Performance Rate =	0.0090308
13	3944.82	99.29	1	0	1		Average Elapsed Time =	0.99968		13	3972.35	99.98	1	0	1		Average Elapsed Time =	4.8359
14	3907.51	98.35	1	0	1					14	3972.67	99.99	1	0	1
15	3874.15	97.51	1	0	1					15	3972.67	99.99	1	0	1
16	3968.88	99.9	1	0	1					16	3972.67	99.99	1	0	1
17	3963.42	99.76	1	0	1					17	3972.67	99.99	1	0	1
18	3961.68	99.71	1	0	1					18	3972.35	99.98	1	0	1
19	3912.63	98.48	1	0	1					19	3971.98	99.97	1	0	1
20	3972.35	99.98	1	0	1					20	3970.73	99.94	1	0	1
21	3903.53	98.25	1	0	1					21	3971.98	99.97	1	0	1
22	3915.63	98.56	1	0	1					22	3970.73	99.94	1	0	1
23	3970.41	99.93	1	0	1					23	3970.41	99.93	1	0	1
24	3843.24	96.73	1	0	1					24	3967.84	99.87	1	0	1
25	3972.35	99.98	1	0	1					25	3972.35	99.98	1	0	1
26	3971.06	99.95	1	0	1					26	3972.67	99.99	1	0	1
27	3770.36	94.9	1	0	1					27	3972.03	99.98	1	0	1
28	3940.44	99.18	1	0	1					28	3973.01	100	1	0	1
29	3898.49	98.12	1	0	1					29	3970.41	99.93	1	0	1
30	3971.7	99.97	1	0	1					30	3972.35	99.98	1	0	1
31	3925.76	98.81	1	0	1					31	3969.39	99.91	1	0	1
32	3768.01	94.84	1	0	1					32	3972.35	99.98	1	0	1
33	3947.49	99.36	1	0	1					33	3971.06	99.95	1	0	1
34	3896.7	98.08	1	0	1					34	3973.01	100	1	0	1
35	3915.59	98.55	1	0	1					35	3971.06	99.95	1	0	1
36	3784.11	95.25	1	0	1					36	3972.35	99.98	1	0	1
37	3942.74	99.24	1	0	1					37	3973	100	1	0	1
38	3958.54	99.64	1	0	1					38	3972.03	99.98	1	0	1
39	3948.72	99.39	1	0	1					39	3971.06	99.95	1	0	1
40	3913.3	98.5	1	0	1					40	3970.73	99.94	1	0	1
41	3927.52	98.85	1	0	1					41	3972.67	99.99	1	0	1
42	3904.11	98.27	1	0	1					42	3972.03	99.98	1	0	1
43	3971.46	99.96	1	0	1					43	3973	100	1	0	1
44	3972.5	99.99	1	0	1					44	3968.88	99.9	1	0	1
45	3960.51	99.69	1	0	1					45	3972.67	99.99	1	0	1
46	3827.34	96.33	1	0	1					46	3972.67	99.99	1	0	1
47	3958.54	99.64	1	0	1					47	3973.01	100	1	0	1
48	3971.46	99.96	1	0	1					48	3972.67	99.99	1	0	1
49	3937.34	99.1	1	0	1					49	3962.67	99.74	1	0	1
50	3970.09	99.93	1	0	1					50	3968.88	99.9	1	0	1
51	3560.03	89.61	1	0	1					51	3972.67	99.99	1	0	1
52	3971.46	99.96	1	0	1					52	3972.67	99.99	1	0	1
53	3958.78	99.64	1	0	1					53	3972.35	99.98	1	0	1
54	3909.47	98.4	1	0	1					54	3972.67	99.99	1	0	1
55	3833.94	96.5	1	0	1					55	3972.67	99.99	1	0	1
56	3848.09	96.86	1	0	1					56	3972.35	99.98	1	0	1
57	3899.01	98.14	1	0	1					57	3973.01	100	1	0	1
58	3915.15	98.54	1	0	1					58	3972.35	99.98	1	0	1
59	3873.49	97.5	1	0	1					59	3972.35	99.98	1	0	1
60	3808.91	95.87	1	0	1					60	3972.5	99.99	1	0	1
61	3969.76	99.92	1	0	1					61	3972.35	99.98	1	0	1
62	3946.43	99.33	1	0	1					62	3972.67	99.99	1	0	1
63	3950.7	99.44	1	0	1					63	3970.41	99.93	1	0	1
64	3965.26	99.8	1	0	1					64	3966.86	99.85	1	0	1
65	3937.86	99.12	1	0	1					65	3972.67	99.99	1	0	1
66	3941.77	99.21	1	0	1					66	3972.5	99.99	1	0	1
67	3862.73	97.22	1	0	1					67	3969.12	99.9	1	0	1
68	3911.04	98.44	1	0	1					68	3971.46	99.96	1	0	1
69	3964.22	99.78	1	0	1					69	3963.19	99.75	1	0	1
70	3867.93	97.36	1	0	1					70	3972.35	99.98	1	0	1
71	3970.73	99.94	1	0	1					71	3970.41	99.93	1	0	1
72	3943.73	99.26	1	0	1					72	3970.73	99.94	1	0	1
73	3949.55	99.41	1	0	1					73	3972.35	99.98	1	0	1
74	3973.01	100	1	0	1					74	3973.01	100	1	0	1
75	3971.98	99.97	1	0	1					75	3972.5	99.99	1	0	1
76	3899.96	98.16	1	0	1					76	3972.67	99.99	1	0	1
77	3964.62	99.79	1	0	1					77	3973.01	100	1	0	1
78	3933.2	99	1	0	1					78	3973	100	1	0	1
79	3908.48	98.38	1	0	1					79	3971.98	99.97	1	0	1
80	3953.37	99.51	1	0	1					80	3971.06	99.95	1	0	1
81	3930.66	98.93	1	0	1					81	3972.5	99.99	1	0	1
82	3943.55	99.26	1	0	1					82	3966.21	99.83	1	0	1
83	3971.46	99.96	1	0	1					83	3972.5	99.99	1	0	1
84	3696.11	93.03	1	0	1					84	3972.35	99.98	1	0	1
85	3970.09	99.93	1	0	1					85	3970.41	99.93	1	0	1
86	3926.81	98.84	1	0	1					86	3972.67	99.99	1	0	1
87	3925.97	98.82	1	0	1					87	3973	100	1	0	1
88	3916.78	98.58	1	0	1					88	3972.67	99.99	1	0	1
89	3973.01	100	1	0	1					89	3969.12	99.9	1	0	1
90	3728.48	93.85	1	0	1					90	3972.5	99.99	1	0	1
91	3968.8	99.89	1	0	1					91	3973	100	1	0	1
92	3973.01	100	1	0	1					92	3968.8	99.89	1	0	1
93	3972.5	99.99	1	0	1					93	3971.46	99.96	1	0	1
94	3912.01	98.46	1	0	1					94	3972.67	99.99	1	0	1
95	3918.8	98.64	1	0	1					95	3971.06	99.95	1	0	1
96	3957.51	99.61	1	0	1					96	3972.67	99.99	1	0	1
97	3950.27	99.43	1	0	1					97	3971.98	99.97	1	0	1
98	3934.24	99.02	1	0	1					98	3972.35	99.98	1	0	1
99	3928.38	98.88	1	0	1					99	3972.35	99.98	1	0	1
100	3972.03	99.98	1	0	1					100	3972.35	99.98	1	0	1
101	3931.27	98.95	1	0	1					101	3972.67	99.99	1	0	1
102	3935.51	99.06	1	0	1					102	3969.12	99.9	1	0	1
103	3972.5	99.99	1	0	1					103	3971.98	99.97	1	0	1
104	3930.99	98.94	1	0	1					104	3972.67	99.99	1	0	1
105	3955.02	99.55	1	0	1					105	3970.73	99.94	1	0	1
106	3971.46	99.96	1	0	1					106	3971.98	99.97	1	0	1
107	3937.12	99.1	1	0	1					107	3969.44	99.91	1	0	1
108	3958.02	99.62	1	0	1					108	3973.01	100	1	0	1
109	3943.61	99.26	1	0	1					109	3972.5	99.99	1	0	1
110	3972.35	99.98	1	0	1					110	3972.35	99.98	1	0	1
111	3908	98.36	1	0	1					111	3973.01	100	1	0	1
112	3883.06	97.74	1	0	1					112	3970.73	99.94	1	0	1
113	3848.13	96.86	1	0	1					113	3972.35	99.98	1	0	1
114	3892.94	97.98	1	0	1					114	3973	100	1	0	1
115	3787.41	95.33	1	0	1					115	3970.09	99.93	1	0	1
116	3842.22	96.71	1	0	1					116	3972.35	99.98	1	0	1
117	3877.37	97.59	1	0	1					117	3970.41	99.93	1	0	1
118	3959.05	99.65	1	0	1					118	3973	100	1	0	1
119	3970.09	99.93	1	0	1					119	3973	100	1	0	1
120	3955.02	99.55	1	0	1					120	3971.98	99.97	1	0	1
121	3747.09	94.31	1	0	1					121	3971.46	99.96	1	0	1
122	3934.01	99.02	1	0	1					122	3969.12	99.9	1	0	1
123	3970.73	99.94	1	0	1					123	3972.67	99.99	1	0	1
124	3960.61	99.69	1	0	1					124	3973	100	1	0	1
125	3740.89	94.16	1	0	1					125	3972.03	99.98	1	0	1
126	3886.96	97.83	1	0	1					126	3972.67	99.99	1	0	1
127	3968.29	99.88	1	0	1					127	3972.03	99.98	1	0	1
128	3968.47	99.89	1	0	1					128	3972.67	99.99	1	0	1
129	3937.34	99.1	1	0	1					129	3972.67	99.99	1	0	1
130	3969.12	99.9	1	0	1					130	3973	100	1	0	1
131	3890.47	97.92	1	0	1					131	3973.01	100	1	0	1
132	3881.66	97.7	1	0	1					132	3972.35	99.98	1	0	1
133	3972.35	99.98	1	0	1					133	3972.5	99.99	1	0	1
134	3971.46	99.96	1	0	1					134	3972.67	99.99	1	0	1
135	3925.49	98.8	1	0	1					135	3972.35	99.98	1	0	1
136	3950.72	99.44	1	0	1					136	3973.01	100	1	0	1
137	3934.24	99.02	1	0	1					137	3972.67	99.99	1	0	1
138	3847.38	96.84	1	0	1					138	3972.67	99.99	1	0	1
139	3946.29	99.33	1	0	1					139	3972.35	99.98	1	0	1
140	3842.79	96.72	1	0	1					140	3973.01	100	1	0	1
141	3918.21	98.62	1	0	1					141	3973	100	1	0	1
142	3959.05	99.65	1	0	1					142	3971.98	99.97	1	0	1
143	3856.44	97.07	1	0	1					143	3972.67	99.99	1	0	1
144	3844.28	96.76	1	0	1					144	3973	100	1	0	1
145	3774.94	95.01	1	0	1					145	3973	100	1	0	1
146	3956.33	99.58	1	0	1					146	3973	100	1	0	1
147	3863.42	97.24	1	0	1					147	3973.01	100	1	0	1
148	3951.76	99.47	1	0	1					148	3972.67	99.99	1	0	1
149	3877.3	97.59	1	0	1					149	3968.88	99.9	1	0	1
150	3958.54	99.64	1	0	1					150	3971.98	99.97	1	0	1
151	3970.41	99.93	1	0	1					151	3972.67	99.99	1	0	1
152	3972.35	99.98	1	0	1					152	3973	100	1	0	1
153	3931.13	98.95	1	0	1					153	3972.5	99.99	1	0	1
154	3916.33	98.57	1	0	1					154	3964.92	99.8	1	0	1
155	3958.54	99.64	1	0	1					155	3973	100	1	0	1
156	3945.32	99.3	1	0	1					156	3972.67	99.99	1	0	1
157	3904.49	98.28	1	0	1					157	3973	100	1	0	1
158	3836.42	96.56	1	0	1					158	3972.67	99.99	1	0	1
159	3789.9	95.39	1	0	1					159	3972.67	99.99	1	0	1
160	3744.5	94.25	1	0	1					160	3973	100	1	0	1
161	3939.98	99.17	1	0	1					161	3972.67	99.99	1	0	1
162	3971.98	99.97	1	0	1					162	3972.67	99.99	1	0	1
163	3968.36	99.88	1	0	1					163	3973.01	100	1	0	1
164	3952.96	99.5	1	0	1					164	3968.36	99.88	1	0	1
165	3939.01	99.14	1	0	1					165	3964.22	99.78	1	0	1
166	3881.47	97.7	1	0	1					166	3971.46	99.96	1	0	1
167	3958.02	99.62	1	0	1					167	3971.98	99.97	1	0	1
168	3899.87	98.16	1	0	1					168	3973.01	100	1	0	1
169	3962.67	99.74	1	0	1					169	3972.67	99.99	1	0	1
170	3918.21	98.62	1	0	1					170	3969.12	99.9	1	0	1
171	3880.99	97.68	1	0	1					171	3973.01	100	1	0	1
172	3971.46	99.96	1	0	1					172	3972.35	99.98	1	0	1
173	3869.05	97.38	1	0	1					173	3972.67	99.99	1	0	1
174	3952.96	99.5	1	0	1					174	3972.67	99.99	1	0	1
175	3961.12	99.7	1	0	1					175	3971.98	99.97	1	0	1
176	3735.51	94.02	1	0	1					176	3972.67	99.99	1	0	1
177	3910.74	98.43	1	0	1					177	3968.88	99.9	1	0	1
178	3895.27	98.04	1	0	1					178	3972.03	99.98	1	0	1
179	3921.77	98.71	1	0	1					179	3971.98	99.97	1	0	1
180	3954.58	99.54	1	0	1					180	3972.5	99.99	1	0	1
181	3972.67	99.99	1	0	1					181	3972.5	99.99	1	0	1
182	3952.13	99.47	1	0	1					182	3970.73	99.94	1	0	1
183	3952.99	99.5	1	0	1					183	3973	100	1	0	1
184	3787.41	95.33	1	0	1					184	3968.88	99.9	1	0	1
185	3966.88	99.85	1	0	1					185	3971.98	99.97	1	0	1
186	3842.78	96.72	1	0	1					186	3969.44	99.91	1	0	1
187	3738.03	94.09	1	0	1					187	3962.16	99.73	1	0	1
188	3939.8	99.16	1	0	1					188	3972.67	99.99	1	0	1
189	3970.09	99.93	1	0	1					189	3973	100	1	0	1
190	3799.3	95.63	1	0	1					190	3972.5	99.99	1	0	1
191	3972.67	99.99	1	0	1					191	3973.01	100	1	0	1
192	3867.32	97.34	1	0	1					192	3973	100	1	0	1
193	3861.79	97.2	1	0	1					193	3972.67	99.99	1	0	1
194	3960.88	99.69	1	0	1					194	3972.35	99.98	1	0	1
195	3925.97	98.82	1	0	1					195	3972.35	99.98	1	0	1
196	3968.8	99.89	1	0	1					196	3972.35	99.98	1	0	1
197	3861.12	97.18	1	0	1					197	3966.53	99.84	1	0	1
198	3926.14	98.82	1	0	1					198	3973.01	100	1	0	1
199	3968.8	99.89	1	0	1					199	3971.98	99.97	1	0	1
200	3937.34	99.1	1	0	1					200	3969.39	99.91	1	0	1

[truncated: 1 more sheets: 10_HCFMMACO_Seeds(25)]
