# Supplementary material for: Enhanced Hyper-Cube Framework Aco for Combinatorial Optimization Problems
Source: Preprints.org preprint supplement (doi:10.20944/preprints202108.0573.v1), 2021-08-31
Supplement: Supplementary file 18 [file 09_EHCFMMACO_@_Seeds(75)_Exp.xlsx]

## Sheet: 09_EHCFMMACO_@_Seeds(75)_Fast
Slow Convergence										Slow Convergenece
ige	Fbest(ige)	Fworst(ige)	Fmean(ige)	BWLocalDis	GlobalDis	Segma	MaxTau	MinTau		Expeirement no.(Iexp) =	2
1	3830.8	1988.08	2828.72	13	5	1	1	0		Seeds =	75
2	3830.8	2028.54	2759	10	5	1	1	0		Number of variables =	16
3	3883.16	1857.59	2770.42	14	7	1	1	0		no. of Ants =	25
4	3883.48	1838.83	2943.64	14	6	1	1	0		Maximum CBLF(fopt) =	3973.01
5	3908.69	2086.57	2796.47	11	4	1	1	0		Optimal Solution(xopt) =	323332333323333
6	3908.69	1915.28	2742.68	9	4	1	1	0		Number of Practical Optima =	1
7	3908.69	1468.26	2785.32	11	4	1	1	0		no. of Iterations(ige) =	45
8	3908.69	2007.52	2842.99	13	4	1	1	0		1st Global optima Found @ ige =	35
9	3930.01	1554.54	2655.32	13	2	1	1	0		Minimum Best Solution =	3830.8
10	3930.01	1996.83	2786.61	16	2	1	1	0		Mean of Best Solution =	3949.93
11	3930.01	1831.17	2795.34	10	2	1	1	0		SD of Best Solution =	36.393
12	3930.01	2151.66	2735.03	12	2	1	1	0		Fitness Distance Correlation =	-50.0334
13	3959.42	1517.05	2720.59	13	3	1	1	0		Correlation Coefficent =	-0.76854
14	3959.42	2004.31	2743.17	12	3	1	1	0		Elapsed Time =	2.1357
15	3959.42	1724.86	2773.71	14	3	1	1	0
16	3961.36	1953.57	2759.65	15	3	1	1	0
17	3961.36	2023.38	2716.1	9	3	1	1	0
18	3961.36	1689.23	2723.89	15	3	1	1	0
19	3961.36	2145.07	2816.99	13	3	1	1	0
20	3961.36	1997.19	2776.05	12	3	1	1	0
21	3961.36	2832.77	3293.24	10	3	1	1	0
22	3961.36	3352.74	3748.75	6	3	1	1	0
23	3961.36	2683.01	3344.41	9	3	1	1	0
24	3961.36	2282.75	3249.48	11	3	1	1	0
25	3973	2108.46	2993.29	9	1	1	1	0
26	3973	2330.84	3407.46	11	1	1	1	0
27	3973	2305.36	3201.71	8	1	1	1	0
28	3973	2743.83	3253.19	9	1	1	1	0
29	3973	2477.08	3512.98	10	1	1	1	0
30	3973	2210.45	3334.53	9	1	1	1	0
31	3973	2569.71	3361.19	7	1	1	1	0
32	3973	3031.64	3514	6	1	1	1	0
33	3973	3434.93	3813.64	5	1	1	1	0
34	3973	2279.18	3419.39	6	1	1	1	0
35	3973.01	3513.78	3834.62	6	0	1	1	0
36	3973.01	2869.39	3535.43	4	0	1	1	0
37	3973.01	2931.91	3598.95	6	0	1	1	0
38	3973.01	2827.91	3563.25	7	0	1	1	0
39	3973.01	3120.2	3606.26	7	0	1	1	0
40	3973.01	3129.42	3670.14	4	0	1	1	0
41	3973.01	3449.15	3809.24	3	0	2	1	0
42	3973.01	2867.45	3860.63	4	0	4	1	0
43	3973.01	3272.11	3792.19	4	0	4	1	0
44	3973.01	3219.47	3785.44	4	0	3	1	0
45	3973.01	3376.85	3887.99	1	0	8	1	0

## Sheet: 09_EHCFMMACO_@_Seeds(75)_Slow
Slow Convergence										Slow Convergenece
ige	Fbest(ige)	Fworst(ige)	Fmean(ige)	BWLocalDis	GlobalDis	Segma	MaxTau	MinTau		Expeirement no.(Iexp) =	6
1	3795.02	957.671	2801.89	12	5	1	1	0		Seeds =	75
2	3795.02	1534.34	2568.68	11	5	1	1	0		Number of variables =	16
3	3829.92	1409.87	2707.63	14	7	1	1	0		no. of Ants =	25
4	3829.92	1353.17	2545.64	11	7	1	1	0		Maximum CBLF(fopt) =	3973.01
5	3843.77	1975.71	2872.92	11	6	1	1	0		Optimal Solution(xopt) =	332233333333233
6	3930.01	1411.98	2802.75	13	2	1	1	0		Number of Practical Optima =	1
7	3930.01	1951.83	3059.84	9	2	1	1	0		no. of Iterations(ige) =	92
8	3930.01	1348.04	2757.25	10	2	1	1	0		1st Global optima Found @ ige =	36
9	3937.77	2084.32	2642.63	11	4	1	1	0		Minimum Best Solution =	3795.02
10	3937.77	1851.73	2697.88	14	4	1	1	0		Mean of Best Solution =	3960.82
11	3937.77	2095.83	2722.36	12	4	1	1	0		SD of Best Solution =	36.1909
12	3937.77	2744.85	3417.67	12	4	1	1	0		Fitness Distance Correlation =	-48.6621
13	3937.77	1721.89	2789.24	13	4	1	1	0		Correlation Coefficent =	-0.81449
14	3970.73	2004.24	2907.23	11	2	1	1	0		Elapsed Time =	4.2545
15	3970.73	1955.08	2674.65	13	2	1	1	0
16	3970.73	1595.06	2762.06	11	2	1	1	0
17	3970.73	1247.58	2638.77	14	2	1	1	0
18	3970.73	1615.21	2911.45	14	2	1	1	0
19	3970.73	2009.92	2644.07	11	2	1	1	0
20	3970.73	1792.52	2844.28	11	2	1	1	0
21	3970.73	1898.98	2755.81	12	2	1	1	0
22	3970.73	2212.4	3108.06	13	2	1	1	0
23	3970.73	3301.51	3627.87	6	2	1	1	0
24	3970.73	2186.16	3179.95	9	2	1	1	0
25	3970.73	2210.15	3014.73	12	2	1	1	0
26	3970.73	2383.49	3379.79	9	2	1	1	0
27	3970.73	2556.97	3202.84	7	2	1	1	0
28	3971.06	2443.92	3234.01	8	1	1	1	0
29	3971.06	3264.61	3610.37	7	1	1	1	0
30	3971.06	2378.42	3368.72	6	1	1	1	0
31	3971.06	2323.59	3254.8	7	1	1	1	0
32	3971.06	2391.45	3308.52	7	1	1	1	0
33	3971.06	2682.96	3404.81	8	1	1	1	0
34	3971.06	2819.65	3478.42	6	1	1	1	0
35	3973	3329.25	3801.28	8	1	2	1	0
36	3973.01	3438.8	3829.54	6	0	1	1	0
37	3973.01	3015.59	3684.45	5	0	2	1	0
38	3973.01	3313.51	3717.84	5	0	2	1	0
39	3973.01	3161.11	3700.86	5	0	2	1	0
40	3973.01	2952.96	3735.65	4	0	2	1	0
41	3973.01	3433	3773.23	4	0	4	1	0
42	3973.01	3435.16	3842.54	3	0	5	1	0
43	3973.01	3172.93	3829.28	2	0	10	1	0
44	3973.01	3674.71	3951.53	3	0	15	1	0
45	3973.01	3740.32	3943.68	1	0	15	1	0
46	3973.01	3699.49	3938.37	1	0	19	1	0
47	3973.01	3690.22	3951.86	1	0	18	1	0
48	3973.01	3690.22	3960.8	1	0	20	1	0
49	3973.01	3730.54	3927.91	1	0	18	1	0
50	3973.01	3730.54	3953.54	1	0	22	1	0
51	3973.01	3376.85	3929.61	1	0	21	1	0
52	3973.01	3730.54	3951.68	1	0	19	1	0
53	3973.01	3690.22	3958.91	1	0	23	1	0
54	3973.01	3376.85	3946.92	1	0	22	1	0
55	3973.01	3730.54	3949.44	1	0	21	1	0
56	3973.01	3918.7	3970.76	1	0	23	1	0
57	3973.01	3866.35	3968.51	1	0	22	1	0
58	3973.01	3699.49	3955.31	1	0	21	1	0
59	3973.01	3971.06	3972.93	1	0	24	1	0
60	3973.01	3793.8	3963.67	1	0	23	1	0
61	3973.01	3885.74	3969.42	1	0	22	1	0
62	3973.01	3971.06	3972.93	1	0	24	1	0
63	3973.01	3973	3973.01	1	0	24	1	0
64	3973.01	3973	3973.01	1	0	24	1	0
65	3973.01	3973.01	3973.01	0	0	25	1	0
66	3973.01	3971.06	3972.93	1	0	23	1	0
67	3973.01	3971.06	3972.93	1	0	24	1	0
68	3973.01	3971.06	3972.93	1	0	24	1	0
69	3973.01	3833.51	3967.43	1	0	24	1	0
70	3973.01	3973.01	3973.01	0	0	25	1	0
71	3973.01	3973.01	3973.01	0	0	25	1	0
72	3973.01	3973.01	3973.01	0	0	25	1	0
73	3973.01	3740.32	3963.71	1	0	24	1	0
74	3973.01	3973.01	3973.01	0	0	25	1	0
75	3973.01	3451.31	3952.14	1	0	24	1	0
76	3973.01	3973.01	3973.01	0	0	25	1	0
77	3973.01	3973.01	3973.01	0	0	25	1	0
78	3973.01	3973.01	3973.01	0	0	25	1	0
79	3973.01	3973.01	3973.01	0	0	25	1	0
80	3973.01	3973.01	3973.01	0	0	25	1	0
81	3973.01	3973.01	3973.01	0	0	25	1	0
82	3973.01	3973.01	3973.01	0	0	25	1	0
83	3973.01	3973.01	3973.01	0	0	25	1	0
84	3973.01	3973.01	3973.01	0	0	25	1	0
85	3973.01	3973.01	3973.01	0	0	25	1	0
86	3973.01	3833.51	3967.43	1	0	24	1	0
87	3973.01	3973.01	3973.01	0	0	25	1	0
88	3973.01	3953.89	3972.25	1	0	24	1	0
89	3973.01	3973.01	3973.01	0	0	25	1	0
90	3973.01	3973.01	3973.01	0	0	25	1	0
91	3973.01	3973.01	3973.01	0	0	25	1	0
92	3973.01	3973.01	3973.01	0	0	25	1	0
