# Supplementary material for: Enhanced Hyper-Cube Framework Aco for Combinatorial Optimization Problems
Source: Preprints.org preprint supplement (doi:10.20944/preprints202108.0573.v1), 2021-08-31
Supplement: Supplementary file 19 [file 09_EHCFMMACO_Seeds_Results.xlsx]

## Sheet: 00_Index
		Global optimal solution		Relaibility (%)		Normalized Price (iteration)		Correlation Coefficent		Performance rate		Elapsed time (Sec)		Solution Quality
		Fast convergence	Slow Convergence	Fast convergence	Slow Convergence	Fast convergence	Slow Convergence	Fast convergence	Slow Convergence	Fast convergence	Slow Convergence	Fast convergence	Slow Convergence	Fast convergence	Slow Convergence
	Seed (301)	3973.01	3973.01	55	97.5	51	95	-0.76569	-0.73736	0.020545	0.010522	1.3112	4.282	99.7675	99.9805
	Seed (2)	3973.01	3973.01	57.5	99	49	94.1263	-0.79162	-0.79162	0.020554	0.010624	1.355	4.3267	99.809	99.9808
	Seed (50)	3973.01	3973.01	58.5	99	45	93.5657	-0.7582	-0.74598	0.020863	0.010688	1.3558	4.3109	99.8327	99.98
	Seed (75)	3973.01	3973.01	59	98	43	93.9592	-1	-0.74662	0.02158	0.010643	1.322	4.3089	99.7844	99.9791
	Seed (111)	3973.01	3973.01	54	98	53	93.7245	-0.77788	-0.75117	0.019857	0.01067	1.307	4.2728	99.7657	99.9814
	Seed (200)	3973.01	3973.01	59	98	58	93.6888	-0.76335	-0.74294	0.020738	0.010674	1.3661	4.2854	99.8493	99.9817
	Seed (167)	3973.01	3973.01	28.61	99	56	95.1263	-0.78091	-0.74958	0.023853	0.010512	1.3784	4.5029	99.8484	99.9819
	Seed (225)	3973.01	3973.01	65.5	97.5	53	95.359	-0.775	-0.75291	0.018722	0.010487	1.3207	4.5038	99.8238	99.9791
	Seed (11)	3973.01	3973.01	51	98.5	54	93.1574	-0.77118	-0.74198	0.018722	0.010735	1.3186	4.3402	99.7627	99.9809
	Seed (25)	3973.01	3973.01	55.5	98	60	95.1582	-1	-0.7265	0.020153	0.010509	1.3221	4.7873	99.803	99.9801
			Fast Convergence						Slow Convergence
			Relaibility (%)	Normalized Price (iteration)	Correlation Coefficent	Performance Rate	Elapsed time (sec)		Relaibility (%)	Normalized Price (iteration)	Correlation Coefficent	Performance Rate	Elapsed time (sec)
		Min.	28.61	43	-1	0.018722	1.307	Min.	97.5	93.1574	-0.79162	0.010487	4.2728
		Max.	65.5	60	-0.7582	0.023853	1.3784	Max.	99	95.359	-0.7265	0.010735	4.7873
		Mean	54.361	52.2	-0.818383	0.0205587	1.33569	Mean	98.25	98.25	-0.748666	0.0106064	4.39209
		Median	56.5	53	-0.77644	0.0205495	1.32205	Median	98	94.0427	-0.7463	0.0106335	4.3188
		Standrad division	9.32925	5.11468	0.0912512	0.00139371	0.0241618	Standrad division	0.559017	0.756622	0.0160568	8.55794e-05	0.154649
			Solution Quality
			Fast Conv.	Slow Conv.
		Min.	99.7627	99.9791
		Max.	99.8493	99.9819
		Mean	99.8046	99.9806
		Median	99.806	99.9806
		Standrad division	0.031859	0.000936216

## Sheet: 01_EHCFMMACO_Seeds(301)
Fast Converegnce Exp							Fast Converegnce Exp			Slow Converegnce Exp							Slow Converegnce Exp
#	CBLF	Quality	Taumax	Taumin	DeltaTauminmax		Global Optimal Solution =	3973.01		#	CBLF	Quality	Taumax	Taumin	DeltaTauminmax		Global Optimal Solution =	3973.01
1	3967.18	99.85	1	0	1		Minimum Optimal Solution =	3862.63		1	3973	100	1	0	1		Minimum Optimal Solution =	3967.5
2	3966.56	99.84	1	0	1		Mean of Optimal Solution =	3963.77		2	3972.67	99.99	1	0	1		Mean of Optimal Solution =	3972.24
3	3962.68	99.74	1	0	1		Median of Optimal Solution =	3963.77		3	3973	100	1	0	1		Median of Optimal Solution =	3972.24
4	3970.73	99.94	1	0	1		Solution Standrad Deviation =	16.3406		4	3972.67	99.99	1	0	1		Solution Standrad Deviation =	1.0154
5	3962.66	99.74	1	0	1		Average Price =	26.77		5	3973	100	1	0	1		Average Price =	92.66
6	3971.06	99.95	1	0	1		Relability =	55		6	3972.67	99.99	1	0	1		Relability =	97.5
7	3972.67	99.99	1	0	1		Normalized Price =	48.6727		7	3972.67	99.99	1	0	1		Normalized Price =	95.0359
8	3961.16	99.7	1	0	1		Average Solution Quality =	99.7675		8	3973	100	1	0	1		Average Solution Quality =	99.9805
9	3973.01	100	1	0	1		Average FDC =	-198.12		9	3972.67	99.99	1	0	1		Average FDC =	-88.9326
10	3902.7	98.23	1	0	1		Correlation Coefficent =	-0.76569		10	3972.35	99.98	1	0	1		Correlation Coefficent =	-0.73736
11	3964.41	99.78	1	0	1		Solution Robustness =	242.571		11	3973	100	1	0	1		Solution Robustness =	3912.01
12	3971.06	99.95	1	0	1		Performance Rate =	0.020545		12	3973	100	1	0	1		Performance Rate =	0.010522
13	3970.09	99.93	1	0	1		Average Elapsed Time =	1.3112		13	3972.35	99.98	1	0	1		Average Elapsed Time =	4.282
14	3969.14	99.9	1	0	1					14	3972.35	99.98	1	0	1
15	3964.74	99.79	1	0	1					15	3972.5	99.99	1	0	1
16	3972.5	99.99	1	0	1					16	3973	100	1	0	1
17	3966.56	99.84	1	0	1					17	3972.35	99.98	1	0	1
18	3973	100	1	0	1					18	3971.46	99.96	1	0	1
19	3968.36	99.88	1	0	1					19	3971.06	99.95	1	0	1
20	3902.7	98.23	1	0	1					20	3971.46	99.96	1	0	1
21	3971.98	99.97	1	0	1					21	3971.46	99.96	1	0	1
22	3971.98	99.97	1	0	1					22	3972.67	99.99	1	0	1
23	3970.73	99.94	1	0	1					23	3972.5	99.99	1	0	1
24	3953.08	99.5	1	0	1					24	3973	100	1	0	1
25	3968.8	99.89	1	0	1					25	3972.35	99.98	1	0	1
26	3967.2	99.85	1	0	1					26	3972.35	99.98	1	0	1
27	3969.14	99.9	1	0	1					27	3972.35	99.98	1	0	1
28	3968.8	99.89	1	0	1					28	3972.67	99.99	1	0	1
29	3972.67	99.99	1	0	1					29	3971.98	99.97	1	0	1
30	3972.67	99.99	1	0	1					30	3973	100	1	0	1
31	3969.58	99.91	1	0	1					31	3973	100	1	0	1
32	3970.41	99.93	1	0	1					32	3972.67	99.99	1	0	1
33	3968.8	99.89	1	0	1					33	3972.5	99.99	1	0	1
34	3862.63	97.22	1	0	1					34	3971.46	99.96	1	0	1
35	3962.45	99.73	1	0	1					35	3968.88	99.9	1	0	1
36	3973.01	100	1	0	1					36	3972.35	99.98	1	0	1
37	3972.5	99.99	1	0	1					37	3972.35	99.98	1	0	1
38	3972.67	99.99	1	0	1					38	3971.98	99.97	1	0	1
39	3971.06	99.95	1	0	1					39	3967.5	99.86	1	0	1
40	3970.41	99.93	1	0	1					40	3972.03	99.98	1	0	1
41	3972.03	99.98	1	0	1					41	3972.67	99.99	1	0	1
42	3972.67	99.99	1	0	1					42	3972.35	99.98	1	0	1
43	3953.37	99.51	1	0	1					43	3973	100	1	0	1
44	3943.09	99.25	1	0	1					44	3973.01	100	1	0	1
45	3951.69	99.46	1	0	1					45	3973	100	1	0	1
46	3972.35	99.98	1	0	1					46	3970.73	99.94	1	0	1
47	3968.8	99.89	1	0	1					47	3973	100	1	0	1
48	3968.36	99.88	1	0	1					48	3972.5	99.99	1	0	1
49	3973.01	100	1	0	1					49	3972.03	99.98	1	0	1
50	3967.84	99.87	1	0	1					50	3972.5	99.99	1	0	1
51	3969.12	99.9	1	0	1					51	3972.35	99.98	1	0	1
52	3970.09	99.93	1	0	1					52	3972.35	99.98	1	0	1
53	3967.18	99.85	1	0	1					53	3971.98	99.97	1	0	1
54	3972.5	99.99	1	0	1					54	3973.01	100	1	0	1
55	3913.81	98.51	1	0	1					55	3970.41	99.93	1	0	1
56	3966.53	99.84	1	0	1					56	3971.46	99.96	1	0	1
57	3966.86	99.85	1	0	1					57	3972.67	99.99	1	0	1
58	3968.47	99.89	1	0	1					58	3972.35	99.98	1	0	1
59	3948.88	99.39	1	0	1					59	3972.67	99.99	1	0	1
60	3972.03	99.98	1	0	1					60	3967.5	99.86	1	0	1
61	3949.73	99.41	1	0	1					61	3972.67	99.99	1	0	1
62	3970.41	99.93	1	0	1					62	3972.35	99.98	1	0	1
63	3963.19	99.75	1	0	1					63	3971.98	99.97	1	0	1
64	3972.67	99.99	1	0	1					64	3971.98	99.97	1	0	1
65	3973.01	100	1	0	1					65	3973	100	1	0	1
66	3967.82	99.87	1	0	1					66	3972.5	99.99	1	0	1
67	3948.2	99.38	1	0	1					67	3973	100	1	0	1
68	3972.35	99.98	1	0	1					68	3972.67	99.99	1	0	1
69	3971.06	99.95	1	0	1					69	3973	100	1	0	1
70	3972.67	99.99	1	0	1					70	3972.35	99.98	1	0	1
71	3964.92	99.8	1	0	1					71	3971.98	99.97	1	0	1
72	3972.67	99.99	1	0	1					72	3972.67	99.99	1	0	1
73	3959.42	99.66	1	0	1					73	3972.35	99.98	1	0	1
74	3972.67	99.99	1	0	1					74	3972.67	99.99	1	0	1
75	3964.74	99.79	1	0	1					75	3973	100	1	0	1
76	3940.44	99.18	1	0	1					76	3971.46	99.96	1	0	1
77	3926.15	98.82	1	0	1					77	3973	100	1	0	1
78	3920.28	98.67	1	0	1					78	3972.67	99.99	1	0	1
79	3970.41	99.93	1	0	1					79	3972.67	99.99	1	0	1
80	3966.53	99.84	1	0	1					80	3972.35	99.98	1	0	1
81	3959.1	99.65	1	0	1					81	3972.35	99.98	1	0	1
82	3956.95	99.6	1	0	1					82	3973.01	100	1	0	1
83	3972.67	99.99	1	0	1					83	3972.35	99.98	1	0	1
84	3960.83	99.69	1	0	1					84	3973	100	1	0	1
85	3970.09	99.93	1	0	1					85	3972.67	99.99	1	0	1
86	3952.46	99.48	1	0	1					86	3972.35	99.98	1	0	1
87	3961.12	99.7	1	0	1					87	3967.5	99.86	1	0	1
88	3972.67	99.99	1	0	1					88	3972.67	99.99	1	0	1
89	3972.03	99.98	1	0	1					89	3972.67	99.99	1	0	1
90	3969.39	99.91	1	0	1					90	3972.67	99.99	1	0	1
91	3970.43	99.94	1	0	1					91	3971.06	99.95	1	0	1
92	3959.1	99.65	1	0	1					92	3973	100	1	0	1
93	3967.53	99.86	1	0	1					93	3972.67	99.99	1	0	1
94	3971.98	99.97	1	0	1					94	3972.67	99.99	1	0	1
95	3971.52	99.96	1	0	1					95	3972.03	99.98	1	0	1
96	3972.67	99.99	1	0	1					96	3972.67	99.99	1	0	1
97	3970.95	99.95	1	0	1					97	3971.98	99.97	1	0	1
98	3972.5	99.99	1	0	1					98	3972.35	99.98	1	0	1
99	3972.67	99.99	1	0	1					99	3973.01	100	1	0	1
100	3973	100	1	0	1					100	3970.41	99.93	1	0	1
101	3969.39	99.91	1	0	1					101	3972.35	99.98	1	0	1
102	3962.16	99.73	1	0	1					102	3972.67	99.99	1	0	1
103	3972.35	99.98	1	0	1					103	3973	100	1	0	1
104	3972.5	99.99	1	0	1					104	3973.01	100	1	0	1
105	3935.97	99.07	1	0	1					105	3973.01	100	1	0	1
106	3952.85	99.49	1	0	1					106	3972.67	99.99	1	0	1
107	3972.35	99.98	1	0	1					107	3972.35	99.98	1	0	1
108	3970.09	99.93	1	0	1					108	3972.35	99.98	1	0	1
109	3971.98	99.97	1	0	1					109	3972.67	99.99	1	0	1
110	3969.12	99.9	1	0	1					110	3972.35	99.98	1	0	1
111	3971.52	99.96	1	0	1					111	3972.67	99.99	1	0	1
112	3971.06	99.95	1	0	1					112	3972.35	99.98	1	0	1
113	3972.35	99.98	1	0	1					113	3973.01	100	1	0	1
114	3967.82	99.87	1	0	1					114	3972.35	99.98	1	0	1
115	3973.01	100	1	0	1					115	3971.98	99.97	1	0	1
116	3965.26	99.8	1	0	1					116	3972.35	99.98	1	0	1
117	3973	100	1	0	1					117	3972.35	99.98	1	0	1
118	3959.57	99.66	1	0	1					118	3969.12	99.9	1	0	1
119	3969.39	99.91	1	0	1					119	3972.35	99.98	1	0	1
120	3972.67	99.99	1	0	1					120	3972.67	99.99	1	0	1
121	3973.01	100	1	0	1					121	3970.41	99.93	1	0	1
122	3964.92	99.8	1	0	1					122	3971.98	99.97	1	0	1
123	3970.09	99.93	1	0	1					123	3972.67	99.99	1	0	1
124	3973.01	100	1	0	1					124	3972.67	99.99	1	0	1
125	3964.74	99.79	1	0	1					125	3972.35	99.98	1	0	1
126	3972.35	99.98	1	0	1					126	3967.5	99.86	1	0	1
127	3970.41	99.93	1	0	1					127	3970.73	99.94	1	0	1
128	3962.16	99.73	1	0	1					128	3973	100	1	0	1
129	3972.49	99.99	1	0	1					129	3972.67	99.99	1	0	1
130	3971.98	99.97	1	0	1					130	3973.01	100	1	0	1
131	3972.67	99.99	1	0	1					131	3969.39	99.91	1	0	1
132	3970.41	99.93	1	0	1					132	3972.67	99.99	1	0	1
133	3971.46	99.96	1	0	1					133	3971.98	99.97	1	0	1
134	3967.97	99.87	1	0	1					134	3973	100	1	0	1
135	3964.92	99.8	1	0	1					135	3972.03	99.98	1	0	1
136	3972.67	99.99	1	0	1					136	3970.41	99.93	1	0	1
137	3931.14	98.95	1	0	1					137	3973.01	100	1	0	1
138	3973	100	1	0	1					138	3973	100	1	0	1
139	3926.02	98.82	1	0	1					139	3972.67	99.99	1	0	1
140	3970.09	99.93	1	0	1					140	3973.01	100	1	0	1
141	3964.74	99.79	1	0	1					141	3970.41	99.93	1	0	1
142	3908.33	98.37	1	0	1					142	3973	100	1	0	1
143	3969.39	99.91	1	0	1					143	3970.73	99.94	1	0	1
144	3926.47	98.83	1	0	1					144	3971.46	99.96	1	0	1
145	3921.83	98.71	1	0	1					145	3972.67	99.99	1	0	1
146	3968.47	99.89	1	0	1					146	3973	100	1	0	1
147	3970.41	99.93	1	0	1					147	3973.01	100	1	0	1
148	3971.46	99.96	1	0	1					148	3973	100	1	0	1
149	3968.88	99.9	1	0	1					149	3971.98	99.97	1	0	1
150	3970.09	99.93	1	0	1					150	3973	100	1	0	1
151	3968.15	99.88	1	0	1					151	3973.01	100	1	0	1
152	3921.31	98.7	1	0	1					152	3972.03	99.98	1	0	1
153	3931.65	98.96	1	0	1					153	3973	100	1	0	1
154	3972.67	99.99	1	0	1					154	3969.12	99.9	1	0	1
155	3970.09	99.93	1	0	1					155	3972.67	99.99	1	0	1
156	3971.98	99.97	1	0	1					156	3972.67	99.99	1	0	1
157	3970.09	99.93	1	0	1					157	3972.67	99.99	1	0	1
158	3970.95	99.95	1	0	1					158	3971.98	99.97	1	0	1
159	3972.35	99.98	1	0	1					159	3973	100	1	0	1
160	3973.01	100	1	0	1					160	3970.73	99.94	1	0	1
161	3951.11	99.45	1	0	1					161	3972.67	99.99	1	0	1
162	3954.58	99.54	1	0	1					162	3971.98	99.97	1	0	1
163	3972.35	99.98	1	0	1					163	3971.46	99.96	1	0	1
164	3967.84	99.87	1	0	1					164	3970.95	99.95	1	0	1
165	3972.03	99.98	1	0	1					165	3972.35	99.98	1	0	1
166	3972.35	99.98	1	0	1					166	3972.67	99.99	1	0	1
167	3940.44	99.18	1	0	1					167	3972.03	99.98	1	0	1
168	3967.18	99.85	1	0	1					168	3971.46	99.96	1	0	1
169	3971.98	99.97	1	0	1					169	3972.35	99.98	1	0	1
170	3972.35	99.98	1	0	1					170	3972.35	99.98	1	0	1
171	3970.41	99.93	1	0	1					171	3972.35	99.98	1	0	1
172	3963.44	99.76	1	0	1					172	3973.01	100	1	0	1
173	3883.28	97.74	1	0	1					173	3971.98	99.97	1	0	1
174	3972.35	99.98	1	0	1					174	3971.98	99.97	1	0	1
175	3968.36	99.88	1	0	1					175	3972.67	99.99	1	0	1
176	3972.67	99.99	1	0	1					176	3972.35	99.98	1	0	1
177	3960.09	99.67	1	0	1					177	3972.5	99.99	1	0	1
178	3972.49	99.99	1	0	1					178	3971.98	99.97	1	0	1
179	3972.67	99.99	1	0	1					179	3972.67	99.99	1	0	1
180	3973.01	100	1	0	1					180	3973.01	100	1	0	1
181	3973	100	1	0	1					181	3972.03	99.98	1	0	1
182	3962.66	99.74	1	0	1					182	3972.35	99.98	1	0	1
183	3960.42	99.68	1	0	1					183	3972.03	99.98	1	0	1
184	3970.41	99.93	1	0	1					184	3973.01	100	1	0	1
185	3972.5	99.99	1	0	1					185	3972.35	99.98	1	0	1
186	3962.67	99.74	1	0	1					186	3973	100	1	0	1
187	3953.37	99.51	1	0	1					187	3972.67	99.99	1	0	1
188	3972.67	99.99	1	0	1					188	3972.35	99.98	1	0	1
189	3970.09	99.93	1	0	1					189	3972.5	99.99	1	0	1
190	3968.36	99.88	1	0	1					190	3972.35	99.98	1	0	1
191	3968.36	99.88	1	0	1					191	3972.35	99.98	1	0	1
192	3960.19	99.68	1	0	1					192	3972.03	99.98	1	0	1
193	3970.41	99.93	1	0	1					193	3973	100	1	0	1
194	3972.35	99.98	1	0	1					194	3971.06	99.95	1	0	1
195	3962.68	99.74	1	0	1					195	3973	100	1	0	1
196	3970.09	99.93	1	0	1					196	3972.67	99.99	1	0	1
197	3972.67	99.99	1	0	1					197	3972.35	99.98	1	0	1
198	3966.29	99.83	1	0	1					198	3972.67	99.99	1	0	1
199	3965.24	99.8	1	0	1					199	3972.35	99.98	1	0	1
200	3965.24	99.8	1	0	1					200	3973	100	1	0	1

## Sheet: 02_EHCFMMACO_Seeds(2)
Fast Converegnce Exp							Fast Converegnce Exp			Slow Converegnce Exp							Slow Converegnce Exp
#	CBLF	Quality	Taumax	Taumin	DeltaTauminmax		Global Optimal Solution =	3973.01		#	CBLF	Quality	Taumax	Taumin	DeltaTauminmax		Global Optimal Solution =	3973.01
1	3973.01	100	1	0	1		Minimum Optimal Solution =	3885.54		1	3973.01	100	1	0	1		Minimum Optimal Solution =	3967.18
2	3971.98	99.97	1	0	1		Mean of Optimal Solution =	3965.42		2	3973	100	1	0	1		Mean of Optimal Solution =	3972.25
3	3970.09	99.93	1	0	1		Median of Optimal Solution =	3965.42		3	3973.01	100	1	0	1		Median of Optimal Solution =	3972.25
4	3961.64	99.71	1	0	1		Solution Standrad Deviation =	14.2877		4	3972.35	99.98	1	0	1		Solution Standrad Deviation =	0.95812
5	3963.79	99.77	1	0	1		Average Price =	27.975		5	3971.46	99.96	1	0	1		Average Price =	93.185
6	3972.5	99.99	1	0	1		Relability =	57.5		6	3971.98	99.97	1	0	1		Relability =	99
7	3959.89	99.67	1	0	1		Normalized Price =	48.6522		7	3973.01	100	1	0	1		Normalized Price =	94.1263
8	3968.88	99.9	1	0	1		Average Solution Quality =	99.809		8	3971.46	99.96	1	0	1		Average Solution Quality =	99.9808
9	3973	100	1	0	1		Average FDC =	-223.56		9	3972.35	99.98	1	0	1		Average FDC =	-88.2921
10	3970.73	99.94	1	0	1		Correlation Coefficent =	-0.79162		10	3972.5	99.99	1	0	1		Correlation Coefficent =	-0.72807
11	3966.24	99.83	1	0	1		Solution Robustness =	277.542		11	3972.67	99.99	1	0	1		Solution Robustness =	4145.88
12	3936.82	99.09	1	0	1		Performance Rate =	0.020554		12	3972.35	99.98	1	0	1		Performance Rate =	0.010624
13	3972.35	99.98	1	0	1		Average Elapsed Time =	1.355		13	3972.67	99.99	1	0	1		Average Elapsed Time =	4.3267
14	3972.35	99.98	1	0	1					14	3971.46	99.96	1	0	1
15	3972.35	99.98	1	0	1					15	3972.5	99.99	1	0	1
16	3963.62	99.76	1	0	1					16	3972.35	99.98	1	0	1
17	3971.06	99.95	1	0	1					17	3973.01	100	1	0	1
18	3966.86	99.85	1	0	1					18	3972.35	99.98	1	0	1
19	3972.67	99.99	1	0	1					19	3973	100	1	0	1
20	3967.18	99.85	1	0	1					20	3972.5	99.99	1	0	1
21	3970.09	99.93	1	0	1					21	3972.35	99.98	1	0	1
22	3967.33	99.86	1	0	1					22	3973.01	100	1	0	1
23	3971.7	99.97	1	0	1					23	3972.35	99.98	1	0	1
24	3972.67	99.99	1	0	1					24	3973	100	1	0	1
25	3968.5	99.89	1	0	1					25	3973	100	1	0	1
26	3972.67	99.99	1	0	1					26	3971.98	99.97	1	0	1
27	3970.95	99.95	1	0	1					27	3972.35	99.98	1	0	1
28	3972.67	99.99	1	0	1					28	3969.39	99.91	1	0	1
29	3964.59	99.79	1	0	1					29	3972.35	99.98	1	0	1
30	3963.44	99.76	1	0	1					30	3972.35	99.98	1	0	1
31	3971.7	99.97	1	0	1					31	3972.35	99.98	1	0	1
32	3965.38	99.81	1	0	1					32	3972.35	99.98	1	0	1
33	3970.09	99.93	1	0	1					33	3972.35	99.98	1	0	1
34	3972.5	99.99	1	0	1					34	3972.03	99.98	1	0	1
35	3968.47	99.89	1	0	1					35	3972.67	99.99	1	0	1
36	3972.03	99.98	1	0	1					36	3972.03	99.98	1	0	1
37	3972.35	99.98	1	0	1					37	3972.35	99.98	1	0	1
38	3973	100	1	0	1					38	3971.06	99.95	1	0	1
39	3965.26	99.8	1	0	1					39	3973.01	100	1	0	1
40	3964.92	99.8	1	0	1					40	3972.5	99.99	1	0	1
41	3920.68	98.68	1	0	1					41	3967.18	99.85	1	0	1
42	3972.35	99.98	1	0	1					42	3972.5	99.99	1	0	1
43	3949.32	99.4	1	0	1					43	3971.46	99.96	1	0	1
44	3951.76	99.47	1	0	1					44	3972.35	99.98	1	0	1
45	3970.95	99.95	1	0	1					45	3971.98	99.97	1	0	1
46	3959.05	99.65	1	0	1					46	3972.35	99.98	1	0	1
47	3965.24	99.8	1	0	1					47	3973.01	100	1	0	1
48	3961.36	99.71	1	0	1					48	3972.5	99.99	1	0	1
49	3964.27	99.78	1	0	1					49	3972.67	99.99	1	0	1
50	3972.5	99.99	1	0	1					50	3973.01	100	1	0	1
51	3960.72	99.69	1	0	1					51	3972.67	99.99	1	0	1
52	3970.95	99.95	1	0	1					52	3973	100	1	0	1
53	3972.35	99.98	1	0	1					53	3973.01	100	1	0	1
54	3963.09	99.75	1	0	1					54	3973	100	1	0	1
55	3972.5	99.99	1	0	1					55	3970.73	99.94	1	0	1
56	3937.42	99.1	1	0	1					56	3973	100	1	0	1
57	3972.67	99.99	1	0	1					57	3973.01	100	1	0	1
58	3972.67	99.99	1	0	1					58	3971.98	99.97	1	0	1
59	3972.67	99.99	1	0	1					59	3972.35	99.98	1	0	1
60	3968.47	99.89	1	0	1					60	3973.01	100	1	0	1
61	3972.03	99.98	1	0	1					61	3972.35	99.98	1	0	1
62	3966.21	99.83	1	0	1					62	3971.98	99.97	1	0	1
63	3959.05	99.65	1	0	1					63	3971.06	99.95	1	0	1
64	3969.47	99.91	1	0	1					64	3972.35	99.98	1	0	1
65	3972.35	99.98	1	0	1					65	3973.01	100	1	0	1
66	3973.01	100	1	0	1					66	3970.09	99.93	1	0	1
67	3966.86	99.85	1	0	1					67	3971.06	99.95	1	0	1
68	3885.54	97.8	1	0	1					68	3972.5	99.99	1	0	1
69	3971.06	99.95	1	0	1					69	3973.01	100	1	0	1
70	3973.01	100	1	0	1					70	3973.01	100	1	0	1
71	3968.36	99.88	1	0	1					71	3973.01	100	1	0	1
72	3972.17	99.98	1	0	1					72	3967.5	99.86	1	0	1
73	3962.66	99.74	1	0	1					73	3969.44	99.91	1	0	1
74	3959.1	99.65	1	0	1					74	3973	100	1	0	1
75	3970.73	99.94	1	0	1					75	3973.01	100	1	0	1
76	3939.01	99.14	1	0	1					76	3971.46	99.96	1	0	1
77	3970.95	99.95	1	0	1					77	3972.67	99.99	1	0	1
78	3967.82	99.87	1	0	1					78	3972.67	99.99	1	0	1
79	3968.88	99.9	1	0	1					79	3971.06	99.95	1	0	1
80	3954.4	99.53	1	0	1					80	3973.01	100	1	0	1
81	3970.41	99.93	1	0	1					81	3970.73	99.94	1	0	1
82	3972.35	99.98	1	0	1					82	3973.01	100	1	0	1
83	3970.73	99.94	1	0	1					83	3972.67	99.99	1	0	1
84	3972.35	99.98	1	0	1					84	3972.5	99.99	1	0	1
85	3961.83	99.72	1	0	1					85	3972.35	99.98	1	0	1
86	3965.78	99.82	1	0	1					86	3972.5	99.99	1	0	1
87	3969.39	99.91	1	0	1					87	3973.01	100	1	0	1
88	3957.5	99.61	1	0	1					88	3972.67	99.99	1	0	1
89	3968.8	99.89	1	0	1					89	3972.67	99.99	1	0	1
90	3966.56	99.84	1	0	1					90	3972.67	99.99	1	0	1
91	3944.58	99.28	1	0	1					91	3970.41	99.93	1	0	1
92	3972.67	99.99	1	0	1					92	3973.01	100	1	0	1
93	3970.09	99.93	1	0	1					93	3969.12	99.9	1	0	1
94	3972.67	99.99	1	0	1					94	3972.35	99.98	1	0	1
95	3969.14	99.9	1	0	1					95	3972.67	99.99	1	0	1
96	3972.35	99.98	1	0	1					96	3972.5	99.99	1	0	1
97	3972.17	99.98	1	0	1					97	3971.46	99.96	1	0	1
98	3969.39	99.91	1	0	1					98	3972.67	99.99	1	0	1
99	3972.67	99.99	1	0	1					99	3971.46	99.96	1	0	1
100	3961.64	99.71	1	0	1					100	3972.67	99.99	1	0	1
101	3959.42	99.66	1	0	1					101	3969.39	99.91	1	0	1
102	3969.44	99.91	1	0	1					102	3972.35	99.98	1	0	1
103	3973.01	100	1	0	1					103	3972.5	99.99	1	0	1
104	3892.88	97.98	1	0	1					104	3972.5	99.99	1	0	1
105	3906.71	98.33	1	0	1					105	3971.06	99.95	1	0	1
106	3970.73	99.94	1	0	1					106	3972.5	99.99	1	0	1
107	3972.35	99.98	1	0	1					107	3972.35	99.98	1	0	1
108	3973	100	1	0	1					108	3972.35	99.98	1	0	1
109	3966.21	99.83	1	0	1					109	3972.67	99.99	1	0	1
110	3967.84	99.87	1	0	1					110	3971.06	99.95	1	0	1
111	3969.12	99.9	1	0	1					111	3971.46	99.96	1	0	1
112	3962.67	99.74	1	0	1					112	3972.35	99.98	1	0	1
113	3972.35	99.98	1	0	1					113	3973	100	1	0	1
114	3970.95	99.95	1	0	1					114	3972.5	99.99	1	0	1
115	3972.67	99.99	1	0	1					115	3971.98	99.97	1	0	1
116	3962.67	99.74	1	0	1					116	3972.35	99.98	1	0	1
117	3973	100	1	0	1					117	3972.67	99.99	1	0	1
118	3965.26	99.8	1	0	1					118	3972.5	99.99	1	0	1
119	3969.91	99.92	1	0	1					119	3971.98	99.97	1	0	1
120	3969.26	99.91	1	0	1					120	3970.41	99.93	1	0	1
121	3972.67	99.99	1	0	1					121	3972.5	99.99	1	0	1
122	3969.91	99.92	1	0	1					122	3973	100	1	0	1
123	3973	100	1	0	1					123	3969.39	99.91	1	0	1
124	3970.41	99.93	1	0	1					124	3972.35	99.98	1	0	1
125	3970.73	99.94	1	0	1					125	3973	100	1	0	1
126	3967.84	99.87	1	0	1					126	3973	100	1	0	1
127	3953.37	99.51	1	0	1					127	3972.5	99.99	1	0	1
128	3935.19	99.05	1	0	1					128	3971.98	99.97	1	0	1
129	3969.44	99.91	1	0	1					129	3972.5	99.99	1	0	1
130	3966.35	99.83	1	0	1					130	3973.01	100	1	0	1
131	3970.09	99.93	1	0	1					131	3972.35	99.98	1	0	1
132	3972.35	99.98	1	0	1					132	3972.5	99.99	1	0	1
133	3905.8	98.31	1	0	1					133	3972.35	99.98	1	0	1
134	3972.5	99.99	1	0	1					134	3972.67	99.99	1	0	1
135	3973	100	1	0	1					135	3972.67	99.99	1	0	1
136	3970.41	99.93	1	0	1					136	3971.98	99.97	1	0	1
137	3971.98	99.97	1	0	1					137	3973	100	1	0	1
138	3962.66	99.74	1	0	1					138	3973.01	100	1	0	1
139	3968.88	99.9	1	0	1					139	3972.67	99.99	1	0	1
140	3968.36	99.88	1	0	1					140	3972.67	99.99	1	0	1
141	3973	100	1	0	1					141	3970.09	99.93	1	0	1
142	3973.01	100	1	0	1					142	3969.12	99.9	1	0	1
143	3972.17	99.98	1	0	1					143	3972.67	99.99	1	0	1
144	3955.55	99.56	1	0	1					144	3973.01	100	1	0	1
145	3953.89	99.52	1	0	1					145	3972.35	99.98	1	0	1
146	3972.67	99.99	1	0	1					146	3971.46	99.96	1	0	1
147	3972.35	99.98	1	0	1					147	3972.35	99.98	1	0	1
148	3968.36	99.88	1	0	1					148	3973	100	1	0	1
149	3973.01	100	1	0	1					149	3972.5	99.99	1	0	1
150	3970.73	99.94	1	0	1					150	3972.67	99.99	1	0	1
151	3972.35	99.98	1	0	1					151	3973	100	1	0	1
152	3971.98	99.97	1	0	1					152	3971.46	99.96	1	0	1
153	3917.18	98.59	1	0	1					153	3971.98	99.97	1	0	1
154	3952.96	99.5	1	0	1					154	3970.73	99.94	1	0	1
155	3962.16	99.73	1	0	1					155	3972.67	99.99	1	0	1
156	3967.5	99.86	1	0	1					156	3972.67	99.99	1	0	1
157	3973.01	100	1	0	1					157	3971.98	99.97	1	0	1
158	3968.88	99.9	1	0	1					158	3973	100	1	0	1
159	3972.35	99.98	1	0	1					159	3972.03	99.98	1	0	1
160	3964.09	99.78	1	0	1					160	3973.01	100	1	0	1
161	3971.46	99.96	1	0	1					161	3972.03	99.98	1	0	1
162	3970.41	99.93	1	0	1					162	3972.67	99.99	1	0	1
163	3902.7	98.23	1	0	1					163	3972.5	99.99	1	0	1
164	3966.35	99.83	1	0	1					164	3972.67	99.99	1	0	1
165	3968.15	99.88	1	0	1					165	3971.06	99.95	1	0	1
166	3965.26	99.8	1	0	1					166	3973.01	100	1	0	1
167	3971.98	99.97	1	0	1					167	3972.35	99.98	1	0	1
168	3973.01	100	1	0	1					168	3972.5	99.99	1	0	1
169	3972.67	99.99	1	0	1					169	3973	100	1	0	1
170	3968.88	99.9	1	0	1					170	3972.35	99.98	1	0	1
171	3972.5	99.99	1	0	1					171	3972.67	99.99	1	0	1
172	3969.76	99.92	1	0	1					172	3973	100	1	0	1
173	3971.46	99.96	1	0	1					173	3973	100	1	0	1
174	3970.41	99.93	1	0	1					174	3973	100	1	0	1
175	3971.98	99.97	1	0	1					175	3973	100	1	0	1
176	3972.35	99.98	1	0	1					176	3973.01	100	1	0	1
177	3968.47	99.89	1	0	1					177	3973	100	1	0	1
178	3969.39	99.91	1	0	1					178	3971.98	99.97	1	0	1
179	3972.67	99.99	1	0	1					179	3972.35	99.98	1	0	1
180	3971.46	99.96	1	0	1					180	3972.67	99.99	1	0	1
181	3972.5	99.99	1	0	1					181	3971.98	99.97	1	0	1
182	3970.73	99.94	1	0	1					182	3973	100	1	0	1
183	3906.39	98.32	1	0	1					183	3972.35	99.98	1	0	1
184	3956.84	99.59	1	0	1					184	3972.67	99.99	1	0	1
185	3967.84	99.87	1	0	1					185	3972.67	99.99	1	0	1
186	3966.86	99.85	1	0	1					186	3973	100	1	0	1
187	3972.03	99.98	1	0	1					187	3973	100	1	0	1
188	3973.01	100	1	0	1					188	3972.35	99.98	1	0	1
189	3973.01	100	1	0	1					189	3971.98	99.97	1	0	1
190	3971.98	99.97	1	0	1					190	3972.35	99.98	1	0	1
191	3971.98	99.97	1	0	1					191	3972.67	99.99	1	0	1
192	3968.36	99.88	1	0	1					192	3972.67	99.99	1	0	1
193	3968.88	99.9	1	0	1					193	3972.35	99.98	1	0	1
194	3965.24	99.8	1	0	1					194	3973	100	1	0	1
195	3971.52	99.96	1	0	1					195	3971.46	99.96	1	0	1
196	3971.85	99.97	1	0	1					196	3972.67	99.99	1	0	1
197	3973	100	1	0	1					197	3970.41	99.93	1	0	1
198	3972.5	99.99	1	0	1					198	3972.67	99.99	1	0	1
199	3959.57	99.66	1	0	1					199	3971.98	99.97	1	0	1
200	3973.01	100	1	0	1					200	3973	100	1	0	1

## Sheet: 03_EHCFMMACO_Seeds(50)
Fast Converegnce Exp							Fast Converegnce Exp			Slow Converegnce Exp							Slow Converegnce Exp
#	CBLF	Quality	Taumax	Taumin	DeltaTauminmax		Global Optimal Solution =	3973.01		#	CBLF	Quality	Taumax	Taumin	DeltaTauminmax		Global Optimal Solution =	3973.01
1	3970.09	99.93	1	0	1		Minimum Optimal Solution=	3799.67		1	3972.67	99.99	1	0	1		Minimum Optimal Solution =	3967.5
2	3964.41	99.78	1	0	1		Mean of Optimal Solution =	3966.36		2	3973.01	100	1	0	1		Mean of Optimal Solution =	3972.22
3	3972.03	99.98	1	0	1		Median of Optimal Solution =	3966.36		3	3972.35	99.98	1	0	1		Median of Optimal Solution =	3972.22
4	3971.06	99.95	1	0	1		Solution Standrad Deviation =	15.3625		4	3971.98	99.97	1	0	1		Solution Standrad Deviation =	0.95298
5	3972.67	99.99	1	0	1		Average Price =	28.04		5	3973	100	1	0	1		Average Price =	92.63
6	3972.03	99.98	1	0	1		Relability =	58.5		6	3972.35	99.98	1	0	1		Relability =	99
7	3972.35	99.98	1	0	1		Normalized Price =	47.9316		7	3972.35	99.98	1	0	1		Normalized Price =	93.5657
8	3959.42	99.66	1	0	1		Average Solution Quality =	99.8327		8	3971.98	99.97	1	0	1		Average Solution Quality =	99.98
9	3971.98	99.97	1	0	1		Average FDC =	-202.201		9	3972.67	99.99	1	0	1		Average FDC =	-84.6998
10	3972.5	99.99	1	0	1		Correlation Coefficent =	-0.7582		10	3971.06	99.95	1	0	1		Correlation Coefficent =	-0.74598
11	3966.56	99.84	1	0	1		Solution Robustness =	258.185		11	3972.03	99.98	1	0	1		Solution Robustness =	4168.19
12	3967.33	99.86	1	0	1		Performance Rate =	0.020863		12	3968.88	99.9	1	0	1		Performance Rate =	0.010688
13	3947.16	99.35	1	0	1		Average Elapsed Time =	1.3558		13	3972.67	99.99	1	0	1		Average Elapsed Time =	4.3109
14	3972.67	99.99	1	0	1					14	3972.35	99.98	1	0	1
15	3970.09	99.93	1	0	1					15	3972.67	99.99	1	0	1
16	3972.03	99.98	1	0	1					16	3972.67	99.99	1	0	1
17	3943.55	99.26	1	0	1					17	3972.5	99.99	1	0	1
18	3967.33	99.86	1	0	1					18	3969.12	99.9	1	0	1
19	3972.5	99.99	1	0	1					19	3970.41	99.93	1	0	1
20	3972.35	99.98	1	0	1					20	3972.5	99.99	1	0	1
21	3972.35	99.98	1	0	1					21	3973	100	1	0	1
22	3973	100	1	0	1					22	3973.01	100	1	0	1
23	3966.86	99.85	1	0	1					23	3971.98	99.97	1	0	1
24	3972.03	99.98	1	0	1					24	3972.5	99.99	1	0	1
25	3972.67	99.99	1	0	1					25	3970.73	99.94	1	0	1
26	3973	100	1	0	1					26	3973.01	100	1	0	1
27	3972.67	99.99	1	0	1					27	3972.67	99.99	1	0	1
28	3970.73	99.94	1	0	1					28	3973	100	1	0	1
29	3968.15	99.88	1	0	1					29	3971.98	99.97	1	0	1
30	3923.38	98.75	1	0	1					30	3973	100	1	0	1
31	3971.98	99.97	1	0	1					31	3972.5	99.99	1	0	1
32	3951.84	99.47	1	0	1					32	3972.67	99.99	1	0	1
33	3968.5	99.89	1	0	1					33	3973.01	100	1	0	1
34	3968.88	99.9	1	0	1					34	3972.67	99.99	1	0	1
35	3955.55	99.56	1	0	1					35	3971.06	99.95	1	0	1
36	3968.88	99.9	1	0	1					36	3973.01	100	1	0	1
37	3972.67	99.99	1	0	1					37	3972.5	99.99	1	0	1
38	3971.98	99.97	1	0	1					38	3970.73	99.94	1	0	1
39	3970.73	99.94	1	0	1					39	3972.67	99.99	1	0	1
40	3972.67	99.99	1	0	1					40	3971.98	99.97	1	0	1
41	3799.67	95.64	1	0	1					41	3970.41	99.93	1	0	1
42	3972.35	99.98	1	0	1					42	3972.35	99.98	1	0	1
43	3971.46	99.96	1	0	1					43	3971.06	99.95	1	0	1
44	3970.41	99.93	1	0	1					44	3972.35	99.98	1	0	1
45	3971.7	99.97	1	0	1					45	3973.01	100	1	0	1
46	3961.04	99.7	1	0	1					46	3972.67	99.99	1	0	1
47	3968.88	99.9	1	0	1					47	3972.67	99.99	1	0	1
48	3972.35	99.98	1	0	1					48	3971.06	99.95	1	0	1
49	3970.73	99.94	1	0	1					49	3973	100	1	0	1
50	3966.21	99.83	1	0	1					50	3972.67	99.99	1	0	1
51	3893.4	98	1	0	1					51	3973.01	100	1	0	1
52	3965.78	99.82	1	0	1					52	3973	100	1	0	1
53	3964.27	99.78	1	0	1					53	3972.67	99.99	1	0	1
54	3954.51	99.53	1	0	1					54	3969.12	99.9	1	0	1
55	3968.29	99.88	1	0	1					55	3973.01	100	1	0	1
56	3973	100	1	0	1					56	3972.67	99.99	1	0	1
57	3970.09	99.93	1	0	1					57	3973	100	1	0	1
58	3942.3	99.23	1	0	1					58	3967.5	99.86	1	0	1
59	3967.18	99.85	1	0	1					59	3971.46	99.96	1	0	1
60	3971.98	99.97	1	0	1					60	3972.35	99.98	1	0	1
61	3970.09	99.93	1	0	1					61	3972.67	99.99	1	0	1
62	3951.14	99.45	1	0	1					62	3972.5	99.99	1	0	1
63	3969.12	99.9	1	0	1					63	3971.98	99.97	1	0	1
64	3972.67	99.99	1	0	1					64	3972.67	99.99	1	0	1
65	3967.84	99.87	1	0	1					65	3973.01	100	1	0	1
66	3970.43	99.94	1	0	1					66	3972.67	99.99	1	0	1
67	3968.36	99.88	1	0	1					67	3971.98	99.97	1	0	1
68	3973.01	100	1	0	1					68	3969.39	99.91	1	0	1
69	3959.05	99.65	1	0	1					69	3972.35	99.98	1	0	1
70	3965.56	99.81	1	0	1					70	3973	100	1	0	1
71	3970.41	99.93	1	0	1					71	3970.73	99.94	1	0	1
72	3972.5	99.99	1	0	1					72	3972.35	99.98	1	0	1
73	3972.35	99.98	1	0	1					73	3973	100	1	0	1
74	3972.67	99.99	1	0	1					74	3972.35	99.98	1	0	1
75	3967.33	99.86	1	0	1					75	3972.35	99.98	1	0	1
76	3971.06	99.95	1	0	1					76	3973	100	1	0	1
77	3970.09	99.93	1	0	1					77	3972.5	99.99	1	0	1
78	3973	100	1	0	1					78	3973	100	1	0	1
79	3971.98	99.97	1	0	1					79	3972.67	99.99	1	0	1
80	3968.88	99.9	1	0	1					80	3972.67	99.99	1	0	1
81	3972.35	99.98	1	0	1					81	3972.67	99.99	1	0	1
82	3970.41	99.93	1	0	1					82	3971.46	99.96	1	0	1
83	3972.03	99.98	1	0	1					83	3972.67	99.99	1	0	1
84	3961.04	99.7	1	0	1					84	3972.5	99.99	1	0	1
85	3972.35	99.98	1	0	1					85	3972.35	99.98	1	0	1
86	3972.67	99.99	1	0	1					86	3969.44	99.91	1	0	1
87	3972.35	99.98	1	0	1					87	3972.5	99.99	1	0	1
88	3970.09	99.93	1	0	1					88	3972.67	99.99	1	0	1
89	3972.35	99.98	1	0	1					89	3971.06	99.95	1	0	1
90	3971.06	99.95	1	0	1					90	3973.01	100	1	0	1
91	3965.26	99.8	1	0	1					91	3972.67	99.99	1	0	1
92	3969.12	99.9	1	0	1					92	3972.5	99.99	1	0	1
93	3973.01	100	1	0	1					93	3973.01	100	1	0	1
94	3972.67	99.99	1	0	1					94	3972.03	99.98	1	0	1
95	3968.36	99.88	1	0	1					95	3972.5	99.99	1	0	1
96	3964.59	99.79	1	0	1					96	3972.5	99.99	1	0	1
97	3970.41	99.93	1	0	1					97	3970.41	99.93	1	0	1
98	3972.67	99.99	1	0	1					98	3973	100	1	0	1
99	3952.33	99.48	1	0	1					99	3972.5	99.99	1	0	1
100	3962.67	99.74	1	0	1					100	3972.35	99.98	1	0	1
101	3970.41	99.93	1	0	1					101	3971.06	99.95	1	0	1
102	3960.83	99.69	1	0	1					102	3973	100	1	0	1
103	3972.35	99.98	1	0	1					103	3972.67	99.99	1	0	1
104	3964.27	99.78	1	0	1					104	3971.46	99.96	1	0	1
105	3970.95	99.95	1	0	1					105	3973	100	1	0	1
106	3962.66	99.74	1	0	1					106	3971.46	99.96	1	0	1
107	3973	100	1	0	1					107	3973.01	100	1	0	1
108	3972.03	99.98	1	0	1					108	3972.67	99.99	1	0	1
109	3972.03	99.98	1	0	1					109	3972.35	99.98	1	0	1
110	3964.22	99.78	1	0	1					110	3973	100	1	0	1
111	3964.22	99.78	1	0	1					111	3971.46	99.96	1	0	1
112	3968.47	99.89	1	0	1					112	3973	100	1	0	1
113	3970.41	99.93	1	0	1					113	3972.35	99.98	1	0	1
114	3963.3	99.76	1	0	1					114	3973	100	1	0	1
115	3966.53	99.84	1	0	1					115	3972.35	99.98	1	0	1
116	3916.14	98.57	1	0	1					116	3971.46	99.96	1	0	1
117	3965.78	99.82	1	0	1					117	3972.5	99.99	1	0	1
118	3970.41	99.93	1	0	1					118	3972.67	99.99	1	0	1
119	3968.82	99.89	1	0	1					119	3973	100	1	0	1
120	3972.67	99.99	1	0	1					120	3972.67	99.99	1	0	1
121	3969.39	99.91	1	0	1					121	3971.98	99.97	1	0	1
122	3939.93	99.17	1	0	1					122	3973	100	1	0	1
123	3970.41	99.93	1	0	1					123	3973	100	1	0	1
124	3973	100	1	0	1					124	3972.67	99.99	1	0	1
125	3971.46	99.96	1	0	1					125	3970.73	99.94	1	0	1
126	3968.47	99.89	1	0	1					126	3973.01	100	1	0	1
127	3972.35	99.98	1	0	1					127	3973	100	1	0	1
128	3972.35	99.98	1	0	1					128	3971.46	99.96	1	0	1
129	3972.5	99.99	1	0	1					129	3970.41	99.93	1	0	1
130	3961.64	99.71	1	0	1					130	3970.73	99.94	1	0	1
131	3972.5	99.99	1	0	1					131	3971.98	99.97	1	0	1
132	3971.46	99.96	1	0	1					132	3972.67	99.99	1	0	1
133	3971.98	99.97	1	0	1					133	3972.35	99.98	1	0	1
134	3968.8	99.89	1	0	1					134	3973.01	100	1	0	1
135	3972.03	99.98	1	0	1					135	3972.35	99.98	1	0	1
136	3969.91	99.92	1	0	1					136	3973.01	100	1	0	1
137	3964.27	99.78	1	0	1					137	3972.67	99.99	1	0	1
138	3966.86	99.85	1	0	1					138	3972.5	99.99	1	0	1
139	3971.98	99.97	1	0	1					139	3972.67	99.99	1	0	1
140	3971.06	99.95	1	0	1					140	3972.67	99.99	1	0	1
141	3968.47	99.89	1	0	1					141	3972.67	99.99	1	0	1
142	3968.88	99.9	1	0	1					142	3972.35	99.98	1	0	1
143	3973	100	1	0	1					143	3973	100	1	0	1
144	3960.07	99.67	1	0	1					144	3971.46	99.96	1	0	1
145	3971.98	99.97	1	0	1					145	3972.5	99.99	1	0	1
146	3967.97	99.87	1	0	1					146	3971.98	99.97	1	0	1
147	3966.88	99.85	1	0	1					147	3972.67	99.99	1	0	1
148	3973	100	1	0	1					148	3971.06	99.95	1	0	1
149	3972.67	99.99	1	0	1					149	3971.06	99.95	1	0	1
150	3966.24	99.83	1	0	1					150	3973.01	100	1	0	1
151	3964.59	99.79	1	0	1					151	3972.35	99.98	1	0	1
152	3970.43	99.94	1	0	1					152	3972.35	99.98	1	0	1
153	3955.22	99.55	1	0	1					153	3972.35	99.98	1	0	1
154	3972.5	99.99	1	0	1					154	3972.35	99.98	1	0	1
155	3973.01	100	1	0	1					155	3972.03	99.98	1	0	1
156	3971.46	99.96	1	0	1					156	3972.5	99.99	1	0	1
157	3970.43	99.94	1	0	1					157	3969.39	99.91	1	0	1
158	3931.4	98.95	1	0	1					158	3971.98	99.97	1	0	1
159	3972.35	99.98	1	0	1					159	3972.35	99.98	1	0	1
160	3959.57	99.66	1	0	1					160	3973.01	100	1	0	1
161	3967.82	99.87	1	0	1					161	3973	100	1	0	1
162	3971.98	99.97	1	0	1					162	3971.06	99.95	1	0	1
163	3965.89	99.82	1	0	1					163	3969.12	99.9	1	0	1
164	3972.03	99.98	1	0	1					164	3973	100	1	0	1
165	3970.73	99.94	1	0	1					165	3972.35	99.98	1	0	1
166	3973	100	1	0	1					166	3972.67	99.99	1	0	1
167	3972.35	99.98	1	0	1					167	3972.5	99.99	1	0	1
168	3964.59	99.79	1	0	1					168	3972.67	99.99	1	0	1
169	3971.46	99.96	1	0	1					169	3973	100	1	0	1
170	3968.36	99.88	1	0	1					170	3973	100	1	0	1
171	3971.98	99.97	1	0	1					171	3972.67	99.99	1	0	1
172	3972.35	99.98	1	0	1					172	3973.01	100	1	0	1
173	3958.25	99.63	1	0	1					173	3971.98	99.97	1	0	1
174	3972.35	99.98	1	0	1					174	3972.03	99.98	1	0	1
175	3972.35	99.98	1	0	1					175	3970.73	99.94	1	0	1
176	3967.84	99.87	1	0	1					176	3972.5	99.99	1	0	1
177	3967.5	99.86	1	0	1					177	3972.67	99.99	1	0	1
178	3963.19	99.75	1	0	1					178	3973	100	1	0	1
179	3966.86	99.85	1	0	1					179	3971.46	99.96	1	0	1
180	3971.46	99.96	1	0	1					180	3971.98	99.97	1	0	1
181	3972.5	99.99	1	0	1					181	3973.01	100	1	0	1
182	3945.61	99.31	1	0	1					182	3971.06	99.95	1	0	1
183	3970.73	99.94	1	0	1					183	3972.5	99.99	1	0	1
184	3951.43	99.46	1	0	1					184	3972.67	99.99	1	0	1
185	3972.5	99.99	1	0	1					185	3972.35	99.98	1	0	1
186	3972.35	99.98	1	0	1					186	3971.46	99.96	1	0	1
187	3972.35	99.98	1	0	1					187	3972.67	99.99	1	0	1
188	3970.73	99.94	1	0	1					188	3971.46	99.96	1	0	1
189	3964.74	99.79	1	0	1					189	3970.41	99.93	1	0	1
190	3972.03	99.98	1	0	1					190	3973.01	100	1	0	1
191	3968.36	99.88	1	0	1					191	3971.98	99.97	1	0	1
192	3962.16	99.73	1	0	1					192	3972.67	99.99	1	0	1
193	3971.98	99.97	1	0	1					193	3972.5	99.99	1	0	1
194	3972.5	99.99	1	0	1					194	3972.67	99.99	1	0	1
195	3960.51	99.69	1	0	1					195	3973	100	1	0	1
196	3973	100	1	0	1					196	3973	100	1	0	1
197	3972.67	99.99	1	0	1					197	3972.67	99.99	1	0	1
198	3951.76	99.47	1	0	1					198	3973	100	1	0	1
199	3968.36	99.88	1	0	1					199	3970.73	99.94	1	0	1
200	3972.67	99.99	1	0	1					200	3973	100	1	0	1

## Sheet: 04_EHCFMMACO_Seeds(75)
Fast Converegnce Exp							Fast Converegnce Exp			Slow Converegnce Exp							Slow Converegnce Exp
#	CBLF	Quality	Taumax	Taumin	DeltaTauminmax		Global Optimal Solution =	3973.01		#	CBLF	Quality	Taumax	Taumin	DeltaTauminmax		Global Optimal Solution =	3973.01
1	3966.53	99.84	1	0	1		Minimum Optimal Solution =	3883.57		1	3968.8	99.89	1	0	1		Minimum Optimal Solution =	3967.5
2	3973.01	100	1	0	1		Mean of Optimal Solution =	3964.44		2	3972.35	99.98	1	0	1		Mean of Optimal Solution =	3972.18
3	3954.92	99.54	1	0	1		Median of Optimal Solution =	3964.44		3	3972.03	99.98	1	0	1		Median of Optimal Solution =	3972.18
4	3968.5	99.89	1	0	1		Solution Standrad Deviation =	16.4936		4	3972.67	99.99	1	0	1		Solution Standrad Deviation =	1.0279
5	3973	100	1	0	1		Average Price =	27.34		5	3973	100	1	0	1		Average Price =	92.08
6	3970.73	99.94	1	0	1		Relability =	59		6	3973.01	100	1	0	1		Relability =	98
7	3972.35	99.98	1	0	1		Normalized Price =	46.339		7	3972.67	99.99	1	0	1		Normalized Price =	93.9592
8	3970.73	99.94	1	0	1		Average Solution Quality =	99.7844		8	3972.67	99.99	1	0	1		Average Solution Quality =	99.9791
9	3971.46	99.96	1	0	1		Average FDC =	-200.95		9	3971.98	99.97	1	0	1		Average FDC =	-89.5662
10	3973.01	100	1	0	1		Correlation Coefficent =	-1		10	3972.03	99.98	1	0	1		Correlation Coefficent =	-0.74662
11	3970.95	99.95	1	0	1		Solution Robustness =	240.362		11	3973.01	100	1	0	1		Solution Robustness =	3864.46
12	3970.41	99.93	1	0	1		Performance Rate =	0.02158		12	3972.67	99.99	1	0	1		Performance Rate =	0.010643
13	3884.61	97.77	1	0	1		Average Elapsed Time =	1.322		13	3971.98	99.97	1	0	1		Average Elapsed Time =	4.3089
14	3965.26	99.8	1	0	1					14	3970.41	99.93	1	0	1
15	3973.01	100	1	0	1					15	3971.98	99.97	1	0	1
16	3966.53	99.84	1	0	1					16	3972.35	99.98	1	0	1
17	3966.53	99.84	1	0	1					17	3973	100	1	0	1
18	3965.89	99.82	1	0	1					18	3971.98	99.97	1	0	1
19	3901.25	98.19	1	0	1					19	3971.46	99.96	1	0	1
20	3970.73	99.94	1	0	1					20	3973.01	100	1	0	1
21	3973	100	1	0	1					21	3971.98	99.97	1	0	1
22	3964.92	99.8	1	0	1					22	3973.01	100	1	0	1
23	3972.5	99.99	1	0	1					23	3972.67	99.99	1	0	1
24	3929.59	98.91	1	0	1					24	3971.46	99.96	1	0	1
25	3966.86	99.85	1	0	1					25	3972.5	99.99	1	0	1
26	3962.15	99.73	1	0	1					26	3971.46	99.96	1	0	1
27	3968.88	99.9	1	0	1					27	3973	100	1	0	1
28	3972.35	99.98	1	0	1					28	3972.35	99.98	1	0	1
29	3971.98	99.97	1	0	1					29	3972.35	99.98	1	0	1
30	3970.41	99.93	1	0	1					30	3972.35	99.98	1	0	1
31	3973.01	100	1	0	1					31	3973	100	1	0	1
32	3971.46	99.96	1	0	1					32	3972.35	99.98	1	0	1
33	3971.98	99.97	1	0	1					33	3972.67	99.99	1	0	1
34	3967.84	99.87	1	0	1					34	3973.01	100	1	0	1
35	3971.52	99.96	1	0	1					35	3972.35	99.98	1	0	1
36	3954.92	99.54	1	0	1					36	3973	100	1	0	1
37	3970.09	99.93	1	0	1					37	3973	100	1	0	1
38	3963.09	99.75	1	0	1					38	3970.73	99.94	1	0	1
39	3969.39	99.91	1	0	1					39	3969.44	99.91	1	0	1
40	3970.41	99.93	1	0	1					40	3971.46	99.96	1	0	1
41	3970.41	99.93	1	0	1					41	3972.35	99.98	1	0	1
42	3972.35	99.98	1	0	1					42	3972.03	99.98	1	0	1
43	3905.74	98.31	1	0	1					43	3969.12	99.9	1	0	1
44	3884.61	97.77	1	0	1					44	3972.35	99.98	1	0	1
45	3971.46	99.96	1	0	1					45	3973	100	1	0	1
46	3972.67	99.99	1	0	1					46	3972.67	99.99	1	0	1
47	3972.35	99.98	1	0	1					47	3972.03	99.98	1	0	1
48	3968.36	99.88	1	0	1					48	3970.41	99.93	1	0	1
49	3972.67	99.99	1	0	1					49	3972.35	99.98	1	0	1
50	3972.35	99.98	1	0	1					50	3972.5	99.99	1	0	1
51	3971.46	99.96	1	0	1					51	3972.5	99.99	1	0	1
52	3968.88	99.9	1	0	1					52	3972.35	99.98	1	0	1
53	3959.89	99.67	1	0	1					53	3972.35	99.98	1	0	1
54	3971.98	99.97	1	0	1					54	3973	100	1	0	1
55	3972.03	99.98	1	0	1					55	3973	100	1	0	1
56	3959.75	99.67	1	0	1					56	3972.5	99.99	1	0	1
57	3959.13	99.65	1	0	1					57	3973	100	1	0	1
58	3958.54	99.64	1	0	1					58	3973.01	100	1	0	1
59	3958.57	99.64	1	0	1					59	3972.35	99.98	1	0	1
60	3973.01	100	1	0	1					60	3972.67	99.99	1	0	1
61	3973.01	100	1	0	1					61	3971.98	99.97	1	0	1
62	3951.43	99.46	1	0	1					62	3972.67	99.99	1	0	1
63	3953.28	99.5	1	0	1					63	3972.35	99.98	1	0	1
64	3972.35	99.98	1	0	1					64	3972.67	99.99	1	0	1
65	3972.35	99.98	1	0	1					65	3972.03	99.98	1	0	1
66	3968.15	99.88	1	0	1					66	3972.67	99.99	1	0	1
67	3972.03	99.98	1	0	1					67	3972.03	99.98	1	0	1
68	3971.98	99.97	1	0	1					68	3973	100	1	0	1
69	3968.15	99.88	1	0	1					69	3972.35	99.98	1	0	1
70	3965.26	99.8	1	0	1					70	3973.01	100	1	0	1
71	3957.6	99.61	1	0	1					71	3972.35	99.98	1	0	1
72	3959.57	99.66	1	0	1					72	3970.41	99.93	1	0	1
73	3966.86	99.85	1	0	1					73	3971.46	99.96	1	0	1
74	3937.34	99.1	1	0	1					74	3971.46	99.96	1	0	1
75	3949.43	99.41	1	0	1					75	3973.01	100	1	0	1
76	3972.67	99.99	1	0	1					76	3971.98	99.97	1	0	1
77	3972.5	99.99	1	0	1					77	3970.73	99.94	1	0	1
78	3943.55	99.26	1	0	1					78	3972.67	99.99	1	0	1
79	3968.88	99.9	1	0	1					79	3972.67	99.99	1	0	1
80	3967.97	99.87	1	0	1					80	3972.35	99.98	1	0	1
81	3957.51	99.61	1	0	1					81	3972.67	99.99	1	0	1
82	3966.88	99.85	1	0	1					82	3972.5	99.99	1	0	1
83	3972.03	99.98	1	0	1					83	3972.35	99.98	1	0	1
84	3971.98	99.97	1	0	1					84	3972.35	99.98	1	0	1
85	3972.5	99.99	1	0	1					85	3972.35	99.98	1	0	1
86	3969.12	99.9	1	0	1					86	3972.35	99.98	1	0	1
87	3972.5	99.99	1	0	1					87	3972.35	99.98	1	0	1
88	3971.46	99.96	1	0	1					88	3971.46	99.96	1	0	1
89	3971.06	99.95	1	0	1					89	3972.67	99.99	1	0	1
90	3970.09	99.93	1	0	1					90	3972.35	99.98	1	0	1
91	3973	100	1	0	1					91	3972.35	99.98	1	0	1
92	3955.44	99.56	1	0	1					92	3973	100	1	0	1
93	3972.35	99.98	1	0	1					93	3971.06	99.95	1	0	1
94	3972.5	99.99	1	0	1					94	3970.73	99.94	1	0	1
95	3973	100	1	0	1					95	3973.01	100	1	0	1
96	3973	100	1	0	1					96	3972.67	99.99	1	0	1
97	3964.27	99.78	1	0	1					97	3972.35	99.98	1	0	1
98	3946.65	99.34	1	0	1					98	3973.01	100	1	0	1
99	3972.5	99.99	1	0	1					99	3973.01	100	1	0	1
100	3906.32	98.32	1	0	1					100	3973	100	1	0	1
101	3968.88	99.9	1	0	1					101	3971.98	99.97	1	0	1
102	3951.02	99.45	1	0	1					102	3973	100	1	0	1
103	3905.29	98.3	1	0	1					103	3972.67	99.99	1	0	1
104	3973.01	100	1	0	1					104	3971.06	99.95	1	0	1
105	3970.73	99.94	1	0	1					105	3973.01	100	1	0	1
106	3972.35	99.98	1	0	1					106	3969.12	99.9	1	0	1
107	3973	100	1	0	1					107	3972.67	99.99	1	0	1
108	3972.67	99.99	1	0	1					108	3973.01	100	1	0	1
109	3972.67	99.99	1	0	1					109	3973	100	1	0	1
110	3958.57	99.64	1	0	1					110	3972.67	99.99	1	0	1
111	3970.95	99.95	1	0	1					111	3971.98	99.97	1	0	1
112	3972.67	99.99	1	0	1					112	3973	100	1	0	1
113	3970.41	99.93	1	0	1					113	3973.01	100	1	0	1
114	3973.01	100	1	0	1					114	3972.5	99.99	1	0	1
115	3973	100	1	0	1					115	3968.88	99.9	1	0	1
116	3959.1	99.65	1	0	1					116	3969.12	99.9	1	0	1
117	3972.35	99.98	1	0	1					117	3972.5	99.99	1	0	1
118	3972.35	99.98	1	0	1					118	3971.98	99.97	1	0	1
119	3972.03	99.98	1	0	1					119	3972.35	99.98	1	0	1
120	3955.95	99.57	1	0	1					120	3972.35	99.98	1	0	1
121	3973.01	100	1	0	1					121	3969.12	99.9	1	0	1
122	3973	100	1	0	1					122	3969.39	99.91	1	0	1
123	3970.41	99.93	1	0	1					123	3973.01	100	1	0	1
124	3972.5	99.99	1	0	1					124	3972.35	99.98	1	0	1
125	3972.17	99.98	1	0	1					125	3972.03	99.98	1	0	1
126	3928.03	98.87	1	0	1					126	3973.01	100	1	0	1
127	3961.68	99.71	1	0	1					127	3973	100	1	0	1
128	3973.01	100	1	0	1					128	3972.5	99.99	1	0	1
129	3972.03	99.98	1	0	1					129	3972.67	99.99	1	0	1
130	3902.82	98.23	1	0	1					130	3968.88	99.9	1	0	1
131	3968.47	99.89	1	0	1					131	3972.67	99.99	1	0	1
132	3968.15	99.88	1	0	1					132	3972.67	99.99	1	0	1
133	3973	100	1	0	1					133	3972.5	99.99	1	0	1
134	3972.35	99.98	1	0	1					134	3967.5	99.86	1	0	1
135	3970.73	99.94	1	0	1					135	3971.46	99.96	1	0	1
136	3972.35	99.98	1	0	1					136	3972.67	99.99	1	0	1
137	3968.8	99.89	1	0	1					137	3971.98	99.97	1	0	1
138	3970.43	99.94	1	0	1					138	3971.46	99.96	1	0	1
139	3971.46	99.96	1	0	1					139	3973.01	100	1	0	1
140	3970.73	99.94	1	0	1					140	3970.41	99.93	1	0	1
141	3971.98	99.97	1	0	1					141	3972.03	99.98	1	0	1
142	3883.57	97.75	1	0	1					142	3971.98	99.97	1	0	1
143	3972.67	99.99	1	0	1					143	3970.09	99.93	1	0	1
144	3970.73	99.94	1	0	1					144	3969.44	99.91	1	0	1
145	3966.53	99.84	1	0	1					145	3973	100	1	0	1
146	3966.03	99.82	1	0	1					146	3972.03	99.98	1	0	1
147	3968.8	99.89	1	0	1					147	3972.35	99.98	1	0	1
148	3958.45	99.63	1	0	1					148	3973	100	1	0	1
149	3970.41	99.93	1	0	1					149	3969.39	99.91	1	0	1
150	3972.35	99.98	1	0	1					150	3972.5	99.99	1	0	1
151	3973	100	1	0	1					151	3973.01	100	1	0	1
152	3970.73	99.94	1	0	1					152	3972.67	99.99	1	0	1
153	3973.01	100	1	0	1					153	3972.35	99.98	1	0	1
154	3973	100	1	0	1					154	3972.67	99.99	1	0	1
155	3968.88	99.9	1	0	1					155	3973	100	1	0	1
156	3964.59	99.79	1	0	1					156	3971.98	99.97	1	0	1
157	3952.96	99.5	1	0	1					157	3973.01	100	1	0	1
158	3972.35	99.98	1	0	1					158	3973.01	100	1	0	1
159	3966.53	99.84	1	0	1					159	3972.67	99.99	1	0	1
160	3972.35	99.98	1	0	1					160	3971.98	99.97	1	0	1
161	3972.35	99.98	1	0	1					161	3972.03	99.98	1	0	1
162	3958.54	99.64	1	0	1					162	3973	100	1	0	1
163	3972.67	99.99	1	0	1					163	3972.5	99.99	1	0	1
164	3970.73	99.94	1	0	1					164	3971.98	99.97	1	0	1
165	3969.12	99.9	1	0	1					165	3972.35	99.98	1	0	1
166	3972.5	99.99	1	0	1					166	3971.98	99.97	1	0	1
167	3972.35	99.98	1	0	1					167	3971.06	99.95	1	0	1
168	3972.03	99.98	1	0	1					168	3973	100	1	0	1
169	3965.26	99.8	1	0	1					169	3973.01	100	1	0	1
170	3973	100	1	0	1					170	3972.35	99.98	1	0	1
171	3949.23	99.4	1	0	1					171	3973.01	100	1	0	1
172	3970.41	99.93	1	0	1					172	3973.01	100	1	0	1
173	3971.98	99.97	1	0	1					173	3971.98	99.97	1	0	1
174	3970.95	99.95	1	0	1					174	3972.67	99.99	1	0	1
175	3967.18	99.85	1	0	1					175	3972.5	99.99	1	0	1
176	3971.46	99.96	1	0	1					176	3972.5	99.99	1	0	1
177	3961.12	99.7	1	0	1					177	3973	100	1	0	1
178	3970.41	99.93	1	0	1					178	3972.35	99.98	1	0	1
179	3973.01	100	1	0	1					179	3972.35	99.98	1	0	1
180	3967.32	99.86	1	0	1					180	3971.46	99.96	1	0	1
181	3972.17	99.98	1	0	1					181	3972.03	99.98	1	0	1
182	3973	100	1	0	1					182	3972.67	99.99	1	0	1
183	3964.92	99.8	1	0	1					183	3971.98	99.97	1	0	1
184	3960.51	99.69	1	0	1					184	3973.01	100	1	0	1
185	3971.46	99.96	1	0	1					185	3972.67	99.99	1	0	1
186	3965.78	99.82	1	0	1					186	3972.67	99.99	1	0	1
187	3963.09	99.75	1	0	1					187	3972.67	99.99	1	0	1
188	3962.36	99.73	1	0	1					188	3972.67	99.99	1	0	1
189	3970.73	99.94	1	0	1					189	3973	100	1	0	1
190	3973.01	100	1	0	1					190	3973	100	1	0	1
191	3936.31	99.08	1	0	1					191	3972.5	99.99	1	0	1
192	3973.01	100	1	0	1					192	3972.67	99.99	1	0	1
193	3972.67	99.99	1	0	1					193	3969.39	99.91	1	0	1
194	3935.46	99.05	1	0	1					194	3971.98	99.97	1	0	1
195	3972.67	99.99	1	0	1					195	3972.5	99.99	1	0	1
196	3972.5	99.99	1	0	1					196	3972.5	99.99	1	0	1
197	3968.88	99.9	1	0	1					197	3972.67	99.99	1	0	1
198	3964.92	99.8	1	0	1					198	3973	100	1	0	1
199	3918.21	98.62	1	0	1					199	3973.01	100	1	0	1
200	3970.73	99.94	1	0	1					200	3973	100	1	0	1

## Sheet: 05_EHCFMMACO_Seeds(111)
Fast Converegnce Exp							Fast Converegnce Exp			Slow Converegnce Exp							Slow Converegnce Exp
#	CBLF	Quality	Taumax	Taumin	DeltaTauminmax		Global Optimal Solution =	3973.01		#	CBLF	Quality	Taumax	Taumin	DeltaTauminmax		Global Optimal Solution =	3973.01
1	3968.47	99.89	1	0	1		Minimum Optimal Solution=	3834.98		1	3972.35	99.98	1	0	1		Minimum Optimal Solution =	3967.5
2	3966.86	99.85	1	0	1		Mean of Optimal Solution =	3963.7		2	3971.46	99.96	1	0	1		Mean of Optimal Solution =	3972.27
3	3967.18	99.85	1	0	1		Median of Optimal Solution =	3963.7		3	3972.35	99.98	1	0	1		Median of Optimal Solution =	3972.27
4	3960.42	99.68	1	0	1		Solution Standrad Deviation=	18.5312		4	3972.67	99.99	1	0	1		Solution Standrad Deviation =	0.93171
5	3966.38	99.83	1	0	1		Average Price =	27.195		5	3971.06	99.95	1	0	1		Average Price =	91.85
6	3966.24	99.83	1	0	1		Relability =	54		6	3969.44	99.91	1	0	1		Relability =	98
7	3972.35	99.98	1	0	1		Normalized Price =	50.3611		7	3970.73	99.94	1	0	1		Normalized Price =	93.7245
8	3970.09	99.93	1	0	1		Average Solution Quality =	99.7657		8	3972.67	99.99	1	0	1		Average Solution Quality =	99.9814
9	3972.67	99.99	1	0	1		Average FDC =	-213.433		9	3972.35	99.98	1	0	1		Average FDC =	-92.6405
10	3972.67	99.99	1	0	1		Correlation Coefficent =	-0.77788		10	3972.67	99.99	1	0	1		Correlation Coefficent =	-0.75117
11	3972.03	99.98	1	0	1		Solution Robustness =	213.893		11	3972.03	99.98	1	0	1		Solution Robustness =	4263.43
12	3969.58	99.91	1	0	1		Performance Rate =	0.019857		12	3971.46	99.96	1	0	1		Performance Rate =	0.01067
13	3971.98	99.97	1	0	1		Average Elapsed Time =	1.307		13	3972.35	99.98	1	0	1		Average Elapsed Time =	4.2728
14	3957.81	99.62	1	0	1					14	3972.35	99.98	1	0	1
15	3972.67	99.99	1	0	1					15	3972.67	99.99	1	0	1
16	3968.15	99.88	1	0	1					16	3972.35	99.98	1	0	1
17	3855.66	97.05	1	0	1					17	3972.35	99.98	1	0	1
18	3948.72	99.39	1	0	1					18	3973	100	1	0	1
19	3970.73	99.94	1	0	1					19	3971.06	99.95	1	0	1
20	3933.87	99.01	1	0	1					20	3973.01	100	1	0	1
21	3968.88	99.9	1	0	1					21	3972.67	99.99	1	0	1
22	3970.73	99.94	1	0	1					22	3972.67	99.99	1	0	1
23	3970.73	99.94	1	0	1					23	3972.67	99.99	1	0	1
24	3933.72	99.01	1	0	1					24	3971.46	99.96	1	0	1
25	3969.39	99.91	1	0	1					25	3973.01	100	1	0	1
26	3972.35	99.98	1	0	1					26	3971.98	99.97	1	0	1
27	3947.47	99.36	1	0	1					27	3973.01	100	1	0	1
28	3959.42	99.66	1	0	1					28	3972.35	99.98	1	0	1
29	3972.17	99.98	1	0	1					29	3970.73	99.94	1	0	1
30	3961.36	99.71	1	0	1					30	3972.67	99.99	1	0	1
31	3964.27	99.78	1	0	1					31	3972.35	99.98	1	0	1
32	3972.67	99.99	1	0	1					32	3972.03	99.98	1	0	1
33	3969.44	99.91	1	0	1					33	3972.35	99.98	1	0	1
34	3971.98	99.97	1	0	1					34	3972.67	99.99	1	0	1
35	3971.06	99.95	1	0	1					35	3972.35	99.98	1	0	1
36	3963.95	99.77	1	0	1					36	3972.35	99.98	1	0	1
37	3971.38	99.96	1	0	1					37	3972.03	99.98	1	0	1
38	3957.16	99.6	1	0	1					38	3971.98	99.97	1	0	1
39	3967.18	99.85	1	0	1					39	3972.67	99.99	1	0	1
40	3930.62	98.93	1	0	1					40	3972.67	99.99	1	0	1
41	3972.35	99.98	1	0	1					41	3971.98	99.97	1	0	1
42	3971.06	99.95	1	0	1					42	3973	100	1	0	1
43	3973.01	100	1	0	1					43	3972.35	99.98	1	0	1
44	3953.63	99.51	1	0	1					44	3973.01	100	1	0	1
45	3964.92	99.8	1	0	1					45	3972.35	99.98	1	0	1
46	3969.12	99.9	1	0	1					46	3972.67	99.99	1	0	1
47	3966.53	99.84	1	0	1					47	3971.06	99.95	1	0	1
48	3971.98	99.97	1	0	1					48	3972.5	99.99	1	0	1
49	3973	100	1	0	1					49	3973	100	1	0	1
50	3892.36	97.97	1	0	1					50	3972.67	99.99	1	0	1
51	3925.65	98.81	1	0	1					51	3972.35	99.98	1	0	1
52	3972.67	99.99	1	0	1					52	3972.67	99.99	1	0	1
53	3973.01	100	1	0	1					53	3973	100	1	0	1
54	3972.67	99.99	1	0	1					54	3969.12	99.9	1	0	1
55	3972.67	99.99	1	0	1					55	3973	100	1	0	1
56	3972.67	99.99	1	0	1					56	3972.67	99.99	1	0	1
57	3966.53	99.84	1	0	1					57	3972.5	99.99	1	0	1
58	3884.14	97.76	1	0	1					58	3971.98	99.97	1	0	1
59	3971.52	99.96	1	0	1					59	3972.35	99.98	1	0	1
60	3939.34	99.15	1	0	1					60	3973	100	1	0	1
61	3969.44	99.91	1	0	1					61	3971.46	99.96	1	0	1
62	3965.24	99.8	1	0	1					62	3973.01	100	1	0	1
63	3972.67	99.99	1	0	1					63	3972.67	99.99	1	0	1
64	3970.41	99.93	1	0	1					64	3972.67	99.99	1	0	1
65	3965.26	99.8	1	0	1					65	3973.01	100	1	0	1
66	3968.88	99.9	1	0	1					66	3972.5	99.99	1	0	1
67	3972.5	99.99	1	0	1					67	3972.67	99.99	1	0	1
68	3973	100	1	0	1					68	3973	100	1	0	1
69	3972.35	99.98	1	0	1					69	3972.67	99.99	1	0	1
70	3969.91	99.92	1	0	1					70	3972.03	99.98	1	0	1
71	3972.67	99.99	1	0	1					71	3971.98	99.97	1	0	1
72	3972.35	99.98	1	0	1					72	3972.5	99.99	1	0	1
73	3971.46	99.96	1	0	1					73	3972.67	99.99	1	0	1
74	3967.82	99.87	1	0	1					74	3970.73	99.94	1	0	1
75	3911.29	98.45	1	0	1					75	3973.01	100	1	0	1
76	3921.31	98.7	1	0	1					76	3971.46	99.96	1	0	1
77	3968.36	99.88	1	0	1					77	3972.67	99.99	1	0	1
78	3971.98	99.97	1	0	1					78	3972.35	99.98	1	0	1
79	3972.35	99.98	1	0	1					79	3972.35	99.98	1	0	1
80	3966.86	99.85	1	0	1					80	3973.01	100	1	0	1
81	3973.01	100	1	0	1					81	3972.35	99.98	1	0	1
82	3967.18	99.85	1	0	1					82	3972.67	99.99	1	0	1
83	3972.35	99.98	1	0	1					83	3972.67	99.99	1	0	1
84	3966.56	99.84	1	0	1					84	3972.5	99.99	1	0	1
85	3971.46	99.96	1	0	1					85	3972.67	99.99	1	0	1
86	3967.5	99.86	1	0	1					86	3970.41	99.93	1	0	1
87	3965.26	99.8	1	0	1					87	3973.01	100	1	0	1
88	3973	100	1	0	1					88	3973	100	1	0	1
89	3965.24	99.8	1	0	1					89	3970.73	99.94	1	0	1
90	3972.67	99.99	1	0	1					90	3972.35	99.98	1	0	1
91	3958.78	99.64	1	0	1					91	3972.67	99.99	1	0	1
92	3968.61	99.89	1	0	1					92	3973.01	100	1	0	1
93	3973	100	1	0	1					93	3971.98	99.97	1	0	1
94	3972.5	99.99	1	0	1					94	3972.5	99.99	1	0	1
95	3892.88	97.98	1	0	1					95	3972.67	99.99	1	0	1
96	3968.36	99.88	1	0	1					96	3973	100	1	0	1
97	3972.67	99.99	1	0	1					97	3971.98	99.97	1	0	1
98	3972.5	99.99	1	0	1					98	3971.06	99.95	1	0	1
99	3972.5	99.99	1	0	1					99	3972.67	99.99	1	0	1
100	3942.39	99.23	1	0	1					100	3972.67	99.99	1	0	1
101	3971.98	99.97	1	0	1					101	3971.98	99.97	1	0	1
102	3972.67	99.99	1	0	1					102	3972.67	99.99	1	0	1
103	3968.47	99.89	1	0	1					103	3972.5	99.99	1	0	1
104	3972.67	99.99	1	0	1					104	3973	100	1	0	1
105	3972.67	99.99	1	0	1					105	3972.35	99.98	1	0	1
106	3971.06	99.95	1	0	1					106	3972.35	99.98	1	0	1
107	3966.53	99.84	1	0	1					107	3973.01	100	1	0	1
108	3972.5	99.99	1	0	1					108	3972.67	99.99	1	0	1
109	3973.01	100	1	0	1					109	3972.35	99.98	1	0	1
110	3967.84	99.87	1	0	1					110	3972.67	99.99	1	0	1
111	3966.88	99.85	1	0	1					111	3971.98	99.97	1	0	1
112	3972.03	99.98	1	0	1					112	3973	100	1	0	1
113	3970.73	99.94	1	0	1					113	3973	100	1	0	1
114	3953.7	99.51	1	0	1					114	3972.67	99.99	1	0	1
115	3961.83	99.72	1	0	1					115	3972.35	99.98	1	0	1
116	3965.26	99.8	1	0	1					116	3972.5	99.99	1	0	1
117	3962.67	99.74	1	0	1					117	3973	100	1	0	1
118	3973	100	1	0	1					118	3973.01	100	1	0	1
119	3968.88	99.9	1	0	1					119	3972.5	99.99	1	0	1
120	3968.88	99.9	1	0	1					120	3972.35	99.98	1	0	1
121	3969.39	99.91	1	0	1					121	3971.98	99.97	1	0	1
122	3930.62	98.93	1	0	1					122	3973	100	1	0	1
123	3962.16	99.73	1	0	1					123	3972.35	99.98	1	0	1
124	3972.03	99.98	1	0	1					124	3972.5	99.99	1	0	1
125	3971.06	99.95	1	0	1					125	3971.46	99.96	1	0	1
126	3972.03	99.98	1	0	1					126	3970.41	99.93	1	0	1
127	3960.83	99.69	1	0	1					127	3972.67	99.99	1	0	1
128	3971.46	99.96	1	0	1					128	3970.41	99.93	1	0	1
129	3972.67	99.99	1	0	1					129	3973.01	100	1	0	1
130	3966.86	99.85	1	0	1					130	3973	100	1	0	1
131	3970.95	99.95	1	0	1					131	3972.67	99.99	1	0	1
132	3966.86	99.85	1	0	1					132	3972.67	99.99	1	0	1
133	3972.35	99.98	1	0	1					133	3973.01	100	1	0	1
134	3968.88	99.9	1	0	1					134	3973.01	100	1	0	1
135	3970.09	99.93	1	0	1					135	3973.01	100	1	0	1
136	3969.91	99.92	1	0	1					136	3971.98	99.97	1	0	1
137	3972.5	99.99	1	0	1					137	3972.35	99.98	1	0	1
138	3972.35	99.98	1	0	1					138	3973.01	100	1	0	1
139	3970.73	99.94	1	0	1					139	3972.35	99.98	1	0	1
140	3971.46	99.96	1	0	1					140	3972.35	99.98	1	0	1
141	3973.01	100	1	0	1					141	3972.35	99.98	1	0	1
142	3972.5	99.99	1	0	1					142	3970.73	99.94	1	0	1
143	3963.95	99.77	1	0	1					143	3972.5	99.99	1	0	1
144	3939.41	99.15	1	0	1					144	3971.06	99.95	1	0	1
145	3972.35	99.98	1	0	1					145	3973.01	100	1	0	1
146	3961.36	99.71	1	0	1					146	3968.36	99.88	1	0	1
147	3972.67	99.99	1	0	1					147	3973	100	1	0	1
148	3968.88	99.9	1	0	1					148	3973.01	100	1	0	1
149	3972.35	99.98	1	0	1					149	3971.46	99.96	1	0	1
150	3970.09	99.93	1	0	1					150	3972.5	99.99	1	0	1
151	3972.5	99.99	1	0	1					151	3969.12	99.9	1	0	1
152	3965.24	99.8	1	0	1					152	3972.5	99.99	1	0	1
153	3968.8	99.89	1	0	1					153	3972.35	99.98	1	0	1
154	3968.88	99.9	1	0	1					154	3973	100	1	0	1
155	3920.36	98.67	1	0	1					155	3973	100	1	0	1
156	3964.59	99.79	1	0	1					156	3973.01	100	1	0	1
157	3949.23	99.4	1	0	1					157	3970.41	99.93	1	0	1
158	3955.34	99.56	1	0	1					158	3972.35	99.98	1	0	1
159	3968.88	99.9	1	0	1					159	3971.98	99.97	1	0	1
160	3973.01	100	1	0	1					160	3972.67	99.99	1	0	1
161	3970.73	99.94	1	0	1					161	3972.67	99.99	1	0	1
162	3834.98	96.53	1	0	1					162	3968.88	99.9	1	0	1
163	3973.01	100	1	0	1					163	3970.41	99.93	1	0	1
164	3972.67	99.99	1	0	1					164	3971.46	99.96	1	0	1
165	3952.33	99.48	1	0	1					165	3971.46	99.96	1	0	1
166	3972.5	99.99	1	0	1					166	3972.5	99.99	1	0	1
167	3971.52	99.96	1	0	1					167	3973.01	100	1	0	1
168	3955.55	99.56	1	0	1					168	3972.5	99.99	1	0	1
169	3948.05	99.37	1	0	1					169	3973	100	1	0	1
170	3956.95	99.6	1	0	1					170	3973	100	1	0	1
171	3961.04	99.7	1	0	1					171	3973	100	1	0	1
172	3972.67	99.99	1	0	1					172	3972.67	99.99	1	0	1
173	3971.98	99.97	1	0	1					173	3973	100	1	0	1
174	3973.01	100	1	0	1					174	3971.98	99.97	1	0	1
175	3969.26	99.91	1	0	1					175	3972.5	99.99	1	0	1
176	3973.01	100	1	0	1					176	3972.67	99.99	1	0	1
177	3972.67	99.99	1	0	1					177	3970.95	99.95	1	0	1
178	3972.67	99.99	1	0	1					178	3972.35	99.98	1	0	1
179	3959.05	99.65	1	0	1					179	3972.67	99.99	1	0	1
180	3969.12	99.9	1	0	1					180	3972.35	99.98	1	0	1
181	3970.09	99.93	1	0	1					181	3973.01	100	1	0	1
182	3971.98	99.97	1	0	1					182	3973.01	100	1	0	1
183	3964.59	99.79	1	0	1					183	3973.01	100	1	0	1
184	3962.98	99.75	1	0	1					184	3968.88	99.9	1	0	1
185	3964.59	99.79	1	0	1					185	3973	100	1	0	1
186	3959.05	99.65	1	0	1					186	3967.5	99.86	1	0	1
187	3961.04	99.7	1	0	1					187	3972.67	99.99	1	0	1
188	3971.46	99.96	1	0	1					188	3971.06	99.95	1	0	1
189	3971.7	99.97	1	0	1					189	3973	100	1	0	1
190	3968.36	99.88	1	0	1					190	3973.01	100	1	0	1
191	3972.67	99.99	1	0	1					191	3973	100	1	0	1
192	3971.46	99.96	1	0	1					192	3973	100	1	0	1
193	3972.35	99.98	1	0	1					193	3972.5	99.99	1	0	1
194	3964.59	99.79	1	0	1					194	3973	100	1	0	1
195	3941.28	99.2	1	0	1					195	3973.01	100	1	0	1
196	3956.31	99.58	1	0	1					196	3972.35	99.98	1	0	1
197	3960.72	99.69	1	0	1					197	3973	100	1	0	1
198	3973	100	1	0	1					198	3972.35	99.98	1	0	1
199	3972.5	99.99	1	0	1					199	3971.98	99.97	1	0	1
200	3971.46	99.96	1	0	1					200	3972.35	99.98	1	0	1

## Sheet: 06_EHCFMMACO_Seeds(200)
Fast Converegnce Exp							Fast Converegnce Exp			Slow Converegnce Exp							Slow Converegnce Exp
#	CBLF	Quality	Taumax	Taumin	DeltaTauminmax		Global Optimal Solution =	3973.01		#	CBLF	Quality	Taumax	Taumin	DeltaTauminmax		Global Optimal Solution =	3973.01
1	3969.76	99.92	1	0	1		Minimum Optimal Solution =	3902.01		1	3972.35	99.98	1	0	1		Minimum Optimal Solution =	3963.71
2	3973.01	100	1	0	1		Mean of Optimal Solution =	3967.02		2	3972.35	99.98	1	0	1		Mean of Optimal Solution =	3972.28
3	3972.35	99.98	1	0	1		Median of Optimal Solution =	3967.02		3	3972.35	99.98	1	0	1		Median of Optimal Solution =	3972.28
4	3971.06	99.95	1	0	1		Solution Standrad Deviation =	9.5074		4	3973	100	1	0	1		Solution Standrad Deviation =	1.0878
5	3970.09	99.93	1	0	1		Average Price =	28.45		5	3973.01	100	1	0	1		Average Price =	91.815
6	3973	100	1	0	1		Relability =	59		6	3973	100	1	0	1		Relability =	98
7	3971.38	99.96	1	0	1		Normalized Price =	48.2203		7	3971.06	99.95	1	0	1		Normalized Price =	93.6888
8	3971.98	99.97	1	0	1		Average Solution Quality =	99.8493		8	3971.98	99.97	1	0	1		Average Solution Quality =	99.9817
9	3972.03	99.98	1	0	1		Average FDC =	-202.711		9	3972.35	99.98	1	0	1		Average FDC =	-92.3847
10	3972.67	99.99	1	0	1		Correlation Coefficent =	-0.76335		10	3972.03	99.98	1	0	1		Correlation Coefficent =	-0.74294
11	3972.35	99.98	1	0	1		Solution Robustness =	417.258		11	3973	100	1	0	1		Solution Robustness =	3651.59
12	3952.85	99.49	1	0	1		Performance Rate =	0.020738		12	3972.67	99.99	1	0	1		Performance Rate =	0.010674
13	3945.62	99.31	1	0	1		Average Elapsed Time =	1.3661		13	3967.5	99.86	1	0	1		Average Elapsed Time =	4.2854
14	3970.09	99.93	1	0	1					14	3973.01	100	1	0	1
15	3972.5	99.99	1	0	1					15	3973	100	1	0	1
16	3972.67	99.99	1	0	1					16	3973	100	1	0	1
17	3972.35	99.98	1	0	1					17	3971.98	99.97	1	0	1
18	3971.46	99.96	1	0	1					18	3973.01	100	1	0	1
19	3972.5	99.99	1	0	1					19	3972.67	99.99	1	0	1
20	3953.89	99.52	1	0	1					20	3963.71	99.77	1	0	1
21	3959.42	99.66	1	0	1					21	3972.35	99.98	1	0	1
22	3972.35	99.98	1	0	1					22	3972.35	99.98	1	0	1
23	3952.43	99.48	1	0	1					23	3972.67	99.99	1	0	1
24	3961.64	99.71	1	0	1					24	3973.01	100	1	0	1
25	3970.73	99.94	1	0	1					25	3972.5	99.99	1	0	1
26	3973	100	1	0	1					26	3971.46	99.96	1	0	1
27	3972.35	99.98	1	0	1					27	3973.01	100	1	0	1
28	3956.95	99.6	1	0	1					28	3973	100	1	0	1
29	3968.8	99.89	1	0	1					29	3972.5	99.99	1	0	1
30	3967.84	99.87	1	0	1					30	3972.35	99.98	1	0	1
31	3972.67	99.99	1	0	1					31	3972.5	99.99	1	0	1
32	3972.35	99.98	1	0	1					32	3971.06	99.95	1	0	1
33	3972.67	99.99	1	0	1					33	3970.73	99.94	1	0	1
34	3937.77	99.11	1	0	1					34	3972.35	99.98	1	0	1
35	3971.98	99.97	1	0	1					35	3972.35	99.98	1	0	1
36	3970.41	99.93	1	0	1					36	3972.67	99.99	1	0	1
37	3959.1	99.65	1	0	1					37	3972.35	99.98	1	0	1
38	3973	100	1	0	1					38	3971.46	99.96	1	0	1
39	3970.41	99.93	1	0	1					39	3973.01	100	1	0	1
40	3963	99.75	1	0	1					40	3972.67	99.99	1	0	1
41	3966.56	99.84	1	0	1					41	3971.98	99.97	1	0	1
42	3973	100	1	0	1					42	3972.35	99.98	1	0	1
43	3966.53	99.84	1	0	1					43	3968.88	99.9	1	0	1
44	3970.95	99.95	1	0	1					44	3973.01	100	1	0	1
45	3968.47	99.89	1	0	1					45	3972.67	99.99	1	0	1
46	3911.11	98.44	1	0	1					46	3973.01	100	1	0	1
47	3972.67	99.99	1	0	1					47	3972.5	99.99	1	0	1
48	3972.35	99.98	1	0	1					48	3972.35	99.98	1	0	1
49	3958.54	99.64	1	0	1					49	3972.67	99.99	1	0	1
50	3973	100	1	0	1					50	3971.98	99.97	1	0	1
51	3973	100	1	0	1					51	3973.01	100	1	0	1
52	3965.24	99.8	1	0	1					52	3971.06	99.95	1	0	1
53	3962.66	99.74	1	0	1					53	3971.98	99.97	1	0	1
54	3953.37	99.51	1	0	1					54	3972.67	99.99	1	0	1
55	3967.18	99.85	1	0	1					55	3972.35	99.98	1	0	1
56	3972.03	99.98	1	0	1					56	3972.35	99.98	1	0	1
57	3969.76	99.92	1	0	1					57	3973	100	1	0	1
58	3967.67	99.87	1	0	1					58	3971.98	99.97	1	0	1
59	3964.59	99.79	1	0	1					59	3973.01	100	1	0	1
60	3964.74	99.79	1	0	1					60	3972.5	99.99	1	0	1
61	3966.86	99.85	1	0	1					61	3973	100	1	0	1
62	3966.86	99.85	1	0	1					62	3972.67	99.99	1	0	1
63	3965.27	99.81	1	0	1					63	3971.46	99.96	1	0	1
64	3964.22	99.78	1	0	1					64	3969.44	99.91	1	0	1
65	3962.33	99.73	1	0	1					65	3972.67	99.99	1	0	1
66	3972.5	99.99	1	0	1					66	3973.01	100	1	0	1
67	3943.29	99.25	1	0	1					67	3971.98	99.97	1	0	1
68	3972.03	99.98	1	0	1					68	3972.35	99.98	1	0	1
69	3957.48	99.61	1	0	1					69	3965.78	99.82	1	0	1
70	3972.35	99.98	1	0	1					70	3972.35	99.98	1	0	1
71	3972.67	99.99	1	0	1					71	3971.46	99.96	1	0	1
72	3972.5	99.99	1	0	1					72	3973.01	100	1	0	1
73	3972.03	99.98	1	0	1					73	3972.5	99.99	1	0	1
74	3970.41	99.93	1	0	1					74	3971.98	99.97	1	0	1
75	3971.46	99.96	1	0	1					75	3973	100	1	0	1
76	3970.73	99.94	1	0	1					76	3973.01	100	1	0	1
77	3962.98	99.75	1	0	1					77	3973	100	1	0	1
78	3972.67	99.99	1	0	1					78	3973	100	1	0	1
79	3972.35	99.98	1	0	1					79	3972.35	99.98	1	0	1
80	3972.35	99.98	1	0	1					80	3972.67	99.99	1	0	1
81	3973.01	100	1	0	1					81	3972.5	99.99	1	0	1
82	3972.17	99.98	1	0	1					82	3973.01	100	1	0	1
83	3973	100	1	0	1					83	3972.67	99.99	1	0	1
84	3966.88	99.85	1	0	1					84	3972.67	99.99	1	0	1
85	3967.97	99.87	1	0	1					85	3971.46	99.96	1	0	1
86	3970.41	99.93	1	0	1					86	3971.46	99.96	1	0	1
87	3972.35	99.98	1	0	1					87	3973	100	1	0	1
88	3970.41	99.93	1	0	1					88	3972.35	99.98	1	0	1
89	3968.61	99.89	1	0	1					89	3969.12	99.9	1	0	1
90	3944.06	99.27	1	0	1					90	3972.67	99.99	1	0	1
91	3970.09	99.93	1	0	1					91	3973.01	100	1	0	1
92	3965.78	99.82	1	0	1					92	3972.35	99.98	1	0	1
93	3971.46	99.96	1	0	1					93	3973	100	1	0	1
94	3966.03	99.82	1	0	1					94	3972.35	99.98	1	0	1
95	3971.98	99.97	1	0	1					95	3970.73	99.94	1	0	1
96	3973	100	1	0	1					96	3972.35	99.98	1	0	1
97	3971.98	99.97	1	0	1					97	3973	100	1	0	1
98	3965.26	99.8	1	0	1					98	3972.67	99.99	1	0	1
99	3970.73	99.94	1	0	1					99	3972.35	99.98	1	0	1
100	3972.67	99.99	1	0	1					100	3973	100	1	0	1
101	3970.73	99.94	1	0	1					101	3971.98	99.97	1	0	1
102	3972.03	99.98	1	0	1					102	3972.35	99.98	1	0	1
103	3970.41	99.93	1	0	1					103	3973	100	1	0	1
104	3963.71	99.77	1	0	1					104	3973	100	1	0	1
105	3962.16	99.73	1	0	1					105	3969.44	99.91	1	0	1
106	3972.67	99.99	1	0	1					106	3972.5	99.99	1	0	1
107	3972.35	99.98	1	0	1					107	3971.98	99.97	1	0	1
108	3969.14	99.9	1	0	1					108	3972.67	99.99	1	0	1
109	3962.16	99.73	1	0	1					109	3971.46	99.96	1	0	1
110	3969.76	99.92	1	0	1					110	3972.35	99.98	1	0	1
111	3972.5	99.99	1	0	1					111	3973	100	1	0	1
112	3973	100	1	0	1					112	3973.01	100	1	0	1
113	3965.26	99.8	1	0	1					113	3972.67	99.99	1	0	1
114	3972.35	99.98	1	0	1					114	3973.01	100	1	0	1
115	3972.35	99.98	1	0	1					115	3972.67	99.99	1	0	1
116	3971.46	99.96	1	0	1					116	3972.67	99.99	1	0	1
117	3973	100	1	0	1					117	3972.03	99.98	1	0	1
118	3969.76	99.92	1	0	1					118	3972.35	99.98	1	0	1
119	3973.01	100	1	0	1					119	3972.5	99.99	1	0	1
120	3972.35	99.98	1	0	1					120	3972.35	99.98	1	0	1
121	3973	100	1	0	1					121	3972.67	99.99	1	0	1
122	3972.03	99.98	1	0	1					122	3972.5	99.99	1	0	1
123	3973	100	1	0	1					123	3971.46	99.96	1	0	1
124	3944.58	99.28	1	0	1					124	3973	100	1	0	1
125	3972.67	99.99	1	0	1					125	3971.98	99.97	1	0	1
126	3973	100	1	0	1					126	3972.5	99.99	1	0	1
127	3962.59	99.74	1	0	1					127	3971.46	99.96	1	0	1
128	3952.33	99.48	1	0	1					128	3972.35	99.98	1	0	1
129	3964.92	99.8	1	0	1					129	3971.98	99.97	1	0	1
130	3967.84	99.87	1	0	1					130	3972.5	99.99	1	0	1
131	3949.23	99.4	1	0	1					131	3973.01	100	1	0	1
132	3972.35	99.98	1	0	1					132	3973.01	100	1	0	1
133	3972.67	99.99	1	0	1					133	3973	100	1	0	1
134	3971.46	99.96	1	0	1					134	3972.67	99.99	1	0	1
135	3960.51	99.69	1	0	1					135	3972.35	99.98	1	0	1
136	3971.46	99.96	1	0	1					136	3973.01	100	1	0	1
137	3964.22	99.78	1	0	1					137	3972.5	99.99	1	0	1
138	3964.59	99.79	1	0	1					138	3971.98	99.97	1	0	1
139	3968.36	99.88	1	0	1					139	3973	100	1	0	1
140	3972.03	99.98	1	0	1					140	3972.35	99.98	1	0	1
141	3947.14	99.35	1	0	1					141	3972.67	99.99	1	0	1
142	3972.67	99.99	1	0	1					142	3973	100	1	0	1
143	3968.82	99.89	1	0	1					143	3973	100	1	0	1
144	3972.03	99.98	1	0	1					144	3973	100	1	0	1
145	3939.66	99.16	1	0	1					145	3972.5	99.99	1	0	1
146	3972.35	99.98	1	0	1					146	3972.67	99.99	1	0	1
147	3967.85	99.87	1	0	1					147	3971.98	99.97	1	0	1
148	3968.88	99.9	1	0	1					148	3972.35	99.98	1	0	1
149	3972.67	99.99	1	0	1					149	3971.46	99.96	1	0	1
150	3972.67	99.99	1	0	1					150	3971.98	99.97	1	0	1
151	3973	100	1	0	1					151	3971.98	99.97	1	0	1
152	3972.35	99.98	1	0	1					152	3971.98	99.97	1	0	1
153	3964.22	99.78	1	0	1					153	3972.67	99.99	1	0	1
154	3946.13	99.32	1	0	1					154	3972.5	99.99	1	0	1
155	3959.57	99.66	1	0	1					155	3972.67	99.99	1	0	1
156	3963.3	99.76	1	0	1					156	3972.5	99.99	1	0	1
157	3968.15	99.88	1	0	1					157	3972.67	99.99	1	0	1
158	3968.8	99.89	1	0	1					158	3972.67	99.99	1	0	1
159	3971.46	99.96	1	0	1					159	3972.35	99.98	1	0	1
160	3971.06	99.95	1	0	1					160	3972.5	99.99	1	0	1
161	3951.99	99.47	1	0	1					161	3972.35	99.98	1	0	1
162	3972.03	99.98	1	0	1					162	3971.98	99.97	1	0	1
163	3972.35	99.98	1	0	1					163	3972.67	99.99	1	0	1
164	3970.95	99.95	1	0	1					164	3972.35	99.98	1	0	1
165	3961.04	99.7	1	0	1					165	3972.35	99.98	1	0	1
166	3973	100	1	0	1					166	3972.67	99.99	1	0	1
167	3971.46	99.96	1	0	1					167	3971.98	99.97	1	0	1
168	3971.38	99.96	1	0	1					168	3973	100	1	0	1
169	3964.27	99.78	1	0	1					169	3972.67	99.99	1	0	1
170	3963.19	99.75	1	0	1					170	3972.35	99.98	1	0	1
171	3972.03	99.98	1	0	1					171	3972.35	99.98	1	0	1
172	3972.03	99.98	1	0	1					172	3972.5	99.99	1	0	1
173	3972.67	99.99	1	0	1					173	3972.35	99.98	1	0	1
174	3968.88	99.9	1	0	1					174	3972.67	99.99	1	0	1
175	3964.59	99.79	1	0	1					175	3973.01	100	1	0	1
176	3971.98	99.97	1	0	1					176	3973	100	1	0	1
177	3972.67	99.99	1	0	1					177	3972.5	99.99	1	0	1
178	3972.67	99.99	1	0	1					178	3972.35	99.98	1	0	1
179	3939.93	99.17	1	0	1					179	3973.01	100	1	0	1
180	3968.36	99.88	1	0	1					180	3970.73	99.94	1	0	1
181	3971.06	99.95	1	0	1					181	3972.35	99.98	1	0	1
182	3968.36	99.88	1	0	1					182	3973.01	100	1	0	1
183	3972.03	99.98	1	0	1					183	3973	100	1	0	1
184	3968.36	99.88	1	0	1					184	3972.67	99.99	1	0	1
185	3970.95	99.95	1	0	1					185	3972.35	99.98	1	0	1
186	3968.88	99.9	1	0	1					186	3972.67	99.99	1	0	1
187	3970.43	99.94	1	0	1					187	3971.46	99.96	1	0	1
188	3972.03	99.98	1	0	1					188	3971.98	99.97	1	0	1
189	3964.22	99.78	1	0	1					189	3972.67	99.99	1	0	1
190	3962.16	99.73	1	0	1					190	3972.35	99.98	1	0	1
191	3968.88	99.9	1	0	1					191	3971.06	99.95	1	0	1
192	3964.22	99.78	1	0	1					192	3973	100	1	0	1
193	3902.01	98.21	1	0	1					193	3973	100	1	0	1
194	3970.73	99.94	1	0	1					194	3972.35	99.98	1	0	1
195	3966.81	99.84	1	0	1					195	3972.35	99.98	1	0	1
196	3972.5	99.99	1	0	1					196	3972.35	99.98	1	0	1
197	3958.54	99.64	1	0	1					197	3970.73	99.94	1	0	1
198	3972.03	99.98	1	0	1					198	3972.67	99.99	1	0	1
199	3969.58	99.91	1	0	1					199	3973	100	1	0	1
200	3970.73	99.94	1	0	1					200	3971.98	99.97	1	0	1

## Sheet: 07_EHCFMMACO_Seeds(167)
Fast Converegnce Exp							Fast Converegnce Exp			Slow Converegnce Exp							Slow Converegnce Exp
#	CBLF	Quality	Taumax	Taumin	DeltaTauminmax		Global Optimal Solution =	3973.01		#	CBLF	Quality	Taumax	Taumin	DeltaTauminmax		Global Optimal Solution =	3973.01
1	3972.35	99.98	1	0	1		Minimum Optimal Solution =	3888.43		1	3972.35	99.98	1	0	1		Minimum Optimal Solution =	3967.5
2	3962.16	99.73	1	0	1		Mean of Optimal Solution =	3966.99		2	3972.5	99.99	1	0	1		Mean of Optimal Solution =	3972.29
3	3973.01	100	1	0	1		Median of Optimal Solution=	3966.99		3	3972.35	99.98	1	0	1		Median of Optimal Solution =	3972.29
4	3958.54	99.64	1	0	1		Solution Standrad Deviation =	10.76		4	3971.46	99.96	1	0	1		Solution Standrad Deviation =	0.82718
5	3970.41	99.93	1	0	1		Average Price =	28.61		5	3972.35	99.98	1	0	1		Average Price =	94.175
6	3972.67	99.99	1	0	1		Relability =	62		6	3972.67	99.99	1	0	1		Relability =	99
7	3970.09	99.93	1	0	1		Normalized Price =	46.1452		7	3972.67	99.99	1	0	1		Normalized Price =	95.1263
8	3970.95	99.95	1	0	1		Average Solution Quality =	99.8484		8	3972.67	99.99	1	0	1		Average Solution Quality =	99.9819
9	3972.35	99.98	1	0	1		Average FDC =	-201.013		9	3973.01	100	1	0	1		Average FDC =	-89.0415
10	3968.47	99.89	1	0	1		Correlation Coefficent =	-0.78091		10	3972.5	99.99	1	0	1		Correlation Coefficent =	-0.74958
11	3973	100	1	0	1		Solution Robustness =	368.678		11	3970.73	99.94	1	0	1		Solution Robustness =	4802.22
12	3972.67	99.99	1	0	1		Performance Rate =	0.021671		12	3972.67	99.99	1	0	1		Performance Rate =	0.010512
13	3968.88	99.9	1	0	1		Average Elapsed Time =	1.3784		13	3972.35	99.98	1	0	1		Average Elapsed Time =	4.5029
14	3972.03	99.98	1	0	1					14	3972.67	99.99	1	0	1
15	3964.92	99.8	1	0	1					15	3973.01	100	1	0	1
16	3972.67	99.99	1	0	1					16	3971.46	99.96	1	0	1
17	3973.01	100	1	0	1					17	3972.67	99.99	1	0	1
18	3972.03	99.98	1	0	1					18	3972.5	99.99	1	0	1
19	3967.2	99.85	1	0	1					19	3972.67	99.99	1	0	1
20	3972.5	99.99	1	0	1					20	3972.67	99.99	1	0	1
21	3941.99	99.22	1	0	1					21	3972.67	99.99	1	0	1
22	3965.27	99.81	1	0	1					22	3971.98	99.97	1	0	1
23	3968.88	99.9	1	0	1					23	3972.67	99.99	1	0	1
24	3964.59	99.79	1	0	1					24	3972.35	99.98	1	0	1
25	3973.01	100	1	0	1					25	3972.35	99.98	1	0	1
26	3972.5	99.99	1	0	1					26	3970.73	99.94	1	0	1
27	3964.3	99.78	1	0	1					27	3972.67	99.99	1	0	1
28	3967.18	99.85	1	0	1					28	3972.5	99.99	1	0	1
29	3958.57	99.64	1	0	1					29	3972.67	99.99	1	0	1
30	3971.98	99.97	1	0	1					30	3972.35	99.98	1	0	1
31	3970.73	99.94	1	0	1					31	3971.06	99.95	1	0	1
32	3972.03	99.98	1	0	1					32	3972.67	99.99	1	0	1
33	3962.77	99.74	1	0	1					33	3971.98	99.97	1	0	1
34	3973	100	1	0	1					34	3972.67	99.99	1	0	1
35	3972.35	99.98	1	0	1					35	3972.03	99.98	1	0	1
36	3971.98	99.97	1	0	1					36	3971.06	99.95	1	0	1
37	3970.09	99.93	1	0	1					37	3971.98	99.97	1	0	1
38	3971.46	99.96	1	0	1					38	3970.41	99.93	1	0	1
39	3971.98	99.97	1	0	1					39	3971.46	99.96	1	0	1
40	3958.02	99.62	1	0	1					40	3973.01	100	1	0	1
41	3970.95	99.95	1	0	1					41	3971.46	99.96	1	0	1
42	3970.09	99.93	1	0	1					42	3972.67	99.99	1	0	1
43	3965.26	99.8	1	0	1					43	3972.35	99.98	1	0	1
44	3966.86	99.85	1	0	1					44	3971.98	99.97	1	0	1
45	3967.2	99.85	1	0	1					45	3972.67	99.99	1	0	1
46	3972.35	99.98	1	0	1					46	3972.67	99.99	1	0	1
47	3965.26	99.8	1	0	1					47	3972.5	99.99	1	0	1
48	3972.67	99.99	1	0	1					48	3972.35	99.98	1	0	1
49	3972.67	99.99	1	0	1					49	3972.67	99.99	1	0	1
50	3971.98	99.97	1	0	1					50	3973.01	100	1	0	1
51	3970.41	99.93	1	0	1					51	3971.98	99.97	1	0	1
52	3967.18	99.85	1	0	1					52	3973.01	100	1	0	1
53	3972.67	99.99	1	0	1					53	3972.5	99.99	1	0	1
54	3953.37	99.51	1	0	1					54	3973	100	1	0	1
55	3970.73	99.94	1	0	1					55	3972.03	99.98	1	0	1
56	3958.25	99.63	1	0	1					56	3973	100	1	0	1
57	3968.8	99.89	1	0	1					57	3972.35	99.98	1	0	1
58	3973.01	100	1	0	1					58	3971.06	99.95	1	0	1
59	3972.35	99.98	1	0	1					59	3972.5	99.99	1	0	1
60	3970.73	99.94	1	0	1					60	3972.67	99.99	1	0	1
61	3967.64	99.86	1	0	1					61	3972.67	99.99	1	0	1
62	3972.03	99.98	1	0	1					62	3972.35	99.98	1	0	1
63	3964.22	99.78	1	0	1					63	3973.01	100	1	0	1
64	3972.03	99.98	1	0	1					64	3972.35	99.98	1	0	1
65	3966.29	99.83	1	0	1					65	3971.46	99.96	1	0	1
66	3951.25	99.45	1	0	1					66	3973	100	1	0	1
67	3972.03	99.98	1	0	1					67	3971.46	99.96	1	0	1
68	3970.43	99.94	1	0	1					68	3972.67	99.99	1	0	1
69	3972.35	99.98	1	0	1					69	3971.98	99.97	1	0	1
70	3960.51	99.69	1	0	1					70	3971.98	99.97	1	0	1
71	3972.35	99.98	1	0	1					71	3972.5	99.99	1	0	1
72	3971.7	99.97	1	0	1					72	3972.5	99.99	1	0	1
73	3970.09	99.93	1	0	1					73	3972.5	99.99	1	0	1
74	3947.16	99.35	1	0	1					74	3967.5	99.86	1	0	1
75	3971.06	99.95	1	0	1					75	3972.67	99.99	1	0	1
76	3963.3	99.76	1	0	1					76	3973	100	1	0	1
77	3973.01	100	1	0	1					77	3972.5	99.99	1	0	1
78	3973.01	100	1	0	1					78	3972.5	99.99	1	0	1
79	3968.36	99.88	1	0	1					79	3972.67	99.99	1	0	1
80	3972.35	99.98	1	0	1					80	3972.35	99.98	1	0	1
81	3970.95	99.95	1	0	1					81	3973	100	1	0	1
82	3958.02	99.62	1	0	1					82	3972.35	99.98	1	0	1
83	3972.03	99.98	1	0	1					83	3972.67	99.99	1	0	1
84	3971.46	99.96	1	0	1					84	3973.01	100	1	0	1
85	3972.67	99.99	1	0	1					85	3972.67	99.99	1	0	1
86	3965.78	99.82	1	0	1					86	3972.67	99.99	1	0	1
87	3926.47	98.83	1	0	1					87	3972.67	99.99	1	0	1
88	3973	100	1	0	1					88	3972.03	99.98	1	0	1
89	3908.64	98.38	1	0	1					89	3972.67	99.99	1	0	1
90	3917.7	98.61	1	0	1					90	3972.35	99.98	1	0	1
91	3972.67	99.99	1	0	1					91	3973	100	1	0	1
92	3947.58	99.36	1	0	1					92	3971.98	99.97	1	0	1
93	3972.03	99.98	1	0	1					93	3972.67	99.99	1	0	1
94	3961.39	99.71	1	0	1					94	3972.67	99.99	1	0	1
95	3967.18	99.85	1	0	1					95	3973.01	100	1	0	1
96	3970.73	99.94	1	0	1					96	3971.98	99.97	1	0	1
97	3972.67	99.99	1	0	1					97	3972.67	99.99	1	0	1
98	3973	100	1	0	1					98	3973	100	1	0	1
99	3963.79	99.77	1	0	1					99	3972.03	99.98	1	0	1
100	3972.35	99.98	1	0	1					100	3972.5	99.99	1	0	1
101	3961.07	99.7	1	0	1					101	3973	100	1	0	1
102	3888.43	97.87	1	0	1					102	3972.35	99.98	1	0	1
103	3971.46	99.96	1	0	1					103	3972.5	99.99	1	0	1
104	3973.01	100	1	0	1					104	3971.98	99.97	1	0	1
105	3973	100	1	0	1					105	3972.67	99.99	1	0	1
106	3943.18	99.25	1	0	1					106	3971.46	99.96	1	0	1
107	3972.67	99.99	1	0	1					107	3971.46	99.96	1	0	1
108	3963.09	99.75	1	0	1					108	3971.98	99.97	1	0	1
109	3972.35	99.98	1	0	1					109	3972.67	99.99	1	0	1
110	3945.61	99.31	1	0	1					110	3972.67	99.99	1	0	1
111	3969.76	99.92	1	0	1					111	3969.12	99.9	1	0	1
112	3972.35	99.98	1	0	1					112	3972.67	99.99	1	0	1
113	3972.67	99.99	1	0	1					113	3971.98	99.97	1	0	1
114	3973	100	1	0	1					114	3972.67	99.99	1	0	1
115	3968.15	99.88	1	0	1					115	3973	100	1	0	1
116	3961.68	99.71	1	0	1					116	3972.67	99.99	1	0	1
117	3967.18	99.85	1	0	1					117	3973.01	100	1	0	1
118	3973	100	1	0	1					118	3972.67	99.99	1	0	1
119	3970.41	99.93	1	0	1					119	3972.67	99.99	1	0	1
120	3972.17	99.98	1	0	1					120	3972.67	99.99	1	0	1
121	3973	100	1	0	1					121	3973.01	100	1	0	1
122	3972.35	99.98	1	0	1					122	3973	100	1	0	1
123	3971.98	99.97	1	0	1					123	3972.67	99.99	1	0	1
124	3971.98	99.97	1	0	1					124	3971.06	99.95	1	0	1
125	3970.43	99.94	1	0	1					125	3969.12	99.9	1	0	1
126	3972.5	99.99	1	0	1					126	3971.98	99.97	1	0	1
127	3968.36	99.88	1	0	1					127	3972.5	99.99	1	0	1
128	3968.47	99.89	1	0	1					128	3972.35	99.98	1	0	1
129	3968.47	99.89	1	0	1					129	3972.67	99.99	1	0	1
130	3971.98	99.97	1	0	1					130	3972.35	99.98	1	0	1
131	3967.84	99.87	1	0	1					131	3973	100	1	0	1
132	3962.45	99.73	1	0	1					132	3968.88	99.9	1	0	1
133	3966.56	99.84	1	0	1					133	3972.67	99.99	1	0	1
134	3968.15	99.88	1	0	1					134	3972.35	99.98	1	0	1
135	3970.41	99.93	1	0	1					135	3972.67	99.99	1	0	1
136	3971.46	99.96	1	0	1					136	3973	100	1	0	1
137	3952.43	99.48	1	0	1					137	3972.67	99.99	1	0	1
138	3970.43	99.94	1	0	1					138	3971.06	99.95	1	0	1
139	3972.03	99.98	1	0	1					139	3971.98	99.97	1	0	1
140	3971.98	99.97	1	0	1					140	3973	100	1	0	1
141	3971.98	99.97	1	0	1					141	3971.06	99.95	1	0	1
142	3971.98	99.97	1	0	1					142	3973	100	1	0	1
143	3965.26	99.8	1	0	1					143	3972.35	99.98	1	0	1
144	3966.53	99.84	1	0	1					144	3972.35	99.98	1	0	1
145	3966.86	99.85	1	0	1					145	3972.67	99.99	1	0	1
146	3973	100	1	0	1					146	3973.01	100	1	0	1
147	3967.84	99.87	1	0	1					147	3973	100	1	0	1
148	3969.12	99.9	1	0	1					148	3970.41	99.93	1	0	1
149	3972.35	99.98	1	0	1					149	3973	100	1	0	1
150	3973	100	1	0	1					150	3973	100	1	0	1
151	3972.35	99.98	1	0	1					151	3970.73	99.94	1	0	1
152	3939.34	99.15	1	0	1					152	3971.06	99.95	1	0	1
153	3966.53	99.84	1	0	1					153	3973.01	100	1	0	1
154	3949.41	99.41	1	0	1					154	3973	100	1	0	1
155	3969.39	99.91	1	0	1					155	3972.5	99.99	1	0	1
156	3972.17	99.98	1	0	1					156	3973	100	1	0	1
157	3972.67	99.99	1	0	1					157	3969.39	99.91	1	0	1
158	3972.67	99.99	1	0	1					158	3972.67	99.99	1	0	1
159	3967.85	99.87	1	0	1					159	3972.35	99.98	1	0	1
160	3971.85	99.97	1	0	1					160	3972.67	99.99	1	0	1
161	3972.03	99.98	1	0	1					161	3971.06	99.95	1	0	1
162	3970.43	99.94	1	0	1					162	3971.06	99.95	1	0	1
163	3970.09	99.93	1	0	1					163	3973	100	1	0	1
164	3970.09	99.93	1	0	1					164	3972.67	99.99	1	0	1
165	3949.82	99.42	1	0	1					165	3973	100	1	0	1
166	3971.06	99.95	1	0	1					166	3972.35	99.98	1	0	1
167	3970.09	99.93	1	0	1					167	3972.35	99.98	1	0	1
168	3946.85	99.34	1	0	1					168	3971.98	99.97	1	0	1
169	3943.55	99.26	1	0	1					169	3971.98	99.97	1	0	1
170	3967.84	99.87	1	0	1					170	3972.03	99.98	1	0	1
171	3968.88	99.9	1	0	1					171	3973	100	1	0	1
172	3968.88	99.9	1	0	1					172	3973	100	1	0	1
173	3970.09	99.93	1	0	1					173	3972.35	99.98	1	0	1
174	3970.09	99.93	1	0	1					174	3969.39	99.91	1	0	1
175	3967.84	99.87	1	0	1					175	3972.35	99.98	1	0	1
176	3972.35	99.98	1	0	1					176	3972.5	99.99	1	0	1
177	3971.98	99.97	1	0	1					177	3971.98	99.97	1	0	1
178	3972.67	99.99	1	0	1					178	3972.5	99.99	1	0	1
179	3972.03	99.98	1	0	1					179	3972.67	99.99	1	0	1
180	3972.35	99.98	1	0	1					180	3972.5	99.99	1	0	1
181	3972.67	99.99	1	0	1					181	3972.35	99.98	1	0	1
182	3972.35	99.98	1	0	1					182	3973	100	1	0	1
183	3972.67	99.99	1	0	1					183	3972.67	99.99	1	0	1
184	3958.25	99.63	1	0	1					184	3972.67	99.99	1	0	1
185	3961.64	99.71	1	0	1					185	3971.98	99.97	1	0	1
186	3972.67	99.99	1	0	1					186	3972.67	99.99	1	0	1
187	3964.41	99.78	1	0	1					187	3972.67	99.99	1	0	1
188	3971.06	99.95	1	0	1					188	3973	100	1	0	1
189	3973.01	100	1	0	1					189	3972.35	99.98	1	0	1
190	3972.5	99.99	1	0	1					190	3972.35	99.98	1	0	1
191	3970.95	99.95	1	0	1					191	3971.98	99.97	1	0	1
192	3971.06	99.95	1	0	1					192	3972.67	99.99	1	0	1
193	3971.98	99.97	1	0	1					193	3971.98	99.97	1	0	1
194	3955.95	99.57	1	0	1					194	3971.98	99.97	1	0	1
195	3972.03	99.98	1	0	1					195	3972.03	99.98	1	0	1
196	3971.98	99.97	1	0	1					196	3972.67	99.99	1	0	1
197	3962.77	99.74	1	0	1					197	3972.67	99.99	1	0	1
198	3972.35	99.98	1	0	1					198	3973.01	100	1	0	1
199	3971.52	99.96	1	0	1					199	3972.67	99.99	1	0	1
200	3970.43	99.94	1	0						200	3971.98	99.97	1	0	1

## Sheet: 08_EHCFMMACO_Seeds(225)
Fast Converegnce Exp							Fast Converegnce Exp			Slow Converegnce Exp							Slow Converegnce Exp
#	CBLF	Quality	Taumax	Taumin	DeltaTauminmax		Global Optimal Solution =	3973.01		#	CBLF	Quality	Taumax	Taumin	DeltaTauminmax		Global Optimal Solution =	3973.01
1	3971.98	99.97	1	0	1		Minimum Optimal Solution =	3883.57		1	3972.03	99.98	1	0	1		Minimum Optimal Solution =	3966.29
2	3972.35	99.98	1	0	1		Mean of Optimal Solution =	3966.01		2	3972.03	99.98	1	0	1		Mean of Optimal Solution =	3972.18
3	3970.09	99.93	1	0	1		Median of Optimal Solution=	3966.01		3	3969.44	99.91	1	0	1		Median of Optimal Solution =	3972.18
4	3972.35	99.98	1	0	1		Solution Standrad Deviation =	12.5412		4	3972.67	99.99	1	0	1		Solution Standrad Deviation =	1.0158
5	3968.36	99.88	1	0	1		Average Price =	27.46		5	3971.46	99.96	1	0	1		Average Price =	92.975
6	3973.01	100	1	0	1		Relability =	65.5		6	3971.98	99.97	1	0	1		Relability =	97.5
7	3972.5	99.99	1	0	1		Normalized Price =	41.9237		7	3971.98	99.97	1	0	1		Normalized Price =	95.359
8	3970.95	99.95	1	0	1		Average Solution Quality =	99.8238		8	3973	100	1	0	1		Average Solution Quality =	99.9791
9	3971.98	99.97	1	0	1		Average FDC =	-198.964		9	3972.67	99.99	1	0	1		Average FDC =	-97.6723
10	3957.42	99.61	1	0	1		Correlation Coefficent =	-0.775		10	3971.98	99.97	1	0	1		Correlation Coefficent =	-0.75291
11	3960.24	99.68	1	0	1		Solution Robustness =	316.237		11	3972.67	99.99	1	0	1		Solution Robustness =	3910.42
12	3969.39	99.91	1	0	1		Performance Rate =	0.023853		12	3972.35	99.98	1	0	1		Performance Rate =	0.010487
13	3971.7	99.97	1	0	1		Average Elapsed Time =	1.3207		13	3972.67	99.99	1	0	1		Average Elapsed Time =	4.5038
14	3972.03	99.98	1	0	1					14	3972.03	99.98	1	0	1
15	3972.35	99.98	1	0	1					15	3973.01	100	1	0	1
16	3971.98	99.97	1	0	1					16	3973	100	1	0	1
17	3970.95	99.95	1	0	1					17	3972.67	99.99	1	0	1
18	3971.98	99.97	1	0	1					18	3973	100	1	0	1
19	3971.98	99.97	1	0	1					19	3973	100	1	0	1
20	3952.99	99.5	1	0	1					20	3972.67	99.99	1	0	1
21	3972.67	99.99	1	0	1					21	3972.35	99.98	1	0	1
22	3971.98	99.97	1	0	1					22	3972.67	99.99	1	0	1
23	3972.35	99.98	1	0	1					23	3971.06	99.95	1	0	1
24	3972.5	99.99	1	0	1					24	3972.67	99.99	1	0	1
25	3934.17	99.02	1	0	1					25	3973	100	1	0	1
26	3971.46	99.96	1	0	1					26	3973	100	1	0	1
27	3973	100	1	0	1					27	3972.67	99.99	1	0	1
28	3968.36	99.88	1	0	1					28	3973	100	1	0	1
29	3972.67	99.99	1	0	1					29	3972.5	99.99	1	0	1
30	3972.35	99.98	1	0	1					30	3972.5	99.99	1	0	1
31	3972.5	99.99	1	0	1					31	3972.67	99.99	1	0	1
32	3955.22	99.55	1	0	1					32	3971.46	99.96	1	0	1
33	3962.01	99.72	1	0	1					33	3971.98	99.97	1	0	1
34	3972.03	99.98	1	0	1					34	3972.5	99.99	1	0	1
35	3969.39	99.91	1	0	1					35	3972.35	99.98	1	0	1
36	3960.61	99.69	1	0	1					36	3972.03	99.98	1	0	1
37	3954.9	99.54	1	0	1					37	3970.09	99.93	1	0	1
38	3972.35	99.98	1	0	1					38	3972.35	99.98	1	0	1
39	3953.4	99.51	1	0	1					39	3970.73	99.94	1	0	1
40	3968.88	99.9	1	0	1					40	3971.98	99.97	1	0	1
41	3968.88	99.9	1	0	1					41	3971.98	99.97	1	0	1
42	3913.05	98.49	1	0	1					42	3971.98	99.97	1	0	1
43	3972.35	99.98	1	0	1					43	3972.67	99.99	1	0	1
44	3969.12	99.9	1	0	1					44	3973.01	100	1	0	1
45	3951.02	99.45	1	0	1					45	3969.44	99.91	1	0	1
46	3967.18	99.85	1	0	1					46	3972.67	99.99	1	0	1
47	3962.77	99.74	1	0	1					47	3972.5	99.99	1	0	1
48	3970.95	99.95	1	0	1					48	3972.5	99.99	1	0	1
49	3943.03	99.25	1	0	1					49	3972.67	99.99	1	0	1
50	3970.95	99.95	1	0	1					50	3971.46	99.96	1	0	1
51	3971.85	99.97	1	0	1					51	3972.67	99.99	1	0	1
52	3939.34	99.15	1	0	1					52	3972.35	99.98	1	0	1
53	3969.76	99.92	1	0	1					53	3971.98	99.97	1	0	1
54	3963.71	99.77	1	0	1					54	3972.35	99.98	1	0	1
55	3920.48	98.68	1	0	1					55	3972.03	99.98	1	0	1
56	3970.41	99.93	1	0	1					56	3972.35	99.98	1	0	1
57	3968.82	99.89	1	0	1					57	3972.67	99.99	1	0	1
58	3971.06	99.95	1	0	1					58	3972.35	99.98	1	0	1
59	3971.46	99.96	1	0	1					59	3972.67	99.99	1	0	1
60	3943.03	99.25	1	0	1					60	3973	100	1	0	1
61	3973	100	1	0	1					61	3973	100	1	0	1
62	3972.03	99.98	1	0	1					62	3972.67	99.99	1	0	1
63	3972.35	99.98	1	0	1					63	3972.03	99.98	1	0	1
64	3970.09	99.93	1	0	1					64	3971.06	99.95	1	0	1
65	3971.46	99.96	1	0	1					65	3973	100	1	0	1
66	3971.98	99.97	1	0	1					66	3971.46	99.96	1	0	1
67	3973.01	100	1	0	1					67	3972.67	99.99	1	0	1
68	3968.36	99.88	1	0	1					68	3971.98	99.97	1	0	1
69	3972.5	99.99	1	0	1					69	3972.67	99.99	1	0	1
70	3972.67	99.99	1	0	1					70	3973	100	1	0	1
71	3971.06	99.95	1	0	1					71	3973	100	1	0	1
72	3973.01	100	1	0	1					72	3972.03	99.98	1	0	1
73	3963	99.75	1	0	1					73	3973.01	100	1	0	1
74	3970.09	99.93	1	0	1					74	3972.67	99.99	1	0	1
75	3972.67	99.99	1	0	1					75	3973	100	1	0	1
76	3972.67	99.99	1	0	1					76	3972.5	99.99	1	0	1
77	3960.39	99.68	1	0	1					77	3972.35	99.98	1	0	1
78	3973.01	100	1	0	1					78	3972.67	99.99	1	0	1
79	3971.46	99.96	1	0	1					79	3972.5	99.99	1	0	1
80	3972.67	99.99	1	0	1					80	3972.67	99.99	1	0	1
81	3969.39	99.91	1	0	1					81	3972.5	99.99	1	0	1
82	3970.73	99.94	1	0	1					82	3970.41	99.93	1	0	1
83	3970.09	99.93	1	0	1					83	3972.35	99.98	1	0	1
84	3971.98	99.97	1	0	1					84	3972.35	99.98	1	0	1
85	3972.67	99.99	1	0	1					85	3969.39	99.91	1	0	1
86	3971.06	99.95	1	0	1					86	3972.67	99.99	1	0	1
87	3973	100	1	0	1					87	3972.5	99.99	1	0	1
88	3964.62	99.79	1	0	1					88	3972.67	99.99	1	0	1
89	3972.67	99.99	1	0	1					89	3972.5	99.99	1	0	1
90	3949.08	99.4	1	0	1					90	3972.67	99.99	1	0	1
91	3970.73	99.94	1	0	1					91	3972.67	99.99	1	0	1
92	3970.09	99.93	1	0	1					92	3971.98	99.97	1	0	1
93	3970.95	99.95	1	0	1					93	3972.67	99.99	1	0	1
94	3937.54	99.11	1	0	1					94	3972.03	99.98	1	0	1
95	3972.5	99.99	1	0	1					95	3971.98	99.97	1	0	1
96	3970.41	99.93	1	0	1					96	3970.09	99.93	1	0	1
97	3962.98	99.75	1	0	1					97	3970.41	99.93	1	0	1
98	3965.78	99.82	1	0	1					98	3969.39	99.91	1	0	1
99	3972.67	99.99	1	0	1					99	3972.67	99.99	1	0	1
100	3939.93	99.17	1	0	1					100	3972.5	99.99	1	0	1
101	3970.41	99.93	1	0	1					101	3972.67	99.99	1	0	1
102	3968.15	99.88	1	0	1					102	3969.12	99.9	1	0	1
103	3970.73	99.94	1	0	1					103	3973.01	100	1	0	1
104	3972.35	99.98	1	0	1					104	3972.67	99.99	1	0	1
105	3970.73	99.94	1	0	1					105	3972.67	99.99	1	0	1
106	3972.35	99.98	1	0	1					106	3973.01	100	1	0	1
107	3973	100	1	0	1					107	3973.01	100	1	0	1
108	3970.95	99.95	1	0	1					108	3970.73	99.94	1	0	1
109	3969.26	99.91	1	0	1					109	3972.67	99.99	1	0	1
110	3963.19	99.75	1	0	1					110	3970.41	99.93	1	0	1
111	3972.5	99.99	1	0	1					111	3971.06	99.95	1	0	1
112	3970.41	99.93	1	0	1					112	3972.5	99.99	1	0	1
113	3971.98	99.97	1	0	1					113	3973	100	1	0	1
114	3970.73	99.94	1	0	1					114	3972.5	99.99	1	0	1
115	3973	100	1	0	1					115	3972.35	99.98	1	0	1
116	3962.16	99.73	1	0	1					116	3972.67	99.99	1	0	1
117	3972.35	99.98	1	0	1					117	3973	100	1	0	1
118	3972.67	99.99	1	0	1					118	3972.67	99.99	1	0	1
119	3964.92	99.8	1	0	1					119	3968.88	99.9	1	0	1
120	3972.67	99.99	1	0	1					120	3968.8	99.89	1	0	1
121	3972.67	99.99	1	0	1					121	3972.35	99.98	1	0	1
122	3971.98	99.97	1	0	1					122	3972.67	99.99	1	0	1
123	3973.01	100	1	0	1					123	3973	100	1	0	1
124	3969.91	99.92	1	0	1					124	3969.12	99.9	1	0	1
125	3972.35	99.98	1	0	1					125	3971.98	99.97	1	0	1
126	3973.01	100	1	0	1					126	3972.03	99.98	1	0	1
127	3967.33	99.86	1	0	1					127	3972.35	99.98	1	0	1
128	3972.5	99.99	1	0	1					128	3972.35	99.98	1	0	1
129	3920.98	98.69	1	0	1					129	3968.88	99.9	1	0	1
130	3972.35	99.98	1	0	1					130	3971.98	99.97	1	0	1
131	3970.43	99.94	1	0	1					131	3973	100	1	0	1
132	3973	100	1	0	1					132	3968.88	99.9	1	0	1
133	3936.07	99.07	1	0	1					133	3972.67	99.99	1	0	1
134	3971.2	99.95	1	0	1					134	3972.35	99.98	1	0	1
135	3968.88	99.9	1	0	1					135	3973	100	1	0	1
136	3927	98.84	1	0	1					136	3973	100	1	0	1
137	3968.8	99.89	1	0	1					137	3971.98	99.97	1	0	1
138	3961.36	99.71	1	0	1					138	3973.01	100	1	0	1
139	3951.82	99.47	1	0	1					139	3966.29	99.83	1	0	1
140	3973	100	1	0	1					140	3973	100	1	0	1
141	3972.35	99.98	1	0	1					141	3971.46	99.96	1	0	1
142	3971.06	99.95	1	0	1					142	3972.67	99.99	1	0	1
143	3971.52	99.96	1	0	1					143	3972.35	99.98	1	0	1
144	3950.78	99.44	1	0	1					144	3972.67	99.99	1	0	1
145	3968.8	99.89	1	0	1					145	3972.67	99.99	1	0	1
146	3968.47	99.89	1	0	1					146	3972.35	99.98	1	0	1
147	3957.5	99.61	1	0	1					147	3972.67	99.99	1	0	1
148	3973.01	100	1	0	1					148	3971.98	99.97	1	0	1
149	3972.35	99.98	1	0	1					149	3973.01	100	1	0	1
150	3972.35	99.98	1	0	1					150	3972.35	99.98	1	0	1
151	3958.02	99.62	1	0	1					151	3972.35	99.98	1	0	1
152	3972.03	99.98	1	0	1					152	3972.5	99.99	1	0	1
153	3964.27	99.78	1	0	1					153	3972.35	99.98	1	0	1
154	3971.46	99.96	1	0	1					154	3973	100	1	0	1
155	3972.03	99.98	1	0	1					155	3972.67	99.99	1	0	1
156	3972.67	99.99	1	0	1					156	3971.06	99.95	1	0	1
157	3972.67	99.99	1	0	1					157	3971.98	99.97	1	0	1
158	3883.57	97.75	1	0	1					158	3973	100	1	0	1
159	3960.21	99.68	1	0	1					159	3972.35	99.98	1	0	1
160	3963.44	99.76	1	0	1					160	3971.46	99.96	1	0	1
161	3972.5	99.99	1	0	1					161	3973	100	1	0	1
162	3971.98	99.97	1	0	1					162	3972.35	99.98	1	0	1
163	3968.36	99.88	1	0	1					163	3972.5	99.99	1	0	1
164	3963.19	99.75	1	0	1					164	3973.01	100	1	0	1
165	3972.67	99.99	1	0	1					165	3972.67	99.99	1	0	1
166	3962.36	99.73	1	0	1					166	3973	100	1	0	1
167	3972.5	99.99	1	0	1					167	3972.35	99.98	1	0	1
168	3962.67	99.74	1	0	1					168	3970.73	99.94	1	0	1
169	3952.55	99.48	1	0	1					169	3972.5	99.99	1	0	1
170	3970.73	99.94	1	0	1					170	3971.46	99.96	1	0	1
171	3969.76	99.92	1	0	1					171	3973.01	100	1	0	1
172	3970.09	99.93	1	0	1					172	3972.67	99.99	1	0	1
173	3972.67	99.99	1	0	1					173	3971.06	99.95	1	0	1
174	3969.12	99.9	1	0	1					174	3972.35	99.98	1	0	1
175	3966.86	99.85	1	0	1					175	3972.67	99.99	1	0	1
176	3971.46	99.96	1	0	1					176	3972.03	99.98	1	0	1
177	3961.68	99.71	1	0	1					177	3972.35	99.98	1	0	1
178	3970.95	99.95	1	0	1					178	3972.35	99.98	1	0	1
179	3950.52	99.43	1	0	1					179	3972.5	99.99	1	0	1
180	3964.74	99.79	1	0	1					180	3973	100	1	0	1
181	3970.41	99.93	1	0	1					181	3972.35	99.98	1	0	1
182	3957.16	99.6	1	0	1					182	3972.35	99.98	1	0	1
183	3906.84	98.33	1	0	1					183	3972.67	99.99	1	0	1
184	3972.67	99.99	1	0	1					184	3972.67	99.99	1	0	1
185	3972.67	99.99	1	0	1					185	3971.98	99.97	1	0	1
186	3971.46	99.96	1	0	1					186	3972.67	99.99	1	0	1
187	3961.68	99.71	1	0	1					187	3972.35	99.98	1	0	1
188	3972.5	99.99	1	0	1					188	3972.5	99.99	1	0	1
189	3972.35	99.98	1	0	1					189	3973	100	1	0	1
190	3970.43	99.94	1	0	1					190	3973	100	1	0	1
191	3972.67	99.99	1	0	1					191	3972.5	99.99	1	0	1
192	3964.27	99.78	1	0	1					192	3971.46	99.96	1	0	1
193	3972.35	99.98	1	0	1					193	3971.98	99.97	1	0	1
194	3970.41	99.93	1	0	1					194	3972.5	99.99	1	0	1
195	3972.67	99.99	1	0	1					195	3973	100	1	0	1
196	3952.85	99.49	1	0	1					196	3971.46	99.96	1	0	1
197	3971.46	99.96	1	0	1					197	3972.35	99.98	1	0	1
198	3973	100	1	0	1					198	3972.5	99.99	1	0	1
199	3967.33	99.86	1	0	1					199	3973	100	1	0	1
200	3954.02	99.52	1	0	1					200	3972.67	99.99	1	0	1

## Sheet: 09_EHCFMMACO_Seeds(11)
Fast Converegnce Exp							Fast Converegnce Exp			Slow Converegnce Exp							Slow Converegnce Exp
#	CBLF	Quality	Taumax	Taumin	DeltaTauminmax		Global Optimal Solution =	3973.01		#	CBLF	Quality	Taumax	Taumin	DeltaTauminmax		Global Optimal Solution =	3973.01
1	3966.86	99.85	1	0	1		Minimum Optimal Solution =	3855.2		1	3971.98	99.97	1	0	1		Minimum Optimal Solution =	3967.18
2	3964.92	99.8	1	0	1		Mean of Optimal Solution =	3963.58		2	3972.67	99.99	1	0	1		Mean of Optimal Solution =	3972.25
3	3973.01	100	1	0	1		Median of Optimal Solution =	3963.58		3	3972.67	99.99	1	0	1		Median of Optimal Solution =	3972.25
4	3962.16	99.73	1	0	1		Solution Standrad Deviation =	19.1418		4	3972.67	99.99	1	0	1		Solution Standrad Deviation =	0.94656
5	3970.43	99.94	1	0	1		Average Price =	27.24		5	3970.73	99.94	1	0	1		Average Price =	91.76
6	3970.23	99.93	1	0	1		Relability =	51		6	3972.67	99.99	1	0	1		Relability =	98.5
7	3970.41	99.93	1	0	1		Normalized Price =	53.4118		7	3972.67	99.99	1	0	1		Normalized Price =	93.1574
8	3972.5	99.99	1	0	1		Average Solution Quality =	99.7627		8	3972.67	99.99	1	0	1		Average Solution Quality =	99.9809
9	3973.01	100	1	0	1		Average FDC =	-214.765		9	3971.46	99.96	1	0	1		Average FDC =	-89.904
10	3972.67	99.99	1	0	1		Correlation Coefficent =	-0.77118		10	3972.03	99.98	1	0	1		Correlation Coefficent =	-0.74198
11	3973	100	1	0	1		Solution Robustness =	207.064		11	3972.5	99.99	1	0	1		Solution Robustness =	4196.53
12	3970.95	99.95	1	0	1		Performance Rate =	0.018722		12	3973	100	1	0	1		Performance Rate =	0.010735
13	3967.33	99.86	1	0	1		Average Elapsed Time =	1.3186		13	3972.35	99.98	1	0	1		Average Elapsed Time =	4.3402
14	3968.36	99.88	1	0	1					14	3972.67	99.99	1	0	1
15	3962.98	99.75	1	0	1					15	3973.01	100	1	0	1
16	3968.18	99.88	1	0	1					16	3970.73	99.94	1	0	1
17	3970.41	99.93	1	0	1					17	3972.35	99.98	1	0	1
18	3971.98	99.97	1	0	1					18	3971.98	99.97	1	0	1
19	3967.5	99.86	1	0	1					19	3973	100	1	0	1
20	3971.46	99.96	1	0	1					20	3971.06	99.95	1	0	1
21	3968.47	99.89	1	0	1					21	3972.67	99.99	1	0	1
22	3973	100	1	0	1					22	3972.67	99.99	1	0	1
23	3958.92	99.65	1	0	1					23	3971.46	99.96	1	0	1
24	3970.09	99.93	1	0	1					24	3972.5	99.99	1	0	1
25	3970.95	99.95	1	0	1					25	3971.98	99.97	1	0	1
26	3972.67	99.99	1	0	1					26	3972.67	99.99	1	0	1
27	3972.67	99.99	1	0	1					27	3973.01	100	1	0	1
28	3965.26	99.8	1	0	1					28	3973	100	1	0	1
29	3967.84	99.87	1	0	1					29	3972.67	99.99	1	0	1
30	3968.36	99.88	1	0	1					30	3972.5	99.99	1	0	1
31	3970.09	99.93	1	0	1					31	3972.67	99.99	1	0	1
32	3972.5	99.99	1	0	1					32	3972.35	99.98	1	0	1
33	3959.05	99.65	1	0	1					33	3972.5	99.99	1	0	1
34	3969.91	99.92	1	0	1					34	3973.01	100	1	0	1
35	3968.88	99.9	1	0	1					35	3972.35	99.98	1	0	1
36	3855.2	97.03	1	0	1					36	3970.41	99.93	1	0	1
37	3970.73	99.94	1	0	1					37	3972.67	99.99	1	0	1
38	3973	100	1	0	1					38	3971.98	99.97	1	0	1
39	3970.95	99.95	1	0	1					39	3972.67	99.99	1	0	1
40	3966.86	99.85	1	0	1					40	3972.35	99.98	1	0	1
41	3965.24	99.8	1	0	1					41	3970.73	99.94	1	0	1
42	3972.67	99.99	1	0	1					42	3973	100	1	0	1
43	3972.67	99.99	1	0	1					43	3972.5	99.99	1	0	1
44	3962.33	99.73	1	0	1					44	3972.67	99.99	1	0	1
45	3968.36	99.88	1	0	1					45	3972.67	99.99	1	0	1
46	3933.84	99.01	1	0	1					46	3972.35	99.98	1	0	1
47	3972.35	99.98	1	0	1					47	3971.46	99.96	1	0	1
48	3965.78	99.82	1	0	1					48	3971.98	99.97	1	0	1
49	3962.66	99.74	1	0	1					49	3972.35	99.98	1	0	1
50	3970.73	99.94	1	0	1					50	3972.35	99.98	1	0	1
51	3967.84	99.87	1	0	1					51	3972.67	99.99	1	0	1
52	3862.38	97.22	1	0	1					52	3971.06	99.95	1	0	1
53	3965.78	99.82	1	0	1					53	3972.03	99.98	1	0	1
54	3971.98	99.97	1	0	1					54	3973	100	1	0	1
55	3954.19	99.53	1	0	1					55	3973	100	1	0	1
56	3902.83	98.23	1	0	1					56	3973	100	1	0	1
57	3965.24	99.8	1	0	1					57	3971.98	99.97	1	0	1
58	3972.03	99.98	1	0	1					58	3971.98	99.97	1	0	1
59	3970.41	99.93	1	0	1					59	3972.67	99.99	1	0	1
60	3971.52	99.96	1	0	1					60	3973	100	1	0	1
61	3973	100	1	0	1					61	3971.98	99.97	1	0	1
62	3967.18	99.85	1	0	1					62	3973.01	100	1	0	1
63	3970.73	99.94	1	0	1					63	3972.5	99.99	1	0	1
64	3971.98	99.97	1	0	1					64	3970.41	99.93	1	0	1
65	3897.05	98.09	1	0	1					65	3972.35	99.98	1	0	1
66	3973	100	1	0	1					66	3972.35	99.98	1	0	1
67	3966.21	99.83	1	0	1					67	3972.67	99.99	1	0	1
68	3972.67	99.99	1	0	1					68	3973.01	100	1	0	1
69	3949.23	99.4	1	0	1					69	3972.67	99.99	1	0	1
70	3972.5	99.99	1	0	1					70	3973.01	100	1	0	1
71	3968.36	99.88	1	0	1					71	3973	100	1	0	1
72	3960.51	99.69	1	0	1					72	3972.67	99.99	1	0	1
73	3959.57	99.66	1	0	1					73	3972.35	99.98	1	0	1
74	3970.73	99.94	1	0	1					74	3968.8	99.89	1	0	1
75	3970.73	99.94	1	0	1					75	3971.98	99.97	1	0	1
76	3968.36	99.88	1	0	1					76	3972.67	99.99	1	0	1
77	3972.67	99.99	1	0	1					77	3971.98	99.97	1	0	1
78	3973.01	100	1	0	1					78	3973.01	100	1	0	1
79	3936.13	99.07	1	0	1					79	3972.5	99.99	1	0	1
80	3972.5	99.99	1	0	1					80	3973	100	1	0	1
81	3972.35	99.98	1	0	1					81	3973.01	100	1	0	1
82	3969.44	99.91	1	0	1					82	3971.46	99.96	1	0	1
83	3964.59	99.79	1	0	1					83	3972.67	99.99	1	0	1
84	3972.67	99.99	1	0	1					84	3971.98	99.97	1	0	1
85	3968.88	99.9	1	0	1					85	3969.12	99.9	1	0	1
86	3964.92	99.8	1	0	1					86	3973.01	100	1	0	1
87	3968.8	99.89	1	0	1					87	3972.35	99.98	1	0	1
88	3971.98	99.97	1	0	1					88	3972.67	99.99	1	0	1
89	3861.86	97.2	1	0	1					89	3971.46	99.96	1	0	1
90	3972.03	99.98	1	0	1					90	3972.35	99.98	1	0	1
91	3972.5	99.99	1	0	1					91	3970.73	99.94	1	0	1
92	3967.33	99.86	1	0	1					92	3973	100	1	0	1
93	3969.39	99.91	1	0	1					93	3967.18	99.85	1	0	1
94	3969.76	99.92	1	0	1					94	3972.35	99.98	1	0	1
95	3963.19	99.75	1	0	1					95	3973	100	1	0	1
96	3954.34	99.53	1	0	1					96	3973	100	1	0	1
97	3954.02	99.52	1	0	1					97	3972.35	99.98	1	0	1
98	3962.66	99.74	1	0	1					98	3973	100	1	0	1
99	3972.35	99.98	1	0	1					99	3971.46	99.96	1	0	1
100	3968.88	99.9	1	0	1					100	3973	100	1	0	1
101	3972.67	99.99	1	0	1					101	3972.5	99.99	1	0	1
102	3969.12	99.9	1	0	1					102	3973.01	100	1	0	1
103	3905.29	98.3	1	0	1					103	3971.98	99.97	1	0	1
104	3971.52	99.96	1	0	1					104	3972.67	99.99	1	0	1
105	3973	100	1	0	1					105	3973	100	1	0	1
106	3967.33	99.86	1	0	1					106	3973	100	1	0	1
107	3964.74	99.79	1	0	1					107	3971.46	99.96	1	0	1
108	3965.24	99.8	1	0	1					108	3972.67	99.99	1	0	1
109	3902.83	98.23	1	0	1					109	3973.01	100	1	0	1
110	3966.86	99.85	1	0	1					110	3971.98	99.97	1	0	1
111	3972.67	99.99	1	0	1					111	3971.06	99.95	1	0	1
112	3939.93	99.17	1	0	1					112	3972.5	99.99	1	0	1
113	3961.71	99.72	1	0	1					113	3972.5	99.99	1	0	1
114	3961.04	99.7	1	0	1					114	3971.98	99.97	1	0	1
115	3966.03	99.82	1	0	1					115	3972.5	99.99	1	0	1
116	3967.5	99.86	1	0	1					116	3972.35	99.98	1	0	1
117	3941.77	99.21	1	0	1					117	3972.35	99.98	1	0	1
118	3971.06	99.95	1	0	1					118	3972.5	99.99	1	0	1
119	3969.58	99.91	1	0	1					119	3971.06	99.95	1	0	1
120	3905.26	98.29	1	0	1					120	3973	100	1	0	1
121	3970.09	99.93	1	0	1					121	3973	100	1	0	1
122	3961.12	99.7	1	0	1					122	3973	100	1	0	1
123	3972.67	99.99	1	0	1					123	3972.03	99.98	1	0	1
124	3971.06	99.95	1	0	1					124	3973	100	1	0	1
125	3972.03	99.98	1	0	1					125	3972.5	99.99	1	0	1
126	3955.44	99.56	1	0	1					126	3972.67	99.99	1	0	1
127	3972.67	99.99	1	0	1					127	3971.98	99.97	1	0	1
128	3972.03	99.98	1	0	1					128	3971.46	99.96	1	0	1
129	3964.92	99.8	1	0	1					129	3973	100	1	0	1
130	3971.46	99.96	1	0	1					130	3973.01	100	1	0	1
131	3968.36	99.88	1	0	1					131	3971.98	99.97	1	0	1
132	3964.27	99.78	1	0	1					132	3970.73	99.94	1	0	1
133	3972.67	99.99	1	0	1					133	3971.98	99.97	1	0	1
134	3968.8	99.89	1	0	1					134	3973	100	1	0	1
135	3972.67	99.99	1	0	1					135	3972.67	99.99	1	0	1
136	3972.5	99.99	1	0	1					136	3973	100	1	0	1
137	3972.35	99.98	1	0	1					137	3972.67	99.99	1	0	1
138	3971.98	99.97	1	0	1					138	3971.98	99.97	1	0	1
139	3964.59	99.79	1	0	1					139	3973.01	100	1	0	1
140	3969.44	99.91	1	0	1					140	3972.35	99.98	1	0	1
141	3972.35	99.98	1	0	1					141	3970.73	99.94	1	0	1
142	3971.46	99.96	1	0	1					142	3972.67	99.99	1	0	1
143	3961.04	99.7	1	0	1					143	3972.35	99.98	1	0	1
144	3966.03	99.82	1	0	1					144	3972.35	99.98	1	0	1
145	3936.82	99.09	1	0	1					145	3972.35	99.98	1	0	1
146	3971.46	99.96	1	0	1					146	3972.03	99.98	1	0	1
147	3945.61	99.31	1	0	1					147	3973.01	100	1	0	1
148	3950.38	99.43	1	0	1					148	3972.35	99.98	1	0	1
149	3972.03	99.98	1	0	1					149	3970.73	99.94	1	0	1
150	3968.36	99.88	1	0	1					150	3972.67	99.99	1	0	1
151	3972.67	99.99	1	0	1					151	3968.36	99.88	1	0	1
152	3966.53	99.84	1	0	1					152	3972.5	99.99	1	0	1
153	3972.35	99.98	1	0	1					153	3970.73	99.94	1	0	1
154	3959.13	99.65	1	0	1					154	3973	100	1	0	1
155	3971.98	99.97	1	0	1					155	3973	100	1	0	1
156	3973.01	100	1	0	1					156	3973.01	100	1	0	1
157	3972.03	99.98	1	0	1					157	3972.35	99.98	1	0	1
158	3972.67	99.99	1	0	1					158	3973.01	100	1	0	1
159	3972.67	99.99	1	0	1					159	3973	100	1	0	1
160	3968.36	99.88	1	0	1					160	3972.5	99.99	1	0	1
161	3877.89	97.61	1	0	1					161	3970.41	99.93	1	0	1
162	3972.35	99.98	1	0	1					162	3972.67	99.99	1	0	1
163	3966.86	99.85	1	0	1					163	3973	100	1	0	1
164	3963.3	99.76	1	0	1					164	3972.5	99.99	1	0	1
165	3967.82	99.87	1	0	1					165	3972.67	99.99	1	0	1
166	3971.06	99.95	1	0	1					166	3972.67	99.99	1	0	1
167	3966.53	99.84	1	0	1					167	3972.67	99.99	1	0	1
168	3962.77	99.74	1	0	1					168	3972.35	99.98	1	0	1
169	3969.76	99.92	1	0	1					169	3972.67	99.99	1	0	1
170	3967.84	99.87	1	0	1					170	3973.01	100	1	0	1
171	3968.88	99.9	1	0	1					171	3973.01	100	1	0	1
172	3970.09	99.93	1	0	1					172	3971.98	99.97	1	0	1
173	3968.36	99.88	1	0	1					173	3973.01	100	1	0	1
174	3972.67	99.99	1	0	1					174	3969.12	99.9	1	0	1
175	3973	100	1	0	1					175	3972.67	99.99	1	0	1
176	3927.52	98.85	1	0	1					176	3973	100	1	0	1
177	3972.67	99.99	1	0	1					177	3969.44	99.91	1	0	1
178	3964.74	99.79	1	0	1					178	3972.5	99.99	1	0	1
179	3949.23	99.4	1	0	1					179	3972.67	99.99	1	0	1
180	3961.64	99.71	1	0	1					180	3972.5	99.99	1	0	1
181	3972.03	99.98	1	0	1					181	3972.5	99.99	1	0	1
182	3971.98	99.97	1	0	1					182	3972.67	99.99	1	0	1
183	3968.15	99.88	1	0	1					183	3972.67	99.99	1	0	1
184	3970.43	99.94	1	0	1					184	3972.67	99.99	1	0	1
185	3968.88	99.9	1	0	1					185	3969.39	99.91	1	0	1
186	3970.73	99.94	1	0	1					186	3970.73	99.94	1	0	1
187	3972.35	99.98	1	0	1					187	3971.98	99.97	1	0	1
188	3972.67	99.99	1	0	1					188	3973.01	100	1	0	1
189	3970.43	99.94	1	0	1					189	3971.98	99.97	1	0	1
190	3935.14	99.05	1	0	1					190	3973	100	1	0	1
191	3973	100	1	0	1					191	3971.98	99.97	1	0	1
192	3964.92	99.8	1	0	1					192	3969.39	99.91	1	0	1
193	3972.67	99.99	1	0	1					193	3973.01	100	1	0	1
194	3972.67	99.99	1	0	1					194	3972.67	99.99	1	0	1
195	3971.46	99.96	1	0	1					195	3972.5	99.99	1	0	1
196	3972.35	99.98	1	0	1					196	3972.67	99.99	1	0	1
197	3965.78	99.82	1	0	1					197	3972.5	99.99	1	0	1
198	3968.88	99.9	1	0	1					198	3972.35	99.98	1	0	1
199	3972.5	99.99	1	0	1					199	3972.67	99.99	1	0	1
200	3968.36	99.88	1	0	1					200	3971.98	99.97	1	0	1

[truncated: 1 more sheets: 10_EHCFMMACO_Seeds(25)]
