# Supplementary material for: Enhanced Hyper-Cube Framework Aco for Combinatorial Optimization Problems
Source: Preprints.org preprint supplement (doi:10.20944/preprints202108.0573.v1), 2021-08-31
Supplement: Supplementary file 20 [file 10_Performance_Comparison_Results (1).xlsx]

## Sheet: 01_ACO_MM_HCF_EHCF_Comparison
		1. Elapsed Time
			ACOA		HCFACO		EHCFACO		MMACO		HCFMMACO		EHCFMMACO
			Fast Conv.	Slow Conv.	Fast Conv.	Slow Conv.	Fast Conv.	Slow Conv.	Fast Conv	Slow Conv.	Fast Conv.	Slow Conv.	Fast Conv.	Slow Conv.
		min=	0.86068	2.9453	0.010184	4.0102	2.054	6.3218	1.0335	4.5399	0.92206	4.6049	1.307	4.2728
		max=	0.90517	3.0424	0.011134	4.4696	2.4882	7.9533	1.1842	4.731	1.0233	4.8359	1.3784	4.7873
		mean=	0.873914	2.99266	0.0106188	4.15281	2.16365	6.86329	1.1263	4.62216	0.96892	4.6808	1.33569	4.39209
		median=	0.867245	2.981	0.0105765	4.09945	2.1347	6.78185	1.13855	4.60555	0.96293	4.64325	1.32205	4.3188
		STD=	0.0134035	0.0305983	0.000291246	0.139914	0.116381	0.445159	0.0450733	0.0632012	0.034782	0.0728516	0.0241618	0.154649
		2. Reliability
			ACOA		HCFACO		EHCFACO		MMACO		HCFMMACO		EHCFMMACO
			Fast Conv.	Slow Conv.	Fast Conv.	Slow Conv.	Fast Conv.	Slow Conv.	Fast Conv	Slow Conv.	Fast Conv.	Slow Conv.	Fast Conv.	Slow Conv.
		min=	19.6	30	72	90.5	82	98	12.5	80	9.5	88.5	28.61	97.5
		max=	45	45	81	97.5	95	100	19.5	91	21.695	93.5	65.5	99
		mean=	35.71	36.45	77.1	93.15	89.6	98.95	16	87.7	13.1695	91.05	54.361	98.25
		median=	36.25	37	77.25	93	89.5	99	15.75	88.5	12	91	56.5	98
		STD=	6.58308	4.08932	2.5865	2.20284	3.37491	0.522015	2.17945	3.00998	3.76584	1.35	9.32925	0.559017
		3. Normalized Price
			ACOA		HCFACO		EHCFACO		MMACO		HCFMMACO		EHCFMMACO
			Fast Conv.	Slow Conv.	Fast Conv.	Slow Conv.	Fast Conv.	Slow Conv.	Fast Conv	Slow Conv.	Fast Conv.	Slow Conv.	Fast Conv.	Slow Conv.
		min=	42.2	147.667	35.1783	89.8154	27.7258	80.42	127.18	109.39	120.314	107.139	43	93.1574
		max=	59.7778	220.083	39.7569	98.1967	31.5793	83.0051	193.56	157.129	213.632	176.454	60	95.359
		mean=	51.1689	181.125	36.9104	94.2422	28.9173	81.4937	152.232	118.529	169.263	117.302	52.2	98.25
		median=	51.4572	177.955	36.5478	94.5497	28.8295	81.2449	155.346	113.309	166.917	110.795	53	94.0427
		STD=	5.14124	22.3302	1.49477	2.54466	1.07663	0.725781	19.3554	13.6445	28.6512	19.8074	5.11468	0.756622
		4. Performance Rate
			ACOA		HCFACO		EHCFACO		MMACO		HCFMMACO		EHCFMMACO
			Fast Conv.	Slow Conv.	Fast Conv.	Slow Conv.	Fast Conv.	Slow Conv.	Fast Conv	Slow Conv.	Fast Conv.	Slow Conv.	Fast Conv.	Slow Conv.
		min=	0.016729	0.0045437	0.025153	0.010184	0.031666	0.012047	0.005941	0.0079582	0.0048643	0.0087515	0.018722	0.010487
		max=	0.023697	0.006772	0.028427	0.011134	0.036067	0.012435	0.0078629	0.0091416	0.0083116	0.0093337	0.023853	0.010735
		mean=	0.0195812	0.00560266	0.0272117	0.0106188	0.034711	0.0122718	0.00677901	0.00875724	0.00627401	0.00902123	0.0205587	0.0106064
		median=	0.01901	0.00562065	0.0274885	0.0105765	0.0351025	0.0123085	0.0064381	0.0088256	0.00599235	0.0090257	0.0205495	0.0106335
		STD=	0.00202182	0.000668339	0.00113067	0.000291246	0.00124456	0.000108746	0.000674471	0.000332516	0.00122954	0.000158398	0.00139371	8.55794e-05
		5. Solution Quality
			ACOA		HCFACO		EHCFACO		MMACO		HCFMMACO		EHCFMMACO
			Fast Conv.	Slow Conv.	Fast Conv.	Slow Conv.	Fast Conv.	Slow Conv.	Fast Conv	Slow Conv.	Fast Conv.	Slow Conv.	Fast Conv.	Slow Conv.
		min=	99.6154	99.6372	99.9261	99.965	99.9571	99.9807	98.1633	99.9457	98.4528	99.9655	99.7627	99.9791
		max=	99.7658	99.7355	99.9426	99.9782	99.9702	99.9861	98.4226	99.9657	98.695	99.9707	99.8493	99.9819
		mean=	99.6884	99.6855	99.9335	99.9731	99.963	99.9838	98.2766	99.9604	98.5689	98.5689	99.8046	99.9806
		median=	99.6844	99.6967	99.9337	99.9731	99.9631	99.9837	98.2613	99.9621	98.5601	99.9673	99.806	99.9806
		STD=	0.0480204	0.0369342	0.00597164	0.00361408	0.00322752	0.00143931	0.0697982	0.00547043	0.0749351	0.00157607	0.031859	0.000936216
		6. Correlation Coefficient
			ACOA		HCFACO		EHCFACO		MMACO		HCFMMACO		EHCFMMACO
			Fast Conv.	Slow Conv.	Fast Conv.	Slow Conv.	Fast Conv.	Slow Conv.	Fast Conv	Slow Conv.	Fast Conv.	Slow Conv.	Fast Conv.	Slow Conv.
		min=	-0.8015	-0.85498	-0.69433	-1	-1	-1	-1	-0.83431	-1	-1	-1	-0.79162
		max=	-0.79002	-0.83099	-0.65893	-0.66396	-0.6902	-0.68806	-1	-0.80891	-1	-0.72358	-0.7582	-0.7265
		mean=	-0.796106	-0.839855	-0.670691	-0.711625	-0.787193	-0.726516	-1	-0.82008	-1	-0.76699	-0.818383	-0.748666
		median=	-0.796525	-0.83754	-0.666155	-0.682455	-0.69659	-0.6967	-1	-0.819015	-1	-0.74368	-0.77644	-0.7463
		STD=	0.00374835	0.00714692	0.00998375	0.0965438	0.139381	0.0913529	0	0.00689991	0	0.0783959	0.0912512	0.0160568

## Sheet: 02_EHCFACO_RB_BW_EACO
		1. Reliability
			EACO		RBACO		BWACO		EHCFACO
			Fast Conv.	Slow Conv.	Fast Conv	Slow Conv.	Fast Conv.	Slow Conv.	Fast Conv.	Slow Conv.
		min=	6.5	8	5	4	0	57	82	98
		max=	17.045	12	15.07	9.5	1	66.5	95	100
		mean=	10.2045	9.85	8.007	7.55	0.25	60.8	89.6	98.95
		median=	10.25	10	7.5	8	0	60.25	89.5	99
		STD=	2.88468	1.18427	2.95778	1.49081	0.403113	3.10805	3.37491	0.522015
		2. Normalized Price
			EACO		RBACO		BWACO		EHCFACO
			Fast Conv.	Slow Conv.	Fast Conv	Slow Conv.	Fast Conv.	Slow Conv.	Fast Conv.	Slow Conv.
		min=	136.792	211.438	153.381	262.667	1278	167.797	27.7258	80.42
		max=	253.385	794.312	309.8	1547.75	65535	197.482	31.5793	83.0051
		mean=	188.2	607.558	223.047	868.826	38169.6	184.797	28.9173	81.4937
		median=	189.988	607.333	207.333	795.202	65535	185.788	28.8295	81.2449
		STD=	37.1021	156.158	57.7742	328.049	31601	9.43522	1.07663	0.725781
		3. Correlation Coefficient
			EACO		RBACO		BWACO		EHCFACO
			Fast Conv.	Slow Conv.	Fast Conv	Slow Conv.	Fast Conv.	Slow Conv.	Fast Conv.	Slow Conv.
		min=	-1	-1	-1	-1	-1	-0.92922	-1	-1
		max=	-0.81722	-0.86796	-0.83206	-0.88386	-1	0	-0.6902	-0.68806
		mean=	-0.912167	-0.876723	-0.983206	-0.978137	-1	-0.830638	-0.787193	-0.726516
		median=	-0.82144	-0.87478	-1	-1	-1	-0.9223	-0.69659	-0.6967
		STD=	0.00740321	0.00819051	0.050382	0.0438324	0	0.276893	0.139381	0.0913529
		4. Performance Rate
			EACO		RBACO		BWACO		EHCFACO
			Fast Conv.	Slow Conv.	Fast Conv	Slow Conv.	Fast Conv.	Slow Conv.	Fast Conv.	Slow Conv.
		min=	0.0039466	0.001259	0.0032279	0.0006461	0.00039339	0.0050637	0.031666	0.012047
		max=	0.0073104	0.0018592	0.0065197	0.0015465	0.00078647	0.0059596	0.036067	0.012435
		mean=	0.0057253	0.00157732	0.00476792	0.00118332	0.000516311	0.00542578	0.034711	0.0122718
		median=	0.0060012	0.00163065	0.0047893	0.0012587	0.00040601	0.0053825	0.0351025	0.0123085
		STD=	0.00112768	0.000192533	0.000988807	0.000281597	0.000174576	0.000283175	0.00124456	0.000108746
		5. Solution Quality
			EACO		RBACO		BWACO		EHCFACO
			Fast Conv.	Slow Conv.	Fast Conv	Slow Conv.	Fast Conv.	Slow Conv.	Fast Conv.	Slow Conv.
		min=	98.431	98.5362	98.1759	98.5362	91.0837	99.5349	99.9571	99.9807
		max=	98.7056	98.8401	98.7001	98.8401	91.8428	99.7554	99.9702	99.9861
		mean=	98.6029	98.6921	98.4385	98.6921	91.4021	99.6709	99.963	99.9838
		median=	98.6303	98.7011	98.446	98.7011	91.4043	99.6868	99.9631	99.9837
		STD=	0.0892415	0.0915871	0.156612	0.0915871	0.215271	0.0597316	0.00322752	0.00143931
		6. Elapsed Time
			EACO		RBACO		BWACO		EHCFACO
			Fast Conv.	Slow Conv.	Fast Conv	Slow Conv.	Fast Conv.	Slow Conv.	Fast Conv.	Slow Conv.
		min=	0.75747	2.9174	0.77646	2.858	0.6858	5.9176	2.054	6.3218
		max=	0.80385	3.0154	1.1096	2.9334	0.77159	6.2726	2.4882	7.9533
		mean=	0.779401	2.95984	0.870637	2.88341	0.711253	5.98201	2.16365	6.86329
		median=	0.78032	2.95535	0.805065	2.8798	0.70572	5.93205	2.1347	6.78185
		STD=	0.0116017	0.0293635	0.114063	0.0191254	0.0222516	0.103093	0.116381	0.445159
